# Supplementary material for: A Genetic Screen Identifies PRP18a, a Putative Second Step Splicing Factor Important for Alternative Splicing and a Normal Phenotype in Arabidopsis thaliana
Source: G3 (Bethesda). 2018 Feb 27;8(4):1367–77. doi: 10.1534/g3.118.200022 (PMC5873924; doi:10.1534/g3.118.200022)
Supplement: Supplementary file 5 [file 1367TableS1.xlsx]

## Sheet: info
	# of genes
UP	160
DOWN	14

## Sheet: M_p<0.01_multi<0.5_|logFC| >=1
geneID	Length(Kbps)	T-1	T-2	T-3	T-4	T-5	prp18a-1_1	prp18a-1_2	prp18a-1_3	maxMultiRatio	T-TEST	adjP	regulation	logFC
AT1G01140	1.707	50.3286	72.3748	74.645	69.5528	38.7673	24.494	37.1465	23.7837	0	0.00785819	0.0481346	DOWN	-1.10229
AT1G01200	0.982	0.368573	0.594677	0.172317	0.358647	0.53645	1.31384	1.21124	1.42065	0	8.7464e-05	0.00506748	UP	1.69531
AT1G01370	0.992	2.24442	2.42228	2.32251	2.7347	3.41812	6.41148	6.26444	6.61687	0	8.44505e-06	0.0021499	UP	1.29084
AT1G01660	1.707	0.636095	0.611302	1.02943	0.529746	0.273835	2.87517	2.0904	2.35388	0	0.00512712	0.0375118	UP	1.98558
AT1G01720	1.316	90.0577	53.9261	83.6576	78.5172	79.4566	35.9302	25.6697	22.6907	0.00539287	0.00055738	0.0116699	DOWN	-1.45675
AT1G01740	1.688	3.70944	4.06443	4.00925	3.04657	3.97502	8.77344	6.94317	8.16852	0.0101471	0.00932443	0.0532164	UP	1.08199
AT1G01750	0.769	3.79209	2.39628	4.48916	3.25383	4.11522	10.9649	11.0202	9.46943	0.0262362	0.000361152	0.00970891	UP	1.53851
AT1G02010	2.46	5.35462	5.89577	5.42357	5.35136	5.79998	15.2465	12.7238	12.9755	0	0.00860335	0.0507383	UP	1.29428
AT1G02360	1.011	2.91824	4.0244	2.92261	2.68331	5.10054	9.89501	10.3745	13.1186	0	0.00736144	0.0462122	UP	1.65671
AT1G02390	1.791	5.11342	9.6054	4.68771	6.95699	7.88362	1.11857	0.735147	0.750221	0	0.00246266	0.0250016	DOWN	-2.98025
AT1G02610	0.937	30.6327	43.6777	23.2687	43.8144	42.942	5.57003	8.27491	10.4908	0	0.00149287	0.0191329	DOWN	-2.18422
AT1G02620	0.687	9.94608	7.51095	8.77244	10.544	11.1781	1.74589	2.10169	1.56278	0	0.000172089	0.00681139	DOWN	-2.41081
AT1G02630	1.609	0.361277	0.279644	0.444941	0.431861	0.281291	0.157148	0.193704	0.187793	0	0.00530709	0.0381719	DOWN	-1.00283
AT1G02660	2.609	52.7372	42.3113	48.2995	48.6442	43.1328	5.07686	7.2139	8.28689	0	3.3394e-06	0.00153722	DOWN	-2.77731
AT1G02810	1.906	2.29599	2.45612	2.60195	2.37218	2.38627	7.72495	8.34622	7.41722	0	0.00189396	0.0216331	UP	1.69242
AT1G02813	0.612	0.0537639	0.140784	0.106344	0.0777671	0.109112	0.391969	0.384547	0.325648	0	0.000467084	0.0109379	UP	1.91303
AT1G02850	1.804	40.339	50.3873	45.0457	48.4113	41.9802	20.3594	19.9034	23.3815	0	4.07439e-05	0.00358418	DOWN	-1.0923
AT1G02970	1.856	1.14051	0.696336	0.974839	0.805191	1.48313	2.73517	3.06722	2.84383	0	3.35378e-05	0.00319265	UP	1.49854
AT1G03090	2.606	94.7784	61.5859	99.6973	148.574	111.355	37.2823	38.7997	21.514	0.016819	0.00516693	0.0376637	DOWN	-1.66548
AT1G03190	2.771	5.41069	4.99914	5.59463	5.58892	5.46499	12.1549	11.2315	11.1851	0	0.00102386	0.0157608	UP	1.09047
AT1G03220	1.53	81.5562	128.714	96.8245	105.409	104.016	47.9534	50.1325	54.7804	0.000125658	0.00170623	0.0204625	DOWN	-1.01959
AT1G03400	1.236	14.2599	17.9151	13.4483	18.4752	17.9188	5.51297	5.30566	4.42639	0	0.000204978	0.00736695	DOWN	-1.69063
AT1G03610	1.675	70.5673	72.1343	63.4198	111.98	123.228	19.2721	21.0337	16.8995	0	0.00457674	0.0350894	DOWN	-2.21067
AT1G03840	1.686	0.162631	0.505354	0.301095	0.513761	0.822937	0.888292	0.96956	1.0181	0	0.00900194	0.0521374	UP	1.05575
AT1G03990	2.277	1.15121	1.03848	0.87463	1.11616	1.0525	2.51419	2.2934	2.32368	0	0.000107355	0.00551612	UP	1.18349
AT1G04020	2.401	2.10586	2.06937	2.28237	2.03377	3.3529	4.89561	5.44931	5.37395	0	8.03321e-05	0.00488152	UP	1.14527
AT1G04050	2.675	1.24234	1.37069	1.48413	1.30593	1.29532	6.26524	5.28585	5.56853	0	0.00381063	0.0316804	UP	2.09073
AT1G04445	0.519	0.0211326	0.0553372	0.0250801	0.0917022	0.128664	0.312301	0.306388	0.359227	0	6.92933e-05	0.00452142	UP	2.33999
AT1G04570	1.935	0.685843	0.776751	0.585241	0.851025	1.07748	0.385317	0.279407	0.289053	0	0.00292337	0.0273564	DOWN	-1.32275
AT1G04960	1.669	18.433	15.9976	19.4274	14.9938	14.2213	44.9408	43.1142	38.0613	0	0.0016295	0.0199991	UP	1.33927
AT1G05100	1.272	1.81935	1.15151	0.951682	1.115	1.13744	0.606542	0.495048	0.389173	0	0.00567312	0.0396752	DOWN	-1.31342
AT1G05260	1.209	4.70827	6.12091	7.18118	9.01481	12.0592	27.2044	29.3093	23.3813	0	0.000812914	0.013973	UP	1.76848
AT1G05280	1.497	0.285735	0.274985	0.391279	0.209831	0.540241	1.77134	1.32991	1.32701	0	0.0085649	0.0506271	UP	2.11642
AT1G05340	0.711	49.7794	38.1452	45.2376	59.1605	39.5401	8.6901	9.34859	8.00225	0	0.000541539	0.0115031	DOWN	-2.41745
AT1G05430	1.067	24.5157	22.4215	21.556	23.5068	21.2437	49.3697	45.3947	48.6056	0	0.000324056	0.00919728	UP	1.07728
AT1G05575	0.497	8.14311	12.0004	12.388	7.9482	6.07604	2.56987	4.00578	3.2468	0	0.00612102	0.0414281	DOWN	-1.50784
AT1G05675	1.493	0.918271	3.23813	1.71752	1.86804	1.88737	0.0390826	0.217275	0.107651	0.00206484	0.00793615	0.0484532	DOWN	-3.98842
AT1G05700	2.559	0.0814336	0.123454	0.0254329	0.167386	0.20006	1.01596	1.09614	1.30387	0	0.00321137	0.0288312	UP	3.25161
AT1G06090	1.131	2.14314	2.42931	2.61252	3.02141	4.08703	6.20822	7.65329	6.08684	0.00169945	0.00386042	0.0319206	UP	1.21789
AT1G06310	2.07	0.079477	0.134119	0.0943229	0.0965664	0.0609342	0.491734	0.568461	0.624258	0	0.00360639	0.0306963	UP	2.59264
AT1G06320	0.667	0.0822176	0.0717641	0.175636	0.0142709	0.100115	0.651254	0.829646	0.665062	0	0.00267191	0.0261617	UP	3.00995
AT1G06330	0.48	0.0685489	0.0598333	0.0271178	0.0594918	0.0772879	0.931985	0.993846	0.924159	0	0.000120686	0.0058861	UP	4.0225
AT1G06460	1.226	170.851	187.667	166.265	163.801	125.303	86.2929	82.9024	72.6796	0.0631001	0.000624755	0.0123134	DOWN	-1.0136
AT1G06570	1.554	138.341	91.4217	142.819	152.33	120.106	37.2399	31.2569	21.4184	0.0359695	0.000296727	0.00875437	DOWN	-2.10574
AT1G06923	1.228	0.36619	0.148122	0.325016	0.149898	0.21944	0.707733	0.865003	0.667632	0.320475	0.00215931	0.0231974	UP	1.62729
AT1G07040	1.676	39.0745	31.1819	47.8801	43.3282	36.5359	13.6128	14.5087	12.4167	0	0.000583247	0.0118497	DOWN	-1.55118
AT1G07090	0.943	5.03613	5.28919	6.63941	6.40972	5.37392	12.2999	15.2776	12.851	0	0.00762714	0.0472273	UP	1.22886
AT1G07150	1.669	6.52549	4.70923	5.70108	3.63296	3.9521	2.83963	2.13037	1.81428	0	0.00574664	0.0399566	DOWN	-1.11678
AT1G07270	1.518	0.556339	0.599121	0.488764	0.332339	0.542542	1.20015	1.13553	1.29172	0	6.97558e-05	0.00452524	UP	1.26299
AT1G07280	2.172	51.0468	53.3718	47.8652	49.4385	42.8064	22.7127	20.3323	17.1527	0	3.08283e-05	0.00303798	DOWN	-1.28526
AT1G07290	1.155	0.788164	1.00292	1.09317	1.16202	1.70234	3.62059	4.66445	3.97981	0	0.00325133	0.0290657	UP	1.83021
AT1G07520	2.242	14.1232	10.8661	16.2155	11.7009	9.01145	5.70549	5.33237	5.34788	0.000687077	0.00518816	0.0376632	DOWN	-1.18093
AT1G07560	2.616	0.859878	0.596503	0.621969	1.20576	1.08687	3.10314	3.03584	2.69837	0.00126788	5.5905e-05	0.00411079	UP	1.75262
AT1G07610	0.457	84.0707	97.2625	67.7602	120.577	128.082	226.294	242.608	255.089	0	5.39765e-05	0.00407601	UP	1.27751
AT1G07900	0.576	1.61852	1.54569	2.14683	1.53687	2.25423	0.46149	0.276068	0.680842	0	0.000466706	0.0109443	DOWN	-1.94498
AT1G08170	0.732	0.0149834	0.0130783	0.0177822	0.0130037	0.0101361	0.0797137	0.0782043	0.0614788	0	0.00735357	0.0461973	UP	2.40618
AT1G08260	6.486	3.70249	4.20114	3.80431	4.02247	4.74307	9.87281	10.7576	10.1546	0.0900991	4.35193e-05	0.00367443	UP	1.32544
AT1G08310	1.483	2.611	2.13417	7.23747	0.835563	0.777448	11.1463	9.21546	7.31291	0.0692884	0.00820572	0.0493901	UP	1.76239
AT1G08620	4.395	8.18388	8.5565	8.59182	7.96365	8.56265	18.6482	16.3639	15.7761	0.000663248	0.00918852	0.0528085	UP	1.01594
AT1G08670	0.791	0.596228	0.278365	1.10254	0.637788	1.09747	3.36873	3.24062	2.33262	0	0.00877337	0.0513177	UP	2.00521
AT1G08920	2.019	28.927	29.6399	20.3662	22.7006	22.0311	9.94503	10.2608	9.23104	0	0.00121401	0.0172497	DOWN	-1.33377
AT1G08930	1.881	134.838	164.385	161.091	126.334	89.0869	40.0825	63.5352	78.2443	0	0.00571446	0.0398152	DOWN	-1.15665
AT1G09090	2.701	0.92994	0.196552	1.2858	0.358558	1.00257	4.63863	3.8499	3.88188	0.0245774	0.000295677	0.00873106	UP	2.44991
AT1G09170	3.033	0.119333	0.236729	0.278957	0.147504	0.266647	0.874283	0.698347	0.638018	0	0.00771355	0.0475172	UP	1.81219
AT1G09450	2.096	1.28202	1.83154	1.79475	2.18439	1.80181	4.09851	4.45183	3.96594	0	5.40674e-05	0.00405554	UP	1.22978
AT1G09540	1.498	0.636983	0.415398	0.686454	0.336776	0.450725	1.64032	1.89799	1.41196	0	0.00556954	0.0393439	UP	1.70743
AT1G09600	2.145	0.332358	0.290101	0.442988	0.29732	0.328609	0.680075	0.738365	0.698341	0	3.06797e-05	0.00303223	UP	1.06064
AT1G09780	1.911	23.6402	31.3651	22.389	29.2036	41.4078	51.5074	64.7611	68.7334	6.57142e-05	0.00812734	0.0491473	UP	1.05885
AT1G09950	1.027	0.566012	0.717767	1.02662	0.750744	0.469597	0.246204	0.0805141	0.356815	0	0.00901848	0.0522062	DOWN	-1.63192
AT1G10150	1.791	30.7844	32.1943	31.0987	31.7662	28.622	10.269	12.945	10.7432	0.00132312	3.00938e-05	0.00300081	DOWN	-1.44853
AT1G10385	2.265	0.00484231	0.00422664	0.0517214	0.00420251	0.00327578	0.0658356	0.0702055	0.0482525	0	0.00634157	0.042341	UP	2.16968
AT1G10400	1.421	0.100339	0.0606333	0.174043	0.0736844	0.0469928	0.460817	0.514758	0.493141	0	6.69741e-06	0.00199168	UP	2.42539
AT1G10417	1.641	0.487905	0.764233	0.372808	0.597456	0.718904	1.30774	1.42251	1.29676	0	0.000124229	0.00597222	UP	1.19022
AT1G10460	0.999	0.296428	0.392899	0.482095	0.314431	0.453051	1.01891	1.02508	1.11332	0	1.04146e-05	0.00231769	UP	1.44042
AT1G10530	0.996	0.920551	0.818041	1.06157	0.642752	0.961901	2.05887	2.20722	2.01234	0.00721884	1.43821e-05	0.00223748	UP	1.24829
AT1G10690	0.641	12.1656	10.3201	10.0112	14.5379	14.1795	6.05857	5.98354	5.18527	0	0.00153882	0.01944	DOWN	-1.0922
AT1G10710	1.752	0.0187805	0.071035	0.0371477	0.0923617	0.173633	0.255338	0.228721	0.172466	0	0.00946308	0.0536885	UP	1.47744
AT1G10770	0.779	1.45017	1.26579	1.55397	1.57627	1.00008	0.624202	0.530732	0.651971	0	0.00120657	0.0171658	DOWN	-1.18483
AT1G10820	1.625	16.8749	15.8011	18.5729	19.0184	16.3315	40.3395	34.7522	37.1124	0.00339977	0.0025473	0.0254836	UP	1.11067
AT1G10990	0.91	1.48246	0.852132	2.41736	1.62132	1.2964	3.62642	3.82336	4.35896	0	0.00044706	0.0108002	UP	1.35958
AT1G11050	2.282	18.4415	18.0853	21.487	14.6618	10.5247	5.79299	4.9809	5.31612	0.0474453	0.00357145	0.0304839	DOWN	-1.63346
AT1G11080	1.978	6.65943	3.91548	8.23241	5.44269	4.31749	13.4355	11.599	10.612	0	0.00268159	0.0261954	UP	1.05635
AT1G11160	3.812	0.509262	0.534921	0.611218	0.397028	0.519686	1.22286	1.17968	1.21259	0	7.54373e-06	0.00204435	UP	1.22806
AT1G11175	0.798	18.9532	17.6711	18.7419	25.9677	24.1092	7.92142	9.0308	6.95259	0	0.000712711	0.0130945	DOWN	-1.40412
AT1G11210	1.213	103.935	85.8443	92.7899	135.42	96.9798	20.8933	24.9653	12.7996	0.000156037	0.000241086	0.00788847	DOWN	-2.39712
AT1G11260	1.905	538.437	524.945	511.595	693.725	464.306	135.389	171.837	129.959	0	0.000227553	0.00766971	DOWN	-1.90721
AT1G11580	1.876	12.5054	22.0197	18.5743	17.9363	22.2708	97.8071	76.8394	80.6461	0	0.00608799	0.0413128	UP	2.18907
AT1G11590	1.686	0.0613169	0.0302075	0.0404302	0.00564572	0.0137761	0.0678235	0.0679279	0.0850836	0.0740697	0.00948615	0.0537378	UP	1.28179
AT1G11655	0.503	0.109024	0.0190325	0.439923	0.170315	0.19176	0.88937	1.07486	0.805214	0	0.00107576	0.0161311	UP	2.31117
AT1G11960	2.66	4.51495	7.91419	11.3283	6.48058	4.67214	18.6726	20.3803	18.1533	0	0.000192497	0.0071556	UP	1.44949
AT1G12160	1.629	1.3533	1.49859	1.87777	1.64196	2.26369	4.20683	3.70548	3.35851	0	0.00301824	0.0279024	UP	1.12124
AT1G12200	1.685	8.24702	9.88013	10.9154	10.0836	8.4324	25.2756	24.6233	19.9354	0	0.00950211	0.0537467	UP	1.2912
AT1G12220	3.039	9.29324	10.5247	10.2325	11.824	8.88452	4.98147	4.79087	4.00944	0.000153608	0.000100646	0.00535991	DOWN	-1.14393
AT1G12250	1.051	69.3655	64.7543	64.3397	57.882	53.2223	35.2422	27.4578	23.3729	0	0.00106908	0.0160668	DOWN	-1.10964
AT1G12560	1.033	1.75188	1.01016	2.48234	1.1334	1.35751	6.11935	6.31136	4.77347	0	0.00361128	0.0307224	UP	1.8902
AT1G12710	1.274	21.3244	31.4177	21.8952	24.7381	21.5426	7.98463	8.16296	10.5517	0	0.000586124	0.0118866	DOWN	-1.44219
AT1G12730	1.72	12.2113	12.2171	12.1917	13.6195	11.5306	4.32351	4.91469	5.13193	0	1.85991e-06	0.00127552	DOWN	-1.36687
AT1G12780	1.462	147.27	126.922	119.757	179.312	174.564	60.66	69.8667	70.9951	0.000425101	0.0017156	0.0205091	DOWN	-1.1548
AT1G12805	0.523	3.62798	0.75049	9.03444	0.0910009	1.77334	22.2022	20.2494	21.8436	0	0.000124196	0.00597921	UP	2.81029
AT1G13120	2.427	11.5915	10.023	12.137	8.49897	9.74916	28.4579	25.183	26.0998	0	0.000211356	0.00746051	UP	1.35378
AT1G13260	1.575	60.7026	68.9462	59.2481	58.5445	36.8626	17.0379	30.4219	31.4752	0	0.00550769	0.0390712	DOWN	-1.11173
AT1G13300	1.237	11.8899	10.4711	11.1646	11.7964	14.6533	36.0753	41.3466	35.3565	0	0.00214131	0.023063	UP	1.64802
AT1G13420	1.213	0.171796	0.260445	0.61166	0.855348	0.39759	2.03641	2.55369	2.21011	0	0.00041743	0.0104681	UP	2.30289
AT1G13470	1.272	0.0948476	0.0526834	0.0920983	0.0673492	0.0291652	0.280335	0.295029	0.288089	0	1.64264e-05	0.00222577	UP	2.098
AT1G13500	1.161	0.0472344	0.0742119	0.0560575	0.122981	0.00639073	0.536234	0.612984	0.481754	0.0107895	0.001415	0.0186469	UP	3.14698
AT1G13700	1.018	23.5979	30.6707	19.2997	29.8631	32.7423	6.55213	10.1542	12.4502	0.0179426	0.00118387	0.0169649	DOWN	-1.48659
AT1G13750	2.082	1.56923	1.76601	3.98595	1.79878	1.74392	8.44254	7.41698	6.00759	0.00448122	0.00475493	0.0359147	UP	1.74619
AT1G13830	0.832	0.645942	0.909006	0.610151	1.26992	1.54278	3.10922	2.59165	3.29946	0	0.00101345	0.0156507	UP	1.59143
AT1G13990	1.164	92.1429	74.1604	116.78	73.132	47.6731	28.8689	29.0873	22.4704	0.000348705	0.00833071	0.0497327	DOWN	-1.59125
AT1G14080	1.808	0.370043	0.301814	0.727142	0.531741	0.808445	2.00454	1.88919	1.9237	0	4.87561e-05	0.00390096	UP	1.8236
AT1G14120	1.19	5.42861	14.7622	8.32403	11.3024	11.7779	27.6061	20.7335	22.0474	0	0.006506	0.0429524	UP	1.18504
AT1G14160	0.919	0.497523	0.755853	0.710356	0.664944	1.29707	4.6326	4.54839	3.73704	0.0238813	0.00173845	0.0205555	UP	2.45531
AT1G14210	0.891	15.0659	14.3288	16.191	15.7148	13.5537	31.7612	28.8378	32.2073	0.103093	0.00112122	0.0164747	UP	1.04711
AT1G14220	0.687	0.303331	0.738554	0.738931	0.0692772	0.529202	2.18	1.54618	1.73123	0	0.00449656	0.0348082	UP	1.93465
AT1G15010	0.536	16.1857	22.6295	22.4147	26.869	24.4599	2.9151	5.42314	2.69871	0	0.000122829	0.00594747	DOWN	-2.6133
AT1G15210	4.533	0.854102	1.26082	1.55349	1.65259	2.53214	5.79971	5.58606	5.36241	0	2.74125e-05	0.00289676	UP	1.82963
AT1G15800	1.067	15.9224	11.7625	19.5553	18.2434	15.9449	7.00594	7.99399	6.48918	0	0.00145908	0.0189528	DOWN	-1.18496
AT1G15890	2.907	1.63623	2.35464	2.37764	2.46563	1.87663	1.02815	0.986804	0.96644	0.00157056	0.00200149	0.0222561	DOWN	-1.10804
AT1G16110	2.358	10.3306	19.0939	14.7002	16.1592	10.5442	6.0627	5.92093	5.02482	0	0.00636268	0.0423893	DOWN	-1.3211
AT1G16130	2.555	5.9883	4.85224	7.20878	5.68141	3.99876	1.1495	1.21735	1.09959	0	0.00122161	0.0172918	DOWN	-2.26293
AT1G16160	2.136	0.0462127	0.112047	0.0792206	0.111408	0.135471	0.258	0.223336	0.195637	0	0.00339968	0.029712	UP	1.21999
AT1G16190	1.433	10.9525	12.927	10.8184	12.3218	13.4503	26.9786	25.5268	26.4739	0.000286674	8.98548e-07	0.00116134	UP	1.12222
AT1G16400	1.878	10.4247	8.21347	11.9145	7.34429	4.63431	23.9859	21.8015	17.6265	0.000146624	0.00559102	0.0393797	UP	1.31324
AT1G16500	1.005	1.34233	1.26692	1.46355	1.58171	1.86783	3.30943	3.67713	3.16649	0	0.000577821	0.0118541	UP	1.16962
AT1G16530	0.642	0.187922	0.283323	0.141925	0.252053	0.404497	1.22194	1.69418	1.53213	0	0.00740786	0.0463478	UP	2.5457
AT1G16705	0.79	0.263783	0.109063	0.115337	0.204833	0.103311	0.38572	0.330108	0.46386	0	0.00690088	0.0444332	UP	1.30394
AT1G16905	1.386	0.0395665	0.0345358	0.0845231	0.0618097	0.305136	0.58472	0.610362	0.746795	0	0.000459566	0.010914	UP	2.62246
AT1G17240	2.302	0.281104	0.569742	0.333613	0.359742	0.377106	0.966029	0.721165	0.784765	0	0.00859657	0.0507072	UP	1.10053
AT1G17260	2.844	0.628606	0.494824	0.709412	0.90702	0.873972	1.63908	1.64383	1.43995	0	0.000202336	0.00733474	UP	1.1231
AT1G17285	0.537	0.510606	0.69527	0.7999	0.549496	0.980994	3.85139	3.89691	3.31623	0	0.000889471	0.0146089	UP	2.38261
AT1G17300	0.695	0.29984	0.179069	0.243475	0.0410879	0.160136	1.2407	1.05248	1.04528	0	0.000334392	0.00934851	UP	2.59079
AT1G17960	1.565	1.04422	0.960392	1.02303	1.97672	2.01492	2.95377	3.15796	3.12614	0	0.00164936	0.0201253	UP	1.1332
AT1G18140	1.931	0.141997	0.292505	0.222448	0.231682	0.172907	0.480126	0.583029	0.462776	0	0.0031172	0.0283646	UP	1.2605
AT1G18265	1.042	9.96788	9.98677	9.58129	9.63745	8.86511	4.9092	3.79073	3.72039	0	0.00085689	0.0143258	DOWN	-1.21452
AT1G18570	1.654	35.788	33.5414	51.2871	34.8808	18.6567	10.1719	11.8021	9.5812	0	0.00885664	0.0516251	DOWN	-1.72745
AT1G18750	1.88	6.65654	5.17876	5.39356	5.45299	4.24261	2.66577	2.56116	2.69126	0	0.00193198	0.02183	DOWN	-1.02871
AT1G18835	0.299	0.330135	0.0320178	0.217668	0.795877	0.372222	1.53953	1.85075	2.04264	0	0.000801	0.0138532	UP	2.37305
AT1G18970	0.81	0.0677026	0.0118189	0.0160698	0.0587574	0.229001	0.904471	0.87164	0.674641	0	0.00205582	0.0225764	UP	3.41346
AT1G18980	0.792	5.38698	5.57235	6.72194	5.49248	6.90438	11.1413	13.5484	11.4536	0	0.00680923	0.0440457	UP	1.00198
AT1G19200	0.732	2.77192	2.31486	2.11608	1.54744	1.79409	4.30289	4.59668	3.97856	0.00580333	0.000255445	0.00812875	UP	1.02541
AT1G19400	1.672	81.0058	91.7883	66.6476	119.046	124.274	46.2096	44.9466	34.3556	0	0.00578382	0.0400989	DOWN	-1.20653
AT1G19770	1.396	131.087	172.354	159.061	141.573	108.238	42.9918	53.113	48.9767	0.000718827	0.000697603	0.012973	DOWN	-1.55869
AT1G19840	0.462	2.68261	1.71988	3.69084	1.79248	3.13166	6.30094	6.1541	6.63766	0	0.000247704	0.00796541	UP	1.28954
AT1G20030	1.652	16.1397	19.5465	14.553	19.1123	19.7842	7.51554	5.41731	4.57263	0	0.000139823	0.0062151	DOWN	-1.61123
AT1G20080	1.851	0.100731	0.118955	0.00703218	0.107992	0.124262	0.227671	0.188997	0.191027	0	0.00471284	0.0357657	UP	1.14191
AT1G20400	2.835	0.359975	0.388718	0.593762	0.312765	0.369657	3.3202	2.44325	2.68293	0.00250122	0.00963753	0.0542388	UP	2.79746
AT1G20450	1.524	128.627	228.045	162.921	245.356	225.018	87.2235	80.3383	62.3699	0	0.00395728	0.0323396	DOWN	-1.36921
AT1G20650	1.828	37.1424	48.5717	31.1879	56.5325	60.733	21.4427	22.3213	17.3962	0.000666728	0.0076334	0.0472225	DOWN	-1.19991
AT1G21000	1.3	93.2181	78.4498	109.85	125.61	127.315	28.0232	29.0974	20.9237	0	0.000640344	0.0124167	DOWN	-2.03871
AT1G21010	0.818	28.6799	23.6524	25.6035	26.636	26.4948	11.6114	12.9467	9.67483	0	0.000106382	0.00548291	DOWN	-1.19988
AT1G21130	1.453	231.189	417.869	341.436	499.866	415.129	80.7408	105.671	86.75	0.00133312	0.00263377	0.0259546	DOWN	-2.06537
AT1G21240	2.354	0.0419331	0.00406684	0.0276477	0.00404362	0.00315193	0.0468213	0.056743	0.0573524	0	0.0066266	0.0433146	UP	1.73008
AT1G21310	1.663	123.284	94.8756	206.097	125.758	102.71	451.181	384.012	322.262	0.00194175	0.0077449	0.0476579	UP	1.56338
AT1G21400	1.955	127.816	75.7591	132.076	160.63	113.283	42.4454	48.6303	25.3441	0	0.00219202	0.0234215	DOWN	-1.65148
AT1G21410	1.408	29.5306	27.4213	29.6663	28.0355	23.2338	14.8869	9.22922	7.98594	0	0.00468952	0.0356208	DOWN	-1.36579
AT1G21450	2.298	33.2805	31.2154	36.0872	36.4055	32.7555	18.584	17.2578	13.0229	0	0.00159414	0.0197965	DOWN	-1.05953
AT1G21530	1.65	0.0332358	0.00580202	0.0394441	0.0057689	0.0404707	0.0903743	0.0809533	0.097408	0	0.000465083	0.0109444	UP	1.84444
AT1G21670	2.285	41.5529	46.3249	40.1092	51.4093	41.4818	16.3517	14.6948	10.1428	0	4.96508e-05	0.0039258	DOWN	-1.68594
AT1G21680	2.335	191.77	158.155	192.283	215.612	158.977	56.0403	46.6872	30.1072	0	4.62175e-05	0.00382536	DOWN	-2.05
AT1G22150	1.971	0.239278	0.121427	0.693424	0.0724406	0.0715236	1.20063	1.33279	0.962219	0	0.00148008	0.0190854	UP	2.28178
AT1G22190	1.507	84.0673	57.2049	95.4692	54.1624	38.4078	19.3383	15.7559	16.7101	0	0.00928272	0.0530866	DOWN	-1.93134
AT1G22220	1.201	1.105	0.932622	2.13511	0.816341	1.10584	4.1729	3.13	3.13149	0	0.00639728	0.0425186	UP	1.51263
AT1G22440	1.478	4.53406	5.87484	6.4026	7.28392	6.89253	24.4991	25.6619	22.075	0	0.000791305	0.0137563	UP	1.95798
AT1G22460	2.106	0.0885342	0.0318202	0.129795	0.0045198	0.0458002	0.243204	0.280882	0.296109	0	0.000223365	0.00762801	UP	2.18572
AT1G22570	1.698	12.5633	31.3191	16.3359	23.4043	20.2795	4.85299	6.49173	9.28749	0	0.00955491	0.0539454	DOWN	-1.59529
AT1G22890	0.559	56.8012	56.4296	69.0413	61.25	41.7172	17.1769	19.537	18.4357	0	0.000827457	0.0140718	DOWN	-1.63378
AT1G23210	1.47	0.06715	0.0716372	0.132822	0.0582777	0.146374	0.418994	0.523561	0.397981	0	0.00420885	0.0334518	UP	2.22995
AT1G23390	1.538	278.852	291.912	214.265	290.592	303.245	114.69	108.705	99.8741	0	0.000257116	0.00815106	DOWN	-1.35571
AT1G23410	0.608	8.02744	7.54215	8.88466	6.93549	10.2142	17.3708	16.7071	19.53	0	0.000927339	0.0149102	UP	1.10269
AT1G23540	2.278	0.101108	0.0714428	0.119995	0.0376068	0.0618846	0.304531	0.321102	0.33584	0	8.72251e-06	0.0021874	UP	2.03122
AT1G23560	1.303	1.47543	1.31085	1.22538	1.3145	1.52226	3.63736	3.30294	3.49396	0.0553601	0.000160267	0.0065678	UP	1.34445
AT1G23710	1.176	54.1397	33.8404	70.2961	49.8193	43.6408	6.90788	8.42133	7.49495	0	0.00204574	0.0225467	DOWN	-2.72631
AT1G23720	2.886	6.07677	3.63893	8.91675	5.00341	6.88231	19.6456	19.6174	15.6936	0.00224215	0.00178008	0.0208643	UP	1.58559
AT1G23870	2.973	51.7546	39.0563	47.4114	56.9174	61.9517	17.7587	19.1302	13.8853	0.0130229	0.00040888	0.0103776	DOWN	-1.60315
AT1G24145	0.523	35.6297	34.0649	45.0229	33.2153	17.0098	6.30983	4.39041	1.65948	0	0.00214078	0.0230647	DOWN	-3.00128
AT1G24147	0.628	14.1639	19.7412	14.2395	10.5948	8.18759	5.17225	1.73195	1.66866	0	0.00380223	0.0316654	DOWN	-2.22777
AT1G24148	1.302	27.5543	31.8008	26.0031	21.6327	19.1076	11.209	6.59023	6.15735	0	0.000776507	0.0136617	DOWN	-1.65909
AT1G24265	1.471	4.18284	3.32561	3.38908	3.48781	3.48536	12.6803	12.2067	12.1542	0	1.97198e-07	0.000552221	UP	1.7885
AT1G24320	2.528	0.154474	0.3134	0.153837	0.270319	0.345123	0.544606	0.533422	0.469764	0.0394389	0.00125463	0.0175742	UP	1.06015
AT1G24400	1.749	10.7546	9.58428	10.9327	9.09419	7.24146	4.96355	4.86956	3.48831	0	0.000813936	0.0139834	DOWN	-1.10047
AT1G24575	0.493	5.85099	7.90334	10.0066	5.11654	6.96814	24.6316	21.817	27.5283	0	0.00219979	0.0234672	UP	1.78224
AT1G24620	0.748	0.30792	0.08959	0.435045	0.0890787	0.208305	0.58073	0.53572	0.610233	0	0.00459345	0.0351693	UP	1.34872
AT1G25550	1.396	174.283	202.473	178.53	199.736	197.497	36.3227	46.8344	51.565	0	1.1791e-06	0.0012382	DOWN	-2.0848
AT1G26680	3.308	0.162462	0.251777	0.318725	0.29638	0.455316	0.64089	0.697976	0.748228	0	0.000435204	0.0106905	UP	1.22833
AT1G26700	1.733	0.0189864	0.0497172	0.097643	0.0823891	0.0984718	0.19828	0.25325	0.26339	0.0384615	0.00210432	0.0228404	UP	1.77895
AT1G26870	1.278	0.00858202	0.0374543	0.0916659	0.067033	0.0406396	0.268872	0.263781	0.296797	0	1.26401e-05	0.00213447	UP	2.49413
AT1G26970	1.55	0.0636842	0.104998	0.495469	0.178092	0.224982	0.899307	0.841243	0.750733	0	0.000468252	0.0109348	UP	1.95999
AT1G27020	1.276	14.0536	5.01925	20.4327	4.19986	2.97134	51.1506	56.104	65.5942	0	0.000522048	0.0113693	UP	2.6257
AT1G27100	2.09	65.9486	73.4765	70.2956	70.3336	59.2541	19.4594	21.3552	20.508	0	2.33098e-05	0.00266429	DOWN	-1.73114
AT1G27200	2.202	13.4732	17.125	12.7269	17.3299	16.8374	8.12336	7.7789	7.28437	0	0.00100675	0.0155974	DOWN	-1.0038
AT1G27290	1.021	146.707	129.217	160.138	132.656	139.665	51.6448	65.1076	63.0614	0	2.30368e-05	0.00266941	DOWN	-1.24106
AT1G27620	1.465	1.22031	1.01288	0.541986	0.838165	0.926821	2.3942	2.16652	2.26	0	4.96475e-05	0.0039348	UP	1.32415
AT1G27720	2.163	0.360016	0.526688	0.535587	0.497278	0.559131	1.74669	1.53106	1.60203	0.0571429	0.000348174	0.00957449	UP	1.7142
AT1G27740	1.125	0.438713	0.314856	0.914052	0.499202	0.336357	1.48109	1.91667	1.53723	0	0.00193917	0.0218817	UP	1.71625
AT1G27760	2.123	19.957	23.1849	21.9068	14.381	15.5138	42.6278	36.8664	38.4979	0.000145417	0.000283637	0.00854827	UP	1.05052
AT1G27770	3.484	53.6964	66.2782	62.3442	47.2889	34.9025	10.7288	11.2443	10.793	8.8616e-05	0.00167009	0.0202533	DOWN	-2.27608
AT1G28070	0.751	12.4283	16.5334	14.5418	17.7319	16.7856	7.22581	7.90207	7.73013	0	0.000817091	0.0140161	DOWN	-1.0342
AT1G28100	1.74	10.5599	12.0721	8.60125	11.9031	13.5313	26.1385	26.907	28.6832	0.238543	1.25018e-05	0.00214342	UP	1.26528
AT1G28290	1.436	63.3705	57.8466	78.2353	56.2836	56.0864	157.384	122.575	135.299	0	0.00867965	0.0510003	UP	1.15025
AT1G28330	1.07	693.689	510.956	907.814	1024.68	716.66	225.821	340.329	205.323	0	0.00270884	0.026339	DOWN	-1.58363
AT1G28380	2.202	30.3871	53.6513	41.4547	34.6271	30.4415	13.1212	11.7044	11.9084	0.0182341	0.00392701	0.0322176	DOWN	-1.63811
AT1G29200	2.225	0.175303	0.415937	0.444269	0.212955	0.240189	0.989364	1.02731	1.05851	0.0193041	6.50612e-05	0.00443472	UP	1.78363
AT1G29340	2.424	36.8173	41.6858	40.0646	36.9556	35.0321	14.9219	13.9571	13.741	0	1.3114e-05	0.00217085	DOWN	-1.42364
AT1G29560	2.248	3.3065	3.82512	3.26873	4.19484	4.79148	1.99627	1.85438	1.65242	0.00979403	0.00118721	0.0169983	DOWN	-1.07979
AT1G29690	2.238	20.4801	30.9657	25.7714	21.6531	17.8728	7.55815	6.63062	7.62681	0	0.00195382	0.0219585	DOWN	-1.68294
AT1G29830	2.455	0.0224431	0.035326	0.0265463	0.0737502	0.009087	0.490207	0.469569	0.464071	0.00732904	5.56277e-08	0.000373863	UP	3.82752
AT1G30140	0.975	0.0562453	0.0098188	0.0133503	0.00976276	0.00760988	0.086445	0.0978557	0.112094	0	0.000574038	0.0118198	UP	2.3516
AT1G30190	0.837	0.537253	0.468944	0.419889	0.830185	0.647113	0.0852057	0.0379965	0.130576	0	0.00144566	0.0188733	DOWN	-2.77913
AT1G30250	0.525	2.73673	1.11233	1.71075	2.59271	2.75586	0.506321	0.787505	0.159193	0	0.00452664	0.0348964	DOWN	-2.17135
AT1G30260	0.678	12.4399	9.64393	8.8121	11.414	9.83813	3.81544	2.35474	2.26625	0	9.48687e-05	0.00525201	DOWN	-1.89094
AT1G30500	0.97	18.6001	17.2024	22.7454	23.4827	20.2472	11.5698	10.2622	7.81413	0	0.000823764	0.0140659	DOWN	-1.04961
AT1G30750	0.803	3.5922	2.46784	3.16093	2.50118	3.72368	7.48455	8.05573	6.39691	0	0.0036705	0.0309675	UP	1.24313
AT1G30820	2.48	21.9843	19.1737	22.7527	25.689	29.8251	11.7877	11.8723	11.2221	0	0.00232908	0.0242386	DOWN	-1.03858
AT1G30900	1.896	1.41726	1.78238	1.69572	1.92282	2.27363	3.79907	3.56611	3.72647	0	3.68303e-05	0.00340949	UP	1.0238
AT1G31130	1.495	88.4102	101.093	94.6857	76.7544	65.4764	35.4179	37.9382	38.6295	0	0.00146046	0.0189342	DOWN	-1.192
AT1G31290	3.585	6.27476	6.52909	5.72583	5.79087	4.93607	1.98751	2.23021	2.0569	0	8.38315e-05	0.00496838	DOWN	-1.4842
AT1G31740	2.361	0.00464542	0.00405478	0.00551316	0.00403164	0.00314258	0.0137302	0.0134702	0.0136148	0	1.08737e-05	0.00225555	UP	1.6693
AT1G31770	2.456	3.97896	6.05349	4.06502	6.6158	8.02082	10.8523	12.9103	14.9127	0	0.00826875	0.0495741	UP	1.16561
AT1G32510	0.852	0.0386191	0.168545	0.0763883	0.0111722	0.200295	0.418731	0.350879	0.415013	0.000494696	0.000497407	0.0111805	UP	1.99584
AT1G32640	2.179	108.203	77.8476	87.0299	63.4507	72.2997	29.1559	19.4321	13.4332	0	0.000517449	0.0113724	DOWN	-1.98371
AT1G33030	1.232	0.365001	0.427381	0.771273	0.208608	0.355323	0.78411	0.903497	0.923457	0.0229885	0.00638843	0.042485	UP	1.03239
AT1G33475	0.974	7.8036	5.67432	6.08944	6.6626	7.43313	2.89555	3.53418	2.99101	0.00144909	0.000286729	0.00859521	DOWN	-1.10029
AT1G33500	0.976	0.348363	0.0882787	0.333416	0.165797	0.159644	0.644352	0.462709	0.638941	0	0.00654064	0.0430795	UP	1.40943
AT1G33540	1.341	0.0408942	0.0642505	0.00970661	0.0780802	0.160454	0.517316	0.630844	0.560913	0	0.000185457	0.00704191	UP	3.01086
AT1G33600	1.588	48.7958	74.4586	52.0416	60.5348	54.867	19.6175	20.7201	19.2746	0	0.000994589	0.0155235	DOWN	-1.54887
AT1G33610	1.509	10.8515	12.9738	9.01412	11.7012	9.69125	3.38132	3.38474	3.02062	0	0.000332758	0.0093339	DOWN	-1.73329
AT1G33615	0.546	6.00619	5.80361	7.89099	6.18889	5.0959	3.17044	2.99392	2.46089	0	0.000942741	0.0150355	DOWN	-1.10799
AT1G33750	1.94	0.978059	0.597099	2.12693	0.848832	1.76312	6.21936	5.66226	5.81586	0	1.15873e-05	0.00207116	UP	2.22387
AT1G33800	1.216	4.95176	3.45616	6.60462	4.9707	4.65558	13.42	16.1788	12.2499	0	0.00743705	0.0464785	UP	1.50121
AT1G33870	0.759	0.0144504	0.0126131	0.0171496	0.0125411	0.0488777	0.076878	0.0586618	0.0762324	0	0.0018868	0.0216101	UP	1.74043
AT1G33970	1.547	80.6316	77.7191	80.3796	81.6195	59.8031	38.0327	37.6251	33.3166	0	0.000280399	0.00848876	DOWN	-1.06563
AT1G34040	1.374	0.917977	1.03816	0.994715	1.3232	1.56061	2.72264	3.03217	2.6062	0	0.000216805	0.00752636	UP	1.256
AT1G34120	2.01	6.02958	6.06311	6.27515	6.76727	5.80651	13.028	13.2687	12.3621	0	8.48598e-05	0.00500285	UP	1.05822
AT1G34510	1.208	0.953329	0.62607	0.786597	1.2056	0.399235	2.9787	3.0908	2.65566	0	5.44351e-05	0.00406497	UP	1.87271
AT1G34670	1.098	1.24861	0.845731	1.07879	1.32637	1.97992	2.76931	3.15714	2.59382	0	0.00103082	0.0157884	UP	1.132
AT1G35250	0.686	1.29503	2.33053	0.740008	3.26078	3.77471	7.64585	8.9846	7.6941	0	0.000197533	0.00720728	UP	1.83021
AT1G35260	0.767	6.47774	7.75103	7.45016	8.74925	10.8247	18.6217	19.9775	17.0404	0	0.000322977	0.00920553	UP	1.16858
AT1G35320	1.348	11.5943	7.62031	11.3847	7.23788	9.78093	27.5351	25.3245	30.051	0	0.000499474	0.0112045	UP	1.53701
AT1G35610	1.839	0.0298201	0.0468515	0.00707806	0.0465841	0.020173	0.0881373	0.114138	0.0943889	0	0.00125739	0.0175982	UP	1.71597
AT1G35730	1.695	0.110002	0.0508318	0.00767939	0.129162	0.0393963	0.202725	0.228907	0.193437	0	0.00186742	0.0215276	UP	1.62793
AT1G36675	0.807	0.095136	0.0118629	0.0806478	0.0117952	0.0459705	1.13278	1.19015	1.02767	0	0.000647146	0.0124838	UP	4.50811
AT1G37130	3.13	526.221	531.014	396.739	403.742	445.389	205.929	179.323	205.375	0	0.0004548	0.0108622	DOWN	-1.2263
AT1G37150	1.328	1.69308	1.46339	2.20537	1.75608	1.69288	0.92271	0.838184	0.479265	0	0.00272732	0.0263965	DOWN	-1.23871
AT1G42470	3.899	13.7752	17.5384	11.6678	16.5106	15.5947	33.1751	31.1505	29.2624	0	0.000129157	0.00603641	UP	1.05473
AT1G42550	2.867	65.6119	58.6788	54.5406	56.2655	54.013	34.7642	24.8501	21.7175	0	0.00516344	0.0376627	DOWN	-1.09276
AT1G43020	1.782	0.658562	0.284729	0.562444	0.400618	0.60373	1.64813	2.19516	1.72088	0	0.00773888	0.0476295	UP	1.8854
AT1G43140	2.166	0.096209	0.0751369	0.198313	0.153811	0.140446	0.434021	0.472788	0.436312	0	1.97239e-05	0.00242784	UP	1.75348
AT1G43765	0.406	1.80996	2.19291	2.14805	3.58709	3.30777	4.90246	4.84096	6.19141	0	0.00659833	0.0432475	UP	1.02557
AT1G43800	1.401	5.91057	1.83813	14.2058	0.414447	4.17851	48.9192	40.5291	40.4137	0	0.000206278	0.00738208	UP	3.0273
AT1G44608	0.661	0.713489	0.767604	0.728612	0.532816	0.909214	1.46146	1.7802	1.42973	0	0.00607088	0.041255	UP	1.09224
AT1G44970	1.286	0.776106	0.692317	1.26522	1.04365	0.963514	3.93742	5.22797	4.51425	0	0.0070829	0.0452326	UP	2.26579
AT1G45231	1.799	6.1393	6.13566	7.11244	5.65619	6.50404	25.9443	23.9115	24.2613	0.00407332	0.000278926	0.00846706	UP	1.96924
AT1G47480	1.125	1.64761	2.66351	1.9091	2.37756	2.51278	6.20675	5.81784	5.76604	0	4.2881e-06	0.00175728	UP	1.41615
AT1G47620	1.761	0.00622818	0.0706719	0.155223	0.113511	0.172746	0.298213	0.33591	0.317613	0	0.00118996	0.0170304	UP	1.61352
AT1G47655	0.942	4.1566	5.55904	4.18685	5.76982	6.08851	2.31942	1.9514	2.27265	0	0.00128372	0.0178256	DOWN	-1.24008
AT1G47760	0.555	0.849759	1.67318	0.727051	1.45782	1.59088	2.46485	2.89952	3.16234	0	0.00220819	0.0235046	UP	1.17391
AT1G47840	1.653	1.14787	0.712353	0.921317	0.892557	1.17152	3.12598	2.54348	2.58635	0	0.00388789	0.032061	UP	1.50569
AT1G47960	1.528	34.719	33.8505	40.4891	48.1839	27.2154	18.1812	17.9619	16.8759	0.05583	0.00520972	0.0377545	DOWN	-1.06174
AT1G48500	1.579	0.257004	0.200076	0.25555	0.271274	0.530981	0.866366	0.882188	0.793946	0	0.000253047	0.00806774	UP	1.48401
AT1G48510	1.479	0.0667413	0.0970926	0.167217	0.173769	0.346149	3.16059	3.11795	3.56873	0	0.000809619	0.0139592	UP	4.26951
AT1G48640	1.362	0.0724746	0.147606	0.353607	0.230629	0.0926092	0.661666	0.611777	0.599467	0	0.000470251	0.0109359	UP	1.79919
AT1G48670	1.578	0.173762	0.151669	0.371195	0.126675	0.249202	0.669702	0.777946	0.558152	0	0.00437786	0.0342284	UP	1.64016
AT1G49032	0.738	86.2416	63.6536	91.3099	93.6521	61.9409	29.7902	41.7232	32.0837	0	0.00144766	0.0188921	DOWN	-1.20046
AT1G49120	0.99	0.0110786	0.00967003	0.013148	0.00961484	0.00749458	0.0327443	0.0321243	0.0324693	0	1.08737e-05	0.00207613	UP	1.6693
AT1G49390	1.152	0.295355	0.174514	0.37287	0.338773	0.418643	1.26628	1.41899	1.56817	0.000748719	0.00160268	0.0198806	UP	2.14739
AT1G49500	0.99	177.579	241.006	141.986	246.053	263.802	52.1355	74.3421	77.3095	0	0.00208961	0.0227615	DOWN	-1.65608
AT1G49640	1.192	0.414054	0.200783	0.753475	0.0399274	0.0186736	1.06062	0.95516	0.738895	0	0.00893291	0.0518806	UP	1.68595
AT1G49840	1.859	13.8706	14.548	12.7085	10.9626	9.25558	6.35085	5.69	5.85486	0	0.00235731	0.0244189	DOWN	-1.04037
AT1G49960	1.829	0.577398	0.370889	0.858864	0.867402	0.707077	1.77292	1.90218	1.74958	0.0704239	5.85093e-05	0.00422827	UP	1.41878
AT1G50090	1.104	0.188758	0.00867149	0.176855	0.008622	0.00672068	0.264268	0.374493	0.331928	0	0.00376929	0.0315005	UP	2.05388
AT1G50580	1.347	0.0732817	0.0355357	0.125624	0.176665	0.269905	0.755672	0.514705	0.672962	0	0.00570679	0.039803	UP	2.24975
AT1G50600	2.06	36.2098	44.0698	33.306	45.5095	46.1062	18.3706	20.7029	18.4535	0	0.000697314	0.0129748	DOWN	-1.09776
AT1G50740	0.788	31.8874	41.6829	39.2975	35.1878	27.0892	14.8838	14.9248	13.0129	0	0.000952231	0.0151152	DOWN	-1.29517
AT1G51190	2.136	0.159177	0.138939	0.152347	0.129233	0.267468	0.749716	0.604497	0.791577	0	0.00399284	0.0324566	UP	2.07776
AT1G51420	1.356	1.49635	0.938977	1.44948	1.43904	2.56623	3.07434	3.63531	2.93474	0	0.00318476	0.028715	UP	1.02662
AT1G51700	1.12	31.6794	32.2843	35.2493	24.2812	18.5292	7.11435	6.18456	5.80326	0	0.00179737	0.0209645	DOWN	-2.15735
AT1G51790	2.96	0.455758	0.656549	0.505711	0.459856	0.764523	2.05234	2.25415	2.50424	0	0.00153491	0.0194272	UP	1.99767
AT1G51830	2.082	5.84213	6.72708	7.08346	8.69118	9.1409	14.5518	18.0584	15.2263	0.00101351	0.00446297	0.034636	UP	1.08877
AT1G51850	2.715	1.50681	1.78067	1.79787	2.16318	2.57706	4.87835	5.74681	6.25844	0.000917046	0.00436744	0.0342266	UP	1.51797
AT1G51860	2.673	1.25147	1.32157	0.978798	1.25705	1.76817	5.4016	6.40345	6.09221	0	0.00110177	0.0163389	UP	2.18119
AT1G52120	1.573	0.062753	0.0304302	0.140675	0.0060513	0.00471687	0.531695	0.489278	0.502707	0	6.844e-06	0.00199988	UP	3.37588
AT1G52330	0.972	1.00879	0.763048	1.7074	1.15394	0.930701	2.38197	2.49841	2.28759	0.0115391	0.000700281	0.0129869	UP	1.10244
AT1G52342	0.515	106.462	72.3669	90.0038	67.5919	49.6611	23.1765	19.8476	19.137	0	0.0040889	0.0328953	DOWN	-1.89787
AT1G52430	3.411	0.146232	0.136521	0.123408	0.199527	0.161554	0.378704	0.321324	0.4148	0.042735	0.0057602	0.0400094	UP	1.27603
AT1G52450	3.411	0.458268	0.520224	0.77718	0.593	0.595418	2.16067	1.99468	2.37095	0.042735	0.000971899	0.0152901	UP	1.88541
AT1G52827	0.331	9.57614	11.2508	6.01672	10.3239	11.7235	19.0192	22.0027	23.5986	0	0.00177142	0.0208208	UP	1.13939
AT1G53100	1.531	2.51462	3.98546	2.66618	3.49153	3.47225	0.531686	0.68763	0.723055	0.00829916	0.000534111	0.0114759	DOWN	-2.31689
AT1G53110	2.038	11.393	8.08425	9.58678	7.92602	7.18299	4.42511	4.43495	4.2113	0	0.00377714	0.0315346	DOWN	-1.01979
AT1G53130	0.822	0.309538	0.152015	0.270049	0.128249	0.58842	1.57445	1.73258	1.24616	0.00895535	0.00340752	0.0297573	UP	2.38951
AT1G53170	0.916	33.9212	30.7998	45.4585	47.396	38.2889	8.99604	10.1589	5.52355	0	0.000231489	0.00773257	DOWN	-2.25156
AT1G53660	0.999	0.0988092	0.182075	0.299681	0.0476411	0.259947	0.590578	0.46479	0.431169	0	0.00476739	0.0359765	UP	1.48004
AT1G53830	1.948	2.83204	2.77666	2.43893	2.06694	3.65268	4.96238	6.36388	6.26062	0	0.00659931	0.0432372	UP	1.09022
AT1G53920	1.171	7.53979	6.18874	10.2154	5.66569	3.47855	21.0779	19.864	15.1912	0	0.00646667	0.0427852	UP	1.4995
AT1G53940	1.311	0.075294	0.328604	0.208503	0.239601	0.59425	1.94353	2.26576	1.85855	0	0.000354784	0.00961465	UP	2.80583
AT1G53980	0.276	0.0397385	0.589662	0.424453	0.51732	0.564537	1.15103	0.944874	1.28113	0	0.00333939	0.0294609	UP	1.39801
AT1G53990	1.104	0.168889	1.10128	0.483405	1.07775	1.41806	2.8952	2.4947	2.00904	0	0.00558914	0.039383	UP	1.53703
AT1G54000	1.609	2.51531	6.4913	6.44761	6.18212	11.699	51.1135	44.3109	45.5539	0	9.96603e-05	0.00534981	UP	2.81732
AT1G54010	1.419	38.2212	48.2175	52.0204	38.9803	32.8524	98.8955	92.5584	80.8849	0	0.00190836	0.0217017	UP	1.10998
AT1G54385	2.108	3.78255	3.44694	3.05654	2.47901	3.55847	7.18769	8.10164	8.20695	0	0.000323351	0.00920837	UP	1.26245
AT1G54390	1.538	20.3026	16.4514	20.5404	17.2859	18.6842	42.8164	36.8444	38.6028	0	0.0021937	0.023432	UP	1.07957
AT1G54450	1.838	1.25909	1.25526	1.55094	1.10309	1.34425	3.94717	3.94857	3.30541	0	0.00385619	0.0318935	UP	1.5193
AT1G54740	1.218	60.8633	61.6136	49.1701	74.7819	77.0899	17.1772	19.2333	19.9466	0	0.000700711	0.0129805	DOWN	-1.78421
AT1G54890	1.131	0.61094	0.347044	1.02429	0.244069	0.688825	1.88597	1.98523	1.42676	0	0.00423606	0.0336204	UP	1.59882
AT1G55210	0.919	20.0858	21.0947	22.6196	14.3868	11.7471	40.5864	33.7687	35.2927	0	0.00112083	0.0164761	UP	1.0229
AT1G55450	1.387	54.0642	118.642	85.5039	96.5114	75.7102	18.4311	23.1266	19.0828	0	0.00327661	0.0291907	DOWN	-2.09046
AT1G55525	0.321	0.44418	0.268411	0.44605	0.622718	0.346712	1.07046	0.812415	1.02142	0	0.00460622	0.035235	UP	1.18561
AT1G55690	2.756	8.78302	8.29851	8.89339	7.4844	10.0876	22.0872	22.7861	25.6434	0	0.00199206	0.0222174	UP	1.43236
AT1G55800	0.945	0.684764	0.739527	0.785126	0.856179	0.384722	0.322454	0.343271	0.292533	0	0.00949229	0.0537182	DOWN	-1.11128
AT1G55940	2.052	0.368801	0.312579	0.475751	0.598397	0.654461	1.62716	1.88153	1.41925	0	0.00449038	0.0347924	UP	1.76892
AT1G56120	3.144	0.854681	0.831272	0.799044	0.959741	0.672581	1.87036	1.57599	1.52339	0	0.00756666	0.0469739	UP	1.00843
AT1G56520	3.698	8.59216	9.51379	10.0211	7.44146	5.26678	4.90724	3.97152	3.31877	0	0.00599835	0.0408861	DOWN	-1.00626
AT1G56680	0.933	0.481973	0.625909	0.599906	0.49991	1.24853	3.62041	2.78831	3.68647	0	0.00368017	0.0310257	UP	2.28336
AT1G56710	1.514	2.25297	1.35949	2.65662	1.6791	1.18106	5.28085	4.59191	4.33696	0.000338836	0.000577668	0.0118655	UP	1.37528
AT1G57560	1.073	1.03239	0.472867	1.39506	1.10889	0.532443	2.55589	2.89873	2.13898	0	0.00315856	0.0285861	UP	1.47853
AT1G58007	0.795	0.20694	0.25288	0.114611	0.395115	0.270653	0.888916	0.680066	0.73589	0	0.00228436	0.0239512	UP	1.63108
AT1G58170	0.709	3.91377	2.17392	3.54329	1.49023	1.47555	4.70936	5.64292	5.25014	0	0.00417955	0.0333293	UP	1.04568
AT1G58370	2.903	1.66614	1.21027	1.3855	0.823008	1.55651	3.50857	4.14328	3.57655	0	0.000537161	0.0114827	UP	1.49455
AT1G59620	2.808	11.417	13.1838	13.8092	14.6746	11.4016	4.89255	3.96633	2.96949	0	5.56407e-05	0.00410033	DOWN	-1.70978
AT1G59725	0.996	0.319344	0.1634	0.535822	0.353606	0.230932	0.722545	0.721636	0.561563	0	0.00610242	0.0413606	UP	1.06023
AT1G59780	2.721	0.0927086	0.0457381	0.0526211	0.0734629	0.100892	0.488457	0.572713	0.441827	0	0.00495429	0.0367515	UP	2.77717
AT1G59850	1.497	1.16774	0.67964	1.07658	1.22205	0.892453	3.06548	2.6946	2.71057	0.340704	0.000147062	0.00632764	UP	1.48645
AT1G59890	4.199	11.2656	11.11	10.9086	10.7519	12.0421	31.6233	31.2669	30.188	0	2.37438e-05	0.00268648	UP	1.46797
AT1G59910	3.006	15.3353	23.0161	18.91	16.197	14.2888	5.40713	5.54597	5.72958	0	0.00153386	0.0194212	DOWN	-1.65804
AT1G60080	1.441	7.28398	5.37462	7.86775	4.94761	6.21478	15.4728	12.4696	15.2537	0	0.00374352	0.0314415	UP	1.1839
AT1G60130	1.803	0.103413	0.292032	0.223801	0.258689	0.234564	0.557362	0.497419	0.445711	0	0.0013776	0.0184067	UP	1.1686
AT1G60390	2.092	1.25302	1.80758	1.57418	1.50606	1.67048	6.43689	6.37582	5.8727	0	0.000140187	0.00622305	UP	1.99524
AT1G60680	1.304	4.8587	5.60157	5.30045	7.30691	10.5493	23.6878	23.1841	22.3386	0.00115502	2.59061e-05	0.00279919	UP	1.77877
AT1G60989	0.477	9.08802	16.0056	7.41494	17.9085	11.998	24.5585	27.4234	25.2829	0.438545	0.00140557	0.0185882	UP	1.04488
AT1G61275	0.175	0.0626733	1.47703	0.371902	1.68617	0.890356	3.22316	3.74368	3.34304	0	0.000471049	0.0109393	UP	1.93681
AT1G61390	2.862	0.356397	0.0970044	0.14099	0.156317	0.14777	0.459862	0.544497	0.487449	0	0.00101359	0.0156457	UP	1.46847
AT1G61400	2.502	1.7929	1.22058	1.85728	1.34296	1.21881	3.6252	3.78027	4.11893	0	6.42926e-05	0.00440916	UP	1.36973
AT1G61480	2.605	0.248408	0.510823	0.244841	0.427519	0.635155	0.993039	1.0719	0.955085	0	0.000621131	0.0122707	UP	1.28417
AT1G61860	1.392	0.449114	0.323237	0.551708	0.553889	0.250519	1.15974	1.03726	0.863657	0	0.00481716	0.0361976	UP	1.26099
AT1G61930	0.876	0.262927	0.71035	0.549786	0.315116	0.821581	1.82808	1.67729	1.34303	0	0.00312451	0.0283619	UP	1.60318
AT1G62130	3.157	5.99287	4.64869	6.43613	4.81513	5.07882	12.6238	12.2437	11.7847	0	3.71667e-06	0.00158095	UP	1.17942
AT1G62190	1.032	0.0106277	0.00927648	0.0630647	0.00922354	0.00718957	0.1068	0.104778	0.130821	0	0.000474646	0.0109622	UP	2.52159
AT1G62410	0.672	0.146891	0.014246	0.213069	0.0141647	0.0110411	0.337676	0.444865	0.507044	0	0.00355039	0.0303735	UP	2.42793
AT1G62800	1.496	5.35655	6.96005	7.50312	6.4582	5.70362	18.2669	17.4033	16.95	0.0022306	2.68249e-06	0.00152784	UP	1.45534
AT1G62990	1.319	1.97072	2.95401	2.35857	2.98045	2.97573	5.86404	5.61798	4.94721	0	0.000918733	0.0148286	UP	1.04838
AT1G63180	1.425	21.851	15.539	21.1097	22.3305	16.823	7.55712	8.44065	6.36577	0	0.000401838	0.0102922	DOWN	-1.38955
AT1G63220	0.75	5.6594	6.54816	7.37605	7.52611	9.09153	16.0874	17.2585	18.7982	0	0.000417305	0.0104728	UP	1.26343
AT1G63295	0.748	2.36072	2.6493	2.31444	2.76144	3.442	7.02944	8.69908	9.32539	0	0.00954735	0.0539299	UP	1.62606
AT1G63410	0.627	0.437314	0.412249	0.394441	0.592072	0.769181	1.45798	1.51153	1.69182	0	9.91781e-05	0.00534957	UP	1.57629
AT1G63720	1.524	9.7084	7.18	12.1539	7.88852	6.73317	2.84605	3.48498	2.26531	0	0.00273458	0.0264287	DOWN	-1.60768
AT1G63750	4.34	4.77884	8.41527	7.70496	6.09065	3.77991	2.11382	2.05621	2.49602	0.0031746	0.00985426	0.0549888	DOWN	-1.46964
AT1G63930	1.443	0.0988092	0.218933	0.18943	0.323227	0.16968	0.624525	0.6127	0.539086	0	0.000132316	0.00605768	UP	1.56574
AT1G63990	1.656	0.0202458	0.184454	0.0725545	0.136736	0.301152	0.426939	0.378227	0.365912	0.0374798	0.00487491	0.0364522	UP	1.4485
AT1G64065	1.177	6.56951	5.97825	9.27858	6.94695	6.48666	1.41566	1.65906	1.72057	0	0.00057987	0.0118456	DOWN	-2.14138
AT1G64170	2.436	0.913985	3.23434	1.45875	3.05958	3.41437	8.4236	7.47033	8.10478	0	9.87146e-05	0.00535033	UP	1.72718
AT1G64210	1.764	0.87668	0.721799	0.641973	0.933522	0.963206	2.44413	2.15987	2.08831	0	0.000902772	0.0146767	UP	1.43082
AT1G64405	0.605	1.61345	0.90195	0.666964	0.708002	0.895262	3.58997	4.32101	4.38867	0	0.00066394	0.0126265	UP	2.0988
AT1G64480	0.645	0.595153	0.905385	1.1503	1.01828	1.32288	4.35241	3.52053	3.73775	0	0.00193714	0.0218662	UP	1.95473
AT1G64600	1.734	4.98213	4.66941	6.43395	3.6727	5.06473	12.4216	11.1124	14.1218	0.00606053	0.00411545	0.0330377	UP	1.33816
AT1G64660	1.628	89.0563	77.945	89.8127	143.757	117.05	27.8013	25.251	12.9573	0.000666315	0.00136125	0.018334	DOWN	-2.23418
AT1G64910	1.611	0.00680809	0.00594248	0.0080798	0.00590856	0.023028	0.03622	0.0355342	0.0359158	0	0.00137174	0.0183722	UP	1.85032
AT1G65110	3.285	0.263762	0.0961704	0.11491	0.165165	0.142294	0.720375	0.625412	0.71824	0	5.40014e-05	0.00406875	UP	2.13663
AT1G65140	0.957	0.0114606	0.0500174	0.0136014	0.00994639	0.023259	0.11517	0.0996962	0.100767	0	8.82629e-05	0.00505279	UP	2.28038
AT1G65190	1.685	20.0025	22.2204	16.6473	15.9586	13.8661	9.66158	7.07784	7.87878	0	0.00161296	0.0199052	DOWN	-1.11216
AT1G65200	3.306	0.0165878	0.00289574	0.00393725	0.0201545	0.0112215	0.0333386	0.0442511	0.0408371	0	0.00121921	0.017287	UP	1.8488
AT1G65240	1.524	0.0650863	0.321634	0.197193	0.181605	0.0635025	0.431421	0.46475	0.393862	0.00545282	0.00341322	0.029784	UP	1.37489
AT1G65484	0.636	0.120715	0.285996	0.143264	0.194564	0.198324	0.621833	0.490048	0.697478	0	0.00925785	0.0530436	UP	1.67732
AT1G65800	2.781	16.7053	21.3048	17.0156	15.1663	10.276	9.50296	6.61297	5.66547	0.0353267	0.00595345	0.0407122	DOWN	-1.14835
AT1G65985	1.456	1.09226	1.51885	1.38569	1.19637	2.09442	3.56675	4.06713	3.81938	0	5.38088e-05	0.0040725	UP	1.38921
AT1G66020	2.008	0.169324	0.328964	0.291706	0.459817	0.48405	0.881455	0.731724	0.874053	0	0.000780357	0.0136721	UP	1.25752
AT1G66050	2.05	0.452517	0.873772	0.639547	1.08986	1.64031	1.85672	2.26681	2.19884	0.401772	0.00301205	0.0278757	UP	1.166
AT1G66090	1.555	5.49449	7.67713	9.03207	3.85033	3.37343	0.312703	0.421314	0.442377	0	0.0072238	0.0457843	DOWN	-3.90775
AT1G66270	1.741	10.9678	11.8608	27.4462	13.991	16.48	72.8514	57.644	57.8234	0.000194204	0.00249204	0.0251705	UP	1.95868
AT1G66360	0.806	0.0136077	0.0118776	0.0807479	0.0118098	0.0092055	0.104571	0.102591	0.103692	0	0.00480871	0.0361746	UP	2.02555
AT1G66450	2.103	0.224259	0.113806	0.25377	0.239891	0.059978	0.71832	0.559541	0.553322	0	0.00278136	0.0266737	UP	1.7751
AT1G66470	1.399	0.6507	0.567967	0.846681	0.823275	0.641727	1.6081	1.50491	1.41997	0	9.28183e-05	0.00518979	UP	1.09761
AT1G66480	0.965	2.44361	3.54164	2.54936	3.02823	2.40658	5.71747	5.63557	5.72275	0	0.000155114	0.00646707	UP	1.02665
AT1G66760	1.922	46.8558	87.978	50.3528	68.389	59.8242	26.8746	21.5341	19.8119	0	0.00427789	0.0338086	DOWN	-1.46276
AT1G66800	1.128	0.340314	1.29851	0.70391	1.35861	3.03232	5.83389	4.0205	5.22636	0	0.00388163	0.0320172	UP	1.90021
AT1G66890	0.557	29.7529	28.6512	29.001	39.8008	36.885	16.0047	17.8486	13.1002	0	0.000759071	0.0134819	DOWN	-1.06822
AT1G66950	4.557	0.0264749	0.115544	0.0771225	0.0396873	0.0309355	0.334341	0.311261	0.308961	0	1.81485e-05	0.00237301	UP	2.45693
AT1G67000	2.83	0.0426311	0.0304452	0.0689924	0.0437254	0.0655445	0.103093	0.110131	0.09314	0	0.00109652	0.0162897	UP	1.02258
AT1G67030	0.97	5.00902	4.53006	5.11269	5.19112	7.38139	11.2223	12.0589	11.0087	0	5.68525e-05	0.00417133	UP	1.06986
AT1G67050	1.162	20.5859	28.547	17.7773	21.8471	22.9549	8.45294	11.7743	11.3696	0	0.00133713	0.0182062	DOWN	-1.08497
AT1G67070	1.75	3.51597	3.20023	3.33968	3.23635	3.85397	1.61158	1.79188	1.50253	0	1.79044e-05	0.00235023	DOWN	-1.06831
AT1G67150	1.456	0.00753285	0.0328754	0.0804595	0.0849883	0.0458631	0.663477	0.6946	0.560765	0	0.00191816	0.0217469	UP	3.66731
AT1G67180	1.45	1.35396	1.74961	1.33756	1.47704	1.51975	3.10755	3.55756	3.47162	0	0.000902318	0.0146764	UP	1.18359
AT1G67220	4.212	0.00260395	0.00227287	0.0216325	0.0293787	0.0229001	0.0569527	0.0528541	0.0625798	0	0.000752069	0.0134787	UP	1.86657
AT1G67265	0.645	13.3824	9.66238	14.2678	21.738	13.3093	0.894606	4.03332	2.32239	0	0.0020965	0.0227922	DOWN	-2.58211
AT1G67470	1.395	5.49571	7.52827	6.70889	4.85146	3.55823	1.67778	1.08062	1.90333	0	0.00283183	0.0268892	DOWN	-1.85685
AT1G67750	1.637	6.97465	4.69602	6.7667	3.69235	4.23785	14.9193	13.0515	11.3773	0	0.00379278	0.0316102	UP	1.31449
AT1G67760	0.697	0.550752	0.508197	0.317477	0.45067	0.479029	2.22314	1.98028	2.31515	0	0.00105942	0.0160003	UP	2.23605
AT1G67865	0.449	124.945	259.631	141.849	143.459	220.292	55.8957	47.9242	60.6095	0	0.00879876	0.0514304	DOWN	-1.69966
AT1G67920	0.597	16.9974	12.2928	21.3922	22.1636	19.71	6.33919	5.27376	5.09635	0.0174796	0.0015118	0.0192652	DOWN	-1.73271
AT1G67940	1.063	6.34147	5.55512	6.04706	5.88525	5.24359	13.3542	11.095	12.0629	0.0539508	0.00661274	0.043283	UP	1.06568
AT1G67970	1.419	30.5383	20.2059	24.8865	22.2505	17.9086	4.89337	4.89037	5.05163	0	0.00110655	0.0163808	DOWN	-2.22743
AT1G68020	2.996	28.1019	30.7103	28.9823	43.5281	43.1668	14.5034	17.247	13.5098	0.00135796	0.00332885	0.0294298	DOWN	-1.20986
AT1G43590	0.507	4.34819	3.75758	3.97942	5.57604	2.64882	0.549872	1.59329	0.621336	0	0.00164607	0.0201144	DOWN	-2.14014
AT1G68180	0.941	0.128211	0.132256	0.15216	0.0303465	0.118273	0.227366	0.277136	0.225457	0	0.00301644	0.0279011	UP	1.11615
AT1G68190	1.34	74.2456	58.9474	65.0925	87.7495	75.9184	33.4184	39.9342	22.957	0	0.00178377	0.0208565	DOWN	-1.17309
AT1G68280	0.567	0.0193436	0.0844209	0.0229569	0.117515	0.0130858	0.148649	0.16827	0.170078	0	0.00448653	0.0347786	UP	1.6573
AT1G68500	0.509	14.2	12.1312	11.0219	15.0167	14.6789	6.33053	7.13539	4.93853	0	0.000399885	0.0102735	DOWN	-1.12819
AT1G68540	1.136	7.40521	9.90199	7.23015	9.12487	9.82971	22.0241	20.98	19.1679	0	0.000316893	0.0091016	UP	1.25248
AT1G68670	1.583	82.9966	97.9286	91.0172	92.1383	99.7268	26.3308	30.4771	24.1359	0	1.59097e-06	0.00124333	DOWN	-1.78157
AT1G68795	0.798	1.85546	1.28364	1.94107	0.990039	1.10644	5.06158	4.31215	3.69784	0	0.00688838	0.0443953	UP	1.60202
AT1G68840	1.671	214.65	189.96	258.049	215.204	102.538	52.4606	85.9997	71.6339	0	0.00597681	0.0408138	DOWN	-1.48537
AT1G68850	1.271	1.47561	0.911387	0.890984	1.52029	2.28252	3.82065	5.3197	4.3652	0	0.00621437	0.0418325	UP	1.66854
AT1G69252	0.981	107.386	117.72	103.774	167.077	132.759	66.6248	66.4137	55.5536	0	0.00397068	0.0323704	DOWN	-1.00018
AT1G69270	2.014	19.7955	14.1006	19.6025	26.8737	27.2585	5.5122	5.36409	4.31619	0.0039616	0.00239421	0.0245814	DOWN	-2.0877
AT1G69430	1.602	1.64997	1.79873	1.50316	2.04991	2.17217	0.441129	0.345427	0.517685	0	0.000115216	0.00573588	DOWN	-2.07736
AT1G69480	2.484	4.83485	5.36091	5.89518	5.81315	4.81201	2.92587	1.73867	1.483	0	0.00638258	0.0424629	DOWN	-1.38266
AT1G69490	1.1	54.4702	32.6799	72.8336	67.9375	49.8262	11.7349	14.1264	3.53591	0	0.00161402	0.0199037	DOWN	-2.50306
AT1G69520	0.794	2.3603	1.49238	2.14329	1.27096	1.22137	4.36556	4.68518	5.68115	0.0477735	0.00386325	0.0319126	UP	1.53236
AT1G69523	1.314	10.3568	11.4341	8.19022	7.65517	7.21737	37.3491	29.5666	28.7926	0.0360732	0.00905294	0.0523246	UP	1.83038
AT1G69810	1.166	2.68082	2.98038	2.66806	3.09398	3.59528	7.08946	7.34799	5.8941	0	0.00708362	0.0452286	UP	1.17394
AT1G69840	1.891	63.0519	62.7607	74.4305	44.8551	39.6015	10.7348	13.2493	13.9628	0	0.00204686	0.0225517	DOWN	-2.17042
AT1G69880	0.707	6.62413	1.77384	7.64055	1.8445	2.44523	24.8239	21.9428	20.287	0	0.000143478	0.00626162	UP	2.4588
AT1G69890	1.244	80.416	75.363	89.1802	82.9366	67.5223	10.6684	12.2969	11.2093	0	3.9968e-05	0.00352516	DOWN	-2.79542
AT1G69910	2.153	9.77578	9.78676	10.8522	10.5621	11.8239	4.64045	5.59841	5.34201	0	2.9911e-05	0.00299145	DOWN	-1.02381
AT1G70020	0.884	2.22086	2.63158	2.22342	3.32723	2.3585	1.09279	1.30234	0.996339	0	0.00123281	0.01737	DOWN	-1.17486
AT1G70130	1.971	0.183632	0.121427	0.165101	0.0241469	0.0037644	0.312492	0.22267	0.29682	0	0.00828423	0.0496138	UP	1.47717
AT1G70290	3.019	157.397	178.989	152.28	193.87	184.385	45.1861	55.775	43.7376	0	1.64194e-05	0.00223383	DOWN	-1.84588
AT1G70360	0.525	11.3439	9.50039	11.6777	11.6581	10.2179	5.17435	4.88253	5.4003	0	7.16018e-05	0.00460059	DOWN	-1.07831
AT1G70420	1.189	23.3654	22.0533	18.972	26.0583	29.5475	10.4094	9.64524	8.14836	0	0.000626512	0.0123407	DOWN	-1.35211
AT1G70500	1.407	1.02117	0.796076	0.952882	0.845655	0.806826	2.01367	2.57228	2.37144	0	0.00885286	0.0516209	UP	1.39061
AT1G70520	2.194	22.1252	38.3177	22.399	29.8395	24.296	10.5894	12.9923	13.0872	0.00181722	0.00633258	0.0423146	DOWN	-1.16434
AT1G70530	1.941	36.9154	57.4449	36.2063	50.4574	37.4575	15.6289	17.6269	14.7425	0	0.00257766	0.0256575	DOWN	-1.44949
AT1G70740	1.833	12.3919	14.4409	15.9423	10.6923	7.75965	5.43642	5.12528	5.39076	0	0.00829949	0.0496787	DOWN	-1.20343
AT1G70990	0.78	0.520269	0.355931	0.517325	0.3539	0.618303	1.38811	1.60646	1.55778	0	0.000142398	0.0062715	UP	1.68129
AT1G71015	0.84	0.248082	0.672412	0.201447	0.691238	0.82146	1.30439	1.50686	1.10976	0	0.00442527	0.0344788	UP	1.31059
AT1G71140	1.543	4.44257	7.87333	6.60529	5.01536	6.15017	2.29838	2.2054	2.12076	0	0.00311811	0.0283575	DOWN	-1.44627
AT1G71200	0.705	2.62917	3.95154	5.37279	3.09189	2.09434	17.7396	17.0789	13.7971	0	0.00280228	0.0267675	UP	2.24104
AT1G71250	1.276	0.0793262	0.0693834	0.0951931	0.100116	0.14896	0.00508102	0.00498481	0.00503835	0.0398094	0.00242985	0.0248034	DOWN	-4.29154
AT1G71400	2.763	1.21865	1.39633	1.70068	2.24273	1.83947	7.59562	7.32288	7.50856	0	3.85094e-07	0.000718929	UP	2.15411
AT1G71760	1.013	0.460139	0.633182	0.365792	0.291293	0.733343	1.15156	1.38392	1.23349	0.0920375	0.000430309	0.0106324	UP	1.33861
AT1G71890	1.804	0.370863	0.281256	0.252539	0.216334	0.333143	0.779874	0.842676	0.987147	0	0.00407754	0.032851	UP	1.58069
AT1G71920	1.616	0.226254	0.243326	0.111849	0.188943	0.14641	0.580109	0.579105	0.59593	0.315675	4.62028e-05	0.00383358	UP	1.67391
AT1G72150	2.148	391.528	538.91	366.469	490.075	445.479	134.385	212.361	248.463	0	0.00283533	0.0269072	DOWN	-1.1702
AT1G72360	1.021	1.90138	5.07265	2.58801	2.17224	2.43445	5.96267	7.27017	6.94526	0	0.00137196	0.0183679	UP	1.24705
AT1G72490	1.619	0.562279	0.408005	1.11754	0.27633	0.371211	1.3175	1.09612	1.29849	0	0.00731427	0.0460623	UP	1.17747
AT1G72590	1.046	0.0524275	0.00915232	0.0124441	0.00910009	0.00709334	0.0805773	0.0668899	0.0553158	0	0.00501526	0.0370402	UP	1.90543
AT1G72730	1.667	4.17791	3.46294	4.48981	3.64874	5.17639	8.72358	10.0999	10.8717	0	0.0039233	0.0322107	UP	1.23985
AT1G72930	0.915	122.652	123.252	118.359	82.727	55.4782	21.2436	17.2348	23.0933	0.0164774	0.00384085	0.0318058	DOWN	-2.29173
AT1G72940	1.525	48.5533	37.1194	48.6777	31.5231	24.244	4.62127	4.7006	6.36148	0.000267532	0.00219666	0.0234412	DOWN	-2.86262
AT1G72990	2.545	5.73602	6.3609	5.51861	7.00531	6.57417	16.5613	15.038	14.4064	0	0.00148277	0.0190762	UP	1.29746
AT1G73160	1.461	0.202691	0.111394	0.0801841	0.0846975	0.228531	0.847587	0.683516	0.60285	0	0.00705309	0.045085	UP	2.3297
AT1G73270	1.359	0.556865	0.64104	0.775821	0.98759	0.73705	1.68406	2.15936	1.8686	0.000793659	0.004277	0.0338095	UP	1.36408
AT1G73290	1.32	0.340667	0.282848	0.325414	0.367768	0.522747	1.40964	1.17093	1.31014	0	0.000713884	0.0131018	UP	1.81773
AT1G73500	1.439	51.7447	33.337	50.5375	35.9382	26.3735	8.92534	10.5333	7.9926	0	0.00326841	0.0291562	DOWN	-2.11309
AT1G73620	0.995	5.12567	4.41624	4.95807	4.04664	4.40704	11.5137	10.5797	11.5075	0	0.000107187	0.00551595	UP	1.28674
AT1G73750	1.58	82.0296	65.5531	73.4612	56.8651	37.1123	19.7288	10.4065	8.96388	0.000190523	0.00158136	0.019718	DOWN	-2.27327
AT1G73780	0.297	0.332358	0.547968	0.219134	0.416643	0.574584	1.41892	1.60622	1.53688	0	1.63873e-05	0.00223854	UP	1.86266
AT1G73910	0.438	4.78277	3.51896	4.01195	3.84659	5.60708	1.76147	2.2509	1.95216	0	0.00198147	0.0221287	DOWN	-1.13072
AT1G74030	1.753	4.79881	6.60248	5.04178	6.782	8.79098	16.7281	17.5434	16.3602	0	2.32417e-05	0.00266558	UP	1.39821
AT1G74200	2.45	0.17459	0.293061	0.536601	0.353551	0.40278	1.53219	1.25395	1.23068	0	0.00162197	0.0199578	UP	1.92697
AT1G74210	1.417	5.32299	6.15078	8.50954	6.3309	4.82058	14.8361	12.9572	11.3881	0.0155944	0.00587722	0.0404875	UP	1.06861
AT1G74500	0.558	2.88937	1.87006	3.5224	1.82527	4.614	13.8382	14.6249	13.2381	0	3.25082e-06	0.0015386	UP	2.23917
AT1G74650	1.517	2.75461	1.26845	3.97275	1.62514	1.15917	8.7485	9.68139	7.37823	0	0.00106611	0.0160437	UP	1.99642
AT1G74770	3.904	0.86248	0.801864	0.250062	0.392548	1.19543	3.50574	4.26376	4.89251	0	0.00546119	0.0388727	UP	2.59106
AT1G74950	1.28	52.0543	59.3621	41.1954	38.9597	37.3011	19.7895	19.0868	17.5138	0	0.00283813	0.0269186	DOWN	-1.28406
AT1G75000	0.846	4.18748	3.85875	4.75428	2.59908	2.4469	1.96954	1.39092	1.51224	0	0.00985232	0.0549871	DOWN	-1.13588
AT1G75020	1.97	15.3605	12.9993	14.1596	11.7945	9.70579	3.93281	3.76794	4.10864	0	0.000753966	0.0134767	DOWN	-1.70162
AT1G75163	0.08	9.1357	6.42172	10.3829	5.3522	4.73087	15.4136	21.031	18.2536	0.24014	0.00550291	0.0390538	UP	1.33953
AT1G75166	0.086	11.6519	6.71653	6.38517	6.31082	7.67767	21.5465	27.7711	21.2944	0.227192	0.0072089	0.0457503	UP	1.60298
AT1G75230	1.744	12.8734	14.9364	11.0536	11.1615	11.3294	5.31235	5.43789	5.45206	0	0.000743876	0.0134177	DOWN	-1.184
AT1G75380	1.55	384.433	326.586	372.87	361.606	258.878	170.948	165.397	121.988	0	0.000477437	0.0110115	DOWN	-1.15781
AT1G75430	0.966	0.102185	0.168475	0.175171	0.206928	0.222743	0.355713	0.467499	0.432588	0	0.00467245	0.0355474	UP	1.25739
AT1G75490	1.205	43.3707	22.0624	41.6206	44.2599	29.1428	15.9852	15.1441	7.21854	0	0.004501	0.0348025	DOWN	-1.49747
AT1G76070	1.23	10.0137	8.95846	10.9953	6.9262	6.08651	4.17993	4.43175	3.68487	0	0.00693876	0.0445917	DOWN	-1.06845
AT1G76360	1.888	16.0747	32.6673	19.2406	26.2508	20.148	7.82492	7.33214	6.26947	0.00509378	0.00545819	0.0388678	DOWN	-1.67941
AT1G76410	0.799	22.0592	11.9697	18.3274	24.3388	22.5189	7.87905	6.82234	5.02889	0	0.00238444	0.0245411	DOWN	-1.59317
AT1G76430	1.9	0.0288627	0.0453474	0.171271	0.0851672	0.0976268	0.31052	0.257772	0.206402	0	0.00835589	0.0498475	UP	1.59206
AT1G76590	1.235	49.0666	43.4172	47.6923	67.679	66.5724	7.13434	6.83444	5.83549	0	0.000656536	0.0125854	DOWN	-3.05558
AT1G76600	0.958	25.5191	27.0911	28.737	13.9402	12.0588	1.4415	1.87897	2.65076	0	0.00494121	0.0367274	DOWN	-3.43113
AT1G76610	0.864	2.04377	3.29083	1.82292	1.33306	2.92835	0.577801	0.640479	0.602712	0	0.00960529	0.0541117	DOWN	-1.91167
AT1G77000	1.715	11.7992	11.9067	14.3827	15.8127	12.8448	7.06556	6.46446	4.72704	0	0.000566362	0.0117192	DOWN	-1.13326
AT1G77120	1.456	28.8659	11.9951	31.758	9.33697	14.9332	65.987	62.0893	54.4809	0.0143981	0.000341231	0.0094688	UP	1.65091
AT1G77150	0.237	0.138833	0.0403938	0.0549222	0.0401633	0.0313065	0.793325	0.778303	0.678157	0	0.000299499	0.00878984	UP	3.61695
AT1G77330	1.239	11.7291	7.8271	16.6305	8.27412	11.9109	59.3655	59.0629	50.6272	0	0.000533218	0.0114714	UP	2.32142
AT1G77340	1.486	0.00738077	0.0322117	0.0788351	0.0320279	0.00499302	0.16143	0.11557	0.134116	0	0.00199491	0.0222198	UP	2.14007
AT1G77450	1.117	17.8019	18.3839	13.6225	18.1597	21.7939	9.223	6.90728	5.80733	0	0.000665522	0.0126494	DOWN	-1.29573
AT1G77890	2.275	11.1607	10.0615	13.1882	10.2718	8.63287	5.14395	5.08011	4.43384	0	0.000951886	0.0151168	DOWN	-1.1259
AT1G78030	0.783	0.0140074	0.110038	0.016624	0.158037	0.104235	0.687255	0.706735	0.484428	0	0.00846767	0.0502912	UP	2.95784
AT1G78050	1.553	2.62422	2.37354	1.99507	2.4635	2.68157	5.09653	5.68996	4.67761	0.0212235	0.00490743	0.036614	UP	1.08637
AT1G78090	1.4	0.994938	0.731676	1.16219	0.754696	1.79661	3.35746	3.54832	3.61398	0	7.4101e-05	0.00466309	UP	1.68836
AT1G78206	0.123	0.624185	0.856151	0.74078	0.232163	0.784189	2.16113	1.91336	2.24751	0	9.40102e-05	0.00523901	UP	1.70248
AT1G78340	0.877	2.68881	3.0019	2.12243	4.04843	5.74451	8.28719	9.58082	9.71304	0	0.000352657	0.00958017	UP	1.38457
AT1G78520	0.348	0.283651	0.357624	0.0374039	0.136763	0.106604	1.2855	1.07838	1.08996	0	0.000142783	0.00626383	UP	2.64226
AT1G78860	1.332	1.3751	1.74649	0.986991	0.721763	1.09735	2.46777	2.33509	2.67899	0.000101865	0.000728427	0.0132529	UP	1.07289
AT1G78955	2.31	0.42257	0.476594	0.557853	0.630459	0.6713	1.47911	1.11517	1.3331	0	0.00898508	0.0520936	UP	1.2465
AT1G79110	1.383	7.25637	4.96318	8.32947	3.65468	4.06122	12.3526	12.7074	9.98041	0	0.00365672	0.03089	UP	1.04698
AT1G79250	1.964	0.00558443	0.024372	0.0596482	0.0823919	0.0188891	0.155152	0.158692	0.114569	0	0.00280579	0.0267705	UP	1.90326
AT1G79310	1.41	1.22124	1.88072	2.04018	2.31554	1.97331	4.6947	4.17275	3.63394	0	0.00503392	0.0371372	UP	1.14357
AT1G79330	1.302	0.412768	0.301464	0.509865	0.519068	0.404604	1.2897	1.49978	1.37763	0	0.000286563	0.0085979	UP	1.69317
AT1G79360	1.784	3.67029	3.07484	4.00566	5.89583	4.68718	1.28287	2.0073	2.00724	0	0.0043712	0.03424	DOWN	-1.27282
AT1G79520	1.463	22.7228	25.4874	17.0025	24.8605	31.7528	12.4571	9.59527	12.3174	0	0.00373368	0.0313666	DOWN	-1.08865
AT1G79530	1.745	14.8106	11.5653	15.7359	12.5884	15.4006	34.9288	32.8529	31.9593	0.19974	1.53509e-05	0.00224284	UP	1.24572
AT1G79580	1.662	0.283764	0.339847	0.446416	0.326453	0.40625	1.79054	1.47343	1.70587	0	0.00282881	0.0268909	UP	2.19998
AT1G79810	1.536	10.8746	9.6248	11.0392	11.5717	9.84574	24.1544	21.2375	21.547	0.110374	0.00229659	0.024012	UP	1.07501
AT1G79900	1.455	0.655808	0.776811	0.706741	1.10561	1.19836	0.471072	0.441527	0.3248	0.00908417	0.00969076	0.0544471	DOWN	-1.10736
AT1G80180	0.759	331.217	290.164	325.688	389.288	308.057	131.402	140.78	117.66	0	9.12273e-05	0.00517838	DOWN	-1.33965
AT1G80240	1.316	7.29244	3.8337	9.16896	4.59299	5.17006	13.5432	14.5337	13.3513	0	0.000672153	0.0127179	UP	1.19982
AT1G80310	1.937	24.1943	32.2571	24.773	32.074	29.3604	13.8456	12.1778	11.8984	0.00633737	0.000377776	0.00993332	DOWN	-1.17451
AT1G80440	1.465	244.669	294.029	247.599	323.59	279.946	60.3507	90.5292	79.6441	0	2.77882e-05	0.00288208	DOWN	-1.85496
AT1G80450	0.854	8.07818	10.5262	7.91053	8.39294	8.67941	3.33279	4.53585	4.79535	0	0.000671018	0.0127108	DOWN	-1.04621
AT1G80610	1.18	15.2899	23.2275	22.0068	20.804	22.1017	7.97236	5.93478	5.26845	0	0.000139126	0.00620874	DOWN	-1.69434
AT1G80900	1.614	4.12548	3.36583	4.57188	3.71549	3.41161	8.78974	8.1545	7.81241	0.0134293	0.000144747	0.00627622	UP	1.1044
AT1G80920	0.852	1166.17	884.973	1199.02	1096.19	834.234	321.654	392.765	238.283	0.00113233	0.000186987	0.00707603	DOWN	-1.70605
AT2G01340	0.93	17.6227	21.6716	17.4667	28.6701	21.5774	8.73032	8.50921	6.8897	0.108134	0.00195348	0.0219621	DOWN	-1.41191
AT2G01422	0.795	27.9093	27.9252	15.4725	23.4555	30.3412	10.7567	12.2492	11.475	0	0.0062168	0.0418405	DOWN	-1.12229
AT2G01760	1.405	8.26685	10.6226	9.5146	8.09483	7.98997	25.3377	23.5818	27.2944	0.00153419	0.000901798	0.0146751	UP	1.51357
AT2G01880	1.192	0.892516	1.51792	2.39147	2.00436	2.3591	5.00939	4.81849	4.3309	0	0.000165663	0.00663522	UP	1.3644
AT2G01900	1.553	2.04102	0.758223	1.88585	1.02358	0.673644	9.21366	8.91633	7.03332	0	0.00351168	0.0302039	UP	2.71614
AT2G01913	0.777	2.66785	2.96933	2.42909	2.19285	2.51141	5.93267	5.57475	6.62751	0	0.00286932	0.0270844	UP	1.24292
AT2G01960	0.905	0.0121191	0.0105783	0.0143829	0.0105179	0.00819849	0.036028	0.0353383	0.0358145	0.0102926	1.00332e-05	0.00229358	UP	1.67876
AT2G02020	1.737	2.88561	4.43669	3.55951	3.01946	4.49791	7.40904	6.81469	7.94641	0	0.0003504	0.00957303	UP	1.00594
AT2G02380	0.815	1.41303	1.09242	1.03813	1.08618	1.26543	3.68319	3.81637	3.00543	0	0.00767065	0.0473919	UP	1.57043
AT2G02610	2.108	0.17386	0.304276	0.475463	0.196879	0.546555	1.08868	1.22204	1.32665	0.460396	0.000197305	0.00720677	UP	1.83684
AT2G02630	2.056	0.357415	0.321284	0.234247	0.560195	0.422226	0.898717	0.745578	0.859901	0	0.000777715	0.0136614	UP	1.13884
AT2G02710	1.724	143.568	123.859	139.641	164.893	145.996	42.1081	39.562	30.3211	0	1.12472e-05	0.0020653	DOWN	-1.94355
AT2G03470	1.711	32.0061	31.4504	33.77	33.1624	32.2587	16.0626	16.0484	14.7027	0	1.10666e-06	0.00119962	DOWN	-1.05978
AT2G03505	0.866	0.84855	0.541678	1.18742	0.736435	1.29372	2.01389	1.66728	1.89305	0	0.00165202	0.0201359	UP	1.01165
AT2G03530	1.514	23.9858	28.2205	24.3222	29.0653	15.9713	14.7867	9.52412	7.36737	0	0.00620223	0.0417675	DOWN	-1.2032
AT2G03710	1.417	6.85005	9.04636	6.0352	7.22131	9.49315	3.42699	3.03891	3.17136	0	0.00206577	0.0226192	DOWN	-1.26666
AT2G03720	0.846	1.07604	0.577116	1.24627	0.528816	0.306959	2.95047	3.21038	2.31776	0	0.00338796	0.0296791	UP	1.91961
AT2G04025	0.511	0.665367	0.468363	0.687763	0.279414	0.82763	1.48445	1.75508	1.87458	0	0.000968964	0.0152654	UP	1.54127
AT2G04040	1.542	1.55931	2.09018	1.57395	0.542264	0.73348	2.39903	2.71221	3.05842	0.0144299	0.00626792	0.0420666	UP	1.06698
AT2G04170	1.804	2.19478	3.19995	3.49096	3.59325	3.66458	8.19766	7.46421	6.25431	0.00170162	0.00790095	0.0483085	UP	1.17801
AT2G04430	1.019	3.23976	3.27879	3.10405	3.82055	3.10911	9.47375	8.10838	8.58663	0	0.00263765	0.0259471	UP	1.39778
AT2G04450	1.311	0.259346	0.401627	0.367363	0.34125	0.447102	0.994019	0.955791	1.0249	0	3.03821e-06	0.00162057	UP	1.4484
AT2G04680	2.07	0.111268	0.0601224	0.24524	0.0781728	0.161296	0.573168	0.599189	0.487605	0	0.000221278	0.00761086	UP	2.07613
AT2G05440	0.727	94.094	276.863	75.3958	213.195	304.123	423.007	433.721	383.622	0	0.00706595	0.0451501	UP	1.1011
AT2G05510	0.707	290.733	317.03	257.22	403.945	517.433	856.842	864.765	795.978	0	0.000155403	0.00647106	UP	1.23198
AT2G05540	0.756	287.731	308.081	248.916	480.48	424.892	76.1797	81.2493	78.0911	0	0.00344477	0.029958	DOWN	-2.15655
AT2G05910	0.81	1.12386	0.720954	1.1731	1.70396	1.03508	2.72942	2.48928	2.10329	0	0.00350765	0.0301924	UP	1.08389
AT2G06002	0.704	8.73999	7.08481	7.5252	7.17958	5.95468	2.69834	3.00864	2.01817	0	0.00011975	0.00586602	DOWN	-1.50267
AT2G07020	2.103	0.00521532	0.00455223	0.00618952	0.00452624	0.00352812	0.0154146	0.0151227	0.0152851	0	1.08737e-05	0.00232738	UP	1.6693
AT2G07042	0.945	7.11458	4.1839	7.23142	4.70395	3.77655	12.2738	11.0183	10.3475	0	0.000792379	0.0137608	UP	1.05361
AT2G12462	0.927	5.0284	4.40972	3.88952	3.09075	3.48171	9.32291	10.5187	8.06564	0	0.00688905	0.0443911	UP	1.22483
AT2G12646	1.071	0.604203	0.759788	1.4949	0.91543	1.68345	3.06916	2.63096	2.69523	0	0.000514522	0.0113825	UP	1.35824
AT2G14080	3.687	15.769	20.4267	17.5072	18.4255	14.9379	7.99915	7.55787	5.9686	0	0.000119505	0.00586255	DOWN	-1.2791
AT2G14095	0.867	0.341559	0.320215	0.04504	0.428176	0.504912	1.11421	1.51862	1.0752	0	0.00902937	0.0522243	UP	1.91401
AT2G14160	0.258	0.46762	0.705013	0.655873	0.922354	0.316341	0.0753881	0.0246536	0.124592	0	0.00518549	0.0376764	DOWN	-3.03431
AT2G15090	1.692	138.09	229.075	152.098	190.604	189.416	44.2149	62.2491	71.9911	0.000345841	0.000724961	0.0132113	DOWN	-1.59625
AT2G15370	1.602	0.143773	0.149397	0.0731267	0.219845	0.338098	0.594917	0.663061	0.69426	0	0.000130822	0.00605528	UP	1.81576
AT2G15890	1.486	786.557	630.273	754.204	768.595	612.203	221.675	268.641	192.573	0.00604727	3.43323e-05	0.00322263	DOWN	-1.64188
AT2G15960	0.38	823.943	951.11	915.167	1315.96	852.34	353.122	490.655	317.606	0	0.00142563	0.0187355	DOWN	-1.32771
AT2G16060	0.843	15.1572	5.62135	22.1266	5.11503	7.40203	58.3965	62.9045	62.0701	0	2.48098e-05	0.00273347	UP	2.4632
AT2G16230	1.512	0.108808	0.0823104	0.318527	0.0566589	0.230637	0.664632	0.677288	0.718578	0	0.000208546	0.00740018	UP	2.10741
AT2G16385	0.537	0.674	1.12313	1.96339	0.833107	0.87046	2.93382	2.19127	2.4303	0	0.00510833	0.0374314	UP	1.20449
AT2G16750	2.428	4.17843	5.05872	5.20555	5.45325	5.09412	12.9481	12.1842	10.9276	0	0.00309397	0.028245	UP	1.266
AT2G16760	1.134	0.880134	0.734462	0.539487	0.629543	1.22352	2.02963	2.14825	2.05794	0	0.000226746	0.00767329	UP	1.37497
AT2G16870	3.33	0.991386	0.951583	1.15312	0.888983	0.924669	6.14266	5.55647	5.63931	0	0.000807254	0.0139327	UP	2.55722
AT2G16970	1.341	0.122683	0.264141	0.320318	0.191651	0.603087	1.31021	1.10516	0.848561	0	0.00997726	0.0555001	UP	1.85681
AT2G16980	1.737	0.839793	0.865292	1.23646	1.25491	1.21738	3.65413	3.61424	3.06087	0	0.00158536	0.0197386	UP	1.66897
AT2G17050	4.068	0.0512263	0.110606	0.0415967	0.166133	0.206101	0.894094	0.764587	0.611602	0	0.00812644	0.0491506	UP	2.71654
AT2G17300	0.633	26.146	29.7484	23.0514	18.872	20.6414	13.9193	9.61629	9.92269	0	0.00191961	0.021756	DOWN	-1.08699
AT2G17590	2.051	0.00534755	0.0233382	0.0825038	0.023205	0.0325581	0.079027	0.0961381	0.115978	0	0.00958001	0.0540327	UP	1.53925
AT2G17850	0.506	4.877	0.624348	12.6307	0.206928	1.30503	18.9248	16.0524	15.3608	0	0.00326175	0.0291433	UP	2.09453
AT2G18000	0.824	1.15801	1.49874	0.963604	1.46708	1.6298	4.72877	3.52767	4.36137	0	0.00878068	0.0513337	UP	1.64649
AT2G18150	1.249	0.851785	0.55953	0.65656	0.480126	0.374249	3.05741	2.82638	2.68172	0	5.54262e-05	0.0040935	UP	2.28843
AT2G18193	1.697	2.19098	0.817992	1.83321	0.689923	1.51716	12.5274	13.0923	10.2855	0	0.00322284	0.0288955	UP	3.08562
AT2G18260	1.141	6.20004	6.68707	5.2591	8.76787	8.10893	2.98315	2.90437	3.65677	0	0.00246687	0.0250216	DOWN	-1.13863
AT2G18360	1.234	4.3818	1.77657	3.99779	2.90806	2.24273	9.07358	10.211	8.20548	0	0.000637119	0.0124043	UP	1.58169
AT2G18670	2.072	15.6101	13.8009	19.1416	16.6072	14.1195	8.32638	8.94232	6.46927	0.117531	0.000639267	0.0124245	DOWN	-1.00278
AT2G18700	2.8	102.42	82.3414	89.0147	121.992	149.21	23.5462	30.3424	22.6643	0.000171926	0.00190411	0.0216901	DOWN	-2.0947
AT2G19380	1.842	1.35163	1.25254	1.16598	1.32807	1.59913	3.23465	3.13887	3.37501	0	2.91951e-06	0.00158237	UP	1.27856
AT2G19440	1.437	0.0992218	0.113254	0.208337	0.112608	0.0671226	0.365451	0.438205	0.478703	0	0.00160334	0.0198741	UP	1.83142
AT2G19590	1.354	5.1923	2.55242	8.37328	2.63627	3.23856	24.339	21.9427	21.4472	0	1.58409e-05	0.00226518	UP	2.3597
AT2G19900	2.028	6.03014	5.29177	3.39535	4.49181	7.07938	1.59527	1.51488	1.55017	0	0.00418796	0.0333726	DOWN	-1.75896
AT2G20670	1.25	529.413	627.375	495.931	797.689	750.588	77.5256	191.943	203.849	0	0.00052551	0.0113784	DOWN	-2.02068
AT2G20800	1.811	0.00605623	0.0264311	0.0071875	0.00525604	0.0532608	0.50478	0.544393	0.55734	0	3.66711e-05	0.00340413	UP	4.76915
AT2G20960	2.533	43.7631	51.5327	51.6192	46.8795	34.046	20.8784	19.8101	17.3985	0	0.000735585	0.0133326	DOWN	-1.23477
AT2G21045	0.731	8.29714	8.21132	8.84984	8.34676	13.0224	20.2306	21.5008	22.0483	0	3.82324e-05	0.00346297	UP	1.18579
AT2G21550	1.479	1.57954	1.04213	1.71618	1.10054	1.30935	4.20748	4.08712	3.79297	0.00182208	1.0994e-05	0.00205246	UP	1.57801
AT2G21850	2.654	1.0211	0.999552	1.12471	1.1728	1.55203	2.7603	2.88	2.62913	0.00140743	1.3823e-05	0.00221195	UP	1.23135
AT2G22300	3.547	28.6924	39.1383	37.104	39.5395	34.729	14.8018	17.0439	14.3737	0.00276349	0.000174272	0.00681752	DOWN	-1.21806
AT2G22450	1.761	50.168	40.1254	49.2796	51.9177	40.9828	20.3926	23.3873	17.1548	0	0.000138656	0.00621252	DOWN	-1.19477
AT2G22470	0.683	17.3269	13.498	20.068	15.4836	17.088	31.2968	36.2918	32.8412	0	0.000667417	0.0126711	UP	1.00392
AT2G22600	1.899	0.236799	0.277269	0.18507	0.235586	0.238335	0.508701	0.633047	0.599221	0	0.00520571	0.0377417	UP	1.30658
AT2G22610	3.402	3.38836	3.24846	3.30962	2.88471	3.54843	8.28344	7.86473	7.50703	0.0011963	0.000354722	0.00962073	UP	1.26723
AT2G22830	2.025	6.62403	8.7791	6.92288	9.45288	9.80857	16.05	18.0893	17.1533	0	8.36573e-05	0.00496682	UP	1.03957
AT2G22890	0.955	11.0597	8.49069	10.4814	13.1667	13.0601	3.08894	5.04187	4.07278	0	0.000463336	0.0109416	DOWN	-1.4678
AT2G22920	1.555	1.96786	4.84515	3.47387	5.77243	4.93847	11.0697	10.7946	8.92608	0	0.00111089	0.0164162	UP	1.28921
AT2G22930	1.491	0.213325	0.314616	0.288093	0.427735	0.462794	0.926197	0.831871	0.978784	0	0.000154506	0.00646576	UP	1.41839
AT2G22980	1.73	177.355	228.559	171.57	233.362	212.618	103.948	103.266	95.2485	0	0.000954757	0.0151481	DOWN	-1.02167
AT2G23040	0.276	5.12627	6.90251	6.3668	5.06974	4.38189	16.091	13.2974	13.58	0	0.00271466	0.0263576	UP	1.36271
AT2G23050	1.766	0.540318	0.352359	0.995037	0.458148	1.24781	3.35183	3.12268	3.11981	0	2.84562e-05	0.00290651	UP	2.15369
AT2G23110	0.874	5.86038	3.12174	4.33389	3.67025	2.86089	0.511846	0.618596	0.713508	0	0.00314308	0.028492	DOWN	-2.6911
AT2G23320	1.237	79.878	100.044	98.8606	91.7626	74.5982	22.3747	24.2033	21.7503	0.00127741	0.000163368	0.00659833	DOWN	-1.96675
AT2G23540	1.359	4.31772	3.55742	4.91354	5.38622	8.28226	12.7616	14.7946	11.169	0	0.00357768	0.030506	UP	1.28658
AT2G23630	1.647	0.1798	0.191815	0.260805	0.29475	0.950542	3.42867	4.69226	3.86048	0	0.00466665	0.0355114	UP	3.41071
AT2G23760	2.541	15.8626	21.0794	14.0718	21.7832	21.0676	7.06512	9.4796	8.52384	0	0.00147928	0.0190898	DOWN	-1.16774
AT2G23810	1.285	219.228	239.587	260.037	164.44	112.103	30.8427	37.4757	36.1171	0	0.0035711	0.0304886	DOWN	-2.51569
AT2G24030	1.766	0.838424	0.645088	0.493833	0.522827	0.373923	4.06404	3.1587	3.78237	0	0.00438409	0.0342611	UP	2.67396
AT2G24300	2.214	4.52287	2.42576	5.13255	2.74726	2.55699	7.15397	6.92083	7.27392	0	0.00249795	0.0251848	UP	1.03324
AT2G24370	2.367	0.00463364	0.0040445	0.0274959	0.00402142	0.00313462	0.0465642	0.0349337	0.0353089	0	0.00260066	0.025772	UP	2.16765
AT2G24550	1.113	107.185	92.4562	114.74	82.8802	73.643	33.1276	37.8951	35.3793	0	0.00122032	0.0172955	DOWN	-1.40894
AT2G24610	2.398	0.681487	0.562902	0.99334	0.821672	0.788994	3.32821	3.27049	3.16085	0	1.25163e-07	0.000600855	UP	2.07952
AT2G25090	1.528	7.81673	3.76543	5.699	3.75639	4.88006	1.9221	1.45279	1.8134	0	0.00920132	0.0528368	DOWN	-1.58364
AT2G25200	1.172	29.6	53.9194	22.9789	52.9944	56.4639	7.42933	9.2967	10.0767	0	0.00776596	0.0477175	DOWN	-2.27332
AT2G25260	1.176	0.606215	0.854762	1.14006	0.963201	1.87384	4.95626	4.53789	3.72288	0	0.00255648	0.0254996	UP	2.0182
AT2G25735	0.7	11.9549	14.7293	17.6467	12.3607	7.17585	1.9728	3.77094	5.07885	0	0.00390698	0.0321396	DOWN	-1.82407
AT2G25810	1.166	2.19168	1.56819	3.31554	2.0164	2.9844	11.5933	11.112	10.6689	0	1.02509e-06	0.00127581	UP	2.20353
AT2G25980	1.627	2.95936	3.25387	6.21627	3.71504	6.84503	23.3872	21.4901	21.7683	0	2.15515e-06	0.00136645	UP	2.27249
AT2G26040	0.573	3.04343	3.95965	5.15665	3.57159	3.45732	8.02219	7.60388	7.41627	0	0.000120146	0.00587686	UP	1.001
AT2G26170	1.816	9.91449	7.29237	11.0902	6.44689	4.54436	18.2402	14.8541	14.3366	0.0493526	0.00493364	0.0367036	UP	1.00869
AT2G26190	2.022	34.1239	44.5572	39.2235	42.4763	39.2595	10.3599	12.1456	10.4637	0	2.76014e-05	0.00288946	DOWN	-1.86125
AT2G26360	1.304	0.700083	1.13913	1.09087	0.92923	1.45257	2.15728	1.9967	2.26866	0.00285844	0.000342755	0.00947977	UP	1.01091
AT2G26400	0.879	0.112299	0.0762381	0.162892	0.010829	0.0928509	0.228652	0.253267	0.197476	0	0.00381964	0.0317083	UP	1.315
AT2G26410	1.708	0.173379	0.0952849	0.114314	0.061303	0.0651607	0.785749	0.904936	0.681286	0	0.00493757	0.0367166	UP	2.95606
AT2G26530	1.455	34.6674	25.3907	40.5884	23.6364	16.4762	5.56546	6.84149	5.64244	0	0.0062678	0.0420741	DOWN	-2.22624
AT2G26570	2.583	25.702	26.259	23.9519	31.4968	31.5141	15.3086	13.3984	12.0539	0	0.000264459	0.00824385	DOWN	-1.03207
AT2G26980	2.445	98.3336	88.7833	68.5326	92.4656	101.086	32.8677	38.9936	46.354	0	0.000349	0.00958155	DOWN	-1.18898
AT2G27000	1.716	1.68353	1.48474	1.98814	2.24193	2.96108	4.8668	4.96616	4.11942	0.0118759	0.000809742	0.0139541	UP	1.16653
AT2G27010	1.565	1.12551	1.35716	1.86223	2.00611	1.57954	4.03449	3.57741	3.10746	0.0130068	0.00495771	0.0367525	UP	1.17169
AT2G27260	0.99	23.5199	32.6944	29.7803	24.8928	19.2985	11.0479	11.417	12.163	0	0.00326462	0.0291534	DOWN	-1.1736
AT2G27280	1.284	0.128129	0.0671028	0.0709625	0.0667198	0.086678	0.00504936	0.00495375	0.0350487	0	0.00455954	0.0350295	DOWN	-2.48236
AT2G27370	0.943	1.08166	0.802007	1.53217	1.5242	1.92769	3.2795	4.17521	3.811	0	0.00149007	0.0191116	UP	1.451
AT2G27500	1.846	43.901	42.7066	48.7592	30.3453	23.1632	11.6076	13.6412	15.6126	0	0.00588484	0.0405068	DOWN	-1.47166
AT2G27830	1.258	153.733	121.874	159.168	149.643	91.5776	37.5139	47.1181	36.5039	0	0.00116968	0.016884	DOWN	-1.74342
AT2G28120	2.052	16.3181	22.0625	16.664	15.8042	11.7839	1.87993	3.326	3.38678	0	0.000674845	0.0127473	DOWN	-2.52856
AT2G28240	2.252	3.77445	4.03423	4.3061	4.98336	5.07711	11.4323	11.6677	9.99453	0	0.00148074	0.0190647	UP	1.31461
AT2G28250	2.101	2.39611	3.69537	2.8313	3.81926	4.0506	7.70537	9.22456	8.51581	0	0.000635095	0.012408	UP	1.33656
AT2G28305	1.072	34.9395	50.1975	36.0991	32.756	33.9628	17.8353	10.7691	12.7919	0	0.000814732	0.0139899	DOWN	-1.44584
AT2G28400	0.749	29.0084	12.7943	22.9919	20.2701	19.2475	3.54032	8.73842	4.84959	0	0.00276932	0.0265962	DOWN	-1.86948
AT2G28500	0.765	6.86744	11.1251	6.58485	6.33335	12.948	1.68653	1.10583	0.663903	0	0.004262	0.0337386	DOWN	-2.92861
AT2G28690	1.097	0.849832	0.253078	0.676339	0.182217	0.629012	3.72927	3.25279	3.90893	0	0.000273393	0.00836712	UP	2.80881
AT2G28755	0.171	0.0641393	0.167953	0.685082	0.0556649	0.216948	2.00947	2.71535	2.51894	0	0.00205107	0.0225611	UP	3.343
AT2G28960	2.787	0.145608	0.223275	0.144784	0.385939	0.364725	3.60343	4.29747	3.73464	0	0.00217141	0.0232754	UP	3.93906
AT2G28970	2.361	0.0603904	0.133808	0.126803	0.181424	0.223123	0.848523	0.864785	0.618114	0	0.00911577	0.0525702	UP	2.42103
AT2G28990	2.655	0.673354	0.573318	0.436337	0.770817	0.846761	1.40412	1.52607	1.45044	0	0.000100595	0.0053657	UP	1.14538
AT2G29210	2.922	26.6163	23.3895	27.2047	27.3931	29.9705	57.7313	53.0813	55.394	0	3.87511e-05	0.00347251	UP	1.04154
AT2G29330	0.931	1.16629	1.26479	1.9434	1.66654	2.41477	7.58367	7.68603	7.09185	0	1.30497e-06	0.00128977	UP	2.13998
AT1G68050	2.113	34.7617	21.4165	34.3389	29.0246	25.349	7.53275	7.3841	5.72914	0.000232753	0.000733005	0.0133073	DOWN	-2.07407
AT2G29670	2.149	99.4249	180.094	80.2133	156.963	141.574	44.2794	29.9621	20.8544	0	0.00381903	0.031711	DOWN	-2.05426
AT2G29750	1.97	0.874086	0.889299	1.2488	1.35774	1.54042	3.47206	3.70982	3.03824	0	0.000903739	0.0146711	UP	1.52706
AT2G29940	4.449	5.21397	4.62851	5.3219	5.01288	3.48051	2.61871	2.09447	2.13431	0	0.000821824	0.0140471	DOWN	-1.0517
AT2G30040	1.46	11.8618	17.409	11.9735	12.7459	11.0024	5.43982	6.75707	6.32765	0	0.00259041	0.0257235	DOWN	-1.07387
AT2G30340	0.936	0.902268	0.603447	1.40456	0.640681	0.943308	2.86072	3.07838	2.4658	0	0.000709656	0.0130599	UP	1.64011
AT2G30420	0.696	5.9763	6.03835	5.55448	4.63626	4.7652	1.61153	2.56801	2.46627	0.000650577	0.000539095	0.0114802	DOWN	-1.2839
AT2G30550	1.995	12.837	12.011	17.2706	12.9731	11.7264	6.91235	6.27135	5.79087	0	0.00137157	0.0183773	DOWN	-1.07921
AT2G30840	1.256	3.39688	3.55951	3.51323	3.88781	4.59001	10.6697	9.45484	8.31768	0	0.00862658	0.0508129	UP	1.323
AT2G31035	0.252	0.130895	0.190288	0.051653	0.0377726	0.147384	0.284372	0.277996	0.281658	0.0052858	0.00420761	0.0334657	UP	1.33401
AT2G31085	0.529	0.767126	0.886755	1.20569	1.20558	2.25815	6.31179	6.52895	5.01918	0	0.00225121	0.0237593	UP	2.23494
AT2G31110	1.429	6.43947	5.51354	7.16867	4.01663	4.16933	12.9622	11.4527	12.2685	0	0.000108794	0.00554767	UP	1.16279
AT2G31180	0.836	0.879	0.286284	0.326971	0.307422	0.115377	1.54329	1.6358	1.22273	0	0.00134162	0.0182009	UP	1.93768
AT2G31310	0.654	0.0503111	0.0731906	0.019903	0.0727729	0.056725	0.188355	0.20424	0.147453	0	0.00534882	0.0383572	UP	1.72167
AT2G31390	1.283	19.0616	21.655	22.0397	19.4254	27.2913	61.7389	64.3323	65.0354	0.0282689	3.97137e-07	0.000667269	UP	1.54077
AT2G31650	3.365	3.27568	3.21766	2.88956	3.00129	4.13868	13.5351	12.9121	12.4586	0.00199203	1.47869e-05	0.00222825	UP	1.97249
AT2G31810	1.842	132.465	103.628	146.595	140.905	109.711	48.0481	56.0473	45.8157	0	0.000395274	0.0102491	DOWN	-1.34183
AT2G31880	2.084	54.6737	73.845	73.1807	49.0485	37.2262	13.0668	13.9222	12.9747	0.189575	0.00331136	0.0293524	DOWN	-2.11221
AT2G32150	1.114	252.152	227.912	206.758	261.781	222.929	70.6246	69.8811	49.8329	0	7.97376e-06	0.00209336	DOWN	-1.88479
AT2G32800	2.728	9.80699	19.0191	9.83049	19.288	16.197	4.19266	6.16593	5.34355	0.00971966	0.00886798	0.0516374	DOWN	-1.50236
AT2G32885	1.793	2.50186	2.22648	2.76593	2.25624	1.81663	0.574934	0.783991	1.05057	0.375	0.000436366	0.0107034	DOWN	-1.52626
AT2G32960	1.239	1.69076	2.4339	3.30929	1.89759	1.94623	5.27984	5.0464	4.16661	0	0.00262327	0.0258891	UP	1.09882
AT2G33205	1.269	1.1495	1.13914	1.17959	1.47768	1.0232	2.87639	2.67156	2.69012	0	6.33659e-06	0.00204745	UP	1.20175
AT2G33580	2.239	5.51085	7.0079	6.09842	4.33209	3.10505	1.47389	1.19599	1.10547	0	0.00396459	0.0323521	DOWN	-2.04988
AT2G33640	2.11	1.13837	0.948259	0.857489	0.663151	0.840423	4.74116	4.2173	3.82994	0	0.00349134	0.0301292	UP	2.26067
AT2G33830	0.676	2123.98	1872.53	2542.95	3332.03	2282.6	846.09	1108.81	731.709	0	0.00203906	0.0225027	DOWN	-1.44062
AT2G34010	1.221	0.422185	1.38778	0.18123	0.569095	0.394985	4.43376	4.24562	3.94371	0	7.3447e-06	0.00205676	UP	2.83167
AT2G34020	2.092	0.382721	0.29745	0.503987	0.332153	0.585201	2.1477	1.78474	1.5765	0	0.00824226	0.0495214	UP	2.12731
AT2G34220	2.973	0.180768	0.170665	0.0488443	0.118463	0.212132	0.365861	0.369378	0.411925	0.0212652	0.000443254	0.0107624	UP	1.38735
AT2G34230	2.489	0.0572847	0.142311	0.0889038	0.156796	0.0745242	0.283925	0.201884	0.229881	0	0.00935697	0.0533206	UP	1.19829
AT2G34390	1.119	1.39784	1.33716	1.04834	1.02146	0.955908	3.02198	2.63315	2.73578	0.0255323	0.000235642	0.00778616	UP	1.27954
AT2G34670	2.908	0.818438	1.28061	0.900842	1.20129	1.20174	2.24125	2.17698	2.14666	0.00127374	0.000130694	0.00605771	UP	1.018
AT2G34840	1.277	5.86611	5.64504	5.94256	5.59791	5.13041	16.1602	14.3002	14.7357	0	0.0021745	0.023301	UP	1.41839
AT2G34880	2.421	0.0226514	0.00395429	0.00537652	0.00393172	0.0030647	0.0348137	0.0236454	0.0345213	0	0.00572969	0.0398882	UP	1.99121
AT2G35120	0.84	16.3748	17.9634	18.8963	20.6064	21.7872	44.7758	42.7278	42.2778	0.00632414	1.30686e-06	0.00125473	UP	1.17754
AT2G35270	0.858	0.472972	1.05998	1.10747	1.27582	2.20514	3.42304	2.4538	2.80985	0	0.00751228	0.046792	UP	1.24192
AT2G35380	1.29	1.52189	1.25418	2.14925	2.66376	4.06642	5.634	6.89806	5.2179	0	0.00335651	0.0295654	UP	1.34377
AT2G35550	1.335	1.10911	1.39835	1.12128	1.90374	1.49504	0.577919	0.671796	0.679011	0	0.00540987	0.0386383	DOWN	-1.1284
AT2G35660	1.563	11.9351	13.313	9.40089	12.2937	11.2226	33.4259	26.117	28.2415	0.0366432	0.00974542	0.0546081	UP	1.33077
AT2G35770	1.552	0.519888	0.277577	0.456068	0.42084	0.501973	5.50847	5.37911	4.29525	0.0909091	0.00631952	0.0422862	UP	3.53943
AT2G35830	0.788	127.74	122.885	99.9143	113.361	81.2389	59.4715	46.4534	43.9357	0.023609	0.00100621	0.0156034	DOWN	-1.12604
AT2G36100	0.855	4.83611	3.70489	6.10898	4.86359	6.64833	13.6868	16.0655	12.2449	0.00571695	0.00636679	0.0423831	UP	1.41979
AT2G36120	1.029	66.585	162.802	60.1494	123.336	116.818	238.889	254.159	191.887	0	0.00494543	0.0367344	UP	1.10778
AT2G36220	1.219	60.4122	48.4164	69.8383	66.9721	43.4526	24.2437	25.2939	19.3136	0.00169953	0.00147721	0.0190704	DOWN	-1.33301
AT2G36295	0.552	0.496731	0.225459	1.01397	0.25866	0.604861	1.32721	1.48645	1.36265	0	0.00240183	0.024622	UP	1.42086
AT2G36770	1.628	8.09923	9.38801	8.88828	7.5172	8.44938	1.20449	1.16563	1.04542	0.029316	1.59829e-05	0.00225667	DOWN	-2.89494
AT2G36880	1.754	45.6284	54.509	43.8511	39.8059	51.3664	96.6851	94.1654	95.404	0	2.16177e-05	0.00256693	UP	1.02062
AT2G37440	2.191	0.635743	0.318965	0.588151	0.656012	0.843217	1.51802	1.58798	1.1825	0	0.00625127	0.0419967	UP	1.23237
AT2G37560	1.507	0.546216	0.438768	0.233428	0.588085	0.783513	1.06314	1.15283	0.985456	0.00114744	0.00205425	0.0225666	UP	1.04272
AT2G37700	1.956	0.117753	0.0636264	0.0865109	0.180378	0.238976	0.314888	0.400336	0.351685	0.00182672	0.00172555	0.020533	UP	1.37151
AT2G37980	2.18	0.870383	0.689455	0.973256	0.877641	1.0721	2.46547	2.3721	2.04959	0	0.00204164	0.0225164	UP	1.35646
AT2G38320	1.538	1.9183	1.89848	1.76883	1.50393	1.52927	7.27167	7.14225	6.97652	0	3.61513e-08	0.000404943	UP	2.04837
AT2G38390	1.223	1.51559	2.10566	3.09715	1.06628	2.42063	7.17253	8.18091	7.18589	0	5.12793e-05	0.00398887	UP	1.88009
AT2G38400	1.899	42.2599	26.9858	36.1023	47.3027	33.6208	18.1801	20.1068	15.231	0	0.00338936	0.0296759	DOWN	-1.06235
AT2G38470	1.902	199.7	137.918	280.049	149.742	84.4305	11.9567	12.046	10.9968	0.00284076	0.00856994	0.050648	DOWN	-3.86821
AT2G38720	1.928	0.563182	1.0775	0.573863	0.745499	1.0583	1.83942	1.84418	1.85065	0	0.000757532	0.0134831	UP	1.19876
AT2G38790	1.076	34.0723	39.2454	35.4635	39.9724	26.7923	5.19588	6.5841	3.56747	0.0111073	7.4484e-05	0.0046697	DOWN	-2.77881
AT2G38820	1.637	31.2419	16.1466	28.7446	33.2427	32.2122	12.7885	14.3415	10.4426	0	0.00529359	0.0381075	DOWN	-1.17698
AT2G38830	1.096	10.0972	7.85258	9.60803	10.0658	8.40125	4.44253	5.72804	3.63094	0	0.00321756	0.0288559	DOWN	-1.00062
AT2G38860	1.539	8.55904	9.85947	9.71802	10.0135	9.45413	25.1963	23.7686	21.1749	0	0.00530429	0.03816	UP	1.29611
AT2G39110	1.531	2.72942	0.756612	3.18825	1.38646	1.25518	4.925	4.92314	3.66588	0	0.00634331	0.0423358	UP	1.27365
AT2G39130	2.067	21.0134	18.4187	20.0791	18.1282	17.5176	54.8496	49.1214	52.8516	0.00232315	0.000757861	0.0134818	UP	1.45772
AT2G39250	1.244	10.0068	17.3074	8.71607	14.2398	14.4754	5.20651	2.42869	2.05168	0	0.00203992	0.0225048	DOWN	-2.00371
AT2G39370	1.137	0.723471	1.30507	1.06468	1.18042	1.2725	2.97084	2.73557	2.31261	0	0.00445145	0.0345945	UP	1.26891
AT2G39430	1.185	2.86608	1.572	2.27297	1.99725	2.94776	5.77126	6.65951	6.28655	0.0280578	8.078e-05	0.00489104	UP	1.42026
AT2G40000	1.519	707.335	441.148	781.293	533.843	399.278	52.8274	98.5247	77.4053	0	0.00223874	0.0236872	DOWN	-2.90862
AT2G40113	0.907	2.45476	1.34048	3.08551	1.52173	2.28234	4.19597	5.14039	4.34502	0	0.00173667	0.0205562	UP	1.09362
AT2G40170	0.61	5.73563	5.69692	2.24056	5.88286	7.82102	1.09473	1.55366	1.29633	0	0.00931902	0.0532036	DOWN	-2.058
AT2G40205	0.116	19.1937	83.7666	7.96703	60.8047	56.9905	109.379	138.453	135.506	0	0.00278224	0.0266746	UP	1.48199
AT2G40330	1.071	1.83309	0.867052	2.02966	0.471046	0.0900609	4.90945	4.72147	6.68105	0	0.00587597	0.0404872	UP	2.36131
AT2G40370	1.782	0.72011	0.413662	0.577053	0.817261	0.961804	1.42984	1.76684	1.41783	0	0.00312282	0.0283619	UP	1.13996
AT2G40420	1.632	20.8228	20.0763	21.3513	26.6722	21.3483	10.7619	11.2285	9.51499	0.000453613	0.000213707	0.00750409	DOWN	-1.07041
AT2G40470	0.907	0.592529	0.390533	0.416185	0.346325	0.564448	1.02219	1.11504	1.02778	0	5.401e-05	0.0040603	UP	1.19127
AT2G40550	2.031	4.61718	4.89743	4.83875	4.26021	6.42597	10.8567	11.2524	11.7215	0	8.4449e-06	0.00216628	UP	1.17109
AT2G40670	0.64	9.20269	2.79721	7.30148	2.81099	1.75057	12.8756	11.9361	12.4058	0	0.0057515	0.0399821	UP	1.37818
AT2G40820	1.908	13.5718	9.40775	15.4793	9.41393	8.37237	32.4271	32.6865	26.0089	0	0.00256755	0.025572	UP	1.43304
AT2G40900	1.629	7.07623	4.60155	5.37762	3.92084	3.92161	15.9318	12.3347	12.0567	0	0.00945208	0.0536443	UP	1.43256
AT2G41010	0.939	16.6678	18.5451	21.223	12.4584	9.6637	4.38439	4.09816	4.11479	0	0.00516083	0.03766	DOWN	-1.90367
AT2G41100	1.4	510.921	418.881	717.798	426.417	254.297	26.392	38.0774	45.4479	0.000202102	0.0046304	0.0353074	DOWN	-3.66783
AT2G41430	1.311	859.247	1099.74	985.158	1311.1	1154.41	419.006	562.602	498.892	0	0.000627695	0.0123424	DOWN	-1.13249
AT2G41800	1.29	0.807708	0.615958	0.55497	0.435351	1.66223	4.82986	5.12301	5.04845	0	8.78407e-06	0.00218652	UP	2.61675
AT2G41870	1.495	33.9452	29.7702	26.4423	53.7695	56.7118	11.0109	8.70064	4.05517	0	0.00520963	0.037762	DOWN	-2.34062
AT2G42060	0.975	0.146238	0.284745	0.173554	0.146553	0.433763	0.512021	0.58061	0.507721	0.000814925	0.0038684	0.0319395	UP	1.17065
AT2G42530	0.653	79.7309	142.574	137.202	102.811	73.026	31.9602	32.0953	21.5118	0	0.00435115	0.0341466	DOWN	-1.90837
AT2G42570	1.394	6.7113	6.66837	8.24507	6.8215	8.38302	15.3155	13.5197	15.4359	0	0.000900912	0.0146678	UP	1.00248
AT2G42720	1.786	0.055269	0.112564	0.065593	0.154559	0.178636	0.417463	0.373944	0.435555	0	6.78395e-05	0.00455025	UP	1.8516
AT2G42850	1.588	4.77252	1.73019	3.8771	2.49956	1.89229	5.69541	7.14969	6.48156	0	0.0029752	0.0276796	UP	1.12473
AT2G42880	2.438	38.4594	36.381	36.6952	36.5482	32.4997	70.9635	75.4169	74.0013	0	1.4869e-05	0.00222071	UP	1.0243
AT2G43010	1.753	149.376	203.967	141.92	241.073	206.704	80.9109	87.7823	67.953	0	0.00303979	0.027986	DOWN	-1.25762
AT2G43150	1.047	73.2131	47.9581	113.37	59.4486	59.5059	180.909	172.223	181.65	7.05517e-05	0.000434375	0.0106779	UP	1.33422
AT2G43290	0.996	68.3507	84.2472	85.3748	44.0428	43.8361	14.4342	17.7599	20.4507	0.0020005	0.00581178	0.0402181	DOWN	-1.89288
AT2G43480	1.052	0.198088	0.227503	0.284583	0.0814337	0.390873	1.34855	1.49484	1.5194	0.00907709	1.14926e-05	0.00207632	UP	2.6204
AT2G43490	3.038	4.51638	4.31399	4.70876	3.94471	5.07158	10.4212	10.4407	9.60186	0.00316198	8.9784e-05	0.00512241	UP	1.17059
AT2G43600	0.822	0.173457	0.0116464	0.142517	0.0578996	0.333974	0.670422	0.812488	0.664792	0	0.000293585	0.00869986	UP	2.3147
AT2G43610	1.104	7.89803	5.66249	11.755	5.49222	14.1202	31.8003	31.5438	30.6015	0	0.000129093	0.00604185	UP	1.80118
AT2G43840	1.462	1.01914	0.805417	1.29411	1.18526	0.796773	2.22063	2.51612	2.28394	0.00630983	9.00134e-05	0.0051268	UP	1.19788
AT2G43880	1.185	0.601611	0.266599	0.845802	0.249012	0.5823	2.4894	2.95755	2.63125	0	0.000122343	0.00594104	UP	2.40315
AT2G44290	0.884	44.7026	40.2318	51.168	33.0678	19.3632	10.9645	7.23124	6.63983	0	0.00463329	0.0353215	DOWN	-2.18737
AT2G44300	0.837	4.46837	4.95251	4.05893	3.49132	3.48377	7.7847	9.06597	8.6564	0	0.000563164	0.0117107	UP	1.05542
AT2G44490	2.009	77.6592	138.787	91.3232	125.126	112.831	45.1448	58.0434	58.0076	0	0.00534969	0.0383552	DOWN	-1.0224
AT2G44520	1.603	17.5225	14.9602	16.2646	14.8154	13.7886	30.4755	33.0728	32.9227	0	5.74912e-05	0.00418167	UP	1.05564
AT2G44790	0.962	10.3408	6.67745	8.75438	7.80691	13.4895	19.9017	21.9977	20.7771	0	0.000190915	0.00712836	UP	1.15011
AT2G45290	2.598	3.70238	6.23114	4.69458	5.01582	6.5086	11.9261	12.6551	12.0536	0	4.10662e-05	0.0036031	UP	1.22323
AT2G45600	1.365	10.0358	8.5634	10.5563	13.9956	14.8664	5.74242	5.82008	3.75374	0	0.00370779	0.031235	DOWN	-1.18446
AT2G46070	1.348	18.0058	18.543	20.1718	19.1574	17.0244	10.2589	8.46981	8.22693	0	0.000143914	0.00626434	DOWN	-1.04816
AT2G46130	0.6	0.164517	0.0797777	0.0216943	0.364883	0.358616	0.745588	1.0707	0.782186	0	0.00629318	0.0421771	UP	2.12988
AT2G46192	0.827	2.02911	2.37307	1.24342	1.1625	2.26985	3.95902	3.79176	4.56322	0	0.00076172	0.0135004	UP	1.17682
AT2G46220	1.123	420.205	354.793	397.046	420.73	357.404	186.609	198.572	154.254	0	5.93141e-05	0.00424083	DOWN	-1.11712
AT2G46440	2.34	0.18541	0.370599	0.550865	0.109941	0.0633783	1.09597	0.982628	1.06999	0.157372	0.000427096	0.0105998	UP	2.03531
AT2G46495	1.119	0.0882131	0.0941078	0.104691	0.0765578	0.165765	0.376604	0.278526	0.35046	0	0.00519553	0.0377086	UP	1.66276
AT2G46510	2.363	34.9457	29.5384	35.8217	22.2479	18.7736	7.44916	7.07124	5.81406	0	0.0028654	0.0270855	DOWN	-2.06008
AT2G46600	0.582	256.471	188.472	277.447	251.987	166.148	60.0698	68.9291	51.6043	0.00734383	0.00105766	0.0159953	DOWN	-1.92184
AT2G46640	1.321	12.1136	14.1535	11.6174	11.2336	6.35247	26.3114	24.2628	21.5936	0	0.000890132	0.0146055	UP	1.1166
AT2G46670	0.727	0.979991	1.27575	1.21008	1.38776	1.93227	0.28977	0.624747	0.707354	0.371378	0.0072561	0.0458679	DOWN	-1.32791
AT2G46810	1.415	15.2929	14.3904	11.1216	9.69359	9.69534	29.8144	23.8377	26.5472	0	0.0024177	0.0247244	UP	1.15094
AT2G46850	1.974	0.205577	0.101844	0.112098	0.0819745	0.146589	0.804674	0.628328	0.706726	0	0.0026841	0.0262123	UP	2.46014
AT2G47060	1.719	31.3722	50.8851	38.3833	36.1644	37.5212	17.2626	18.7192	17.6038	0	0.00266802	0.0261465	DOWN	-1.1216
AT2G47130	0.923	4.17086	6.50323	6.78328	7.04363	7.83764	18.1015	16.5872	16.5703	0	1.32723e-05	0.00217562	UP	1.40151
AT2G47140	1.033	0.244201	0.657993	1.44908	0.58052	1.22823	3.70927	4.18089	3.81504	0	2.50756e-05	0.00275373	UP	2.22945
AT2G47200	0.603	1.2914	0.714428	2.82781	1.0892	1.58728	3.98894	5.09482	3.9128	0	0.00276309	0.0265896	UP	1.52819
AT2G47360	1.072	1.58583	0.866243	1.44494	1.39406	1.86183	3.24774	3.18624	2.64474	0	0.00178943	0.0209082	UP	1.08092
AT2G47520	0.684	0.657428	0.32191	1.12277	0.0695811	0.661693	4.61609	3.09662	3.63742	0	0.00975911	0.0546758	UP	2.73908
AT2G47750	2.155	1.48104	3.62054	1.09327	2.04508	2.63388	5.00318	4.27091	4.02442	0	0.00554378	0.0392361	UP	1.02737
AT2G47870	0.312	0.597606	0.767094	0.542357	0.518647	0.689645	1.47538	1.40668	1.62784	0	0.000380236	0.00995905	UP	1.27067
AT2G47895	0.417	0.62014	1.43964	0.931956	1.21253	0.748027	2.56131	2.60915	2.07551	0.0406635	0.00169159	0.0203815	UP	1.28605
AT2G48080	1.519	0.33936	0.497889	0.265644	0.670507	1.05995	1.83959	1.64564	1.78182	0	0.000492011	0.0111187	UP	1.63145
AT2G48130	0.765	4.43014	1.83958	4.1687	4.04389	4.43238	12.4667	14.4257	11.0006	0	0.00403135	0.0326118	UP	1.73939
AT2G48150	0.734	0.254023	0.247811	0.230539	0.116714	0.0707595	0.485812	0.407287	0.464214	0	0.00097629	0.0153448	UP	1.29825
AT3G01190	1.203	6.60987	4.00281	7.758	5.45169	10.8488	19.4501	20.2979	21.3175	0	8.42706e-05	0.00497685	UP	1.55359
AT3G01220	1.222	2.91697	2.32674	2.78013	3.07683	3.90411	6.53113	6.16803	6.37106	0	5.71243e-05	0.00417306	UP	1.08286
AT3G01311	0.879	0.0124776	0.119803	0.192509	0.010829	0.075969	0.30241	0.383518	0.255987	0	0.00591741	0.0405814	UP	1.93137
AT3G01720	2.867	5.54321	7.00887	7.04175	6.13884	7.54903	13.6746	14.7335	13.5328	0	2.72252e-05	0.00288604	UP	1.07059
AT3G01730	0.43	0.229559	0.0222636	0.151355	0.199228	0.017255	0.678493	0.724815	0.612991	0	5.89809e-05	0.0042441	UP	2.43912
AT3G01860	1.164	12.7298	9.56511	14.2355	9.88668	8.67536	28.6015	29.6446	28.2508	0	1.59532e-05	0.00226198	UP	1.38776
AT3G01900	1.491	0.228037	0.109153	0.183332	0.0829933	0.144312	0.508756	0.430867	0.547602	0	0.00101015	0.0156356	UP	1.72881
AT3G01950	0.389	5.38523	6.71856	4.58424	7.12067	5.93189	12.1834	11.7892	11.8167	0	9.59727e-05	0.005287	UP	1.00406
AT3G02130	3.68	15.2626	20.2315	16.3591	18.8951	15.8373	6.80931	7.51002	7.33911	0	0.000311264	0.009017	DOWN	-1.26223
AT3G02140	1.222	6.38144	5.30372	5.74135	5.11766	5.89563	2.11691	2.12888	2.80411	0	9.92143e-05	0.00534294	DOWN	-1.27527
AT3G02170	3.3	36.483	45.659	34.6511	37.3738	32.0371	15.958	18.7865	14.9161	0.000459341	0.000284093	0.00855436	DOWN	-1.16974
AT3G02340	1.44	18.333	15.3772	19.4616	19.824	18.2348	7.89261	9.82804	8.29957	0	6.71619e-05	0.00452287	DOWN	-1.07292
AT3G02410	1.34	0.237363	0.535821	0.398268	0.518556	0.813945	1.2241	1.45725	1.36735	0	0.000341693	0.00946601	UP	1.43021
AT3G02550	1.382	10.1504	5.42396	14.0244	8.76794	7.425	26.0789	22.0136	21.7011	0	0.000662704	0.0126101	UP	1.34498
AT3G02885	0.64	0.80545	1.51079	0.99658	0.550299	1.07817	7.48627	6.86748	6.15771	0	0.00130854	0.0180066	UP	2.79044
AT3G03130	1.793	3.61516	3.12348	3.07083	2.63848	3.38084	6.50507	6.21162	6.8592	0	5.13213e-05	0.00398291	UP	1.04349
AT3G03270	1.02	30.3121	16.0212	41.3595	15.4445	18.1927	67.2555	55.1441	62.1148	0	0.00092456	0.0148869	UP	1.34176
AT3G03341	0.519	6.65677	16.0662	7.5491	13.8837	11.6798	1.8863	2.95358	3.30737	0	0.00811132	0.0490945	DOWN	-2.03984
AT3G03370	1.171	2.31866	2.43138	2.73021	3.35658	3.23955	5.77984	6.34423	6.65198	0.108808	0.000237051	0.00780968	UP	1.15258
AT3G03650	1.909	0.273508	0.268276	0.229068	0.659231	0.566914	1.72291	2.09956	1.49271	0.0182534	0.00590194	0.0405664	UP	2.14925
AT3G03660	0.9	1.23083	0.457392	2.18389	0.750919	0.634791	3.69552	3.24391	2.43585	0	0.00895729	0.0519684	UP	1.57136
AT3G03870	1.436	50.7529	45.62	71.6183	57.0127	33.3005	25.4865	28.4943	16.4708	0	0.00886776	0.0516451	DOWN	-1.1374
AT3G04320	0.871	0.11333	0.362709	0.911607	0.622922	1.37148	2.64248	3.54179	3.65364	0	0.00285125	0.0269973	UP	2.27742
AT3G04590	1.665	18.7803	19.2674	18.7079	20.1865	19.8258	97.3052	78.9672	79.7998	0	0.00799164	0.0486153	UP	2.14092
AT3G04640	0.778	25.5217	50.8884	27.3955	26.6458	17.8444	3.50979	4.19763	4.00775	0.0027085	0.00984353	0.0549654	DOWN	-2.92506
AT3G04930	1.895	34.8019	35.1157	35.3267	40.1895	38.0848	16.1383	20.9078	16.6881	0	0.000546928	0.0115591	DOWN	-1.03505
AT3G05200	1.749	34.7973	30.3073	33.4531	33.0079	26.9762	8.16631	10.0773	11.6853	0	1.52938e-05	0.00226402	DOWN	-1.66829
AT3G05360	2.554	1.66192	1.51809	2.43105	1.3678	1.25791	4.1454	4.03702	3.43094	0	0.000702107	0.0129849	UP	1.2326
AT3G05390	1.684	0.39774	0.312994	0.811603	0.412627	0.585992	1.7611	1.5826	1.35807	0.0020711	0.001483	0.0190718	UP	1.6362
AT3G05660	3.043	0.212653	0.814818	0.337926	0.59746	0.353548	1.26344	1.87495	1.67114	0	0.00826718	0.0495736	UP	1.79097
AT3G05685	0.543	2.60562	2.13328	2.2773	1.49003	1.89932	5.81474	6.36062	6.0027	0	4.88197e-06	0.00193004	UP	1.54181
AT3G05730	0.573	111.803	100.395	91.7065	41.7792	46.6543	249.684	294.908	297.515	0	0.000202619	0.00733707	UP	1.83887
AT3G05740	2.06	1.08081	1.15716	1.10578	0.854834	1.86211	3.34549	3.22659	3.36114	0.00557621	0.000145176	0.00628673	UP	1.44974
AT3G05790	2.829	0.1512	0.057528	0.0966234	0.0975758	0.102286	0.524812	0.532862	0.674935	0	0.00625026	0.0419983	UP	2.51495
AT3G05820	2.108	0.213321	0.549513	0.57426	0.302539	0.327337	1.33174	1.30652	1.11317	0	0.000222389	0.00762567	UP	1.66843
AT3G05920	0.646	2.15621	1.64495	3.64705	1.37034	1.98699	8.03899	8.26093	6.41898	0	0.00174316	0.0205678	UP	1.80909
AT3G05936	0.758	16.1334	13.9306	13.3772	13.8511	19.1951	7.58675	4.47257	2.79039	0	0.00336967	0.029627	DOWN	-1.62782
AT3G05950	0.796	0.0137787	0.060134	0.0817623	0.0119582	0.15846	1.26247	0.886971	1.04187	0	0.00852206	0.0504359	UP	4.02776
AT3G06035	0.782	4.47409	6.96576	6.60815	4.36983	4.58272	14.3016	14.226	13.4087	0	1.87216e-05	0.00241042	UP	1.37217
AT3G06260	1.387	0.19769	0.296794	0.15954	0.253923	0.133735	0.434718	0.44483	0.449608	0	0.00125889	0.0176119	UP	1.08856
AT3G06435	1.664	1.74668	1.05284	2.77697	1.17268	1.25296	6.00414	8.34449	7.53777	0.0833333	0.0055877	0.0393893	UP	2.18855
AT3G06650	2.203	42.2632	47.4669	42.5121	49.0712	51.9506	104.89	97.9207	102.632	0.000172583	5.96577e-06	0.00208827	UP	1.12591
AT3G06700	0.565	145.183	190.806	154.978	172.903	187.093	319.292	360.889	373.162	0	0.00169625	0.0203938	UP	1.04477
AT3G06780	1.034	37.1836	28.5377	42.6278	35.7542	30.6319	14.4832	15.5097	13.6279	0.0352229	0.000907812	0.014723	DOWN	-1.26512
AT3G07000	1.896	0.121479	0.106034	0.11671	0.12551	0.160446	0.509506	0.506568	0.627295	0	0.00643921	0.0427297	UP	2.11979
AT3G07040	3.073	5.08596	7.47361	5.66324	4.69894	4.65266	2.68154	2.36583	2.32429	0	0.00352372	0.030261	DOWN	-1.1663
AT3G07130	1.676	1.82278	1.50992	2.08693	2.09378	2.4793	8.30964	7.45375	7.98282	0.041579	6.79352e-05	0.0045476	UP	1.98572
AT3G07260	0.914	0.0851396	0.0316491	0.129544	0.137439	0.0739906	0.166258	0.205629	0.222352	0.0199819	0.00633371	0.0423137	UP	1.11341
AT3G07350	1.324	75.8718	72.7327	70.1852	115.885	139.746	15.7432	27.6475	17.9321	0	0.00481611	0.036206	DOWN	-2.2147
AT3G07360	1.789	47.6417	74.7512	46.8785	71.462	75.8097	31.5181	28.8308	30.6282	0	0.00712107	0.0453901	DOWN	-1.06186
AT3G07500	0.823	13.1712	9.68991	12.3439	12.0264	9.24564	5.37749	5.68073	4.5734	0.0429373	0.000637508	0.0123975	DOWN	-1.11623
AT3G07870	1.612	22.3235	15.9338	23.5057	19.1378	13.2329	9.98649	9.16608	7.02317	0	0.00410115	0.0329465	DOWN	-1.10951
AT3G08040	2.091	0.844486	0.737114	1.71189	0.660072	1.08935	3.92847	2.92327	3.13914	0	0.00431168	0.0339957	UP	1.72332
AT3G08760	2.147	30.2982	35.6759	34.9028	33.894	29.6543	9.38233	10.1112	8.2555	0	6.45995e-06	0.00202879	DOWN	-1.82996
AT3G08800	3.097	2.34797	2.26582	2.29902	2.63401	2.23044	6.3159	5.35426	5.20833	0	0.0088068	0.0514327	UP	1.25615
AT3G09220	1.964	2.89832	7.69668	3.26739	8.53483	13.0524	22.4839	23.0362	20.1411	0	0.000582014	0.0118533	UP	1.62624
AT3G09270	0.856	9.51997	17.9947	10.5379	16.3575	23.0823	36.9234	43.1051	40.7141	0	0.000198506	0.00723492	UP	1.37677
AT3G09710	1.939	1.94016	1.95021	1.61784	2.2729	2.63648	3.91544	4.30711	4.63188	0	0.000642168	0.0124234	UP	1.04021
AT3G09790	2.331	0.324659	0.538012	0.340631	0.477772	0.296021	0.848318	0.679448	0.857742	0	0.00407239	0.0328332	UP	1.00788
AT3G09830	1.911	11.6565	16.1559	16.1089	11.5808	10.5956	5.68949	6.23414	5.04289	0	0.00235151	0.0243889	DOWN	-1.22495
AT3G09925	0.516	3.84724	2.54176	8.85429	4.88848	1.91243	14.8138	16.8261	11.6992	0	0.0044904	0.0347846	UP	1.71223
AT3G09940	1.497	0.300388	0.569156	1.69554	0.451454	1.27378	6.36211	5.6553	5.46695	0	3.30935e-05	0.00315931	UP	2.76387
AT3G09960	1.113	0.384317	0.576292	0.268985	0.778258	0.739964	1.2291	1.1944	1.05705	0	0.00188905	0.0216285	UP	1.078
AT3G10020	0.724	871.018	605.196	718.266	808.366	680.833	278.848	323.399	198.755	0	0.000226051	0.0076807	DOWN	-1.4643
AT3G10040	1.657	4.98417	2.80209	4.72115	2.34951	3.1389	10.7717	10.4449	10.3709	0	0.000117494	0.00577231	UP	1.54866
AT3G10300	1.775	21.2621	38.7949	29.8831	32.4172	31.8062	13.2407	16.8529	14.303	0	0.00311331	0.0283445	DOWN	-1.05897
AT3G10660	2.142	1.49003	1.20225	1.5982	1.09763	1.67998	4.56137	4.7185	4.37299	0	1.31917e-06	0.00123137	UP	1.68678
AT3G10915	1.579	22.1093	17.0792	24.9202	16.7647	16.31	48.4714	47.4247	48.0154	0	5.5344e-05	0.00409643	UP	1.30336
AT3G11010	2.952	1.44921	1.60851	1.59569	1.33126	1.36926	4.23748	3.86152	3.5629	0.0386994	0.00377809	0.0315348	UP	1.40218
AT3G11020	1.434	6.95473	4.75454	4.78952	5.58128	5.26654	2.26875	2.31375	1.76219	0.00959314	0.000470543	0.0109351	DOWN	-1.37078
AT3G11260	0.75	1.477	0.625458	1.09339	0.723421	0.702392	2.46368	2.21349	2.08297	0	0.000493105	0.011121	UP	1.28561
AT3G11385	2.301	0.00476655	0.0208025	0.0509122	0.00413676	0.0225717	0.0929819	0.102279	0.0866131	0	0.000346752	0.00955887	UP	2.18671
AT3G11410	1.639	90.5331	93.5546	77.869	129.109	153.169	24.189	22.0235	19.6555	0	0.00326467	0.0291461	DOWN	-2.30961
AT3G11550	0.827	3.38186	2.55829	4.51723	2.58973	4.44101	8.22378	8.19112	6.84872	0	0.000932185	0.014931	UP	1.14867
AT3G11820	1.557	40.9198	41.054	51.991	37.873	27.2911	11.6384	14.678	14.9926	0	0.00197062	0.0220736	DOWN	-1.53221
AT3G12540	1.583	0.0623566	0.139094	0.189122	0.210457	0.210918	0.913325	0.871923	0.832553	0	1.52974e-06	0.00122393	UP	2.42586
AT3G12720	1.108	0.425647	0.630734	0.293695	0.575589	0.676339	1.48041	1.63608	1.38675	0	0.000156162	0.00647862	UP	1.52831
AT3G12915	3.077	4.23101	3.20148	4.27681	4.19788	3.50365	10.1707	7.98126	8.61021	0	0.00976822	0.0546903	UP	1.2003
AT3G12965	0.374	7.88862	23.5238	6.02103	18.452	15.3749	33.2316	39.6433	38.1782	0	0.00105406	0.0159913	UP	1.37704
AT3G13170	1.089	0.312215	0.606575	0.370536	0.812891	0.729018	1.19666	1.22072	1.03312	0	0.00233791	0.0242928	UP	1.02234
AT3G13280	1.152	0.00952068	0.0415509	0.101692	0.0578393	0.135254	0.332048	0.28159	0.217646	0	0.00730787	0.0460479	UP	2.00213
AT3G13290	4.566	7.62175	7.39071	6.87318	7.75713	8.49699	19.409	18.5539	18.0689	0	2.77811e-05	0.00289027	UP	1.29191
AT3G13430	1.618	10.9475	10.5259	12.3649	11.7483	10.9644	5.78215	5.46038	5.61439	0	2.74999e-05	0.00288784	DOWN	-1.00925
AT3G13435	0.356	0.708595	3.03873	1.42597	2.21925	3.02204	5.22677	4.44886	4.38829	0	0.0028194	0.026847	UP	1.17036
AT3G13610	1.355	0.411862	0.633106	0.823311	0.335204	0.913515	4.23905	4.70707	3.89354	0.0377428	0.000884176	0.0145575	UP	2.77934
AT3G13650	0.981	1.57642	1.33695	1.12784	1.13526	1.91352	4.69896	5.2454	6.3634	0	0.00945038	0.0536527	UP	1.93867
AT3G13750	3.313	333.812	311.892	294.462	352.691	326.072	142.206	115.434	105.64	0	3.93684e-05	0.0034906	DOWN	-1.41892
AT3G13760	1.959	0.0727829	0.200361	0.0863784	0.218653	0.359809	0.665216	0.847433	0.725265	0	0.000557615	0.0116675	UP	1.99149
AT3G14020	1.241	5.68277	4.97566	8.29661	5.77564	4.01174	19.3456	17.7492	17.1214	0	2.54752e-05	0.00277944	UP	1.65251
AT3G14210	1.483	370.147	168.569	365.631	158.403	105.611	641.583	582.591	534.702	0.000194581	0.00170276	0.0204283	UP	1.32713
AT3G14260	0.95	0.0577254	0.131003	0.0685082	0.0500984	0.195254	0.225212	0.194166	0.263924	0	0.00990788	0.0551963	UP	1.18011
AT3G14400	2.712	19.6183	18.1547	20.2976	18.1213	18.4533	48.752	44.2405	45.5501	0	0.00100198	0.0155667	UP	1.28669
AT3G14510	0.964	0.0568871	0.191131	0.283556	0.350653	0.479882	0.857824	0.940606	1.01243	0.0319019	0.000235427	0.00779439	UP	1.78214
AT3G14530	1.264	0.164864	0.219641	0.545789	0.308755	0.498947	1.33874	1.45429	1.71404	0	0.00117407	0.0169038	UP	2.11173
AT3G14780	1.214	0.966686	0.670291	0.954262	0.525331	1.00843	3.55144	2.97073	3.15092	0	0.000754006	0.0134703	UP	1.96655
AT3G14850	1.269	1.65079	0.897735	1.20011	0.87761	1.33893	3.95951	3.63392	3.71348	0	6.17005e-06	0.00207338	UP	1.65954
AT3G15200	1.572	1.34103	1.3535	1.39159	1.60724	1.64712	0.776343	0.610446	0.593083	0.0183269	0.000125151	0.0059738	DOWN	-1.1535
AT3G15240	1.269	1.01122	1.4409	2.61562	2.25778	2.92926	5.83964	4.71658	5.7298	0	0.000878763	0.0145611	UP	1.4043
AT3G15450	1.051	1571.53	1498.5	1737.55	2423.81	2098.75	344.067	601.792	379.684	0.00452853	0.000490649	0.0111104	DOWN	-2.07835
AT3G15460	1.216	6.54777	4.96696	6.40517	3.51079	4.89145	10.1165	9.9512	11.9725	0.00563708	0.00173068	0.0205431	UP	1.02057
AT3G15500	1.274	66.5732	36.6627	58.5132	50.0067	38.1406	11.0889	11.1885	6.73675	0	0.00160985	0.0198887	DOWN	-2.36954
AT3G15700	1.128	0.281974	0.0933569	0.334646	0.194087	0.230219	0.56902	0.817633	0.689628	0	0.00827295	0.0495816	UP	1.60919
AT3G15720	1.515	1.36826	1.18166	1.07397	1.01156	0.837464	4.64321	4.45453	5.45292	0	0.00390896	0.0321401	UP	2.14767
AT3G15770	0.781	86.3791	52.8579	82.1847	62.877	39.1985	26.2504	25.7865	14.5289	0.00161063	0.00618871	0.0417266	DOWN	-1.54393
AT3G15780	0.568	35.7438	36.2339	37.5115	34.5053	32.9692	18.3295	15.8093	15.6535	0.00221328	1.93115e-05	0.00243051	DOWN	-1.09249
AT3G15830	0.988	0.166516	0.048448	0.0922226	0.0481715	0.0976268	0.190302	0.238201	0.188703	0	0.00540736	0.0386368	UP	1.18326
AT3G16150	1.28	0.745469	0.261771	0.538967	0.27515	0.689794	0.997832	1.3566	1.28076	0	0.00490313	0.03659	UP	1.27065
AT3G16300	0.639	0.017164	0.134836	0.101851	0.0148962	0.290283	0.618914	0.447931	0.633838	0	0.00261025	0.0258517	UP	2.34208
AT3G16320	2.352	0.918649	1.68103	1.04597	1.25054	1.56784	5.3339	4.71908	5.0595	0	3.16549e-05	0.00306551	UP	1.9622
AT3G16330	0.868	0.644423	0.496313	0.764798	0.230291	0.282083	2.3379	1.64878	2.022	0	0.00595642	0.0407242	UP	2.05025
AT3G16410	2.106	1.66152	2.38503	2.93174	2.16961	3.72596	13.4491	11.2687	9.89051	0.117912	0.00749414	0.0467049	UP	2.16364
AT3G16440	1.179	0.790725	1.01498	1.26964	1.39672	2.92632	5.30658	7.49355	6.42893	0	0.00426914	0.0337791	UP	2.11497
AT3G16510	1.303	6.52346	6.73733	7.52223	5.38394	4.06001	1.85595	2.05512	2.03772	0	0.00238378	0.0245569	DOWN	-1.6082
AT3G16660	0.751	38.8328	37.0313	32.1861	21.0273	20.2434	77.7919	65.2577	65.9415	0	0.000758227	0.0134812	UP	1.22199
AT3G16670	0.766	52.5339	7.76115	44.3345	4.75935	0.978307	220.376	223.078	166.002	0	0.00215055	0.0231254	UP	3.20218
AT3G16680	0.613	0.017892	0.0156172	0.0637026	0.015528	0.0121038	0.475941	0.487682	0.49292	0	3.07062e-08	0.000515926	UP	4.28132
AT3G16730	2.579	3.99333	3.87907	3.59861	4.21125	4.64051	9.32912	8.63949	8.48798	0	0.000142324	0.00627643	UP	1.1175
AT3G17340	3.591	4.60276	7.34462	5.1653	6.35375	7.13863	13.1311	13.1623	12.9492	0	0.000178425	0.0068838	UP	1.09561
AT3G17600	0.835	0.380919	0.103186	0.670314	0.125396	0.0799721	0.970565	0.952188	0.777631	0	0.0032092	0.0288347	UP	1.72675
AT3G17660	1.045	4.16672	3.21554	4.39698	2.52314	2.50635	7.21547	6.55539	6.82266	0	0.000335632	0.00937538	UP	1.02995
AT3G18400	0.945	3.33097	1.44866	2.41047	2.08505	2.28478	5.75614	5.37792	4.66012	0	0.00103439	0.0158142	UP	1.18723
AT3G18550	1.622	1.50791	1.11551	1.34018	1.32041	0.901152	0.371735	0.199995	0.162507	0	0.000207665	0.00740803	DOWN	-2.33753
AT3G18560	0.876	18.1921	22.9388	17.9944	26.1981	34.1591	7.9562	9.56271	7.99213	0	0.00608446	0.0412971	DOWN	-1.49064
AT3G18690	0.981	13.1443	10.1947	13.4388	13.2549	14.2187	5.33952	7.09357	6.68892	0.103169	0.000312461	0.00902057	DOWN	-1.01153
AT3G18950	1.944	6.14401	3.98396	5.18921	5.99815	3.26327	2.99156	2.13002	1.5907	0	0.0084746	0.0503057	DOWN	-1.13556
AT3G19010	1.411	41.6093	65.6021	54.8799	47.3236	40.6003	25.1386	24.4372	20.4168	0	0.00328165	0.0291891	DOWN	-1.09978
AT3G19210	2.93	0.962024	1.14684	1.07065	1.18578	1.42062	2.6708	2.48563	2.51672	0	6.39991e-06	0.00202889	UP	1.14424
AT3G19290	1.85	47.6354	42.8084	43.8265	66.409	64.3413	27.7565	22.8874	18.5593	0.00141101	0.00247748	0.0250763	DOWN	-1.20023
AT3G19320	1.482	0.185017	0.0839766	0.500637	0.122035	0.425553	0.826827	0.871259	0.941348	0	0.000945989	0.0150587	UP	1.7397
AT3G19380	1.708	14.3648	15.6323	12.9327	13.7375	10.8992	6.19869	5.49292	5.40136	0	0.000292857	0.0086936	DOWN	-1.24594
AT3G19470	1.433	3.28346	3.11985	3.13378	2.30494	3.46388	8.3836	6.92877	7.61332	0	0.00247442	0.0250679	UP	1.31984
AT3G19580	1.162	22.115	15.5464	19.3232	16.3423	14.1433	3.91123	2.50155	2.50629	0	0.000257076	0.0081575	DOWN	-2.55686
AT3G20110	1.862	0.0294517	0.272495	0.0349532	0.0460087	0.139467	0.574521	0.440666	0.521358	0	0.000590926	0.0119479	UP	2.29349
AT3G20300	1.686	29.3841	36.0505	29.9628	33.6655	31.7689	12.6937	14.2039	15.7291	0	2.11958e-05	0.00257135	DOWN	-1.17876
AT3G20370	1.396	6.30886	25.7918	9.79972	20.4897	26.9201	45.1654	45.7135	45.2926	0	0.00274313	0.0264733	UP	1.34549
AT3G20420	1.289	3.46308	4.73096	3.42328	4.49719	4.87543	1.73527	1.88993	2.48878	0	0.00145032	0.0189049	DOWN	-1.04255
AT3G20475	2.719	0.455816	0.714743	0.483513	0.857697	0.881406	1.52845	1.16264	1.50142	0	0.00696435	0.0447049	UP	1.04214
AT3G20590	0.768	0.157091	0.21191	0.186435	0.0619706	0.318812	1.71371	2.01254	1.59886	0	0.00289443	0.0272297	UP	3.24486
AT3G20600	0.891	7.61962	10.218	8.72153	7.74529	4.65497	2.56861	2.64847	2.9944	0	0.00477769	0.0360219	DOWN	-1.50929
AT3G20660	1.802	5.88562	7.07109	5.35254	9.31268	9.83657	2.75238	3.55446	3.5855	0	0.00767367	0.0473931	DOWN	-1.18394
AT3G20810	1.665	15.5921	9.99881	19.0675	13.9779	10.4677	4.4196	5.48197	4.71455	0	0.00529334	0.0381138	DOWN	-1.50424
AT3G20940	1.724	0.566204	0.627486	0.883374	0.380968	1.00277	1.59828	1.51637	1.46553	0	0.000980789	0.0153796	UP	1.14126
AT3G21080	1.054	0.0520295	0.0454143	0.160546	0.0451551	0.0492765	1.01495	1.05608	1.23821	0	0.00205325	0.0225703	UP	3.96809
AT3G21180	3.771	0.18905	0.13455	0.238171	0.123685	0.194788	0.565641	0.676374	0.496107	0	0.00835957	0.0498518	UP	1.71852
AT3G21510	0.784	30.1475	19.3542	28.1085	21.2835	16.4008	128.799	137.102	128.816	0	7.54354e-07	0.00115224	UP	2.51246
AT3G21530	1.6	5.47033	3.21968	5.34092	3.2735	2.67689	8.65037	6.81024	9.12053	0.0238625	0.00723973	0.0458421	UP	1.03587
AT3G21710	1.227	8.55437	5.51617	10.1735	8.6188	8.30249	26.6151	29.2008	22.8392	0	0.00440423	0.0343706	UP	1.67108
AT3G21770	1.237	7.70496	9.37211	11.8801	9.61103	11.1145	22.5739	23.4114	23.8187	0	6.32555e-06	0.00206373	UP	1.22753
AT3G21860	0.459	0.0716851	0.104285	0.19851	0.0207379	0.0161648	1.51138	1.67676	1.61073	0	1.51395e-05	0.0022511	UP	4.28111
AT3G22090	0.542	0.344009	0.30027	0.216142	0.368805	0.561264	0.0598098	0.152561	0.0593075	0	0.00689608	0.0444279	DOWN	-1.98342
AT3G22240	0.535	15.519	23.8483	23.8434	26.9192	27.5257	50.528	61.9282	49.3015	0.0582011	0.00576766	0.0400282	UP	1.19623
AT3G22550	1.483	3.97149	4.57687	7.29384	3.71633	3.53721	12.6039	10.0234	9.49817	0	0.00645664	0.042744	UP	1.21306
AT3G22600	0.79	24.7262	6.7498	12.2092	11.5309	10.7913	29.6348	28.4618	26.7004	0	0.00616468	0.0416482	UP	1.09835
AT3G22620	0.868	12.112	4.04652	7.68502	5.37548	7.79853	16.405	19.4052	16.845	0.016103	0.000885635	0.0145672	UP	1.24533
AT3G22961	0.672	10.7883	8.10599	9.31691	9.84448	10.6105	0.95514	0.955986	1.11932	0	4.82947e-05	0.00390119	DOWN	-3.26835
AT3G23090	1.365	2.64353	4.31326	3.88113	5.41833	6.57168	10.0552	12.0828	9.95189	0	0.00122472	0.0173213	UP	1.22829
AT3G23110	2.508	0.389209	0.354992	0.565712	0.330194	0.204129	1.14519	1.2351	1.39191	0	0.000363707	0.00972317	UP	1.76935
AT3G23175	0.942	3.45801	1.41263	2.88796	2.17253	2.59136	9.76636	10.3917	8.19654	0	0.002095	0.0227833	UP	1.91603
AT3G23430	2.713	8.46136	11.6764	11.9035	13.4202	14.2239	29.2672	27.2923	22.2821	0	0.0089078	0.0517796	UP	1.13854
AT3G23470	1.467	1.83171	1.38999	2.54653	1.52481	2.39229	10.3283	10.1674	10.1276	0	1.09725e-06	0.00122906	UP	2.39773
AT3G23480	1.76	6.84938	12.6575	8.43858	10.2389	8.28385	4.99146	3.97177	2.58277	0.00010552	0.00423977	0.0336419	DOWN	-1.27188
AT3G23800	1.621	1.157	0.998083	1.21252	0.827968	1.67068	7.86724	8.12637	7.18248	0	0.000224437	0.00765685	UP	2.71909
AT3G23810	1.849	37.3879	42.6477	37.1771	22.3476	31.7852	71.3803	67.6895	78.3398	0	0.000238831	0.00785292	UP	1.08047
AT3G23840	1.445	11.6813	14.8602	12.7824	11.5344	11.8252	5.60397	6.42224	6.25097	0	0.000177593	0.0068754	DOWN	-1.04108
AT3G23870	1.553	1.19516	0.772039	1.48354	0.851963	1.04686	2.23349	2.40417	2.51464	0.00194287	0.000133465	0.00607717	UP	1.15595
AT3G23880	1.177	19.4455	18.2907	19.7405	21.2775	16.5595	8.55453	10.5866	8.73151	0.00256194	8.50621e-05	0.00499725	DOWN	-1.03687
AT3G24020	0.919	4.97382	4.12337	6.10994	4.38668	4.95165	12.1228	10.5087	10.1225	0.072371	0.00235698	0.0244306	UP	1.15318
AT3G24180	3.626	12.9491	11.6776	12.0796	11.3537	11.7106	27.051	27.0195	24.7601	0	0.000999049	0.015557	UP	1.13629
AT3G24210	2.329	0.315519	0.234298	0.195612	0.282005	0.442821	1.18867	1.03507	1.1566	0	4.71129e-05	0.00386142	UP	1.93807
AT3G24240	3.771	1.2361	0.997698	2.37135	1.18384	2.11905	5.3521	5.04835	4.51611	0	0.000123472	0.00595289	UP	1.65249
AT3G24310	1.049	0.637786	0.556695	0.930641	0.662407	0.841693	2.08284	1.82512	2.02858	0	8.65689e-05	0.00505045	UP	1.44693
AT3G24900	2.655	0.020655	0.032452	0.0833452	0.0322667	0.0140108	0.109888	0.0838499	0.0895934	0.00337846	0.00738588	0.0462878	UP	1.36974
AT3G25250	1.504	0.444839	0.362819	0.666406	0.436695	0.833722	2.51317	3.03229	2.97936	0	0.000902809	0.0146702	UP	2.3721
AT3G25655	0.534	0.267007	0.161348	0.414385	0.0891263	0.0138944	0.594917	0.631297	0.44545	0	0.00677182	0.0439391	UP	1.5587
AT3G25730	1.328	5.88285	2.48927	7.03551	2.28856	2.25159	11.8629	12.7161	10.9263	0.00183386	0.000659486	0.0126132	UP	1.56877
AT3G25790	1.195	2.12014	1.434	2.25475	2.30201	1.13623	4.99681	4.51897	4.48142	0	6.75525e-05	0.00454007	UP	1.33503
AT3G25900	1.366	4.52041	3.77747	5.63162	4.27156	4.35075	11.6426	11.8971	12.1001	0	2.14778e-06	0.00138796	UP	1.39721
AT3G25930	0.734	4.19885	5.4388	6.0472	7.84579	10.0984	16.1378	21.2396	16.9132	0	0.00491254	0.0366358	UP	1.42796
AT3G26000	2.342	25.5644	19.6816	21.0699	22.6014	22.5979	10.9044	11.1101	9.50553	0.000512953	6.0521e-05	0.00427258	DOWN	-1.08594
AT3G26280	1.712	62.4436	62.2993	54.5525	59.5752	47.5732	22.9001	19.0113	12.426	0	0.000220451	0.0075902	DOWN	-1.66127
AT3G26310	1.503	14.164	20.0065	11.9946	16.0165	14.2617	9.26998	6.52143	6.95933	0	0.00292782	0.0273676	DOWN	-1.01151
AT3G26440	2.068	3.22989	2.76367	4.04722	4.45095	4.02196	8.60584	8.57822	7.84964	0	2.55402e-05	0.00277752	UP	1.17224
AT3G26470	1.454	5.42448	7.24216	8.05385	8.54822	7.96432	20.8601	18.7596	17.3042	0.0536343	0.00178007	0.0208714	UP	1.34942
AT3G26510	1.862	108.506	75.656	117.212	104.128	87.8282	24.015	32.9338	24.2898	0	0.000271484	0.00835435	DOWN	-1.86535
AT3G26590	1.786	5.71727	6.97363	6.24591	4.50352	5.15552	19.6933	14.826	17.2962	0	0.00938408	0.0533846	UP	1.59454
AT2G29630	2.639	138.251	124.301	139.808	122.697	84.2082	66.5756	50.9597	33.3091	0.000295225	0.0027637	0.0265879	DOWN	-1.27704
AT3G26830	1.66	0.0858926	0.213381	0.744924	0.0974806	0.236892	1.1756	1.17633	1.15798	0	0.00176763	0.0207982	UP	2.08523
AT3G26910	2.327	12.5138	16.0899	17.6705	15.6545	12.3618	5.78127	6.13101	5.92058	0	0.000966965	0.015241	DOWN	-1.32168
AT3G26922	1.603	2.2233	2.94226	3.4343	3.85251	3.54946	7.24852	6.84816	7.76492	0.0132591	7.05185e-05	0.00455713	UP	1.18713
AT3G26930	1.449	0.0382592	0.1806	0.0634436	0.11309	0.0570642	0.285558	0.342963	0.301183	0.0146476	0.000396101	0.0102389	UP	1.77596
AT3G26960	0.836	3.50288	2.64526	2.63134	1.7876	1.83716	5.5605	6.41388	6.91341	0	0.00106011	0.0160035	UP	1.34359
AT3G27040	1.077	0.987817	1.09333	1.12399	0.839625	0.709584	0.439449	0.194894	0.196987	0	0.00164199	0.0200864	DOWN	-1.77879
AT3G27070	0.986	0.0556178	0.12622	0.198021	0.183423	0.218225	0.53261	0.677348	0.593339	0	0.00100002	0.0155577	UP	1.94327
AT3G27150	1.632	0.329304	0.26397	0.566284	0.495765	0.495552	2.15715	1.74995	1.61117	0	0.00742861	0.0464343	UP	2.09626
AT3G27190	1.871	5.35202	4.3543	7.60401	5.94727	5.98409	16.2968	14.5604	13.8028	0	0.000540656	0.0115061	UP	1.34792
AT3G27220	1.495	8.37076	5.16768	11.7802	4.285	5.52378	24.0123	21.7963	20.9725	0	9.14786e-05	0.00518389	UP	1.66381
AT3G27500	2.249	0.0829049	0.123444	0.00578771	0.207388	0.0560844	0.740875	0.647657	0.66033	0	1.60011e-05	0.00224042	UP	2.84394
AT3G27580	2.483	10.6056	4.73847	8.35094	5.37846	5.06495	19.9724	18.8411	23.4605	0	0.00085293	0.0142952	UP	1.6042
AT3G27650	0.93	3.07807	1.67791	2.67329	2.58949	2.17802	9.40438	7.85844	8.01197	0	0.00171403	0.0205122	UP	1.78816
AT3G26740	0.712	2969.37	3129.95	2704.68	3437.81	2714.14	1214.57	1433.99	872.592	0	0.000514389	0.011387	DOWN	-1.34964
AT3G28080	1.354	5.92133	8.22288	7.04663	5.96851	4.7729	14.6666	12.9984	13.0905	0	0.000153549	0.00644984	UP	1.08895
AT3G28330	1.05	0.0522277	0.154997	0.0123967	0.190374	0.0918621	0.376653	0.442214	0.410227	0	0.00020429	0.00735795	UP	2.02921
AT3G28740	1.597	29.53	59.0683	28.4531	30.6132	36.846	7.04762	5.43638	4.69703	0.00777748	0.0052374	0.0378978	DOWN	-2.68785
AT3G28880	2.498	0.696317	0.471385	0.640927	0.590434	0.631974	2.069	1.65474	1.8651	0.0481702	0.00511173	0.03744	UP	1.6197
AT3G29430	1.333	0.00822793	0.035909	0.00976486	0.0071408	0.00556612	0.0632287	0.0906615	0.0819894	0	0.00278495	0.0266853	UP	2.56123
AT3G29635	1.377	0.167265	0.118189	0.0472642	0.0898642	0.242472	0.437875	0.448061	0.42486	0	0.000629338	0.012353	UP	1.71586
AT3G29670	1.479	5.86582	10.6996	7.6656	12.4406	13.6804	1.8455	2.41265	2.06473	0	0.00519864	0.0377149	DOWN	-2.25643
AT3G29680	1.384	3.11442	6.08017	4.07238	5.17888	4.47644	1.52247	1.64071	1.51897	0	0.0036986	0.0311654	DOWN	-1.55454
AT3G29780	0.449	2.36944	2.75047	3.85568	2.64997	2.36305	9.51569	8.62721	8.00395	0	0.00058266	0.0118521	UP	1.63935
AT3G30180	1.784	15.0808	9.4821	12.9363	7.7206	5.88497	19.948	27.842	26.8076	0	0.0088631	0.0516269	UP	1.28264
AT3G30730	0.204	1.23657	0.98549	0.446647	0.793224	0.691044	2.06578	2.08903	2.55266	0	0.00138689	0.0184428	UP	1.42859
AT3G30770	1.812	0.054476	0.00528329	0.00718353	0.00525314	0.0450419	0.0894506	0.0947774	0.102891	0	0.00158888	0.0197532	UP	2.02918
AT3G30841	1.722	4.8852	4.55317	4.99648	4.60457	4.90764	14.6874	13.2421	13.2797	0	0.00212958	0.0229735	UP	1.52008
AT3G32030	1.815	0.320273	0.216257	0.0645449	0.215023	0.437411	3.11845	2.85615	2.40509	0	0.00382674	0.0317359	UP	3.47789
AT3G32047	1.509	0.268926	0.209357	0.232901	0.220778	0.339268	0.829219	0.813518	0.754089	0	7.35567e-06	0.00204281	UP	1.65187
AT3G32980	1.414	44.8409	46.7089	55.684	65.3047	61.2094	167.591	166.253	130.184	0	0.00902493	0.0522255	UP	1.49833
AT3G42860	1.459	2.65363	2.0144	2.57833	1.7028	1.90703	5.88792	4.73014	4.85144	0	0.00495802	0.0367466	UP	1.24787
AT3G43600	4.268	8.43824	9.47239	8.4815	9.1284	9.97687	20.9148	21.522	20.9017	0.00019539	4.69145e-08	0.000394129	UP	1.21426
AT3G44510	1.19	0.562216	0.603361	2.43924	0.663909	0.480094	3.49231	3.191	2.83629	0	0.0022685	0.0238668	UP	1.7403
AT3G44540	1.725	1.02366	1.28199	1.7129	1.59473	2.25815	3.51418	4.25885	4.06607	0	0.000523886	0.0113725	UP	1.32583
AT3G44550	1.671	0.767945	0.853636	0.646544	1.49815	1.72725	10.309	13.3721	11.0304	0	0.00555358	0.0392807	UP	3.39657
AT3G44630	4.417	27.0369	50.6359	34.8951	35.7267	24.2354	13.52	9.55387	7.93207	0.0514791	0.00444955	0.0345957	DOWN	-1.73927
AT3G44720	1.693	30.1178	31.8979	27.2402	17.7386	17.3329	12.2583	10.3881	9.37568	0	0.00835867	0.0498553	DOWN	-1.22004
AT3G44765	0.895	0.0612728	0.246019	0.101805	0.372239	0.339894	0.68818	0.788859	0.610569	0	0.00121572	0.0172595	UP	1.63373
AT3G44790	0.975	0.101241	0.16692	0.120153	0.205018	0.433763	0.472123	0.554515	0.652784	0	0.00475207	0.0359335	UP	1.44636
AT3G44798	0.72	14.4257	14.4797	13.5047	20.4255	14.0458	8.34735	7.76525	6.31285	0	0.0018938	0.0216387	DOWN	-1.04053
AT3G44800	1.695	0.265298	0.118608	0.0844732	0.117931	0.0569057	0.355725	0.273938	0.322395	0	0.00475671	0.0359201	UP	1.30271
AT3G44805	0.747	0.0734125	0.166604	0.0871256	0.0637128	0.00993258	0.199622	0.212872	0.197946	0	0.00733626	0.0461317	UP	1.34398
AT3G45060	1.835	0.820792	0.569841	1.00142	0.38924	0.271303	1.81616	1.35128	1.35149	0.00238154	0.00799453	0.0486241	UP	1.30291
AT3G45080	0.999	0.054894	0.0479146	0.273621	0.276318	0.12626	0.343963	0.426588	0.495523	0	0.00790521	0.048317	UP	1.43762
AT3G45300	2.886	69.2827	40.6878	74.6594	70.9736	46.1658	21.2327	24.404	15.8379	0.0811066	0.00321387	0.0288381	DOWN	-1.55842
AT3G45330	2.049	0.0802916	0.0607385	0.0825843	0.0975561	0.0543165	0.268954	0.301113	0.298071	0	4.7148e-05	0.0038549	UP	1.94613
AT3G45640	1.483	171.987	174.973	249.368	157.697	96.9155	43.154	47.7239	42.202	0	0.00650875	0.0429452	DOWN	-1.9398
AT3G45700	1.829	0.377787	0.183197	0.362955	0.452775	0.620669	0.691229	0.852024	0.854144	0	0.00420787	0.0334519	UP	1.00032
AT3G45730	0.603	73.6099	70.8553	97.2033	99.5911	74.2825	34.5458	41.2544	27.1977	0	0.00063619	0.0124149	DOWN	-1.27542
AT3G46240	1.305	0.00840446	0.00733588	0.00997437	0.00729402	0.00568554	0.0248405	0.0243702	0.0246319	0	1.08737e-05	0.00216212	UP	1.6693
AT3G46270	1.673	0.0812396	0.17739	0.178949	0.538611	0.119743	1.76945	2.1803	1.53103	0.473317	0.00583541	0.0403235	UP	3.05919
AT3G46500	1.212	1.22166	0.813575	0.912877	0.777517	1.30395	4.52018	3.50044	3.60169	0	0.0072748	0.045917	UP	1.94535
AT3G46540	1.213	38.1478	40.4479	35.8519	31.177	31.9846	87.0846	77.9477	91.2717	0	0.00180116	0.0209868	UP	1.26612
AT3G46600	2.042	144.435	101.392	150.927	114.061	79.2651	19.7962	24.4301	24.6988	0	0.00191284	0.0217159	DOWN	-2.36084
AT3G46720	1.419	0.3169	0.33058	0.339403	0.422606	0.915036	1.77733	1.77057	1.554	0	0.00010233	0.00542381	UP	1.87107
AT3G46800	2.049	0.00535277	0.023361	0.00635264	0.00464553	0.0181055	0.0791042	0.0651893	0.0533391	0	0.00674958	0.0438455	UP	2.51021
AT3G46810	2.388	0.0321502	0.100223	0.0490574	0.115595	0.114961	0.230773	0.210422	0.239604	0	0.000450716	0.0108262	UP	1.4616
AT3G46900	0.636	10.7781	11.786	14.265	10.6711	6.54468	22.0904	22.6522	22.0059	0	0.000648833	0.0124876	UP	1.04154
AT3G46960	4.175	8.43516	9.50455	8.82796	10.0847	10.8326	20.2208	20.0899	18.6731	0.0146128	2.88347e-05	0.00291856	UP	1.04375
AT3G47080	2.026	20.1329	26.5322	21.8121	33.494	36.7063	13.994	13.0572	11.7504	0	0.00906671	0.0523681	DOWN	-1.10058
AT3G47200	1.651	0.3388	0.330515	0.386318	0.305567	0.795442	1.60612	1.81457	1.4836	0	0.000238915	0.00784799	UP	1.92222
AT3G47210	1.852	0.55076	0.852915	0.625526	0.64246	1.0216	1.45981	1.70006	1.43367	0	0.000924822	0.014884	UP	1.05167
AT3G47220	2.058	0.261139	0.23724	0.613511	0.291389	0.537184	1.52791	1.20846	1.06524	0	0.00851261	0.0504155	UP	1.70717
AT3G47340	2.474	488.343	530.035	446.325	955.482	855.756	169.414	212.582	108.057	0	0.00746888	0.0466081	DOWN	-2.00393
AT3G47400	2.054	0.945134	0.806322	1.07098	0.579278	0.957256	2.37682	2.35659	2.20036	0	7.73788e-06	0.00208019	UP	1.40662
AT3G47710	0.279	0.0393112	0.034313	0.419889	0.0341172	0.345718	1.13866	1.34508	1.54386	0	0.00112588	0.0165142	UP	2.94226
AT3G47720	1.178	0.142013	0.00812677	0.794753	0.00808038	0.108303	4.91921	3.75754	4.1739	0.0214488	0.00225791	0.0238001	UP	4.33494
AT3G47740	2.799	0.0195924	0.0786662	0.0883582	0.0510112	0.0556671	0.44705	0.552208	0.406545	0	0.00737749	0.046287	UP	2.99794
AT3G47760	2.619	0.020939	0.0182767	0.0248502	0.0254413	0.002833	0.116349	0.119004	0.130101	0	7.24511e-06	0.00208089	UP	2.72162
AT3G47780	2.87	0.691699	1.0574	0.76648	0.978402	1.54856	4.24017	4.97103	3.85064	0	0.00319418	0.0287305	UP	2.1101
AT3G47800	1.444	104.184	111.403	95.7222	125.369	109.812	41.0702	44.6435	40.4316	0.0175248	7.9876e-05	0.00488028	DOWN	-1.37814
AT3G47820	1.733	6.33514	7.65093	7.48846	6.27805	6.88018	3.28097	3.25555	2.92696	0	5.26367e-05	0.00403836	DOWN	-1.13473
AT3G47980	1.097	1.32974	1.38757	1.19843	1.48377	2.07642	8.30369	7.068	6.45237	0	0.00559007	0.0393813	UP	2.28256
AT3G48260	1.551	1.36479	3.67255	2.15684	2.11731	3.48737	6.75927	8.08303	7.31596	0	0.000211921	0.00746478	UP	1.52879
AT3G48280	1.649	3.94416	5.60234	3.32321	2.49945	3.08214	1.75747	0.59016	0.994164	0	0.00662251	0.0433215	DOWN	-1.72806
AT3G48360	1.439	597.468	530.112	558.753	708.782	748.187	48.8889	69.8695	77.232	0	0.000128724	0.00604987	DOWN	-3.26646
AT3G48380	2.204	21.3236	20.4541	21.5387	25.6495	21.5553	11.7577	11.6332	9.76299	0	6.07649e-05	0.0042808	DOWN	-1.0001
AT3G48540	0.699	1.64944	2.20633	1.06253	1.43044	2.1778	4.47502	4.44407	5.29107	0.00397728	0.0006413	0.0124209	UP	1.47386
AT3G48620	1.116	0.167073	0.0772043	0.104972	0.0597051	0.0864294	0.296283	0.256477	0.293795	0	0.000187088	0.00707189	UP	1.51002
AT3G48690	1.188	153.656	125.932	143.028	132.228	100.338	70.1901	55.9674	43.4494	0.000541329	0.000873497	0.0145096	DOWN	-1.21273
AT3G49630	0.999	0.0329364	0.00958291	0.169717	0.00952822	0.00742706	0.292044	0.324716	0.26385	0.00212317	0.000542134	0.0114939	UP	2.67891
AT3G49650	3.001	4.54282	3.51224	3.03185	3.87282	3.92368	8.82958	8.00959	8.02706	0	6.14727e-05	0.00427687	UP	1.13403
AT3G49780	0.433	106.917	77.2278	112.82	61.8385	69.6897	32.7762	38.2665	39.9841	0	0.00777036	0.0477359	DOWN	-1.2114
AT3G49790	1.713	72.7667	60.6646	65.2044	72.2209	66.3782	16.7629	20.3815	16.5096	0	2.05293e-06	0.00137973	DOWN	-1.91503
AT3G49860	0.682	1.36696	1.5862	1.04972	1.57714	2.44783	4.40147	4.15026	4.11942	0	0.000125411	0.00597776	UP	1.39543
AT3G49970	1.581	5.57063	3.13056	5.1457	4.23254	1.71295	8.35335	9.14464	6.64851	0	0.00949086	0.0537283	UP	1.02384
AT3G50130	1.746	0.106789	0.126109	0.186377	0.169003	0.208226	0.4196	0.426227	0.342434	0	0.00202995	0.022439	UP	1.31407
AT3G50150	1.699	0.0322773	0.0732509	0.0689518	0.0280126	0.0131012	0.20988	0.265806	0.283796	0	0.00293441	0.0273987	UP	2.55367
AT3G50200	0.696	0.267892	0.426398	0.130914	0.287202	0.309151	0.661379	0.594023	0.692773	0	0.000628721	0.0123553	UP	1.19162
AT3G50230	1.983	0.105171	0.255868	0.361024	0.0816025	0.11599	0.820924	0.574156	0.638678	0.000841626	0.00526825	0.0380147	UP	1.88195
AT3G50300	1.452	0.581627	0.982387	0.510981	0.714557	0.965779	2.41564	2.96566	2.90896	0	0.00143981	0.0188482	UP	1.87944
AT3G50350	1.058	2.56054	2.36166	2.32526	3.1759	1.71816	6.19536	5.82556	5.20755	0	0.000484523	0.0110536	UP	1.24181
AT3G50460	0.618	0.0177473	0.108436	0.0210624	0.0770121	0.156076	0.283254	0.442567	0.364098	0	0.00922631	0.052908	UP	2.25585
AT3G50640	0.749	2.299	1.46987	4.29251	2.3765	4.2497	10.8287	11.337	11.3901	0	5.09634e-05	0.00397349	UP	1.92893
AT3G50840	2.135	12.0877	16.2627	10.2974	16.1795	13.4456	6.76883	7.30205	5.93509	0.00571429	0.00255537	0.025496	DOWN	-1.03392
AT3G50950	2.904	42.3459	63.2263	57.6522	46.5095	33.9676	16.898	18.4226	15.064	0.0227115	0.00320575	0.0288191	DOWN	-1.53709
AT3G51130	1.571	30.5158	23.4969	29.6125	26.0234	21.8338	79.736	72.5094	68.312	0.000282527	0.000987138	0.0154431	UP	1.48325
AT3G51180	2.039	0.586313	0.568108	0.517087	0.630222	0.60769	1.80924	1.76874	1.60487	0	0.0014059	0.0185853	UP	1.56998
AT3G51325	0.704	5.49949	1.67261	4.08616	6.58466	3.9733	0.524933	0.731832	0.31962	0	0.00918562	0.0528189	DOWN	-3.05374
AT3G51340	1.841	0.768522	0.785211	0.643404	0.977204	0.842316	3.12371	2.80199	2.63652	0	0.00183411	0.0212823	UP	1.82896
AT3G51380	0.312	2.21466	3.03769	1.96083	1.31187	1.83113	4.05211	4.50544	3.93566	0	0.000790002	0.0137479	UP	1.00762
AT3G51460	2.379	17.5144	17.6915	16.4855	16.3331	19.1588	34.6866	37.5434	34.0471	0.000317233	0.000725037	0.0132055	UP	1.02267
AT3G51480	3.338	3.45332	4.01231	3.31848	3.58382	3.28304	9.6396	8.19918	8.49873	0.00140699	0.0039721	0.0323741	UP	1.31434
AT3G51500	0.615	51.0584	39.6476	48.2777	45.0551	40.3797	19.9983	21.109	22.7992	0	0.0001729	0.00681939	DOWN	-1.07519
AT3G52060	1.755	76.2748	78.6868	71.9063	114.523	121.289	37.3302	39.5446	33.7272	0	0.00547472	0.0389277	DOWN	-1.32767
AT3G52400	1.336	39.939	51.5856	60.0457	35.346	27.7514	9.77845	10.0884	9.53272	0	0.00452798	0.0348987	DOWN	-2.13127
AT3G52800	1.129	71.7232	77.4091	78.0186	66.4285	53.817	18.8414	19.2621	17.9088	0	0.000311272	0.00900946	DOWN	-1.8958
AT3G52870	1.699	43.9423	56.9385	40.8731	49.8569	47.8673	19.328	19.8531	19.143	0	0.000464385	0.0109357	DOWN	-1.30076
AT3G53200	0.929	0.3896	0.195795	0.238193	0.0512308	0.00798669	1.17943	1.41727	1.00344	0	0.00349033	0.0301359	UP	2.76485
AT3G53232	0.446	0.713155	1.2235	0.729628	0.875037	0.948249	0.0726836	0.242445	0.418025	0	0.00472668	0.035806	DOWN	-1.87742
AT3G53310	1.355	5.98171	7.58095	5.60048	7.46743	8.48193	3.43069	3.1498	2.93691	0	0.00139491	0.0184836	DOWN	-1.14638
AT3G53960	2.066	22.8859	31.2639	18.9704	23.207	25.3941	10.0263	7.97694	6.41337	0	0.00050654	0.0113101	DOWN	-1.58068
AT3G54200	0.896	20.479	25.91	20.0333	14.6286	17.5637	10.1375	8.88073	9.98063	0	0.0048866	0.0365153	DOWN	-1.02884
AT3G54530	1.306	0.0923783	0.0659724	0.169435	0.00728843	0.278378	0.491466	0.569826	0.467648	0	0.000466763	0.010938	UP	2.05447
AT3G54770	1.004	1.60585	1.17283	2.29475	1.10925	2.20963	12.2887	10.713	9.90593	0	0.00246766	0.0250221	UP	2.70825
AT3G54930	1.924	2.74196	3.07003	2.88881	2.1422	2.24054	7.12026	6.45649	6.73968	0	1.56389e-05	0.00226522	UP	1.37186
AT3G55080	1.588	15.9337	13.8958	14.8445	15.1832	14.1057	6.86307	6.14032	6.59492	0	1.69588e-06	0.00123888	DOWN	-1.17911
AT3G55150	2.055	0.304217	0.405294	0.411716	0.393717	0.40799	0.949633	0.795464	0.772723	0	0.00794346	0.0484714	UP	1.12583
AT3G55230	1.099	4.34122	3.77184	4.55994	4.09676	5.67781	12.6305	13.7688	11.2024	0	0.00295001	0.0275138	UP	1.4812
AT3G55430	1.768	52.9967	75.0218	58.4346	56.0515	48.2066	20.7519	24.4459	29.4429	0	0.000817095	0.014009	DOWN	-1.22459
AT3G55677	0.594	0.0184644	0.0161167	0.0219134	0.0160247	0.012491	0.0545739	0.0535406	0.0541156	0	1.08737e-05	0.00213684	UP	1.6693
AT3G55840	1.872	2.90214	3.62687	3.67937	3.09495	2.20887	0.743909	0.755382	1.2008	0.242265	0.000451485	0.0108292	DOWN	-1.78536
AT3G55970	1.387	5.40088	3.95495	5.09588	4.98925	4.26348	2.24838	1.66467	0.959473	0	0.00227502	0.0239055	DOWN	-1.54545
AT3G55980	2.153	106.331	103.608	128.225	60.2909	37.7392	5.31498	6.36062	7.43821	0	0.00811488	0.0491072	DOWN	-3.77532
AT3G56570	1.596	4.33628	3.06515	4.64062	2.76137	3.79815	7.61675	6.34069	8.42287	0	0.00915023	0.0526785	UP	1.00377
AT3G56880	1.051	160.427	121.976	197.057	118.744	104.136	12.4424	18.2709	19.7394	0	0.00169504	0.0203939	DOWN	-3.0622
AT3G56950	1.215	9.28141	8.09426	10.3236	8.40261	8.72624	16.482	18.6832	18.7187	0.0342524	0.0013664	0.0183446	UP	1.00242
AT3G57010	1.466	4.82554	5.62254	4.19975	5.30475	8.50778	10.7157	11.6149	12.336	0	0.000574601	0.0118242	UP	1.02156
AT3G57130	1.794	0.397385	0.442913	0.442592	0.535891	0.368087	1.33354	1.2161	1.13599	0	0.00111931	0.0164898	UP	1.49001
AT3G57157	0.237	4.85916	2.86796	4.33885	1.88767	2.22276	9.49254	9.04442	8.59903	0	0.000195941	0.00718037	UP	1.48328
AT3G57400	1.796	32.1035	35.1748	28.9684	28.1692	24.7744	13.5768	12.5902	11.8231	0.000649655	0.000361954	0.00972272	DOWN	-1.23649
AT3G57440	1.125	0.107241	0.161683	0.219835	0.380748	0.349547	1.03158	1.07989	1.09149	0	3.13136e-05	0.00305891	UP	2.13061
AT3G57530	2.201	71.3133	92.3276	89.4127	69.1824	52.6723	14.4661	14.2789	14.6893	0	0.00113041	0.0165301	DOWN	-2.37267
AT3G57930	1.262	42.4721	41.1835	49.663	29.3933	28.0735	14.4309	17.6656	22.4299	0	0.00598538	0.0408474	DOWN	-1.06996
AT3G57950	0.546	0.462015	0.438339	0.882075	0.540439	0.747399	2.00676	1.52608	1.66022	0	0.0041971	0.0334058	UP	1.49519
AT3G58000	0.528	3.7598	3.28177	2.83505	2.93854	3.47093	0.871818	0.85531	0.864496	0	0.000146819	0.00632526	DOWN	-1.91475
AT3G58270	1.249	2.30948	1.98518	1.4486	2.4616	3.15438	4.92612	4.57822	5.36859	0	0.000337595	0.00940674	UP	1.12579
AT3G59060	2.074	109.504	146.826	100.273	152.35	149.391	44.9616	55.8624	51.7817	0	0.00124073	0.0174376	DOWN	-1.37206
AT3G59080	2.042	18.7506	24.3365	17.944	13.411	10.9986	2.18123	3.19277	3.97007	0	0.00305584	0.028057	DOWN	-2.45584
AT3G59100	5.766	6.21054	4.11258	5.49693	4.42918	4.7341	19.06	19.6632	18.3067	0	1.0761e-06	0.00124695	UP	1.92772
AT3G59220	1.057	8.41524	4.86365	8.68181	4.22353	3.40447	21.83	20.3215	15.2239	0	0.00822458	0.0494505	UP	1.69235
AT3G59350	1.905	60.0668	93.105	81.7549	60.9146	49.4915	15.1823	23.7363	29.1546	0	0.00252125	0.0252908	DOWN	-1.60586
AT3G59510	1.26	0.896576	0.433079	0.69215	0.611916	0.724298	0.283005	0.247357	0.280628	0	0.00556556	0.0393323	DOWN	-1.31289
AT3G59570	2.631	1.38817	1.77203	1.4199	1.37842	1.37338	3.0581	3.14525	3.10573	0	7.89468e-06	0.00208892	UP	1.08142
AT3G59800	0.905	23.8868	17.6763	25.8174	24.0544	22.8656	49.6247	45.7613	47.4888	0	9.74539e-06	0.00227419	UP	1.05889
AT3G59850	1.389	0.434291	0.158522	0.609126	0.21244	0.400628	1.16225	0.975386	1.15249	0	0.000356928	0.00963389	UP	1.59513
AT3G59940	1.54	191.632	213.354	183.696	287.668	285.669	91.2124	122.883	113.139	0.0350217	0.00363856	0.0308063	DOWN	-1.09127
AT3G60280	0.914	0.059999	0.261853	0.469963	0.114558	0.138002	0.773182	0.842051	0.626012	0	0.00166616	0.0202348	UP	1.83863
AT3G60420	2.076	5.43636	7.30912	5.64929	6.39623	4.63548	1.00873	1.14283	0.746326	0	0.000243711	0.00791273	DOWN	-2.60708
AT3G60530	1.096	229.033	157.41	238.015	261.547	165.215	78.8949	104.236	71.1816	0	0.00210254	0.0228284	DOWN	-1.31042
AT3G60620	1.689	10.2925	9.89074	8.37715	9.54123	9.25587	22.6208	20.9949	20.2917	0	0.000687335	0.0128819	UP	1.16936
AT3G60647	0.198	1.49561	0.338451	1.24906	1.298	0.412202	5.59928	6.00725	5.55226	0	3.36368e-06	0.00152748	UP	2.57681
AT3G60650	0.324	2.87736	0.502304	2.3703	2.2034	0.572503	9.06472	7.67593	7.91711	0	7.55293e-05	0.00470016	UP	2.26909
AT3G60670	1.018	3.00592	5.72707	2.87694	6.29281	5.51735	1.10179	1.04344	1.25674	0	0.0077811	0.0477843	DOWN	-2.04634
AT3G60710	0.963	0.14806	0.0894704	0.337917	0.227342	0.161799	0.666515	0.574635	0.647566	0	0.000138925	0.00620803	UP	1.70639
AT3G60900	1.88	1.07928	1.18648	1.14241	0.85567	1.18793	2.54162	2.35817	2.36297	0	1.11128e-05	0.00205184	UP	1.15076
AT3G61060	1.378	63.4454	70.3172	48.4751	74.5882	68.3731	18.7264	12.3273	10.9755	0.326324	8.2343e-05	0.00493236	DOWN	-2.21489
AT3G61080	1.219	40.8388	44.5986	43.9603	45.3439	37.4253	25.575	20.6133	15.5299	0.0140634	0.00632568	0.042319	DOWN	-1.04447
AT3G61260	0.891	170.795	241.31	178.594	264.397	251.31	84.1675	111.671	109.941	0	0.00199351	0.0222115	DOWN	-1.11835
AT3G61270	1.783	0.916549	0.746322	1.18996	1.2866	1.95998	3.29805	3.12858	3.37131	0	0.000281177	0.008497	UP	1.42077
AT3G61300	3.05	0.0972627	0.0974712	0.175213	0.128147	0.12909	0.244683	0.273398	0.28048	0.00181964	0.000236944	0.00781379	UP	1.08548
AT3G61410	1.212	1.05878	0.785029	2.11856	1.20293	0.938154	3.48752	2.60827	2.63828	0.00392411	0.00774871	0.0476638	UP	1.25399
AT3G61660	0.39	0.365594	0.122735	0.166879	0.0244069	0.0951235	0.448849	0.538206	0.511018	0	0.00225678	0.0238031	UP	1.68829
AT3G61730	1.065	0.0308953	0.0449452	0.0122221	0.00893774	0.0209004	0.0669645	0.0895862	0.0905483	0	0.00259487	0.0257373	UP	1.80448
AT3G61820	1.827	13.9454	19.7073	16.0944	15.4998	14.9408	39.3509	35.7928	31.5887	0	0.00531264	0.0381874	UP	1.14951
AT3G61990	1.222	7.85119	8.20235	10.9084	10.0406	8.61576	30.4591	28.4566	26.178	0.00257594	0.000909421	0.014742	UP	1.63641
AT3G62040	0.867	4.94159	12.7928	7.41404	15.3498	16.6266	24.4465	30.788	23.6956	0.0159551	0.00462734	0.0352921	UP	1.20342
AT3G62280	1.195	0.431371	0.456636	0.403023	0.565546	0.714023	2.11049	2.45376	2.26492	0	0.000313347	0.00903839	UP	2.14657
AT3G62370	1.164	17.0642	19.27	19.6702	21.6951	21.2072	51.2265	47.7757	45.5272	0	0.000596864	0.0119815	UP	1.28419
AT3G62380	1.247	0.0439768	0.00767709	0.0521915	0.00763327	0.00594999	0.0987844	0.127518	0.108266	0	0.000611869	0.0121664	UP	2.24748
AT3G62720	1.797	36.5289	46.066	41.8312	28.5349	18.5512	8.55431	11.3656	18.557	0	0.00992644	0.0552723	DOWN	-1.41928
AT3G62730	1.138	0.125292	0.0757117	0.171572	0.259297	0.254276	0.450076	0.542162	0.468894	0	0.000515631	0.0113771	UP	1.45843
AT3G62860	1.286	21.7736	19.0945	19.8892	22.8493	17.8106	45.0358	42.541	42.308	0	4.11946e-06	0.00170902	UP	1.09389
AT3G62950	0.686	42.1286	31.7483	30.1506	50.6045	59.5409	2.95816	7.33418	2.87709	0	0.00167895	0.020302	DOWN	-3.28655
AT3G63095	0.753	0.0436965	0.0127136	0.0172863	0.0632051	0.00985343	0.318572	0.346328	0.315897	0	1.71484e-06	0.00122607	UP	3.47751
AT3G63110	1.465	4.40959	2.67269	2.46115	2.60546	3.65157	10.0149	9.64296	12.7394	0	0.0083445	0.0498061	UP	1.77287
AT3G63380	3.75	0.628822	0.538659	0.794878	0.337596	0.516407	1.31915	1.30774	1.12635	0	0.000454307	0.0108581	UP	1.15127
AT3G63470	1.794	0.735688	1.098	1.39714	0.774984	0.986341	2.51754	2.67969	2.27653	0.0949924	0.000195561	0.00717425	UP	1.31914
AT4G00020	3.959	1.62066	2.58013	1.50912	2.04607	2.95923	5.02093	5.50754	5.58776	0.000316831	6.82879e-05	0.00453507	UP	1.32582
AT4G00050	1.489	15.1369	14.704	12.02	9.03285	5.92474	32.0337	24.2079	29.9945	0	0.00346197	0.0300145	UP	1.3389
AT4G00080	0.826	1.92534	1.07787	1.71768	1.87839	2.09295	4.45045	3.96576	3.89939	0	0.000140594	0.00623289	UP	1.23965
AT4G00700	3.375	0.815681	1.09774	0.721214	1.53709	1.5279	4.21275	3.50729	3.21351	0	0.00349892	0.0301636	UP	1.67679
AT4G00910	1.494	0.124801	0.173012	0.217814	0.375905	0.571123	1.22811	0.864261	0.976819	0	0.00472301	0.0358024	UP	1.80623
AT4G01240	1.98	0.0166179	0.101535	0.138054	0.216334	0.176123	0.645063	0.658549	0.801993	0	0.000833888	0.014124	UP	2.43566
AT4G01250	1.219	31.176	23.0184	31.4683	26.8069	19.0573	2.90928	4.64915	4.44593	0	0.000505639	0.0113051	DOWN	-2.71676
AT4G01270	1.614	2.27647	1.38202	2.60492	0.666426	1.57679	7.68445	6.97146	7.34109	0	9.28649e-06	0.00221321	UP	2.10761
AT4G01290	3.786	41.2206	36.8798	40.2839	35.7039	37.3275	94.872	89.7559	82.5691	0	0.00269969	0.0262882	UP	1.21816
AT4G01330	1.986	57.7385	69.5151	52.8593	74.5152	68.8128	24.3045	34.4325	34.8412	0.000496032	0.0008425	0.0141841	DOWN	-1.05229
AT4G01450	1.455	15.958	12.5473	15.5751	15.315	10.8974	38.0759	33.2195	30.5628	0	0.00456329	0.0350503	UP	1.27208
AT4G01533	1.068	0.0513475	0.0806741	0.255944	0.133689	0.0903139	0.746681	0.792099	0.680215	0	2.22645e-05	0.002616	UP	2.59534
AT4G01670	1.154	12.7305	11.1554	8.46332	12.5201	17.6785	4.51695	5.7968	4.17306	0.0186667	0.00513705	0.0375681	DOWN	-1.37326
AT4G01740	1.959	1.20372	1.57845	1.54817	1.99703	1.85964	3.9218	3.89949	3.18001	0	0.00385352	0.0318872	UP	1.16323
AT4G01770	1.405	0.21077	0.211226	0.342785	0.115173	0.248201	1.18593	1.31739	1.28579	0	6.53578e-06	0.0020336	UP	2.48486
AT4G01870	2.071	128.431	97.7996	143.71	78.8566	48.5913	20.8025	26.1028	16.5675	0.000116193	0.00936638	0.053329	DOWN	-2.2332
AT4G01920	2.311	0.422387	0.584093	0.343579	0.572522	0.857223	1.13059	1.29084	1.03764	0	0.00220856	0.0235011	UP	1.05237
AT4G01925	0.881	0.610015	0.228195	0.842161	0.421372	0.513732	1.40559	1.33566	1.17487	0	0.00069958	0.0129882	UP	1.31932
AT4G02075	0.855	10.1212	14.4776	9.66727	8.0714	8.98166	4.2995	5.66132	4.54913	0	0.00589729	0.0405427	DOWN	-1.08549
AT4G02100	2.085	4.77114	5.56034	4.63851	5.00816	5.08521	10.0593	10.961	12.3244	0	0.00843831	0.0501789	UP	1.14885
AT4G02110	4.095	1.19186	1.46113	0.848699	1.11342	1.68323	2.71526	2.7819	2.72072	0	0.000424414	0.0105645	UP	1.12076
AT4G02180	2.97	0.0627788	0.12571	0.17969	0.118583	0.202354	0.307797	0.400483	0.31387	0	0.00437055	0.0342429	UP	1.30575
AT4G02380	0.698	806.607	480.518	839.195	687.132	477.27	206.251	290.866	290.416	0	0.00499728	0.0369399	DOWN	-1.32602
AT4G02410	2.265	15.1128	15.3807	14.1544	12.1074	10.453	4.53121	2.44034	2.29057	0	0.000130548	0.00605932	DOWN	-2.12226
AT4G02465	0.426	0.12873	0.0674178	0.0305553	0.0223443	0.0522509	0.593549	0.463045	0.528198	0.0004083	0.00148462	0.019078	UP	3.13199
AT4G02690	1.301	0.109594	0.125093	0.0700353	0.0951137	0.0627333	0.0448504	0.0244451	0.0444738	0	0.00731176	0.0460638	DOWN	-1.28659
AT4G02700	2.306	1.99909	1.16475	2.10147	1.44007	0.741435	5.57397	6.37977	4.70865	0.0842807	0.00422402	0.0335565	UP	1.89887
AT4G03330	1.252	0.2239	0.350506	0.182653	0.223059	0.207418	0.681087	0.865621	0.678794	0.0343104	0.00567325	0.0396679	UP	1.64313
AT4G03400	2.051	28.7538	56.7538	24.7067	15.8026	11.985	87.4387	61.2151	87.9644	0	0.0078346	0.0480514	UP	1.51484
AT4G03510	2.216	41.5797	30.7024	37.3049	50.226	49.4889	12.0568	19.6186	15.7097	0.00279836	0.000995423	0.0155293	DOWN	-1.40612
AT4G03930	1.575	0.118383	0.237054	0.338844	0.28405	0.136615	0.555718	0.585581	0.469414	0	0.00132386	0.0181136	UP	1.26769
AT4G04223	0.565	3.44594	3.38221	2.11886	4.27724	4.27654	8.08301	8.45364	7.59934	0.107195	7.24754e-05	0.00461262	UP	1.20073
AT4G04330	0.706	141.627	164.074	115.93	156.527	112.417	60.1523	62.1453	45.9084	0.203263	0.000583158	0.0118551	DOWN	-1.3006
AT4G04570	2.261	11.1812	20.7006	16.6434	14.798	10.8981	3.91411	5.51662	6.59951	0.00203371	0.00434309	0.0341233	DOWN	-1.47407
AT4G04630	1.124	18.374	24.7595	14.5568	26.7184	34.4247	5.80851	7.26038	5.72541	0	0.00658706	0.0432411	DOWN	-1.92361
AT4G04750	1.502	3.22025	8.08825	3.37113	5.10156	4.67803	10.597	9.95593	9.04416	0	0.0028651	0.0270903	UP	1.01204
AT4G04880	1.327	10.9348	10.6266	9.60302	10.4799	11.0652	24.629	21.3922	23.4242	0	0.0034081	0.0297546	UP	1.13478
AT4G04972	0.408	0.83334	0.915098	1.69088	1.98306	1.32753	3.00333	2.85292	3.16719	0	0.000825691	0.014056	UP	1.15578
AT4G05070	0.525	815.274	580.8	903.695	877.296	784.29	303.41	478.524	391.969	0.000921304	0.00221134	0.0235158	DOWN	-1.01772
AT4G05150	1.668	167.891	164.704	178.166	207.089	150.506	96.5471	91.0659	67.2301	0	0.000713431	0.0131006	DOWN	-1.03171
AT4G05200	2.098	1.08474	1.84095	1.41236	1.88649	2.84515	4.82243	4.57659	4.32222	0.0933133	0.000249459	0.00798363	UP	1.33425
AT4G05370	0.45	0.219357	0.10637	0.0289257	0.105763	0.0824404	0.244928	0.24029	0.300017	0	0.00591029	0.0405739	UP	1.26952
AT4G05475	0.93	0.0589668	0.0102939	0.0139963	0.0102352	0.103715	0.160342	0.170984	0.214298	0	0.00145185	0.0188955	UP	2.20516
AT4G08300	1.444	1.1621	0.510489	1.84792	0.705332	0.200392	3.12046	2.70018	2.29287	0	0.00299074	0.027778	UP	1.61121
AT4G08770	1.235	0.932487	0.813927	1.88661	0.624303	0.967256	14.5994	11.4182	12.3841	0	0.00449536	0.0348069	UP	3.61475
AT4G09820	1.833	0.448765	0.402153	0.859249	0.264841	0.133578	2.60679	2.92526	2.57789	0	1.46965e-05	0.00223466	UP	2.68038
AT4G09970	0.993	6.53742	5.2702	6.5647	5.74682	5.96447	13.178	11.621	13.8816	0.0140296	0.00446187	0.0346354	UP	1.0996
AT4G10270	0.477	3.99303	1.02094	6.12143	0.722405	1.43979	21.5875	19.5044	21.2976	0.0909372	6.71167e-06	0.00197841	UP	2.9671
AT4G10350	1.057	0.134893	0.0452854	0.357124	0.11707	0.343957	0.680847	1.02901	0.845432	0	0.00714998	0.0455053	UP	2.09287
AT4G10465	0.884	0.012407	0.0108296	0.0147246	0.0107678	0.0419663	0.110012	0.12232	0.0945431	0	0.000655471	0.0125722	UP	2.5866
AT4G10640	1.487	0.272905	0.187832	0.446432	0.390478	0.589266	1.91479	1.97866	1.50759	0.00937117	0.00353943	0.0303493	UP	2.25417
AT4G10650	1.134	1.73125	1.89799	1.38889	1.68718	1.55657	3.38938	3.04808	3.80575	0.0122525	0.00767851	0.0473882	UP	1.04709
AT4G10695	0.705	0.273106	0.463648	0.325216	0.559913	0.487236	0.0655037	0.101233	0.0850661	0.039431	0.00264572	0.0259886	DOWN	-2.32931
AT4G10720	1.568	0.0655961	0.0575782	0.0430202	0.0837941	0.0848992	0.163917	0.190312	0.178441	0.0683987	9.93599e-05	0.00534223	UP	1.40653
AT4G11050	1.912	0.189298	0.0751046	0.170196	0.134417	0.376415	0.681568	0.868264	0.897764	0	0.0014412	0.0188518	UP	2.10929
AT4G11110	3.964	16.2276	15.3526	15.325	15.02	13.9726	59.9778	56.3518	53.3728	0	0.00155379	0.019519	UP	1.89784
AT4G11190	0.707	0.946305	2.31547	1.56493	1.25211	1.39577	3.58557	4.56129	3.81007	0	0.0019454	0.0219226	UP	1.41475
AT4G11230	3.13	0.255799	0.137636	0.15387	0.240248	0.343721	0.669051	0.550712	0.610029	0	0.000372525	0.0098725	UP	1.4307
AT4G11290	1.206	1.71884	1.5003	3.61571	1.49174	2.98385	11.4131	10.0472	9.09965	0	0.000834821	0.0141042	UP	2.17096
AT4G11300	1.391	15.5568	14.8865	12.9978	15.6638	13.5111	5.49526	6.73558	5.95751	0	1.30222e-05	0.00216633	DOWN	-1.26031
AT4G11330	1.523	17.622	28.632	19.4949	25.4561	25.5035	10.8681	11.7398	8.15963	0	0.00164004	0.0200772	DOWN	-1.18647
AT3G27940	0.74	2.29731	2.08285	1.95248	3.51163	3.49926	0.411782	0.558703	0.529952	0	0.00305614	0.0280521	DOWN	-2.41572
AT4G11530	2.01	1.70793	1.89085	1.78087	2.32521	2.49905	8.36902	8.14222	8.31158	0.000619067	1.52124e-07	0.000511199	UP	2.01951
AT4G11700	0.552	0.417254	0.502947	0.353711	0.189684	0.309151	0.857403	0.679849	0.75703	0	0.00197651	0.0220953	UP	1.10902
AT4G11720	2.248	0.0439103	0.0383274	0.121596	0.0635144	0.0297049	0.204769	0.268798	0.237367	0	0.000893468	0.0146245	UP	1.99596
AT4G11780	1.422	0.100268	0.356812	0.375302	0.274449	0.328718	0.670223	0.881183	0.86352	0	0.00310876	0.0283261	UP	1.48734
AT4G12000	1.388	2.78937	4.13143	2.6352	3.29862	3.43719	2.13466	1.40685	1.08847	0	0.0094895	0.0537296	DOWN	-1.0781
AT4G12050	1.505	1.18788	0.846015	1.11571	1.05623	1.39519	2.8906	2.54847	3.07136	0	0.00138094	0.0184148	UP	1.34051
AT4G12470	0.799	111.339	33.0094	120.244	29.1756	20.5131	332.486	411.147	345.931	0	0.000277586	0.00845693	UP	2.53059
AT4G12480	0.833	61.6858	13.2739	46.2689	7.37042	10.6262	210.651	238.703	280.735	0	0.00201379	0.0223191	UP	3.12762
AT4G12520	0.683	8.66228	6.92803	6.41641	8.09559	13.7481	18.3021	22.5499	23.0167	0.282619	0.00171979	0.0205082	UP	1.27948
AT4G12690	1.51	7.75011	8.08344	6.93929	8.64247	7.98471	3.13864	3.78688	4.19371	0	0.000175112	0.00682653	DOWN	-1.08817
AT4G12720	1.813	61.6993	64.2041	75.766	56.4349	36.9508	14.1719	15.4051	15.7479	0	0.00223579	0.0236709	DOWN	-1.96564
AT4G12870	0.795	4.95277	1.62566	4.50258	1.54454	1.40926	8.31014	7.1607	6.07312	0	0.00538299	0.0385282	UP	1.35524
AT4G12940	0.456	0.21647	0.188947	0.142725	0.271366	0.406778	0.0995255	0.0139487	0.0140985	0	0.00938058	0.0533737	DOWN	-2.52794
AT4G13110	1.221	12.3512	9.30675	13.4643	10.501	7.38317	5.67627	4.58944	4.47024	0	0.00442125	0.0344634	DOWN	-1.10986
AT4G13235	0.276	4.49045	8.42869	5.70653	5.06974	8.0917	20.93	19.5197	18.7976	0	1.27523e-05	0.00214265	UP	1.63527
AT4G13560	0.605	4.369	6.85166	5.3142	8.07122	6.414	1.76819	2.78606	1.34954	0	0.0014893	0.0191089	DOWN	-1.65652
AT4G13572	0.555	13.1416	14.8171	11.7501	17.1336	13.3821	6.20301	7.78173	4.80722	0	0.00109213	0.0162749	DOWN	-1.16489
AT4G13580	0.955	2.94105	2.00281	3.61461	3.05352	3.22874	6.19236	7.66701	6.18966	0.0649003	0.00561417	0.0394766	UP	1.17094
AT4G13620	1.405	0.476183	0.170344	0.453958	0.440366	1.09314	1.14901	1.42605	1.13936	0	0.00752785	0.0468542	UP	1.23285
AT4G13830	1.084	146.376	125.628	138.823	135.835	116.339	56.9688	67.8603	51.3781	0	7.36416e-05	0.0046516	DOWN	-1.17477
AT4G13880	2.525	3.17308	2.40818	3.35058	3.03935	1.83067	6.52982	5.54006	4.99416	0.0239934	0.00711695	0.0453896	UP	1.04306
AT4G14250	2.703	0.142018	0.0743766	0.12039	0.144383	0.167443	0.0359788	0.0258849	0.0594611	0	0.00308175	0.0281947	DOWN	-1.68151
AT4G14270	0.78	913.325	493.579	826.101	846.492	704.913	315.516	361.079	256.935	0	0.00230662	0.024057	DOWN	-1.28233
AT4G14480	1.464	15.2006	11.2147	13.5945	11.8919	9.99927	5.17696	5.86098	6.38941	0	0.00106956	0.0160669	DOWN	-1.09164
AT4G14640	0.624	0.474569	0.352863	1.06385	0.259323	0.130795	1.9845	2.1304	1.96783	0	0.000323966	0.00921029	UP	2.15176
AT4G14695	0.549	0.0199778	0.122064	0.403063	0.156044	0.202722	0.767613	0.799422	0.808008	0	0.000483764	0.0110513	UP	2.13073
AT4G14780	1.363	0.410388	0.231783	0.353348	0.202525	0.52803	1.2415	1.21799	1.27824	0	4.72979e-05	0.00385776	UP	1.85163
AT4G14805	0.66	0.0166179	0.014505	0.0197221	0.0721113	0.0112419	0.0884097	0.0674611	0.0876672	0	0.00676172	0.0438904	UP	1.59675
AT4G14940	2.215	0.788277	0.67889	1.07541	0.692028	0.613383	2.0952	1.88516	1.64758	0.0022603	0.00282111	0.0268557	UP	1.28547
AT4G14980	1.764	0.217616	0.287634	0.420603	0.0269804	0.290224	1.38562	1.51083	1.33754	0	9.02966e-06	0.00219879	UP	2.50509
AT4G15165	0.908	1.53405	1.10705	0.989144	0.974932	1.28291	3.87717	3.92985	3.43395	0	0.000232611	0.00774695	UP	1.66986
AT4G15260	1.651	34.7768	23.2926	37.394	30.5163	21.1534	14.3215	13.7576	13.3135	0	0.00754222	0.0468915	DOWN	-1.09271
AT4G15280	1.437	0.297665	0.273143	0.353268	0.139104	0.160062	0.717367	0.641816	0.657657	0	0.0001246	0.00596447	UP	1.45835
AT4G15310	1.428	0.00768055	0.00670401	0.00911524	0.00666575	0.00519582	0.0317813	0.0400879	0.0405185	0	0.00639723	0.0425267	UP	2.4052
AT4G15330	1.701	0.625443	0.669739	0.726968	0.934522	1.05122	1.71899	1.61166	1.74991	0	0.000103634	0.00544142	UP	1.07911
AT4G15340	2.491	0.567985	0.634123	0.465064	0.821565	0.944209	1.64752	1.54483	1.3756	0	0.000515416	0.0113798	UP	1.14907
AT4G15350	1.561	0.00702615	0.0306641	0.0083386	0.0792716	0.0522844	0.211821	0.215959	0.275937	0	0.00166983	0.0202574	UP	2.72345
AT4G15390	1.482	4.285	12.1766	7.38659	6.22376	16.196	34.7924	27.0434	25.1474	0	0.0051828	0.0376813	UP	1.64769
AT4G15393	1.629	0.23565	0.617065	0.375554	0.695349	1.04303	7.06445	6.77451	5.02396	0	0.00962344	0.0541776	UP	3.40561
AT4G15490	1.848	25.5026	29.15	26.7727	18.3626	13.1409	8.18491	5.53112	6.65506	0	0.00482472	0.036222	DOWN	-1.73385
AT4G15530	3.256	50.5376	46.9699	63.1839	74.8194	42.8429	25.3859	31.598	21.828	0	0.00506811	0.0372749	DOWN	-1.08347
AT4G15563	0.993	1.55737	1.53289	1.61232	1.40911	2.03984	3.50612	3.49097	3.58026	0	2.89845e-05	0.00292491	UP	1.1128
AT4G15660	0.505	19.9158	11.9619	10.8514	15.3995	19.8787	3.813	3.38813	7.88021	0	0.00444031	0.0345559	DOWN	-1.63388
AT4G15760	1.583	100.055	193.372	100.029	112.222	94.1305	19.2863	30.6941	33.6636	0	0.00656995	0.0431963	DOWN	-2.1052
AT4G15890	4.182	0.910052	1.09651	0.837268	0.858093	1.36435	2.3022	2.62364	2.50731	0	6.71125e-05	0.00453773	UP	1.29002
AT4G15910	0.665	91.2556	62.5506	98.3191	77.3948	78.5142	167.505	161.024	173.929	0	2.44546e-05	0.00273014	UP	1.03728
AT4G16000	0.637	41.7191	39.0297	37.2923	48.3406	45.205	5.09917	8.31773	7.07485	0	9.19404e-06	0.00220683	DOWN	-2.63117
AT4G16008	0.683	27.1546	24.8794	19.9155	26.8558	32.3618	10.8309	12.8982	11.2859	0	0.00120274	0.0171404	DOWN	-1.16839
AT4G16146	0.676	136.498	112.968	119.903	117.561	79.1464	52.3178	46.0016	35.9773	0	0.000843755	0.014191	DOWN	-1.33861
AT4G16350	0.93	0.813742	1.16321	0.741804	0.685755	0.917482	2.09838	2.83834	2.48171	0	0.00898602	0.0520901	UP	1.51638
AT4G16540	0.699	0.674702	0.616309	0.428299	0.612791	0.520117	6.91004	5.55985	6.13462	0	0.00439411	0.0343315	UP	3.44246
AT4G16570	2.464	4.35775	3.55503	4.37935	3.95196	4.84505	9.01726	8.3354	9.68775	0	0.00115076	0.0167041	UP	1.09558
AT4G16690	1.152	22.5735	10.0803	21.7734	13.7905	7.00099	40.4705	32.2945	33.4449	0	0.00245811	0.024978	UP	1.23472
AT4G16845	1.9	16.2728	15.5138	16.8188	14.6538	14.9759	38.5556	35.5559	37.413	0	0.000261795	0.00822953	UP	1.24844
AT4G16890	3.906	66.2056	94.4469	75.1657	73.7611	56.2213	44.1521	28.1491	22.6239	0.00455148	0.00516931	0.0376402	DOWN	-1.20923
AT4G16950	4.818	90.3475	112.138	89.3188	95.1906	83.305	43.7536	36.8185	30.8753	0.298695	9.26699e-05	0.00519013	DOWN	-1.34025
AT4G11370	0.713	2.29201	3.58496	2.93922	3.4043	2.96577	1.10026	1.75742	1.01889	0	0.00266863	0.0261448	DOWN	-1.23295
AT4G17215	0.652	2.57374	1.68855	2.65522	2.23368	2.85633	4.48467	5.707	5.19639	0	0.00474573	0.0359018	UP	1.09484
AT4G17220	1.77	1.18353	1.0006	1.49286	1.42511	1.30368	2.48713	3.09406	2.69143	0	0.00504842	0.0372033	UP	1.10593
AT4G17230	2.026	50.0157	55.0726	65.6289	51.6199	39.9437	13.8468	13.6851	11.541	0	0.000538259	0.0114769	DOWN	-2.00991
AT4G17250	2.537	28.2604	18.7806	29.6195	21.7726	14.0584	6.62138	5.61349	5.5116	0	0.00441594	0.034438	DOWN	-1.92725
AT4G17260	1.267	7.0897	7.92614	6.89354	7.73065	10.2423	14.6298	16.4111	17.5616	0	0.00143422	0.0188191	UP	1.02225
AT4G17280	1.583	2.92345	1.27928	2.35853	2.35838	3.29228	6.04571	6.59964	5.81839	0.0447915	0.000105524	0.00545543	UP	1.33337
AT4G17340	0.978	74.4982	72.7397	49.2313	60.2558	90.1357	158.962	131.732	145.598	0	0.000882961	0.0145732	UP	1.0679
AT4G17380	2.504	0.223386	0.187347	0.150769	0.193871	0.299331	0.577447	0.729204	0.618849	0.00023587	0.00267545	0.0261735	UP	1.60536
AT4G17483	0.934	1.0686	1.26073	0.933736	1.15162	1.07243	3.76924	3.94304	3.3246	0	0.00282846	0.0268952	UP	1.74518
AT4G17670	0.831	3.1544	2.43077	4.52682	2.02745	1.84821	9.40129	10.0193	9.12119	0	2.72132e-05	0.0028939	UP	1.76589
AT4G17840	1.724	58.4803	69.9545	53.1878	52.2637	40.3779	31.837	21.3299	19.6054	0.0888059	0.00257947	0.0256679	DOWN	-1.17714
AT4G17900	1.241	51.7635	51.2455	70.7048	58.7612	44.3325	25.9701	28.8304	22.8924	0	0.00158383	0.0197268	DOWN	-1.09606
AT4G18160	1.501	11.2455	9.52231	10.2762	13.4631	12.5803	6.24149	5.49615	4.92128	0	0.000480965	0.0110248	DOWN	-1.03991
AT4G18170	1.242	8.85727	5.12582	6.34059	8.60667	9.24169	2.13503	3.42613	3.50434	0	0.00275122	0.026521	DOWN	-1.33709
AT4G18197	1.521	8.67475	17.0255	14.5227	14.5628	11.6831	6.1168	6.23516	6.42048	0	0.00785294	0.04812	DOWN	-1.0871
AT4G18205	1.432	14.7591	30.9729	28.9509	25.8906	20.5439	9.89258	8.79915	9.99806	0	0.0072212	0.0457938	DOWN	-1.34083
AT4G18250	2.562	0.107024	0.130783	0.238789	0.100314	0.0955691	0.432731	0.355023	0.474265	0	0.00224671	0.0237342	UP	1.64514
AT4G18290	2.216	5.13251	4.09977	4.59926	2.96815	2.50781	8.9439	9.46917	8.21893	0	0.000178148	0.00688101	UP	1.20097
AT4G18330	1.659	0.0330555	0.00577054	0.0235381	0.0745889	0.0402512	0.0820681	0.0958502	0.0813789	0	0.00828108	0.0496126	UP	1.28616
AT4G18360	1.704	1.71855	2.21917	2.25345	2.13947	3.2265	5.26965	5.90895	4.90093	0	0.00070602	0.0130072	UP	1.21341
AT4G18375	2.084	1.07889	1.71346	1.11802	1.53925	1.87627	2.91503	3.18336	2.75482	0	0.000342006	0.00946687	UP	1.01016
AT4G18430	0.897	1.16159	0.864481	1.2915	0.604867	1.3979	2.43578	3.29731	2.81669	0	0.00584181	0.0403346	UP	1.42134
AT4G18830	1.408	8.18692	8.19308	7.55293	6.41565	5.38029	3.29234	3.23904	3.6939	0	0.00174531	0.0205788	DOWN	-1.06799
AT4G18880	1.904	22.3677	25.6378	24.577	20.7721	17.532	6.11222	6.09002	5.75025	0	0.000333449	0.00934547	DOWN	-1.88986
AT4G18900	1.386	0.0237399	0.00690716	0.0281744	0.00686774	0.0910056	0.182433	0.123908	0.143793	0	0.00379593	0.0316208	UP	2.25936
AT4G18960	1.622	0.114953	0.0531196	0.104325	0.0997643	0.00457437	0.171877	0.176466	0.217997	0	0.00418385	0.0333557	UP	1.32508
AT4G19030	1.172	1.67512	3.25918	2.80989	3.25682	5.94457	14.6982	16.3629	11.7224	0	0.00511884	0.0374676	UP	2.07311
AT4G19160	2.061	218.468	248.911	189.489	343.204	292.224	52.04	53.394	46.924	0	0.00152511	0.0193835	DOWN	-2.34743
AT4G19390	1.03	29.677	32.1125	39.1381	49.5988	39.6842	13.4011	16.6302	12.5146	0	0.00140262	0.0185639	DOWN	-1.42354
AT4G19420	1.853	90.1279	92.9486	94.3051	76.7197	55.1568	28.1203	32.2699	37.3072	0	0.00155649	0.0195311	DOWN	-1.32965
AT4G19570	1.892	0.0753603	0.0657787	0.00687979	0.125776	0.0980396	0.18847	0.164731	0.152908	0	0.00636163	0.0423907	UP	1.18175
AT4G19680	1.358	0.476511	0.401826	0.50801	0.567757	0.322355	1.58981	1.77516	1.69955	0	2.6257e-05	0.00281898	UP	1.8906
AT4G19720	1.147	0.162557	0.175275	0.238315	0.157677	0.35578	0.785693	0.682089	0.566105	0	0.00552902	0.0391729	UP	1.6374
AT4G19960	2.804	10.0721	16.4597	13.0955	10.0584	8.81942	6.42095	4.54816	3.95503	0	0.00583573	0.0403174	DOWN	-1.23395
AT4G19980	0.384	0.314183	0.47368	0.915227	0.223094	0.444405	4.20406	3.66067	4.00134	0	4.15257e-05	0.0036151	UP	3.06049
AT4G20210	1.803	0.0912465	0.0902643	0.0360969	0.058073	0.144031	0.449485	0.462141	0.410054	0	8.07343e-06	0.0021031	UP	2.39187
AT4G20230	1.958	0.487334	1.43258	0.485296	0.94798	1.29976	4.22181	3.1933	3.94995	0	0.00202437	0.0224141	UP	2.02535
AT4G20390	0.824	3.0481	3.28793	3.26994	4.44745	7.08647	9.82735	12.4356	9.26109	0	0.00570512	0.0398079	UP	1.31345
AT4G20450	2.697	0.0447334	0.0461451	0.0723947	0.0458817	0.079781	0.262027	0.313668	0.336106	0	0.00392246	0.0322117	UP	2.39494
AT4G20690	0.417	1.07837	0.895347	1.59195	0.474973	0.373651	2.25441	2.47976	2.82133	0.12	0.00101687	0.0156819	UP	1.51231
AT4G20860	1.846	52.2009	80.9877	59.6606	49.6219	45.0037	10.3961	9.67659	10.2009	0.0014186	0.0016938	0.0203863	DOWN	-2.51034
AT4G21200	1.174	1.37331	0.888836	1.91811	1.11078	0.827915	3.16437	3.4512	3.01733	0	0.000157985	0.00651402	UP	1.39165
AT4G21230	2.034	1.38946	1.20181	1.62486	1.72684	1.89223	3.47756	3.35278	3.04975	0.00921049	0.000152482	0.00641301	UP	1.07152
AT4G21270	2.849	4.26163	3.49801	4.07995	3.68519	4.11739	9.06398	8.8745	8.32895	0	8.56667e-05	0.00500651	UP	1.15629
AT4G21340	1.133	0.609861	0.346431	0.930575	0.579691	0.739999	1.49352	1.8919	1.44693	0	0.00525142	0.0379503	UP	1.32867
AT4G21600	1.148	2.64642	4.04448	2.86863	4.28673	4.7116	10.1938	9.25836	9.12258	0	3.90311e-05	0.00347905	UP	1.35968
AT4G21830	0.817	1.03369	1.18243	2.43762	1.92238	2.75117	8.31552	8.8812	8.9436	0.0526316	2.81536e-06	0.00157679	UP	2.22371
AT4G21903	1.765	0.155352	0.50443	0.287618	0.436835	0.72725	1.27464	1.23609	1.05267	0	0.00066672	0.012665	UP	1.49196
AT4G22070	1.778	1.62235	1.2007	1.32508	1.408	1.62331	3.4386	3.92441	3.7713	0	0.000440665	0.0107774	UP	1.37003
AT4G22110	1.454	0.037716	0.0460889	0.0447612	0.0458259	0.0663379	0.254163	0.301845	0.349302	0	0.00980246	0.0548363	UP	2.64796
AT4G22230	0.31	0.672222	3.24258	1.72154	2.54855	3.08753	6.79709	6.99668	7.94284	0	0.000155578	0.00647036	UP	1.68429
AT4G22265	0.036	0.304662	0.265926	0.361571	1.32204	2.26711	2.34122	3.00362	3.39305	0	0.00704996	0.0450736	UP	1.68751
AT4G22460	0.402	0.51838	0.690613	0.550452	0.497245	1.31043	2.95139	2.86386	2.35088	0	0.000646602	0.0124804	UP	1.93186
AT4G22640	0.508	0.0647706	0.0188451	0.0768694	0.0936879	0.0730279	0.165913	0.162772	0.215141	0	0.00475056	0.0359302	UP	1.46993
AT4G22666	0.733	1.90029	1.44971	2.96557	2.19462	4.1805	8.14624	9.34568	6.76222	0	0.00440283	0.0343677	UP	1.67142
AT4G22690	2.335	105.588	156.424	186.895	143.64	94.7859	47.6889	36.4814	31.9433	0.430011	0.00318126	0.0287142	DOWN	-1.82851
AT4G22810	1.563	0.792939	1.41487	1.04099	1.29717	2.35928	2.94096	2.90155	2.62011	0	0.00391302	0.0321577	UP	1.03037
AT4G22960	1.708	0.199065	0.229805	0.16004	0.239639	0.291051	0.732606	0.793215	0.764094	0	1.458e-06	0.00122486	UP	1.76928
AT4G23130	2.139	0.158954	0.496793	0.310353	0.191353	0.260155	0.730479	0.823698	0.928723	0	0.000854946	0.0143218	UP	1.54553
AT4G23170	1.065	14.4899	13.4206	15.901	12.2536	7.01556	5.39977	4.07916	2.96395	0	0.00318182	0.0287116	DOWN	-1.60491
AT4G23180	2.185	53.6645	108.198	81.2984	73.8624	54.6676	11.9846	10.4652	9.60073	0	0.00307689	0.0281809	DOWN	-2.79872
AT4G23200	1.947	0.208428	0.221263	0.340958	0.454668	0.118135	0.822493	0.780785	1.05333	0	0.00418702	0.033373	UP	1.7206
AT4G23450	1.424	2.6559	3.28278	2.10823	3.2864	3.11756	1.49163	1.39285	1.44317	0.00834712	0.00286745	0.0270972	DOWN	-1.00254
AT4G23510	1.925	4.21051	3.81441	5.82195	3.77286	3.758	11.3265	12.8435	9.57493	0	0.00877185	0.0513178	UP	1.39553
AT4G23515	0.996	0.231249	0.355636	1.0063	0.487403	0.409719	1.56877	1.69233	1.25868	0	0.00219083	0.0234162	UP	1.59689
AT4G23690	0.877	11.8182	7.63028	9.81066	8.0643	9.41625	20.8252	19.3139	21.0315	0	1.99461e-05	0.00244623	UP	1.12515
AT4G23770	1.066	3.13807	3.34977	3.33351	2.0091	2.38737	1.70903	1.19933	1.24839	0	0.00393817	0.0322304	DOWN	-1.03721
AT4G23870	0.82	70.9297	98.0332	61.9874	145.462	142.412	8.89488	21.8355	16.3467	0	0.00626844	0.0420532	DOWN	-2.72518
AT4G23880	0.774	24.2171	25.096	25.31	36.1194	33.8677	6.25721	11.9241	8.92907	0	0.000578629	0.0118418	DOWN	-1.67828
AT4G24230	1.786	105.233	78.69	93.9125	142.827	122.984	17.7504	19.7681	19.2213	0.0113103	0.00127872	0.0178004	DOWN	-2.52327
AT4G24972	0.935	44.798	42.8906	42.53	45.4759	33.8288	13.3065	11.6124	9.08301	0	1.872e-05	0.00241949	DOWN	-1.88646
AT4G25070	2.606	0.340903	0.268171	0.414572	0.244725	0.634911	0.987683	1.26187	0.94485	0.00505051	0.00491653	0.0366493	UP	1.48402
AT4G25090	2.83	0.228658	0.294304	0.225375	0.501161	0.432594	1.35395	1.50362	1.51068	0	1.03063e-05	0.00230889	UP	2.11377
AT4G25160	2.832	0.305953	0.158879	0.335526	0.252084	0.248893	0.858498	0.671548	0.678761	0	0.00600662	0.0409342	UP	1.50024
AT4G25240	2.236	1.61378	1.96519	1.90358	1.73261	2.08055	3.76651	3.43348	4.08565	0	0.00349992	0.0301645	UP	1.01682
AT4G25470	0.944	4.72871	4.35059	2.79911	6.92727	7.42749	1.13322	1.27347	0.796806	0	0.00747636	0.0466374	DOWN	-2.29671
AT4G25835	1.753	13.0826	14.7832	12.6304	12.7115	14.3017	4.87825	6.27354	7.69051	0	0.00343702	0.0299294	DOWN	-1.10415
AT4G26080	2.031	176.592	94.7576	159.192	168.014	168.203	85.8609	76.1113	46.3818	0.000118089	0.00470276	0.0357053	DOWN	-1.14277
AT4G26220	1.048	2.79428	1.92745	2.76974	3.22437	3.17883	8.13515	8.69729	7.527	0	0.000230933	0.00772936	UP	1.54691
AT4G26330	2.241	0.00489417	0.0555347	0.0290419	0.0722078	0.102637	0.147547	0.1334	0.129095	0	0.0058919	0.0405222	UP	1.37048
AT4G26400	1.47	40.193	37.7267	46.2132	43.7148	36.8912	17.7256	20.9765	16.5359	0.00017938	5.33311e-05	0.00404546	DOWN	-1.15309
AT4G26466	0.498	0.154166	0.0192236	0.130688	0.133797	0.0446966	0.325471	0.268219	0.348556	0	0.00111631	0.0164672	UP	1.70233
AT4G26700	2.721	57.959	50.808	51.0282	47.1387	38.4725	27.9517	21.7327	21.7724	0.000216828	0.000565285	0.0117258	DOWN	-1.04306
AT4G26770	1.741	0.145113	0.0274938	0.12766	0.0929453	0.0810575	0.368934	0.464324	0.351645	0.00465529	0.00330822	0.0293478	UP	2.05796
AT4G27250	1.246	0.220061	0.145982	0.198487	0.313215	0.12505	0.671232	0.495168	0.583041	0	0.00413006	0.0330917	UP	1.53983
AT4G27260	2.246	64.005	64.8097	63.9295	98.4036	79.5447	21.9702	32.7631	18.7973	0	0.000828464	0.0140818	DOWN	-1.59684
AT4G27410	1.827	72.5365	45.362	62.9454	95.2234	82.3064	12.9277	11.4992	7.25938	0	0.0015815	0.0197125	DOWN	-2.76257
AT4G27595	3.828	2.30645	2.99854	2.49246	2.10117	2.88994	5.71953	5.31879	4.72765	0	0.00239478	0.0245798	UP	1.03893
AT4G27650	1.509	17.8581	17.8969	20.5039	19.0689	17.7943	42.1957	40.5031	39.072	0	0.000102888	0.0054192	UP	1.12394
AT4G17140	13.366	13.4205	13.3974	13.6369	13.2981	11.6368	6.23939	7.22339	5.43953	0	0.000429215	0.0106132	DOWN	-1.05354
AT4G27990	0.92	64.7936	55.3484	70.7563	59.0055	51.1713	26.152	26.8321	25.7786	0	0.000565497	0.011723	DOWN	-1.19757
AT4G28150	1.291	8.691	6.36986	7.12836	7.99983	6.91388	3.44006	3.37492	2.80363	0	0.000150856	0.0064088	DOWN	-1.21067
AT4G28270	0.88	64.1992	36.8029	48.7086	57.3609	55.3859	22.9792	21.4165	21.0767	0	0.00249551	0.0251905	DOWN	-1.26616
AT4G28350	1.95	4.39275	4.76703	5.84076	4.85697	2.89556	2.07801	2.00604	1.46711	0	0.00310177	0.0282932	DOWN	-1.29823
AT4G28400	1.276	22.3856	31.1283	24.6764	22.2526	24.579	10.6809	12.3456	11.1398	0.0504549	0.000631413	0.0123792	DOWN	-1.13457
AT4G28410	1.659	0.403278	0.259674	0.368763	0.395895	1.37301	2.37216	2.27357	2.29023	0	0.000884796	0.0145606	UP	2.04531
AT4G28703	0.55	25.0665	28.633	26.7668	40.6189	34.1978	4.37333	6.53409	3.9158	0	0.000460776	0.0109273	DOWN	-2.652
AT4G28890	1.403	2.27487	1.54893	1.60504	2.34066	2.36392	4.24677	4.42024	3.49627	0	0.00490757	0.0366069	UP	1.00038
AT4G28940	1.295	0.211734	0.938852	0.452313	1.63913	1.34642	2.43815	3.08944	2.57654	0	0.00172044	0.0205012	UP	1.55762
AT4G29180	2.985	0.4005	0.227707	0.536361	0.398605	0.340533	1.11423	1.29769	0.941187	0	0.00781013	0.0479363	UP	1.55365
AT4G29230	1.497	1.82431	2.11675	2.02596	2.29542	2.55251	5.44396	5.20491	5.1148	0	1.30451e-06	0.00132839	UP	1.28054
AT4G29690	1.575	0.257657	0.711162	1.13223	0.803801	1.0411	2.70449	2.0879	2.53484	0	0.00132679	0.0181315	UP	1.62986
AT4G29800	1.696	0.873029	0.491085	0.437467	0.679105	1.16807	1.80051	1.93894	1.72474	0	0.000497049	0.01118	UP	1.31957
AT4G29950	3.109	44.8979	32.6306	41.7893	35.6224	30.6737	15.1418	15.5598	13.9038	0.000322166	0.000960441	0.0151952	DOWN	-1.32005
AT4G30090	1.498	0.197684	0.543213	0.599561	0.540113	0.936122	1.29408	1.32053	1.25746	0	0.00307498	0.0281711	UP	1.19607
AT4G30170	1.204	18.1917	16.8487	32.4873	21.7333	25.0875	61.4036	56.078	49.6961	0	0.000966268	0.0152443	UP	1.28491
AT4G30210	2.619	63.3068	111.111	96.742	86.8167	77.0832	35.838	38.0253	34.1919	0	0.00308703	0.0282199	DOWN	-1.27248
AT4G30240	1.497	18.2944	20.6623	20.3378	18.2426	16.7871	9.6103	9.37734	8.96271	0	0.000100392	0.00536339	DOWN	-1.0178
AT4G30320	0.486	1.15094	0.807627	1.20524	0.607159	0.717537	3.10829	3.54676	2.97636	0	0.00042793	0.010597	UP	1.83848
AT4G30380	0.372	0.0294834	0.0257348	0.0349908	0.0255879	0.0199453	0.121999	0.119689	0.155539	0	0.0093697	0.0533298	UP	2.28606
AT4G30420	1.122	0.900423	0.169104	0.751536	0.481384	0.663098	3.06967	3.33661	2.38486	0.153857	0.0060401	0.0410874	UP	2.30472
AT4G30520	2.407	4.99863	5.57218	5.14281	5.86465	5.63794	11.9297	10.9428	10.4567	0	0.00239779	0.0245957	UP	1.02929
AT4G30640	0.906	0.447913	0.327564	0.0718353	0.346707	0.237494	0.765697	0.624829	0.645731	0	0.0022206	0.0235919	UP	1.24534
AT4G30850	1.545	4.05093	5.03857	5.17005	4.4296	6.32207	12.0211	12.1109	11.7037	0.144712	1.89179e-05	0.00241717	UP	1.25579
AT4G30980	1.23	1.45346	1.113	1.66146	1.18403	1.26073	3.08356	3.18031	2.66043	0	0.00153722	0.0194271	UP	1.15644
AT4G31320	0.57	1.25072	0.587836	1.48434	0.885071	1.31471	7.15446	8.78212	7.27484	0	0.00335774	0.0295608	UP	2.80836
AT4G31470	0.558	0.727257	0.360287	0.956414	0.289996	1.47595	3.82264	2.97513	3.07621	0	0.00112719	0.0165191	UP	2.11084
AT4G31510	0.793	58.7947	53.0336	59.4034	54.6515	47.4651	25.631	22.9159	20.1948	0	2.1757e-05	0.00256535	DOWN	-1.25452
AT4G31550	1.177	40.7869	58.473	41.5933	38.8431	36.6065	17.7646	19.5898	17.528	0	0.00268007	0.0261881	DOWN	-1.24167
AT4G31680	1.39	0.118358	0.117084	0.121738	0.0616318	0.0266893	0.685652	0.764189	0.559641	0	0.00597344	0.0408157	UP	2.91029
AT4G31760	1.065	0.13388	0.18877	0.158888	0.0804396	0.285639	0.322647	0.412096	0.380303	0	0.00335733	0.0295649	UP	1.13259
AT4G32030	1.523	40.9115	36.0744	42.8615	35.556	33.6977	14.18	16.2252	17.0749	0	4.78512e-05	0.00387468	DOWN	-1.2568
AT4G27657	0.473	11.1533	4.75631	7.51273	8.39174	11.5295	3.98872	1.92298	1.20967	0	0.00573093	0.0398886	DOWN	-1.86863
AT4G32480	1.145	120.34	129.771	129.404	143.263	135.621	30.7522	43.2578	49.8874	0	0.000232426	0.00775615	DOWN	-1.67285
AT4G32730	3.552	13.4041	8.1853	13.6652	8.00996	7.66403	31.0571	27.1633	26.2605	0	0.000272527	0.00837111	UP	1.46712
AT4G32785	0.524	0.188379	1.00483	0.173885	1.07176	1.17525	1.67034	1.95431	2.12253	0	0.00389943	0.0321089	UP	1.40618
AT4G33070	2.149	3.82266	1.626	6.14789	0.846007	3.13151	23.3963	24.5042	25.605	0	1.35765e-06	0.00120059	UP	2.97567
AT4G33145	0.422	0.0259901	0.0226856	0.154225	0.112781	0.228567	0.44554	0.497394	0.594143	0	0.00104228	0.0158915	UP	2.23482
AT4G33300	3.228	40.6614	42.3934	47.4708	36.3441	28.3503	17.8292	17.9352	15.2852	0.0639837	0.00168724	0.0203511	DOWN	-1.19816
AT4G33310	0.261	12.8051	11.3526	11.7507	8.85829	6.42129	3.05621	4.14063	2.93717	0.457492	0.00273284	0.0264196	DOWN	-1.59964
AT4G33560	0.515	5.00474	3.36461	6.49564	2.08857	3.73143	25.0145	21.3544	26.0528	0	0.000892647	0.0146253	UP	2.5448
AT4G33880	1.347	0.333839	0.206107	1.14994	0.473461	0.192789	1.54504	1.78022	1.15978	0	0.0089034	0.051763	UP	1.66566
AT4G33920	1.634	40.7501	45.6462	44.6498	30.5309	26.3411	12.0661	12.4604	13.4441	0	0.0028579	0.0270374	DOWN	-1.57018
AT4G33930	1.032	1.85985	1.66049	1.27391	1.18984	0.524838	0.157059	0.178738	0.22702	0.0406947	0.0081463	0.0491822	DOWN	-2.79472
AT4G33940	1.025	41.6991	40.0025	45.323	41.3158	34.8542	15.5538	15.7805	14.106	0	4.47651e-05	0.003742	DOWN	-1.42385
AT4G33980	1.121	64.2317	25.6456	61.878	55.0658	42.274	6.92293	7.85857	7.39241	0	0.00401378	0.0325324	DOWN	-2.7528
AT4G33985	0.71	15.9265	11.7172	19.6715	11.1945	9.83363	3.24169	4.91828	3.57666	0	0.00447212	0.034675	DOWN	-1.80482
AT4G34138	1.752	67.854	82.9088	63.218	65.5062	62.0209	24.4718	22.6869	21.4481	0	0.000173003	0.0068075	DOWN	-1.57853
AT4G34140	2	24.025	20.8938	26.6644	20.013	16.4011	49.5492	40.5076	40.3126	0	0.00595117	0.0407215	UP	1.00857
AT4G34150	1.171	113.565	187.403	144.627	107.583	79.7278	16.8701	15.9531	16.7723	0	0.00390171	0.0321198	DOWN	-2.93675
AT4G34390	3.151	17.8388	22.6679	25.1863	16.4002	11.6958	7.56154	7.55967	6.40853	0	0.00755439	0.0469151	DOWN	-1.38612
AT4G34510	1.623	0.790657	0.642941	0.793986	0.451595	0.745164	1.43409	1.69695	1.67556	0	0.00071761	0.0131486	UP	1.22616
AT4G34930	1.551	0.261644	0.401203	0.209809	0.177977	0.100459	0.790044	1.00474	0.92434	0	0.000660112	0.0126108	UP	1.9771
AT4G35060	0.9	4.5943	6.73324	4.06406	4.41033	5.1855	10.6543	10.5516	10.7363	0	0.000244476	0.00791462	UP	1.09123
AT4G35380	5.222	0.569184	0.595812	0.605711	0.690843	0.924968	1.77169	1.87944	1.49335	0	0.00297206	0.0276581	UP	1.34019
AT4G35470	2.478	34.9705	43.7908	31.1862	42.3271	42.88	13.6601	18.068	19.6941	0	0.000399336	0.0102751	DOWN	-1.18719
AT4G35480	0.874	10.4533	11.6873	8.20609	13.0147	10.0768	4.79948	3.67519	4.96513	0	0.0006398	0.0124205	DOWN	-1.25439
AT4G36270	2.163	2.03333	2.50951	2.58165	2.61841	2.3703	5.68007	5.33139	5.0082	0	0.000639466	0.0124212	UP	1.14023
AT4G36500	0.699	71.942	111.853	88.6951	96.7529	81.9981	19.1348	26.5435	24.4925	0	0.000289122	0.00864381	DOWN	-1.94799
AT4G36550	2.6	9.83449	9.93785	8.40569	7.88417	6.21303	3.53344	3.13872	2.98945	0.000249171	0.00117453	0.0169032	DOWN	-1.39251
AT4G36570	0.4	4.79842	2.70447	3.93751	0.880479	1.50248	9.83852	8.95257	8.34154	0	0.000349913	0.00956753	UP	1.70989
AT4G36670	1.77	55.1799	62.9839	57.0596	89.5671	66.9296	24.7064	30.6639	25.2399	9.21225e-05	0.00209159	0.0227683	DOWN	-1.30397
AT4G36730	1.506	89.9429	74.3771	86.8298	87.4447	83.5657	40.6121	40.8693	41.0659	0.101629	8.52579e-05	0.00500001	DOWN	-1.04749
AT4G36870	2.738	19.1436	19.9893	17.6613	18.5681	17.2863	7.74548	8.58381	6.44537	0	8.54735e-05	0.00500393	DOWN	-1.28737
AT4G36900	1.024	28.2015	28.2619	24.5967	36.8384	36.917	9.80737	14.0567	10.3277	0	0.000580873	0.0118373	DOWN	-1.44186
AT4G36940	2.132	9.4863	12.9351	9.73122	11.396	12.8272	23.1428	22.976	22.6722	0.0644739	6.20753e-05	0.00430098	UP	1.02411
AT4G37010	0.821	6.29214	6.14512	6.49337	7.40858	8.17877	15.5175	15.1462	13.9307	0.00136932	9.89699e-05	0.00534692	UP	1.10648
AT4G37060	1.545	0.00709892	0.0309816	0.00842496	0.00616097	0.00480235	0.0545527	0.0370521	0.0540946	0	0.00523424	0.0378913	UP	2.07911
AT4G37070	1.513	4.47267	5.57442	3.8284	7.48032	8.82216	18.1389	18.1149	19.5757	0	3.24189e-05	0.0031215	UP	1.6245
AT4G37160	1.741	0.308687	0.159464	0.590642	0.202293	1.2913	1.84335	2.77295	2.16759	0	0.00573238	0.0398822	UP	2.14723
AT4G37260	1.31	119.949	124.009	128.713	117.869	64.0911	16.4072	31.1123	29.9844	0.00229757	0.00104938	0.0159634	DOWN	-2.10222
AT4G37300	1.049	328.499	304.147	306.154	411.5	317.842	166.979	173.774	141.688	0.000119204	0.000357396	0.00963879	DOWN	-1.05285
AT4G37340	1.687	0.448595	0.36886	0.378074	0.524741	0.567358	1.4258	1.46667	1.4367	0	4.07956e-06	0.00171362	UP	1.65721
AT4G37610	1.438	82.0115	43.3098	77.1015	57.0588	42.3987	8.70271	8.8474	12.2054	0.0436233	0.0033769	0.0296595	DOWN	-2.60578
AT4G38410	0.692	1.6008	1.14825	1.26027	1.05916	1.72624	5.66827	6.00214	4.71021	0	0.00467501	0.0355508	UP	2.00647
AT4G38620	1.287	4.32066	4.35151	5.41092	3.29123	3.94907	12.327	10.2353	11.1944	0	0.00132172	0.0180916	UP	1.3997
AT4G38730	1.464	7.87376	8.2328	8.04644	9.47318	7.45511	17.9223	17.3223	16.8935	0	1.48832e-06	0.00121984	UP	1.08082
AT4G38760	6.023	12.6322	14.6405	12.2947	13.1567	13.6111	31.9389	31.237	29.5338	0	0.000104714	0.00543867	UP	1.21991
AT4G39030	2.031	0.96051	1.98414	1.15816	1.28165	0.884513	3.29427	3.87678	3.58318	0.0242226	0.000126829	0.00601123	UP	1.51557
AT4G39250	0.303	0.0361974	0.0315951	0.128877	0.0314148	0.0244872	0.663316	0.776709	0.954792	0	0.00961651	0.0541567	UP	3.98212
AT4G39500	1.41	0.101122	0.0611064	0.193864	0.0337542	0.215748	0.335664	0.374086	0.351083	0.0235114	0.00199306	0.0222139	UP	1.54574
AT4G39675	0.466	14.1923	3.22535	18.2399	2.5549	5.58861	40.1942	30.0696	28.9578	0.000631607	0.00409888	0.0329361	UP	1.91665
AT4G39720	1.059	1.70887	1.54584	2.86389	1.48308	1.7866	4.85488	3.93409	3.56353	0	0.00961345	0.0541486	UP	1.13284
AT5G01200	1.053	6.65569	5.9731	6.44029	7.29495	6.34861	2.65369	3.30414	2.64362	0	4.85813e-05	0.00391493	DOWN	-1.19023
AT5G01270	2.998	14.4689	12.1503	12.3262	11.8714	12.5401	37.7606	33.0824	32.863	0	0.00300684	0.0278506	UP	1.44789
AT5G01510	1.861	8.09179	6.98066	7.36509	6.70554	7.50735	20.6555	17.5096	19.4595	0	0.00381463	0.0316981	UP	1.38982
AT5G01630	3.734	1.75784	1.8558	1.49151	2.18181	2.44471	5.33518	5.24678	5.36659	0.00578384	1.94896e-05	0.00242566	UP	1.44963
AT5G01840	0.965	1.44343	1.31943	1.22747	1.01598	1.36091	3.11068	2.59039	2.83139	0	0.00263911	0.0259388	UP	1.15926
AT5G01850	1.784	2.68663	3.25729	3.31981	3.04662	2.49123	7.09755	6.5781	6.55506	0	1.91322e-05	0.00242611	UP	1.18776
AT5G01970	1.468	10.813	9.84257	10.9938	10.6767	12.1428	23.7331	22.1146	22.9068	0.0251666	1.60471e-05	0.00222829	UP	1.07299
AT5G02020	1.42	127.451	88.8095	121.32	209.083	131.552	34.6221	24.8557	10.1097	0	0.0032334	0.0289516	DOWN	-2.54788
AT5G02140	0.885	0.252903	0.343516	0.657342	0.50688	0.633434	1.00094	1.00223	1.02647	0.115248	0.0024493	0.0249262	UP	1.07664
AT5G02230	1.173	22.1507	24.9984	15.9239	16.0592	12.151	44.9636	35.1325	34.6768	0	0.00842324	0.0501248	UP	1.06732
AT5G02270	1.295	6.42825	7.97654	4.95534	5.60831	6.74356	18.539	14.6613	16.3081	0	0.00445938	0.0346241	UP	1.37961
AT5G02350	1.956	0.229898	0.327921	0.379317	0.218988	0.413466	1.62084	1.69421	1.38373	0	0.00184046	0.0213338	UP	2.31887
AT5G02360	1.029	0.309103	0.15816	0.417441	0.749285	0.584053	1.85869	1.91004	1.96804	0	5.93086e-05	0.00424948	UP	2.10792
AT5G03210	0.535	33.0265	25.1054	35.6435	43.4657	51.7988	9.34333	4.79127	2.12695	0	0.0010028	0.0155722	DOWN	-2.80219
AT5G03240	1.791	488.886	482.777	472.354	577.473	459.359	259.498	248.05	205.536	0	7.25294e-05	0.00460733	DOWN	-1.06172
AT5G03250	2.162	0.829468	1.03654	1.05361	0.893753	0.890185	3.12076	2.4834	2.57415	0.00466971	0.00947326	0.053701	UP	1.53502
AT5G03470	1.986	21.2785	29.0719	19.4462	29.3661	31.3112	8.3866	10.3224	9.04129	0	0.00160602	0.0198707	DOWN	-1.49622
AT5G03490	1.598	6.22517	9.84292	8.07222	8.98855	9.91297	3.90707	3.76144	3.3593	0	0.0014513	0.0188956	DOWN	-1.22763
AT5G03570	1.789	0.423018	0.636795	0.414725	0.718291	0.916567	1.60544	1.37594	1.54165	0	0.000272632	0.00836669	UP	1.27762
AT5G03960	1.357	3.0794	2.2928	3.7889	1.29768	1.6239	4.90673	5.43254	4.60021	0	0.00307974	0.0281917	UP	1.04315
AT5G04360	3.037	29.7904	29.817	31.1549	30.073	25.4789	13.7844	13.4982	12.0471	0	9.86693e-06	0.00228668	DOWN	-1.15841
AT5G04720	2.691	49.1494	41.1287	54.4025	40.4341	29.2291	16.7806	18.1553	14.4657	0	0.00271925	0.0263868	DOWN	-1.38033
AT5G04730	1.903	0.00576344	0.00503065	0.00684002	0.0250097	0.00389891	0.0306623	0.0300817	0.0236482	0	0.00657257	0.0431967	UP	1.59552
AT5G04760	1.128	31.9785	28.1106	30.1288	29.5927	25.6752	9.42776	10.393	9.07401	0.0198951	1.19449e-05	0.00210155	DOWN	-1.59503
AT5G04895	3.811	1.82315	1.82712	1.91883	1.38645	2.4285	4.86567	4.32442	4.46329	0.00141865	5.17931e-05	0.00399187	UP	1.27794
AT5G05140	2.121	33.2861	33.3239	35.1834	29.5703	27.0164	14.541	14.2717	12.1698	0	5.77908e-05	0.00418535	DOWN	-1.21335
AT5G05400	2.625	0.806396	0.988332	0.659506	0.801383	1.24085	2.54148	2.51759	2.53973	0	7.69123e-05	0.00476856	UP	1.49395
AT5G05500	0.73	1.848	2.16383	4.79651	2.59482	1.3518	11.3237	13.061	9.00931	0	0.00686351	0.0442775	UP	2.1255
AT5G05690	1.72	215.434	208.225	193.697	311.676	242.204	100.647	136.328	96.2417	0.000216616	0.00248967	0.0251542	DOWN	-1.07653
AT5G05790	1.343	1.2495	0.63442	1.01768	0.588274	1.04416	3.44203	3.32002	2.76209	0	0.00136858	0.0183665	UP	1.80776
AT5G05900	1.353	0.0891693	0.0636807	0.0865846	0.161811	0.0493546	0.627733	0.728674	0.660474	0	0.000130827	0.00604719	UP	2.89917
AT5G05960	0.515	17.634	18.9847	22.0367	23.3882	25.9834	68.5344	66.3005	75.2625	0.0198828	0.000336427	0.00938978	UP	1.69663
AT5G06220	3.141	27.2802	29.4012	24.4153	28.0665	23.968	76.6771	66.8275	68.1102	0.137906	0.00224578	0.0237318	UP	1.40556
AT5G06250	0.915	0.659268	0.638222	0.526353	0.364103	0.591949	1.26833	1.03577	1.18742	0	0.0015466	0.0194652	UP	1.06579
AT5G06320	0.976	195.075	219.092	256.098	154.573	117.39	21.0777	24.2207	26.1538	0.0441395	0.00240807	0.0246709	DOWN	-2.98406
AT5G06690	0.996	93.678	104.24	98.4998	117.77	93.17	36.0036	42.385	30.305	0	2.86112e-05	0.00291349	DOWN	-1.48577
AT5G06710	1.45	10.5821	9.2102	11.3199	12.1642	8.48909	5.37897	5.41749	4.55346	0	0.000686804	0.0128791	DOWN	-1.01679
AT5G06720	1.303	0.732311	0.859616	0.769206	0.708606	0.301796	2.33362	2.10393	2.59032	0	0.000689792	0.012892	UP	1.79665
AT5G06730	1.392	0.606697	0.47454	0.551708	0.526537	0.197217	1.67208	1.90544	1.67651	0	6.09718e-05	0.00427744	UP	1.89362
AT5G06839	2.009	1.16284	1.73931	1.2116	1.51143	3.03212	9.89772	8.08295	7.59375	0	0.00326894	0.0291455	UP	2.29968
AT5G06870	1.166	77.9506	90.454	68.2867	67.439	60.9161	34.0572	28.6446	20.4391	0	0.000442398	0.0107571	DOWN	-1.39748
AT5G06990	1.005	0.425617	0.466759	1.25632	0.539866	0.612766	1.94179	2.25944	1.6824	0	0.0022321	0.0236542	UP	1.57062
AT5G07322	0.445	1.45416	3.46361	1.9013	6.3957	5.15206	8.14429	8.41888	8.74046	0	0.00643938	0.0427224	UP	1.19921
AT5G07330	0.815	5.47718	3.79409	2.31583	2.39427	4.41537	0.294337	0.163893	0.354972	0	0.00468726	0.0356117	DOWN	-3.76273
AT5G07390	3.16	0.103417	0.0538202	0.136725	0.0878726	0.192632	0.561951	0.455765	0.651632	0.0541679	0.00766059	0.0473384	UP	2.27596
AT5G07560	0.754	0.130916	0.165057	0.0172633	0.0883698	0.226328	0.352544	0.328997	0.332531	0	0.00318904	0.0287227	UP	1.42844
AT5G08250	1.791	0.373555	0.155012	0.327049	0.164757	0.302419	0.763815	0.976644	0.865088	0	0.00125194	0.0175512	UP	1.71496
AT5G08640	1.494	2.69424	4.17151	2.20428	0.911093	2.98474	5.91489	5.14725	5.77055	0	0.00290214	0.0272793	UP	1.11351
AT5G09210	1.812	0.0302644	0.0264165	0.00718353	0.0787971	0.110557	0.232571	0.214127	0.259002	0	0.000205465	0.00736869	UP	2.21564
AT5G09480	0.78	3.97935	3.42431	6.02433	5.55257	6.74426	18.1285	18.878	15.2069	0	0.00166158	0.0201937	UP	1.75822
AT5G09520	0.565	2.23239	1.16913	2.14255	3.04935	3.87397	7.12598	7.86915	5.83724	0	0.00316314	0.0286121	UP	1.47763
AT5G09530	1.538	11.303	5.95688	9.33502	9.83433	15.4616	19.8169	24.239	21.1135	0.00126263	0.00154159	0.0194458	UP	1.06568
AT5G09720	1.144	0.0479363	0.142261	0.0568906	0.191372	0.188085	0.357039	0.450358	0.443956	0	0.000773307	0.0136339	UP	1.73496
AT5G09978	0.561	0.606065	0.699655	0.76568	1.13681	1.17709	2.27669	2.14288	2.8764	0	0.00788078	0.0482115	UP	1.47139
AT5G09980	0.541	1.4394	1.39795	1.03459	1.74187	2.12577	4.15847	4.10324	3.50561	0	0.00043079	0.0106287	UP	1.34142
AT5G10040	0.435	1.38674	0.0220077	2.69008	0.021882	0.496548	8.41251	8.15988	7.22952	0.023844	2.90957e-05	0.00292734	UP	3.10294
AT5G10130	0.847	0.634502	0.689461	0.78376	1.0901	2.68929	4.27888	5.97012	6.1405	0	0.00477282	0.0359933	UP	2.21411
AT5G10170	1.884	4.51469	5.13641	5.27031	2.87078	3.4986	10.0076	9.60917	8.0063	0.00917273	0.00236607	0.0244871	UP	1.11261
AT5G10278	2.096	0.223605	0.15886	0.259173	0.100255	0.22879	0.419443	0.323988	0.423368	0.0894266	0.00689933	0.0444318	UP	1.00245
AT5G10290	2.206	13.588	10.732	14.3914	11.2058	11.412	25.7954	26.0624	29.2916	0	0.000584017	0.0118582	UP	1.14097
AT5G10330	1.698	11.3855	12.6682	11.147	11.2336	12.4102	32.9721	30.3904	32.8951	0.26626	0.00049815	0.0111897	UP	1.44696
AT5G10380	1.179	16.5122	11.8941	16.7482	7.75866	6.97911	3.18395	1.78572	2.02301	0.00123667	0.00859393	0.0507094	DOWN	-2.36149
AT5G10580	1.87	0.791795	1.36689	1.17636	1.30818	2.74963	8.42146	8.11234	5.95106	0.00494234	0.00751457	0.0467976	UP	2.34171
AT5G10680	0.726	0.226608	0.14505	0.0896457	0.432668	0.337256	0.598328	0.639566	0.753022	0.000434787	0.0017269	0.0205273	UP	1.4303
AT5G10695	0.559	38.9123	52.6182	59.117	42.5855	31.5803	9.98016	10.7739	10.9661	0.345101	0.00212645	0.0229545	DOWN	-2.08829
AT5G10720	3.291	0.830551	0.560203	0.923006	0.625167	0.820476	2.12444	2.00475	1.8908	0.0101786	2.80739e-05	0.00290276	UP	1.41622
AT5G10800	3.088	3.03675	2.43363	3.37341	2.98692	2.58294	6.83173	5.97956	5.79976	0.00162126	0.00220241	0.0234877	UP	1.10569
AT5G10945	0.086	14.1561	7.90356	15.2869	13.3926	9.05886	2.33703	4.36368	1.27084	0	0.00173311	0.020543	DOWN	-2.1702
AT5G11920	1.917	0.00572135	0.164799	0.169752	0.193651	0.150947	1.39002	0.985448	1.17713	0	0.00806409	0.0489056	UP	3.11194
AT5G12330	2.263	3.63979	1.91636	5.04442	2.42699	2.1672	10.9756	9.4299	8.79255	0	0.000636521	0.0124142	UP	1.67926
AT5G12360	1.047	0.935689	1.66078	0.872038	1.03643	1.20228	2.62098	2.35855	2.43861	0.0454599	0.000215529	0.00753656	UP	1.11524
AT5G12920	2.068	0.853878	1.09714	0.547602	0.82391	1.13017	1.83403	2.27297	2.21033	0	0.00161567	0.0199094	UP	1.2416
AT5G12970	2.557	0.613375	0.482972	0.575233	0.621674	0.705112	1.75206	1.36163	1.55632	0.000699761	0.00832411	0.0497374	UP	1.37621
AT5G13190	0.775	44.7629	55.4018	55.4421	38.8731	32.7134	18.4128	20.0339	21.4436	0	0.00414394	0.0331476	DOWN	-1.18656
AT5G13900	0.583	1.14758	0.673253	0.379557	0.473485	0.598152	1.94613	2.10566	1.75334	0	0.000270436	0.00834501	UP	1.56411
AT5G13910	0.636	3.01788	1.36977	3.00854	0.972822	2.90486	9.20517	8.2708	8.21811	0	2.64315e-05	0.00282868	UP	1.92542
AT5G13930	1.491	11.571	16.9829	10.415	7.0672	12.0973	34.2432	24.7215	29.0229	0	0.00826427	0.049565	UP	1.3349
AT5G13990	2.325	0.655988	0.448894	0.913444	0.593824	0.558868	1.57185	1.65732	1.26133	0.00253544	0.00494325	0.0367263	UP	1.2389
AT5G14000	1.056	6.05515	2.71063	9.15843	4.66019	3.82926	11.1187	11.0287	11.4637	0	0.00568079	0.0396876	UP	1.08462
AT5G14020	1.46	0.638538	0.347525	1.16792	0.56721	0.828356	2.61555	2.48761	2.90183	0	5.69959e-05	0.00417275	UP	1.91023
AT5G14120	2.362	131.386	141.034	103.4	104.669	87.1539	40.0174	48.0488	57.2314	0.00021287	0.00138894	0.0184555	DOWN	-1.22901
AT5G14130	1.19	0.986183	0.876885	0.557853	1.15984	1.46543	2.62059	2.56136	2.95568	0.000422432	0.000135468	0.00611863	UP	1.42638
AT5G14150	1.416	0.147167	0.358324	0.523972	0.32939	0.392989	1.51554	1.50481	1.18499	0	0.00242574	0.0247764	UP	2.00031
AT5G14210	2.453	20.0546	20.9974	19.4908	18.589	20.2147	43	39.5079	38.7499	0.00239304	0.0020491	0.0225616	UP	1.0245
AT5G14330	0.537	5.65752	2.7276	7.87781	5.26453	2.66665	16.0213	16.2391	12.1994	0	0.00311156	0.0283363	UP	1.61481
AT5G14340	0.86	0.267819	0.100186	0.348117	0.0110682	0.0431374	0.399557	0.525121	0.426104	0	0.00846099	0.0502693	UP	1.54721
AT5G14690	0.786	2.2745	2.13147	3.62675	1.68333	2.04842	6.31016	4.94445	4.75217	0	0.00804528	0.0488356	UP	1.18121
AT5G14750	0.816	0.577961	0.739117	1.38779	1.48146	0.84562	5.80803	6.0878	5.86955	0	8.74751e-07	0.00117581	UP	2.55684
AT5G14960	1.119	5.36139	7.93072	6.36288	8.7361	8.37444	3.34308	3.73452	3.42991	0	0.0033581	0.0295562	DOWN	-1.06997
AT5G15120	1.189	3.16397	1.55396	3.66741	1.30492	2.01559	9.40608	10.0732	9.98674	0	1.47879e-05	0.00221845	UP	2.06879
AT5G15240	1.496	4.23024	5.38159	3.40111	4.02699	5.4703	2.17954	1.78999	1.84359	0.00997976	0.00212139	0.0229366	DOWN	-1.21623
AT5G15265	0.438	2.22862	1.7267	1.69394	2.15148	3.16774	5.69886	5.24243	5.651	0	4.62561e-05	0.00381914	UP	1.33411
AT5G15310	1.325	31.2645	28.5321	23.9996	37.2342	43.2915	12.5998	15.5487	18.9666	0	0.00478512	0.0360617	DOWN	-1.0653
AT5G16110	1.474	185.315	142.671	192.06	183.496	160.509	78.9573	90.7618	74.1595	0	0.000165249	0.00664239	DOWN	-1.08799
AT5G16200	0.638	9.05963	8.47795	9.93584	8.42956	6.98934	3.24169	3.00086	2.73078	0	0.000149392	0.00640328	DOWN	-1.52004
AT5G16370	1.907	82.3904	75.2701	84.3726	123.396	110.096	18.4763	26.8703	23.1463	0.0187556	0.000965267	0.0152357	DOWN	-2.05853
AT5G16460	1.231	0.258381	0.287744	0.264349	0.131452	0.283284	0.0158003	0.00516703	0.0261126	0	0.00105732	0.0159974	DOWN	-3.96481
AT5G16850	3.614	0.0882869	0.162369	0.104945	0.188017	0.133983	0.290395	0.28406	0.305836	0.00547182	0.000485995	0.0110571	UP	1.11451
AT5G16900	2.601	0.299391	0.128822	0.165147	0.179322	0.122662	0.815096	1.00508	0.709382	0	0.00920239	0.0528339	UP	2.23534
AT5G16920	1.118	0.0490511	0.00856291	0.104784	0.00851403	0.0597287	0.144977	0.187746	0.14376	0	0.00287622	0.0271039	UP	1.78374
AT5G17165	0.457	2.03997	1.65491	1.79441	3.18678	1.7372	5.32006	5.55336	4.26251	0	0.00361922	0.030751	UP	1.27652
AT5G17390	0.858	0.728632	1.12867	1.47157	0.832053	0.563109	2.60695	2.79768	2.28534	0.00183124	0.000447059	0.0108079	UP	1.43992
AT5G17850	1.68	8.34991	8.67868	11.2578	6.91805	6.69092	3.60059	3.02508	3.30248	0	0.00286835	0.0270905	DOWN	-1.34023
AT5G17970	2.343	0.0046811	0.00408593	0.00555551	0.00406261	0.00316672	0.0138356	0.0135737	0.0137194	0	1.08737e-05	0.00216212	UP	1.6693
AT5G18065	0.946	10.8635	4.92834	11.2141	5.40332	4.18041	18.9498	13.8844	15.9364	0	0.00690616	0.0444502	UP	1.15155
AT4G32340	0.96	147.026	217.524	167.656	201.747	125.199	78.4691	73.6573	75.8681	0	0.00475687	0.0359132	DOWN	-1.17695
AT5G18430	1.292	2.0119	2.39333	2.08547	2.29126	1.72857	3.98938	4.64246	4.10516	0	0.00167351	0.0202727	UP	1.01416
AT5G18680	1.474	27.0624	32.5194	29.2034	39.6827	36.0159	76.9956	67.1144	68.4633	0	0.000492218	0.0111159	UP	1.10698
AT5G18840	1.83	0.401554	0.528364	0.192048	0.608572	0.612221	2.15758	1.93599	1.73897	0	0.000731911	0.0133019	UP	2.05288
AT5G19040	1.577	1.4953	0.783107	0.734606	0.947644	1.10565	2.47906	1.84325	2.13211	0	0.00678621	0.0439899	UP	1.08632
AT5G19120	1.42	255.804	235.253	274.619	271.463	247.975	69.0192	99.3496	95.7413	0.000481453	9.4347e-05	0.00524039	DOWN	-1.54572
AT5G18130	2.02	69.0919	57.4637	92.5916	72.196	42.6041	25.4168	27.5994	15.5408	0	0.00395819	0.0323392	DOWN	-1.54728
AT5G19390	3.441	19.3507	21.0023	17.1398	18.8686	20.4994	40.3492	39.2451	41.0977	0	3.85708e-07	0.000682175	UP	1.05431
AT5G19520	2.53	1.56551	1.04815	2.20716	1.17025	1.69233	5.96829	4.85468	4.66006	0.000485432	0.00391989	0.0321985	UP	1.74784
AT5G19550	1.624	28.2232	24.175	28.3655	20.532	28.1115	58.5859	59.2078	59.5745	0	1.76911e-05	0.00233134	UP	1.19179
AT5G19600	2.309	7.7093	7.83197	10.9195	9.69183	7.88878	20.5901	17.7155	16.2296	0	0.00698415	0.0447892	UP	1.0453
AT5G20230	0.932	172.414	102.934	181.743	94.4822	100.587	4.27819	4.63397	8.9329	0	0.00280214	0.0267737	DOWN	-4.45466
AT5G20250	2.945	381.699	313.358	308.15	286.74	271.317	30.6909	54.5933	102.215	0.000315279	0.000330673	0.00931427	DOWN	-2.3208
AT5G20400	1.238	5.51935	6.13219	8.73729	6.14332	6.01122	11.8408	13.682	14.3586	0	0.00157007	0.0196063	UP	1.03032
AT5G20470	1.671	0.00656363	0.0515619	0.0389484	0.0968389	0.0133207	0.182357	0.285486	0.250078	0	0.00889146	0.0517294	UP	2.52953
AT5G20490	5.208	16.0916	16.9537	15.8583	14.9488	15.7867	44.4512	43.0184	39.0562	0	0.00279232	0.0267179	UP	1.40485
AT5G20550	1.242	0.626985	1.00975	0.890827	1.20325	1.86984	2.60484	2.10484	2.16886	0	0.00422574	0.0335543	UP	1.03347
AT5G20820	0.646	1.7827	0.72615	1.10822	0.663067	0.930326	4.62668	4.85416	4.72715	0	1.59861e-05	0.00224769	UP	2.18419
AT5G20850	1.292	1.34976	1.71164	1.1183	1.87869	2.46364	4.08975	3.52	3.97579	0	0.000308485	0.00895967	UP	1.18002
AT5G21050	1.068	0.257111	0.493009	0.280319	0.294117	0.340414	0.698847	0.840659	0.716668	0.00151278	0.000929005	0.0149156	UP	1.17535
AT5G21170	1.376	87.1289	66.6863	87.4928	105.501	86.1077	30.518	37.5582	26.1596	0	0.000280005	0.00848449	DOWN	-1.46278
AT5G21940	1.159	319.903	222.681	330.67	331.692	360.604	65.7456	116.659	116.47	0	0.000324863	0.00920464	DOWN	-1.6521
AT5G22270	0.646	70.2722	65.7537	70.1806	69.7104	45.7238	18.6171	23.8572	15.4951	0	0.000210314	0.00743152	DOWN	-1.73512
AT5G22430	0.931	0.0117807	0.0514142	0.0139813	0.0102242	0.00796953	0.062675	0.0888164	0.0621486	0	0.00723496	0.0458291	UP	1.90054
AT5G22660	1.611	0.102121	0.00594248	0.169676	0.135915	0.124351	0.454762	0.438255	0.514793	0.000141722	6.893e-05	0.00452407	UP	2.12472
AT5G22690	3.419	7.5482	11.6286	12.0343	7.84269	6.23475	3.04732	3.19798	3.49558	0	0.00726388	0.0458826	DOWN	-1.48006
AT5G23000	1.304	0.967255	0.932372	1.12797	0.766459	0.756757	1.95396	1.95599	2.08546	0	1.1975e-05	0.00209588	UP	1.1347
AT5G23020	1.799	14.0527	4.93301	23.3343	5.96307	3.33657	44.9728	42.3605	38.3699	0	0.000396561	0.0102351	UP	2.02099
AT5G23030	0.926	0.153976	0.175752	0.463873	0.339219	0.34454	0.959204	1.20206	0.881722	0	0.00491761	0.0366492	UP	1.77943
AT5G23050	2.45	32.3887	28.8177	38.2474	33.3776	27.0468	18.3784	17.2983	12.1048	0	0.00164752	0.0201175	DOWN	-1.00549
AT5G23130	1.741	7.61637	12.1797	8.88954	9.3	7.92252	3.0648	3.63516	3.53388	0	0.00160793	0.0198797	DOWN	-1.42844
AT5G23190	2.173	1.6101	0.577131	1.3957	1.06445	1.69016	2.80757	3.5623	2.71299	0	0.0054102	0.0386325	UP	1.25619
AT5G23350	1.135	0.811071	0.776962	0.685583	0.414981	0.191244	1.84184	1.60655	1.81701	0.0132779	0.0001632	0.00659949	UP	1.60752
AT5G23370	0.941	0.757608	0.539199	0.650136	0.171964	0.670211	1.05415	1.20994	1.45522	0	0.00765966	0.0473414	UP	1.15219
AT5G23790	1.081	0.436278	0.203688	0.541855	0.378634	0.281411	0.101959	0.100028	0.0535249	0	0.00711901	0.0453942	DOWN	-2.11274
AT5G23830	0.777	3.76887	7.4295	6.65067	9.6902	11.8313	22.1369	22.5528	22.8281	0	0.000363473	0.00972464	UP	1.51512
AT5G23980	2.256	18.4499	21.2302	20.7307	33.2351	21.2755	8.26228	10.7956	5.94733	0.000249804	0.00302854	0.0279361	DOWN	-1.46338
AT5G23990	1.974	0.250026	0.315231	0.42861	0.554691	0.349557	0.738987	0.840993	1.01938	0.00028548	0.00936423	0.0533348	UP	1.19055
AT5G24100	2.248	0.307372	0.225706	0.492174	0.326041	0.458776	1.23726	1.08368	1.26691	0	0.000132417	0.00605409	UP	1.72404
AT5G24105	0.576	0.628365	1.57893	1.15251	0.677546	0.656947	1.83471	2.61713	2.19878	0	0.00885906	0.0516302	UP	1.23954
AT5G24190	1.016	0.0107951	0.00942257	0.0640579	0.00936879	0.00730279	0.0574315	0.0813859	0.0822599	0	0.00787709	0.0482065	UP	1.86792
AT5G24210	1.355	126.458	92.3773	110.847	68.6259	55.0039	12.895	6.4545	6.8939	0	0.00300147	0.0278238	DOWN	-3.37351
AT5G24280	4.826	1.57949	1.68813	1.58324	1.39447	1.45287	3.93221	3.71014	3.92849	0	1.32658e-05	0.00218521	UP	1.32487
AT5G24290	1.915	1.6552	4.46422	2.97036	4.87615	4.22706	11.0539	10.9775	8.49022	0	0.00323785	0.0289682	UP	1.48341
AT5G24450	2.003	25.8617	26.6839	25.7667	28.8032	28.3709	12.1284	12.337	12.2577	0	1.70322e-05	0.0022894	DOWN	-1.14642
AT5G24460	1.176	40.3553	39.8645	35.1868	38.1962	33.4956	21.8042	16.4109	13.6943	0.000386904	0.00376119	0.031464	DOWN	-1.11276
AT5G24470	2.257	41.7574	34.5225	31.4716	45.9655	51.6942	16.3707	11.554	10.8953	0.000201632	0.000698487	0.0129823	DOWN	-1.66668
AT5G24590	1.824	48.7479	40.8913	58.5388	37.8817	26.5097	11.9679	12.9619	12.241	0	0.00488605	0.0365193	DOWN	-1.77873
AT5G24670	1.94	59.8651	59.2708	71.477	63.2895	53.5629	33.2824	28.6523	29.5101	0.000200844	0.000131541	0.00605523	DOWN	-1.01248
AT5G24760	1.632	3.62234	6.68139	3.83638	4.68352	6.58765	9.93562	10.3711	11.7824	0	0.000710984	0.01307	UP	1.07358
AT5G24870	2.482	8.44461	9.2069	8.45919	8.14956	6.7829	4.47463	4.20539	2.81039	0	0.00193033	0.0218333	DOWN	-1.09975
AT5G24880	1.332	0.205853	0.337798	0.732914	0.292993	0.395491	1.08543	1.27499	0.863948	0	0.00879896	0.0514227	UP	1.45142
AT5G24890	1.123	109.102	102.204	108.502	117.505	125.116	40.6265	52.1253	49.4793	0	2.4013e-05	0.00270783	DOWN	-1.24647
AT5G24900	1.663	0.0593568	0.109377	0.117407	0.1202	0.272157	0.760228	0.600491	0.506428	0	0.00997679	0.0555066	UP	2.19738
AT5G24960	1.494	0.198214	0.531852	0.426915	0.414133	0.412202	1.17603	0.983469	0.933787	0	0.00200828	0.0222874	UP	1.37819
AT5G25210	0.932	32.1856	32.3049	28.6169	38.4322	34.0969	11.2068	13.6016	12.0094	0	4.89356e-05	0.00390601	DOWN	-1.43258
AT5G25810	1.017	0.722561	1.81677	0.62715	1.7128	2.34189	3.39788	4.38426	4.87385	0	0.0058746	0.0404861	UP	1.54648
AT5G25840	0.775	79.492	53.7959	73.4806	63.9042	48.5675	33.8892	32.7551	28.6772	0	0.00404981	0.0327218	DOWN	-1.0068
AT5G25980	1.864	119.193	214.737	127.24	106.651	184.444	52.9974	45.1215	46.7856	0	0.00775661	0.0477037	DOWN	-1.63917
AT5G26000	1.84	1229.74	1302.26	1223.18	1210.67	1148.67	531.605	502.796	459.043	0	7.68695e-07	0.0011231	DOWN	-1.29663
AT5G26010	1.115	3.492	3.75206	2.97688	6.08684	4.29208	10.2746	11.7572	9.58862	0	0.000820464	0.0140453	UP	1.35518
AT5G26170	0.522	8.50952	5.99709	8.45328	5.78051	5.67133	15.5626	14.5368	12.8209	0	0.0011928	0.0170638	UP	1.05573
AT5G26260	1.332	8.40702	17.4864	21.0786	19.8449	16.6162	61.1686	54.3183	49.7566	0	0.0008246	0.0140588	UP	1.72287
AT5G26280	1.235	29.9728	49.6495	31.8616	47.0848	68.0864	98.8466	95.162	116.444	0	0.00121383	0.0172545	UP	1.19084
AT5G26290	1.002	2.50662	7.61471	5.01668	9.1292	11.5589	25.3059	24.7252	23.361	0.00305942	0.000154104	0.00646507	UP	1.77158
AT5G26300	1.05	0.0313366	0.0455873	0.0123967	0.00906542	0.0353316	0.117318	0.151443	0.116333	0	0.00281366	0.0268076	UP	2.26299
AT5G26310	1.701	0.444903	0.410848	0.344353	0.475655	0.850575	0.987181	1.11058	1.15275	0	0.00148463	0.0190709	UP	1.10059
AT5G26340	1.993	29.1063	45.5994	33.0802	46.6096	44.2088	9.33307	8.0904	7.3773	0	0.000794319	0.0137802	DOWN	-2.26447
AT5G26730	0.813	0.256321	0.129528	0.208137	0.152205	0.264661	0.502402	0.618067	0.498183	0	0.00229755	0.0240146	UP	1.41619
AT5G26670	1.602	3.34786	4.10542	3.48571	2.7748	3.20962	7.45872	7.69071	7.38805	0	7.48946e-06	0.00206292	UP	1.15027
AT5G26660	1.391	0.575594	0.667587	0.271373	0.636404	1.18949	1.62667	1.87023	1.31721	0	0.00759772	0.0470972	UP	1.2642
AT5G26920	2.173	21.3249	12.5867	26.6261	18.5336	8.1913	1.69767	1.56601	1.07987	0	0.0077181	0.0475365	DOWN	-3.59145
AT5G27060	2.874	0.0114487	0.0566272	0.0498198	0.0698787	0.064541	0.0924908	0.0951658	0.118703	0.00490754	0.00831584	0.0497057	UP	1.01696
AT5G27520	1.358	18.5839	29.5448	19.3906	26.1799	21.3902	10.9568	12.1077	10.2588	0	0.00374631	0.0314413	DOWN	-1.05119
AT5G28520	1.362	0.523428	0.569339	0.372721	0.286539	0.637369	0.157086	0.079391	0.259612	0	0.00967252	0.054381	DOWN	-1.53101
AT5G34940	2.449	2.87071	2.62299	2.93922	2.00946	2.33587	8.51655	8.22543	8.29277	0	2.21729e-07	0.000496733	UP	1.70721
AT5G35490	0.732	1.57325	1.55632	1.01358	1.57344	0.902114	4.17168	5.65678	5.24327	0	0.00814138	0.0491702	UP	1.92419
AT5G35740	0.579	7.33083	3.68714	7.62109	3.79761	5.57434	11.4551	12.0291	15.2895	0	0.00753503	0.0468902	UP	1.20605
AT5G35960	1.29	0.382599	0.333953	0.0706325	0.287774	0.189805	0.608131	0.48814	0.593056	0	0.00364359	0.0308178	UP	1.15455
AT5G36180	1.769	0.849402	1.17434	1.11108	1.52278	1.9671	5.06136	5.17407	4.69904	0	5.22973e-06	0.00202	UP	1.90968
AT5G36260	1.716	0.121439	0.083683	0.144123	0.138676	0.263752	0.449605	0.619011	0.573209	0	0.00417763	0.0333218	UP	1.86409
AT5G36870	5.616	0.0449181	0.0357977	0.0347665	0.0152543	0.0224597	0.0912014	0.0985352	0.0950145	0	7.8267e-05	0.00482584	UP	1.63129
AT5G37450	2.808	0.0820243	0.0852326	0.078804	0.0711868	0.0924812	0.182403	0.206131	0.18545	0	0.00106353	0.0160264	UP	1.22331
AT5G37540	1.597	19.3465	20.2676	22.7321	14.3347	13.9426	7.12481	7.0855	8.37733	0	0.00273938	0.02646	DOWN	-1.26739
AT5G37600	1.494	22.2366	28.7264	27.1222	26.6128	26.5746	53.9978	60.5621	49.7747	0	0.00658839	0.0432415	UP	1.06104
AT5G37690	1.382	1.34122	1.42007	2.23222	2.23848	3.48433	6.17844	6.65057	5.78232	0	0.00012209	0.00593735	UP	1.53334
AT5G37740	0.92	24.5226	21.4255	35.074	25.1107	22.9767	56.7507	55.4687	47.5531	0	0.00102619	0.015775	UP	1.04439
AT5G37800	0.924	0.0830896	0.0103607	0.239482	0.113318	0.168628	0.680614	0.612657	0.480082	0	0.00332744	0.0294251	UP	2.26507
AT5G38005	0.545	0.9056	1.2823	1.4569	2.04346	2.16463	4.17553	5.2869	4.47076	0	0.00163088	0.0200088	UP	1.5642
AT5G38010	1.523	0.280857	0.748015	0.555533	0.656246	0.531018	1.76665	1.85749	1.53231	0.00396745	0.00040318	0.010303	UP	1.63259
AT5G38020	1.446	1.11499	7.42165	1.37727	6.08907	10.2982	20.0196	17.925	21.043	0	0.000483289	0.0110479	UP	1.90225
AT5G38030	1.892	1.30431	4.0631	1.96074	3.73805	5.00002	7.72043	6.52535	6.93523	0	0.00300023	0.02782	UP	1.13571
AT5G38280	2.316	0.9424	1.58315	1.20836	1.40972	1.75239	3.89395	3.4522	3.44486	0	9.70902e-05	0.00530507	UP	1.38296
AT5G38340	3.18	0.431125	0.496729	0.437979	0.55376	0.720964	1.27425	1.49014	1.60319	0	0.00259288	0.0257328	UP	1.46296
AT5G38344	1.158	0.00947135	0.157075	0.0337217	0.238378	0.275513	0.475896	0.587725	0.549624	0	0.000778894	0.0136679	UP	1.91261
AT5G38420	0.861	1700.25	1140.36	1333	954.904	738.474	2978.52	2215.93	2410.06	0.000133401	0.00814697	0.0491686	UP	1.1112
AT5G38450	1.849	0.10084	0.0673084	0.063358	0.0463322	0.132422	0.199866	0.154801	0.21905	0	0.0084911	0.0503325	UP	1.22077
AT5G38550	2.074	0.215465	0.23541	0.444226	0.417647	0.460045	1.82834	1.86395	1.63035	0.0438834	7.62626e-05	0.00473702	UP	2.32308
AT5G38565	1.311	1.04575	0.956603	1.73753	1.05279	0.752717	3.40736	3.35255	2.48625	0	0.00805515	0.048869	UP	1.47453
AT5G38850	3.294	7.50167	9.36962	7.30195	8.88007	8.99411	3.47788	4.09945	3.60957	0.000459438	0.000107808	0.00552251	DOWN	-1.17324
AT5G38900	0.978	0.572664	0.600754	0.789777	0.302481	0.402644	1.63961	1.21619	1.40768	0.00616722	0.00425455	0.0337034	UP	1.41307
AT5G38990	2.785	15.5676	18.2217	14.6617	13.9824	10.5363	8.88554	5.40582	5.74564	0.00258742	0.00362057	0.0307469	DOWN	-1.12766
AT5G39020	2.442	2.97775	3.60274	4.09899	3.51202	2.37295	1.38323	1.15387	1.16626	0	0.00155477	0.019524	DOWN	-1.42422
AT5G39100	0.835	0.249567	0.149046	0.545604	0.239392	0.257688	1.06374	1.01313	1.03941	0	0.000247971	0.00795876	UP	1.84942
AT5G39120	0.666	0.0967117	0.186867	0.147575	0.240194	0.055703	1.735	2.02706	1.51873	0.367321	0.00615943	0.0416294	UP	3.59759
AT5G39320	1.792	9.62745	9.62141	10.3363	9.41777	13.3943	20.6187	25.5099	24.4637	0	0.00413565	0.0331206	UP	1.16699
AT5G39330	0.78	0.267165	0.405025	0.216943	0.378307	0.16171	0.939258	1.29659	1.27754	0	0.00851583	0.050408	UP	2.03467
AT5G39580	1.248	9.27168	12.0204	10.0649	9.6331	10.6955	1.80267	2.69613	4.97109	0.00378788	0.00603438	0.0410567	DOWN	-1.71137
AT5G39890	1.238	3.46399	1.91003	5.16246	2.77564	2.81083	14.0403	13.5484	12.2918	0	2.15103e-05	0.00257236	UP	2.04354
AT5G39970	2.265	1.00166	0.68604	0.922609	0.826914	0.549999	2.72008	2.57202	2.6743	0.0205405	1.62624e-06	0.0012144	UP	1.73551
AT5G40020	0.936	2.49588	2.44447	2.57272	2.32883	2.71895	5.47901	5.95968	5.02088	0	0.00583305	0.0403155	UP	1.12696
AT5G40230	1.279	0.437341	0.651196	0.905765	0.513518	0.748345	1.35345	1.49691	1.15108	0	0.00425651	0.033711	UP	1.03431
AT5G40340	3.096	37.3707	43.3057	36.7247	39.2277	37.9489	16.1687	16.6103	16.822	0	3.15892e-05	0.00307688	DOWN	-1.23494
AT5G40590	0.976	0.101138	0.245218	0.280069	0.243819	0.159644	1.86663	1.88342	1.85095	0	1.95793e-07	0.000598131	UP	3.18016
AT5G40670	1.272	30.8427	44.5175	33.9433	29.9554	31.9009	92.5054	80.1928	77.9407	0	0.00148132	0.0190648	UP	1.28723
AT5G40730	0.446	13.1565	14.1883	22.0931	23.1565	25.6693	44.555	60.2833	54.0117	0	0.00612097	0.0414362	UP	1.4299
AT5G40860	0.843	0.27322	0.397469	1.21982	0.304869	0.184831	1.57662	1.8184	1.6549	0	0.00186036	0.0214682	UP	1.82214
AT5G40980	0.373	4.96934	3.92686	3.4548	3.54718	4.23695	7.83915	7.72482	9.11771	0	0.00216572	0.0232291	UP	1.03069
AT5G41040	1.753	8.42384	2.98966	4.04679	3.91499	4.66002	9.8099	13.407	10.9251	0.00103484	0.0060731	0.0412534	UP	1.24336
AT5G41100	2.239	9.29253	16.9532	12.2841	13.5234	11.8999	4.83285	4.85498	4.62573	0	0.00296485	0.0275986	DOWN	-1.42267
AT5G41250	1.686	0.00650523	0.00567813	0.00772038	0.00564572	0.00440073	0.0192271	0.018863	0.0190656	0	1.08737e-05	0.00225555	UP	1.6693
AT5G41315	1.929	0.119401	0.203477	0.101217	0.162839	0.188472	0.473902	0.392386	0.403266	0	0.000823897	0.0140611	UP	1.44826
AT5G41570	0.834	0.486582	0.19514	0.577473	0.330986	0.507097	1.11166	0.86181	1.11774	0	0.00334452	0.0294908	UP	1.29662
AT5G41590	0.801	0.123234	0.490021	0.40626	0.415923	0.453885	0.963198	0.944961	1.17984	0	0.0014933	0.0191311	UP	1.44577
AT5G41680	1.605	0.307444	0.165044	0.481267	0.39401	0.156927	0.593639	0.790947	0.690355	0.400077	0.00432797	0.0340284	UP	1.20057
AT5G41690	2.268	3.47701	3.89602	3.78215	4.43618	3.90283	2.32978	1.71916	1.77731	0	0.000900117	0.0146761	DOWN	-1.00544
AT5G41780	1.614	0.00679543	0.0533829	0.00806478	0.0294879	0.0229852	0.124526	0.153695	0.187212	0	0.0079709	0.0485331	UP	2.68392
AT5G42050	1.56	278.421	230.048	310.72	236.277	202.028	69.5259	73.6568	63.0159	0	0.000560312	0.0116876	DOWN	-1.87148
AT5G42180	1.229	3.22279	2.18957	3.61237	2.84411	4.26825	7.35032	9.03506	7.88677	0.000589513	0.0013387	0.0181981	UP	1.32589
AT5G42200	0.766	20.2031	24.5582	14.9707	25.9092	24.2058	5.08683	8.8102	7.54518	0	0.000743091	0.013418	DOWN	-1.62001
AT5G42500	0.691	1.03171	0.263232	0.772328	0.978042	2.22267	4.5318	5.05352	4.54956	0	8.06454e-05	0.00489171	UP	2.1609
AT5G42630	1.293	0.704045	0.762609	1.37917	0.714086	0.900915	2.53218	2.30714	2.29214	0	6.43299e-05	0.00440274	UP	1.41385
AT5G42655	0.39	0.53433	0.270017	0.767643	0.658986	0.475618	1.91177	1.74509	1.53305	0	0.000708863	0.0130524	UP	1.6762
AT5G42785	0.595	0.423966	0.43442	0.415655	0.463936	0.586089	1.99405	2.06319	1.91247	0	7.82091e-06	0.00208582	UP	2.09798
AT5G42830	1.465	0.531547	0.908323	0.506446	0.370352	0.521653	2.01361	1.82786	1.97915	0	1.45352e-05	0.00224055	UP	1.7731
AT5G42840	2.159	0.127001	0.412376	0.102493	0.0925857	0.223379	0.555546	0.574488	0.503237	0	0.00273868	0.0264608	UP	1.50688
AT5G42860	1.295	1.10949	2.00338	1.75899	2.24185	2.98504	5.59223	5.63369	4.85024	0	0.000178897	0.00688622	UP	1.40771
AT5G43030	1.695	0.0970604	0.163791	0.191985	0.207783	0.284529	0.478125	0.514103	0.443767	0	0.000220077	0.00758511	UP	1.3404
AT5G43180	0.871	1.39774	1.32993	1.41972	1.78134	2.61519	4.74157	3.93613	4.17032	0	0.000465167	0.0109388	UP	1.32554
AT5G43190	1.432	20.2583	19.9689	20.1157	25.638	28.0982	7.91859	10.9312	11.0845	0	0.000704129	0.0129937	DOWN	-1.1932
AT5G43230	2.796	0.145139	0.0992942	0.228116	0.0646835	0.1088	0.340864	0.457255	0.397784	0	0.00217088	0.0232771	UP	1.62539
AT5G43240	1.676	0.00654405	0.00571201	0.0388322	0.00567941	0.00442699	0.158603	0.14801	0.11124	0	0.00463335	0.0353139	UP	3.50848
AT5G43290	1.092	3.22406	2.76154	4.35077	1.78693	1.21622	10.5385	9.45356	11.9336	0	0.000656981	0.0125796	UP	1.99597
AT5G43350	1.783	4.92068	6.79475	10.6532	7.61841	9.93944	18.1907	17.7058	15.4823	0.176555	0.000511179	0.0113534	UP	1.10079
AT5G43690	1.262	0.112981	0.40205	0.257856	0.610946	0.617323	0.847668	1.05338	1.1462	0	0.00401746	0.0325543	UP	1.34364
AT5G43860	1.127	4.52532	6.77014	3.47647	4.75512	4.34368	1.91567	1.31502	2.15395	0.00156712	0.00340216	0.029726	DOWN	-1.41136
AT5G43910	1.479	1.01595	1.60012	1.59495	1.57961	1.98166	3.67377	3.95992	3.96696	0.00615848	1.60353e-05	0.0022359	UP	1.31476
AT5G44005	0.656	37.7353	42.7735	38.3552	33.2138	28.4683	13.451	16.6287	17.3562	0	0.000435459	0.0106889	DOWN	-1.19135
AT5G44110	1.077	4.38917	5.04	4.84646	3.93298	5.44933	12.3949	13.3532	12.4699	0	1.00325e-05	0.00230912	UP	1.42889
AT5G44160	1.724	1.03698	1.64923	1.12498	1.2975	1.62251	2.74904	3.22089	2.97208	0	0.000303172	0.00886666	UP	1.1467
AT5G44350	1.188	1.00631	0.717194	0.799839	0.616952	1.06798	1.64267	1.57945	1.84534	0	0.000504613	0.0112896	UP	1.005
AT5G44390	1.86	1.66876	1.65217	1.21068	1.02863	0.737974	4.71613	3.66248	3.95068	0	0.00285419	0.0270175	UP	1.70604
AT5G44460	0.758	0.593247	0.745154	1.66571	1.3939	1.45848	2.86534	2.52579	3.09572	0	0.000859238	0.0143508	UP	1.27216
AT5G44480	1.311	2.38431	2.89902	3.60413	2.91151	4.35217	11.3892	10.4555	9.62623	0	0.000379898	0.00995794	UP	1.69935
AT5G44490	1.368	4.06483	3.05815	2.74984	2.67887	4.5288	8.77246	6.56055	7.44872	0	0.00801687	0.0487335	UP	1.15249
AT5G44550	0.858	2.97844	3.87173	3.01899	5.84656	7.22074	12.6569	15.7236	12.176	0	0.00247621	0.0250786	UP	1.55926
AT5G44560	0.999	9.65037	8.91511	10.7701	8.28002	8.85008	18.1781	19.3875	18.692	0.139929	3.09416e-06	0.00159963	UP	1.01285
AT5G44565	0.576	0.0571241	0.182824	0.203384	0.0826275	0.0644065	0.821678	0.607351	0.8371	0	0.00588571	0.0405045	UP	2.67751
AT5G44740	2.238	5.12126	4.92355	5.15893	4.92947	4.98952	18.7693	16.7655	16.7732	0	0.00275005	0.0265172	UP	1.79501
AT5G44820	1.213	1.40149	0.702412	1.98521	1.48313	1.0215	3.58644	3.61291	3.07931	0	0.00029452	0.00870453	UP	1.37745
AT5G45030	2.888	5.50639	5.71843	5.28518	4.94788	4.84145	13.2629	11.9443	11.785	0.105908	0.00183171	0.0212618	UP	1.22916
AT5G45110	2.358	22.0426	24.3718	22.0972	16.3287	15.1382	6.42014	8.63458	7.06964	0	0.00124828	0.0175145	DOWN	-1.43902
AT5G45160	2.903	11.8746	11.8554	12.3709	13.1452	12.7051	30.0406	28.7356	26.2627	0	0.00338019	0.0296807	UP	1.19396
AT5G45200	3.786	0.0376603	0.0632153	0.0171904	0.0326844	0.0372354	0.522301	0.435129	0.378672	0	0.00869142	0.0510338	UP	3.5663
AT5G45220	1.641	0.140356	0.0291692	0.134846	0.0522049	0.230592	0.975865	0.988396	1.06169	0	1.06613e-06	0.00127951	UP	3.10251
AT5G45370	1.404	5.52297	4.84803	5.77587	4.79324	4.89886	15.0217	12.7892	12.5511	0	0.00611891	0.0414305	UP	1.38041
AT5G45630	0.515	9.56224	6.22731	10.2363	12.9935	20.1843	0.516152	0.802796	0.611685	0	0.0088056	0.0514436	DOWN	-4.20157
AT5G45830	1.063	17.8601	14.0943	9.51446	14.9093	16.3539	3.04347	3.24912	2.54617	0	0.00104133	0.0158914	DOWN	-2.30371
AT5G45840	2.675	2.80858	4.79203	2.84661	3.50501	3.69734	1.064	1.17226	1.20407	0	0.00254957	0.0254912	DOWN	-1.62205
AT5G45920	0.897	1.99304	2.48672	2.74262	1.8146	3.25074	8.31925	7.01299	7.80502	0	0.000399724	0.0102772	UP	1.64997
AT5G46130	1.369	0.0400578	0.00699294	0.00950808	0.00695302	0.0270987	0.260472	0.21837	0.192539	0	0.00489097	0.0365398	UP	3.62635
AT5G46295	0.41	1.47129	1.14413	1.93661	1.23046	0.669577	0.20557	0.449897	0.454729	0	0.00874553	0.0512262	DOWN	-1.80198
AT5G46490	2.697	14.7128	13.2409	14.2257	9.08015	7.15882	6.47545	4.38405	4.74485	0.046238	0.00976174	0.0546723	DOWN	-1.16751
AT5G46590	1.27	0.0777248	0.00753805	0.0717448	0.142406	0.0993179	0.372667	0.315527	0.420158	0	0.00136456	0.0183419	UP	2.21189
AT5G46710	1.112	48.9075	35.0993	46.9743	35.9262	29.6719	8.96129	12.4181	12.5081	0.00115791	0.000981938	0.0153904	DOWN	-1.79932
AT5G46890	0.621	6.52596	6.68386	7.22012	9.3553	17.9537	20.9197	25.282	26.234	0.0198041	0.00171117	0.0204926	UP	1.3385
AT5G47070	1.754	22.067	21.6628	29.38	15.6782	14.0821	5.68866	8.71412	8.58046	0	0.00669062	0.0436143	DOWN	-1.4252
AT5G47130	0.564	0.369483	0.729882	0.207711	0.455682	0.591992	1.45991	1.22927	1.31086	0	0.000260709	0.00822617	UP	1.50141
AT5G47390	1.621	41.7129	39.2914	41.5711	55.8849	57.4118	22.4738	24.7558	20.191	0	0.00206275	0.0226081	DOWN	-1.06978
AT5G47510	1.188	2.52038	2.82848	2.96927	2.53992	2.2796	5.91035	4.98463	4.87581	0	0.00822063	0.0494356	UP	1.00051
AT5G47635	0.774	0.592318	0.764766	0.533827	0.41212	0.694634	1.76627	1.49875	1.6444	0.0241615	0.000264851	0.00824843	UP	1.44868
AT5G47640	1.046	58.4351	57.1398	50.2796	93.3675	103.65	28.3245	20.1459	15.8034	0.0265635	0.00699262	0.0448093	DOWN	-1.76019
AT5G47920	0.916	3.55616	1.61994	2.77099	1.50678	1.10971	4.83422	4.33994	5.03225	0	0.00269383	0.0262539	UP	1.16441
AT5G48130	2.13	0.0257461	0.0224726	0.0305553	0.0223443	0.0034834	0.179587	0.182159	0.220334	0	0.00261235	0.0258497	UP	3.21327
AT5G48175	0.503	2.42034	1.08485	2.4584	1.41929	0.899797	3.26102	4.4891	3.48926	0	0.00944259	0.0536266	UP	1.17736
AT5G19220	1.732	101.143	136.105	94.5309	123.314	109.947	51.1049	46.4805	41.1602	0.0717768	0.000401456	0.0102981	DOWN	-1.28895
AT5G48290	0.844	1.44245	0.873396	1.12584	1.16164	1.43294	5.58462	4.74032	4.9131	0	0.00136608	0.018355	UP	2.07291
AT5G48380	2.756	31.3395	45.6609	39.4795	34.6382	29.6651	14.5735	15.3223	14.6937	0	0.0017814	0.0208652	DOWN	-1.28252
AT5G48560	1.931	3.83391	3.43569	5.39941	3.9386	4.69155	11.3921	12.9683	11.4762	0	0.000289785	0.00864058	UP	1.4876
AT5G48720	1.315	9.23299	7.20002	10.047	8.0565	8.14185	23.4437	21.4713	23.0121	0	1.82972e-05	0.00238317	UP	1.40745
AT5G48940	3.546	0.801091	0.818026	1.38388	0.797251	0.939486	3.49035	2.70317	2.75759	0	0.00656069	0.0431693	UP	1.65423
AT5G49270	2.15	0.474422	0.289426	0.659909	0.37632	0.514198	1.57712	1.65376	1.32466	0	0.00131895	0.018098	UP	1.71403
AT5G49320	0.932	0.270665	0.667668	0.656414	0.459593	0.310478	1.17563	0.880386	1.19335	0	0.00701466	0.0449163	UP	1.1954
AT5G49680	7.764	0.467588	0.427865	0.638757	0.518599	0.587722	1.27346	1.39026	1.08722	0	0.00633215	0.0423201	UP	1.24339
AT5G49780	2.732	0.132481	0.0876037	0.0859256	0.219501	0.165665	0.437148	0.426059	0.355333	0.0607368	0.000542046	0.0114993	UP	1.55499
AT5G49870	1.961	0.251684	0.13181	0.23232	0.21843	0.185396	0.724049	0.690878	0.567162	0	0.00408639	0.0328908	UP	1.69593
AT5G50120	1.26	0.11316	0.372296	0.402893	0.491044	0.54764	0.972507	1.03486	1.01536	0	0.000793187	0.0137677	UP	1.38644
AT5G50130	1.299	12.8591	15.9555	11.4935	13.5489	12.8116	5.10585	5.69469	5.66676	0	0.000258672	0.00818493	DOWN	-1.28044
AT5G50450	1.275	32.5766	43.0612	36.3136	37.261	35.8761	11.2328	9.88265	9.98879	0	4.95808e-05	0.0039388	DOWN	-1.83607
AT5G50820	0.701	3.01967	1.9529	3.21236	1.67018	1.66174	6.11343	5.21734	4.72311	0	0.00288049	0.0271213	UP	1.21614
AT5G51060	3.174	1.08849	0.763092	1.68551	0.902686	0.876611	3.77686	4.11817	2.99976	0	0.00601488	0.0409572	UP	1.77209
AT5G51330	1.997	0.0274608	0.234899	0.123843	0.128695	0.115177	0.321409	0.334434	0.344464	0	0.0027045	0.0263121	UP	1.40381
AT5G51390	0.498	24.5768	31.5964	21.7471	34.9254	29.3708	7.10495	13.6414	13.2413	0.0241489	0.00199503	0.0222137	DOWN	-1.32804
AT5G48250	1.704	22.2699	16.641	23.9777	20.7249	17.1293	9.32158	9.94305	6.76658	0.00120651	0.000569187	0.0117415	DOWN	-1.2154
AT5G52260	0.872	0.138356	0.0988073	0.194054	0.0327478	0.195701	0.453539	0.401186	0.523456	0	0.00110364	0.0163594	UP	1.79992
AT5G52860	1.792	4.04561	2.28114	4.49623	2.93741	1.91701	8.75184	7.06696	7.10698	0	0.00189377	0.0216456	UP	1.28525
AT5G53130	2.653	46.3383	43.2245	48.1184	45.0314	31.7236	15.9364	14.7274	13.7365	0.0204317	0.000451072	0.010827	DOWN	-1.53494
AT5G53290	1.455	1.15332	1.19091	1.20772	1.04019	1.48393	3.03449	2.74097	3.18574	0	0.000821757	0.0140531	UP	1.29752
AT5G53320	2.079	0.938748	0.67089	1.18214	0.799081	0.71493	2.08293	1.95791	2.07209	0.0203382	5.71412e-05	0.00416524	UP	1.24255
AT5G53700	1.075	0.132634	0.0979597	0.108976	0.11511	0.269177	0.597074	0.633103	0.615981	0	4.25751e-05	0.00364044	UP	2.08772
AT5G53820	0.533	0.637904	0.305341	1.24549	0.125011	0.153126	3.71	3.75909	4.0407	0	1.38416e-05	0.00220443	UP	2.95907
AT5G53970	1.571	37.8743	36.9344	32.5373	33.5002	27.8886	19.8546	14.6687	10.9795	0	0.00431444	0.0339935	DOWN	-1.15376
AT5G53990	1.6	1.13106	0.98725	0.658963	1.05301	0.830072	3.28626	3.43076	2.72828	0	0.0039837	0.0324372	UP	1.75612
AT5G54020	1.671	0.150963	0.280726	0.225901	0.324695	0.359659	0.810907	1.00872	0.927213	0	0.00101953	0.0157085	UP	1.77041
AT5G54030	1.26	0.235025	0.0379894	0.313382	0.143536	0.145334	0.394182	0.34577	0.409885	0.0709688	0.00840872	0.0500561	UP	1.1306
AT5G54040	1.791	0.520528	0.796441	0.821257	0.887561	0.865831	2.19733	1.80768	1.89889	0	0.00208386	0.0227283	UP	1.33826
AT5G54170	1.697	95.7408	75.2592	84.7583	59.0217	44.3994	28.4188	24.8221	23.8982	0.0363049	0.00669371	0.0436091	DOWN	-1.4822
AT5G54400	1.154	1.51116	0.738324	1.09411	0.816595	0.430776	1.94951	2.07795	1.6323	0	0.00509244	0.0373883	UP	1.03891
AT5G54660	0.79	21.7829	21.4128	19.1294	24.4956	19.6573	53.3032	45.9172	46.9475	0	0.00260709	0.025828	UP	1.19404
AT5G54700	1.443	0.0228021	0.00663432	0.00902048	0.00659646	0.00514181	0.0314509	0.0396712	0.0490078	0	0.00946798	0.0536801	UP	1.99594
AT5G54980	0.726	37.058	42.1306	33.7964	34.4168	35.2688	18.7446	13.8339	15.8421	0	0.000105303	0.00545238	DOWN	-1.17858
AT5G55110	0.492	0.2898	0.214038	0.449759	0.444979	1.34217	1.91075	2.93468	2.86166	0	0.00885923	0.0516222	UP	2.22858
AT5G55170	0.54	1.03585	1.75511	2.09711	2.66171	2.26711	5.19871	5.61855	5.34554	0	5.96418e-05	0.00423722	UP	1.4563
AT5G55450	0.74	5.43945	3.35067	9.93832	5.80126	3.31878	14.535	15.8242	15.5597	0	0.000729282	0.0132612	UP	1.45846
AT5G55560	1.242	1.05086	1.28724	1.60349	1.7244	2.21633	3.7637	3.45686	3.51469	0	0.000170599	0.00677639	UP	1.18263
AT5G55700	2.006	25.5984	21.4892	25.5796	33.9722	27.3991	12.7118	13.5043	10.2582	0.0132547	0.000918348	0.0148295	DOWN	-1.14073
AT5G55760	1.729	4.28183	3.90353	3.59103	3.26465	4.19259	8.14828	8.2883	9.58948	0	0.00353938	0.0303566	UP	1.17329
AT5G55970	1.892	43.0076	28.7959	42.2488	50.5567	41.3923	16.5957	15.2527	9.55165	0	0.00059248	0.0119506	DOWN	-1.57798
AT5G56050	1.155	0.731188	0.671376	0.507139	0.370858	0.623121	1.33036	1.27212	1.1188	0	0.00053341	0.0114682	UP	1.09488
AT5G56210	2.004	16.7746	18.7024	16.1798	23.469	23.6103	10.8218	10.1345	8.64569	0	0.00211012	0.022859	DOWN	-1.00092
AT5G56550	0.901	70.4634	41.683	58.2853	63.0599	83.5819	11.288	27.1206	32.7965	0.18331	0.00668965	0.0436164	DOWN	-1.4178
AT5G56810	1.308	1.60157	0.841692	1.80122	1.3463	1.0721	0.36184	0.354989	0.231009	0	0.00334668	0.029502	DOWN	-2.07647
AT5G56970	1.595	0.00687638	0.0780271	0.057126	0.0537105	0.0418663	0.207305	0.227307	0.253933	0	0.000200903	0.00729853	UP	2.27194
AT5G57050	2.081	28.2444	24.0644	22.1238	33.7431	35.4153	11.3747	9.63721	7.19509	0	0.000800938	0.0138593	DOWN	-1.61087
AT5G57090	2.295	2.20312	1.63101	2.83018	2.15259	3.6888	16.4669	16.2438	15.1409	0	3.22631e-06	0.00157126	UP	2.67295
AT5G57220	1.723	6.76657	11.5513	13.3792	10.7893	5.51628	0.982102	1.04472	1.19027	0	0.00454218	0.034944	DOWN	-3.16232
AT5G57270	1.999	9.40962	9.25725	8.56267	8.77586	10.827	18.2761	20.5392	20.2452	0	0.000671508	0.0127129	UP	1.07165
AT5G57340	2.061	38.4379	38.7625	34.1487	53.9947	45.2414	16.9398	16.1068	12.6613	0	0.000754779	0.0134626	DOWN	-1.46692
AT5G57380	2.221	0.0248635	0.00431037	0.00586067	0.00428577	0.00334067	0.0908866	0.0606175	0.0670224	0.00864917	0.0094033	0.0534667	UP	3.09378
AT5G57520	0.72	0.533158	0.704703	0.813535	1.12373	0.917149	0.189098	0.397539	0.18751	0	0.00362497	0.0307688	DOWN	-1.66526
AT5G57560	1.068	653.192	946.209	574.74	457.744	261.306	19.4319	30.0938	89.8184	0	0.00835061	0.0498249	DOWN	-3.63897
AT5G57590	2.67	5.25388	4.87272	5.16275	5.04455	6.15524	10.0456	10.3509	11.6563	0	0.00271114	0.0263462	UP	1.01202
AT5G57620	1.267	0.960875	1.57918	1.83896	2.15617	2.34828	4.44677	4.26217	3.88171	0	0.000175449	0.00683173	UP	1.24012
AT5G57625	0.869	4.15238	1.48723	5.31747	2.59601	1.95523	12.6758	11.7185	9.41775	0	0.00212532	0.0229497	UP	1.86146
AT5G57630	1.611	73.6641	62.9875	80.6604	82.1268	63.2544	22.1813	26.9176	24.3933	0.021532	0.000128741	0.0060422	DOWN	-1.56612
AT5G57640	0.969	9.72277	3.74437	9.20159	7.20041	7.4962	1.3047	1.94954	1.18759	0	0.00383584	0.0317721	DOWN	-2.33551
AT5G57655	2.015	226.754	138.032	208.323	249.418	179.482	73.6531	81.8105	59.5896	0	0.00167458	0.0202784	DOWN	-1.48316
AT5G57660	1.437	313.411	307.659	282.243	408.694	329.629	131.784	153.589	114.294	0	0.000266378	0.00827299	DOWN	-1.3013
AT5G57900	1.126	46.2589	33.1588	54.2154	51.3294	40.9331	24.0275	20.8359	15.4785	0.00213118	0.00145993	0.0189492	DOWN	-1.16746
AT5G57920	0.725	0.408457	0.0396138	0.700201	0.459523	0.378657	2.54864	2.93904	2.34988	0	0.000761478	0.0135033	UP	2.71718
AT5G57980	0.633	0.226797	0.380434	0.719715	0.380673	0.76189	2.58081	2.96016	2.92593	0.0129567	3.88339e-05	0.00347067	UP	2.51458
AT5G58010	1.019	1.60374	1.02404	3.51281	1.74681	1.04122	5.1218	4.91247	4.4605	0	0.00139349	0.0184721	UP	1.43599
AT5G58390	1.22	14.3031	7.79206	13.8168	5.20407	4.14162	20.4864	18.0235	18.6702	0	0.00718277	0.0456362	UP	1.07432
AT5G58430	2.262	55.387	59.5434	59.0579	60.1378	53.443	16.2715	21.4692	19.9149	0	1.24772e-05	0.00215017	DOWN	-1.58141
AT5G58610	3.198	0.0240071	0.116748	0.0773342	0.145846	0.0997637	0.387219	0.483311	0.440255	0	0.000470073	0.0109545	UP	2.23614
AT5G58840	2.294	0.0717164	0.0625981	0.0283709	0.0207469	0.0614529	0.1724	0.196863	0.187767	0	3.38973e-05	0.00321775	UP	1.92262
AT5G58860	1.779	2.29961	2.10409	2.56819	3.77216	5.02567	9.51551	10.4008	8.28642	0	0.000677361	0.0127733	UP	1.57564
AT5G59080	0.848	96.0321	81.921	73.5654	102.65	71.9296	43.1894	45.2669	28.1493	0.00159095	0.00149739	0.019147	DOWN	-1.13258
AT5G59090	2.471	1.4248	2.26645	1.89111	2.77741	4.18875	7.76903	8.74424	8.68205	0	4.91155e-05	0.00391108	UP	1.7426
AT5G59190	2.082	0.163306	0.216113	0.131291	0.0777223	0.138985	0.314515	0.345221	0.336577	0	0.000523603	0.0113737	UP	1.19078
AT5G59240	0.857	0.166373	0.346293	0.288582	0.322103	0.666642	1.27852	1.59572	1.49283	0	0.000356785	0.00963778	UP	2.02368
AT5G59430	2.427	25.1035	25.1384	22.4451	29.0346	39.7395	14.7753	12.1263	9.53876	0	0.00392636	0.0322201	DOWN	-1.21983
AT5G59550	1.535	37.0477	31.0151	50.2092	29.8955	24.347	8.56988	10.4298	8.86648	0	0.00433145	0.0340477	DOWN	-1.89317
AT5G59930	1.971	0.272665	0.101999	0.191517	0.140052	0.229628	0.437488	0.396934	0.486002	0	0.000812723	0.013984	UP	1.2336
AT5G60520	1.232	0.667684	0.318593	1.12727	0.378584	1.62003	4.01527	4.65172	5.58879	0.1	0.00385455	0.0318878	UP	2.53054
AT5G60680	0.832	255.437	203.192	274.114	278.25	294.868	74.5199	122.052	98.6053	0	0.000290216	0.00863809	DOWN	-1.40838
AT5G60730	1.419	0.486944	0.357566	0.266018	0.234781	0.664055	0.900088	0.9458	1.10094	0	0.00114856	0.0166938	UP	1.28939
AT5G52070	1.101	11.5257	15.086	13.3239	15.0864	15.4256	2.87954	3.16009	2.85536	0	9.38837e-05	0.00524065	DOWN	-2.24852
AT5G61540	1.492	5.13841	4.93424	4.94664	5.25059	5.147	14.4485	12.3759	12.0779	0	0.00847605	0.0502965	UP	1.35104
AT5G61550	2.916	0.0714639	0.134604	0.352643	0.212179	0.195923	0.820427	0.874694	0.588657	0	0.00909153	0.0524574	UP	1.97708
AT5G61660	0.716	16.4977	25.7384	10.9986	16.8438	22.2693	35.2511	42.8809	43.8083	0	0.00177288	0.0208235	UP	1.13799
AT5G61750	0.633	0.0173267	0.0151237	0.0205633	0.0150374	0.0820497	0.0921807	0.0904353	0.132032	0	0.00983881	0.0549574	UP	1.80477
AT5G62020	1.472	36.6811	21.7026	37.7675	26.1053	20.1772	11.0949	9.83044	8.11041	0	0.0059757	0.0408145	DOWN	-1.55742
AT5G62030	2.197	11.9563	13.3905	12.9218	12.8721	13.0527	6.41845	5.38785	6.85616	0	0.000615307	0.0122131	DOWN	-1.04532
AT5G62340	0.887	0.531698	0.80947	1.07126	1.14825	1.88209	3.1357	3.40619	2.87744	0	0.000288561	0.00863472	UP	1.52825
AT5G62470	1.749	26.758	25.1184	25.2666	20.1966	17.2276	8.56666	7.85167	7.73015	0	0.00102693	0.0157719	DOWN	-1.50922
AT5G62520	1.729	1.68921	0.859665	2.76591	0.41698	0.937876	5.37862	4.41605	4.74363	0.242351	0.000416252	0.0104699	UP	1.86114
AT5G62720	1.527	105.405	112.629	78.7728	101.489	106.659	42.3691	45.1075	42.6448	0	0.000496937	0.0111924	DOWN	-1.21933
AT5G63020	2.856	17.0118	16.9002	14.7058	16.1396	14.5122	5.847	6.4917	5.79238	0.0258938	8.88823e-06	0.00219618	DOWN	-1.39134
AT5G63090	1.16	2.86487	1.36172	2.56965	2.60123	1.73338	5.72885	4.42502	4.81616	0	0.00396021	0.0323478	UP	1.16448
AT5G63440	1.113	7.30203	7.80145	7.9877	7.92797	8.69957	18.4599	18.3046	18.8247	0	1.94507e-08	0.000653621	UP	1.22195
AT5G63660	0.222	3.40892	1.6818	4.28022	3.38728	4.51194	27.6566	30.9722	27.0768	0	0.000592187	0.0119519	UP	3.04807
AT5G63780	1.691	36.473	36.8433	24.3897	30.3994	28.8296	10.0533	10.021	11.6868	0.0107327	0.000651481	0.0125242	DOWN	-1.56787
AT5G63790	1.317	100.423	58.2405	103.989	70.2051	61.6527	37.0291	31.6625	23.9096	0.0137387	0.00562085	0.039474	DOWN	-1.354
AT5G63990	1.436	3.87235	4.92666	3.90678	4.32849	4.025	8.76339	9.31503	8.55549	0	2.82175e-05	0.00289092	UP	1.07577
AT5G64120	1.288	9.35842	13.1336	7.36729	3.806	15.8474	52.9593	61.0728	63.9549	0	0.000364308	0.00972375	UP	2.58287
AT5G64240	1.627	65.3025	65.2664	76.5548	67.5086	60.4426	26.3893	27.1598	25.6292	0.0117	7.79833e-05	0.00482606	DOWN	-1.34434
AT5G64890	0.584	0.244147	0.147534	0.15602	0.211889	0.44467	0.610592	0.838643	0.627481	0	0.00704725	0.0450649	UP	1.52312
AT5G64905	0.486	0.203108	0.098491	0.455312	0.176272	0.259535	0.600313	0.798349	0.75401	0	0.00196318	0.0220269	UP	1.58884
AT5G65070	1.103	3.351	2.28267	3.3633	2.90825	2.5629	1.00513	0.916898	0.868459	0	0.000607528	0.0121303	DOWN	-1.63732
AT5G65090	1.971	0.328311	0.305997	0.37643	0.294592	0.351961	1.28615	1.31988	1.06007	0.0269976	0.00678902	0.0439912	UP	1.88239
AT5G65230	1.177	0.456604	0.544956	0.409187	0.315403	0.636689	1.47074	1.35643	1.55671	0	5.03786e-05	0.00396469	UP	1.62865
AT5G65320	1.176	0.494298	0.936167	0.896549	0.574683	0.347007	2.47537	2.63403	2.31245	0	1.94963e-05	0.00241754	UP	1.92888
AT5G65450	2.196	5.60877	3.92786	6.123	3.68871	4.20649	19.9668	20.1449	22.6857	0	0.000319295	0.00913933	UP	2.15165
AT5G65510	1.497	1.09165	0.850536	1.74771	0.998286	1.24404	3.80687	3.28441	4.57369	0	0.00949896	0.0537379	UP	1.7125
AT5G65590	1.391	10.1951	7.20581	9.59164	8.25957	7.17427	3.82664	4.31205	4.57096	0	0.00135812	0.0183286	DOWN	-1.00207
AT5G65690	2.176	0.488915	0.277169	0.185438	0.336829	0.542152	1.14115	0.932462	0.806571	0	0.00803597	0.0487967	UP	1.39088
AT5G65730	1.115	71.6597	81.97	59.2691	54.0645	41.3969	15.4961	23.6798	37.011	0	0.00933679	0.0532688	DOWN	-1.28004
AT5G65850	1.297	1.48821	1.8323	1.55885	2.15364	2.22186	0.786184	0.692101	1.15724	0.00564446	0.004092	0.0328965	DOWN	-1.07515
AT5G66052	0.799	105.464	79.618	126.696	102.466	73.0727	41.4563	52.3577	49.4118	0.238712	0.00493245	0.0367029	DOWN	-1.0296
AT5G66070	1.013	27.988	26.3763	35.2976	21.2268	14.2899	7.4946	6.5741	6.16238	0	0.00615115	0.0415902	DOWN	-1.89238
AT5G66210	2.27	32.2609	61.341	44.9845	40.3098	30.9042	13.7865	18.67	18.7855	0	0.00867193	0.0509907	DOWN	-1.29666
AT5G66280	1.589	1.72752	1.83739	2.05413	1.64285	2.31864	6.47662	7.66725	6.73474	0.0242477	0.00238055	0.0245462	UP	1.86081
AT5G66310	3.74	7.56311	7.45133	8.86449	6.65545	5.6044	15.6728	14.6311	13.2412	0	0.000879902	0.0145513	UP	1.00593
AT5G66350	1.669	2.31974	1.84125	2.26951	2.36684	1.93382	4.71201	4.24168	4.09464	0	0.0011721	0.0168972	UP	1.01902
AT5G66390	1.22	5.60078	4.51202	6.26289	7.4199	10.649	17.9887	24.0921	18.5438	0	0.00764227	0.0472687	UP	1.55259
AT5G66650	1.286	17.4922	9.84877	12.3991	8.20858	11.2564	3.92733	3.79362	4.59424	0	0.0074179	0.046376	DOWN	-1.52832
AT5G66675	1.827	32.1951	36.3598	36.3708	34.2246	27.5058	9.59199	9.66104	8.65988	0	8.69068e-05	0.00505262	DOWN	-1.8409
AT5G66985	0.53	3.29035	1.96885	4.05232	1.3829	1.9459	22.227	22.9582	25.2669	0	0.000178727	0.00688753	UP	3.21557
AT5G67480	1.786	93.5827	123.805	124.415	91.1631	51.468	19.069	32.3266	40.2474	0	0.00534141	0.0383368	DOWN	-1.66524
ATCG01040	0.987	0.522277	0.0872948	0.013188	0.0482203	0.11276	0.781684	0.792661	0.670902	0	0.00177337	0.020822	UP	2.25539
ATMG01330	0.384	2.6008	3.15468	2.90466	2.89908	2.17323	0.89114	1.2774	0.795803	0.372055	0.000277742	0.00845402	DOWN	-1.47484
AT1G09486	1.302	1.23611	0.730683	1.02925	1.37493	1.73422	3.81833	4.38567	3.65683	0.0583794	0.000431263	0.0106326	UP	1.69506
AT1G28620	1.627	1.00443	2.3948	1.92808	3.1768	2.15703	5.01695	4.96105	5.70978	0	0.000347216	0.00955598	UP	1.29424
AT1G30935	1.555	0.458462	0.621805	0.64455	0.5448	0.634605	1.38006	1.08396	1.2031	0	0.00876791	0.0513126	UP	1.07346
AT1G33660	0.312	2.00374	1.81034	2.12771	2.53222	2.54455	0.561061	0.795077	0.638772	0	0.000133019	0.00606509	DOWN	-1.72857
AT1G47590	1.173	0.0654516	0.0571298	0.166452	0.170411	0.221387	0.64668	0.851336	0.608364	0	0.00824081	0.0495215	UP	2.36636
AT1G54660	3.037	2.21379	2.81494	2.72161	2.79888	2.983	9.80512	8.50107	9.31634	0	0.00141082	0.0186356	UP	1.76641
AT2G07808	0.389	3.97386	4.31812	2.75422	4.03863	3.76752	2.05367	1.78034	1.09848	0.369038	0.00263747	0.0259606	DOWN	-1.19739
AT2G14490	0.988	0.0333031	0.048448	0.0658733	0.0481715	0.0225293	0.00656212	0.00643787	0.00650701	0	0.00731824	0.0460701	DOWN	-2.74745
AT2G16310	0.975	0.0112491	0.0098188	0.0133503	0.00976276	0.0532692	0.086445	0.0978557	0.0989066	0	0.000330886	0.00930469	UP	2.27609
AT2G21020	1.434	0.282991	0.393882	0.590011	0.258877	0.615716	1.27949	0.980263	1.33151	0	0.0048105	0.03618	UP	1.48285
AT2G31860	2.784	0.0354563	0.0171935	0.0981853	0.0444479	0.0453067	0.132742	0.148506	0.113153	0	0.00268521	0.0262155	UP	1.45005
AT3G24927	0.903	18.4012	22.5286	21.0888	33.0045	21.1907	10.7051	11.9253	9.56152	0	0.00635958	0.0423854	DOWN	-1.11505
AT3G30120	4.481	0.0220287	0.0277736	0.00290483	0.0106212	0.0546414	0.149027	0.109299	0.133428	0	0.00136378	0.0183388	UP	2.4685
AT3G30214	0.867	5.8571	2.72735	6.0804	3.12898	4.88652	13.3182	12.5085	13.3102	0.00111354	7.94597e-05	0.00486369	UP	1.52405
AT3G30875	6.698	0.198135	0.313013	0.312879	0.37944	0.428695	1.79943	1.678	1.51941	0	0.000726781	0.0132301	UP	2.3512
AT4G07320	4.104	0.00267247	0.0303249	0.00317168	0.00231937	0.00903952	0.0363347	0.0387465	0.0328966	0	0.00597509	0.0408187	UP	1.92085
AT4G11500	1.023	0.0536062	0.102939	0.114515	0.0651328	0.00725282	2.13835	1.58549	2.03232	0.00121562	0.00767445	0.0473805	UP	4.80392
AT4G19452	0.579	0.0947135	0.0826712	0.112406	0.147959	0.115331	0.0111975	0.0109855	0.0555175	0	0.00903761	0.0522539	DOWN	-2.09453
AT5G01715	2.17	0.661696	0.752504	0.511234	0.781903	0.48464	1.51418	1.72484	1.38922	0.461197	0.00224103	0.0237039	UP	1.27298
AT5G02244	0.324	0.50777	0.32502	0.522269	0.381923	0.206101	1.86097	1.51163	2.08345	0	0.00729876	0.0459991	UP	2.22647
AT5G28917	0.907	0.0120924	0.0527747	0.100459	0.0314841	0.122706	0.46463	0.385704	0.304789	0	0.00934542	0.0533	UP	2.59105
AT5G33251	1.362	0.00805274	0.00702888	0.00955694	0.00698876	0.0054476	0.128525	0.135432	0.0991245	0	0.0092637	0.0530319	UP	4.02874
AT5G35932	1.801	0.152246	0.00531556	0.108411	0.00528523	0.0205987	0.255591	0.300196	0.260584	0	0.00102882	0.0157864	UP	2.22093
AT5G37072	0.578	1.30931	1.34159	1.82412	0.905758	2.19508	5.46264	4.19273	5.21655	0	0.00305307	0.0280545	UP	1.71007
AT1G35405	4.326	0.00253533	0.00221297	0.00300891	0.00220034	0.00171513	0.0074935	0.00735162	0.00743057	0	1.08737e-05	0.00225555	UP	1.6693
AT1G37603	1.851	0.00592535	0.00517198	0.00703218	0.00514246	0.00400845	0.0175132	0.0171816	0.0173661	0	1.08737e-05	0.00225555	UP	1.6693
AT1G40310	1.923	0.0057035	0.00497833	0.00676888	0.00494992	0.00385836	0.273091	0.234843	0.197247	0	0.0089298	0.0518716	UP	5.48408
AT1G41720	2.07	0.00529847	0.0046248	0.00628819	0.0045984	0.00358436	0.0407169	0.0460914	0.0341634	0.2	0.00848026	0.050286	UP	3.04702
AT1G41850	4.106	0.00267117	0.00233155	0.00317013	0.00231824	0.00180702	0.007895	0.00774552	0.0078287	0	1.08737e-05	0.00213684	UP	1.6693
AT1G42745	2.037	0.0053843	0.00469972	0.00639006	0.0046729	0.0109273	0.206882	0.202965	0.154648	0	0.00819206	0.0493521	UP	4.87444
AT5G61380	2.707	87.2118	57.4364	97.0496	62.5871	48.8567	30.5344	27.1037	23.9891	0	0.00808676	0.04899	DOWN	-1.37616
AT1G43740	2.049	0.00535277	0.0046722	0.00635264	0.00464553	0.0036211	0.0221492	0.0217298	0.0219632	0.333333	8.59313e-07	0.00120318	UP	2.15473
AT1G43745	2.609	0.0210192	0.00366935	0.0049891	0.00364841	0.00284386	0.023324	0.0316934	0.0320338	0.284513	0.00300506	0.0278417	UP	2.00404
AT2G04490	4.484	0.0220139	0.023485	0.026126	0.0191053	0.0115828	0.0506062	0.0666702	0.0559162	0	0.00516792	0.0376627	UP	1.49635
AT2G05950	0.552	1.17229	1.30072	0.872487	0.982908	0.900572	0.434574	0.610711	0.314459	0	0.00381628	0.0317039	DOWN	-1.20623
AT2G06860	2.817	0.0194672	0.00339841	0.00462072	0.00337902	0.00263388	0.0759501	0.074512	0.0524904	0	0.00696451	0.0446974	UP	3.33591
AT2G09920	4.515	0.0024292	0.00212034	0.00288296	0.00210824	0.00164333	0.0129237	0.0154965	0.0128151	0	0.00400888	0.0325318	UP	2.6194
AT2G10600	3.124	0.00351083	0.00306445	0.00416663	0.00304696	0.00237504	0.0103767	0.0101802	0.0102896	0	1.08737e-05	0.00209999	UP	1.6693
AT2G10605	1.258	0.00871846	0.00760996	0.010347	0.00756653	0.0530816	0.128843	0.106179	0.127761	0	0.00012509	0.00597943	UP	2.79163
AT2G10836	0.849	0.0129185	0.011276	0.0153316	0.0112117	0.00873926	0.0687284	0.067427	0.0530065	0	0.00735357	0.0462059	UP	2.40618
AT2G11170	4.278	0.00256377	0.0022378	0.00304267	0.00222503	0.00173437	0.00757758	0.0074341	0.00751394	0	1.08737e-05	0.00225555	UP	1.6693
AT2G11340	5.802	0.0245746	0.00165001	0.00224346	0.00164059	0.00127881	0.0620803	0.0916833	0.0653752	0.0835085	0.00783769	0.0480616	UP	3.54055
AT2G11410	3.985	0.00275228	0.00240234	0.00326639	0.00238863	0.00186189	0.0276581	0.0271344	0.0241992	0	0.00136238	0.0183419	UP	3.37708
AT2G11450	7.604	0.00721188	0.00125899	0.0017118	0.0012518	0.000975754	0.0266747	0.0175661	0.0211367	0.00941972	0.00831242	0.0497118	UP	3.13423
AT2G11550	5.003	0.00219225	0.00191352	0.00260175	0.0019026	0.00148304	0.0198924	0.0216131	0.0167957	0.337224	0.00580622	0.0401961	UP	3.26711
AT2G14180	6.135	0.00178775	0.00156044	0.00212169	0.00155154	0.00120939	0.153234	0.204245	0.158234	0	0.00896539	0.0519974	UP	6.70636
AT2G14330	0.714	0.0153611	0.013408	0.0182305	0.0133315	0.0103916	0.917116	0.971019	0.693316	0	0.00992818	0.0552728	UP	5.92683
AT2G19840	4.028	0.0136145	0.0023767	0.00323152	0.00236313	0.00184201	0.0498969	0.0394775	0.05267	0	0.00182528	0.0212017	UP	3.33701
AT3G13250	4.26	0.0386191	0.00674178	0.0152777	0.00223443	0.0296089	0.0897933	0.0940655	0.0709295	0	0.000940722	0.0150105	UP	2.19902
AT3G23725	4.542	0.00241476	0.00210773	0.00286582	0.0020957	0.00163356	0.0249748	0.0224332	0.0184007	0.0678567	0.00871032	0.0510912	UP	3.3024
AT3G30825	3.527	0.00310968	0.0027143	0.00369055	0.00269881	0.00210367	0.0165439	0.0162307	0.016405	0	9.50428e-08	0.000532303	UP	2.5173
AT3G32966	3.225	0.00340088	0.00296847	0.00403614	0.00295153	0.00230066	0.0502587	0.0493071	0.0458497	0	0.000541533	0.0115102	UP	3.9522
AT3G33080	0.301	0.036438	0.0318051	0.0432444	0.0316236	0.0246499	0.179315	0.164643	0.183226	0.472195	0.000128335	0.00605699	UP	2.38886
AT3G33151	3.085	0.00355521	0.00310319	0.00421931	0.0154274	0.0312659	0.0441332	0.0515447	0.0437626	0	0.00161317	0.0199005	UP	2.0132
AT3G42070	0.693	0.0158266	0.0138143	0.0187829	0.0137355	0.0107065	0.0467776	0.0458919	0.0463848	0	1.08737e-05	0.00225555	UP	1.6693
AT3G42719	0.666	0.082341	0.0143744	0.0195444	0.0714616	0.0111406	0.632762	0.716286	0.762591	0	0.000966607	0.0152425	UP	4.14549
AT4G01525	0.889	0.357781	0.183067	0.483179	0.396166	0.659338	1.58256	1.85309	1.33785	0.142857	0.00520158	0.0377199	UP	1.93576
AT4G04010	2.511	0.0218396	0.00381256	0.00518381	0.0037908	0.00295485	0.0266438	0.0193922	0.024304	0.141548	0.00930441	0.0531653	UP	1.64129
AT4G04293	0.53	0.600126	0.307069	0.613989	0.448995	0.153992	4.26924	4.71646	4.03931	0	0.000553007	0.0116364	UP	3.35328
AT4G05635	4.482	0.00244708	0.00213595	0.00290419	0.00212376	0.00165543	0.00723268	0.00709574	0.00717194	0	1.08737e-05	0.00208799	UP	1.6693
AT4G06474	1.58	0.00694166	0.00605907	0.0411916	0.00602449	0.00469597	0.0533442	0.0523342	0.0447584	0	0.00431423	0.0339999	UP	1.94955
AT4G06506	5.694	0.00963104	0.0016813	0.00228601	0.00835853	0.00130306	0.260244	0.271449	0.224685	0.0165289	0.00284488	0.0269522	UP	5.76015
AT4G06644	5.838	0.0018787	0.00163983	0.00222963	0.00163047	0.00127092	0.00555274	0.0054476	0.00550611	0	1.08737e-05	0.0023423	UP	1.6693
AT4G06670	6.621	0.0115956	0.0014459	0.00196595	0.00143765	0.00112062	0.0127298	0.0144101	0.0126229	0	0.00695162	0.0446317	UP	1.91562
AT4G06694	3.105	0.00353231	0.0030832	0.00419213	0.0030656	0.00238958	0.0104402	0.0102425	0.0103525	0	1.08737e-05	0.00229811	UP	1.6693
AT4G06700	1.47	0.0223833	0.00651247	0.0265644	0.0064753	0.00504737	0.057336	0.0475965	0.0656013	0.142857	0.00170039	0.0204144	UP	2.08516
AT4G07566	2.091	0.00524525	0.00457835	0.00622504	0.00455222	0.00354837	0.0155031	0.0152095	0.0153729	0	1.08737e-05	0.00225555	UP	1.6693
AT4G09425	4.047	0.00271011	0.00236554	0.00321635	0.00235204	0.00183337	0.0272343	0.0235753	0.0270056	0	0.00186562	0.0215141	UP	3.3777
AT5G01335	5.457	0.0663255	0.043858	0.04055	0.0994256	0.0829389	0.398008	0.427771	0.477133	0	0.000760458	0.0134994	UP	2.70469
AT5G10850	0.666	0.938688	0.733093	1.11403	0.61457	0.679576	2.2098	1.97695	2.21055	0	4.27805e-05	0.0036303	UP	1.38587
AT5G19097	4.332	0.0835499	0.214361	0.111176	0.112062	0.176413	0.492389	0.409652	0.36953	0	0.00337134	0.029634	UP	1.60318
AT5G27250	1.047	7.46369	5.69493	7.55203	4.77292	3.79791	2.63491	2.73151	1.86314	0.164111	0.00720289	0.0457467	DOWN	-1.28104
AT5G27895	3.643	1.00857	0.790989	1.19697	0.938021	0.963351	2.34384	2.27851	2.21827	0	3.43952e-06	0.00154109	UP	1.21893
AT5G28145	4.655	0.374626	0.442162	0.310384	0.529611	0.406446	0.213095	0.230923	0.136727	0	0.00338852	0.0296762	DOWN	-1.09196
AT5G28335	4.986	0.063792	0.0940821	0.0600443	0.0973633	0.0997023	0.224955	0.243203	0.284957	0.24	0.00349189	0.0301185	UP	1.59678
AT5G32433	2.775	0.00395237	0.00344985	0.00469065	0.00343016	0.00267374	0.0116818	0.0114606	0.0115837	0	1.08737e-05	0.00213684	UP	1.6693
AT5G32750	5.709	0.00192115	0.00167688	0.00228001	0.00166731	0.00129964	0.00567821	0.00557069	0.00563052	0	1.08737e-05	0.00229811	UP	1.6693
AT5G33255	1.816	0.00603955	0.00527166	0.00716771	0.00524157	0.0204285	0.189218	0.185635	0.145147	0	0.0056084	0.0394608	UP	4.29502
AT5G33395	1.687	1.09873	0.936336	1.0725	1.49523	1.27985	6.7524	7.41632	6.42131	0	0.00109544	0.0162953	UP	2.54437
AT5G34835	0.987	0.0111123	0.00969942	0.013188	0.00964406	0.00751736	0.26932	0.36733	0.319167	0	0.00825965	0.0495549	UP	4.96058
AT5G35052	3.636	0.00904936	0.00263293	0.00357991	0.0026179	0.0020406	0.083806	0.0717231	0.0654209	0	0.00408744	0.0328914	UP	4.20835
AT5G35777	4.575	6.24027	7.3971	6.38736	8.46591	7.22826	0.491745	0.677076	0.625328	0	6.58746e-05	0.00447202	DOWN	-3.57835
AT5G35914	1.254	1.33056	1.34846	1.50644	1.24451	0.887922	0.631195	0.504964	0.405994	0.11631	0.000879927	0.0145446	DOWN	-1.29753
AT5G49080	2.026	1.14226	0.656808	1.31708	0.577887	0.53102	4.96334	4.78773	3.51909	0.173913	0.00907805	0.0523976	UP	2.38811
AT5G50315	1.487	2.78206	2.43695	2.07375	1.89817	2.88271	4.70486	4.848	4.99613	0.131795	5.75752e-05	0.00417874	UP	1.00602
AT1G43590
AT1G68050
AT2G29630
AT3G26740
AT3G27940
AT4G11370
AT4G17140
AT4G27657
AT4G32340
AT5G18130
AT5G19220
AT5G48250
AT5G52070
AT5G61380

## Sheet: BC_p<0.01_multi<0.5_|logFC| >=1
geneID	Length(Kbps)	T-6	T-7	T-8	prp18a-1_4	prp18a-1_5	prp18a-1_6	maxMultiRatio	T-TEST	adjP	regulation	logFC
AT1G01060	3.234	0.20252	0.252685	0.192711	1.0555	0.967797	1.28056	0	0.00881286	0.186256	UP	2.35027
AT1G01660	1.707	0.540857	0.365478	0.398802	2.69172	2.20988	1.97804	0	0.00909023	0.187289	UP	2.39813
AT1G02010	2.46	6.41221	7.4546	6.92604	17.6209	17.2383	16.6792	0	1.59001e-05	0.0593676	UP	1.30956
AT1G02190	2.173	0.0472078	0.101092	0.110309	0.335352	0.278443	0.250863	0	0.00370717	0.15248	UP	1.74135
AT1G02770	1.218	1.1208	0.901778	1.3776	2.8781	3.63679	3.45354	0	0.0026987	0.136783	UP	1.55175
AT1G02930	1.078	26.9303	29.9717	25.6762	14.6797	8.5993	14.6497	0.000624039	0.00585513	0.1686	DOWN	-1.12247
AT1G03190	2.771	4.94645	5.33684	5.37363	12.2272	11.7722	13.9087	0	0.00581748	0.168236	UP	1.27571
AT1G03365	2.836	10.3868	10.0727	9.76728	21.1054	20.6105	19.7925	0	0.000214609	0.0759129	UP	1.02495
AT1G04050	2.675	1.69619	1.02158	0.885331	4.63112	4.90076	3.87191	0	0.0014138	0.113931	UP	1.89533
AT1G04960	1.669	12.2785	15.589	15.9878	45.9555	44.4922	43.1281	0	7.39242e-05	0.0690042	UP	1.60683
AT1G06170	1.699	0.0603782	0.0465464	0.0507904	0.112871	0.109915	0.100565	0	0.000589703	0.103751	UP	1.03578
AT1G06320	0.667	0.130136	0.065869	0.0718748	0.379512	0.436766	0.329351	0	0.00250094	0.133399	UP	2.09648
AT1G06830	0.505	3.64575	3.39164	3.68401	1.44469	1.09256	1.85084	0.0392898	0.00460731	0.157984	DOWN	-1.28883
AT1G07010	1.628	21.3262	33.2307	30.4395	94.9768	101.839	118.698	0.0174707	0.00240146	0.132293	UP	1.89223
AT1G07050	0.833	62.6825	49.0401	55.6524	19.1078	15.0921	14.8952	0	0.00526184	0.162967	DOWN	-1.76943
AT1G07270	1.518	0.452249	0.295213	0.334762	1.40984	1.10719	1.45251	0	0.00548709	0.164339	UP	1.87497
AT1G07290	1.155	1.57819	1.30092	1.2037	3.46013	3.12374	2.65571	0	0.00790524	0.182075	UP	1.17826
AT1G07410	0.755	2.18439	1.66428	1.84142	3.83029	3.57166	4.29978	0	0.00231977	0.131235	UP	1.0402
AT1G08260	6.486	3.99871	2.3821	2.19021	10.2001	9.62625	8.8245	0.0841518	0.00113566	0.110297	UP	1.74104
AT1G08620	4.395	9.78206	9.98736	9.97206	19.969	20.3585	19.8731	0.000564993	1.95548e-05	0.0657119	UP	1.0173
AT1G08760	2.566	9.20407	8.91363	8.44096	20.0497	21.0849	21.4756	0	0.000134314	0.0654128	UP	1.23722
AT1G10240	2.295	6.37122	5.63971	5.13454	13.3394	12.5343	10.788	0	0.00516437	0.162952	UP	1.09645
AT1G10530	0.996	1.2164	0.55708	0.781319	2.14248	2.21741	1.74637	0.00428878	0.00978011	0.190081	UP	1.25708
AT1G11100	4.075	0.619844	0.591327	0.632975	1.50798	1.79561	1.77933	0.0210071	0.0066328	0.171321	UP	1.46271
AT1G12950	1.824	1.43197	0.862313	1.24582	3.04054	2.82985	2.8325	0	0.0039436	0.155541	UP	1.2977
AT1G13300	1.237	6.65342	9.04265	11.3398	24.4013	21.9505	21.8434	0	0.00216421	0.12648	UP	1.33479
AT1G13650	1.293	2.34959	4.39686	4.35283	8.86911	10.3468	8.18652	0	0.00429765	0.157834	UP	1.30384
AT1G15125	1.056	43.5871	36.038	37.5261	18.08	15.2155	7.11146	0	0.00446528	0.158785	DOWN	-1.5357
AT1G17260	2.844	0.685326	0.59012	0.765295	1.84756	1.79391	1.45044	0	0.00729944	0.177105	UP	1.31911
AT1G17665	1.196	17.24	21.9747	21.477	8.33135	9.23735	7.51713	0	0.00974611	0.18986	DOWN	-1.27463
AT1G18300	1.065	28.1185	24.9087	31.4472	7.22418	6.83857	9.78634	0	0.00271369	0.136309	DOWN	-1.82458
AT1G18970	0.81	0.165613	0.141025	0.201232	0.464032	0.41499	0.45201	0	0.000323758	0.0954348	UP	1.39002
AT1G19510	0.589	2.37131	2.64055	1.93715	0.950703	0.519971	0.759746	0	0.00532994	0.164168	DOWN	-1.63949
AT1G20180	1.481	0.0266407	0.0059331	0.0582666	0.170921	0.166444	0.137343	0	0.00349426	0.148823	UP	2.38564
AT1G20400	2.835	0.476495	0.530717	0.510927	1.84502	1.6908	1.57099	0.0013503	0.00328898	0.145809	UP	1.75012
AT1G22760	2.473	0.0861529	0.131466	0.112436	0.238838	0.317158	0.292811	0	0.00625234	0.170262	UP	1.36273
AT1G26290	0.608	0.973392	0.592539	0.709645	1.47611	1.80603	1.4051	0	0.00877355	0.186245	UP	1.04251
AT1G26730	2.253	0.696983	0.503113	0.557497	1.11333	1.39583	1.48423	0	0.00966984	0.189252	UP	1.18401
AT1G26790	1.191	0.00662549	0.00737777	0.00805046	0.0322029	0.0313595	0.0341569	0	0.00012804	0.0796786	UP	2.14762
AT1G26820	1.045	2.22759	1.85829	1.53226	4.66117	4.18167	4.66371	0	0.000654837	0.105288	UP	1.26549
AT1G26970	1.55	0.310548	0.311794	0.278364	0.856153	0.930113	0.887107	0	0.000156961	0.0685001	UP	1.56953
AT1G27360	1.764	4.28098	4.75709	4.28855	9.11009	8.87147	8.95257	0	0.000212597	0.0760011	UP	1.01512
AT1G27720	2.163	0.572761	0.547277	0.483173	1.57812	1.56441	1.86015	0.0630631	0.00453254	0.158	UP	1.64174
AT1G28640	1.238	0.0191219	0.00709768	0.00774483	0.0557647	0.0784392	0.0591483	0	0.00631844	0.170679	UP	2.50914
AT1G29200	2.225	0.370229	0.468466	0.258976	1.139	1.27755	1.25388	0.0284832	0.000562507	0.103292	UP	1.7415
AT1G29720	3.259	0.937037	1.15128	1.30332	0.364825	0.45612	0.601663	0	0.00992518	0.190804	DOWN	-1.25344
AT1G30920	1.203	0.0983911	0.226429	0.294896	0.758785	0.639561	0.737194	0	0.0033081	0.145886	UP	1.78492
AT1G33130	2.004	0.00393761	0.00438469	0.00478448	0.100686	0.0857315	0.0737772	0.184713	0.00876308	0.186141	UP	4.31121
AT1G33280	0.924	0.50386	0.27578	0.425446	1.10412	1.25305	1.41767	0	0.00221921	0.128576	UP	1.64728
AT1G33700	3.482	3.4897	2.39494	3.53326	6.87878	6.58208	6.96225	0.0738838	0.00615713	0.169872	UP	1.11673
AT1G34120	2.01	6.04974	6.41314	5.90073	13.0174	12.3568	11.4028	0	0.00299024	0.140537	UP	1.00195
AT1G34330	1.038	1.49761	0.228562	1.08074	3.64323	2.59789	3.53509	0	0.00998573	0.191203	UP	1.80029
AT1G35130	0.686	0.0115029	0.0128089	0.0139768	0.0559092	0.0544448	0.0593016	0	0.00012804	0.0729262	UP	2.14762
AT1G35210	0.751	1.98587	2.18796	2.82153	0.337063	0.22877	1.09421	0	0.00880262	0.186391	DOWN	-2.07517
AT1G35250	0.686	2.70317	1.83168	3.03297	4.39446	5.45537	5.89458	0	0.00987681	0.190528	UP	1.05689
AT1G35513	0.352	0.784613	1.47281	1.38918	3.29057	3.20438	3.62892	0	0.00241218	0.132449	UP	1.47314
AT1G35910	1.402	0.196993	0.106546	0.198327	0.344691	0.442222	0.446852	0	0.00578442	0.167569	UP	1.29769
AT1G36675	0.807	0.0293344	0.0108884	0.0594058	0.503778	0.620171	0.715823	0	0.00831376	0.183438	UP	4.20682
AT1G36680	1.123	0.175667	0.0704206	0.230524	0.976773	1.25717	1.03604	0	0.00208787	0.127103	UP	2.77839
AT1G37060	5.622	0.00140359	0.00156295	0.00170546	0.0190871	0.0200044	0.0219159	0.384104	0.00178242	0.12299	UP	3.70687
AT1G40091	3.456	0.00228326	0.00254251	0.00277433	0.00665863	0.00648422	0.00706266	0	5.95045e-05	0.0740589	UP	1.41066
AT1G41680	1.206	0.00654309	0.00728601	0.0397516	0.629688	0.576031	0.478996	0	0.00443867	0.158509	UP	4.97465
AT1G42470	3.899	12.056	15.9625	14.7621	29.7799	33.7933	34.4416	0	0.00075078	0.103824	UP	1.19604
AT1G43250	5.315	0.0193006	0.0281049	0.0270595	0.0793774	0.063244	0.0688858	0	0.00272123	0.13628	UP	1.50607
AT1G43590	0.507	3.75093	4.35013	3.53644	1.43732	1.42914	0.657956	0	0.00161802	0.119237	DOWN	-1.72333
AT1G44060	2.523	0.0156381	0.00348273	0.00380028	0.410444	0.464828	0.357953	0	0.00518516	0.162539	UP	5.74962
AT1G47600	1.745	2.54591	1.48547	1.79674	3.84636	4.36203	5.15214	0	0.00768785	0.180786	UP	1.19688
AT1G48510	1.479	0.261432	0.16041	0.136139	1.72708	1.74245	1.88689	0	2.75863e-05	0.0662149	UP	3.26298
AT1G49010	1.161	25.4536	21.4564	25.2131	77.9165	82.1423	71.2915	0	0.00110904	0.109291	UP	1.68154
AT1G50850	2.245	0.00351491	0.003914	0.0298961	0.621938	0.726297	0.722501	0.333333	0.00149605	0.116643	UP	5.79386
AT1G51470	1.713	2.07754	1.22596	0.945936	3.18383	3.95512	4.16546	0	0.00684178	0.173126	UP	1.41154
AT1G51880	2.643	0.158237	0.142958	0.257569	0.467268	0.517207	0.520248	0	0.0049245	0.161604	UP	1.42919
AT1G52450	3.411	0.934887	0.896863	0.919861	2.66676	2.63359	2.38352	0.0329513	0.00260505	0.134885	UP	1.48156
AT1G52920	1.322	0.585422	0.610575	0.664194	0.347479	0.281078	0.292357	0.0152814	0.000583043	0.103119	DOWN	-1.01431
AT1G53920	1.171	12.9719	6.92599	7.49198	23.8507	21.9247	18.2665	0	0.0090274	0.187257	UP	1.22537
AT1G53940	1.311	0.728304	0.891427	0.548518	1.85479	1.93156	1.55773	0	0.00234193	0.131164	UP	1.30141
AT1G53990	1.104	0.664728	0.660611	1.08561	1.81346	1.87422	1.46658	0	0.00875933	0.186179	UP	1.09617
AT1G55690	2.756	12.767	7.72522	8.24173	23.2933	23.7999	22.0498	0	0.00854776	0.185675	UP	1.26683
AT1G56540	3.291	0.390832	0.333748	0.352525	1.02323	0.955574	0.857872	0	0.00321892	0.144998	UP	1.39704
AT1G59850	1.497	0.9761	0.93372	1.53313	3.60938	3.46579	3.21642	0.351717	0.00141488	0.113746	UP	1.57975
AT1G59890	4.199	11.5818	10.2727	10.8805	33.4396	32.304	28.993	0	0.00235329	0.131144	UP	1.53309
AT1G59940	1.051	1.5842	0.610319	0.90316	4.26963	5.30919	4.21905	0	0.00172867	0.121782	UP	2.15519
AT1G60080	1.441	6.93813	6.72587	5.87529	15.9111	15.992	15.5892	0	0.000329159	0.0937379	UP	1.28131
AT1G60095	1.75	0.266038	0.617595	0.356129	1.5999	1.83117	1.5575	0	0.000941104	0.107203	UP	2.00856
AT1G60260	1.543	23.274	21.4292	23.1593	44.2198	48.3965	44.6778	0	0.000809482	0.105433	UP	1.01658
AT1G60270	1.57	5.22211	2.41221	2.69322	9.2	10.4625	12.5774	0	0.00550703	0.164642	UP	1.64235
AT1G60680	1.304	9.30689	7.0472	7.68285	23.0063	22.0701	19.9973	0.00180354	0.000379457	0.0980868	UP	1.43682
AT1G61450	0.498	5.72016	4.11115	4.06243	11.1056	10.6947	8.38125	0	0.0089386	0.186567	UP	1.11924
AT1G61480	2.605	0.481637	0.340683	0.423275	0.89811	0.931936	0.727728	0	0.00695902	0.173738	UP	1.03805
AT1G62130	3.157	4.68159	4.51732	5.21469	13.5119	12.3014	11.5742	0	0.00228177	0.130181	UP	1.37512
AT1G63295	0.748	2.98548	2.45517	1.34592	7.55793	7.7794	8.38636	0	0.00194339	0.126316	UP	1.80557
AT1G63420	1.87	9.06828	6.26362	5.92206	18.4057	18.5707	15.7024	0	0.00157239	0.11768	UP	1.30949
AT1G64210	1.764	0.55022	0.413444	0.70117	1.39587	1.70654	1.70196	0	0.0016444	0.119607	UP	1.52897
AT1G64480	0.645	0.84415	1.23971	1.50139	3.34183	3.62489	2.98957	0	0.00132491	0.113868	UP	1.47354
AT1G64920	1.359	0.214839	0.174575	0.204603	0.434619	0.489194	0.544807	0	0.00592486	0.168585	UP	1.30589
AT1G64930	1.536	0.262043	0.394725	0.368293	0.913897	0.792696	0.895192	0.000147488	0.0007043	0.103351	UP	1.34379
AT1G65950	1.837	9.97002	10.5759	10.1727	23.1124	21.6206	19.8643	0	0.00546273	0.164342	UP	1.07236
AT1G66050	2.05	1.1277	0.996447	0.771783	1.91745	2.0074	2.26823	0.333925	0.00175029	0.12279	UP	1.09663
AT1G66783	0.091	10.319	7.04885	4.95209	20.4834	21.917	26.3755	0	0.00296629	0.140393	UP	1.62357
AT1G67110	1.735	0.677668	0.491257	0.491839	1.52531	2.03644	1.92736	0	0.00738114	0.177295	UP	1.72472
AT1G68050	2.113	66.0518	59.1275	70.9919	27.9494	26.9274	23.1379	0.000102609	0.00286211	0.138188	DOWN	-1.3303
AT1G69120	1.228	0.00642587	0.00715548	0.0078079	0.0812049	0.0912438	0.0861322	0	0.00111891	0.10962	UP	3.59566
AT1G69710	3.501	0.21863	0.218355	0.0848989	0.812866	0.672092	0.755287	0	0.000716391	0.102441	UP	2.10185
AT1G70250	2.41	5.14386	5.4581	4.73835	12.13	12.5933	13.1158	0	5.6822e-05	0.0867931	UP	1.30255
AT1G70260	1.463	0.663423	0.0780793	0.0327686	1.43138	2.27209	2.23008	0	0.00893116	0.18676	UP	2.93799
AT1G71200	0.705	4.17494	2.4055	3.35923	13.5462	16.2217	12.8679	0	0.00266946	0.136329	UP	2.10079
AT1G71400	2.763	3.00159	2.3629	2.1411	6.06052	5.37189	5.26805	0	0.00103126	0.10932	UP	1.15385
AT1G73066	1.931	0.690613	0.659816	0.819283	2.20469	1.79106	1.84971	0	0.00547451	0.164108	UP	1.42981
AT1G73540	0.946	64.7876	64.6758	82.1475	11.0034	11.1416	17.6055	0	0.00500011	0.162342	DOWN	-2.41237
AT1G73810	1.452	1.25538	0.732244	0.891455	2.24522	1.84688	1.9668	0	0.00670545	0.171354	UP	1.07345
AT1G76420	1.104	0.207281	0.183061	0.147643	0.382147	0.439799	0.361117	0	0.00250564	0.133438	UP	1.13689
AT1G76960	0.388	41.1022	40.9226	46.5319	18.6826	14.5739	19.2291	0	0.000541871	0.101726	DOWN	-1.29241
AT1G77100	1.011	0.00780511	0.00869132	0.00948378	0.0379364	0.0369427	0.0402383	0	0.00012804	0.0782299	UP	2.14762
AT1G77235	0.309	0.127685	0.483423	0.155147	1.71288	1.95811	1.50085	0	0.00119824	0.109418	UP	2.75478
AT1G78478	0.101	7.57845	9.48292	5.79083	13.8985	18.5636	16.0307	0	0.00873211	0.186189	UP	1.08544
AT1G78540	2.478	4.91991	5.16648	5.08038	12.7072	12.0367	11.6264	0	0.00125874	0.111606	UP	1.26185
AT1G79580	1.662	0.403569	0.237913	0.305758	0.927689	0.804512	0.99377	0	0.00138739	0.113712	UP	1.52497
AT2G01760	1.405	9.57534	9.2122	8.46892	29.0178	31.5432	26.1921	0.00111854	0.00451891	0.158511	UP	1.67032
AT2G02130	0.533	63.0833	76.0819	51.8261	135.468	141.142	119.356	0	0.00207965	0.126832	UP	1.05187
AT2G02610	2.108	0.246259	0.366339	0.455228	0.634977	0.79301	0.81439	0.394457	0.00924333	0.187455	UP	1.07035
AT2G04395	0.477	0.0496287	0.0552637	0.0201008	0.241218	0.17226	0.221741	0	0.00500772	0.162275	UP	2.3454
AT2G05270	0.415	0.133101	0.19056	0.0231038	0.35119	0.449989	0.450921	0	0.00990723	0.190677	UP	1.85232
AT2G05660	6.579	0.00119942	0.0013356	0.00437214	0.0268167	0.0238435	0.0185504	0	0.0060384	0.169661	UP	3.32483
AT2G06460	1.043	0.00756564	0.00842466	0.00919281	0.0367725	0.0358093	0.0390038	0	0.00012804	0.0741835	UP	2.14762
AT2G06890	4.177	0.00188915	0.0273474	0.00688635	0.14875	0.137701	0.111028	0	0.00150373	0.1167	UP	3.45989
AT2G07070	1.517	0.0364118	0.0173769	0.120088	0.267996	0.310217	0.33789	0	0.00469038	0.15809	UP	2.39744
AT2G10250	4.913	0.00160614	0.0017885	0.00195158	0.0640139	0.047133	0.0612739	0	0.00868691	0.186051	UP	5.01127
AT2G10640	2.42	0.0338152	0.00363096	0.00396202	0.331909	0.294966	0.390341	0.218084	0.00343595	0.148028	UP	4.61857
AT2G11115	0.516	0.0152926	0.0170289	0.0185816	0.252718	0.304004	0.268053	0	0.00335083	0.145856	UP	4.01818
AT2G13110	3.108	0.00253892	0.0028272	0.00308497	0.0123403	0.0120171	0.0130891	0	0.00012804	0.0661945	UP	2.14762
AT2G13860	3.811	0.0103529	0.00230567	0.0025159	0.038243	0.0372413	0.0362937	0	0.00504966	0.162537	UP	2.88092
AT2G14475	1.036	0.00761676	0.00848159	0.00925492	0.0222126	0.0216308	0.0235604	0	5.95045e-05	0.066653	UP	1.41066
AT2G14570	1.308	0.00603285	0.00671783	0.00733035	0.0527803	0.0628196	0.0684236	0	0.00665005	0.171109	UP	3.19598
AT2G15800	1.917	0.104655	0.0325136	0.0456516	0.527845	0.565434	0.730104	0.0293694	0.00699887	0.174344	UP	3.31812
AT2G15940	1.881	0.00419509	0.0513855	0.0968495	0.248759	0.29784	0.203296	0	0.00647527	0.170529	UP	2.29854
AT2G16000	4.365	0.00180778	0.00201304	0.00219659	0.015816	0.0154017	0.0167756	0	0.000388883	0.0960883	UP	2.99562
AT2G16310	0.975	0.0242799	0.00901223	0.0295018	0.149481	0.11492	0.125172	0	0.00195097	0.126321	UP	2.6332
AT2G16970	1.341	0.370716	0.268653	0.293148	0.680699	0.729714	0.66133	0	0.00101193	0.108642	UP	1.15164
AT2G16980	1.737	1.32197	0.95609	1.17574	2.29195	2.87698	2.5528	0	0.00385521	0.153678	UP	1.16074
AT2G17050	4.068	0.215314	0.218161	0.0966352	0.808935	0.743677	0.622014	0	0.00183622	0.124655	UP	2.0364
AT2G18000	0.824	1.88655	1.07704	2.17594	3.97501	4.32416	3.58427	0	0.00721735	0.176644	UP	1.20924
AT2G18600	0.846	2.62099	2.08767	2.52736	5.66692	5.78337	5.51068	0	0.000496283	0.103584	UP	1.22895
AT2G20750	1.141	1.61139	1.16286	1.52099	3.71772	3.73818	3.77217	0	0.0031517	0.142543	UP	1.3863
AT2G22600	1.899	0.220232	0.106424	0.146422	0.416054	0.350086	0.338472	0	0.00883611	0.186046	UP	1.22339
AT2G22610	3.402	3.90373	2.16186	2.43225	9.05742	8.0198	7.44281	0.000989648	0.00187643	0.125608	UP	1.52879
AT2G22620	2.444	1.41095	1.08938	1.07101	2.28804	2.8471	2.2302	0.00137704	0.00986247	0.19069	UP	1.04429
AT2G23010	1.507	4.27798	2.78126	2.44951	6.12336	7.53922	7.93102	0	0.00687172	0.173101	UP	1.18327
AT2G23630	1.647	0.943849	0.197399	0.646192	2.01665	1.64635	2.16866	0	0.00934524	0.188046	UP	1.70601
AT2G23910	1.258	9.20194	8.02558	8.7116	3.72561	3.14113	4.79246	0	0.00200695	0.127008	DOWN	-1.15366
AT2G24030	1.766	0.647899	0.621951	0.656942	5.17319	4.70776	4.25238	0	0.00419288	0.156727	UP	2.87483
AT2G24160	2.605	1.34798	0.907364	1.07107	2.48821	2.44024	1.95831	0	0.0061779	0.169748	UP	1.04986
AT2G24610	2.398	0.937833	0.589948	1.02758	2.1464	2.25216	2.10699	0	0.00586527	0.168459	UP	1.34814
AT2G24750	6.985	0.634649	0.770494	0.590319	1.42596	1.32189	1.47784	0.422238	0.000540491	0.102037	UP	1.08247
AT2G25040	0.303	0.0260428	0.0289997	0.0316439	0.0759479	0.0739586	0.0805563	0	5.95045e-05	0.0689514	UP	1.41066
AT2G26170	1.816	8.57068	6.8583	6.26166	16.4112	14.0098	14.1856	0.064941	0.00189921	0.126128	UP	1.04018
AT2G26330	3.191	45.7013	35.58	39.7977	92.5657	95.6048	80.1762	0	0.00196999	0.126335	UP	1.14815
AT2G26480	1.471	0.241396	0.17323	0.228133	0.610113	0.716006	0.779879	0	0.00430848	0.157887	UP	1.71216
AT2G27035	0.746	0.475996	0.435813	0.52696	1.03853	0.851119	1.05792	0	0.00887401	0.18626	UP	1.03469
AT2G27100	2.501	24.4743	25.883	26.8934	57.161	56.8158	52.6786	8.99945e-05	0.000416459	0.098554	UP	1.10925
AT2G28240	2.252	4.64277	4.38956	4.52582	12.5927	12.7936	10.8061	0	0.00637393	0.170805	UP	1.41652
AT2G28960	2.787	0.331268	0.734608	0.498843	2.58444	2.57035	2.16323	0	0.000515896	0.103809	UP	2.22555
AT2G29210	2.922	22.8924	23.2664	24.469	60.6177	57.1025	54.0547	0	0.00194596	0.12624	UP	1.28221
AT2G29630	2.639	182.88	183.214	193.473	96.8071	94.5206	72.2576	0.000239578	0.00205573	0.126987	DOWN	-1.08604
AT2G30130	0.732	0.89474	0.612204	0.510841	1.49852	1.9695	2.07851	0	0.00806533	0.182265	UP	1.45881
AT2G30230	0.815	25.0865	27.5467	29.9172	15.8027	12.7308	12.389	0	0.00180386	0.123961	DOWN	-1.01239
AT2G30480	3.474	3.70017	3.73583	3.91638	11.5017	11.1531	10.9583	0	6.80997e-05	0.0673066	UP	1.56603
AT2G31220	1.697	0.0790491	0.0466012	0.0508503	0.149166	0.127652	0.139039	0	0.00497848	0.16274	UP	1.23641
AT2G31650	3.365	2.88202	2.21175	2.36782	16.2054	14.782	12.6818	0.00240964	0.0055915	0.16584	UP	2.54906
AT2G32030	0.868	3.55457	3.87718	4.65045	0.892563	0.49053	1.54662	0	0.00245044	0.1326	DOWN	-2.04405
AT2G32210	0.583	3.42438	3.60219	3.38082	1.09206	0.679075	0.795476	0.00278298	0.000270398	0.0849201	DOWN	-2.01967
AT2G32610	2.274	0.142273	0.142971	0.0548132	0.657781	0.824505	0.812187	0	0.00153592	0.117037	UP	2.75431
AT2G33175	0.522	0.0755839	0.218831	0.128576	2.48344	2.27529	2.22888	0	0.000128712	0.0645557	UP	4.0461
AT2G33640	2.11	1.35007	0.903679	0.831574	4.96235	4.65536	3.87529	0	0.00259955	0.135016	UP	2.12872
AT2G34010	1.221	0.290822	0.352628	0.588949	3.63748	4.11727	3.40507	0	0.00117231	0.109734	UP	3.17877
AT2G34060	1.198	8.97778	10.1292	9.09989	20.1373	19.0362	18.4117	0	0.000175618	0.069429	UP	1.02965
AT2G34390	1.119	1.0869	0.575147	1.01965	2.12487	2.4558	2.06222	0.0187697	0.00356955	0.149939	UP	1.30867
AT2G34880	2.421	0.00325938	0.00362946	0.00396039	0.0158421	0.0154271	0.0168034	0	0.00012804	0.0672288	UP	2.14762
AT2G35075	1.548	0.525045	0.403018	0.427376	1.11493	1.20154	1.04593	0	0.000400744	0.0975842	UP	1.31073
AT2G35210	1.535	0.663149	0.566714	0.693341	1.75403	1.59129	1.59543	0	0.000204228	0.0745964	UP	1.36122
AT2G35660	1.563	10.1348	13.2617	13.1261	30.7082	33.9378	40.2735	0.0521329	0.00839198	0.184558	UP	1.52242
AT2G37370	2.339	0.11133	0.123971	0.151671	0.25908	0.277843	0.260887	0	0.0021237	0.127437	UP	1.04381
AT2G37900	1.728	0.43382	0.127126	0.24969	0.705815	0.981279	0.842811	0	0.0089417	0.186169	UP	1.64196
AT2G38320	1.538	2.52942	2.1196	2.17571	6.41888	7.6301	6.60734	0	0.00330626	0.145997	UP	1.59774
AT2G38740	1.165	15.2197	19.7838	21.1432	36.5364	42.0682	46.1004	0	0.00398084	0.155368	UP	1.15125
AT2G39130	2.067	17.977	22.0745	19.864	47.3998	42.9495	38.2322	0.00169917	0.00561171	0.165854	UP	1.10168
AT2G40350	0.474	3.21299	2.72506	2.8117	1.11663	0.803715	0.497783	0	0.000947435	0.107559	DOWN	-1.85535
AT2G40550	2.031	6.18922	4.08845	3.46984	15.3679	12.7292	13.0556	0	0.00144887	0.115101	UP	1.58182
AT2G40711	0.567	2.88083	2.52605	2.28288	7.61662	5.83621	7.16042	0	0.00941224	0.188043	UP	1.42256
AT2G40860	2.23	8.92776	10.0912	10.3835	19.5827	19.7666	20.4353	0	0.000183258	0.0699794	UP	1.02384
AT2G42980	1.584	0.602782	0.63794	0.757703	1.50701	1.24164	1.55635	0.0014188	0.00662479	0.17151	UP	1.10715
AT2G43137	0.077	1.33224	1.41949	0.926063	2.96458	3.23614	2.44999	0.378594	0.00607296	0.169498	UP	1.23398
AT2G44195	0.721	0.0328334	0.0121871	0.0132983	0.22342	0.238288	0.214407	0	2.90259e-05	0.0650257	UP	3.53523
AT2G45135	1.183	0.687041	0.363955	0.559238	1.00504	1.35758	1.20358	0	0.00945727	0.18816	UP	1.14711
AT2G45350	1.842	1.91491	1.82703	2.06649	0.845364	1.08301	0.958497	0.00023698	0.000576562	0.104166	DOWN	-1.00864
AT2G47190	1.138	3.21047	2.47856	2.83936	1.34137	1.09619	0.664908	0	0.00339027	0.147002	DOWN	-1.45886
AT2G47750	2.155	1.23399	1.48827	1.58838	2.98643	3.44894	2.97131	0	0.00153144	0.11696	UP	1.12578
AT2G48130	0.765	3.5793	3.77895	5.65259	10.6588	11.8443	9.90168	0	0.00191383	0.12561	UP	1.31649
AT3G01345	1.612	0.259442	1.30278	0.196282	6.42876	4.41609	4.67881	0	0.0067984	0.172548	UP	3.14205
AT3G01990	1.617	0.92232	0.592316	0.687153	1.77692	1.59375	1.6051	0.0251201	0.00282232	0.137451	UP	1.17624
AT3G02270	2.031	0.00388526	0.0043264	0.00472088	0.0188841	0.0183895	0.02003	0	0.00012804	0.075485	UP	2.14762
AT3G02380	1.315	8.01077	8.7529	7.59353	16.8091	19.193	17.5398	0.0141431	0.00137006	0.113398	UP	1.13632
AT3G02410	1.34	0.429881	0.295083	0.279057	1.05902	1.36575	1.25686	0	0.0029211	0.138841	UP	1.87456
AT3G02830	1.695	35.777	40.8657	36.6837	102.634	101.1	111.943	0	0.000532623	0.102864	UP	1.47797
AT3G04700	1.073	0.43045	0.251304	0.248422	0.936091	0.851135	0.83486	0.430517	0.00359969	0.150266	UP	1.49514
AT3G05650	2.894	1.22427	0.64065	0.520156	3.11442	2.69729	2.18446	0	0.00639523	0.170425	UP	1.74527
AT3G06650	2.203	43.2158	46.0479	45.2066	94.8098	103.245	100.858	0.000177352	0.000835138	0.104327	UP	1.15244
AT3G07120	1.264	0.0954596	0.0918977	0.165503	0.293556	0.239672	0.323126	0.0393352	0.00802632	0.182364	UP	1.27911
AT3G07650	1.965	48.0325	45.6965	54.7912	16.7351	14.1756	14.4795	0	0.00362412	0.150352	DOWN	-1.71021
AT3G08490	1.067	0.347587	0.189409	0.296539	0.754853	0.595065	0.739653	0	0.00382623	0.153433	UP	1.32589
AT3G08800	3.097	2.96835	3.02733	2.76467	6.1896	6.16737	5.77703	0	0.000159927	0.0671775	UP	1.04964
AT3G09600	1.424	1.46847	2.2029	1.93243	8.08552	9.4894	9.34176	0	0.000904187	0.108904	UP	2.26402
AT3G10450	1.615	26.028	29.9517	25.8196	69.9201	61.9741	60.9735	0	0.00163261	0.119266	UP	1.23745
AT3G10915	1.579	16.4566	18.5032	19.1944	51.82	51.0304	45.5348	0	0.00124947	0.111668	UP	1.4542
AT3G12203	1.339	0.347697	0.374051	0.565691	2.29721	2.33746	1.68314	0	0.00984725	0.190615	UP	2.29492
AT3G12320	1.218	5.86315	12.6321	9.07642	18.736	23.2006	25.0031	0	0.00832929	0.183539	UP	1.27967
AT3G13260	0.819	0.144523	0.0536442	0.0819496	0.384005	0.264499	0.3477	0	0.00704271	0.174659	UP	1.83041
AT3G13280	1.152	0.143846	0.190688	0.124845	0.72579	0.758654	0.642702	0	0.000590731	0.102855	UP	2.21116
AT3G13290	4.566	8.97455	7.50333	7.6121	18.9013	17.8009	15.1195	0	0.00688847	0.173134	UP	1.10512
AT3G13600	1.818	0.238726	0.265831	0.174041	0.594925	0.55469	0.747383	0	0.00975419	0.189907	UP	1.48309
AT3G14170	1.799	1.24132	1.16736	1.5616	3.4836	3.83249	3.72211	0	0.000141725	0.0661461	UP	1.47519
AT3G14225	1.134	0.0626267	0.178218	0.110071	0.588714	0.679909	0.553367	0.00212787	0.000670408	0.102869	UP	2.37632
AT3G14400	2.712	19.7303	20.2793	18.5151	48.1147	50.4075	42.886	0	0.00455481	0.157957	UP	1.27275
AT3G14450	0.984	5.62151	8.3448	7.02543	18.9156	19.8562	16.0101	0.00272999	0.00217751	0.127037	UP	1.38388
AT3G14452	0.117	1.82099	2.96733	2.86823	8.88467	10.109	8.46418	0.0225047	0.000643864	0.104524	UP	1.84245
AT3G14510	0.964	0.176508	0.0455753	0.248654	0.551891	0.509667	0.673192	0.0273854	0.00602512	0.169571	UP	1.88173
AT3G14517	2.299	0.106403	0.0191103	0.0668572	0.210203	0.250185	0.316362	0.334698	0.00904057	0.187184	UP	2.01357
AT3G14520	2.031	0.00388526	0.0043264	0.0141626	0.0717597	0.0625244	0.092138	0	0.00883236	0.1862	UP	3.3391
AT3G14590	2.744	6.47124	5.53969	7.70325	17.0479	17.4088	13.9806	0.0155851	0.00373561	0.152344	UP	1.29688
AT3G14700	0.979	1.05589	0.619303	0.91082	1.91964	1.89988	2.18572	0	0.00282197	0.137633	UP	1.21549
AT3G16320	2.352	1.33194	1.31879	1.50426	4.70616	5.1355	4.2376	0	0.00433457	0.158153	UP	1.76066
AT3G16650	1.724	1.89035	1.78899	1.59616	0.832035	0.654259	0.863644	0	0.00116194	0.109988	DOWN	-1.16669
AT3G16730	2.579	4.37231	3.45821	3.42405	9.44938	9.68847	9.51167	0	0.00187811	0.125471	UP	1.348
AT3G17340	3.591	7.06913	6.33999	5.86607	13.2203	13.8892	11.6888	0	0.00283733	0.137783	UP	1.00925
AT3G17660	1.045	2.99781	2.91776	3.31225	7.74414	7.05523	7.85589	0	0.000655008	0.104814	UP	1.29578
AT3G17675	0.39	0.0609945	0.0225306	0.0245849	0.181373	0.173083	0.191083	0.0269388	0.00281331	0.13741	UP	2.33518
AT3G18880	0.568	0.680735	0.479568	0.75962	1.25595	1.40717	1.21756	0	0.00440631	0.157857	UP	1.01526
AT3G19470	1.433	3.21035	3.37864	3.41906	10.6148	10.2013	8.49956	0	0.00943324	0.188239	UP	1.55051
AT3G20075	0.338	0.957188	0.961882	0.765913	2.01981	1.74591	1.85351	0	0.000825235	0.104253	UP	1.06546
AT3G20840	2.137	0.491108	0.152137	0.0583272	3.04748	3.71569	2.70698	0	0.00398683	0.155241	UP	3.75472
AT3G21680	0.36	1.29324	0.805468	1.51812	2.40776	2.3032	2.87026	0	0.00915943	0.187222	UP	1.06771
AT3G21710	1.227	8.32828	7.41195	10.2758	24.6877	23.5175	18.5733	0	0.00889047	0.186489	UP	1.35998
AT3G22490	0.998	0.00790678	0.00880453	0.00960731	0.0385121	0.0375563	0.0409018	0.00440064	0.000131639	0.0650527	UP	2.15199
AT3G23110	2.508	0.663873	0.297802	0.317309	1.54455	1.14668	1.17112	0	0.00809464	0.182436	UP	1.59448
AT3G23260	1.089	1.61587	1.75093	2.31558	3.79663	3.61487	4.28102	0	0.00242174	0.132326	UP	1.04102
AT3G26740	0.712	3324.72	3815.81	4004.74	1553.53	1609.3	1489.57	0	0.00730712	0.177163	DOWN	-1.26039
AT3G26922	1.603	3.60769	2.2634	1.65683	8.69492	9.07468	6.77112	0.0192111	0.00399729	0.155109	UP	1.70485
AT3G27327	4.075	0.00193643	0.0021563	0.00235291	0.0207063	0.0164978	0.0179695	0	0.00536047	0.16346	UP	3.09758
AT3G27580	2.483	8.49478	9.68579	7.08585	20.2627	16.2182	16.6689	0	0.00655975	0.170879	UP	1.07284
AT3G27630	0.303	1.74487	2.11698	1.2974	4.02524	4.65939	4.59171	0	0.00107676	0.10998	UP	1.36363
AT3G27710	1.86	0.156971	0.108656	0.128872	0.482514	0.44578	0.424306	0	0.000165079	0.0676503	UP	1.77764
AT3G27940	0.74	3.10307	2.7192	2.96713	1.275	1.4233	0.868593	0	0.00168848	0.120211	DOWN	-1.30109
AT3G28330	1.05	0.0976976	0.0753165	0.155236	0.533299	0.633156	0.503669	0	0.00151714	0.116663	UP	2.34709
AT3G28340	1.606	4.38769	5.25793	5.39107	2.10635	1.3628	1.69715	0	0.00169349	0.120313	DOWN	-1.54128
AT3G28540	1.68	1.03804	1.03037	0.941688	2.39711	2.38768	2.74596	0	0.00392397	0.155131	UP	1.32298
AT3G28880	2.498	0.754498	0.728003	0.532841	2.31155	2.14256	1.85185	0.0555527	0.00247774	0.132583	UP	1.64569
AT3G29410	2.031	1.30933	1.04266	1.42098	2.85151	3.02691	3.0726	0	0.000596114	0.102727	UP	1.24635
AT3G29730	2.579	0.0030597	0.0034071	0.00371776	0.477089	0.595094	0.582326	0.207667	0.00462015	0.158101	UP	7.34388
AT3G30830	1.986	0.00397329	0.00442443	0.00482784	0.019312	0.0188062	0.0204838	0	0.00012804	0.0717107	UP	2.14762
AT3G30841	1.722	6.02591	4.58737	4.40429	14.0096	12.5408	10.3805	0	0.00923267	0.187578	UP	1.29818
AT3G30875	6.698	0.382885	0.255815	0.293455	1.23799	1.27917	1.04101	0	0.00183816	0.124535	UP	1.9325
AT3G31425	1.815	0.00434764	0.00484128	0.0052827	0.0126789	0.0123468	0.0134482	0	5.95045e-05	0.071414	UP	1.41066
AT3G32360	5.185	0.00152188	0.00508404	0.0018492	0.0754499	0.0907616	0.0737513	0	0.00360116	0.150141	UP	4.82684
AT3G33067	1.73	0.00456125	0.00507915	0.00554225	0.0310377	0.0371563	0.032921	0.21108	0.0033106	0.145805	UP	2.7355
AT3G42436	1.208	0.00653225	0.00727394	0.00793717	0.0317497	0.0309181	0.0336763	0	0.00012804	0.0693975	UP	2.14762
AT3G42860	1.459	3.61827	3.34252	2.6221	6.16709	6.71209	6.5636	0	0.00201982	0.126631	UP	1.0207
AT3G44480	4.038	26.25	26.0957	28.1757	61.2433	65.4222	63.983	0.0496268	9.65958e-05	0.0737729	UP	1.24347
AT3G44670	4.149	28.5996	28.3617	30.8873	61.6821	61.9686	53.4146	0.0286903	0.00555709	0.165403	UP	1.01119
AT3G45070	1.067	1.82668	0.7494	1.30297	3.86053	3.46538	4.50655	0	0.00365879	0.151044	UP	1.60897
AT3G46183	4.578	0.00172367	0.00191938	0.00209439	0.0284846	0.0212118	0.0266585	0.142857	0.00838173	0.184453	UP	3.73424
AT3G46540	1.213	28.4088	29.8813	34.3923	86.5535	90.8264	79.088	0	0.000742111	0.103477	UP	1.46841
AT3G46620	1.371	59.7492	61.0726	69.4805	18.0998	16.8412	27.6013	0	0.000775301	0.104631	DOWN	-1.60539
AT3G47050	1.953	0.125253	0.175469	0.132554	0.506669	0.501048	0.387437	0	0.00719741	0.176413	UP	1.68707
AT3G47260	2.463	0.0224266	0.0178378	0.00389285	0.16157	0.17721	0.186649	0.373158	0.000101888	0.0744313	UP	3.57277
AT3G47400	2.054	1.17942	0.825646	0.835574	2.13989	2.21476	2.35688	0	0.00200946	0.126928	UP	1.24043
AT3G47660	2.865	0.0743651	0.0644068	0.090359	0.190157	0.179901	0.190339	0.000365024	0.00130085	0.113248	UP	1.29028
AT3G47790	2.96	1.39425	1.29726	2.19943	3.15381	3.92418	3.54309	0	0.0072911	0.177158	UP	1.11875
AT3G47980	1.097	2.09323	1.2896	1.02261	4.76187	5.08656	3.7158	0	0.00517644	0.163026	UP	1.62245
AT3G48240	0.988	0.455248	0.684811	0.824887	1.79346	2.39669	2.47874	0	0.00790833	0.182022	UP	1.76296
AT3G48340	1.22	10.006	4.91924	9.58024	17.5358	19.3174	24.1885	0	0.00992933	0.190775	UP	1.31669
AT3G48700	1.229	0.738373	0.493326	0.460291	1.40433	1.72006	1.89999	0	0.00537358	0.163711	UP	1.57022
AT3G51130	1.571	27.9524	29.2692	30.6807	90.4229	82.3677	78.1322	9.24919e-05	0.00311903	0.142407	UP	1.51327
AT3G51400	1.106	18.5614	21.0619	21.2675	10.0563	8.46507	8.1799	0.121658	0.000806135	0.105406	DOWN	-1.18932
AT3G51480	3.338	4.86271	3.58269	2.94996	9.49765	9.10079	8.10388	0.000525278	0.00257549	0.135229	UP	1.22852
AT3G52030	1.485	17.5921	18.4224	19.0386	49.8056	49.0976	41.5135	0.0698381	0.00742283	0.177535	UP	1.35082
AT3G53100	1.491	12.0859	9.52065	9.16869	24.6221	26.3227	24.6267	0.0390636	0.000470133	0.102587	UP	1.29607
AT3G53680	2.526	2.35854	1.70799	1.75744	4.38805	4.66938	4.01656	0	0.00106301	0.109575	UP	1.16662
AT3G54500	2.769	28.4316	46.7775	41.2576	90.3833	92.0465	75.2058	0.0071077	0.00351415	0.148915	UP	1.14541
AT3G54530	1.306	0.00604209	0.0605531	0.0367079	0.264306	0.223065	0.305263	0	0.00227013	0.129958	UP	2.93977
AT3G54730	1.451	0.244723	0.42996	0.270925	0.794546	0.857387	0.644537	0.136364	0.00639784	0.170359	UP	1.2801
AT3G54770	1.004	2.06706	0.936455	2.03413	6.59347	6.9267	5.97248	0	0.000710189	0.103762	UP	1.95211
AT3G54870	3.497	0.471607	0.314088	0.381111	0.901537	0.805297	0.821296	0	0.00213142	0.126769	UP	1.11551
AT3G54930	1.924	3.05549	3.05533	3.07477	6.86938	7.34947	6.14443	0	0.00870393	0.186179	UP	1.14852
AT3G56570	1.596	3.8021	2.43898	2.22881	6.76236	7.61491	6.30605	0	0.00350441	0.148877	UP	1.28805
AT3G57680	1.56	2.99958	2.14604	2.95633	6.13167	6.23922	5.51279	0	0.000970146	0.10795	UP	1.1423
AT3G57740	1.074	1.46211	1.34995	1.75871	0.507097	0.772021	0.719681	0	0.00649293	0.170327	DOWN	-1.1933
AT3G57920	1.377	1.9885	1.32091	0.970136	5.95114	4.95834	4.84851	0.0043691	0.00127774	0.112696	UP	1.88055
AT3G58930	1.808	5.93132	5.88549	5.3933	12.8595	11.6716	11.3718	0	0.00215309	0.126269	UP	1.06084
AT3G59100	5.766	5.07315	3.93629	3.33072	20.2039	18.3429	18.0009	0	0.000113558	0.0763203	UP	2.19611
AT3G59750	1.881	0.524386	0.210213	0.24977	1.12961	0.806153	1.01648	0	0.00873909	0.186102	UP	1.58454
AT3G59800	0.905	16.8021	20.3216	19.6318	52.6781	51.843	45.3918	0	0.00154428	0.117142	UP	1.40129
AT3G60176	1.01	0.0234385	0.00869992	0.0284795	0.0531635	0.0665628	0.0563894	0	0.00828452	0.183395	UP	1.53871
AT3G60270	0.564	0.0419732	0.0778983	0.0510005	0.122405	0.145688	0.129833	0	0.00676336	0.17244	UP	1.21958
AT3G61940	1.313	0.0420691	0.00669225	0.0219073	0.111001	0.0967151	0.0929496	0	0.00665105	0.171004	UP	2.08902
AT3G62150	4.143	4.84665	5.90634	5.51543	2.84568	2.56922	2.65668	0.0053633	0.00894034	0.186256	DOWN	-1.01115
AT4G00020	3.959	2.36988	1.78476	1.49912	5.89595	5.2909	5.43394	0.00140949	0.000543145	0.101399	UP	1.55571
AT4G00050	1.489	12.2154	18.583	13.5547	41.7641	38.8541	52.1557	0	0.00812872	0.182348	UP	1.58187
AT4G01240	1.98	0.147457	0.1642	0.101692	0.437775	0.456489	0.398591	0	0.000331532	0.09284	UP	1.64513
AT4G01270	1.614	1.59873	0.84385	0.695048	7.44737	8.66851	7.3145	0	0.000465896	0.102327	UP	2.90064
AT4G01700	0.966	3.62894	2.81559	2.87581	7.09914	6.48624	5.75918	0.0840043	0.0032762	0.145434	UP	1.05347
AT4G02314	2.391	0.00330028	0.003675	0.00401008	0.109746	0.0908953	0.0931749	0.14574	0.0039115	0.155003	UP	4.74126
AT4G02830	0.926	1.5424	1.33797	2.0398	4.41523	5.28373	4.3844	0	0.00167974	0.120098	UP	1.51721
AT4G03060	1.267	4.1043	2.30943	1.47567	6.54465	7.64669	9.20217	0	0.00913046	0.187314	UP	1.56812
AT4G03190	2.061	20.1948	17.5775	17.5646	41.7713	45.185	36.7677	0.0028053	0.00607108	0.169728	UP	1.16081
AT4G04395	1.248	0.00632289	0.0070408	0.00768277	0.178246	0.221461	0.189062	0	0.00464355	0.158741	UP	4.80605
AT4G06558	2.136	0.00369427	0.00411373	0.00448881	0.0179559	0.0174855	0.0190454	0	0.00012804	0.0768329	UP	2.14762
AT4G06607	1.38	0.00571809	0.00636734	0.0347395	0.106604	0.135323	0.159186	0.119841	0.00494784	0.162212	UP	3.09866
AT4G06615	1.04	0.00758746	0.00844897	0.00921932	0.730195	0.94091	0.711916	0.0153846	0.00862503	0.185911	UP	6.56004
AT4G06718	1.119	0.035259	0.00785248	0.11139	0.802034	1.04804	0.8507	0	0.00312624	0.14235	UP	4.12768
AT4G07586	2.025	0.0116903	0.00433922	0.00473486	0.0643963	0.0848424	0.060268	0	0.00911113	0.18726	UP	3.33481
AT4G07810	6.098	0.00129402	0.00144095	0.00157233	0.00628955	0.00612481	0.00667119	0	0.00012804	0.0651916	UP	2.14762
AT4G08020	2.259	0.00349312	0.00388974	0.0127332	0.0848909	0.076054	0.0612285	0	0.00420062	0.156668	UP	3.46527
AT4G08091	2.559	0.0154181	0.00343373	0.00374681	0.326733	0.452451	0.39743	0	0.00824303	0.1832	UP	5.70226
AT4G08115	2.867	0.988091	0.848963	0.892927	2.34109	2.56637	2.03476	0	0.00827554	0.183317	UP	1.3465
AT4G09060	1.303	2.07721	1.54429	1.27302	5.2924	4.83274	4.22732	0	0.00165	0.119755	UP	1.55206
AT4G09940	1.185	0.0199771	0.00741513	0.00809122	0.0582588	0.0819474	0.0617938	0	0.00631844	0.170679	UP	2.50914
AT4G10420	0.969	2.98863	2.27608	2.28571	5.66004	5.29594	5.66762	0	0.0014415	0.114787	UP	1.13861
AT4G10640	1.487	0.52855	0.220927	0.31752	0.905526	1.05298	0.813961	0.0145487	0.00906724	0.187159	UP	1.37761
AT4G11110	3.964	17.0659	18.3696	17.2146	69.1121	65.8547	57.3535	0	0.00512189	0.162834	UP	1.869
AT4G11210	0.555	0.952603	0.649124	0.984724	3.69025	4.18579	4.44192	0	0.00112411	0.109491	UP	2.25172
AT4G11370	0.713	4.88067	5.70595	5.7421	1.9903	2.18961	3.38913	0	0.00779949	0.181883	DOWN	-1.10923
AT4G11890	1.618	1.19486	1.36311	1.04888	0.175412	0.0969507	0.497826	0	0.00450302	0.158284	DOWN	-2.22746
AT4G12440	0.7	0.439639	0.338924	0.205459	0.821865	0.800338	1.01121	0	0.00448814	0.15859	UP	1.42017
AT4G12500	0.778	0.983835	1.27625	1.09684	0.207051	0.278438	0.449686	0	0.00214279	0.126327	DOWN	-1.84383
AT4G13250	1.937	214.93	188.272	218.031	77.3291	91.5005	110.609	0.000252887	0.00108104	0.10975	DOWN	-1.1526
AT4G13410	1.614	0.855588	0.876515	0.421781	2.41909	2.29093	2.23317	0	0.00408075	0.155652	UP	1.68866
AT4G13670	1.353	54.5019	72.7698	67.9104	133.838	135.268	128.201	0	0.00264788	0.136262	UP	1.02543
AT4G15280	1.437	0.236125	0.201787	0.313598	0.496436	0.639379	0.56053	0	0.00464364	0.158582	UP	1.17457
AT4G15430	2.588	0.698234	0.573798	0.403826	1.57386	1.67119	1.77625	0	0.00078594	0.10439	UP	1.58316
AT4G16270	1.18	0.421773	0.260629	0.349397	0.72157	0.909565	0.89649	0.238095	0.00355428	0.14986	UP	1.29262
AT4G16570	2.464	3.91025	4.10461	3.54495	9.8904	8.58848	8.17911	0	0.00614836	0.170049	UP	1.20545
AT4G16690	1.152	18.7205	32.3026	32.6511	72.1063	60.1671	67.9498	0	0.00321671	0.145093	UP	1.25875
AT4G16845	1.9	15.296	16.9033	16.9709	42.831	41.6934	35.2125	0	0.00751016	0.178733	UP	1.28401
AT4G16910	2.085	1.04988	0.889228	0.639206	2.49353	2.12235	2.20792	0.00236053	0.00100728	0.108489	UP	1.40415
AT4G17140	13.366	14.5191	14.6385	15.0335	7.09971	7.04341	7.19084	0	0.000171643	0.0686653	DOWN	-1.05061
AT4G17483	0.934	1.20815	1.28887	0.913641	3.52328	3.71892	3.07502	0	0.00130428	0.113253	UP	1.59693
AT4G19230	1.995	3.59543	2.14498	4.06112	6.34807	7.9416	6.68431	0	0.00841854	0.184658	UP	1.09752
AT4G20230	1.958	0.664969	0.381455	0.396648	2.55822	3.26185	3.00432	0	0.00232627	0.131161	UP	2.61235
AT4G21270	2.849	3.89147	2.12502	2.23801	9.31851	9.10065	9.03291	0	0.00685764	0.173006	UP	1.73366
AT4G22570	0.907	22.2635	22.5244	21.5759	48.181	54.1336	45.4173	0	0.00826626	0.183353	UP	1.15452
AT4G23515	0.996	0.641735	0.573444	0.375438	1.22455	1.25247	1.29885	0	0.00815971	0.182556	UP	1.24722
AT4G27657	0.473	7.95769	7.82092	10.0341	3.4867	2.47941	4.66153	0	0.00633997	0.170575	DOWN	-1.28026
AT4G29190	1.436	93.7739	98.8774	112.887	57.9205	52.9702	36.7205	0	0.00373221	0.152761	DOWN	-1.04955
AT4G29230	1.497	1.37578	1.28546	1.46672	4.11463	5.03477	4.59257	0	0.0053411	0.163761	UP	1.73509
AT4G29610	0.882	1.33305	1.30509	1.66324	0.600092	0.431928	0.267516	0	0.00291943	0.138958	DOWN	-1.7268
AT4G29760	0.843	0.0842452	0.0938106	0.0796165	0.282079	0.239247	0.241287	0	0.00396471	0.155461	UP	1.56541
AT4G30050	0.748	0.0105494	0.0117472	0.0128183	0.051275	0.049932	0.0543863	0	0.00012804	0.0682959	UP	2.14762
AT4G30510	1.316	7.2134	9.76844	10.4842	21.4909	20.4739	20.9278	0	0.00414256	0.156588	UP	1.19524
AT4G30520	2.407	5.05848	4.35513	4.36981	11.3484	10.9394	11.2054	0	0.000139049	0.0667514	UP	1.28093
AT4G32340	0.96	276.373	314.984	302.514	138.369	118.264	80.2855	0	0.0015163	0.116866	DOWN	-1.40767
AT4G32730	3.552	10.4924	9.12583	9.52601	32.5898	31.2021	33.4312	0	3.56253e-05	0.063008	UP	1.73809
AT4G34065	0.15	0.0526064	0.0585795	0.0639206	0.153415	0.149396	0.162724	0	5.95045e-05	0.0769073	UP	1.41066
AT4G34140	2	17.8454	21.1194	23.0738	53.5609	52.9498	51.6526	0	0.000768915	0.105035	UP	1.35018
AT4G35770	0.97	625.753	911.059	850.978	217.177	202.663	68.1343	0	0.00701916	0.174204	DOWN	-2.2908
AT4G36410	0.631	27.3301	34.2103	28.3631	17.2171	8.93978	12.6954	0.00570002	0.00630189	0.170506	DOWN	-1.21038
AT4G37750	2.148	11.9136	6.14021	5.70019	24.1585	23.0111	20.064	0	0.00637806	0.170644	UP	1.50101
AT4G38730	1.464	5.92361	6.64421	6.69988	15.462	16.5775	13.5881	0	0.00625348	0.170156	UP	1.24372
AT4G38760	6.023	13.2311	12.5625	11.8836	33.4479	34.1692	29.4418	0	0.00346656	0.148585	UP	1.36517
AT4G39110	2.637	0.565564	0.383199	0.490858	1.30609	1.24922	1.11383	0	0.000689091	0.102917	UP	1.34975
AT5G01270	2.998	13.7842	13.749	13.6785	39.4974	40.2568	44.6079	0	0.00327351	0.145699	UP	1.59342
AT5G01510	1.861	6.58499	7.35155	7.74364	21.5201	21.5987	17.8681	0	0.00567849	0.166364	UP	1.49212
AT5G01580	0.702	3.00214	2.46849	2.33488	5.78441	5.93946	7.09267	0.0236539	0.00452863	0.158191	UP	1.26944
AT5G01630	3.734	2.40436	1.37566	1.23589	5.14325	4.73361	4.36713	0.00614158	0.00409586	0.156051	UP	1.50577
AT5G02350	1.956	0.455869	0.435752	0.632344	1.42356	1.35572	1.52657	0	0.000411138	0.0979849	UP	1.49847
AT5G02360	1.029	0.513795	0.401346	0.30749	1.17037	1.38653	1.52603	0	0.00324475	0.145382	UP	1.73961
AT5G02950	2.229	1.78777	1.78577	1.91418	4.38082	4.78216	4.48603	0	0.000691748	0.102403	UP	1.31452
AT5G03250	2.162	1.65625	0.957684	1.31174	3.33098	3.1389	2.86131	0.00385121	0.00291432	0.138912	UP	1.24912
AT5G03495	1.29	1.79229	1.45086	1.41963	4.9176	4.73089	3.96718	0	0.00401763	0.155361	UP	1.546
AT5G03995	0.455	2.70894	2.05948	1.57329	5.61144	5.05514	4.87403	0.100735	0.00253593	0.133989	UP	1.2931
AT5G04380	1.158	0.72913	0.811918	1.10122	13.0562	11.4886	11.6281	0	0.00129465	0.113296	UP	3.77506
AT5G05400	2.625	0.964952	1.0879	1.28207	2.94264	2.80865	2.66247	0	0.000178012	0.0695573	UP	1.3351
AT5G06220	3.141	30.8108	36.3554	36.4113	77.5354	76.3206	70.1539	0.137963	0.000215278	0.0753562	UP	1.11285
AT5G06530	2.97	8.30278	7.29877	7.82221	20.9124	22.407	18.39	0	0.00586233	0.168518	UP	1.39752
AT5G06839	2.009	1.79501	2.17377	2.43878	6.02892	7.52931	5.96545	0	0.00732901	0.176928	UP	1.60738
AT5G06920	1.062	0.0371514	0.0413697	0.0451417	0.00722292	0.00703373	0.00766119	0	0.00439016	0.157952	DOWN	-2.49623
AT5G07050	1.357	0.00581501	0.00647526	0.00706566	0.0282636	0.0275233	0.0299786	0	0.00012804	0.0717107	UP	2.14762
AT5G07390	3.16	0.114456	0.160501	0.218536	0.485772	0.452949	0.473091	0.0368989	0.0055903	0.165951	UP	1.51644
AT5G07550	0.65	0.0606997	0.0675917	0.0147509	0.247824	0.218349	0.287896	0	0.00168746	0.120394	UP	2.39825
AT5G10140	1.065	1.78565	1.44386	2.02565	9.83151	10.3596	7.87644	0	0.00738729	0.177189	UP	2.41709
AT5G10330	1.698	12.2079	12.7442	12.0232	32.9999	30.7224	27.731	0.240976	0.00615842	0.169768	UP	1.30647
AT5G11100	1.709	2.0547	1.11572	1.66628	4.3493	4.62001	4.55607	0	0.00531184	0.164062	UP	1.48358
AT5G11920	1.917	0.119373	0.0687553	0.105034	0.348124	0.416938	0.428667	0	0.00134484	0.114411	UP	2.02571
AT5G12280	1.632	0.7978	0.66225	1.00464	2.45821	2.15581	2.05897	0	0.000992638	0.108301	UP	1.43693
AT5G12920	2.068	1.03407	0.735076	0.551733	2.09573	1.74464	1.78225	0	0.0042163	0.156557	UP	1.27657
AT5G14250	1.674	20.0291	23.2796	20.7055	48.0452	45.8051	40.122	0	0.00428949	0.157707	UP	1.06547
AT5G15120	1.189	2.23655	1.76625	2.05632	4.25149	5.18301	4.24943	0	0.0066403	0.17112	UP	1.1753
AT5G16190	1.445	0.573392	0.504716	0.338403	1.17317	0.997699	1.0867	0	0.00288936	0.138706	UP	1.20146
AT5G16770	1.538	1.57511	1.19406	2.05103	2.92765	3.34636	3.46502	0	0.00794586	0.181889	UP	1.01468
AT5G16900	2.601	0.191131	0.361477	0.313337	0.651762	0.571509	0.697566	0	0.00647733	0.17045	UP	1.14939
AT5G18065	0.946	5.93073	4.282	3.29401	18.3498	17.0006	12.9783	0	0.00852729	0.185831	UP	1.8392
AT5G18130	2.02	63.6629	59.3204	67.7005	28.5982	28.0932	35.5696	0	0.000657609	0.103263	DOWN	-1.04739
AT5G18180	0.57	0.706034	0.416223	0.487984	1.19911	1.48165	1.21329	0.00118257	0.00389215	0.154783	UP	1.274
AT5G18680	1.474	35.9269	38.8258	39.3997	81.5628	82.9738	70.6216	0.000253211	0.00609626	0.169585	UP	1.04267
AT5G19220	1.732	109.031	128.714	123.101	54.9455	56.3921	49.6734	0.0737639	0.00384901	0.153796	DOWN	-1.16422
AT5G19390	3.441	18.4168	19.4763	19.1233	41.5147	42.6633	39.8202	0	0.000386861	0.0970154	UP	1.12087
AT5G20240	1.095	0.71343	0.698139	0.604181	2.79509	3.18576	2.84581	0	0.00159519	0.118595	UP	2.13055
AT5G20470	1.671	0.0330561	0.0683603	0.0286897	0.169849	0.147519	0.131464	0	0.00334406	0.14613	UP	1.78649
AT5G20490	5.208	13.7834	14.9671	15.2714	42.4409	42.8726	48.5781	0	0.00298479	0.140478	UP	1.60477
AT5G22370	1.195	14.1245	15.8606	15.6378	30.8434	32.786	28.7932	0	0.00149508	0.117111	UP	1.01849
AT5G23000	1.304	1.1074	0.680582	0.904399	2.05298	2.33146	1.96541	0	0.00189395	0.126278	UP	1.23784
AT5G23480	1.835	0.563333	0.512371	0.412785	0.940554	0.948484	1.12177	0	0.00309706	0.142177	UP	1.0163
AT5G23610	2.108	23.0103	25.6813	26.4946	62.1264	60.8535	52.2484	0	0.00456442	0.157801	UP	1.22069
AT5G25340	1.326	0.134095	0.116575	0.107106	0.0221877	0.0536643	0.0387534	0.296285	0.00272129	0.136081	DOWN	-1.64238
AT5G25470	1.246	0.386937	0.232965	0.331172	0.943248	0.894848	0.974174	0.00178481	0.0011975	0.109648	UP	1.5641
AT5G26140	0.432	0.0182661	0.142381	0.155363	0.72801	0.985602	0.734517	0	0.00505164	0.16229	UP	2.95364
AT5G26170	0.522	6.93861	4.3598	5.41856	16.2673	15.3546	12.329	0	0.00524995	0.162899	UP	1.39458
AT5G26620	0.225	3.61231	3.55382	4.13354	1.32959	1.16197	1.19331	0	0.00313094	0.142178	DOWN	-1.61659
AT5G27280	0.813	78.6112	94.7643	99.1945	47.1344	44.9473	39.2202	0.0521835	0.00972024	0.189576	DOWN	-1.05374
AT5G27895	3.643	0.911912	0.730837	0.513225	2.35197	2.4749	1.90507	0	0.00310328	0.142074	UP	1.64268
AT5G28526	6.467	0.00122019	0.00501763	0.00148262	0.0249088	0.0288767	0.0352666	0.257299	0.00575216	0.167355	UP	3.5279
AT5G28917	0.907	0.0435003	0.0096879	0.0739985	0.296004	0.304723	0.242202	0	0.000911896	0.108664	UP	2.72846
AT5G28923	2.268	0.00347926	0.0038743	0.0211378	0.272129	0.312003	0.258067	0.069602	0.00140612	0.11441	UP	4.88557
AT5G29000	1.989	11.2473	11.3404	13.0011	27.0539	27.1114	24.0404	0	0.000933909	0.108218	UP	1.13585
AT5G32035	0.612	0.0128937	0.0430732	0.0156668	0.112805	0.158673	0.11965	0	0.0053134	0.163959	UP	2.44893
AT5G33389	1.905	0.0207112	0.00461256	0.00503312	0.0523463	0.0745022	0.0726064	0	0.00403852	0.155275	UP	2.71597
AT5G33390	0.762	1.0252	1.2108	1.01921	4.17763	5.28377	4.64467	0	0.00616874	0.169774	UP	2.1155
AT5G34728	2.178	0.00362303	0.0040344	0.00440225	0.0316973	0.030867	0.0336206	0	0.000388883	0.0968001	UP	2.99562
AT5G34866	1.626	0.00485299	0.0270201	0.00589674	0.0613282	0.0780978	0.0850647	0	0.00351157	0.148993	UP	2.57135
AT5G34940	2.449	3.70866	4.13692	3.35525	7.97143	7.0428	7.46509	0	0.000499581	0.103629	UP	1.00499
AT5G35057	6.135	0.0064311	0.00143226	0.00156285	0.0412607	0.0426151	0.0384595	0	9.14357e-05	0.0731573	UP	3.69802
AT5G36870	5.616	0.0295068	0.0297278	0.0256092	0.0614643	0.0651747	0.0536038	0	0.00546433	0.164096	UP	1.08706
AT5G37820	0.852	0.0277851	0.0515665	0.0562682	0.117042	0.0964414	0.124144	0	0.00518066	0.162854	UP	1.31586
AT5G38350	2.502	0.312232	0.516258	0.325735	1.00866	1.41216	1.22596	0	0.00723854	0.176648	UP	1.6597
AT5G38540	1.488	0.079546	0.114606	0.228821	0.524189	0.54357	0.404865	0.0221458	0.00503271	0.162458	UP	1.79975
AT5G38550	2.074	0.391885	0.42618	0.649479	0.999769	1.14432	1.12963	0.0159887	0.00628113	0.170356	UP	1.15753
AT5G39130	0.836	0.0885976	0.12169	0.134963	0.702012	0.811993	0.892548	0.0712915	0.00433175	0.158222	UP	2.80125
AT5G40010	1.545	0.209404	0.142183	0.0806765	0.461734	0.420631	0.437089	0	0.00982262	0.190577	UP	1.60996
AT5G41590	0.801	0.403907	0.274249	0.442896	0.909763	0.848631	0.843075	0	0.00454753	0.158194	UP	1.21447
AT5G42900	1.102	79.905	85.3097	101.441	21.7941	17.6036	17.4315	0	0.00637832	0.170515	DOWN	-2.23027
AT5G44560	0.999	9.51161	6.21857	6.50783	20.9661	20.7425	16.8506	0.155807	0.00251338	0.133639	UP	1.39687
AT5G45030	2.888	6.05777	5.09851	5.5558	13.6098	13.8066	16.0606	0.109109	0.00382524	0.153576	UP	1.37936
AT5G45160	2.903	12.376	12.3964	12.8381	34.554	32.2903	28.8144	0.000116781	0.00699579	0.174396	UP	1.34676
AT5G46871	0.237	7.6246	8.49032	7.32256	1.78013	2.48994	2.6434	0	0.00034744	0.0941561	DOWN	-1.76133
AT5G46910	2.394	3.08848	2.5289	2.39903	5.68096	5.75058	6.32474	0	0.000384312	0.0985834	UP	1.1473
AT5G48250	1.704	41.8368	35.2763	42.3836	19.1739	16.8343	15.0005	0.000837564	0.00290738	0.138975	DOWN	-1.22816
AT5G48510	0.675	0.0584516	0.0130177	0.0142046	0.375014	0.27666	0.397769	0	0.00641726	0.170068	UP	3.61463
AT5G48720	1.315	9.0071	7.66434	7.99859	20.5156	24.0341	18.8401	0	0.00990556	0.190754	UP	1.36149
AT5G48780	2.279	0.73758	0.79811	0.971852	1.80772	1.78645	1.61026	0.000145992	0.000712802	0.102803	UP	1.05346
AT5G50120	1.26	0.319396	0.369609	0.175021	0.553998	0.741054	0.716759	0	0.00986249	0.19058	UP	1.21935
AT5G50340	2.083	13.9977	16.5403	13.9886	41.2629	43.0797	38.3217	0	0.00029549	0.0902696	UP	1.46198
AT5G51930	1.749	0.0857223	0.0351678	0.0274102	0.214904	0.277609	0.265159	0	0.00156858	0.11792	UP	2.35305
AT5G52070	1.101	10.8725	9.37751	11.0337	3.14215	2.93772	3.09633	0	0.00461759	0.158175	DOWN	-1.76944
AT5G52290	4.785	0.196243	0.159762	0.142269	0.396063	0.426178	0.501725	0.000258494	0.00457112	0.157708	UP	1.40985
AT5G54040	1.791	0.806279	0.868389	0.540702	1.57184	1.44725	1.41282	0	0.0079616	0.181877	UP	1.00038
AT5G55560	1.242	1.97592	1.30884	1.84505	3.7242	3.49434	4.42184	0	0.00438006	0.158437	UP	1.18216
AT5G55760	1.729	5.02484	3.98944	3.599	9.87125	8.73135	8.18324	0	0.00213578	0.12658	UP	1.08653
AT5G56320	1.203	1.55458	1.05911	1.25131	2.58242	2.78799	2.72559	0	0.00438784	0.158207	UP	1.06674
AT5G56740	1.704	11.9244	10.9579	10.0439	24.8444	24.2462	24.5184	0	0.000656047	0.104483	UP	1.16065
AT5G56850	1.82	28.698	35.2684	32.942	108.583	113.02	111.202	0	1.5789e-05	0.0663218	UP	1.77999
AT5G56990	0.883	2.38606	1.92058	2.226	6.48929	5.67639	5.20605	0	0.00548718	0.164195	UP	1.411
AT5G58280	0.822	0.700779	0.224483	0.244951	1.78237	1.93561	1.29664	0	0.00744616	0.17784	UP	2.09937
AT5G58570	0.593	11.7229	9.70436	12.1207	6.47982	4.38233	5.8276	0.231791	0.00492302	0.161714	DOWN	-1.00726
AT5G58670	1.961	1.62165	1.02611	1.05122	2.96112	3.07402	2.89185	0	0.00845539	0.184984	UP	1.27104
AT5G58750	1.335	0.762498	0.506811	0.553021	1.40774	1.13586	1.34689	0	0.00378694	0.152952	UP	1.09417
AT5G58760	2.007	6.76649	5.31944	4.81077	13.9617	13.0824	15.4332	0	0.000783303	0.104869	UP	1.32995
AT5G59320	0.681	22.6996	17.7416	14.009	99.1789	120.274	135.161	0	0.00788235	0.182047	UP	2.70324
AT5G59370	1.755	0.139385	0.105143	0.103803	0.284101	0.293685	0.310612	0	0.000465042	0.102811	UP	1.35075
AT5G59570	1.451	8.38041	9.34405	10.2621	5.30238	3.75293	3.58306	0	0.00267603	0.136251	DOWN	-1.14692
AT5G60100	2.222	32.5049	28.6267	29.4072	18.6728	14.9027	10.9886	0	0.00842398	0.184657	DOWN	-1.02266
AT5G60260	0.369	0.962313	1.3097	1.53306	2.30746	2.69237	2.80026	0	0.00412036	0.156276	UP	1.03557
AT5G60530	1.707	2.04786	0.869941	1.91537	4.10274	3.92527	4.94272	0	0.00553817	0.165133	UP	1.42422
AT5G60890	1.357	25.1499	18.0724	17.4875	37.0988	45.3529	40.4171	0	0.00382499	0.15375	UP	1.01712
AT5G61070	2.175	0.388199	0.206038	0.268908	0.722989	0.71779	0.617228	0	0.0055138	0.164552	UP	1.25357
AT5G61380	2.707	107.695	96.0978	107.814	57.6623	49.4741	48.1469	0	0.000618474	0.104438	DOWN	-1.00483
AT5G61660	0.716	18.9449	11.5236	9.44079	32.5578	35.3773	26.7835	0	0.00926675	0.187817	UP	1.24692
AT5G62040	0.534	0.754679	0.280516	0.597362	1.9347	1.59117	2.34743	0.0125986	0.0087101	0.186192	UP	1.84704
AT5G62670	3.271	12.7751	10.1327	11.4674	22.7072	26.0665	24.9501	0.0127356	0.000636184	0.104796	UP	1.10076
AT5G62710	2.225	7.09655	6.55169	5.76148	13.6901	13.7075	12.9704	0	0.000319013	0.0957152	UP	1.05643
AT5G63750	1.773	0.164673	0.0842514	0.0703019	0.644636	0.492932	0.527728	0	0.00230533	0.130859	UP	2.38313
AT5G63970	1.631	5.89165	4.96681	7.27808	14.0564	15.9966	15.6388	0.0205484	0.000552904	0.102651	UP	1.33303
AT5G65070	1.103	1.09458	0.963933	1.4343	3.38681	2.86467	2.91368	0	0.00109771	0.110773	UP	1.39177
AT5G65090	1.971	0.612541	0.440378	0.355115	1.18649	0.958836	0.90402	0.0182192	0.00929352	0.187906	UP	1.11482
AT5G65450	2.196	6.13382	5.47782	4.13476	18.4189	17.2357	13.9419	0	0.00616047	0.169686	UP	1.65522
AT5G66840	1.656	0.586104	0.334285	0.619521	1.26456	0.969814	1.05633	0	0.00968561	0.18945	UP	1.09555
AT5G67270	1.265	6.05702	3.93849	4.0702	11.2848	8.85159	10.4773	0	0.00512642	0.162824	UP	1.122
AT1G43590
AT1G68050
AT2G29630
AT3G26740
AT3G27940
AT4G11370
AT4G17140
AT4G27657
AT4G32340
AT5G18130
AT5G19220
AT5G48250
AT5G52070
AT5G61380

## Sheet: Share_Up
M_logFC	BC_logFC	geneID	description	comp_description	IPR_domain
4.50811	4.20682	AT1G36675	glycine-rich protein	glycine-rich protein; FUNCTIONS IN: molecular_function unknown; INVOLVED IN: biological_process unknown; LOCATED IN: chloroplast; BEST Arabidopsis thaliana protein match is: unknown protein (TAIR:AT2G10975.1)
4.26951	3.26298	AT1G48510	Surfeit locus 1 cytochrome c oxidase biogenesis protein	Surfeit locus 1 cytochrome c oxidase biogenesis protein; FUNCTIONS IN: molecular_function unknown; INVOLVED IN: biological_process unknown; EXPRESSED IN: root; CONTAINS InterPro DOMAIN/s: Surfeit locus 1 (InterPro:IPR002994); BEST Arabidopsis thaliana protein match is: Surfeit locus 1 cytochrome c oxidase biogenesis protein (TAIR:AT3G17910.1)	Surfeit locus 1/Shy1
2.83167	3.17877	AT2G34010		unknown protein; BEST Arabidopsis thaliana protein match is: unknown protein (TAIR:AT1G29010.1)
2.05447	2.93977	AT3G54530		unknown protein; FUNCTIONS IN: molecular_function unknown; INVOLVED IN: biological_process unknown; LOCATED IN: cellular_component unknown; BEST Arabidopsis thaliana protein match is: unknown protein (TAIR:AT3G54520.1)
2.10761	2.90064	AT4G01270	RING/U-box superfamily protein	RING/U-box superfamily protein; FUNCTIONS IN: zinc ion binding; EXPRESSED IN: 12 plant structures; EXPRESSED DURING: 7 growth stages; CONTAINS InterPro DOMAIN/s: Zinc finger, RING-type (InterPro:IPR001841), Zinc finger, C3HC4 RING-type (InterPro:IPR018957); BEST Arabidopsis thaliana protein match is: unknown protein (TAIR:AT4G01245.1)	Zinc finger, RING-type | Zinc finger, RING/FYVE/PHD-type
2.67396	2.87483	AT2G24030	zinc ion binding;nucleic acid binding	zinc ion binding;nucleic acid binding; FUNCTIONS IN: zinc ion binding, nucleic acid binding; INVOLVED IN: biological_process unknown; EXPRESSED IN: cultured cell; LOCATED IN: intracellular; CONTAINS InterPro DOMAIN/s: Zinc finger, U1-type (InterPro:IPR003604), Zinc finger, double-stranded RNA binding (InterPro:IPR022755); CONTAINS InterPro DOMAIN/s: Zinc finger, C2H2-like (InterPro:IPR015880), Zi…	Zinc finger, C2H2-like | Zinc finger, U1-type
2.59105	2.72846	AT5G28917	Pseudogene of AT1G40087
2.27609	2.6332	AT2G16310		pseudogene, RER1-related protein, blastp match of 58% identity and 2.2e-53 P-value to GP|10945247|dbj|BAB16908.1||AP002863 putative Rer1A protein (AtRer1A) {Oryza sativa (japonica cultivar-group)}
2.02535	2.61235	AT4G20230	Terpenoid cyclases/Protein prenyltransferases superfamily protein	Terpenoid cyclases/Protein prenyltransferases superfamily protein; FUNCTIONS IN: lyase activity, magnesium ion binding; INVOLVED IN: metabolic process; EXPRESSED IN: hypocotyl, root; CONTAINS InterPro DOMAIN/s: Terpene synthase, metal-binding domain (InterPro:IPR005630), Terpenoid synthase (InterPro:IPR008949), Terpenoid cylases/protein prenyltransferase alpha-alpha toroid (InterPro:IPR008930), T…
1.97249	2.54906	AT2G31650	homologue of trithorax	homologue of trithorax (ATX1); CONTAINS InterPro DOMAIN/s: SET domain (InterPro:IPR001214), Zinc finger, PHD-type, conserved site (InterPro:IPR019786), Zinc finger, PHD-type (InterPro:IPR001965), FY-rich, C-terminal (InterPro:IPR003889), Post-SET domain (InterPro:IPR003616), FY-rich, N-terminal (InterPro:IPR003888), Protein kinase C-like, phorbol ester/diacylglycerol binding (InterPro:IPR002219),…	FY-rich, C-terminal | FY-rich, N-terminal | Lamin-B receptor of TUDOR domain | PWWP domain | Post-SET domain | Protein kinase C-like, phorbol ester/diacylglycerol-binding domain | SET domain | Zinc finger, FYVE/PHD-type | Zinc finger, PHD-finger | Zinc finger, PHD-type | Zinc finger, PHD-type, conserved site | Zinc finger, RING/FYVE/PHD-type
1.98558	2.39813	AT1G01660	RING/U-box superfamily protein	RING/U-box superfamily protein; FUNCTIONS IN: ubiquitin-protein ligase activity; INVOLVED IN: protein ubiquitination; LOCATED IN: ubiquitin ligase complex; CONTAINS InterPro DOMAIN/s: U box domain (InterPro:IPR003613); BEST Arabidopsis thaliana protein match is: U-box domain-containing protein kinase family protein (TAIR:AT2G45910.1)	Rossmann-like alpha/beta/alpha sandwich fold | U box domain | Zinc finger, RING/FYVE/PHD-type
2.02921	2.34709	AT3G28330	F-box family protein-related	F-box family protein-related; CONTAINS InterPro DOMAIN/s: F-box associated interaction domain (InterPro:IPR017451); BEST Arabidopsis thaliana protein match is: F-box family protein (TAIR:AT3G28223.1)
3.93906	2.22555	AT2G28960	Leucine-rich repeat protein kinase family protein	Leucine-rich repeat protein kinase family protein; FUNCTIONS IN: protein serine/threonine kinase activity, protein kinase activity, kinase activity, ATP binding; INVOLVED IN: protein amino acid phosphorylation; LOCATED IN: endomembrane system; EXPRESSED IN: 6 plant structures; EXPRESSED DURING: 4 anthesis, C globular stage; CONTAINS InterPro DOMAIN/s: Protein kinase, ATP binding site (InterPro:IP…	Concanavalin A-like lectin/glucanase, subgroup | Leucine-rich repeat | Malectin-like carbohydrate-binding domain | Protein kinase domain | Protein kinase, ATP binding site | Protein kinase-like domain | Serine/threonine-protein kinase, active site
2.00213	2.21116	AT3G13280	Putative endonuclease or glycosyl hydrolase	Putative endonuclease or glycosyl hydrolase; BEST Arabidopsis thaliana protein match is: zinc finger protein-related (TAIR:AT3G62850.1)	Meiosis arrest female protein 1 | NYN domain, limkain-b1-type
1.92772	2.19611	AT3G59100	glucan synthase-like 11	glucan synthase-like 11 (GSL11); FUNCTIONS IN: transferase activity, transferring glycosyl groups, 1,3-beta-glucan synthase activity; INVOLVED IN: 1,3-beta-glucan biosynthetic process; LOCATED IN: 1,3-beta-glucan synthase complex, membrane; EXPRESSED IN: 22 plant structures; EXPRESSED DURING: 13 growth stages; CONTAINS InterPro DOMAIN/s: Glycosyl transferase, family 48 (InterPro:IPR003440), Prote…	1,3-beta-glucan synthase subunit FKS1-like, domain-1 | Callose synthase | Glycosyl transferase, family 48 | Vacuolar protein sorting-associate protein Vta1/Callose synthase, N-terminal domain
1.99121	2.14762	AT2G34880	Transcription factor jumonji (jmj) family protein / zinc finger (C5HC2 type) family protein	maternal effect embryo arrest 27 (MEE27); FUNCTIONS IN: sequence-specific DNA binding transcription factor activity; INVOLVED IN: embryo development ending in seed dormancy, regulation of transcription, pollen development; LOCATED IN: nucleus; EXPRESSED IN: sperm cell; CONTAINS InterPro DOMAIN/s: Transcription factor jumonji/aspartyl beta-hydroxylase (InterPro:IPR003347), FY-rich, C-terminal (Int…	FY-rich, C-terminal | FY-rich, N-terminal | JmjC domain | Transcription factor jumonji, JmjN | Zinc finger, C5HC2-type
2.26067	2.12872	AT2G33640	DHHC-type zinc finger family protein	DHHC-type zinc finger family protein; FUNCTIONS IN: zinc ion binding; LOCATED IN: endomembrane system; EXPRESSED IN: 9 plant structures; EXPRESSED DURING: 4 anthesis, F mature embryo stage, petal differentiation and expansion stage, E expanded cotyledon stage, D bilateral stage; CONTAINS InterPro DOMAIN/s: Zinc finger, DHHC-type (InterPro:IPR001594); BEST Arabidopsis thaliana protein match is: DH…	Zinc finger, DHHC-type, palmitoyltransferase
2.24104	2.10079	AT1G71200	basic helix-loop-helix (bHLH) DNA-binding superfamily protein	basic helix-loop-helix (bHLH) DNA-binding superfamily protein; FUNCTIONS IN: DNA binding, sequence-specific DNA binding transcription factor activity; INVOLVED IN: regulation of transcription; LOCATED IN: nucleus; CONTAINS InterPro DOMAIN/s: Helix-loop-helix DNA-binding domain (InterPro:IPR001092), Helix-loop-helix DNA-binding (InterPro:IPR011598); BEST Arabidopsis thaliana protein match is: basi…	Myc-type, basic helix-loop-helix (bHLH) domain
3.00995	2.09648	AT1G06320		unknown protein
2.71654	2.0364	AT2G17050	disease resistance protein (TIR-NBS-LRR class), putative	disease resistance protein (TIR-NBS-LRR class), putative; FUNCTIONS IN: transmembrane receptor activity, ATP binding; INVOLVED IN: signal transduction, apoptosis, defense response, innate immune response; LOCATED IN: intrinsic to membrane; CONTAINS InterPro DOMAIN/s: NB-ARC (InterPro:IPR002182), Leucine-rich repeat, typical subtype (InterPro:IPR003591), Leucine-rich repeat (InterPro:IPR001611), D…	Leucine rich repeat 4 | Leucine-rich repeat | Leucine-rich repeat 3 | NB-ARC | P-loop containing nucleoside triphosphate hydrolase | Toll/interleukin-1 receptor homology (TIR) domain
3.11194	2.02571	AT5G11920	6-&1-fructan exohydrolase	6-&1-fructan exohydrolase (cwINV6); FUNCTIONS IN: inulinase activity, hydrolase activity, hydrolyzing O-glycosyl compounds, levanase activity; INVOLVED IN: carbohydrate metabolic process; EXPRESSED IN: 10 plant structures; EXPRESSED DURING: 8 growth stages; CONTAINS InterPro DOMAIN/s: Glycoside hydrolase, family 32 (InterPro:IPR001362), Glycoside hydrolase, family 32, active site (InterPro:IPR018…	Concanavalin A-like lectin/glucanases superfamily | Glycoside hydrolase, family 32 | Glycoside hydrolase, family 32, active site | Glycosyl hydrolase family 32, C-terminal | Glycosyl hydrolase family 32, N-terminal | Glycosyl hydrolase, five-bladed beta-propellor domain
2.70825	1.95211	AT3G54770	RNA-binding (RRM/RBD/RNP motifs) family protein	RNA-binding (RRM/RBD/RNP motifs) family protein; FUNCTIONS IN: RNA binding, nucleotide binding, nucleic acid binding; LOCATED IN: cellular_component unknown; EXPRESSED IN: root, gynoecium, carpel, stamen; EXPRESSED DURING: petal differentiation and expansion stage; CONTAINS InterPro DOMAIN/s: RNA recognition motif, RNP-1 (InterPro:IPR000504), Nucleotide-binding, alpha-beta plait (InterPro:IPR0126…	Nucleotide-binding, alpha-beta plait | RNA recognition motif domain
2.3512	1.9325	AT3G30875		pseudogene, putative multidrug resistance protein, similar to multidrug resistance protein 1 homolog GB:T06165 GI:7442649 from (Hordeum vulgare); blastp match of 54% identity and 0. P-value to GP|2292907|emb|CAA71179.1||Y10099 P-glycoprotein homologue {Hordeum vulgare subsp. vulgare}
2.09073	1.89533	AT1G04050	homolog of SU(var)3-9 1	homolog of SU(var)3-9 1 (SUVR1); FUNCTIONS IN: zinc ion binding, histone-lysine N-methyltransferase activity; INVOLVED IN: chromatin modification; LOCATED IN: nucleolus; EXPRESSED IN: 21 plant structures; EXPRESSED DURING: 14 growth stages; CONTAINS InterPro DOMAIN/s: SET domain (InterPro:IPR001214), WIYLD domain (InterPro:IPR018848), Pre-SET zinc-binding sub-group (InterPro:IPR003606), Pre-SET d…	Histone-lysine N-methyltransferase SUVR1/2/4 | Post-SET domain | Pre-SET domain | Pre-SET zinc-binding sub-group | SET domain | WIYLD domain
1.78214	1.88173	AT3G14510	Polyprenyl synthetase family protein	Polyprenyl synthetase family protein; INVOLVED IN: isoprenoid biosynthetic process; EXPRESSED IN: root; CONTAINS InterPro DOMAIN/s: Polyprenyl synthetase-related (InterPro:IPR017446), Terpenoid synthase (InterPro:IPR008949), Polyprenyl synthetase (InterPro:IPR000092); BEST Arabidopsis thaliana protein match is: geranylgeranyl pyrophosphate synthase 3 (TAIR:AT3G14550.1)
1.26299	1.87497	AT1G07270	Cell division control, Cdc6	Cell division control, Cdc6; FUNCTIONS IN: ATP binding; INVOLVED IN: regulation of cell cycle, DNA replication; EXPRESSED IN: 22 plant structures; EXPRESSED DURING: 12 growth stages; CONTAINS InterPro DOMAIN/s: ATPase, AAA-type, core (InterPro:IPR003959), CDC6, C-terminal (InterPro:IPR015163), Cell division control, Cdc6 (InterPro:IPR016314); BEST Arabidopsis thaliana protein match is: cell divis…	CDC6, C-terminal domain | Cell division protein Cdc6/18 | P-loop containing nucleoside triphosphate hydrolase | Winged helix-turn-helix DNA-binding domain
1.43021	1.87456	AT3G02410	alpha/beta-Hydrolases superfamily protein	Isoprenylcysteine methylesterase-like 2 (ICME-LIKE2); FUNCTIONS IN: hydrolase activity; INVOLVED IN: metabolic process; LOCATED IN: cellular_component unknown; CONTAINS InterPro DOMAIN/s: Carboxylesterase type B, active site (InterPro:IPR019826), Carboxylesterase, type B (InterPro:IPR002018), Alpha/beta hydrolase fold-3 (InterPro:IPR013094); BEST Arabidopsis thaliana protein match is: prenylcyste…	Alpha/Beta hydrolase fold | Alpha/beta hydrolase fold-3 | Carboxylesterase type B, active site
1.89784	1.869	AT4G11110	SPA1-related 2	SPA1-related 2 (SPA2); FUNCTIONS IN: protein binding, signal transducer activity; INVOLVED IN: protein amino acid phosphorylation; LOCATED IN: CUL4 RING ubiquitin ligase complex, heterotrimeric G-protein complex; EXPRESSED IN: 23 plant structures; EXPRESSED DURING: 14 growth stages; CONTAINS InterPro DOMAIN/s: WD40 repeat 2 (InterPro:IPR019782), WD40 repeat, conserved site (InterPro:IPR019775), W…	G-protein beta WD-40 repeat | Protein kinase domain | Protein kinase-like domain | WD40 repeat | WD40 repeat, conserved site | WD40-repeat-containing domain | WD40/YVTN repeat-like-containing domain
1.15155	1.8392	AT5G18065		unknown protein; BEST Arabidopsis thaliana protein match is: unknown protein (TAIR:AT4G29760.1)
1.62606	1.80557	AT1G63295	Remorin family protein	Remorin family protein; CONTAINS InterPro DOMAIN/s: Remorin, C-terminal (InterPro:IPR005516); BEST Arabidopsis thaliana protein match is: Remorin family protein (TAIR:AT3G61260.1)
2.52953	1.78649	AT5G20470	myosin, putative	myosin, putative; CONTAINS InterPro DOMAIN/s: Dil domain (InterPro:IPR018444), Dilute (InterPro:IPR002710); BEST Arabidopsis thaliana protein match is: Myosin family protein with Dil domain (TAIR:AT5G20490.2)	Dil domain | Dilute
1.9622	1.76066	AT3G16320	Tetratricopeptide repeat (TPR)-like superfamily protein	CDC27a; FUNCTIONS IN: binding; INVOLVED IN: regulation of cell division, cell cycle, gamete generation, regulation of unidimensional cell growth; LOCATED IN: anaphase-promoting complex; EXPRESSED IN: 9 plant structures; EXPRESSED DURING: 8 growth stages; CONTAINS InterPro DOMAIN/s: Tetratricopeptide TPR-1 (InterPro:IPR001440), Tetratricopeptide-like helical (InterPro:IPR011990), Tetratricopeptide…	Tetratricopeptide TPR1 | Tetratricopeptide repeat | Tetratricopeptide repeat-containing domain | Tetratricopeptide-like helical domain
2.79746	1.75012	AT1G20400	Protein of unknown function (DUF1204)	FUNCTIONS IN: molecular_function unknown; INVOLVED IN: biological_process unknown; LOCATED IN: cellular_component unknown; EXPRESSED IN: cultured cell; CONTAINS InterPro DOMAIN/s: Protein of unknown function DUF1204 (InterPro:IPR009596); BEST Arabidopsis thaliana protein match is: myosin heavy chain-related (TAIR:AT2G15420.1)	Domain of unknown function DUF1204
1.78363	1.7415	AT1G29200	O-fucosyltransferase family protein	O-fucosyltransferase family protein; FUNCTIONS IN: molecular_function unknown; INVOLVED IN: biological_process unknown; LOCATED IN: endomembrane system; EXPRESSED IN: 8 plant structures; EXPRESSED DURING: 4 anthesis, petal differentiation and expansion stage; CONTAINS InterPro DOMAIN/s: GDP-fucose protein O-fucosyltransferase (InterPro:IPR019378); BEST Arabidopsis thaliana protein match is: O-fuc…	GDP-fucose protein O-fucosyltransferase | O-fucosyltransferase, plant
1.32544	1.74104	AT1G08260	DNA polymerase epsilon catalytic subunit	TILTED 1 (TIL1); FUNCTIONS IN: DNA-directed DNA polymerase activity, DNA binding, nucleotide binding, zinc ion binding, nucleic acid binding; INVOLVED IN: positive regulation of S phase of mitotic cell cycle, negative regulation of long-day photoperiodism, flowering, embryo development ending in seed dormancy; LOCATED IN: apoplast, epsilon DNA polymerase complex; EXPRESSED IN: 19 plant structures…	DNA polymerase epsilon catalytic subunit | DNA polymerase epsilon, catalytic subunit A, C-terminal | DNA-directed DNA polymerase, family B | DNA-directed DNA polymerase, family B, exonuclease domain | DNA-directed DNA polymerase, family B, multifunctional domain | Ribonuclease H-like domain
2.10792	1.73961	AT5G02360	DC1 domain-containing protein	DC1 domain-containing protein; FUNCTIONS IN: zinc ion binding; INVOLVED IN: biological_process unknown; LOCATED IN: intracellular; CONTAINS InterPro DOMAIN/s: DC1 (InterPro:IPR004146), Zinc finger, RanBP2-type (InterPro:IPR001876), C1-like (InterPro:IPR011424); BEST Arabidopsis thaliana protein match is: Cysteine/Histidine-rich C1 domain family protein (TAIR:AT1G53340.1)	C1-like | DC1 | Zinc finger, RanBP2-type
1.46712	1.73809	AT4G32730	Homeodomain-like protein	ARABIDOOSIS THALIANA MYB DOMAIN PROTEIN 3R1 (ATMYB3R1); PC-MYB1; CONTAINS InterPro DOMAIN/s: SANT, DNA-binding (InterPro:IPR001005), Myb, DNA-binding (InterPro:IPR014778), Homeodomain-like (InterPro:IPR009057), Homeodomain-related (InterPro:IPR012287), HTH transcriptional regulator, Myb-type, DNA-binding (InterPro:IPR017930), Myb transcription factor (InterPro:IPR015495); CONTAINS InterPro DOMAIN…	Homeodomain-like | Myb domain | SANT/Myb domain
1.28054	1.73509	AT4G29230	NAC domain containing protein 75	NAC domain containing protein 75 (NAC075); FUNCTIONS IN: sequence-specific DNA binding transcription factor activity; INVOLVED IN: multicellular organismal development, regulation of transcription; EXPRESSED IN: inflorescence meristem, flower; EXPRESSED DURING: petal differentiation and expansion stage; CONTAINS InterPro DOMAIN/s: No apical meristem (NAM) protein (InterPro:IPR003441); BEST Arabid…	NAC domain
1.15629	1.73366	AT4G21270	kinesin 1	kinesin 1 (ATK1); CONTAINS InterPro DOMAIN/s: Kinesin, motor region, conserved site (InterPro:IPR019821), Kinesin, motor domain (InterPro:IPR001752); BEST Arabidopsis thaliana protein match is: kinesin 5 (TAIR:AT4G05190.1)	Kinesin, motor domain | Kinesin, motor region, conserved site | Kinesin-like protein | P-loop containing nucleoside triphosphate hydrolase
3.41071	1.70601	AT2G23630	SKU5 similar 16	SKU5 similar 16 (sks16); FUNCTIONS IN: pectinesterase activity, copper ion binding; INVOLVED IN: oxidation reduction; LOCATED IN: endomembrane system; EXPRESSED IN: shoot apex, hypocotyl, root; CONTAINS InterPro DOMAIN/s: Multicopper oxidase, type 3 (InterPro:IPR011707), Cupredoxin (InterPro:IPR008972), Multicopper oxidase, type 2 (InterPro:IPR011706), Multicopper oxidase, type 1 (InterPro:IPR001…	Cupredoxin | Multicopper oxidase, type 1 | Multicopper oxidase, type 2 | Multicopper oxidase, type 3
1.18713	1.70485	AT3G26922	F-box/RNI-like superfamily protein	F-box/RNI-like superfamily protein; FUNCTIONS IN: molecular_function unknown; INVOLVED IN: biological_process unknown; LOCATED IN: cellular_component unknown; CONTAINS InterPro DOMAIN/s: F-box domain, cyclin-like (InterPro:IPR001810), F-box domain, Skp2-like (InterPro:IPR022364), Leucine-rich repeat 2 (InterPro:IPR013101); BEST Arabidopsis thaliana protein match is: F-box/RNI-like/FBD-like domain…	F-box domain | Leucine-rich repeat 2
1.51357	1.67032	AT2G01760	response regulator 14	response regulator 14 (RR14); CONTAINS InterPro DOMAIN/s: Response regulator, plant B-type (InterPro:IPR017053), Myb-like DNA-binding domain, SHAQKYF class (InterPro:IPR006447), CheY-like (InterPro:IPR011006), Homeodomain-like (InterPro:IPR009057), Myb, DNA-binding (InterPro:IPR014778), Signal transduction response regulator, receiver domain (InterPro:IPR001789), Homeodomain-related (InterPro:IPR…	CheY-like superfamily | Homeodomain-like | Myb domain | Myb domain, plants | Response regulator, plant B-type | SANT/Myb domain | Signal transduction response regulator, receiver domain
2.15165	1.65522	AT5G65450	ubiquitin-specific protease 17	ubiquitin-specific protease 17 (UBP17); FUNCTIONS IN: cysteine-type endopeptidase activity, ubiquitin thiolesterase activity, zinc ion binding; INVOLVED IN: ubiquitin-dependent protein catabolic process; LOCATED IN: mitochondrion; EXPRESSED IN: 24 plant structures; EXPRESSED DURING: 12 growth stages; CONTAINS InterPro DOMAIN/s: Zinc finger, MYND-type (InterPro:IPR002893), Peptidase C19, ubiquitin…	Peptidase C19, ubiquitin carboxyl-terminal hydrolase | Peptidase C19, ubiquitin carboxyl-terminal hydrolase, conserved site | Ubiquitin carboxyl-terminal hydrolase-like domain | Zinc finger, MYND-type
1.6197	1.64569	AT3G28880	Ankyrin repeat family protein	Ankyrin repeat family protein; CONTAINS InterPro DOMAIN/s: Ankyrin repeat-containing domain (InterPro:IPR020683), Ankyrin repeat (InterPro:IPR002110); BEST Arabidopsis thaliana protein match is: Ankyrin repeat family protein (TAIR:AT2G03430.1)	Ankyrin repeat | Ankyrin repeat-containing domain | OST-HTH/LOTUS domain
2.43566	1.64513	AT4G01240	S-adenosyl-L-methionine-dependent methyltransferases superfamily protein	S-adenosyl-L-methionine-dependent methyltransferases superfamily protein; CONTAINS InterPro DOMAIN/s: Protein of unknown function DUF248, methyltransferase putative (InterPro:IPR004159); BEST Arabidopsis thaliana protein match is: unknown protein (TAIR:AT3G05390.1)	Putative S-adenosyl-L-methionine-dependent methyltransferase | S-adenosyl-L-methionine-dependent methyltransferase-like
1.21893	1.64268	AT5G27895	transposable element gene	gypsy-like retrotransposon family, has a 3.2e-102 P-value blast match to GB:AAD11615 prpol (gypsy_Ty3-element) (Zea mays)
1.7142	1.64174	AT1G27720	TBP-associated factor 4B	TBP-associated factor 4B (TAF4B); FUNCTIONS IN: transcription initiation factor activity; INVOLVED IN: transcription initiation; LOCATED IN: transcription factor TFIID complex; EXPRESSED IN: 6 plant structures; EXPRESSED DURING: L mature pollen stage, M germinated pollen stage; CONTAINS InterPro DOMAIN/s: Transcription initiation factor TFIID component TAF4 (InterPro:IPR007900), RST domain of pla…	Histone-fold | RST domain of plant C-terminal | Transcription initiation factor TFIID component TAF4
2.28256	1.62245	AT3G47980	Integral membrane HPP family protein	Integral membrane HPP family protein; FUNCTIONS IN: molecular_function unknown; INVOLVED IN: biological_process unknown; LOCATED IN: integral to membrane, chloroplast; EXPRESSED IN: root; CONTAINS InterPro DOMAIN/s: HPP (InterPro:IPR007065); BEST Arabidopsis thaliana protein match is: Integral membrane HPP family protein (TAIR:AT5G62720.1)	HPP
2.29968	1.60738	AT5G06839	bZIP transcription factor family protein	bZIP transcription factor family protein; FUNCTIONS IN: DNA binding, sequence-specific DNA binding transcription factor activity; INVOLVED IN: regulation of transcription, DNA-dependent; INVOLVED IN: signal transduction, protein amino acid phosphorylation, regulation of transcription, DNA-dependent; EXPRESSED IN: leaf whorl, root, flower, seed; EXPRESSED DURING: 4 anthesis, petal differentiation …	Basic-leucine zipper domain | Transcription factor TGA like domain
1.33927	1.60683	AT1G04960	Protein of unknown function (DUF1664)	Protein of unknown function (DUF1664); FUNCTIONS IN: molecular_function unknown; INVOLVED IN: biological_process unknown; LOCATED IN: endomembrane system; EXPRESSED IN: 22 plant structures; EXPRESSED DURING: 13 growth stages; CONTAINS InterPro DOMAIN/s: Protein of unknown function DUF1664 (InterPro:IPR012458); BEST Arabidopsis thaliana protein match is: Protein of unknown function (DUF1664) (TAIR…	Protein of unknown function DUF1664
1.40485	1.60477	AT5G20490	Myosin family protein with Dil domain	XIK; FUNCTIONS IN: motor activity; INVOLVED IN: in 11 processes; LOCATED IN: endomembrane system, myosin complex; LOCATED IN: myosin complex; EXPRESSED IN: 6 plant structures; EXPRESSED IN: stem, fruit, flower, root, leaf; EXPRESSED DURING: seedling growth; CONTAINS InterPro DOMAIN/s: Dil domain (InterPro:IPR018444), Dilute (InterPro:IPR002710), Myosin head, motor domain (InterPro:IPR001609), IQ …	Dil domain | Dilute | IQ motif, EF-hand binding site | Myosin head, motor domain | P-loop containing nucleoside triphosphate hydrolase
2.04837	1.59774	AT2G38320	TRICHOME BIREFRINGENCE-LIKE 34	TRICHOME BIREFRINGENCE-LIKE 34 (TBL34); INVOLVED IN: biological_process unknown; LOCATED IN: endomembrane system; EXPRESSED IN: 20 plant structures; EXPRESSED DURING: 11 growth stages; CONTAINS InterPro DOMAIN/s: Protein of unknown function DUF231, plant (InterPro:IPR004253); BEST Arabidopsis thaliana protein match is: TRICHOME BIREFRINGENCE-LIKE 35 (TAIR:AT5G01620.2)	PC-Esterase | PMR5 N-terminal domain
1.74518	1.59693	AT4G17483	alpha/beta-Hydrolases superfamily protein	alpha/beta-Hydrolases superfamily protein; FUNCTIONS IN: palmitoyl-(protein) hydrolase activity; INVOLVED IN: protein modification process; LOCATED IN: endomembrane system; EXPRESSED IN: 15 plant structures; EXPRESSED DURING: 8 growth stages; CONTAINS InterPro DOMAIN/s: Palmitoyl protein thioesterase (InterPro:IPR002472); BEST Arabidopsis thaliana protein match is: alpha/beta-Hydrolases superfami…	Alpha/Beta hydrolase fold | Palmitoyl protein thioesterase
1.76935	1.59448	AT3G23110	receptor like protein 37	receptor like protein 37 (RLP37); FUNCTIONS IN: kinase activity; INVOLVED IN: signal transduction, defense response; LOCATED IN: endomembrane system; CONTAINS InterPro DOMAIN/s: Leucine-rich repeat-containing N-terminal domain, type 2 (InterPro:IPR013210), Leucine-rich repeat (InterPro:IPR001611); BEST Arabidopsis thaliana protein match is: receptor like protein 38 (TAIR:AT3G23120.1)	Leucine rich repeat 4 | Leucine-rich repeat | Leucine-rich repeat-containing N-terminal, type 2
1.44789	1.59342	AT5G01270	carboxyl-terminal domain (ctd) phosphatase-like 2	carboxyl-terminal domain (ctd) phosphatase-like 2 (CPL2); FUNCTIONS IN: double-stranded RNA binding, phosphatase activity; INVOLVED IN: response to auxin stimulus, response to osmotic stress, developmental growth; LOCATED IN: intracellular; EXPRESSED IN: 25 plant structures; EXPRESSED DURING: 14 growth stages; CONTAINS InterPro DOMAIN/s: Double-stranded RNA-binding (InterPro:IPR001159), Double-st…	Double-stranded RNA-binding domain | HAD-like domain | NLI interacting factor
1.3389	1.58187	AT4G00050	basic helix-loop-helix (bHLH) DNA-binding superfamily protein	unfertilized embryo sac 10 (UNE10); FUNCTIONS IN: DNA binding, sequence-specific DNA binding transcription factor activity; INVOLVED IN: double fertilization forming a zygote and endosperm, regulation of transcription; LOCATED IN: nucleus; EXPRESSED IN: 20 plant structures; EXPRESSED DURING: 13 growth stages; CONTAINS InterPro DOMAIN/s: Helix-loop-helix DNA-binding domain (InterPro:IPR001092), He…	Myc-type, basic helix-loop-helix (bHLH) domain
1.17109	1.58182	AT2G40550	E2F target gene 1	E2F target gene 1 (ETG1); FUNCTIONS IN: molecular_function unknown; INVOLVED IN: sister chromatid cohesion, postreplication repair, DNA replication; LOCATED IN: nuclear replisome, nucleus, chloroplast envelope, MCM complex; EXPRESSED IN: 24 plant structures; EXPRESSED DURING: 15 growth stages; CONTAINS InterPro DOMAIN/s: Protein of unknown function DUF2044, membrane (InterPro:IPR019140)	Mini-chromosome maintenance complex-binding protein
1.48645	1.57975	AT1G59850	ARM repeat superfamily protein	ARM repeat superfamily protein; FUNCTIONS IN: binding; INVOLVED IN: biological_process unknown; LOCATED IN: cellular_component unknown; CONTAINS InterPro DOMAIN/s: Armadillo-like helical (InterPro:IPR011989), Armadillo-type fold (InterPro:IPR016024); BEST Arabidopsis thaliana protein match is: ARM repeat superfamily protein (TAIR:AT1G27210.1)	Armadillo-like helical | Armadillo-type fold | HEAT repeat associated with sister chromatid cohesion protein
1.95999	1.56953	AT1G26970	Protein kinase superfamily protein	Protein kinase superfamily protein; FUNCTIONS IN: protein serine/threonine kinase activity, protein kinase activity, kinase activity, ATP binding; INVOLVED IN: protein amino acid phosphorylation, N-terminal protein myristoylation; LOCATED IN: chloroplast; CONTAINS InterPro DOMAIN/s: Protein kinase, ATP binding site (InterPro:IPR017441), Protein kinase, catalytic domain (InterPro:IPR000719), Serin…	Concanavalin A-like lectin/glucanase, subgroup | Protein kinase domain | Protein kinase, ATP binding site | Protein kinase-like domain | Serine-threonine/tyrosine-protein kinase catalytic domain | Serine/threonine-protein kinase, active site
1.32582	1.55571	AT4G00020	BREAST CANCER 2 like 2A	BREAST CANCER 2 like 2A (BRCA2(IV)); FUNCTIONS IN: single-stranded DNA binding; INVOLVED IN: meiosis, embryo sac morphogenesis, embryo sac development, embryo development ending in seed dormancy; LOCATED IN: nucleus; CONTAINS InterPro DOMAIN/s: Nucleic acid-binding, OB-fold-like (InterPro:IPR016027), DNA recombination/repair protein BRCA2, helical domain (InterPro:IPR015252), DNA recombination an…	BRCA2 repeat | BRCA2, oligonucleotide/oligosaccharide-binding 1 | Breast cancer type 2 susceptibility protein | Breast cancer type 2 susceptibility protein, helical domain | Nucleic acid-binding, OB-fold
1.31984	1.55051	AT3G19470	F-box and associated interaction domains-containing protein	F-box and associated interaction domains-containing protein; CONTAINS InterPro DOMAIN/s: F-box domain, cyclin-like (InterPro:IPR001810), F-box domain, Skp2-like (InterPro:IPR022364), F-box associated domain, type 1 (InterPro:IPR006527), F-box associated interaction domain (InterPro:IPR017451); BEST Arabidopsis thaliana protein match is: F-box associated ubiquitination effector family protein (TAI…	F-box associated domain, type 1 | F-box associated interaction domain | F-box domain
1.46797	1.53309	AT1G59890	SIN3-like 5	SIN3-like 5 (SNL5); FUNCTIONS IN: molecular_function unknown; INVOLVED IN: regulation of transcription, DNA-dependent; LOCATED IN: nucleus; EXPRESSED IN: 24 plant structures; EXPRESSED DURING: 15 growth stages; CONTAINS InterPro DOMAIN/s: Histone deacetylase interacting (InterPro:IPR013194), Paired amphipathic helix (InterPro:IPR003822); BEST Arabidopsis thaliana protein match is: SIN3-like 6 (TA…	Histone deacetylase interacting | Paired amphipathic helix
1.43082	1.52897	AT1G64210	Leucine-rich repeat protein kinase family protein	Leucine-rich repeat protein kinase family protein; FUNCTIONS IN: protein serine/threonine kinase activity, kinase activity, ATP binding; INVOLVED IN: transmembrane receptor protein tyrosine kinase signaling pathway, protein amino acid phosphorylation; LOCATED IN: mitochondrion; EXPRESSED IN: flower; EXPRESSED DURING: petal differentiation and expansion stage; CONTAINS InterPro DOMAIN/s: Protein k…	Leucine rich repeat 4 | Leucine-rich repeat-containing N-terminal, type 2 | Protein kinase domain | Protein kinase, ATP binding site | Protein kinase-like domain
1.26723	1.52879	AT2G22610	Di-glucose binding protein with Kinesin motor domain	Di-glucose binding protein with Kinesin motor domain; FUNCTIONS IN: microtubule motor activity, ATP binding; INVOLVED IN: microtubule-based movement; EXPRESSED IN: 20 plant structures; EXPRESSED DURING: 10 growth stages; CONTAINS InterPro DOMAIN/s: Kinesin, motor region, conserved site (InterPro:IPR019821), Malectin/receptor-like protein kinase (InterPro:IPR021720), Kinesin, motor domain (InterPr…	Kinesin, motor domain | Kinesin, motor region, conserved site | Kinesin-like protein | Malectin | P-loop containing nucleoside triphosphate hydrolase
2.19998	1.52497	AT1G79580	NAC (No Apical Meristem) domain transcriptional regulator superfamily protein	SOMBRERO (SMB); CONTAINS InterPro DOMAIN/s: No apical meristem (NAM) protein (InterPro:IPR003441); BEST Arabidopsis thaliana protein match is: NAC domain containing protein 70 (TAIR:AT4G10350.1)	NAC domain
1.33077	1.52242	AT2G35660	FAD/NAD(P)-binding oxidoreductase family protein	CTF2A; FUNCTIONS IN: monooxygenase activity; INVOLVED IN: oxidation reduction; CONTAINS InterPro DOMAIN/s: Monooxygenase, FAD-binding (InterPro:IPR002938); BEST Arabidopsis thaliana protein match is: FAD/NAD(P)-binding oxidoreductase family protein (TAIR:AT2G29720.1)	Aromatic-ring hydroxylase-like | Monooxygenase, FAD-binding
2.27596	1.51644	AT5G07390	respiratory burst oxidase homolog A	respiratory burst oxidase homolog A (RBOHA); CONTAINS InterPro DOMAIN/s: Ferredoxin reductase-type FAD-binding domain (InterPro:IPR017927), Cytochrome b245, heavy chain (InterPro:IPR000778), EF-Hand 1, calcium-binding site (InterPro:IPR018247), EF-hand-like domain (InterPro:IPR011992), Ferric reductase-like transmembrane component, N-terminal (InterPro:IPR013130), Ferric reductase, NAD binding (I…	Cytochrome b245, heavy chain | EF-Hand 1, calcium-binding site | EF-hand domain | EF-hand domain pair | FAD-binding 8 | Ferredoxin reductase-type FAD-binding domain | Ferric reductase transmembrane component-like domain | Ferric reductase, NAD binding | NADPH oxidase Respiratory burst | Riboflavin synthase-like beta-barrel
1.48325	1.51327	AT3G51130		unknown protein; CONTAINS InterPro DOMAIN/s: Uncharacterised protein family UPF0183 (InterPro:IPR005373)	Uncharacterised protein family UPF0183
1.44963	1.50577	AT5G01630	BRCA2-like B	BRCA2-like B (BRCA2B); FUNCTIONS IN: single-stranded DNA binding; INVOLVED IN: meiosis; LOCATED IN: mitochondrion; CONTAINS InterPro DOMAIN/s: Nucleic acid-binding, OB-fold-like (InterPro:IPR016027), DNA recombination/repair protein BRCA2, helical domain (InterPro:IPR015252), DNA recombination and repair protein, BRCA2 (InterPro:IPR011370), BRCA2, oligonucleotide/oligosaccharide-binding 1 (InterP…	BRCA2 repeat | BRCA2, oligonucleotide/oligosaccharide-binding 1 | Breast cancer type 2 susceptibility protein | Breast cancer type 2 susceptibility protein, helical domain | Nucleic acid-binding, OB-fold
2.31887	1.49847	AT5G02350	Cysteine/Histidine-rich C1 domain family protein	Cysteine/Histidine-rich C1 domain family protein; FUNCTIONS IN: zinc ion binding; EXPRESSED IN: root; CONTAINS InterPro DOMAIN/s: Zinc finger, RING-type (InterPro:IPR001841), DC1 (InterPro:IPR004146), Zinc finger, PHD-type (InterPro:IPR001965), C1-like (InterPro:IPR011424); BEST Arabidopsis thaliana protein match is: Cysteine/Histidine-rich C1 domain family protein (TAIR:AT2G13900.1)	C1-like | DC1 | Zinc finger, PHD-type | Zinc finger, RING-type | Zinc finger, RING/FYVE/PHD-type
1.38982	1.49212	AT5G01510	Protein of unknown function, DUF647	ROOT UV-B SENSITIVE 5 (RUS5); CONTAINS InterPro DOMAIN/s: Protein of unknown function DUF647 (InterPro:IPR006968); BEST Arabidopsis thaliana protein match is: Protein of unknown function, DUF647 (TAIR:AT3G45890.1)	Vitamin B6 photo-protection and homoeostasis
1.88541	1.48156	AT1G52450	Ubiquitin carboxyl-terminal hydrolase-related protein	Ubiquitin carboxyl-terminal hydrolase-related protein; FUNCTIONS IN: ubiquitin thiolesterase activity; INVOLVED IN: ubiquitin-dependent protein catabolic process; LOCATED IN: cellular_component unknown; CONTAINS InterPro DOMAIN/s: Protein of unknown function DUF627 (InterPro:IPR006866), Peptidase C19, ubiquitin carboxyl-terminal hydrolase 2 (InterPro:IPR001394), Protein of unknown function DUF629…	Domain of unknown function DUF627, N-terminal | Domain of unknown function DUF629 | Peptidase C19, ubiquitin carboxyl-terminal hydrolase
1.95473	1.47354	AT1G64480	calcineurin B-like protein 8	calcineurin B-like protein 8 (CBL8); CONTAINS InterPro DOMAIN/s: EF-Hand 1, calcium-binding site (InterPro:IPR018247), Calcineurin B protein (InterPro:IPR015757), Recoverin (InterPro:IPR001125), Calcium-binding EF-hand (InterPro:IPR002048), EF-hand-like domain (InterPro:IPR011992), EF-hand (InterPro:IPR018248), EF-HAND 2 (InterPro:IPR018249); BEST Arabidopsis thaliana protein match is: Calcium-bi…	Calcineurin B protein | EF-Hand 1, calcium-binding site | EF-hand domain | EF-hand domain pair
1.26612	1.46841	AT3G46540	ENTH/VHS family protein	ENTH/VHS family protein; FUNCTIONS IN: binding; INVOLVED IN: biological_process unknown; LOCATED IN: cellular_component unknown; EXPRESSED IN: 22 plant structures; EXPRESSED DURING: 13 growth stages; CONTAINS InterPro DOMAIN/s: Epsin, N-terminal (InterPro:IPR001026), Epsin-like, N-terminal (InterPro:IPR013809), ENTH/VHS (InterPro:IPR008942); BEST Arabidopsis thaliana protein match is: ENTH/VHS fa…	ENTH/VHS | Epsin domain, N-terminal | Epsin-like, N-terminal
1.30336	1.4542	AT3G10915	Reticulon family protein	Reticulon family protein; INVOLVED IN: biological_process unknown; LOCATED IN: endoplasmic reticulum; CONTAINS InterPro DOMAIN/s: Reticulon (InterPro:IPR003388); BEST Arabidopsis thaliana protein match is: Reticulon family protein (TAIR:AT2G15280.1); BEST Arabidopsis thaliana protein match is: Reticulon family protein (TAIR:AT3G61560.1); BEST Arabidopsis thaliana protein match is: VIRB2-interacti…	Reticulon
1.77877	1.43682	AT1G60680	NAD(P)-linked oxidoreductase superfamily protein	NAD(P)-linked oxidoreductase superfamily protein; FUNCTIONS IN: oxidoreductase activity, aldo-keto reductase activity; INVOLVED IN: oxidation reduction; EXPRESSED IN: hypocotyl, root; CONTAINS InterPro DOMAIN/s: Aldo/keto reductase (InterPro:IPR001395), Aldo/keto reductase subgroup (InterPro:IPR020471); BEST Arabidopsis thaliana protein match is: NAD(P)-linked oxidoreductase superfamily protein (…	Aldo/keto reductase | Aldo/keto reductase subgroup | NADP-dependent oxidoreductase domain
1.31461	1.41652	AT2G28240	ATP-dependent helicase family protein	ATP-dependent helicase family protein; BEST Arabidopsis thaliana protein match is: ATP-dependent helicase family protein (TAIR:AT1G08060.2)
1.05889	1.40129	AT3G59800		unknown protein; BEST Arabidopsis thaliana protein match is: unknown protein (TAIR:AT2G43795.2)
1.01285	1.39687	AT5G44560	SNF7 family protein	VPS2.2; CONTAINS InterPro DOMAIN/s: Snf7 (InterPro:IPR005024); BEST Arabidopsis thaliana protein match is: vacuolar protein sorting-associated protein 2.3 (TAIR:AT1G03950.1)	Snf7
1.05573	1.39458	AT5G26170	WRKY DNA-binding protein 50	WRKY DNA-binding protein 50 (WRKY50); CONTAINS InterPro DOMAIN/s: DNA-binding WRKY (InterPro:IPR003657); BEST Arabidopsis thaliana protein match is: WRKY DNA-binding protein 51 (TAIR:AT5G64810.1)	DNA-binding WRKY
3.41346	1.39002	AT1G18970	germin-like protein 4	germin-like protein 4 (GLP4); FUNCTIONS IN: manganese ion binding, nutrient reservoir activity; LOCATED IN: endomembrane system, apoplast; EXPRESSED IN: root; CONTAINS InterPro DOMAIN/s: Cupin, RmlC-type (InterPro:IPR011051), Cupin 1 (InterPro:IPR006045), RmlC-like jelly roll fold (InterPro:IPR014710), Germin (InterPro:IPR001929), Germin, manganese binding site (InterPro:IPR019780); BEST Arabidop…	Cupin 1 | Germin | Germin, manganese binding site | RmlC-like cupin domain | RmlC-like jelly roll fold
1.22916	1.37936	AT5G45030	Trypsin family protein	Trypsin family protein; FUNCTIONS IN: catalytic activity; INVOLVED IN: biological_process unknown; LOCATED IN: cellular_component unknown; CONTAINS InterPro DOMAIN/s: Serine/cysteine peptidase, trypsin-like (InterPro:IPR009003); BEST Arabidopsis thaliana protein match is: Trypsin family protein (TAIR:AT2G35155.1)	Trypsin-like cysteine/serine peptidase domain
2.25417	1.37761	AT4G10640	IQ-domain 16	IQ-domain 16 (IQD16); CONTAINS InterPro DOMAIN/s: IQ calmodulin-binding region (InterPro:IPR000048); BEST Arabidopsis thaliana protein match is: IQ-domain 17 (TAIR:AT4G00820.1)	Domain of unknown function DUF4005 | IQ motif, EF-hand binding site
1.17942	1.37512	AT1G62130	AAA-type ATPase family protein	AAA-type ATPase family protein; FUNCTIONS IN: nucleoside-triphosphatase activity, ATPase activity, nucleotide binding, ATP binding; INVOLVED IN: biological_process unknown; LOCATED IN: chloroplast; EXPRESSED IN: 16 plant structures; EXPRESSED DURING: 9 growth stages; CONTAINS InterPro DOMAIN/s: ATPase, AAA-type, core (InterPro:IPR003959), ATPase, AAA+ type, core (InterPro:IPR003593), SMAD/FHA dom…	AAA+ ATPase domain | ATPase, AAA-type, conserved site | ATPase, AAA-type, core | Forkhead-associated (FHA) domain | P-loop containing nucleoside triphosphate hydrolase | SMAD/FHA domain
1.21991	1.36517	AT4G38760	Protein of unknown function (DUF3414)	Protein of unknown function (DUF3414); CONTAINS InterPro DOMAIN/s: Protein of unknown function DUF3414 (InterPro:IPR021827); BEST Arabidopsis thaliana protein match is: unknown protein (TAIR:AT4G10845.1)	Nucleoporin Nup186/Nup192/Nup205
1.40745	1.36149	AT5G48720	x-ray induced transcript 1	X-RAY INDUCED TRANSCRIPT 1 (XRI1); FUNCTIONS IN: molecular_function unknown; INVOLVED IN: DNA repair, female meiosis, response to X-ray, pollen development, male meiosis; LOCATED IN: nucleus; EXPRESSED IN: 21 plant structures; EXPRESSED DURING: 11 growth stages; BEST Arabidopsis thaliana protein match is: unknown protein (TAIR:AT2G01990.1)
1.67108	1.35998	AT3G21710		unknown protein
1.00857	1.35018	AT4G34140	D111/G-patch domain-containing protein	D111/G-patch domain-containing protein; FUNCTIONS IN: nucleic acid binding; LOCATED IN: intracellular; EXPRESSED IN: 16 plant structures; EXPRESSED DURING: 7 growth stages; CONTAINS InterPro DOMAIN/s: D111/G-patch (InterPro:IPR000467); BEST Arabidopsis thaliana protein match is: suppressor of abi3-5 (TAIR:AT3G54230.2)	G-patch domain
2.07952	1.34814	AT2G24610	cyclic nucleotide-gated channel 14	cyclic nucleotide-gated channel 14 (CNGC14); FUNCTIONS IN: ion channel activity, cyclic nucleotide binding, calmodulin binding; INVOLVED IN: potassium ion transport, ion transport, transmembrane transport; LOCATED IN: membrane; EXPRESSED IN: 9 plant structures; EXPRESSED DURING: 6 growth stages; CONTAINS InterPro DOMAIN/s: Cyclic nucleotide-binding (InterPro:IPR000595), Potassium channel, voltage…	Cyclic nucleotide-binding domain | Cyclic nucleotide-binding-like | Ion transport domain | Potassium channel, voltage-dependent, EAG/ELK/ERG | RmlC-like jelly roll fold
1.1175	1.348	AT3G16730		CONTAINS InterPro DOMAIN/s: Non-SMC condensin II complex, subunit H2-like (InterPro:IPR009378)	Non-SMC condensin II complex, subunit H2-like
1.19396	1.34676	AT5G45160	Root hair defective 3 GTP-binding protein (RHD3)	Root hair defective 3 GTP-binding protein (RHD3); FUNCTIONS IN: GTP binding; LOCATED IN: endoplasmic reticulum; EXPRESSED IN: 24 plant structures; EXPRESSED DURING: 13 growth stages; CONTAINS InterPro DOMAIN/s: Root hair defective 3 GTP-binding (InterPro:IPR008803); BEST Arabidopsis thaliana protein match is: Root hair defective 3 GTP-binding protein (RHD3) (TAIR:AT3G13870.1)	P-loop containing nucleoside triphosphate hydrolase | RHD3/Sey1
1.49395	1.3351	AT5G05400	LRR and NB-ARC domains-containing disease resistance protein	LRR and NB-ARC domains-containing disease resistance protein; FUNCTIONS IN: ATP binding; INVOLVED IN: N-terminal protein myristoylation, defense response, apoptosis; LOCATED IN: chloroplast; EXPRESSED IN: stem, root; CONTAINS InterPro DOMAIN/s: NB-ARC (InterPro:IPR002182), Disease resistance protein (InterPro:IPR000767); BEST Arabidopsis thaliana protein match is: Disease resistance protein (CC-N…	Leucine-rich repeat | NB-ARC | P-loop containing nucleoside triphosphate hydrolase
1.64802	1.33479	AT1G13300	myb-like transcription factor family protein	HYPERSENSITIVITY TO LOW PI-ELICITED PRIMARY ROOT SHORTENING 1 (HRS1); CONTAINS InterPro DOMAIN/s: Homeodomain-like (InterPro:IPR009057), Myb, DNA-binding (InterPro:IPR014778), HTH transcriptional regulator, Myb-type, DNA-binding (InterPro:IPR017930), Myb-like DNA-binding domain, SHAQKYF class (InterPro:IPR006447), Homeodomain-related (InterPro:IPR012287); BEST Arabidopsis thaliana protein match i…	Homeodomain-like | Myb domain | Myb domain, plants | SANT/Myb domain
1.1231	1.31911	AT1G17260	autoinhibited H(+)-ATPase isoform 10	autoinhibited H(+)-ATPase isoform 10 (AHA10); FUNCTIONS IN: ATPase activity, cation-transporting ATPase activity, ATPase activity, coupled to transmembrane movement of ions, phosphorylative mechanism; INVOLVED IN: vacuole organization, vacuolar acidification, proanthocyanidin biosynthetic process; LOCATED IN: chloroplast; EXPRESSED IN: 18 plant structures; EXPRESSED DURING: 10 growth stages; CONT…	Cation-transporting P-type ATPase | Cation-transporting P-type ATPase, N-terminal | H+ transporting P-type ATPase, subfamily IIIA | HAD-like domain | P-type ATPase, transmembrane domain | P-type ATPase, A domain | P-type ATPase, cytoplasmic domain N | P-type ATPase, phosphorylation site
1.73939	1.31649	AT2G48130	Bifunctional inhibitor/lipid-transfer protein/seed storage 2S albumin superfamily protein	Bifunctional inhibitor/lipid-transfer protein/seed storage 2S albumin superfamily protein; FUNCTIONS IN: lipid binding; INVOLVED IN: lipid transport; LOCATED IN: anchored to membrane; EXPRESSED IN: hypocotyl, root, flower; EXPRESSED DURING: petal differentiation and expansion stage; CONTAINS InterPro DOMAIN/s: Bifunctional inhibitor/plant lipid transfer protein/seed storage (InterPro:IPR016140), …	Bifunctional inhibitor/plant lipid transfer protein/seed storage helical domain | Plant lipid transfer protein/Par allergen
1.29428	1.30956	AT1G02010	secretory 1A	secretory 1A (SEC1A); FUNCTIONS IN: protein transporter activity; INVOLVED IN: protein secretion, vesicle-mediated transport, vesicle docking involved in exocytosis; LOCATED IN: cellular_component unknown; CONTAINS InterPro DOMAIN/s: Sec1-like protein (InterPro:IPR001619); BEST Arabidopsis thaliana protein match is: Sec1/munc18-like (SM) proteins superfamily (TAIR:AT1G12360.1)	Sec1-like protein | Sec1-like, domain 2
1.27954	1.30867	AT2G34390	NOD26-like intrinsic protein 2;1	NOD26-like intrinsic protein 2;1 (NIP2;1); CONTAINS InterPro DOMAIN/s: Major intrinsic protein, conserved site (InterPro:IPR022357), Aquaporin (InterPro:IPR012269), Major intrinsic protein (InterPro:IPR000425); BEST Arabidopsis thaliana protein match is: NOD26-like intrinsic protein 1;2 (TAIR:AT4G18910.1)	Aquaporin-like | Major intrinsic protein | Major intrinsic protein, conserved site
1.44696	1.30647	AT5G10330	histidinol phosphate aminotransferase 1	histidinol phosphate aminotransferase 1 (HPA1); CONTAINS InterPro DOMAIN/s: Pyridoxal phosphate-dependent transferase, major domain (InterPro:IPR015424), Aminotransferase, class I/classII (InterPro:IPR004839), Histidinol-phosphate aminotransferase (InterPro:IPR005861), Pyridoxal phosphate-dependent transferase, major region, subdomain 1 (InterPro:IPR015421), Pyridoxal phosphate-dependent transfer…	Aminotransferase, class I/classII | Histidinol-phosphate aminotransferase family | Pyridoxal phosphate-dependent transferase | Pyridoxal phosphate-dependent transferase, major region, subdomain 1 | Pyridoxal phosphate-dependent transferase, major region, subdomain 2
2.80583	1.30141	AT1G53940	GDSL-motif lipase 2	GDSL-motif lipase 2 (GLIP2); FUNCTIONS IN: lipase activity, arylesterase activity, carboxylesterase activity; INVOLVED IN: response to jasmonic acid stimulus, response to ethylene stimulus, defense response to bacterium, response to salicylic acid stimulus; LOCATED IN: endomembrane system; EXPRESSED IN: seedling, stem, cotyledon, hypocotyl, root; CONTAINS InterPro DOMAIN/s: Lipase, GDSL, active s…
1.52008	1.29818	AT3G30841	Cofactor-independent phosphoglycerate mutase	Cofactor-independent phosphoglycerate mutase; FUNCTIONS IN: catalytic activity, metal ion binding; INVOLVED IN: metabolic process; LOCATED IN: cellular_component unknown; CONTAINS InterPro DOMAIN/s: Cofactor-independent phosphoglycerate mutase, archaeal (InterPro:IPR004456), Metalloenzyme (InterPro:IPR006124), Alkaline-phosphatase-like, core domain (InterPro:IPR017850), 2,3-bisphosphoglycerate-in…	Alkaline phosphatase-like, alpha/beta/alpha | Alkaline-phosphatase-like, core domain | Bisphosphoglycerate-independent phosphoglycerate mutase | Metalloenzyme
1.02995	1.29578	AT3G17660	ARF-GAP domain 15	ARF-GAP domain 15 (AGD15); FUNCTIONS IN: ARF GTPase activator activity, DNA binding, zinc ion binding; INVOLVED IN: regulation of ARF GTPase activity; LOCATED IN: nucleus; CONTAINS InterPro DOMAIN/s: Arf GTPase activating protein (InterPro:IPR001164); BEST Arabidopsis thaliana protein match is: ARF-GAP domain 5 (TAIR:AT5G54310.1)	Arf GTPase activating protein
1.00377	1.28805	AT3G56570	SET domain-containing protein	SET domain-containing protein; CONTAINS InterPro DOMAIN/s: RuBisCO-cytochrome methylase, RMS1 (InterPro:IPR011383); BEST Arabidopsis thaliana protein match is: Rubisco methyltransferase family protein (TAIR:AT1G14030.1)	RuBisCO-cytochrome methylase, RMS1 | Rubisco LSMT, substrate-binding domain | SET domain
1.24844	1.28401	AT4G16845	VEFS-Box of polycomb protein	REDUCED VERNALIZATION RESPONSE 2 (VRN2); FUNCTIONS IN: sequence-specific DNA binding transcription factor activity; INVOLVED IN: response to cold, regulation of gene expression by genetic imprinting, vernalization response; LOCATED IN: nucleus; EXPRESSED IN: 24 plant structures; EXPRESSED DURING: 14 growth stages; CONTAINS InterPro DOMAIN/s: Polycomb protein, VEFS-Box (InterPro:IPR019135); BEST A…	Polycomb protein, VEFS-Box | Zinc finger, C2H2-like
1.04154	1.28221	AT2G29210	splicing factor PWI domain-containing protein	splicing factor PWI domain-containing protein; INVOLVED IN: RNA splicing; EXPRESSED IN: 23 plant structures; EXPRESSED DURING: 13 growth stages; CONTAINS InterPro DOMAIN/s: Splicing factor PWI (InterPro:IPR002483); BEST Arabidopsis thaliana protein match is: Polynucleotidyl transferase, ribonuclease H-like superfamily protein (TAIR:AT3G12440.1)	PWI domain
1.1839	1.28131	AT1G60080	3'-5'-exoribonuclease family protein	3'-5'-exoribonuclease family protein; FUNCTIONS IN: 3'-5'-exoribonuclease activity, RNA binding; INVOLVED IN: RNA processing; LOCATED IN: cellular_component unknown; EXPRESSED IN: 20 plant structures; EXPRESSED DURING: 12 growth stages; CONTAINS InterPro DOMAIN/s: Exoribonuclease, phosphorolytic domain 2 (InterPro:IPR015847), Exoribonuclease, phosphorolytic domain 1 (InterPro:IPR001247), Ribosoma…	Exoribonuclease, phosphorolytic domain 1 | Exoribonuclease, phosphorolytic domain 2 | Ribosomal protein S5 domain 2-type fold
1.02929	1.28093	AT4G30520	Leucine-rich repeat protein kinase family protein	Leucine-rich repeat protein kinase family protein; FUNCTIONS IN: protein serine/threonine kinase activity, protein kinase activity, ATP binding; INVOLVED IN: protein amino acid phosphorylation; LOCATED IN: endomembrane system; EXPRESSED IN: 21 plant structures; EXPRESSED DURING: 13 growth stages; CONTAINS InterPro DOMAIN/s: Protein kinase, ATP binding site (InterPro:IPR017441), Protein kinase, ca…	Leucine rich repeat 4 | Leucine-rich repeat | Leucine-rich repeat-containing N-terminal, type 2 | Protein kinase domain | Protein kinase, ATP binding site | Protein kinase-like domain | Serine-threonine/tyrosine-protein kinase catalytic domain | Serine/threonine-protein kinase, active site
1.2416	1.27657	AT5G12920	Transducin/WD40 repeat-like superfamily protein	Transducin/WD40 repeat-like superfamily protein; FUNCTIONS IN: molecular_function unknown; INVOLVED IN: biological_process unknown; LOCATED IN: CUL4 RING ubiquitin ligase complex; CONTAINS InterPro DOMAIN/s: WD40 repeat-like-containing domain (InterPro:IPR011046), WD40/YVTN repeat-like-containing domain (InterPro:IPR015943)	WD40 repeat | WD40-repeat-containing domain | WD40/YVTN repeat-like-containing domain
1.09047	1.27571	AT1G03190	RAD3-like DNA-binding helicase protein	ULTRAVIOLET HYPERSENSITIVE 6 (UVH6); FUNCTIONS IN: in 6 functions; INVOLVED IN: DNA repair, response to UV, response to heat; LOCATED IN: nucleus; EXPRESSED IN: 25 plant structures; EXPRESSED DURING: 14 growth stages; CONTAINS InterPro DOMAIN/s: Helicase, superfamily 1/2, ATP-binding domain, DinG/Rad3-type (InterPro:IPR014013), Xeroderma pigmentosum group D protein (InterPro:IPR001945), Helicase-…	ATP-dependent helicase, C-terminal | DEAD2 | DNA helicase (DNA repair), Rad3 type | DNA/RNA helicase, ATP-dependent, DEAH-box type, conserved site | Domain of unknown function DUF1227 | Helicase, superfamily 1/2, ATP-binding domain, DinG/Rad3-type | Helicase-like, DEXD box c2 type | P-loop containing nucleoside triphosphate hydrolase | Xeroderma pigmentosum group D protein
1.28669	1.27275	AT3G14400	ubiquitin-specific protease 25	ubiquitin-specific protease 25 (UBP25); FUNCTIONS IN: ubiquitin-specific protease activity, ubiquitin thiolesterase activity; INVOLVED IN: ubiquitin-dependent protein catabolic process; EXPRESSED IN: 24 plant structures; EXPRESSED DURING: 15 growth stages; CONTAINS InterPro DOMAIN/s: Peptidase C19, ubiquitin carboxyl-terminal hydrolase 2, conserved site (InterPro:IPR018200), Peptidase C19, ubiqui…	Peptidase C19, ubiquitin carboxyl-terminal hydrolase | Peptidase C19, ubiquitin carboxyl-terminal hydrolase, conserved site | Ubiquitin carboxyl-terminal hydrolase-like domain
1.43236	1.26683	AT1G55690	Sec14p-like phosphatidylinositol transfer family protein	Sec14p-like phosphatidylinositol transfer family protein; CONTAINS InterPro DOMAIN/s: Cellular retinaldehyde-binding/triple function, C-terminal (InterPro:IPR001251), Cellular retinaldehyde-binding/triple function, N-terminal (InterPro:IPR008273), Phosphatidylinositol transfer protein-like, N-terminal (InterPro:IPR011074); BEST Arabidopsis thaliana protein match is: Sec14p-like phosphatidylinosit…	CRAL-TRIO domain | CRAL/TRIO, N-terminal domain
1.23472	1.25875	AT4G16690	methyl esterase 16	methyl esterase 16 (MES16); FUNCTIONS IN: hydrolase activity, acting on ester bonds, methyl jasmonate esterase activity, catalytic activity, methyl indole-3-acetate esterase activity; LOCATED IN: cellular_component unknown; EXPRESSED IN: 22 plant structures; EXPRESSED DURING: 13 growth stages; BEST Arabidopsis thaliana protein match is: methyl esterase 18 (TAIR:AT5G58310.1)	Alpha/Beta hydrolase fold
1.24829	1.25708	AT1G10530		unknown protein; FUNCTIONS IN: molecular_function unknown; INVOLVED IN: N-terminal protein myristoylation; BEST Arabidopsis thaliana protein match is: unknown protein (TAIR:AT1G60010.1)	Protein of unknown function DUF4228, plant
1.53502	1.24912	AT5G03250	Phototropic-responsive NPH3 family protein	Phototropic-responsive NPH3 family protein; FUNCTIONS IN: signal transducer activity; INVOLVED IN: response to light stimulus; LOCATED IN: cellular_component unknown; EXPRESSED IN: 10 plant structures; EXPRESSED DURING: 4 anthesis, F mature embryo stage, petal differentiation and expansion stage, E expanded cotyledon stage, D bilateral stage; CONTAINS InterPro DOMAIN/s: NPH3 (InterPro:IPR004249),…	BTB/POZ | BTB/POZ fold | BTB/POZ-like | NPH3 domain
1.59689	1.24722	AT4G23515	Toll-Interleukin-Resistance (TIR) domain family protein	Toll-Interleukin-Resistance (TIR) domain family protein; FUNCTIONS IN: transmembrane receptor activity; INVOLVED IN: signal transduction, defense response, innate immune response; LOCATED IN: membrane; CONTAINS InterPro DOMAIN/s: Toll-Interleukin receptor (InterPro:IPR000157); BEST Arabidopsis thaliana protein match is: phloem protein 2-A8 (TAIR:AT5G45070.1)	Toll/interleukin-1 receptor homology (TIR) domain
1.13799	1.24692	AT5G61660	glycine-rich protein	glycine-rich protein; FUNCTIONS IN: molecular_function unknown; INVOLVED IN: biological_process unknown; LOCATED IN: endomembrane system; EXPRESSED IN: 19 plant structures; EXPRESSED DURING: 9 growth stages
1.08082	1.24372	AT4G38730	Protein of unknown function (DUF803)	Protein of unknown function (DUF803); CONTAINS InterPro DOMAIN/s: Protein of unknown function DUF803 (InterPro:IPR008521); BEST Arabidopsis thaliana protein match is: Protein of unknown function (DUF803) (TAIR:AT2G21120.1)	Magnesium transporter NIPA
1.40662	1.24043	AT3G47400	Plant invertase/pectin methylesterase inhibitor superfamily	Plant invertase/pectin methylesterase inhibitor superfamily; FUNCTIONS IN: enzyme inhibitor activity, pectinesterase activity; INVOLVED IN: cell wall modification; LOCATED IN: endomembrane system, cell wall, plant-type cell wall; EXPRESSED IN: hypocotyl, flower, root, carpel; EXPRESSED DURING: petal differentiation and expansion stage; CONTAINS InterPro DOMAIN/s: Pectinesterase, active site (Inte…	Pectin lyase fold | Pectin lyase fold/virulence factor | Pectinesterase inhibitor domain | Pectinesterase, active site | Pectinesterase, catalytic
1.1347	1.23784	AT5G23000	myb domain protein 37	myb domain protein 37 (MYB37); FUNCTIONS IN: DNA binding, sequence-specific DNA binding transcription factor activity; INVOLVED IN: regulation of transcription, DNA-dependent, regulation of transcription; CONTAINS InterPro DOMAIN/s: SANT, DNA-binding (InterPro:IPR001005), Homeodomain-like (InterPro:IPR009057), Myb, DNA-binding (InterPro:IPR014778), HTH transcriptional regulator, Myb-type, DNA-bin…	Homeodomain-like | Myb domain | SANT/Myb domain
1.31434	1.22852	AT3G51480	glutamate receptor 3.6	glutamate receptor 3.6 (GLR3.6); FUNCTIONS IN: intracellular ligand-gated ion channel activity; INVOLVED IN: cellular calcium ion homeostasis, response to light stimulus; LOCATED IN: endomembrane system, integral to membrane, membrane; EXPRESSED IN: 15 plant structures; EXPRESSED DURING: 6 growth stages; CONTAINS InterPro DOMAIN/s: Extracellular solute-binding protein, family 3 (InterPro:IPR00163…	Extracellular ligand-binding receptor | Extracellular solute-binding protein, family 3 | Ionotropic glutamate receptor | Ionotropic glutamate receptor, plant | Periplasmic binding protein-like I
1.4995	1.22537	AT1G53920	GDSL-motif lipase 5	GDSL-motif lipase 5 (GLIP5); FUNCTIONS IN: lipase activity, carboxylesterase activity; INVOLVED IN: lipid metabolic process; EXPRESSED IN: 18 plant structures; EXPRESSED DURING: 12 growth stages; CONTAINS InterPro DOMAIN/s: Lipase, GDSL (InterPro:IPR001087); BEST Arabidopsis thaliana protein match is: GDSL lipase 1 (TAIR:AT5G40990.1)	Lipase, GDSL | SGNH hydrolase-type esterase domain
1.30658	1.22339	AT2G22600	RNA-binding KH domain-containing protein	RNA-binding KH domain-containing protein; FUNCTIONS IN: RNA binding, nucleic acid binding; INVOLVED IN: biological_process unknown; EXPRESSED IN: 10 plant structures; EXPRESSED DURING: 8 growth stages; CONTAINS InterPro DOMAIN/s: K Homology (InterPro:IPR004087), K Homology, type 1, subgroup (InterPro:IPR018111), K Homology, type 1 (InterPro:IPR004088); BEST Arabidopsis thaliana protein match is: …	K Homology domain | K Homology domain, type 1
1.38644	1.21935	AT5G50120	Transducin/WD40 repeat-like superfamily protein	Transducin/WD40 repeat-like superfamily protein; CONTAINS InterPro DOMAIN/s: WD40 repeat 2 (InterPro:IPR019782), WD40 repeat, conserved site (InterPro:IPR019775), WD40 repeat (InterPro:IPR001680), G-protein beta WD-40 repeat, region (InterPro:IPR020472), WD40 repeat-like-containing domain (InterPro:IPR011046), WD40-repeat-containing domain (InterPro:IPR017986), WD40/YVTN repeat-like-containing do…	G-protein beta WD-40 repeat | WD40 repeat | WD40 repeat, conserved site | WD40-repeat-containing domain | WD40/YVTN repeat-like-containing domain
1.44577	1.21447	AT5G41590	Protein of unknown function (DUF567)	Protein of unknown function (DUF567); CONTAINS InterPro DOMAIN/s: Protein of unknown function DUF567 (InterPro:IPR007612); BEST Arabidopsis thaliana protein match is: Protein of unknown function (DUF567) (TAIR:AT2G38640.1)	LURP1-like domain | Tubby C-terminal-like domain
1.64649	1.20924	AT2G18000	TBP-associated factor 14	TBP-associated factor 14 (TAF14); INVOLVED IN: regulation of transcription, DNA-dependent; LOCATED IN: nucleus; CONTAINS InterPro DOMAIN/s: YEATS (InterPro:IPR005033); BEST Arabidopsis thaliana protein match is: YEATS family protein (TAIR:AT5G45600.1); BEST Arabidopsis thaliana protein match is: YEATS family protein (TAIR:AT5G45600.2)	YEATS
1.09558	1.20545	AT4G16570	protein arginine methyltransferase 7	protein arginine methyltransferase 7 (PRMT7); FUNCTIONS IN: methyltransferase activity; INVOLVED IN: protein amino acid methylation; LOCATED IN: chloroplast; EXPRESSED IN: 19 plant structures; EXPRESSED DURING: 13 growth stages; CONTAINS InterPro DOMAIN/s: Protein arginine N-methyltransferase (InterPro:IPR014644); BEST Arabidopsis thaliana protein match is: protein arginine methyltransferase 4A (…	Protein arginine N-methyltransferase | Protein arginine N-methyltransferase PRMT7 | S-adenosyl-L-methionine-dependent methyltransferase-like
1.05473	1.19604	AT1G42470	Patched family protein	Patched family protein; FUNCTIONS IN: hedgehog receptor activity; LOCATED IN: plasma membrane, membrane; EXPRESSED IN: 24 plant structures; EXPRESSED DURING: 14 growth stages; CONTAINS InterPro DOMAIN/s: Niemann-Pick C type protein (InterPro:IPR004765), Patched (InterPro:IPR003392), Sterol-sensing 5TM box (InterPro:IPR000731); BEST Arabidopsis thaliana protein match is: Patched family protein (TA…	Niemann-Pick C type protein | Patched | Sterol-sensing domain
1.18263	1.18216	AT5G55560	Protein kinase superfamily protein	Protein kinase superfamily protein; FUNCTIONS IN: protein kinase activity, kinase activity, ATP binding; INVOLVED IN: protein amino acid phosphorylation; LOCATED IN: cellular_component unknown; EXPRESSED IN: 15 plant structures; EXPRESSED DURING: 8 growth stages; CONTAINS InterPro DOMAIN/s: Protein kinase, catalytic domain (InterPro:IPR000719), Serine/threonine-protein kinase-like domain (InterPr…	Protein kinase domain | Protein kinase-like domain
1.83021	1.17826	AT1G07290	golgi nucleotide sugar transporter 2	golgi nucleotide sugar transporter 2 (GONST2); CONTAINS InterPro DOMAIN/s: Protein of unknown function DUF250 (InterPro:IPR004853); BEST Arabidopsis thaliana protein match is: golgi nucleotide sugar transporter 1 (TAIR:AT2G13650.3)
2.06879	1.1753	AT5G15120	Protein of unknown function (DUF1637)	Protein of unknown function (DUF1637); FUNCTIONS IN: cysteamine dioxygenase activity; INVOLVED IN: anaerobic respiration; LOCATED IN: cellular_component unknown; EXPRESSED IN: 20 plant structures; EXPRESSED DURING: 8 growth stages; CONTAINS InterPro DOMAIN/s: Protein of unknown function DUF1637 (InterPro:IPR012864); BEST Arabidopsis thaliana protein match is: Protein of unknown function (DUF1637)…	Cysteamine dioxygenase | RmlC-like cupin domain | RmlC-like jelly roll fold
1.45835	1.17457	AT4G15280	UDP-glucosyl transferase 71B5	UDP-glucosyl transferase 71B5 (UGT71B5); FUNCTIONS IN: quercetin 3-O-glucosyltransferase activity, UDP-glycosyltransferase activity, transferase activity, transferring glycosyl groups; INVOLVED IN: metabolic process; LOCATED IN: cellular_component unknown; CONTAINS InterPro DOMAIN/s: UDP-glucuronosyl/UDP-glucosyltransferase (InterPro:IPR002213); BEST Arabidopsis thaliana protein match is: UDP-Gly…	UDP-glucuronosyl/UDP-glucosyltransferase
1.66897	1.16074	AT2G16980	Major facilitator superfamily protein	Major facilitator superfamily protein; FUNCTIONS IN: tetracycline transporter activity; INVOLVED IN: response to antibiotic, tetracycline transport, transmembrane transport; LOCATED IN: endomembrane system, integral to membrane; EXPRESSED IN: 6 plant structures; EXPRESSED DURING: L mature pollen stage, 4 anthesis; CONTAINS InterPro DOMAIN/s: Tetracycline resistance protein, TetA (InterPro:IPR0019…	Major facilitator superfamily | Major facilitator superfamily domain, general substrate transporter | Tetracycline resistance protein, TetA/multidrug resistance protein MdtG
2.32308	1.15753	AT5G38550	Mannose-binding lectin superfamily protein	Mannose-binding lectin superfamily protein; CONTAINS InterPro DOMAIN/s: Mannose-binding lectin (InterPro:IPR001229); BEST Arabidopsis thaliana protein match is: Mannose-binding lectin superfamily protein (TAIR:AT5G38540.1)	Mannose-binding lectin
2.15411	1.15385	AT1G71400	receptor like protein 12	receptor like protein 12 (RLP12); INVOLVED IN: signal transduction, defense response; LOCATED IN: endomembrane system; EXPRESSED IN: 7 plant structures; EXPRESSED DURING: LP.04 four leaves visible, petal differentiation and expansion stage; CONTAINS InterPro DOMAIN/s: Leucine-rich repeat, typical subtype (InterPro:IPR003591), Leucine-rich repeat-containing N-terminal domain, type 2 (InterPro:IPR0…	Leucine-rich repeat | Leucine-rich repeat-containing N-terminal, type 2
1.12591	1.15244	AT3G06650	ATP-citrate lyase B-1	ATP-citrate lyase B-1 (ACLB-1); FUNCTIONS IN: ATP citrate synthase activity; INVOLVED IN: acetyl-CoA biosynthetic process; LOCATED IN: citrate lyase complex, membrane; EXPRESSED IN: 23 plant structures; EXPRESSED DURING: 14 growth stages; CONTAINS InterPro DOMAIN/s: Succinyl-CoA synthetase, beta subunit, conserved site (InterPro:IPR017866), Citrate synthase-like, small alpha subdomain (InterPro:I…	ATP-citrate lyase/succinyl-CoA ligase | ATP-citrate lyase/succinyl-CoA ligase, active site | Citrate synthase-like | Citrate synthase-like, core | Citrate synthase-like, large alpha subdomain | Citrate synthase-like, small alpha subdomain | CoA-binding | NAD(P)-binding domain | Succinyl-CoA ligase, alpha subunit | Succinyl-CoA synthetase, beta subunit, conserved site | Succinyl-CoA synthetase-like
1.85681	1.15164	AT2G16970	Major facilitator superfamily protein	maternal effect embryo arrest 15 (MEE15); FUNCTIONS IN: tetracycline transporter activity; INVOLVED IN: embryo development ending in seed dormancy; LOCATED IN: integral to membrane; EXPRESSED IN: 22 plant structures; EXPRESSED DURING: 13 growth stages; CONTAINS InterPro DOMAIN/s: Tetracycline resistance protein, TetA (InterPro:IPR001958), Major facilitator superfamily MFS-1 (InterPro:IPR011701), …	Major facilitator superfamily | Major facilitator superfamily domain, general substrate transporter | Tetracycline resistance protein, TetA/multidrug resistance protein MdtG
2.23534	1.14939	AT5G16900	Leucine-rich repeat protein kinase family protein	Leucine-rich repeat protein kinase family protein; FUNCTIONS IN: kinase activity; INVOLVED IN: protein amino acid phosphorylation; LOCATED IN: endomembrane system; EXPRESSED IN: embryo, leaf whorl, sperm cell, sepal, root; EXPRESSED DURING: petal differentiation and expansion stage, D bilateral stage; CONTAINS InterPro DOMAIN/s: Protein kinase, ATP binding site (InterPro:IPR017441), Protein kinas…	Concanavalin A-like lectin/glucanase, subgroup | Leucine-rich repeat | Malectin-like carbohydrate-binding domain | Protein kinase domain | Protein kinase, ATP binding site | Protein kinase-like domain | Serine/threonine-protein kinase, active site
1.37186	1.14852	AT3G54930	Protein phosphatase 2A regulatory B subunit family protein	Protein phosphatase 2A regulatory B subunit family protein; FUNCTIONS IN: protein phosphatase type 2A regulator activity; INVOLVED IN: signal transduction; LOCATED IN: chloroplast, protein phosphatase type 2A complex; EXPRESSED IN: 16 plant structures; EXPRESSED DURING: 10 growth stages; CONTAINS InterPro DOMAIN/s: Protein phosphatase 2A, regulatory B subunit, B56 (InterPro:IPR002554); BEST Arabi…	Armadillo-type fold | Protein phosphatase 2A, regulatory B subunit, B56
1.02737	1.12578	AT2G47750	putative indole-3-acetic acid-amido synthetase GH3.9	putative indole-3-acetic acid-amido synthetase GH3.9 (GH3.9); FUNCTIONS IN: molecular_function unknown; INVOLVED IN: response to auxin stimulus; LOCATED IN: chloroplast envelope; EXPRESSED IN: 18 plant structures; EXPRESSED DURING: 9 growth stages; CONTAINS InterPro DOMAIN/s: GH3 auxin-responsive promoter (InterPro:IPR004993); BEST Arabidopsis thaliana protein match is: Auxin-responsive GH3 famil…	GH3 auxin-responsive promoter
1.05431	1.12087	AT5G19390	Rho GTPase activation protein (RhoGAP) with PH domain	Rho GTPase activation protein (RhoGAP) with PH domain; FUNCTIONS IN: Rho GTPase activator activity, phosphoinositide binding; INVOLVED IN: signal transduction; LOCATED IN: chloroplast thylakoid membrane; EXPRESSED IN: guard cell, cultured cell; CONTAINS InterPro DOMAIN/s: Pleckstrin homology-type (InterPro:IPR011993), Rho GTPase activation protein (InterPro:IPR008936), Pleckstrin homology (InterP…	Pleckstrin homology domain | Pleckstrin homology-like domain | Rho GTPase activation protein | Rho GTPase-activating protein domain | Ternary complex factor MIP1, leucine-zipper
1.88239	1.11482	AT5G65090	DNAse I-like superfamily protein	BRISTLED 1 (BST1); FUNCTIONS IN: hydrolase activity, inositol or phosphatidylinositol phosphatase activity; INVOLVED IN: root epidermal cell differentiation, root hair cell differentiation, cell tip growth; LOCATED IN: cellular_component unknown; EXPRESSED IN: 11 plant structures; EXPRESSED DURING: L mature pollen stage, M germinated pollen stage, 4 anthesis, petal differentiation and expansion s…	Endonuclease/exonuclease/phosphatase | Inositol polyphosphate-related phosphatase
1.40556	1.11285	AT5G06220	LETM1-like protein	LETM1-like protein; FUNCTIONS IN: molecular_function unknown; INVOLVED IN: biological_process unknown; LOCATED IN: cellular_component unknown; CONTAINS InterPro DOMAIN/s: LETM1-like (InterPro:IPR011685); BEST Arabidopsis thaliana protein match is: LETM1-like protein (TAIR:AT3G11560.4)	LETM1-like
1.29191	1.10512	AT3G13290	varicose-related	varicose-related (VCR); FUNCTIONS IN: nucleotide binding; LOCATED IN: cellular_component unknown; EXPRESSED IN: male gametophyte, cultured cell, pollen tube; EXPRESSED DURING: L mature pollen stage, M germinated pollen stage; CONTAINS InterPro DOMAIN/s: WD40 repeat-like-containing domain (InterPro:IPR011046), WD40 repeat 2 (InterPro:IPR019782), WD40-repeat-containing domain (InterPro:IPR017986), …	WD40 repeat | WD40-repeat-containing domain | WD40/YVTN repeat-like-containing domain
1.45772	1.10168	AT2G39130	Transmembrane amino acid transporter family protein	Transmembrane amino acid transporter family protein; FUNCTIONS IN: amino acid transmembrane transporter activity; INVOLVED IN: biological_process unknown; LOCATED IN: plasma membrane; EXPRESSED IN: 24 plant structures; EXPRESSED DURING: 15 growth stages; CONTAINS InterPro DOMAIN/s: Amino acid transporter, transmembrane (InterPro:IPR013057); BEST Arabidopsis thaliana protein match is: Transmembran…	Amino acid transporter, transmembrane
1.166	1.09663	AT1G66050	Zinc finger (C3HC4-type RING finger) family protein	VARIANT IN METHYLATION 2 (VIM2); CONTAINS InterPro DOMAIN/s: Zinc finger, RING-type, conserved site (InterPro:IPR017907), Zinc finger, PHD-type, conserved site (InterPro:IPR019786), Zinc finger, RING-type (InterPro:IPR001841), Zinc finger, PHD-type (InterPro:IPR001965), SRA-YDG (InterPro:IPR003105), Zinc finger, C3HC4 RING-type (InterPro:IPR018957), Zinc finger, FYVE/PHD-type (InterPro:IPR011011)…	PUA-like domain | SRA-YDG | Zinc finger, C3HC4 RING-type | Zinc finger, FYVE/PHD-type | Zinc finger, PHD-type | Zinc finger, PHD-type, conserved site | Zinc finger, RING-type | Zinc finger, RING-type, conserved site | Zinc finger, RING/FYVE/PHD-type
1.53703	1.09617	AT1G53990	GDSL-motif lipase 3	GDSL-motif lipase 3 (GLIP3); FUNCTIONS IN: lipase activity, carboxylesterase activity; INVOLVED IN: glycerol biosynthetic process, lipid metabolic process; LOCATED IN: endomembrane system; EXPRESSED IN: root; CONTAINS InterPro DOMAIN/s: Lipase, GDSL, active site (InterPro:IPR008265), Lipase, GDSL (InterPro:IPR001087), Esterase, SGNH hydrolase-type (InterPro:IPR013830); BEST Arabidopsis thaliana p…	Lipase, GDSL | Lipase, GDSL, active site | SGNH hydrolase-type esterase domain
1.63129	1.08706	AT5G36870	glucan synthase-like 9	glucan synthase-like 9 (GSL09); FUNCTIONS IN: 1,3-beta-glucan synthase activity; INVOLVED IN: 1,3-beta-glucan biosynthetic process; LOCATED IN: 1,3-beta-glucan synthase complex, membrane; EXPRESSED IN: shoot apex, petal, root, flower, leaf; EXPRESSED DURING: petal differentiation and expansion stage; CONTAINS InterPro DOMAIN/s: Glycosyl transferase, family 48 (InterPro:IPR003440); BEST Arabidopsi…	1,3-beta-glucan synthase subunit FKS1-like, domain-1 | Callose synthase | Glycosyl transferase, family 48
1.17329	1.08653	AT5G55760	sirtuin 1	sirtuin 1 (SRT1); FUNCTIONS IN: NAD binding, DNA binding, zinc ion binding, hydrolase activity, acting on carbon-nitrogen (but not peptide) bonds, in linear amides; INVOLVED IN: protein amino acid deacetylation, chromatin silencing, regulation of transcription, DNA-dependent, regulation of transcription; LOCATED IN: chromatin silencing complex; EXPRESSED IN: 23 plant structures; EXPRESSED DURING:…	DHS-like NAD/FAD-binding domain | Sirtuin family | Sirtuin family, catalytic core domain
1.6042	1.07284	AT3G27580	Protein kinase superfamily protein	ATPK7; FUNCTIONS IN: protein serine/threonine kinase activity, kinase activity; INVOLVED IN: protein amino acid phosphorylation; LOCATED IN: chloroplast; EXPRESSED IN: 22 plant structures; EXPRESSED DURING: 13 growth stages; CONTAINS InterPro DOMAIN/s: Protein kinase, catalytic domain (InterPro:IPR000719), Serine/threonine-protein kinase domain (InterPro:IPR002290), Tyrosine-protein kinase, catal…	Protein kinase domain | Protein kinase-like domain | Serine/threonine-protein kinase, active site | Serine/threonine/dual specificity protein kinase, catalytic domain
1.83684	1.07035	AT2G02610	Cysteine/Histidine-rich C1 domain family protein	Cysteine/Histidine-rich C1 domain family protein; CONTAINS InterPro DOMAIN/s: DC1 (InterPro:IPR004146), C1-like (InterPro:IPR011424); BEST Arabidopsis thaliana protein match is: Cysteine/Histidine-rich C1 domain family protein (TAIR:AT2G02640.1)	C1-like | DC1
1.83021	1.05689	AT1G35250	Thioesterase superfamily protein	Thioesterase superfamily protein; CONTAINS InterPro DOMAIN/s: Thioesterase superfamily (InterPro:IPR006683); BEST Arabidopsis thaliana protein match is: Thioesterase superfamily protein (TAIR:AT1G35290.1)	HotDog domain
1.25615	1.04964	AT3G08800	ARM repeat superfamily protein	ARM repeat superfamily protein; FUNCTIONS IN: binding; INVOLVED IN: biological_process unknown; LOCATED IN: cellular_component unknown; EXPRESSED IN: 12 plant structures; EXPRESSED DURING: 7 growth stages; CONTAINS InterPro DOMAIN/s: Armadillo-like helical (InterPro:IPR011989), Armadillo-type fold (InterPro:IPR016024)	Armadillo-like helical | Armadillo-type fold
1.10698	1.04267	AT5G18680	tubby like protein 11	tubby like protein 11 (TLP11); CONTAINS InterPro DOMAIN/s: F-box domain, cyclin-like (InterPro:IPR001810), Tubby, C-terminal, conserved site (InterPro:IPR018066), Tubby, C-terminal (InterPro:IPR000007); BEST Arabidopsis thaliana protein match is: tubby-like protein 9 (TAIR:AT3G06380.1)	F-box domain | Tubby C-terminal-like domain | Tubby, C-terminal | Tubby, C-terminal, conserved site
1.00869	1.04018	AT2G26170	cytochrome P450, family 711, subfamily A, polypeptide 1	cytochrome P450, family 711, subfamily A, polypeptide 1 (CYP711A1); FUNCTIONS IN: electron carrier activity, monooxygenase activity, iron ion binding, oxygen binding, heme binding; INVOLVED IN: carotenoid biosynthetic process, positive regulation of flavonoid biosynthetic process, regulation of meristem structural organization, secondary shoot formation, auxin polar transport; EXPRESSED IN: 23 pl…	Cytochrome P450 | Cytochrome P450, E-class, group I | Cytochrome P450, conserved site
1.28417	1.03805	AT1G61480	S-locus lectin protein kinase family protein	S-locus lectin protein kinase family protein; FUNCTIONS IN: in 6 functions; INVOLVED IN: protein amino acid phosphorylation, recognition of pollen; LOCATED IN: endomembrane system; EXPRESSED IN: root; CONTAINS InterPro DOMAIN/s: Curculin-like (mannose-binding) lectin (InterPro:IPR001480), Apple-like (InterPro:IPR003609), Protein kinase, ATP binding site (InterPro:IPR017441), PAN-2 domain (InterPr…	Apple-like | Bulb-type lectin domain | Concanavalin A-like lectin/glucanase, subgroup | Epidermal growth factor-like domain | PAN-2 domain | Protein kinase domain | Protein kinase, ATP binding site | Protein kinase-like domain | S-locus glycoprotein | S-locus receptor kinase, C-terminal | S-receptor-like serine/threonine-protein kinase | Serine-threonine/tyrosine-protein kinase catalytic domain |…
1.24787	1.0207	AT3G42860	zinc knuckle (CCHC-type) family protein	zinc knuckle (CCHC-type) family protein; FUNCTIONS IN: zinc ion binding, nucleic acid binding; INVOLVED IN: biological_process unknown; LOCATED IN: cellular_component unknown; EXPRESSED IN: shoot apex, embryo, flower, seed; EXPRESSED DURING: petal differentiation and expansion stage, E expanded cotyledon stage, D bilateral stage; CONTAINS InterPro DOMAIN/s: Zinc finger, CCHC-type (InterPro:IPR001…	Zinc finger, CCHC-type | Zinc finger, GRF-type
1.01594	1.0173	AT1G08620	Transcription factor jumonji (jmj) family protein / zinc finger (C5HC2 type) family protein	PKDM7D; FUNCTIONS IN: sequence-specific DNA binding transcription factor activity; INVOLVED IN: regulation of transcription; LOCATED IN: nucleus; EXPRESSED IN: 23 plant structures; EXPRESSED DURING: 15 growth stages; CONTAINS InterPro DOMAIN/s: Transcription factor jumonji/aspartyl beta-hydroxylase (InterPro:IPR003347), FY-rich, C-terminal (InterPro:IPR003889), FY-rich, N-terminal (InterPro:IPR00…	FY-rich, C-terminal | FY-rich, N-terminal | JmjC domain | Transcription factor jumonji, JmjN | Zinc finger, C5HC2-type
1.09561	1.00925	AT3G17340	ARM repeat superfamily protein	ARM repeat superfamily protein; FUNCTIONS IN: protein transporter activity, binding; INVOLVED IN: intracellular protein transport, protein import into nucleus, docking; LOCATED IN: nucleus, nuclear pore, cytoplasm; EXPRESSED IN: 20 plant structures; EXPRESSED DURING: 10 growth stages; CONTAINS InterPro DOMAIN/s: Importin-beta, N-terminal (InterPro:IPR001494), Armadillo-like helical (InterPro:IPR0…	Armadillo-like helical | Armadillo-type fold | Importin-beta, N-terminal domain
1.70721	1.00499	AT5G34940	glucuronidase 3	glucuronidase 3 (GUS3); FUNCTIONS IN: beta-glucuronidase activity; INVOLVED IN: biological_process unknown; LOCATED IN: plant-type cell wall; EXPRESSED IN: 22 plant structures; EXPRESSED DURING: 11 growth stages; CONTAINS InterPro DOMAIN/s: Glycoside hydrolase family 79, N-terminal (InterPro:IPR005199); BEST Arabidopsis thaliana protein match is: glucuronidase 1 (TAIR:AT5G61250.1); BEST Arabidops…	Glycoside hydrolase, family 79 | Glycoside hydrolase, superfamily
1.05822	1.00195	AT1G34120	inositol polyphosphate 5-phosphatase I	MYO-INOSITOL POLYPHOSPHATE 5-PHOSPHATASE 1 (AT5PTASE1); inositol polyphosphate 5-phosphatase I (IP5PI); CONTAINS InterPro DOMAIN/s: Inositol polyphosphate related phosphatase (InterPro:IPR000300), Endonuclease/exonuclease/phosphatase (InterPro:IPR005135); BEST Arabidopsis thaliana protein match is: DNAse I-like superfamily protein (TAIR:AT1G71710.1); BEST Arabidopsis thaliana protein match is: DN…	Endonuclease/exonuclease/phosphatase | Inositol polyphosphate-related phosphatase
1.33826	1.00038	AT5G54040	Cysteine/Histidine-rich C1 domain family protein	Cysteine/Histidine-rich C1 domain family protein; INVOLVED IN: intracellular signaling pathway; LOCATED IN: cellular_component unknown; EXPRESSED IN: stem, hypocotyl, root; CONTAINS InterPro DOMAIN/s: Protein kinase C-like, phorbol ester/diacylglycerol binding (InterPro:IPR002219), DC1 (InterPro:IPR004146), C1-like (InterPro:IPR011424); BEST Arabidopsis thaliana protein match is: Cysteine/Histidi…	C1-like | DC1 | Protein kinase C-like, phorbol ester/diacylglycerol-binding domain

## Sheet: GO_Share_Up_C
Term Name	GOID	Term Type	Depth	cnt(reference)	cnt(GO_DEG_up)	fsh(GO_DEG_up)
nuclear replisome	GO:0043601	C	5	3	2	6.73841e-05
nuclear replication fork	GO:0043596	C	6	3	2	6.73841e-05
replisome	GO:0030894	C	4	3	2	6.73841e-05
protein complex	GO:0043234	C	3	1104	16	8.05511e-05
replication fork	GO:0005657	C	5	8	2	0.000619133
1,3-beta-D-glucan synthase complex	GO:0000148	C	4	12	2	0.00144122
plasma membrane part	GO:0044459	C	4	218	5	0.00399665
MCM complex	GO:0042555	C	4	1	1	0.00476162
minus-end kinesin complex	GO:0005872	C	6	1	1	0.00476162
membrane part	GO:0044425	C	3	1255	13	0.00721186
nuclear chromosome part	GO:0044454	C	5	29	2	0.00840789
macromolecular complex	GO:0032991	C	2	1736	16	0.00886106
protein-DNA complex	GO:0032993	C	3	30	2	0.0089805
epsilon DNA polymerase complex	GO:0008622	C	5	2	1	0.00950071
kinesin complex	GO:0005871	C	5	2	1	0.00950071
chromatin silencing complex	GO:0005677	C	5	2	1	0.00950071
nucleotide-excision repair complex	GO:0000109	C	4	2	1	0.00950071
nuclear chromosome	GO:0000228	C	5	36	2	0.0127663
cellular_component	GO:0005575	C	1	22522	120	0.0177174
ubiquitin ligase complex	GO:0000151	C	4	218	4	0.0206835
nucleus	GO:0005634	C	5	2435	19	0.0230266
DNA polymerase complex	GO:0042575	C	4	5	1	0.0235838
citrate lyase complex	GO:0009346	C	4	5	1	0.0235838
anaphase-promoting complex	GO:0005680	C	6	7	1	0.0328619
intrinsic to membrane	GO:0031224	C	4	795	8	0.037082
heterotrimeric G-protein complex	GO:0005834	C	4	66	2	0.0396271
extrinsic to internal side of plasma membrane	GO:0031234	C	4	67	2	0.0407215
extrinsic to plasma membrane	GO:0019897	C	5	68	2	0.0418272
microtubule associated complex	GO:0005875	C	4	9	1	0.0420523
ESCRT III complex	GO:0000815	C	4	9	1	0.0420523
cullin-RING ubiquitin ligase complex	GO:0031461	C	5	163	3	0.0432368
internal side of plasma membrane	GO:0009898	C	5	70	2	0.0440721
nuclear ubiquitin ligase complex	GO:0000152	C	5	10	1	0.0466149

## Sheet: GO_Share_Up_F
Term Name	GOID	Term Type	Depth	cnt(reference)	cnt(GO_DEG_up)	fsh(GO_DEG_up)
molecular_function	GO:0003674	F	1	25254	143	4.83073e-06
hydrolase activity, acting on ester bonds	GO:0016788	F	4	996	16	2.38292e-05
thiolester hydrolase activity	GO:0016790	F	5	75	5	3.03233e-05
antibiotic transporter activity	GO:0042895	F	5	5	2	0.000223208
tetracycline transporter activity	GO:0008493	F	6	5	2	0.000223208
hydrolase activity	GO:0016787	F	3	2932	27	0.000676958
motor activity	GO:0003774	F	8	86	4	0.000776157
ubiquitin thiolesterase activity	GO:0004221	F	6	43	3	0.00113693
1,3-beta-D-glucan synthase activity	GO:0003843	F	7	12	2	0.00144122
histone-lysine N-methyltransferase activity	GO:0018024	F	8	17	2	0.00292373
lysine N-methyltransferase activity	GO:0016278	F	7	18	2	0.00327895
protein-lysine N-methyltransferase activity	GO:0016279	F	7	18	2	0.00327895
inulinase activity	GO:0051670	F	6	1	1	0.00476162
lactate transmembrane transporter activity	GO:0015129	F	8	1	1	0.00476162
arylesterase activity	GO:0004064	F	6	1	1	0.00476162
minus-end-directed microtubule motor activity	GO:0008569	F	10	1	1	0.00476162
phosphatidylinositol-5-phosphate binding	GO:0010314	F	6	1	1	0.00476162
single-stranded DNA binding	GO:0003697	F	6	22	2	0.00488918
catalytic activity	GO:0003824	F	2	8211	54	0.00497122
histone methyltransferase activity	GO:0042054	F	7	25	2	0.00629052
carboxylesterase activity	GO:0004091	F	5	348	6	0.00661595
nucleotide binding	GO:0000166	F	3	2159	19	0.00718041
binding	GO:0005488	F	2	9160	58	0.00789798
UDP-glucosyltransferase activity	GO:0035251	F	6	88	3	0.00865065
signal transducer activity	GO:0004871	F	3	374	6	0.0092536
molecular transducer activity	GO:0060089	F	2	374	6	0.0092536
histidinol-phosphate transaminase activity	GO:0004400	F	6	2	1	0.00950071
hedgehog receptor activity	GO:0008158	F	6	2	1	0.00950071
levanase activity	GO:0031219	F	6	2	1	0.00950071
N-methyltransferase activity	GO:0008170	F	6	33	2	0.0107994
inositol or phosphatidylinositol phosphatase activity	GO:0004437	F	7	34	2	0.0114388
metal ion binding	GO:0046872	F	5	2273	19	0.0120177
beta-glucuronidase activity	GO:0004566	F	6	3	1	0.0142174
NAD+ binding	GO:0070403	F	5	3	1	0.0142174
protein methyltransferase activity	GO:0008276	F	6	40	2	0.0156112
inositol-polyphosphate 5-phosphatase activity	GO:0004445	F	9	4	1	0.0189117
zinc ion binding	GO:0008270	F	7	1284	12	0.0202161
cation binding	GO:0043169	F	4	2405	19	0.0205517
ion binding	GO:0043167	F	3	2406	19	0.0206307
substrate-specific channel activity	GO:0022838	F	5	122	3	0.0207111
passive transmembrane transporter activity	GO:0022803	F	4	123	3	0.0211564
channel activity	GO:0015267	F	5	123	3	0.0211564
inositol trisphosphate phosphatase activity	GO:0046030	F	8	5	1	0.0235838
transcription regulatory region DNA binding	GO:0044212	F	6	5	1	0.0235838
regulatory region nucleic acid binding	GO:0001067	F	4	5	1	0.0235838
promoter binding	GO:0010843	F	6	5	1	0.0235838
regulatory region DNA binding	GO:0000975	F	5	5	1	0.0235838
cysteamine dioxygenase activity	GO:0047800	F	6	5	1	0.0235838
ATP citrate synthase activity	GO:0003878	F	6	5	1	0.0235838
structure-specific DNA binding	GO:0043566	F	5	50	2	0.0237717
GTPase activator activity	GO:0005096	F	4	51	2	0.0246658
glucosyltransferase activity	GO:0046527	F	6	134	3	0.026401
methyl jasmonate esterase activity	GO:0080032	F	6	6	1	0.0282339
sequence-specific DNA binding transcription factor activity	GO:0003700	F	3	1681	14	0.0302547
nucleic acid binding transcription factor activity	GO:0001071	F	2	1681	14	0.0302547
lipase activity	GO:0016298	F	5	143	3	0.0311622
DNA binding	GO:0003677	F	4	1530	13	0.0315223
palmitoyl-(protein) hydrolase activity	GO:0008474	F	6	7	1	0.0328619
monocarboxylic acid transmembrane transporter activity	GO:0008028	F	7	7	1	0.0328619
phosphatidylinositol binding	GO:0035091	F	5	63	2	0.0364135
transporter activity	GO:0005215	F	2	1249	11	0.0370888
methyl indole-3-acetate esterase activity	GO:0080030	F	6	8	1	0.037468
microtubule motor activity	GO:0003777	F	9	66	2	0.0396271
drug transmembrane transporter activity	GO:0015238	F	4	66	2	0.0396271
transition metal ion binding	GO:0046914	F	6	1913	15	0.0398909
transmembrane receptor activity	GO:0004888	F	5	159	3	0.0406592
ATP binding	GO:0005524	F	7	1428	12	0.0408128
adenyl nucleotide binding	GO:0030554	F	5	1434	12	0.0419077
adenyl ribonucleotide binding	GO:0032559	F	6	1434	12	0.0419077
Rho GTPase activator activity	GO:0005100	F	6	9	1	0.0420523
nucleotide-sugar transmembrane transporter activity	GO:0005338	F	6	10	1	0.0466149
enzyme activator activity	GO:0008047	F	3	75	2	0.0498739

## Sheet: GO_Share_Up_P
Term Name	GOID	Term Type	Depth	cnt(reference)	cnt(GO_DEG_up)	fsh(GO_DEG_up)
biological_process	GO:0008150	P	1	25320	142	1.66635e-05
cellular process	GO:0009987	P	2	11057	78	2.27804e-05
regulation of cellular process	GO:0050794	P	3	3150	32	3.10483e-05
biological regulation	GO:0065007	P	2	3960	37	4.06732e-05
cell cycle	GO:0007049	P	3	267	8	4.50885e-05
M phase of meiotic cell cycle	GO:0051327	P	5	52	4	0.000112172
meiosis	GO:0007126	P	5	52	4	0.000112172
cell cycle process	GO:0022402	P	3	160	6	0.000122925
cell cycle phase	GO:0022403	P	4	101	5	0.000125994
regulation of biological process	GO:0050789	P	2	3548	33	0.000127883
meiotic cell cycle	GO:0051321	P	4	75	4	0.000462612
M phase	GO:0000279	P	5	85	4	0.000742785
male meiosis	GO:0007140	P	6	11	2	0.00120478
beta-glucan metabolic process	GO:0051273	P	7	12	2	0.00144122
beta-glucan biosynthetic process	GO:0051274	P	8	12	2	0.00144122
1,3-beta-D-glucan biosynthetic process	GO:0006075	P	9	12	2	0.00144122
1,3-beta-D-glucan metabolic process	GO:0006074	P	8	12	2	0.00144122
protein modification process	GO:0006464	P	5	1731	18	0.0015627
cellular response to stimulus	GO:0051716	P	3	1620	17	0.00192021
nucleic acid metabolic process	GO:0090304	P	5	2581	23	0.00266772
nucleobase, nucleoside, nucleotide and nucleic acid metabolic process	GO:0006139	P	4	2903	25	0.00272893
regulation of primary metabolic process	GO:0080090	P	4	1823	18	0.00273643
regulation of nucleobase, nucleoside, nucleotide and nucleic acid metabolic process	GO:0019219	P	5	1697	17	0.00309829
cellular macromolecule metabolic process	GO:0044260	P	4	6047	43	0.00342976
regulation of cellular biosynthetic process	GO:0031326	P	5	1718	17	0.00350805
regulation of nitrogen compound metabolic process	GO:0051171	P	4	1718	17	0.00350805
regulation of cellular metabolic process	GO:0031323	P	4	1867	18	0.0035181
signal transduction	GO:0007165	P	3	1153	13	0.00360443
regulation of biosynthetic process	GO:0009889	P	4	1723	17	0.00361198
transcription, DNA-dependent	GO:0006351	P	5	1728	17	0.00371844
RNA biosynthetic process	GO:0032774	P	5	1730	17	0.00376175
macromolecule modification	GO:0043412	P	4	1905	18	0.00433527
regulation of transcription, DNA-dependent	GO:0006355	P	6	1622	16	0.00473646
S phase of mitotic cell cycle	GO:0000084	P	6	1	1	0.00476162
intracellular pH reduction	GO:0051452	P	10	1	1	0.00476162
anastral spindle assembly involved in male meiosis	GO:0009971	P	7	1	1	0.00476162
spindle assembly involved in male meiosis	GO:0007053	P	6	1	1	0.00476162
tetracycline transport	GO:0015904	P	6	1	1	0.00476162
positive regulation of cell fate commitment	GO:0010455	P	5	1	1	0.00476162
vacuolar acidification	GO:0007035	P	11	1	1	0.00476162
positive regulation of S phase of mitotic cell cycle	GO:0045750	P	5	1	1	0.00476162
regulation of S phase of mitotic cell cycle	GO:0007090	P	6	1	1	0.00476162
lactate transport	GO:0015727	P	7	1	1	0.00476162
positive regulation of mitotic cell cycle	GO:0045931	P	5	1	1	0.00476162
S phase	GO:0051320	P	5	1	1	0.00476162
pH reduction	GO:0045851	P	10	1	1	0.00476162
regulation of S phase	GO:0033261	P	5	1	1	0.00476162
anastral spindle assembly	GO:0055048	P	7	1	1	0.00476162
signaling	GO:0023052	P	2	1195	13	0.00485082
regulation of RNA metabolic process	GO:0051252	P	5	1632	16	0.00501914
regulation of metabolic process	GO:0019222	P	3	2110	19	0.00566271
regulation of cellular macromolecule biosynthetic process	GO:2000112	P	6	1671	16	0.00625657
regulation of macromolecule biosynthetic process	GO:0010556	P	5	1671	16	0.00625657
regulation of gene expression	GO:0010468	P	5	1822	17	0.0062567
cellular metabolic process	GO:0044237	P	3	8167	53	0.0072421
regulation of macromolecule metabolic process	GO:0060255	P	4	1898	17	0.00921503
macromolecule metabolic process	GO:0043170	P	3	6575	44	0.00931369
GDP-mannose transport	GO:0015784	P	5	2	1	0.00950071
regulation of intracellular pH	GO:0051453	P	9	2	1	0.00950071
spindle assembly involved in meiosis	GO:0090306	P	5	2	1	0.00950071
response to antibiotic	GO:0046677	P	4	2	1	0.00950071
embryo sac morphogenesis	GO:0048314	P	4	2	1	0.00950071
antibiotic transport	GO:0042891	P	5	2	1	0.00950071
regulation of cellular pH	GO:0030641	P	8	2	1	0.00950071
cellular nitrogen compound metabolic process	GO:0034641	P	4	3392	26	0.0101414
RNA metabolic process	GO:0016070	P	5	2266	19	0.0116603
nitrogen compound metabolic process	GO:0006807	P	3	3460	26	0.0128817
phosphate metabolic process	GO:0006796	P	5	1067	11	0.0134862
phosphorus metabolic process	GO:0006793	P	4	1068	11	0.013572
protein phosphorylation	GO:0006468	P	6	931	10	0.0140144
Golgi localization	GO:0051645	P	5	3	1	0.0142174
peroxisome localization	GO:0060151	P	5	3	1	0.0142174
inositol phosphate dephosphorylation	GO:0046855	P	6	3	1	0.0142174
phosphorylated carbohydrate dephosphorylation	GO:0046838	P	5	3	1	0.0142174
meiotic spindle organization	GO:0000212	P	4	3	1	0.0142174
negative regulation of long-day photoperiodism, flowering	GO:0048579	P	4	3	1	0.0142174
inositol phosphate catabolic process	GO:0071545	P	5	3	1	0.0142174
metabolic process	GO:0008152	P	2	10203	62	0.0143069
defense response	GO:0006952	P	4	796	9	0.0143415
primary metabolic process	GO:0044238	P	3	8286	52	0.0152528
mitochondrion localization	GO:0051646	P	5	4	1	0.0189117
regulation of pH	GO:0006885	P	9	4	1	0.0189117
spindle assembly	GO:0051225	P	6	4	1	0.0189117
regulation of cell fate commitment	GO:0010453	P	5	4	1	0.0189117
monocarboxylic acid transport	GO:0015718	P	7	4	1	0.0189117
organic alcohol transport	GO:0015850	P	5	4	1	0.0189117
response to X-ray	GO:0010165	P	6	4	1	0.0189117
protein methylation	GO:0006479	P	6	45	2	0.0195102
protein alkylation	GO:0008213	P	6	45	2	0.0195102
phosphorylation	GO:0016310	P	6	982	10	0.0195423
regulation of developmental process	GO:0050793	P	3	334	5	0.0221976
regulation of anatomical structure morphogenesis	GO:0022603	P	4	49	2	0.0228913
positive regulation of flavonoid biosynthetic process	GO:0009963	P	6	5	1	0.0235838
inositol trisphosphate metabolic process	GO:0032957	P	5	5	1	0.0235838
positive regulation of cell cycle	GO:0045787	P	4	5	1	0.0235838
positive regulation of cell differentiation	GO:0045597	P	4	5	1	0.0235838
female meiosis	GO:0007143	P	6	5	1	0.0235838
spindle organization	GO:0007051	P	5	6	1	0.0282339
organophosphate catabolic process	GO:0046434	P	4	6	1	0.0282339
regulation of long-day photoperiodism, flowering	GO:0048586	P	5	6	1	0.0282339
positive regulation of cell cycle process	GO:0090068	P	4	6	1	0.0282339
organelle assembly	GO:0070925	P	6	7	1	0.0328619
proanthocyanidin biosynthetic process	GO:0010023	P	7	7	1	0.0328619
organic anion transport	GO:0015711	P	6	7	1	0.0328619
fruit development	GO:0010154	P	5	503	6	0.0338405
cell maturation	GO:0048469	P	4	62	2	0.0353658
trichoblast maturation	GO:0048764	P	5	62	2	0.0353658
root hair cell differentiation	GO:0048765	P	6	62	2	0.0353658
reproductive process	GO:0022414	P	2	1088	10	0.0359054
cellular monovalent inorganic cation homeostasis	GO:0030004	P	7	8	1	0.037468
postreplication repair	GO:0006301	P	7	8	1	0.037468
histone H3-K4 methylation	GO:0051568	P	9	8	1	0.037468
embryo development ending in seed dormancy	GO:0009793	P	4	389	5	0.0389561
reproduction	GO:0000003	P	2	1107	10	0.039624
organic substance transport	GO:0071702	P	4	270	4	0.0406003
cellular cation homeostasis	GO:0030003	P	6	67	2	0.0407215
developmental growth	GO:0048589	P	3	271	4	0.0410616
trichoblast differentiation	GO:0010054	P	6	68	2	0.0418272
regulation of photoperiodism, flowering	GO:2000028	P	4	9	1	0.0420523
root system development	GO:0022622	P	5	274	4	0.0424633
root development	GO:0048364	P	5	274	4	0.0424633
positive regulation of cellular process	GO:0048522	P	3	162	3	0.0425849
glucan biosynthetic process	GO:0009250	P	7	69	2	0.0429441
flavonoid biosynthetic process	GO:0009813	P	6	71	2	0.0452111
inositol phosphate metabolic process	GO:0043647	P	4	10	1	0.0466149
histidine family amino acid biosynthetic process	GO:0009076	P	6	10	1	0.0466149
histidine biosynthetic process	GO:0000105	P	6	10	1	0.0466149
response to stimulus	GO:0050896	P	2	4457	29	0.0489293

## Sheet: Share_Down
M_logFC	BC_logFC	geneID	description	comp_description	IPR_domain
-2.41572	-1.30109	AT3G27940	LOB domain-containing protein 26	LOB domain-containing protein 26 (LBD26); INVOLVED IN: biological_process unknown; LOCATED IN: cellular_component unknown; EXPRESSED IN: leaf; CONTAINS InterPro DOMAIN/s: Lateral organ boundaries, LOB (InterPro:IPR004883); BEST Arabidopsis thaliana protein match is: LOB domain-containing protein 10 (TAIR:AT2G23660.2)	Lateral organ boundaries, LOB
-2.24852	-1.76944	AT5G52070	Agenet domain-containing protein	Agenet domain-containing protein; FUNCTIONS IN: RNA binding; INVOLVED IN: biological_process unknown; LOCATED IN: cellular_component unknown; EXPRESSED IN: 22 plant structures; EXPRESSED DURING: 13 growth stages; CONTAINS InterPro DOMAIN/s: Tudor-like, plant (InterPro:IPR014002), Agenet (InterPro:IPR008395); BEST Arabidopsis thaliana protein match is: Agenet domain-containing protein (TAIR:AT5G42…	Agenet-like domain | Tudor-like, plant
-2.14014	-1.72333	AT1G43590	transposable element gene	similar to unknown protein [Arabidopsis thaliana] (TAIR:AT5G34838.1); similar to hypothetical protein 24.t00017 [Brassica oleracea] (GB:ABD64939.1); contains InterPro domain Protein of unknown function DUF635; (InterPro:IPR006912)	Harbinger transposase-derived protein, plant
-2.07407	-1.3303	AT1G68050	flavin-binding, kelch repeat, f box 1	flavin-binding, kelch repeat, f box 1 (FKF1); FUNCTIONS IN: ubiquitin-protein ligase activity, signal transducer activity; INVOLVED IN: response to blue light, positive regulation of flower development, circadian rhythm, ubiquitin-dependent protein catabolic process, regulation of transcription; LOCATED IN: cellular_component unknown; EXPRESSED IN: whole plant, root tip, male gametophyte, leaf, p…	F-box domain | Kelch repeat type 2 | Kelch-type beta propeller | PAC motif | PAS domain
-1.86863	-1.28026	AT4G27657		unknown protein; FUNCTIONS IN: molecular_function unknown; INVOLVED IN: biological_process unknown; LOCATED IN: endomembrane system; EXPRESSED IN: 15 plant structures; EXPRESSED DURING: 9 growth stages; BEST Arabidopsis thaliana protein match is: unknown protein (TAIR:AT5G54145.1)
-1.54728	-1.04739	AT5G18130		unknown protein; BEST Arabidopsis thaliana protein match is: unknown protein (TAIR:AT3G03870.1); BEST Arabidopsis thaliana protein match is: unknown protein (TAIR:AT3G03870.2)
-1.37616	-1.00483	AT5G61380	CCT motif -containing response regulator protein	TIMING OF CAB EXPRESSION 1 (TOC1); CONTAINS InterPro DOMAIN/s: CheY-like (InterPro:IPR011006), Signal transduction response regulator, receiver domain (InterPro:IPR001789), CCT domain (InterPro:IPR010402); BEST Arabidopsis thaliana protein match is: pseudo-response regulator 3 (TAIR:AT5G60100.3)	CCT domain | CheY-like superfamily | Signal transduction response regulator, receiver domain
-1.34964	-1.26039	AT3G26740	CCR-like	CCR-like (CCL); FUNCTIONS IN: molecular_function unknown; INVOLVED IN: biological_process unknown; LOCATED IN: chloroplast; EXPRESSED IN: 23 plant structures; EXPRESSED DURING: 13 growth stages; CONTAINS InterPro DOMAIN/s: Light regulated Lir1 (InterPro:IPR009856)	Light regulated Lir1
-1.28895	-1.16422	AT5G19220	ADP glucose pyrophosphorylase large subunit 1	ADP glucose pyrophosphorylase large subunit 1 (APL1); FUNCTIONS IN: glucose-1-phosphate adenylyltransferase activity; INVOLVED IN: cellulose biosynthetic process, biosynthetic process, glycogen biosynthetic process; LOCATED IN: chloroplast, chloroplast stroma, chloroplast envelope; EXPRESSED IN: 26 plant structures; EXPRESSED DURING: 14 growth stages; CONTAINS InterPro DOMAIN/s: Glucose-1-phospha…	ADP-glucose pyrophosphorylase, conserved site | Glucose-1-phosphate adenylyltransferase | Nucleotide-diphospho-sugar transferases | Nucleotidyl transferase | Trimeric LpxA-like
-1.27704	-1.08604	AT2G29630	thiaminC	thiaminC (THIC); CONTAINS InterPro DOMAIN/s: Thiamine biosynthesis protein ThiC (InterPro:IPR002817); FUNCTIONS IN: iron-sulfur cluster binding, catalytic activity, ADP-ribose pyrophosphohydrolase activity; INVOLVED IN: response to vitamin B1, detection of bacterium, thiamin biosynthetic process; LOCATED IN: chloroplast stroma, chloroplast, plastid; LOCATED IN: chloroplast, chloroplast stroma, pl…	ThiC-associated domain | Thiamine biosynthesis protein ThiC
-1.23295	-1.10923	AT4G11370	RING-H2 finger A1A	RING-H2 finger A1A (RHA1A); FUNCTIONS IN: zinc ion binding; EXPRESSED IN: 21 plant structures; EXPRESSED DURING: 13 growth stages; CONTAINS InterPro DOMAIN/s: Zinc finger, RING-type (InterPro:IPR001841), Zinc finger, C3HC4 RING-type (InterPro:IPR018957); BEST Arabidopsis thaliana protein match is: RING-H2 finger A1B (TAIR:AT4G11360.1)	Zinc finger, RING-type | Zinc finger, RING/FYVE/PHD-type
-1.2154	-1.22816	AT5G48250	B-box type zinc finger protein with CCT domain	B-box type zinc finger protein with CCT domain; FUNCTIONS IN: sequence-specific DNA binding transcription factor activity, zinc ion binding; LOCATED IN: plasma membrane; EXPRESSED IN: 23 plant structures; EXPRESSED DURING: 13 growth stages; CONTAINS InterPro DOMAIN/s: CCT domain (InterPro:IPR010402), Zinc finger, B-box (InterPro:IPR000315); BEST Arabidopsis thaliana protein match is: CONSTANS-lik…	CCT domain | Zinc finger, B-box
-1.17695	-1.40767	AT4G32340	Tetratricopeptide repeat (TPR)-like superfamily protein	Tetratricopeptide repeat (TPR)-like superfamily protein; BEST Arabidopsis thaliana protein match is: Tetratricopeptide repeat (TPR)-like superfamily protein (TAIR:AT1G80130.1)	Tetratricopeptide-like helical domain
-1.05354	-1.05061	AT4G17140	pleckstrin homology (PH) domain-containing protein	pleckstrin homology (PH) domain-containing protein; FUNCTIONS IN: molecular_function unknown; INVOLVED IN: biological_process unknown; EXPRESSED IN: 23 plant structures; LOCATED IN: vacuole; EXPRESSED DURING: 13 growth stages; EXPRESSED IN: 24 plant structures; CONTAINS InterPro DOMAIN/s: Pleckstrin homology-type (InterPro:IPR011993), Protein of unknown function DUF946 (InterPro:IPR009291), Pleck…
