# Supplementary material for: A Genetic Screen Identifies PRP18a, a Putative Second Step Splicing Factor Important for Alternative Splicing and a Normal Phenotype in Arabidopsis thaliana
Source: G3 (Bethesda). 2018 Feb 27;8(4):1367–77. doi: 10.1534/g3.118.200022 (PMC5873924; doi:10.1534/g3.118.200022)
Supplement: Supplementary file 6 [file 1367TableS2.xlsx]

## Sheet: info
	# of introns	# of genes
Share_IR	1409	1322
Share_MES	96	89

## Sheet: Share_IR
M_foldChange	BC_foldChange	GeneID	intronNo	intronLength	T	prp18a-1	description	comp_description	IPR_domain
3.21591	2.39486	AT1G01020	7	91	GTAG	GTAG	Arv1-like protein	ARV1; CONTAINS InterPro DOMAIN/s: Arv1-like protein (InterPro:IPR007290); BEST Arabidopsis thaliana protein match is: Arv1-like protein (TAIR:AT4G01510.1)	Arv1 protein
3.92202	6.11224	AT1G01020	8	106	GTAG	GTAG	Arv1-like protein	ARV1; CONTAINS InterPro DOMAIN/s: Arv1-like protein (InterPro:IPR007290); BEST Arabidopsis thaliana protein match is: Arv1-like protein (TAIR:AT4G01510.1)	Arv1 protein
16.7101	13.1881	AT1G01170	1	87	GCAG	GCAG	Protein of unknown function (DUF1138)	Protein of unknown function (DUF1138); FUNCTIONS IN: molecular_function unknown; INVOLVED IN: response to stress; LOCATED IN: membrane; LOCATED IN: mitochondrion, membrane; EXPRESSED IN: 23 plant structures; EXPRESSED DURING: 13 growth stages; CONTAINS InterPro DOMAIN/s: Protein of unknown function DUF1138 (InterPro:IPR009515); BEST Arabidopsis thaliana protein match is: Protein of unknown functi…	Protein of unknown function DUF1138
3.35188	2.55715	AT1G01320	1	86	GTAG	GTAG	Tetratricopeptide repeat (TPR)-like superfamily protein	Tetratricopeptide repeat (TPR)-like superfamily protein; FUNCTIONS IN: binding; LOCATED IN: cellular_component unknown; EXPRESSED IN: 24 plant structures; EXPRESSED DURING: 14 growth stages; CONTAINS InterPro DOMAIN/s: Tetratricopeptide-like helical (InterPro:IPR011990), Tetratricopeptide repeat-containing (InterPro:IPR013026), Tetratricopeptide repeat (InterPro:IPR019734); BEST Arabidopsis thali…	Clustered mitochondria protein, N-terminal | GSKIP domain | Tetratricopeptide repeat | Tetratricopeptide repeat-containing domain | Tetratricopeptide-like helical domain
6.71814	12.9997	AT1G01320	22	792	GTAG	GTAG	Tetratricopeptide repeat (TPR)-like superfamily protein	Tetratricopeptide repeat (TPR)-like superfamily protein; FUNCTIONS IN: binding; LOCATED IN: cellular_component unknown; EXPRESSED IN: 24 plant structures; EXPRESSED DURING: 14 growth stages; CONTAINS InterPro DOMAIN/s: Tetratricopeptide-like helical (InterPro:IPR011990), Tetratricopeptide repeat-containing (InterPro:IPR013026), Tetratricopeptide repeat (InterPro:IPR019734); BEST Arabidopsis thali…	Clustered mitochondria protein, N-terminal | GSKIP domain | Tetratricopeptide repeat | Tetratricopeptide repeat-containing domain | Tetratricopeptide-like helical domain
19.4876	12.1043	AT1G01320	20	166	GTAG	GTAG	Tetratricopeptide repeat (TPR)-like superfamily protein	Tetratricopeptide repeat (TPR)-like superfamily protein; FUNCTIONS IN: binding; LOCATED IN: cellular_component unknown; EXPRESSED IN: 24 plant structures; EXPRESSED DURING: 14 growth stages; CONTAINS InterPro DOMAIN/s: Tetratricopeptide-like helical (InterPro:IPR011990), Tetratricopeptide repeat-containing (InterPro:IPR013026), Tetratricopeptide repeat (InterPro:IPR019734); BEST Arabidopsis thali…	Clustered mitochondria protein, N-terminal | GSKIP domain | Tetratricopeptide repeat | Tetratricopeptide repeat-containing domain | Tetratricopeptide-like helical domain
4.07583	3.66657	AT1G01430	2	141	GTAG	GTAG	TRICHOME BIREFRINGENCE-LIKE 25	TRICHOME BIREFRINGENCE-LIKE 25 (TBL25); CONTAINS InterPro DOMAIN/s: Protein of unknown function DUF231, plant (InterPro:IPR004253); BEST Arabidopsis thaliana protein match is: TRICHOME BIREFRINGENCE-LIKE 26 (TAIR:AT4G01080.1)	PC-Esterase | PMR5 N-terminal domain
8.71598	5.38141	AT1G01710	2	92	GTAG	GTAG	Acyl-CoA thioesterase family protein	Acyl-CoA thioesterase family protein; FUNCTIONS IN: cyclic nucleotide binding, acyl-CoA thioesterase activity; INVOLVED IN: acyl-CoA metabolic process; LOCATED IN: peroxisome; EXPRESSED IN: 22 plant structures; EXPRESSED DURING: 14 growth stages; CONTAINS InterPro DOMAIN/s: Cyclic nucleotide-binding (InterPro:IPR000595), Cyclic nucleotide-binding-like (InterPro:IPR018490), Acyl-CoA thioesterase (…	Acyl-CoA thioesterase | Cyclic nucleotide-binding domain | Cyclic nucleotide-binding-like | HotDog domain | RmlC-like jelly roll fold
25.2579	26.4352	AT1G01760	5	78	GTAG	GTAG	adenosine deaminases;RNA binding;RNA binding;adenosine deaminases	adenosine deaminases;RNA binding;RNA binding;adenosine deaminases; FUNCTIONS IN: RNA binding, adenosine deaminase activity; INVOLVED IN: RNA processing; LOCATED IN: cellular_component unknown; CONTAINS InterPro DOMAIN/s: Adenosine deaminase/editase (InterPro:IPR002466)	Adenosine deaminase/editase
11.7574	12.1216	AT1G01820	5	75	GTAG	GTAG	peroxin 11c	peroxin 11c (PEX11C); CONTAINS InterPro DOMAIN/s: Peroxisomal biogenesis factor 11 (InterPro:IPR008733); BEST Arabidopsis thaliana protein match is: peroxin 11D (TAIR:AT2G45740.3)	Peroxisomal biogenesis factor 11
2.39927	2.57175	AT1G01910	3	215	GTAG	GTAG	P-loop containing nucleoside triphosphate hydrolases superfamily protein	P-loop containing nucleoside triphosphate hydrolases superfamily protein; FUNCTIONS IN: ATP binding; INVOLVED IN: anion transport; INVOLVED IN: cellular metal ion homeostasis, anion transport; LOCATED IN: endomembrane system, membrane; LOCATED IN: membrane; EXPRESSED IN: 24 plant structures; EXPRESSED DURING: 15 growth stages; BEST Arabidopsis thaliana protein match is: P-loop containing nucleosi…	Anion-transporting ATPase-like domain | Arsenical pump ATPase, ArsA/GET3 | Arsenical pump ATPase, ArsA/GET3, eukaryotic | P-loop containing nucleoside triphosphate hydrolase
3.99023	31.2766	AT1G01950	17	82	GTAG	GTAG	armadillo repeat kinesin 2	armadillo repeat kinesin 2 (ARK2); FUNCTIONS IN: microtubule motor activity, binding, ATP binding; INVOLVED IN: root development; LOCATED IN: chloroplast; EXPRESSED IN: 23 plant structures; EXPRESSED DURING: 13 growth stages; CONTAINS InterPro DOMAIN/s: Kinesin, motor region, conserved site (InterPro:IPR019821), Armadillo-like helical (InterPro:IPR011989), Armadillo (InterPro:IPR000225), Armadill…	Armadillo | Armadillo-like helical | Armadillo-type fold | Kinesin, motor domain | Kinesin, motor region, conserved site | Kinesin-like protein | P-loop containing nucleoside triphosphate hydrolase
7.1437	3.03356	AT1G02010	18	96	GCAG	GCAG	secretory 1A	secretory 1A (SEC1A); FUNCTIONS IN: protein transporter activity; INVOLVED IN: protein secretion, vesicle-mediated transport, vesicle docking involved in exocytosis; LOCATED IN: cellular_component unknown; CONTAINS InterPro DOMAIN/s: Sec1-like protein (InterPro:IPR001619); BEST Arabidopsis thaliana protein match is: Sec1/munc18-like (SM) proteins superfamily (TAIR:AT1G12360.1)	Sec1-like protein | Sec1-like, domain 2
4.8822	13.1624	AT1G02080	41	108	GTAG	GTAG	transcription regulators	transcription regulators; FUNCTIONS IN: transcription regulator activity; EXPRESSED IN: 25 plant structures; LOCATED IN: membrane; EXPRESSED DURING: 15 growth stages; CONTAINS InterPro DOMAIN/s: CCR4-Not complex component, Not1 (InterPro:IPR007196)	CCR4-Not complex component, Not1, C-terminal | CCR4-Not complex, Not1 subunit, domain of unknown function DUF3819
15.1687	6.38008	AT1G02080	32	79	GTAG	GTAG	transcription regulators	transcription regulators; FUNCTIONS IN: transcription regulator activity; EXPRESSED IN: 25 plant structures; LOCATED IN: membrane; EXPRESSED DURING: 15 growth stages; CONTAINS InterPro DOMAIN/s: CCR4-Not complex component, Not1 (InterPro:IPR007196)	CCR4-Not complex component, Not1, C-terminal | CCR4-Not complex, Not1 subunit, domain of unknown function DUF3819
4.99465	4.16972	AT1G02100	10	185	GTAG	GTAG	Leucine carboxyl methyltransferase	Leucine carboxyl methyltransferase; FUNCTIONS IN: methyltransferase activity; INVOLVED IN: biological_process unknown; LOCATED IN: cellular_component unknown; EXPRESSED IN: 22 plant structures; EXPRESSED DURING: 14 growth stages; CONTAINS InterPro DOMAIN/s: Leucine carboxyl methyltransferase, LCTM1 1 (InterPro:IPR016651), Leucine carboxyl methyltransferase, eukaryotic (InterPro:IPR021121), Leucin…	Leucine carboxyl methyltransferase | Leucine carboxyl methyltransferase 1, LCMT1 | S-adenosyl-L-methionine-dependent methyltransferase-like
9.1773	10.7802	AT1G02150	1	80	GTAG	GTAG	Tetratricopeptide repeat (TPR)-like superfamily protein	Tetratricopeptide repeat (TPR)-like superfamily protein; FUNCTIONS IN: binding; LOCATED IN: chloroplast; EXPRESSED IN: 22 plant structures; EXPRESSED DURING: 13 growth stages; CONTAINS InterPro DOMAIN/s: Pentatricopeptide repeat (InterPro:IPR002885), Tetratricopeptide-like helical (InterPro:IPR011990); BEST Arabidopsis thaliana protein match is: Pentatricopeptide repeat (PPR) superfamily protein …	Pentatricopeptide repeat | Tetratricopeptide-like helical domain
2.39553	3.83303	AT1G02280	4	224	GTAG	GTAG	translocon at the outer envelope membrane of chloroplasts 33	translocon at the outer envelope membrane of chloroplasts 33 (TOC33); FUNCTIONS IN: protein binding, GTP binding, GTPase activity, protein homodimerization activity; INVOLVED IN: protein targeting to chloroplast; LOCATED IN: chloroplast outer membrane, chloroplast; LOCATED IN: chloroplast outer membrane, chloroplast, chloroplast envelope; EXPRESSED IN: 23 plant structures; EXPRESSED DURING: 13 gr…	AIG1 | Chloroplast protein import component Toc34 | P-loop containing nucleoside triphosphate hydrolase
2.7571	2.57562	AT1G02305	4	110	GTAG	GTAG	Cysteine proteinases superfamily protein	Cysteine proteinases superfamily protein; FUNCTIONS IN: cysteine-type endopeptidase activity, cysteine-type peptidase activity; INVOLVED IN: proteolysis, regulation of catalytic activity; LOCATED IN: vacuole; EXPRESSED IN: 23 plant structures; EXPRESSED DURING: 15 growth stages; CONTAINS InterPro DOMAIN/s: Peptidase C1A, papain (InterPro:IPR013128), Peptidase C1A, cathepsin B (InterPro:IPR015643)…	Cysteine peptidase, cysteine active site | Cysteine peptidase, histidine active site | Peptidase C1A | Peptidase C1A, cathepsin B | Peptidase C1A, papain C-terminal | Peptidase C1A, propeptide
43.5747	10.9772	AT1G02470	5	526	GTAG	GTAG	Polyketide cyclase/dehydrase and lipid transport superfamily protein	Polyketide cyclase/dehydrase and lipid transport superfamily protein; FUNCTIONS IN: molecular_function unknown; INVOLVED IN: biological_process unknown; LOCATED IN: chloroplast; EXPRESSED IN: 10 plant structures; EXPRESSED DURING: 4 anthesis, C globular stage, petal differentiation and expansion stage; CONTAINS InterPro DOMAIN/s: Streptomyces cyclase/dehydrase (InterPro:IPR005031); BEST Arabidops…	START-like domain | Streptomyces cyclase/dehydrase
8.42266	5.15215	AT1G02475	3	103	GTAG	GTAG	Polyketide cyclase/dehydrase and lipid transport superfamily protein	Polyketide cyclase/dehydrase and lipid transport superfamily protein; FUNCTIONS IN: molecular_function unknown; INVOLVED IN: biological_process unknown; LOCATED IN: chloroplast; EXPRESSED IN: 22 plant structures; EXPRESSED DURING: 13 growth stages; CONTAINS InterPro DOMAIN/s: Streptomyces cyclase/dehydrase (InterPro:IPR005031); BEST Arabidopsis thaliana protein match is: Polyketide cyclase / dehy…	START-like domain | Streptomyces cyclase/dehydrase
19.6675	10.564	AT1G02560	8	131	GTAG	GTAG	nuclear encoded CLP protease 5	nuclear encoded CLP protease 5 (CLPP5); FUNCTIONS IN: serine-type endopeptidase activity; INVOLVED IN: peptidyl-cysteine S-nitrosylation; LOCATED IN: in 7 components; EXPRESSED IN: 23 plant structures; EXPRESSED DURING: 14 growth stages; CONTAINS InterPro DOMAIN/s: Peptidase S14, ClpP, active site (InterPro:IPR018215), Peptidase S14, ClpP (InterPro:IPR001907); BEST Arabidopsis thaliana protein ma…	ATP-dependent Clp protease proteolytic subunit | Clp protease proteolytic subunit /Translocation-enhancing protein TepA | ClpP, active site | ClpP/crotonase-like domain
3.12924	2.4765	AT1G02780	2	88	GTAG	GTAG	Ribosomal protein L19e family protein	embryo defective 2386 (emb2386); FUNCTIONS IN: structural constituent of ribosome; INVOLVED IN: translation, ribosome biogenesis, embryo development ending in seed dormancy; LOCATED IN: in 6 components; EXPRESSED IN: 25 plant structures; EXPRESSED DURING: 14 growth stages; CONTAINS InterPro DOMAIN/s: Ribosomal protein L19/L19e (InterPro:IPR000196), Ribosomal protein L19/L19e, domain 3 (InterPro:I…	Ribosomal protein L19/L19e | Ribosomal protein L19/L19e conserved site | Ribosomal protein L19/L19e domain | Ribosomal protein L19/L19e, domain 1 | Ribosomal protein L19/L19e, domain 3
15.3096	4.5995	AT1G02850	7	84	GTAG	GTAG	beta glucosidase 11	beta glucosidase 11 (BGLU11); FUNCTIONS IN: cation binding, hydrolase activity, hydrolyzing O-glycosyl compounds, catalytic activity; INVOLVED IN: carbohydrate metabolic process; LOCATED IN: endomembrane system; EXPRESSED IN: 24 plant structures; EXPRESSED DURING: 13 growth stages; CONTAINS InterPro DOMAIN/s: Glycoside hydrolase, family 1 (InterPro:IPR001360), Glycoside hydrolase, family 1, activ…	Glycoside hydrolase, catalytic domain | Glycoside hydrolase, family 1 | Glycoside hydrolase, family 1, active site | Glycoside hydrolase, superfamily
15.9364	24.1863	AT1G02890	1	89	GTAG	GTAG	AAA-type ATPase family protein	AAA-type ATPase family protein; FUNCTIONS IN: nucleoside-triphosphatase activity, ATPase activity, nucleotide binding, ATP binding; LOCATED IN: chloroplast; EXPRESSED IN: 25 plant structures; EXPRESSED DURING: 15 growth stages; CONTAINS InterPro DOMAIN/s: ATPase, AAA+ type, core (InterPro:IPR003593), ATPase, AAA-type, core (InterPro:IPR003959), ATPase, AAA-type, conserved site (InterPro:IPR003960…	AAA+ ATPase domain | ATPase, AAA-type, conserved site | ATPase, AAA-type, core | Forkhead-associated (FHA) domain | P-loop containing nucleoside triphosphate hydrolase | SMAD/FHA domain
10.5235	163.904	AT1G03260	8	211	GCAG	GCAG	SNARE associated Golgi protein family	SNARE associated Golgi protein family; LOCATED IN: endomembrane system; EXPRESSED IN: 24 plant structures; EXPRESSED DURING: 15 growth stages; CONTAINS InterPro DOMAIN/s: SNARE associated Golgi protein (InterPro:IPR015414); BEST Arabidopsis thaliana protein match is: SNARE associated Golgi protein family (TAIR:AT5G19070.1)	SNARE associated Golgi protein
4.84786	6.29937	AT1G03430	1	139	GTAG	GTAG	histidine-containing phosphotransfer factor 5	histidine-containing phosphotransfer factor 5 (AHP5); CONTAINS InterPro DOMAIN/s: Signal transduction histidine kinase, phosphotransfer (Hpt) domain (InterPro:IPR008207); BEST Arabidopsis thaliana protein match is: histidine-containing phosphotransmitter 2 (TAIR:AT3G29350.1)	Signal transduction histidine kinase, phosphotransfer (Hpt) domain
3.04626	3.01335	AT1G03470	2	105	GTAG	GTAG	Kinase interacting (KIP1-like) family protein	Kinase interacting (KIP1-like) family protein; CONTAINS InterPro DOMAIN/s: KIP1-like (InterPro:IPR011684); BEST Arabidopsis thaliana protein match is: Kinase interacting (KIP1-like) family protein (TAIR:AT2G47920.1)	KIP1-like
18.5374	13.6755	AT1G03860	4	402	GTAG	GTAG	prohibitin 2	prohibitin 2 (PHB2); INVOLVED IN: biological_process unknown; LOCATED IN: in 7 components; LOCATED IN: in 8 components; EXPRESSED IN: 30 plant structures; EXPRESSED DURING: 14 growth stages; CONTAINS InterPro DOMAIN/s: Prohibitin (InterPro:IPR000163), Band 7 protein (InterPro:IPR001107); BEST Arabidopsis thaliana protein match is: prohibitin 1 (TAIR:AT4G28510.1); BEST Arabidopsis thaliana protein…	Band 7 protein | Prohibitin
3.7521	4.58748	AT1G03960	11	148	GTAG	GTAG	Calcium-binding EF hand family protein	Calcium-binding EF hand family protein; FUNCTIONS IN: calcium ion binding; INVOLVED IN: biological_process unknown; LOCATED IN: cellular_component unknown; EXPRESSED IN: 22 plant structures; EXPRESSED DURING: 14 growth stages; CONTAINS InterPro DOMAIN/s: EF-Hand 1, calcium-binding site (InterPro:IPR018247), EF-HAND 2 (InterPro:IPR018249), EF-hand-like domain (InterPro:IPR011992); BEST Arabidopsis…	EF-Hand 1, calcium-binding site | EF-hand domain | EF-hand domain pair
24.7923	19.2307	AT1G04050	10	98	GTAG	GTAG	homolog of SU(var)3-9 1	homolog of SU(var)3-9 1 (SUVR1); FUNCTIONS IN: zinc ion binding, histone-lysine N-methyltransferase activity; INVOLVED IN: chromatin modification; LOCATED IN: nucleolus; EXPRESSED IN: 21 plant structures; EXPRESSED DURING: 14 growth stages; CONTAINS InterPro DOMAIN/s: SET domain (InterPro:IPR001214), WIYLD domain (InterPro:IPR018848), Pre-SET zinc-binding sub-group (InterPro:IPR003606), Pre-SET d…	Histone-lysine N-methyltransferase SUVR1/2/4 | Post-SET domain | Pre-SET domain | Pre-SET zinc-binding sub-group | SET domain | WIYLD domain
2.24622	2.18207	AT1G04080	4	350	GTCA	GTCA	Tetratricopeptide repeat (TPR)-like superfamily protein	PRP39; FUNCTIONS IN: binding; INVOLVED IN: regulation of timing of transition from vegetative to reproductive phase; LOCATED IN: intracellular; EXPRESSED IN: 28 plant structures; LOCATED IN: intracellular, nucleus; EXPRESSED DURING: 13 growth stages; CONTAINS InterPro DOMAIN/s: RNA-processing protein, HAT helix (InterPro:IPR003107); BEST Arabidopsis thaliana protein match is: Tetratricopeptide re…	HAT (Half-A-TPR) repeat | Tetratricopeptide-like helical domain
8.81918	13.2734	AT1G04200	3	93	GTAG	GTAG		FUNCTIONS IN: molecular_function unknown; INVOLVED IN: N-terminal protein myristoylation; LOCATED IN: cellular_component unknown; EXPRESSED IN: 22 plant structures; EXPRESSED DURING: 13 growth stages; CONTAINS InterPro DOMAIN/s: Dymeclin (InterPro:IPR019142)	Dymeclin
33.2135	22.9903	AT1G04340	3	91	GTAG	GTAG	HR-like lesion-inducing protein-related	HR-like lesion-inducing protein-related; FUNCTIONS IN: molecular_function unknown; INVOLVED IN: biological_process unknown; LOCATED IN: endomembrane system; EXPRESSED IN: 23 plant structures; EXPRESSED DURING: 15 growth stages; CONTAINS InterPro DOMAIN/s: HR-like lesion-inducer (InterPro:IPR008637); BEST Arabidopsis thaliana protein match is: HR-like lesion-inducing protein-related (TAIR:AT5G4346…	HR-like lesion-inducer
3.08396	5.08264	AT1G04440	11	90	GTAG	GTAG	casein kinase like 13	casein kinase like 13 (CKL13); FUNCTIONS IN: protein serine/threonine kinase activity, protein kinase activity, kinase activity, ATP binding; INVOLVED IN: protein amino acid phosphorylation; LOCATED IN: cellular_component unknown; EXPRESSED IN: 22 plant structures; EXPRESSED DURING: 12 growth stages; CONTAINS InterPro DOMAIN/s: Protein kinase, ATP binding site (InterPro:IPR017441), Protein kinase…	Protein kinase domain | Protein kinase, ATP binding site | Protein kinase-like domain | Serine/threonine-protein kinase, active site
5.97248	2.69735	AT1G04440	13	134	GTAG	GTAG	casein kinase like 13	casein kinase like 13 (CKL13); FUNCTIONS IN: protein serine/threonine kinase activity, protein kinase activity, kinase activity, ATP binding; INVOLVED IN: protein amino acid phosphorylation; LOCATED IN: cellular_component unknown; EXPRESSED IN: 22 plant structures; EXPRESSED DURING: 12 growth stages; CONTAINS InterPro DOMAIN/s: Protein kinase, ATP binding site (InterPro:IPR017441), Protein kinase…	Protein kinase domain | Protein kinase, ATP binding site | Protein kinase-like domain | Serine/threonine-protein kinase, active site
10.2001	11.4067	AT1G04710	4	88	GTAG	GTAG	peroxisomal 3-ketoacyl-CoA thiolase 4	peroxisomal 3-ketoacyl-CoA thiolase 4 (PKT4); FUNCTIONS IN: transferase activity, transferring acyl groups other than amino-acyl groups, catalytic activity, acetyl-CoA C-acyltransferase activity; INVOLVED IN: catechol catabolic process, ortho-cleavage, protocatechuate catabolic process, ortho-cleavage, metabolic process, fatty acid oxidation; LOCATED IN: peroxisome, vacuole; EXPRESSED IN: 23 plan…	Thiolase | Thiolase, C-terminal | Thiolase, N-terminal | Thiolase, active site | Thiolase, acyl-enzyme intermediate active site | Thiolase, conserved site | Thiolase-like | Thiolase-like, subgroup
9.54797	5.29286	AT1G04830	5	84	GTAG	GTAG	Ypt/Rab-GAP domain of gyp1p superfamily protein	Ypt/Rab-GAP domain of gyp1p superfamily protein; FUNCTIONS IN: RAB GTPase activator activity; INVOLVED IN: regulation of Rab GTPase activity; LOCATED IN: intracellular; EXPRESSED IN: 24 plant structures; EXPRESSED DURING: 15 growth stages; CONTAINS InterPro DOMAIN/s: RabGAP/TBC (InterPro:IPR000195); BEST Arabidopsis thaliana protein match is: Ypt/Rab-GAP domain of gyp1p superfamily protein (TAIR:…	Rab-GTPase-TBC domain
17.7637	30.6449	AT1G04850	8	260	GTAG	GTAG	ubiquitin-associated (UBA)/TS-N domain-containing protein	ubiquitin-associated (UBA)/TS-N domain-containing protein; FUNCTIONS IN: zinc ion binding; INVOLVED IN: biological_process unknown; LOCATED IN: intracellular; EXPRESSED IN: 24 plant structures; EXPRESSED DURING: 13 growth stages; CONTAINS InterPro DOMAIN/s: Zinc finger, C2H2-like (InterPro:IPR015880), Ubiquitin-associated/translation elongation factor EF1B, N-terminal (InterPro:IPR000449), Ubiqui…	PUB domain | PUG domain | UBA-like | Ubiquitin-associated domain/translation elongation factor EF-Ts, N-terminal | Ubiquitin-associated/translation elongation factor EF1B, N-terminal, eukaryote | Zinc finger, C2H2 | Zinc finger, C2H2-like
9.33807	10.0721	AT1G05430	4	134	GTAG	GTAG		unknown protein
5.04659	18.135	AT1G05570	42	556	GTAG	GTAG	callose synthase 1	callose synthase 1 (CALS1); CONTAINS InterPro DOMAIN/s: Glycosyl transferase, family 48 (InterPro:IPR003440), Protein of unknown function DUF605 (InterPro:IPR006745); FUNCTIONS IN: transferase activity, transferring glycosyl groups, 1,3-beta-glucan synthase activity; BEST Arabidopsis thaliana protein match is: glucan synthase-like 3 (TAIR:AT2G31960.2); INVOLVED IN: 1,3-beta-glucan biosynthetic pr…	1,3-beta-glucan synthase subunit FKS1-like, domain-1 | Callose synthase | Glycosyl transferase, family 48 | Vacuolar protein sorting-associate protein Vta1/Callose synthase, N-terminal domain
172.704	22.7044	AT1G05790	12	103	GTAG	GTAG	lipase class 3 family protein	lipase class 3 family protein; FUNCTIONS IN: triglyceride lipase activity; INVOLVED IN: lipid metabolic process; EXPRESSED IN: 24 plant structures; LOCATED IN: endomembrane system; EXPRESSED DURING: 15 growth stages; CONTAINS InterPro DOMAIN/s: Lipase, class 3 (InterPro:IPR002921); BEST Arabidopsis thaliana protein match is: alpha/beta-Hydrolases superfamily protein (TAIR:AT2G42450.1)	Alpha/Beta hydrolase fold | Fungal lipase-like domain
5.05974	3.75832	AT1G05840	9	157	GTAG	GTAG	Eukaryotic aspartyl protease family protein	Eukaryotic aspartyl protease family protein; FUNCTIONS IN: aspartic-type endopeptidase activity; INVOLVED IN: proteolysis; LOCATED IN: anchored to membrane; EXPRESSED IN: 23 plant structures; EXPRESSED DURING: 15 growth stages; CONTAINS InterPro DOMAIN/s: Peptidase aspartic, catalytic (InterPro:IPR009007), Peptidase aspartic (InterPro:IPR021109), Peptidase A1 (InterPro:IPR001461); BEST Arabidopsi…	Aspartic peptidase | Aspartic peptidase domain
12.9173	15.0842	AT1G05850	1	101	GTAG	GTAG	Chitinase family protein	POM-POM1 (POM1); FUNCTIONS IN: chitinase activity; INVOLVED IN: in 9 processes; LOCATED IN: endomembrane system; EXPRESSED IN: 25 plant structures; EXPRESSED DURING: 13 growth stages; CONTAINS InterPro DOMAIN/s: Glycoside hydrolase, family 19 (InterPro:IPR016283), Glycoside hydrolase, family 19, catalytic (InterPro:IPR000726); BEST Arabidopsis thaliana protein match is: chitinase-like protein 2 (…	Glycoside hydrolase, family 19 | Glycoside hydrolase, family 19, catalytic | Lysozyme-like domain
3.73399	3.33195	AT1G05890	12	293	GTAG	GTAG	RING/U-box superfamily protein	ARIADNE 5 (ARI5); FUNCTIONS IN: zinc ion binding; FUNCTIONS IN: zinc ion binding, nucleic acid binding; EXPRESSED IN: 23 plant structures; EXPRESSED IN: 24 plant structures; EXPRESSED DURING: 15 growth stages; CONTAINS InterPro DOMAIN/s: Zinc finger, C6HC-type (InterPro:IPR002867), Zinc finger, RING-type (InterPro:IPR001841); CONTAINS InterPro DOMAIN/s: Zinc finger, C6HC-type (InterPro:IPR002867)…	Zinc finger, C6HC-type | Zinc finger, CCHC-type | Zinc finger, RING-type | Zinc finger, RING/FYVE/PHD-type
6.77914	7.32427	AT1G06110	2	103	GTAG	GTAG	SKP1/ASK-interacting protein 16	SKP1/ASK-interacting protein 16 (SKIP16); CONTAINS InterPro DOMAIN/s: ApaG (InterPro:IPR007474)	ApaG domain | F-box domain
34.0916	13.4928	AT1G06390	10	127	GTAG	GTAG	GSK3/SHAGGY-like protein kinase 1	GSK3/SHAGGY-like protein kinase 1 (GSK1); FUNCTIONS IN: kinase activity, glycogen synthase kinase 3 activity; INVOLVED IN: brassinosteroid mediated signaling pathway, protein amino acid phosphorylation, hyperosmotic salinity response, regulation of protein localization; LOCATED IN: cytosol, plasma membrane; EXPRESSED IN: 24 plant structures; EXPRESSED DURING: 13 growth stages; CONTAINS InterPro D…	Protein kinase domain | Protein kinase, ATP binding site | Protein kinase-like domain | Serine/threonine-protein kinase, active site | Serine/threonine/dual specificity protein kinase, catalytic domain
2.78397	2.64012	AT1G06650	2	90	GCAG	GCAG	2-oxoglutarate (2OG) and Fe(II)-dependent oxygenase superfamily protein	2-oxoglutarate (2OG) and Fe(II)-dependent oxygenase superfamily protein; CONTAINS InterPro DOMAIN/s: Oxoglutarate/iron-dependent oxygenase (InterPro:IPR005123); BEST Arabidopsis thaliana protein match is: 2-oxoglutarate (2OG) and Fe(II)-dependent oxygenase superfamily protein (TAIR:AT1G06640.1)	Isopenicillin N synthase-like | Non-haem dioxygenase N-terminal domain | Oxoglutarate/iron-dependent dioxygenase
4.96191	3.52193	AT1G06700	5	82	GTAG	GTAG	Protein kinase superfamily protein	Protein kinase superfamily protein; FUNCTIONS IN: protein tyrosine kinase activity, protein kinase activity, kinase activity, ATP binding; INVOLVED IN: protein amino acid phosphorylation; LOCATED IN: plasma membrane; EXPRESSED IN: 25 plant structures; EXPRESSED DURING: 15 growth stages; CONTAINS InterPro DOMAIN/s: Protein kinase, ATP binding site (InterPro:IPR017441), Protein kinase, catalytic do…	Protein kinase domain | Protein kinase, ATP binding site | Protein kinase-like domain | Serine-threonine/tyrosine-protein kinase catalytic domain | Tyrosine-protein kinase, active site
19.986	12.4203	AT1G06890	7	84	GTAG	GTAG	nodulin MtN21 /EamA-like transporter family protein	nodulin MtN21 /EamA-like transporter family protein; CONTAINS InterPro DOMAIN/s: Protein of unknown function DUF250 (InterPro:IPR004853); BEST Arabidopsis thaliana protein match is: Nucleotide/sugar transporter family protein (TAIR:AT2G30460.2)	Triose-phosphate transporter domain
66.738	36.0891	AT1G07010	7	97	GCAG	GCAG	Calcineurin-like metallo-phosphoesterase superfamily protein	Calcineurin-like metallo-phosphoesterase superfamily protein; BEST Arabidopsis thaliana protein match is: Calcineurin-like metallo-phosphoesterase superfamily protein (TAIR:AT1G18480.1); FUNCTIONS IN: hydrolase activity, protein serine/threonine phosphatase activity; INVOLVED IN: biological_process unknown; EXPRESSED IN: 21 plant structures; LOCATED IN: peroxisome; EXPRESSED DURING: 13 growth sta…	Calcineurin-like phosphoesterase domain, apaH type | Metallo-dependent phosphatase-like
4.9863	3.45814	AT1G07220	2	85	GTAG	GTAG	Arabidopsis thaliana protein of unknown function (DUF821)	FUNCTIONS IN: molecular_function unknown; INVOLVED IN: biological_process unknown; LOCATED IN: mitochondrion; EXPRESSED IN: 22 plant structures; EXPRESSED DURING: 13 growth stages; CONTAINS InterPro DOMAIN/s: Lipopolysaccharide-modifying protein (InterPro:IPR006598), Protein of unknown function DUF821, CAP10-like (InterPro:IPR008539); BEST Arabidopsis thaliana protein match is: Arabidopsis thalia…	Lipopolysaccharide-modifying protein
3.84783	3.33749	AT1G07320	1	8	TTAG	TTAG	ribosomal protein L4	ribosomal protein L4 (RPL4); FUNCTIONS IN: structural constituent of ribosome, poly(U) RNA binding; INVOLVED IN: translation; LOCATED IN: in 10 components; LOCATED IN: in 7 components; LOCATED IN: in 9 components; EXPRESSED IN: 23 plant structures; EXPRESSED DURING: 14 growth stages; CONTAINS InterPro DOMAIN/s: Ribosomal protein L4 (InterPro:IPR015498), Ribosomal protein L4/L1e, bacterial-type (I…	Ribosomal protein L4 domain | Ribosomal protein L4/L1e | Ribosomal protein L4/L1e, bacterial-type
4.3283	6.85311	AT1G07410	2	240	GTAG	GTAG	RAB GTPase homolog A2B	RAB GTPase homolog A2B (RABA2b); FUNCTIONS IN: GTP binding, GTPase activity; INVOLVED IN: intracellular protein transport, signal transduction, nucleocytoplasmic transport, protein transport, small GTPase mediated signal transduction; LOCATED IN: endosome, plasma membrane, cell plate; EXPRESSED IN: 21 plant structures; EXPRESSED DURING: 7 growth stages; CONTAINS InterPro DOMAIN/s: Ran GTPase (Int…	P-loop containing nucleoside triphosphate hydrolase | Small GTP-binding protein domain | Small GTPase superfamily | Small GTPase superfamily, Rab type
3.61279	3.50102	AT1G07440	1	192	GTAG	GTAG	NAD(P)-binding Rossmann-fold superfamily protein	NAD(P)-binding Rossmann-fold superfamily protein; FUNCTIONS IN: oxidoreductase activity, binding, catalytic activity; INVOLVED IN: response to cadmium ion, response to karrikin; LOCATED IN: cellular_component unknown; EXPRESSED IN: 22 plant structures; EXPRESSED DURING: 13 growth stages; CONTAINS InterPro DOMAIN/s: Short-chain dehydrogenase/reductase, conserved site (InterPro:IPR020904), NAD(P)-b…	Glucose/ribitol dehydrogenase | NAD(P)-binding domain | Short-chain dehydrogenase/reductase SDR | Short-chain dehydrogenase/reductase, conserved site
4.62529	4.86129	AT1G07610	1	125	GTAG	GTAG	metallothionein 1C	metallothionein 1C (MT1C); FUNCTIONS IN: copper ion binding; INVOLVED IN: response to copper ion; LOCATED IN: cytosolic ribosome; EXPRESSED IN: 22 plant structures; EXPRESSED DURING: 14 growth stages; BEST Arabidopsis thaliana protein match is: metallothionein 1A (TAIR:AT1G07600.1)
8.70232	14.5185	AT1G07670	4	87	GTAG	GTAG	endomembrane-type CA-ATPase 4	endomembrane-type CA-ATPase 4 (ECA4); FUNCTIONS IN: calcium-transporting ATPase activity; INVOLVED IN: cation transport, calcium ion transport, metabolic process, ATP biosynthetic process; LOCATED IN: endoplasmic reticulum, plasma membrane; EXPRESSED IN: guard cell, callus, cultured cell; CONTAINS InterPro DOMAIN/s: ATPase, P-type, ATPase-associated domain (InterPro:IPR008250), ATPase, P-type, ca…	Cation-transporting P-type ATPase | Cation-transporting P-type ATPase, C-terminal | Cation-transporting P-type ATPase, N-terminal | HAD-like domain | P-type ATPase, transmembrane domain | P-type ATPase, A domain | P-type ATPase, cytoplasmic domain N | P-type ATPase, phosphorylation site
15.2073	5.89494	AT1G07670	6	91	GTAG	GTAG	endomembrane-type CA-ATPase 4	endomembrane-type CA-ATPase 4 (ECA4); FUNCTIONS IN: calcium-transporting ATPase activity; INVOLVED IN: cation transport, calcium ion transport, metabolic process, ATP biosynthetic process; LOCATED IN: endoplasmic reticulum, plasma membrane; EXPRESSED IN: guard cell, callus, cultured cell; CONTAINS InterPro DOMAIN/s: ATPase, P-type, ATPase-associated domain (InterPro:IPR008250), ATPase, P-type, ca…	Cation-transporting P-type ATPase | Cation-transporting P-type ATPase, C-terminal | Cation-transporting P-type ATPase, N-terminal | HAD-like domain | P-type ATPase, transmembrane domain | P-type ATPase, A domain | P-type ATPase, cytoplasmic domain N | P-type ATPase, phosphorylation site
3.9581	3.64856	AT1G08230	5	93	GTAG	GTAG	Transmembrane amino acid transporter family protein	Transmembrane amino acid transporter family protein; EXPRESSED IN: 22 plant structures; EXPRESSED DURING: 10 growth stages; CONTAINS InterPro DOMAIN/s: Amino acid transporter, transmembrane (InterPro:IPR013057); BEST Arabidopsis thaliana protein match is: Transmembrane amino acid transporter family protein (TAIR:AT5G41800.1)	Amino acid transporter, transmembrane
3.98062	4.3613	AT1G08420	16	68	GTAG	GTAG	BRI1 suppressor 1 (BSU1)-like 2	BRI1 suppressor 1 (BSU1)-like 2 (BSL2); FUNCTIONS IN: hydrolase activity, manganese ion binding, protein serine/threonine phosphatase activity, iron ion binding, phosphoprotein phosphatase activity; FUNCTIONS IN: hydrolase activity, manganese ion binding, protein serine/threonine phosphatase activity, phosphoprotein phosphatase activity, iron ion binding; INVOLVED IN: biological_process unknown; …	Calcineurin-like phosphoesterase domain, apaH type | Kelch repeat type 2 | Kelch-type beta propeller | Metallo-dependent phosphatase-like | Serine/threonine protein phosphatase, BSU1 | Serine/threonine-specific protein phosphatase/bis(5-nucleosyl)-tetraphosphatase
2.25	4.57241	AT1G08465	1	2001	GTAG	GTAG	Plant-specific transcription factor YABBY family protein	YABBY2 (YAB2); CONTAINS InterPro DOMAIN/s: High mobility group, superfamily (InterPro:IPR009071), YABBY protein (InterPro:IPR006780); BEST Arabidopsis thaliana protein match is: plant-specific transcription factor YABBY family protein (TAIR:AT2G26580.2)	High mobility group box domain | YABBY protein
5.78906	11.8238	AT1G08520	1	204	GTAG	GTAG	ALBINA 1	ALBINA 1 (ALB1); FUNCTIONS IN: magnesium chelatase activity, nucleoside-triphosphatase activity, nucleotide binding, ATP binding; INVOLVED IN: chlorophyll biosynthetic process; LOCATED IN: magnesium chelatase complex, chloroplast; EXPRESSED IN: 24 plant structures; EXPRESSED DURING: 13 growth stages; CONTAINS InterPro DOMAIN/s: ATPase, AAA+ type, core (InterPro:IPR003593), Magnesium chelatase, Ch…	AAA+ ATPase domain | Magnesium chelatase, ATPase subunit D | Magnesium chelatase, ChlI subunit | P-loop containing nucleoside triphosphate hydrolase | von Willebrand factor, type A
19.79	9.78437	AT1G08660	1	121	GCAG	GCAG	MALE GAMETOPHYTE DEFECTIVE 2	MALE GAMETOPHYTE DEFECTIVE 2 (MGP2); FUNCTIONS IN: transferase activity, transferring glycosyl groups, sialyltransferase activity; INVOLVED IN: protein amino acid glycosylation; LOCATED IN: Golgi apparatus, membrane; EXPRESSED IN: 22 plant structures; EXPRESSED DURING: 13 growth stages; CONTAINS InterPro DOMAIN/s: Glycosyl transferase, family 29 (InterPro:IPR001675); BEST Arabidopsis thaliana pro…	Glycosyl transferase, family 29
4.81226	12.7577	AT1G08750	5	135	GTAG	GTAG	Peptidase C13 family	Peptidase C13 family; FUNCTIONS IN: GPI-anchor transamidase activity, cysteine-type endopeptidase activity; INVOLVED IN: proteolysis; LOCATED IN: endomembrane system; EXPRESSED IN: 23 plant structures; EXPRESSED DURING: 13 growth stages; CONTAINS InterPro DOMAIN/s: Peptidase C13, legumain (InterPro:IPR001096); BEST Arabidopsis thaliana protein match is: alpha-vacuolar processing enzyme (TAIR:AT2G…	GPI-anchor transamidase | Peptidase C13, legumain
3.82894	6.8267	AT1G08760	1	293	GTAG	GTAG	Plant protein of unknown function (DUF936)	Plant protein of unknown function (DUF936); FUNCTIONS IN: molecular_function unknown; INVOLVED IN: biological_process unknown; LOCATED IN: cellular_component unknown; EXPRESSED IN: cultured cell; CONTAINS InterPro DOMAIN/s: Protein of unknown function DUF936, plant (InterPro:IPR010341); BEST Arabidopsis thaliana protein match is: Plant protein of unknown function (DUF936) (TAIR:AT3G14170.1)	Protein of unknown function DUF936, plant
153.492	7.61973	AT1G08820	4	92	GTAG	GTAG	vamp/synaptobrevin-associated protein 27-2	vamp/synaptobrevin-associated protein 27-2 (VAP27-2); FUNCTIONS IN: structural molecule activity; INVOLVED IN: intracellular transport; LOCATED IN: plasma membrane, endoplasmic reticulum membrane; EXPRESSED IN: cultured cell; CONTAINS InterPro DOMAIN/s: PapD-like (InterPro:IPR008962), Major sperm protein (InterPro:IPR000535); BEST Arabidopsis thaliana protein match is: vesicle associated protein …	MSP domain | PapD-like
4.29101	4.09161	AT1G08900	1	112	GTAG	GTAG	Major facilitator superfamily protein	Major facilitator superfamily protein; FUNCTIONS IN: carbohydrate transmembrane transporter activity; INVOLVED IN: transport, transmembrane transport; LOCATED IN: integral to membrane, membrane; CONTAINS InterPro DOMAIN/s: Sugar transporter, conserved site (InterPro:IPR005829), Major facilitator superfamily (InterPro:IPR020846), General substrate transporter (InterPro:IPR005828), Sugar/inositol t…	General substrate transporter | Major facilitator superfamily domain | Major facilitator superfamily domain, general substrate transporter | Sugar transporter, conserved site | Sugar/inositol transporter
7.42525	4.8177	AT1G08930	4	121	GTAG	GTAG	Major facilitator superfamily protein	EARLY RESPONSE TO DEHYDRATION 6 (ERD6); FUNCTIONS IN: carbohydrate transmembrane transporter activity, sugar:hydrogen symporter activity, sugar transmembrane transporter activity; INVOLVED IN: response to water deprivation, response to salt stress, response to cold, response to chitin, response to abscisic acid stimulus; LOCATED IN: integral to membrane, membrane; EXPRESSED IN: 30 plant structure…	General substrate transporter | Major facilitator superfamily domain | Major facilitator superfamily domain, general substrate transporter | Sugar transporter, conserved site | Sugar/inositol transporter
4.97045	7.39553	AT1G08980	5	80	GTAG	GTAG	amidase 1	amidase 1 (AMI1); FUNCTIONS IN: amidase activity, hydrolase activity, acting on carbon-nitrogen (but not peptide) bonds, indoleacetamide hydrolase activity; INVOLVED IN: indoleacetic acid biosynthetic process; LOCATED IN: cytoplasm; EXPRESSED IN: 25 plant structures; EXPRESSED DURING: 13 growth stages; CONTAINS InterPro DOMAIN/s: Amidase, conserved site (InterPro:IPR020556), Amidase (InterPro:IPR…	Amidase | Amidase signature domain | Amidase, conserved site
6.0668	6.6285	AT1G09100	2	180	GTAG	GTAG	26S proteasome AAA-ATPase subunit RPT5B	26S proteasome AAA-ATPase subunit RPT5B (RPT5B); FUNCTIONS IN: ATPase activity, calmodulin binding; INVOLVED IN: glucose mediated signaling pathway, proteasomal protein catabolic process, embryo sac development, pollen development; LOCATED IN: proteasome complex, plasma membrane, membrane; EXPRESSED IN: 26 plant structures; EXPRESSED DURING: 15 growth stages; CONTAINS InterPro DOMAIN/s: ATPase, A…	26S proteasome subunit P45 | AAA+ ATPase domain | ATPase, AAA-type, conserved site | ATPase, AAA-type, core | P-loop containing nucleoside triphosphate hydrolase
32.193	29.1804	AT1G09210	7	82	GTAG	GTAG	calreticulin 1b	calreticulin 1b (CRT1b); FUNCTIONS IN: unfolded protein binding, calcium ion binding; INVOLVED IN: response to oxidative stress, response to salt stress; LOCATED IN: mitochondrion, endoplasmic reticulum, vacuole; EXPRESSED IN: 26 plant structures; EXPRESSED DURING: 14 growth stages; CONTAINS InterPro DOMAIN/s: Calreticulin/calnexin, P (InterPro:IPR009033), Calreticulin/calnexin (InterPro:IPR00158…	Calreticulin | Calreticulin/calnexin | Calreticulin/calnexin, P domain | Calreticulin/calnexin, conserved site | Concanavalin A-like lectin/glucanase, subgroup | Concanavalin A-like lectin/glucanases superfamily
3.98385	10.2919	AT1G09430	5	97	GTAG	GTAG	ATP-citrate lyase A-3	ATP-citrate lyase A-3 (ACLA-3); CONTAINS InterPro DOMAIN/s: ATP-grasp fold, subdomain 2 (InterPro:IPR013816), ATP-grasp fold, succinyl-CoA synthetase-type (InterPro:IPR013650), Succinyl-CoA synthetase-like (InterPro:IPR016102); BEST Arabidopsis thaliana protein match is: ATP-citrate lyase A-1 (TAIR:AT1G10670.4)	ATP-grasp fold, subdomain 2 | ATP-grasp fold, succinyl-CoA synthetase-type | Succinyl-CoA synthetase-like
6.4055	7.32592	AT1G09795	1	569	GTAG	GTAG	ATP phosphoribosyl transferase 2	ATP phosphoribosyl transferase 2 (ATP-PRT2); FUNCTIONS IN: ATP phosphoribosyltransferase activity; INVOLVED IN: histidine biosynthetic process; LOCATED IN: chloroplast; EXPRESSED IN: 24 plant structures; EXPRESSED DURING: 14 growth stages; CONTAINS InterPro DOMAIN/s: Histidine biosynthesis HisG: ATP phosphoribosyltransferase (InterPro:IPR001348), ATP phosphoribosyltransferase, conserved site (Int…	ATP phosphoribosyltransferase HisG | ATP phosphoribosyltransferase HisG, long form | ATP phosphoribosyltransferase, catalytic domain | ATP phosphoribosyltransferase, conserved site | Histidine biosynthesis HisG, C-terminal | Nitrogen regulatory PII-like, alpha/beta | Nitrogen regulatory protein PII/ATP phosphoribosyltransferase, C-terminal
3.36123	6.6719	AT1G10060	1	35	GCTC	GCTC	branched-chain amino acid transaminase 1	branched-chain amino acid transaminase 1 (BCAT-1); FUNCTIONS IN: branched-chain-amino-acid transaminase activity, protein binding, catalytic activity; INVOLVED IN: branched chain family amino acid metabolic process, metabolic process; LOCATED IN: mitochondrion; EXPRESSED IN: 15 plant structures; EXPRESSED DURING: 8 growth stages; CONTAINS InterPro DOMAIN/s: Aminotransferase, class IV (InterPro:IP…	Aminotransferase, class IV | Aminotransferase, class IV, conserved site | Branched-chain amino acid aminotransferase II
5.91912	3.80365	AT1G10060	5	96	GTAG	GTAG	branched-chain amino acid transaminase 1	branched-chain amino acid transaminase 1 (BCAT-1); FUNCTIONS IN: branched-chain-amino-acid transaminase activity, protein binding, catalytic activity; INVOLVED IN: branched chain family amino acid metabolic process, metabolic process; LOCATED IN: mitochondrion; EXPRESSED IN: 15 plant structures; EXPRESSED DURING: 8 growth stages; CONTAINS InterPro DOMAIN/s: Aminotransferase, class IV (InterPro:IP…	Aminotransferase, class IV | Aminotransferase, class IV, conserved site | Branched-chain amino acid aminotransferase II
2.95881	4.28629	AT1G10200	4	191	GTAG	GTAG	GATA type zinc finger transcription factor family protein	WLIM1; FUNCTIONS IN: sequence-specific DNA binding transcription factor activity, zinc ion binding; INVOLVED IN: biological_process unknown; LOCATED IN: plasma membrane; EXPRESSED IN: 23 plant structures; EXPRESSED DURING: 13 growth stages; CONTAINS InterPro DOMAIN/s: Zinc finger, LIM-type (InterPro:IPR001781); BEST Arabidopsis thaliana protein match is: GATA type zinc finger transcription factor…	Zinc finger, LIM-type
11.5618	9.08194	AT1G10390	3	107	GCAG	GCAG	Nucleoporin autopeptidase	Nucleoporin autopeptidase; FUNCTIONS IN: transporter activity; INVOLVED IN: transport; LOCATED IN: chloroplast, nuclear pore; EXPRESSED IN: 24 plant structures; EXPRESSED DURING: 14 growth stages; CONTAINS InterPro DOMAIN/s: Peptidase S59, nucleoporin (InterPro:IPR007230); BEST Arabidopsis thaliana protein match is: Nucleoporin autopeptidase (TAIR:AT1G59660.1)	Peptidase S59, nucleoporin
32.5114	18.3592	AT1G10390	6	76	GTAG	GTAG	Nucleoporin autopeptidase	Nucleoporin autopeptidase; FUNCTIONS IN: transporter activity; INVOLVED IN: transport; LOCATED IN: chloroplast, nuclear pore; EXPRESSED IN: 24 plant structures; EXPRESSED DURING: 14 growth stages; CONTAINS InterPro DOMAIN/s: Peptidase S59, nucleoporin (InterPro:IPR007230); BEST Arabidopsis thaliana protein match is: Nucleoporin autopeptidase (TAIR:AT1G59660.1)	Peptidase S59, nucleoporin
18.746	50.7458	AT1G10470	4	88	GTAG	GTAG	response regulator 4	response regulator 4 (ARR4); CONTAINS InterPro DOMAIN/s: CheY-like (InterPro:IPR011006), Signal transduction response regulator, receiver domain (InterPro:IPR001789); BEST Arabidopsis thaliana protein match is: response regulator 3 (TAIR:AT1G59940.1)	CheY-like superfamily | Signal transduction response regulator, receiver domain
3.95442	3.49345	AT1G10820	4	103	GTAG	GTAG	Protein of unknown function (DUF3755)	Protein of unknown function (DUF3755); CONTAINS InterPro DOMAIN/s: Protein of unknown function DUF3755 (InterPro:IPR022228); BEST Arabidopsis thaliana protein match is: Protein of unknown function (DUF3755) (TAIR:AT1G60670.2)	Homeodomain-like | Protein of unknown function DUF3755
27.9647	7.76211	AT1G11060	9	180	GTAG	GTAG	WAPL (Wings apart-like protein regulation of heterochromatin) protein	WAPL (Wings apart-like protein regulation of heterochromatin) protein; BEST Arabidopsis thaliana protein match is: WAPL (Wings apart-like protein regulation of heterochromatin) protein (TAIR:AT1G61030.1)	Armadillo-type fold | Wings apart-like protein
5.19214	4.45374	AT1G11120	2	570	GTAG	GTAG		unknown protein; BEST Arabidopsis thaliana protein match is: unknown protein (TAIR:AT1G09812.1); FUNCTIONS IN: molecular_function unknown; INVOLVED IN: biological_process unknown; LOCATED IN: cellular_component unknown; EXPRESSED IN: 10 plant structures; EXPRESSED DURING: 4 anthesis, F mature embryo stage, petal differentiation and expansion stage, E expanded cotyledon stage, D bilateral stage; B…
22.608	10.555	AT1G11780	2	84	GTAG	GTAG	oxidoreductase, 2OG-Fe(II) oxygenase family protein	oxidoreductase, 2OG-Fe(II) oxygenase family protein; BEST Arabidopsis thaliana protein match is: 2-oxoglutarate-dependent dioxygenase family protein (TAIR:AT5G01780.2)	Alpha-ketoglutarate-dependent dioxygenase AlkB-like | Oxoglutarate/iron-dependent dioxygenase
11.6902	7.92788	AT1G11840	6	96	GTAG	GTAG	glyoxalase I homolog	glyoxalase I homolog (GLX1); FUNCTIONS IN: lactoylglutathione lyase activity, metal ion binding; INVOLVED IN: carbohydrate metabolic process; INVOLVED IN: response to cadmium ion, carbohydrate metabolic process; LOCATED IN: peroxisome; LOCATED IN: peroxisome, plasma membrane, vacuole; LOCATED IN: peroxisome, plasma membrane, vacuole, chloroplast envelope; EXPRESSED IN: 25 plant structures; EXPRES…	Glyoxalase I | Glyoxalase I, conserved site | Glyoxalase/Bleomycin resistance protein/Dihydroxybiphenyl dioxygenase | Glyoxalase/fosfomycin resistance/dioxygenase domain
5.92589	8.01311	AT1G11880	2	74	GTAG	GTAG	transferases, transferring hexosyl groups	transferases, transferring hexosyl groups; FUNCTIONS IN: transferase activity, transferring hexosyl groups; INVOLVED IN: GPI anchor biosynthetic process; LOCATED IN: integral to membrane, endoplasmic reticulum membrane; EXPRESSED IN: 10 plant structures; EXPRESSED DURING: F mature embryo stage, petal differentiation and expansion stage, E expanded cotyledon stage, D bilateral stage; CONTAINS Inte…	GPI mannosyltransferase 2
11.173	15.3391	AT1G11960	9	78	GTAG	GTAG	ERD (early-responsive to dehydration stress) family protein	ERD (early-responsive to dehydration stress) family protein; FUNCTIONS IN: molecular_function unknown; INVOLVED IN: biological_process unknown; LOCATED IN: plasma membrane; EXPRESSED IN: 22 plant structures; EXPRESSED DURING: 13 growth stages; CONTAINS InterPro DOMAIN/s: Protein of unknown function DUF221 (InterPro:IPR003864); BEST Arabidopsis thaliana protein match is: ERD (early-responsive to d…	Domain of unknown function DUF221 | Domain of unknown function DUF4463
3.00227	2.08738	AT1G12200	5	144	GTAG	GTAG	Flavin-binding monooxygenase family protein	Flavin-binding monooxygenase family protein; FUNCTIONS IN: NADP or NADPH binding, monooxygenase activity, FAD binding, flavin-containing monooxygenase activity; INVOLVED IN: oxidation reduction; LOCATED IN: cellular_component unknown; EXPRESSED IN: 22 plant structures; EXPRESSED DURING: 13 growth stages; CONTAINS InterPro DOMAIN/s: Flavin-containing monooxygenase FMO (InterPro:IPR000960), Flavin-…	Flavin monooxygenase FMO | Flavin monooxygenase-like
13.7793	7.65739	AT1G12640	6	119	GTAG	GTAG	MBOAT (membrane bound O-acyl transferase) family protein	MBOAT (membrane bound O-acyl transferase) family protein; FUNCTIONS IN: acyltransferase activity; INVOLVED IN: biological_process unknown; LOCATED IN: plasma membrane, membrane; EXPRESSED IN: 25 plant structures; EXPRESSED DURING: 15 growth stages; CONTAINS InterPro DOMAIN/s: Membrane bound O-acyl transferase, MBOAT (InterPro:IPR004299); BEST Arabidopsis thaliana protein match is: MBOAT (membrane…	Membrane bound O-acyl transferase, MBOAT
14.8243	7.56697	AT1G12750	4	116	GTAG	GTAG	RHOMBOID-like protein 6	RHOMBOID-like protein 6 (RBL6); FUNCTIONS IN: serine-type endopeptidase activity; INVOLVED IN: biological_process unknown; LOCATED IN: integral to membrane; EXPRESSED IN: 23 plant structures; EXPRESSED DURING: 15 growth stages; CONTAINS InterPro DOMAIN/s: Peptidase S54, rhomboid (InterPro:IPR002610); BEST Arabidopsis thaliana protein match is: RHOMBOID-like 2 (TAIR:AT1G63120.1)	Peptidase S54, rhomboid | Peptidase S54, rhomboid domain
4.81091	8.25776	AT1G13120	8	121	GTAG	GTAG	embryo defective 1745	embryo defective 1745 (emb1745); FUNCTIONS IN: molecular_function unknown; INVOLVED IN: embryo development ending in seed dormancy; LOCATED IN: nuclear pore; EXPRESSED IN: 24 plant structures; EXPRESSED DURING: 14 growth stages; CONTAINS InterPro DOMAIN/s: GLE1-like (InterPro:IPR012476); BEST Arabidopsis thaliana protein match is: unknown protein (TAIR:AT4G05523.1)	GLE1-like
93.3381	27.6984	AT1G13160	4	228	GTAG	GTAG	ARM repeat superfamily protein	ARM repeat superfamily protein; FUNCTIONS IN: binding; INVOLVED IN: biological_process unknown; LOCATED IN: cellular_component unknown; EXPRESSED IN: 20 plant structures; EXPRESSED DURING: 13 growth stages; CONTAINS InterPro DOMAIN/s: Domain of unknown function, nucleolar NUC130/133, N-terminal (InterPro:IPR012977), Armadillo-type fold (InterPro:IPR016024), SDA1 (InterPro:IPR007949); BEST Arabido…	Armadillo-type fold | SDA1 domain | Sda1 | Uncharacterised domain NUC130/133, N-terminal
4.94564	11.455	AT1G13300	1	174	GTAG	GTAG	myb-like transcription factor family protein	HYPERSENSITIVITY TO LOW PI-ELICITED PRIMARY ROOT SHORTENING 1 (HRS1); CONTAINS InterPro DOMAIN/s: Homeodomain-like (InterPro:IPR009057), Myb, DNA-binding (InterPro:IPR014778), HTH transcriptional regulator, Myb-type, DNA-binding (InterPro:IPR017930), Myb-like DNA-binding domain, SHAQKYF class (InterPro:IPR006447), Homeodomain-related (InterPro:IPR012287); BEST Arabidopsis thaliana protein match i…	Homeodomain-like | Myb domain | Myb domain, plants | SANT/Myb domain
7.82011	4.53935	AT1G14360	1	97	GTAG	GTAG	UDP-galactose transporter 3	UDP-galactose transporter 3 (UTR3); FUNCTIONS IN: pyrimidine nucleotide sugar transmembrane transporter activity; INVOLVED IN: transmembrane transport; LOCATED IN: endomembrane system; EXPRESSED IN: 24 plant structures; EXPRESSED DURING: 15 growth stages; CONTAINS InterPro DOMAIN/s: UAA transporter (InterPro:IPR013657); BEST Arabidopsis thaliana protein match is: UDP-galactose transporter 1 (TAIR…	UAA transporter
2.36297	2.93328	AT1G14650	3	490	GTAG	GTAG	SWAP (Suppressor-of-White-APricot)/surp domain-containing protein / ubiquitin family protein	SWAP (Suppressor-of-White-APricot)/surp domain-containing protein / ubiquitin family protein; FUNCTIONS IN: RNA binding; INVOLVED IN: RNA processing; EXPRESSED IN: 24 plant structures; EXPRESSED DURING: 14 growth stages; CONTAINS InterPro DOMAIN/s: SWAP/Surp (InterPro:IPR000061), Ubiquitin (InterPro:IPR000626), Pre-mRNA splicing factor PRP21 like protein (InterPro:IPR022030), Ubiquitin supergroup…	Pre-mRNA splicing factor PRP21-like protein | SWAP/Surp | Ubiquitin-like | Ubiquitin-related domain
4.09819	3.53762	AT1G14660	13	79	GTAG	GTAG	Na+/H+ exchanger 8	Na+/H+ exchanger 8 (NHX8); CONTAINS InterPro DOMAIN/s: Cation/H+ exchanger, conserved region (InterPro:IPR018422), Cation/H+ exchanger (InterPro:IPR006153), Na+/H+ exchanger, isoforms 7/8, conserved region (InterPro:IPR018418); BEST Arabidopsis thaliana protein match is: sodium proton exchanger, putative (NHX7) (SOS1) (TAIR:AT2G01980.1)	Cation/H+ exchanger | Cation/H+ exchanger, CPA1 family
3.1012	3.12006	AT1G14710	2	105	GTAG	GTAG	hydroxyproline-rich glycoprotein family protein	hydroxyproline-rich glycoprotein family protein; BEST Arabidopsis thaliana protein match is: oxidoreductase, 2OG-Fe(II) oxygenase family protein (TAIR:AT4G02940.1)	Alpha-ketoglutarate-dependent dioxygenase AlkB-like
6.79087	5.81869	AT1G14810	5	101	GTAG	GTAG	semialdehyde dehydrogenase family protein	semialdehyde dehydrogenase family protein; FUNCTIONS IN: oxidoreductase activity, acting on the aldehyde or oxo group of donors, NAD or NADP as acceptor, aspartate-semialdehyde dehydrogenase activity; INVOLVED IN: cellular amino acid biosynthetic process, oxidation reduction, threonine biosynthetic process, methionine biosynthetic process, cellular amino acid metabolic process; LOCATED IN: mitoch…	Aspartate-semialdehyde dehydrogenase | Aspartate-semialdehyde dehydrogenase, beta-type | NAD(P)-binding domain | Semialdehyde dehydrogenase, NAD-binding | Semialdehyde dehydrogenase, dimerisation domain
52.8879	38.5096	AT1G15240	11	101	GTAG	GTAG	Phox-associated domain;Phox-like;Sorting nexin, C-terminal	Phox-associated domain;Phox-like;Sorting nexin, C-terminal; CONTAINS InterPro DOMAIN/s: PX-associated, sorting nexin 13 (InterPro:IPR013996), Sorting nexin, C-terminal (InterPro:IPR013937), Phox-like (InterPro:IPR001683), Phox-associated domain (InterPro:IPR003114); CONTAINS InterPro DOMAIN/s: Phox-like (InterPro:IPR001683), Phox-associated domain (InterPro:IPR003114); BEST Arabidopsis thaliana p…	Phox homologous domain | Phox-associated domain | Sorting nexin, C-terminal
94.6511	31.7862	AT1G15280	2	352	GTAG	GTAG	CASC3/Barentsz eIF4AIII binding	CASC3/Barentsz eIF4AIII binding; FUNCTIONS IN: molecular_function unknown; INVOLVED IN: biological_process unknown; LOCATED IN: cytosol; EXPRESSED IN: 23 plant structures; EXPRESSED DURING: 13 growth stages; CONTAINS InterPro DOMAIN/s: CASC3/Barentsz eIF4AIII binding (InterPro:IPR018545); BEST Arabidopsis thaliana protein match is: CASC3/Barentsz eIF4AIII binding (TAIR:AT1G80000.2)	Btz domain
6.81449	7.87585	AT1G15740	10	109	GTAG	GTAG	Leucine-rich repeat family protein	Leucine-rich repeat family protein; BEST Arabidopsis thaliana protein match is: Leucine-rich repeat (LRR) family protein (TAIR:AT4G23840.1)
31.853	19.5183	AT1G15750	11	83	GTAG	GTAG	Transducin family protein / WD-40 repeat family protein	TOPLESS (TPL); FUNCTIONS IN: protein binding, transcription repressor activity, protein homodimerization activity; INVOLVED IN: xylem and phloem pattern formation, response to auxin stimulus, primary shoot apical meristem specification, jasmonic acid mediated signaling pathway; LOCATED IN: cytosol, nucleus; EXPRESSED IN: 27 plant structures; EXPRESSED DURING: 15 growth stages; CONTAINS InterPro D…	CTLH, C-terminal LisH motif | LisH dimerisation motif | Topless family | WD40 repeat | WD40 repeat, conserved site | WD40-repeat-containing domain | WD40/YVTN repeat-like-containing domain
5.3148	4.94336	AT1G15810	2	150	GTAG	GTAG	S15/NS1, RNA-binding protein	S15/NS1, RNA-binding protein; FUNCTIONS IN: structural constituent of ribosome; INVOLVED IN: translation; LOCATED IN: small ribosomal subunit, ribosome, intracellular; EXPRESSED IN: 24 plant structures; EXPRESSED DURING: 14 growth stages; CONTAINS InterPro DOMAIN/s: Ribosomal protein S15 (InterPro:IPR000589), Ribosomal protein S15, bacterial-type (InterPro:IPR005290), S15/NS1, RNA-binding (InterP…	Ribosomal protein S15 | Ribosomal protein S15, bacterial-type | S15/NS1, RNA-binding
14.8398	31.8668	AT1G16190	1	273	GTAG	GTAG	Rad23 UV excision repair protein family	RADIATION SENSITIVE23A (RAD23A); FUNCTIONS IN: damaged DNA binding, ubiquitin binding, proteasome binding; INVOLVED IN: proteasomal ubiquitin-dependent protein catabolic process, base-excision repair, nucleotide-excision repair; LOCATED IN: nucleus; EXPRESSED IN: 21 plant structures; EXPRESSED DURING: 13 growth stages; CONTAINS InterPro DOMAIN/s: Heat shock chaperonin-binding (InterPro:IPR006636)…	Heat shock chaperonin-binding | UBA-like | UV excision repair protein Rad23 | Ubiquitin-associated domain/translation elongation factor EF-Ts, N-terminal | Ubiquitin-associated/translation elongation factor EF1B, N-terminal, eukaryote | Ubiquitin-like | Ubiquitin-related domain | XPC-binding domain
5.70141	11.4248	AT1G16270	6	72	GTAG	GTAG	Protein kinase superfamily protein with octicosapeptide/Phox/Bem1p domain	Protein kinase superfamily protein with octicosapeptide/Phox/Bem1p domain; FUNCTIONS IN: protein serine/threonine/tyrosine kinase activity, protein kinase activity; INVOLVED IN: protein amino acid phosphorylation; LOCATED IN: cytosol, nucleus; CONTAINS InterPro DOMAIN/s: Octicosapeptide/Phox/Bem1p (InterPro:IPR000270), Protein kinase, ATP binding site (InterPro:IPR017441), Protein kinase, catalyt…	Phox/Bem1p | Protein kinase domain | Protein kinase, ATP binding site | Protein kinase-like domain | Serine-threonine/tyrosine-protein kinase catalytic domain | Serine/threonine-protein kinase, active site
13.786	7.19709	AT1G16780	1	129	GTAG	GTAG	Inorganic H pyrophosphatase family protein	VHP2;2; FUNCTIONS IN: inorganic diphosphatase activity, hydrogen-translocating pyrophosphatase activity; INVOLVED IN: proton transport; LOCATED IN: Golgi apparatus, vacuole; EXPRESSED IN: 22 plant structures; EXPRESSED DURING: 13 growth stages; CONTAINS InterPro DOMAIN/s: Inorganic H+ pyrophosphatase (InterPro:IPR004131); BEST Arabidopsis thaliana protein match is: vacuolar H+-pyrophosphatase 2 (…
13.4566	12.9184	AT1G16825	2	279	GCAG	GCAG	Reticulon family protein	Reticulon family protein; FUNCTIONS IN: molecular_function unknown; INVOLVED IN: biological_process unknown; LOCATED IN: endoplasmic reticulum; CONTAINS InterPro DOMAIN/s: Reticulon (InterPro:IPR003388); BEST Arabidopsis thaliana protein match is: Reticulon family protein (TAIR:AT1G78895.1)	Reticulon
3.84973	3.46448	AT1G17145	8	259	GTAG	GTAG	RING/U-box superfamily protein	RING/U-box superfamily protein; FUNCTIONS IN: zinc ion binding; INVOLVED IN: biological_process unknown; LOCATED IN: cellular_component unknown; EXPRESSED IN: 24 plant structures; EXPRESSED DURING: 15 growth stages; CONTAINS InterPro DOMAIN/s: Zinc finger, RING-type (InterPro:IPR001841); BEST Arabidopsis thaliana protein match is: RING/U-box superfamily protein (TAIR:AT1G78420.2)	Zinc finger, RING-type | Zinc finger, RING/FYVE/PHD-type
4.50709	6.86797	AT1G17220	11	152	GTAG	GTAG	Translation initiation factor 2, small GTP-binding protein	fu-gaeri1 (FUG1); FUNCTIONS IN: translation initiation factor activity; INVOLVED IN: translational initiation; LOCATED IN: chloroplast, chloroplast envelope; EXPRESSED IN: 23 plant structures; EXPRESSED DURING: 13 growth stages; CONTAINS InterPro DOMAIN/s: Translation initiation factor IF-2, N-terminal (InterPro:IPR006847), Small GTP-binding protein (InterPro:IPR005225), Translation elongation fa…	Elongation factor, GTP-binding domain | P-loop containing nucleoside triphosphate hydrolase | Small GTP-binding protein domain | Translation elongation factor EFTu/EF1A, domain 2 | Translation initiation factor IF- 2 | Translation initiation factor IF- 2, domain 3 | Translation initiation factor IF-2, N-terminal | Translation initiation factor aIF-2, bacterial-like | Translation protein, beta-bar…
44.7304	6.909	AT1G17350	7	180	GTAG	GTAG	NADH:ubiquinone oxidoreductase intermediate-associated protein 30	NADH:ubiquinone oxidoreductase intermediate-associated protein 30; FUNCTIONS IN: molecular_function unknown; INVOLVED IN: biological_process unknown; LOCATED IN: mitochondrion; EXPRESSED IN: 22 plant structures; EXPRESSED DURING: 13 growth stages; CONTAINS InterPro DOMAIN/s: NADH:ubiquinone oxidoreductase intermediate-associated protein 30 (InterPro:IPR013857); BEST Arabidopsis thaliana protein m…	Galactose-binding domain-like | NADH:ubiquinone oxidoreductase intermediate-associated protein 30
6.04367	6.22623	AT1G17410	3	97	GTAG	GTAG	Nucleoside diphosphate kinase family protein	Nucleoside diphosphate kinase family protein; FUNCTIONS IN: nucleoside diphosphate kinase activity, ATP binding; INVOLVED IN: UTP biosynthetic process, GTP biosynthetic process, CTP biosynthetic process; INVOLVED IN: in 6 processes; EXPRESSED IN: 23 plant structures; LOCATED IN: endomembrane system; EXPRESSED DURING: 15 growth stages; CONTAINS InterPro DOMAIN/s: Nucleoside diphosphate kinase, cor…	Nucleoside diphosphate kinase
18.17	13.0215	AT1G17500	3	85	GTAG	GTAG	ATPase E1-E2 type family protein / haloacid dehalogenase-like hydrolase family protein	ATPase E1-E2 type family protein / haloacid dehalogenase-like hydrolase family protein; FUNCTIONS IN: ATPase activity, coupled to transmembrane movement of ions, phosphorylative mechanism; INVOLVED IN: metabolic process, ATP biosynthetic process, phospholipid transport; LOCATED IN: integral to membrane, membrane; EXPRESSED IN: 23 plant structures; EXPRESSED DURING: 13 growth stages; CONTAINS Inte…	Cation-transporting P-type ATPase, subfamily IV | Cation-transporting P-type ATPase | HAD-like domain | P-type ATPase, A domain | P-type ATPase, cytoplasmic domain N | P-type ATPase, phosphorylation site
3.14373	5.04608	AT1G17560	1	105	GTAG	GTAG	Ribosomal protein L14p/L23e family protein	HUELLENLOS (HLL); FUNCTIONS IN: structural constituent of ribosome; INVOLVED IN: translation; LOCATED IN: ribosome, intracellular, large ribosomal subunit; EXPRESSED IN: 20 plant structures; EXPRESSED DURING: 11 growth stages; CONTAINS InterPro DOMAIN/s: Ribosomal protein L14, bacterial-type (InterPro:IPR005745), Ribosomal protein L14b/L23e (InterPro:IPR000218), Ribosomal protein L14 conserved si…	Ribosomal protein L14 conserved site | Ribosomal protein L14 domain | Ribosomal protein L14b/L23e
13.9312	28.6859	AT1G17690	21	164	GTAG	GTAG		FUNCTIONS IN: molecular_function unknown; INVOLVED IN: biological_process unknown; LOCATED IN: nucleus; EXPRESSED IN: 24 plant structures; EXPRESSED DURING: 13 growth stages; CONTAINS InterPro DOMAIN/s: Digestive organ expansion factor, predicted (InterPro:IPR010678)	Digestive organ expansion factor, predicted | P-loop containing nucleoside triphosphate hydrolase
10.2741	8.40803	AT1G17720	3	98	GTAG	GTAG	Protein phosphatase 2A, regulatory subunit PR55	ATB BETA; CONTAINS InterPro DOMAIN/s: WD40 repeat-like-containing domain (InterPro:IPR011046), Protein phosphatase 2A, regulatory subunit PR55 (InterPro:IPR000009), Protein phosphatase 2A, regulatory subunit PR55, conserved site (InterPro:IPR018067), WD40 repeat, conserved site (InterPro:IPR019775), WD40/YVTN repeat-like-containing domain (InterPro:IPR015943), WD40 repeat (InterPro:IPR001680), WD…	Protein phosphatase 2A, regulatory subunit PR55 | Protein phosphatase 2A, regulatory subunit PR55, conserved site | WD40 repeat | WD40 repeat, conserved site | WD40-repeat-containing domain | WD40/YVTN repeat-like-containing domain
4.12231	3.735	AT1G17820	3	145	GCAG	GCAG	Putative integral membrane protein conserved region (DUF2404)	Putative integral membrane protein conserved region (DUF2404); FUNCTIONS IN: phosphoinositide binding; INVOLVED IN: signal transduction; LOCATED IN: endomembrane system; CONTAINS InterPro DOMAIN/s: Protein of unknown function DUF2404, transmembrane (InterPro:IPR019411), Pleckstrin homology (InterPro:IPR001849); BEST Arabidopsis thaliana protein match is: Putative integral membrane protein conserv…	Domain of unknown function DUF2404 | Pleckstrin homology domain
5.8931	6.95022	AT1G17980	2	85	GTAG	GTAG	poly(A) polymerase 1	poly(A) polymerase 1 (PAPS1); CONTAINS InterPro DOMAIN/s: Poly(A) polymerase (InterPro:IPR014492), Poly(A) polymerase, central domain (InterPro:IPR007012), Nucleotidyltransferase, class I, C-terminal-like (InterPro:IPR011068), Nucleotidyl transferase domain (InterPro:IPR002934), Poly(A) polymerase, RNA-binding domain (InterPro:IPR007010); CONTAINS InterPro DOMAIN/s: Poly(A) polymerase (InterPro:I…	Nucleotidyl transferase domain | Nucleotidyltransferase, class I, C-terminal-like | Poly(A) polymerase | Poly(A) polymerase, RNA-binding domain | Poly(A) polymerase, central domain
7.77165	12.5568	AT1G18160	12	84	GTAG	GTAG	Protein kinase superfamily protein	Protein kinase superfamily protein; FUNCTIONS IN: protein serine/threonine/tyrosine kinase activity, kinase activity; INVOLVED IN: protein amino acid phosphorylation; LOCATED IN: plasma membrane; EXPRESSED IN: 22 plant structures; EXPRESSED DURING: 13 growth stages; CONTAINS InterPro DOMAIN/s: Protein kinase, ATP binding site (InterPro:IPR017441), Serine/threonine-protein kinase domain (InterPro:…	Protein kinase domain | Protein kinase, ATP binding site | Protein kinase-like domain | Serine-threonine/tyrosine-protein kinase catalytic domain | Serine/threonine-protein kinase, active site
6.38195	4.65809	AT1G18250	1	79	GTAG	GTAG	Pathogenesis-related thaumatin superfamily protein	ATLP-1; INVOLVED IN: response to other organism; LOCATED IN: endomembrane system; EXPRESSED IN: 19 plant structures; EXPRESSED DURING: 13 growth stages; CONTAINS InterPro DOMAIN/s: Thaumatin, conserved site (InterPro:IPR017949), Thaumatin, pathogenesis-related (InterPro:IPR001938); BEST Arabidopsis thaliana protein match is: Pathogenesis-related thaumatin superfamily protein (TAIR:AT1G73620.1)	Thaumatin | Thaumatin, conserved site
14.8552	22.8918	AT1G18390	4	100	GTAG	GTAG	Protein kinase superfamily protein	Protein kinase superfamily protein; FUNCTIONS IN: protein serine/threonine kinase activity, protein kinase activity, kinase activity, ATP binding; INVOLVED IN: protein amino acid phosphorylation; EXPRESSED IN: 22 plant structures; LOCATED IN: plasma membrane; EXPRESSED DURING: 13 growth stages; CONTAINS InterPro DOMAIN/s: Protein kinase, ATP binding site (InterPro:IPR017441), Protein kinase, cata…	Concanavalin A-like lectin/glucanase, subgroup | Protein kinase domain | Protein kinase, ATP binding site | Protein kinase-like domain | Serine/threonine-protein kinase, active site | Wall-associated receptor kinase galacturonan-binding domain
2.57488	2.79295	AT1G18620	1	341	GTAG	GTAG		unknown protein; FUNCTIONS IN: molecular_function unknown; INVOLVED IN: biological_process unknown; LOCATED IN: cellular_component unknown; EXPRESSED IN: 22 plant structures; EXPRESSED DURING: 13 growth stages; BEST Arabidopsis thaliana protein match is: unknown protein (TAIR:AT1G74160.1)	Domain of unknown function DUF4378
11.8378	8.94945	AT1G18630	1	394	GTAG	GTAG	glycine-rich RNA-binding protein 6	glycine-rich RNA-binding protein 6 (GR-RBP6); FUNCTIONS IN: RNA binding, nucleotide binding, nucleic acid binding; INVOLVED IN: biological_process unknown; LOCATED IN: mitochondrion; EXPRESSED IN: 22 plant structures; EXPRESSED DURING: 13 growth stages; CONTAINS InterPro DOMAIN/s: RNA recognition motif, RNP-1 (InterPro:IPR000504), Nucleotide-binding, alpha-beta plait (InterPro:IPR012677); BEST Ar…	Nucleotide-binding, alpha-beta plait | RNA recognition motif domain
10.8805	14.4954	AT1G18950	4	79	GTAG	GTAG	DDT domain superfamily	DDT domain superfamily; CONTAINS InterPro DOMAIN/s: DDT domain (InterPro:IPR004022); BEST Arabidopsis thaliana protein match is: unknown protein (TAIR:AT5G25580.1)	DDT domain
8.90869	7.17158	AT1G19010	3	174	GTAG	GTAG		unknown protein; BEST Arabidopsis thaliana protein match is: unknown protein (TAIR:AT1G74860.1)
3.50064	3.56106	AT1G19240	1	508	GTAG	GTAG		unknown protein
50.9118	37.3617	AT1G19600	1	156	GTAG	GTAG	pfkB-like carbohydrate kinase family protein	pfkB-like carbohydrate kinase family protein; FUNCTIONS IN: kinase activity; INVOLVED IN: D-ribose catabolic process; LOCATED IN: cellular_component unknown; EXPRESSED IN: 21 plant structures; EXPRESSED DURING: 13 growth stages; CONTAINS InterPro DOMAIN/s: Carbohydrate/purine kinase (InterPro:IPR011611); BEST Arabidopsis thaliana protein match is: pfkB-like carbohydrate kinase family protein (TAI…	Carbohydrate kinase PfkB | Ribokinase-like
17.0059	30.4346	AT1G19660	9	100	GTAG	GTAG	Wound-responsive family protein	Wound-responsive family protein; FUNCTIONS IN: DNA binding, nuclease activity; INVOLVED IN: response to wounding, nucleotide-excision repair; EXPRESSED IN: ovule; CONTAINS InterPro DOMAIN/s: Protein of unknown function DUF151 (InterPro:IPR003729), UvrB/UvrC protein (InterPro:IPR001943); BEST Arabidopsis thaliana protein match is: bifunctional nuclease in basal defense response 1 (TAIR:AT1G75380.3)	Bifunctional nuclease domain | UVR domain
22.262	11.7867	AT1G19880	6	92	GCAG	GCAG	Regulator of chromosome condensation (RCC1) family protein	Regulator of chromosome condensation (RCC1) family protein; CONTAINS InterPro DOMAIN/s: Regulator of chromosome condensation/beta-lactamase-inhibitor protein II (InterPro:IPR009091), Regulator of chromosome condensation, RCC1 (InterPro:IPR000408); BEST Arabidopsis thaliana protein match is: Regulator of chromosome condensation (RCC1) family protein (TAIR:AT5G63860.1)	Protein RCC2 | Regulator of chromosome condensation 1/beta-lactamase-inhibitor protein II | Regulator of chromosome condensation, RCC1
4.62887	3.42326	AT1G20020	4	85	GTAG	GTAG	ferredoxin-NADP(+)-oxidoreductase 2	LEAF FNR 2 (ATLFNR2); ferredoxin-NADP(+)-oxidoreductase 2 (FNR2); FUNCTIONS IN: oxidoreductase activity, poly(U) RNA binding, NADPH dehydrogenase activity; INVOLVED IN: oxidation reduction, defense response to fungus, incompatible interaction, defense response to bacterium; LOCATED IN: thylakoid, chloroplast thylakoid membrane, apoplast, chloroplast stroma, chloroplast; EXPRESSED IN: 22 plant str…	Ferredoxin reductase-type FAD-binding domain | Ferredoxin--NADP reductase | Flavoprotein pyridine nucleotide cytochrome reductase | Oxidoreductase FAD/NAD(P)-binding | Oxidoreductase, FAD-binding domain | Riboflavin synthase-like beta-barrel
20.9241	23.8854	AT1G20220	7	130	GTAG	GTAG	Alba DNA/RNA-binding protein	Alba DNA/RNA-binding protein; FUNCTIONS IN: nucleic acid binding; INVOLVED IN: biological_process unknown; LOCATED IN: plant-type cell wall; EXPRESSED IN: 25 plant structures; EXPRESSED DURING: 15 growth stages; CONTAINS InterPro DOMAIN/s: Alba, DNA/RNA-binding protein (InterPro:IPR002775); BEST Arabidopsis thaliana protein match is: Alba DNA/RNA-binding protein (TAIR:AT1G76010.1)	DNA/RNA-binding protein Alba-like
4.49194	5.417	AT1G20540	2	99	GTAG	GTAG	Transducin/WD40 repeat-like superfamily protein	Transducin/WD40 repeat-like superfamily protein; CONTAINS InterPro DOMAIN/s: WD40 repeat 2 (InterPro:IPR019782), WD40 repeat-like-containing domain (InterPro:IPR011046), WD40-repeat-containing domain (InterPro:IPR017986), WD40/YVTN repeat-like-containing domain (InterPro:IPR015943), WD40 repeat (InterPro:IPR001680), WD40 repeat, subgroup (InterPro:IPR019781); BEST Arabidopsis thaliana protein mat…	WD40 repeat | WD40-repeat-containing domain | WD40/YVTN repeat-like-containing domain
3.66618	4.69137	AT1G20620	2	155	GTAG	GTAG	catalase 3	catalase 3 (CAT3); FUNCTIONS IN: catalase activity, cobalt ion binding; INVOLVED IN: in 7 processes; LOCATED IN: in 11 components; LOCATED IN: in 9 components; EXPRESSED IN: 29 plant structures; EXPRESSED DURING: 17 growth stages; CONTAINS InterPro DOMAIN/s: Catalase (InterPro:IPR002226), Catalase related subgroup (InterPro:IPR018028), Catalase-like domain, haem-dependent (InterPro:IPR020835), Ca…	Catalase core domain | Catalase haem-binding site | Catalase immune-responsive domain | Catalase, mono-functional, haem-containing | Catalase, mono-functional, haem-containing, clades 1 and 3 | Catalase-like domain
3.12804	4.21797	AT1G20950	3	98	GTAG	GTAG	Phosphofructokinase family protein	Phosphofructokinase family protein; FUNCTIONS IN: diphosphate-fructose-6-phosphate 1-phosphotransferase activity; INVOLVED IN: response to fructose stimulus, response to sucrose stimulus, photosynthesis, response to glucose stimulus; LOCATED IN: pyrophosphate-dependent phosphofructokinase complex, alpha-subunit complex; EXPRESSED IN: 23 plant structures; EXPRESSED DURING: 13 growth stages; CONTAI…	Phosphofructokinase domain | Pyrophosphate-dependent phosphofructokinase PfpB | Pyrophosphate-dependent phosphofructokinase, alpha-helical domain
2.26624	2.60774	AT1G21830	1	472	GTAG	GTAG		unknown protein; CONTAINS InterPro DOMAIN/s: Protein of unknown function DUF740 (InterPro:IPR008004); BEST Arabidopsis thaliana protein match is: unknown protein (TAIR:AT1G44608.1)	Uncharacterised protein family UPF0503
3.81135	4.76592	AT1G22440	6	103	GTAG	GTAG	Zinc-binding alcohol dehydrogenase family protein	Zinc-binding alcohol dehydrogenase family protein; FUNCTIONS IN: oxidoreductase activity, zinc ion binding; INVOLVED IN: oxidation reduction; LOCATED IN: cellular_component unknown; EXPRESSED IN: hypocotyl, root; CONTAINS InterPro DOMAIN/s: GroES-like (InterPro:IPR011032), Alcohol dehydrogenase GroES-like (InterPro:IPR013154), Alcohol dehydrogenase, zinc-containing, conserved site (InterPro:IPR00…	Alcohol dehydrogenase GroES-like | Alcohol dehydrogenase superfamily, zinc-type | Alcohol dehydrogenase, C-terminal | Alcohol dehydrogenase, zinc-type, conserved site | GroES (chaperonin 10)-like | NAD(P)-binding domain
4.21679	13.7582	AT1G22800	8	100	GTAG	GTAG	S-adenosyl-L-methionine-dependent methyltransferases superfamily protein	S-adenosyl-L-methionine-dependent methyltransferases superfamily protein; FUNCTIONS IN: methyltransferase activity; INVOLVED IN: metabolic process; LOCATED IN: cellular_component unknown; EXPRESSED IN: 23 plant structures; EXPRESSED DURING: 16 growth stages; CONTAINS InterPro DOMAIN/s: Methyltransferase type 11 (InterPro:IPR013216)	Methyltransferase type 11 | S-adenosyl-L-methionine-dependent methyltransferase-like
4.38102	3.10328	AT1G22800	6	99	GTAG	GTAG	S-adenosyl-L-methionine-dependent methyltransferases superfamily protein	S-adenosyl-L-methionine-dependent methyltransferases superfamily protein; FUNCTIONS IN: methyltransferase activity; INVOLVED IN: metabolic process; LOCATED IN: cellular_component unknown; EXPRESSED IN: 23 plant structures; EXPRESSED DURING: 16 growth stages; CONTAINS InterPro DOMAIN/s: Methyltransferase type 11 (InterPro:IPR013216)	Methyltransferase type 11 | S-adenosyl-L-methionine-dependent methyltransferase-like
10.378	117.432	AT1G22860	8	187	GTAG	GTAG	Vacuolar sorting protein 39	Vacuolar sorting protein 39; FUNCTIONS IN: small GTPase regulator activity; INVOLVED IN: biological_process unknown; LOCATED IN: cellular_component unknown; EXPRESSED IN: 22 plant structures; EXPRESSED DURING: 13 growth stages; CONTAINS InterPro DOMAIN/s: Citron-like (InterPro:IPR001180), Vacuolar sorting protein 39/Transforming growth factor beta receptor-associated domain 1 (InterPro:IPR019452)…	Citron-like | Quinonprotein alcohol dehydrogenase-like superfamily | Vacuolar sorting protein 39/Transforming growth factor beta receptor-associated domain 1 | Vacuolar sorting protein 39/Transforming growth factor beta receptor-associated domain 2
4.10898	4.00676	AT1G22930	1	22	GTTT	GTTT	T-complex protein 11	T-complex protein 11; INVOLVED IN: biological_process unknown; BEST Arabidopsis thaliana protein match is: T-complex protein 11 (TAIR:AT4G09150.1); EXPRESSED IN: 24 plant structures; EXPRESSED DURING: 13 growth stages; CONTAINS InterPro DOMAIN/s: T-complex 11 (InterPro:IPR008862); BEST Arabidopsis thaliana protein match is: T-complex protein 11 (TAIR:AT4G09150.2)	T-complex 11
4.98492	5.25221	AT1G23440	4	73	GTAG	GTAG	Peptidase C15, pyroglutamyl peptidase I-like	Peptidase C15, pyroglutamyl peptidase I-like; CONTAINS InterPro DOMAIN/s: Peptidase C15, pyroglutamyl peptidase I-like (InterPro:IPR016125); FUNCTIONS IN: peptidase activity; BEST Arabidopsis thaliana protein match is: Peptidase C15, pyroglutamyl peptidase I-like (TAIR:AT1G56700.2); INVOLVED IN: proteolysis; LOCATED IN: cellular_component unknown; EXPRESSED IN: 22 plant structures; EXPRESSED DURI…	Peptidase C15, pyroglutamyl peptidase I | Peptidase C15, pyroglutamyl peptidase I-like
2.2206	2.82648	AT1G23950	2	81	GTAG	GTAG	Protein of unknown function (DUF626)	Protein of unknown function (DUF626); FUNCTIONS IN: molecular_function unknown; BEST Arabidopsis thaliana protein match is: Protein of unknown function (DUF626) (TAIR:AT1G23970.1); INVOLVED IN: biological_process unknown; LOCATED IN: cellular_component unknown; EXPRESSED IN: male gametophyte, pollen tube; EXPRESSED DURING: L mature pollen stage, M germinated pollen stage; CONTAINS InterPro DOMAIN…	Protein of unknown function DUF626, Arabidopsis thaliana
31.6037	35.655	AT1G24265	1	132	GTAG	GTAG	Protein of unknown function (DUF1664)	Protein of unknown function (DUF1664); FUNCTIONS IN: molecular_function unknown; INVOLVED IN: biological_process unknown; LOCATED IN: endomembrane system; CONTAINS InterPro DOMAIN/s: Protein of unknown function DUF1664 (InterPro:IPR012458); BEST Arabidopsis thaliana protein match is: Protein of unknown function (DUF1664) (TAIR:AT1G24267.1)	Protein of unknown function DUF1664
43.0284	23.713	AT1G24265	2	112	GTAG	GTAG	Protein of unknown function (DUF1664)	Protein of unknown function (DUF1664); FUNCTIONS IN: molecular_function unknown; INVOLVED IN: biological_process unknown; LOCATED IN: endomembrane system; CONTAINS InterPro DOMAIN/s: Protein of unknown function DUF1664 (InterPro:IPR012458); BEST Arabidopsis thaliana protein match is: Protein of unknown function (DUF1664) (TAIR:AT1G24267.1)	Protein of unknown function DUF1664
194.942	33.2986	AT1G24267	13	456	GTAG	GTAG	Protein of unknown function (DUF1664)	Protein of unknown function (DUF1664); FUNCTIONS IN: molecular_function unknown; INVOLVED IN: biological_process unknown; LOCATED IN: cellular_component unknown; EXPRESSED IN: cultured cell; CONTAINS InterPro DOMAIN/s: Protein of unknown function DUF1664 (InterPro:IPR012458); BEST Arabidopsis thaliana protein match is: Protein of unknown function (DUF1664) (TAIR:AT1G24265.2)	Protein of unknown function DUF1664
3.09351	3.85267	AT1G24310	6	101	GTAG	GTAG		unknown protein; FUNCTIONS IN: molecular_function unknown; INVOLVED IN: biological_process unknown; LOCATED IN: nucleolus; EXPRESSED IN: 20 plant structures; EXPRESSED DURING: 13 growth stages	Nucleoporin Nup54, alpha-helical domain | Nucleoporin Nup54/Nup57/Nup44
8.99029	6.24067	AT1G24706	28	123	GTAG	GTAG	THO2	THO2; FUNCTIONS IN: molecular_function unknown; INVOLVED IN: biological_process unknown; LOCATED IN: cellular_component unknown; EXPRESSED IN: 23 plant structures; EXPRESSED IN: 24 plant structures; EXPRESSED DURING: 13 growth stages; CONTAINS InterPro DOMAIN/s: THO complex, subunitTHOC2, C-region (InterPro:IPR021418), THO complex, subunitTHOC2, N-region (InterPro:IPR021726)	Signal transduction histidine kinase EnvZ-like, dimerisation/phosphoacceptor domain | THO complex, subunitTHOC2, C-terminal | THO complex, subunitTHOC2, N-terminal
37.4029	22.2125	AT1G24706	27	199	GTAG	GTAG	THO2	THO2; FUNCTIONS IN: molecular_function unknown; INVOLVED IN: biological_process unknown; LOCATED IN: cellular_component unknown; EXPRESSED IN: 23 plant structures; EXPRESSED IN: 24 plant structures; EXPRESSED DURING: 13 growth stages; CONTAINS InterPro DOMAIN/s: THO complex, subunitTHOC2, C-region (InterPro:IPR021418), THO complex, subunitTHOC2, N-region (InterPro:IPR021726)	Signal transduction histidine kinase EnvZ-like, dimerisation/phosphoacceptor domain | THO complex, subunitTHOC2, C-terminal | THO complex, subunitTHOC2, N-terminal
3.09836	3.04144	AT1G26090	4	88	GTAG	GTAG	P-loop containing nucleoside triphosphate hydrolases superfamily protein	P-loop containing nucleoside triphosphate hydrolases superfamily protein; LOCATED IN: chloroplast, plastoglobule; EXPRESSED IN: 22 plant structures; EXPRESSED DURING: 13 growth stages	Anion-transporting ATPase-like domain | Arsenical pump ATPase, ArsA/GET3 | P-loop containing nucleoside triphosphate hydrolase
32.9604	13.8644	AT1G26150	6	75	GTAG	GTAG	proline-rich extensin-like receptor kinase 10	proline-rich extensin-like receptor kinase 10 (PERK10); FUNCTIONS IN: protein serine/threonine kinase activity, protein kinase activity, ATP binding; INVOLVED IN: protein amino acid phosphorylation; LOCATED IN: plasma membrane; EXPRESSED IN: 22 plant structures; EXPRESSED DURING: 13 growth stages; CONTAINS InterPro DOMAIN/s: Protein kinase, ATP binding site (InterPro:IPR017441), Serine/threonine-…	Concanavalin A-like lectin/glucanase, subgroup | Protein kinase domain | Protein kinase, ATP binding site | Protein kinase-like domain | Serine/threonine-protein kinase, active site
3.05047	3.12494	AT1G26170	12	106	GTAG	GTAG	ARM repeat superfamily protein	ARM repeat superfamily protein; FUNCTIONS IN: protein transporter activity, binding; INVOLVED IN: intracellular protein transport, protein import into nucleus, docking; LOCATED IN: nucleus, nuclear pore, cytoplasm; EXPRESSED IN: 22 plant structures; EXPRESSED DURING: 13 growth stages; CONTAINS InterPro DOMAIN/s: Importin-beta, N-terminal (InterPro:IPR001494), Armadillo-like helical (InterPro:IPR0…	Armadillo-like helical | Armadillo-type fold | Importin-beta, N-terminal domain
2.71811	2.41241	AT1G26440	3	73	GTAG	GTAG	ureide permease 5	ureide permease 5 (UPS5); FUNCTIONS IN: xanthine transmembrane transporter activity, uracil transmembrane transporter activity, allantoin uptake transmembrane transporter activity; LOCATED IN: endomembrane system; EXPRESSED IN: 31 plant structures; INVOLVED IN: xanthine transport, uracil transport, allantoin transport; EXPRESSED DURING: 13 growth stages; BEST Arabidopsis thaliana protein match is…	Ureide permease
10.1117	6.69664	AT1G26520	4	96	GTAG	GTAG	Cobalamin biosynthesis CobW-like protein	Cobalamin biosynthesis CobW-like protein; CONTAINS InterPro DOMAIN/s: Cobalamin (vitamin B12) biosynthesis CobW-like (InterPro:IPR003495), Cobalamin (vitamin B12) biosynthesis CobW-like, C-terminal (InterPro:IPR011629); BEST Arabidopsis thaliana protein match is: Cobalamin biosynthesis CobW-like protein (TAIR:AT1G15730.1)	CobW/HypB/UreG domain | Cobalamin (vitamin B12) biosynthesis CobW-like, C-terminal | P-loop containing nucleoside triphosphate hydrolase
2.97519	2.39196	AT1G26580	1	112	GTAG	GTAG		FUNCTIONS IN: molecular_function unknown; INVOLVED IN: biological_process unknown; LOCATED IN: cellular_component unknown; EXPRESSED IN: 24 plant structures; EXPRESSED DURING: 15 growth stages; BEST Arabidopsis thaliana protein match is: ELM2 domain-containing protein (TAIR:AT2G03470.1)
15.8545	24.2955	AT1G27150	10	83	GTAG	GTAG	Tetratricopeptide repeat (TPR)-like superfamily protein	Tetratricopeptide repeat (TPR)-like superfamily protein; FUNCTIONS IN: binding; INVOLVED IN: biological_process unknown; LOCATED IN: cellular_component unknown; EXPRESSED IN: 23 plant structures; EXPRESSED DURING: 13 growth stages; CONTAINS InterPro DOMAIN/s: Tetratricopeptide-like helical (InterPro:IPR011990); BEST Arabidopsis thaliana protein match is: Tetratricopeptide repeat (TPR)-like superf…	Tetratricopeptide-like helical domain
3.5446	2.28383	AT1G27300	1	268	GTAG	GTAG		unknown protein
20.3776	35.0671	AT1G27320	3	88	GTAG	GTAG	histidine kinase 3	histidine kinase 3 (HK3); CONTAINS InterPro DOMAIN/s: Signal transduction histidine kinase, homodimeric (InterPro:IPR009082), CHASE (InterPro:IPR006189), Signal transduction histidine kinase, core (InterPro:IPR005467), ATPase-like, ATP-binding domain (InterPro:IPR003594), CheY-like (InterPro:IPR011006), Signal transduction response regulator, receiver domain (InterPro:IPR001789), Signal transduct…	CHASE | CheY-like superfamily | Histidine kinase-like ATPase, C-terminal domain | Signal transduction histidine kinase EnvZ-like, dimerisation/phosphoacceptor domain | Signal transduction histidine kinase, core | Signal transduction histidine kinase, homodimeric domain | Signal transduction histidine kinase-related protein, C-terminal | Signal transduction response regulator, receiver domain
7.27653	6.4036	AT1G27510	3	87	GTAG	GTAG	Protein of unknown function (DUF3506)	FUNCTIONS IN: DNA binding, nuclease activity; INVOLVED IN: response to singlet oxygen; LOCATED IN: thylakoid membrane; EXPRESSED IN: 22 plant structures; EXPRESSED DURING: 13 growth stages; CONTAINS InterPro DOMAIN/s: Protein of unknown function DUF3506 (InterPro:IPR021894), UvrB/UvrC protein (InterPro:IPR001943); BEST Arabidopsis thaliana protein match is: Protein of unknown function (DUF3506) (…	Protein of unknown function DUF3506 | UVR domain
5.35453	6.08242	AT1G27520	13	85	GTAG	GTAG	Glycosyl hydrolase family 47 protein	Glycosyl hydrolase family 47 protein; FUNCTIONS IN: mannosyl-oligosaccharide 1,2-alpha-mannosidase activity, alpha-mannosidase activity, calcium ion binding; INVOLVED IN: protein amino acid N-linked glycosylation; LOCATED IN: endomembrane system, membrane; EXPRESSED IN: 22 plant structures; EXPRESSED DURING: 13 growth stages; CONTAINS InterPro DOMAIN/s: Glycoside hydrolase, family 47 (InterPro:IP…	Glycoside hydrolase, family 47
15.6626	22.3802	AT1G27752	3	809	GTAG	GTAG	Ubiquitin system component Cue protein	Ubiquitin system component Cue protein; FUNCTIONS IN: molecular_function unknown; INVOLVED IN: biological_process unknown; CONTAINS InterPro DOMAIN/s: Ubiquitin system component Cue (InterPro:IPR003892); LOCATED IN: chloroplast	UBA-like | Ubiquitin system component Cue
13.1808	14.4575	AT1G27840	2	109	GTAG	GTAG	Transducin/WD40 repeat-like superfamily protein	ATCSA-1; CONTAINS InterPro DOMAIN/s: WD40 repeat 2 (InterPro:IPR019782), WD40 repeat, conserved site (InterPro:IPR019775), WD40 repeat (InterPro:IPR001680), G-protein beta WD-40 repeat, region (InterPro:IPR020472), WD40 repeat-like-containing domain (InterPro:IPR011046), WD40-repeat-containing domain (InterPro:IPR017986), WD40/YVTN repeat-like-containing domain (InterPro:IPR015943), WD40 repeat, …	G-protein beta WD-40 repeat | WD40 repeat | WD40 repeat, conserved site | WD40-repeat-containing domain | WD40/YVTN repeat-like-containing domain
10.6569	5.13927	AT1G28100	4	74	GTAG	GTAG		unknown protein; FUNCTIONS IN: molecular_function unknown; INVOLVED IN: biological_process unknown; LOCATED IN: cellular_component unknown; EXPRESSED IN: 22 plant structures; EXPRESSED DURING: 13 growth stages	Acetoacetate decarboxylase beta barrel domain
8.08497	3.67472	AT1G28120	2	264	GTAG	GTAG		CONTAINS InterPro DOMAIN/s: Ovarian tumour, otubain (InterPro:IPR003323), Ubiquitin thioesterase Otubain (InterPro:IPR016615), Peptidase C65, otubain (InterPro:IPR019400)	Ovarian tumour, otubain | Peptidase C65, otubain | Ubiquitin thioesterase Otubain
5.80633	9.27178	AT1G29330	5	399	GTAG	GTAG	ER lumen protein retaining receptor family protein	ENDOPLASMIC RETICULUM RETENTION DEFECTIVE 2 (ERD2); CONTAINS InterPro DOMAIN/s: ER lumen protein retaining receptor (InterPro:IPR000133); BEST Arabidopsis thaliana protein match is: endoplasmic reticulum retention defective 2B (TAIR:AT3G25040.1)	ER lumen protein retaining receptor
5.52883	2.6845	AT1G29470	1	90	GTAG	GTAG	S-adenosyl-L-methionine-dependent methyltransferases superfamily protein	S-adenosyl-L-methionine-dependent methyltransferases superfamily protein; INVOLVED IN: biological_process unknown; LOCATED IN: Golgi apparatus; EXPRESSED IN: 25 plant structures; EXPRESSED DURING: 14 growth stages; CONTAINS InterPro DOMAIN/s: Protein of unknown function DUF248, methyltransferase putative (InterPro:IPR004159); BEST Arabidopsis thaliana protein match is: S-adenosyl-L-methionine-dep…	Putative S-adenosyl-L-methionine-dependent methyltransferase | S-adenosyl-L-methionine-dependent methyltransferase-like
3.24654	3.05625	AT1G29660	3	188	GTAG	GTAG	GDSL-like Lipase/Acylhydrolase superfamily protein	GDSL-like Lipase/Acylhydrolase superfamily protein; FUNCTIONS IN: hydrolase activity, acting on ester bonds, carboxylesterase activity; INVOLVED IN: lipid metabolic process; LOCATED IN: apoplast, nucleus; EXPRESSED IN: 19 plant structures; EXPRESSED DURING: 10 growth stages; CONTAINS InterPro DOMAIN/s: Lipase, GDSL (InterPro:IPR001087); BEST Arabidopsis thaliana protein match is: GDSL-like Lipase…	Lipase, GDSL | SGNH hydrolase-type esterase domain
4.67246	3.77118	AT1G29880	2	95	GTAG	GTAG	glycyl-tRNA synthetase / glycine--tRNA ligase	glycyl-tRNA synthetase / glycine--tRNA ligase; FUNCTIONS IN: glycine-tRNA ligase activity, nucleotide binding, aminoacyl-tRNA ligase activity, ATP binding; INVOLVED IN: response to cadmium ion, glycyl-tRNA aminoacylation; LOCATED IN: mitochondrion; EXPRESSED IN: 24 plant structures; EXPRESSED DURING: 14 growth stages; CONTAINS InterPro DOMAIN/s: Aminoacyl-tRNA synthetase, class II (G/ H/ P/ S), c…	Aminoacyl-tRNA synthetase, class II | Aminoacyl-tRNA synthetase, class II (G/ H/ P/ S), conserved domain | Anticodon-binding | Glycyl-tRNA synthetase | Glycyl-tRNA synthetase/DNA polymerase subunit gamma-2 | S15/NS1, RNA-binding | WHEP-TRS
2.98742	3.82588	AT1G30120	1	707	GTAG	GTAG	pyruvate dehydrogenase E1 beta	pyruvate dehydrogenase E1 beta (PDH-E1 BETA); FUNCTIONS IN: pyruvate dehydrogenase (acetyl-transferring) activity; INVOLVED IN: fatty acid biosynthetic process; LOCATED IN: plastid pyruvate dehydrogenase complex, chloroplast, chloroplast envelope; EXPRESSED IN: 23 plant structures; EXPRESSED DURING: 15 growth stages; CONTAINS InterPro DOMAIN/s: Transketolase, C-terminal (InterPro:IPR005476), Tran…	Thiamin diphosphate-binding fold | Transketolase, C-terminal | Transketolase, C-terminal/Pyruvate-ferredoxin oxidoreductase, domain II | Transketolase-like, pyrimidine-binding domain
5.31041	2.68947	AT1G30410	26	142	GTAG	GTAG	multidrug resistance-associated protein 13	multidrug resistance-associated protein 13 (MRP13); FUNCTIONS IN: ATPase activity, coupled to transmembrane movement of substances; INVOLVED IN: transport, transmembrane transport; LOCATED IN: integral to membrane; CONTAINS InterPro DOMAIN/s: ATPase, AAA+ type, core (InterPro:IPR003593), ABC transporter-like (InterPro:IPR003439), ABC transporter, transmembrane domain, type 1 (InterPro:IPR011527),…
2.55445	2.74212	AT1G30480	1	945	GTAG	GTAG	D111/G-patch domain-containing protein	DNA-DAMAGE-REPAIR/TOLERATION PROTEIN 111 (DRT111); FUNCTIONS IN: nucleotide binding, nucleic acid binding; INVOLVED IN: DNA repair; LOCATED IN: chloroplast, nucleus, cytoplasm; EXPRESSED IN: 24 plant structures; EXPRESSED DURING: 14 growth stages; CONTAINS InterPro DOMAIN/s: RNA recognition motif, RNP-1 (InterPro:IPR000504), Nucleotide-binding, alpha-beta plait (InterPro:IPR012677), D111/G-patch …	G-patch domain | Nucleotide-binding, alpha-beta plait | RNA recognition motif domain | Splicing factor, SPF45
2.31979	3.01928	AT1G30610	1	196	GTAG	GTAG	pentatricopeptide (PPR) repeat-containing protein	EMBRYO DEFECTIVE 2279 (EMB2279); FUNCTIONS IN: binding; INVOLVED IN: suspensor development, embryo development ending in seed dormancy; INVOLVED IN: embryo development ending in seed dormancy; LOCATED IN: cellular_component unknown; EXPRESSED IN: 22 plant structures; EXPRESSED DURING: 13 growth stages; CONTAINS InterPro DOMAIN/s: Pentatricopeptide repeat (InterPro:IPR002885); CONTAINS InterPro DO…	Pentatricopeptide repeat | Tetratricopeptide-like helical domain
2.58064	3.26827	AT1G30910	4	65	GTAG	GTAG	Molybdenum cofactor sulfurase family protein	Molybdenum cofactor sulfurase family protein; FUNCTIONS IN: molybdenum ion binding, Mo-molybdopterin cofactor sulfurase activity, pyridoxal phosphate binding, catalytic activity; INVOLVED IN: biological_process unknown; LOCATED IN: chloroplast; EXPRESSED IN: 22 plant structures; EXPRESSED DURING: 13 growth stages; CONTAINS InterPro DOMAIN/s: Pyruvate kinase, beta-barrel-like (InterPro:IPR011037),…	MOSC, N-terminal beta barrel | Molybdenum cofactor sulfurase, C-terminal | Pyruvate kinase-like, insert domain
2.80925	3.96179	AT1G31190	3	98	GTAG	GTAG	myo-inositol monophosphatase like 1	myo-inositol monophosphatase like 1 (IMPL1); FUNCTIONS IN: 3'(2'),5'-bisphosphate nucleotidase activity, inositol or phosphatidylinositol phosphatase activity, inositol-1(or 4)-monophosphatase activity; INVOLVED IN: sulfur metabolic process; LOCATED IN: chloroplast, chloroplast stroma; EXPRESSED IN: 22 plant structures; EXPRESSED DURING: 13 growth stages; CONTAINS InterPro DOMAIN/s: Inositol mono…	Inositol monophosphatase | Inositol monophosphatase, conserved site | Inositol monophosphatase, metal-binding site
4.35388	6.05709	AT1G31330	1	263	GTAG	GTAG	photosystem I subunit F	photosystem I subunit F (PSAF); FUNCTIONS IN: molecular_function unknown; INVOLVED IN: photosynthesis; LOCATED IN: in 7 components; EXPRESSED IN: 25 plant structures; EXPRESSED DURING: 14 growth stages; CONTAINS InterPro DOMAIN/s: Photosystem I reaction centre protein PsaF, subunit III (InterPro:IPR003666)	Photosystem I PsaF, reaction centre subunit III
7.408	7.59101	AT1G31360	19	82	GCAG	GCAG	RECQ helicase L2	RECQ helicase L2 (RECQL2); CONTAINS InterPro DOMAIN/s: DNA/RNA helicase, DEAD/DEAH box type, N-terminal (InterPro:IPR011545), RQC domain (InterPro:IPR018982), DNA helicase, ATP-dependent, RecQ type (InterPro:IPR004589), DNA helicase, ATP-dependent, RecQ type, N-terminal (InterPro:IPR018329), DEAD-like helicase, N-terminal (InterPro:IPR014001), DNA/RNA helicase, C-terminal (InterPro:IPR001650), He…
8.58059	5.18517	AT1G31500	1	77	GTAG	GTAG	DNAse I-like superfamily protein	DNAse I-like superfamily protein; FUNCTIONS IN: hydrolase activity; INVOLVED IN: biological_process unknown; LOCATED IN: cellular_component unknown; EXPRESSED IN: 22 plant structures; EXPRESSED DURING: 13 growth stages; CONTAINS InterPro DOMAIN/s: Endonuclease/exonuclease/phosphatase (InterPro:IPR005135); BEST Arabidopsis thaliana protein match is: DNAse I-like superfamily protein (TAIR:AT1G31530…	Endonuclease/exonuclease/phosphatase
2.26736	2.37207	AT1G31812	2	104	GTAG	GTAG	acyl-CoA-binding protein 6	acyl-CoA-binding protein 6 (ACBP6); FUNCTIONS IN: phosphatidylcholine binding, acyl-CoA binding; INVOLVED IN: response to freezing, response to cold, lipid transport; LOCATED IN: cytosol, plasma membrane; EXPRESSED IN: 25 plant structures; EXPRESSED DURING: 16 growth stages; CONTAINS InterPro DOMAIN/s: Acyl-CoA-binding protein, ACBP (InterPro:IPR000582), FERM/acyl-CoA-binding protein, 3-helical b…	Acyl-CoA-binding protein, ACBP | FERM/acyl-CoA-binding protein, 3-helical bundle
9.40701	11.2148	AT1G31910	8	75	GTAG	GTAG	GHMP kinase family protein	GHMP kinase family protein; FUNCTIONS IN: kinase activity, ATP binding; INVOLVED IN: phosphorylation; EXPRESSED IN: 24 plant structures; EXPRESSED DURING: 15 growth stages; CONTAINS InterPro DOMAIN/s: Phosphomevalonate kinase, eukaryotic (InterPro:IPR005916), Phosphomevalonate kinase, ERG8 (InterPro:IPR016005), Ribosomal protein S5 domain 2-type fold (InterPro:IPR020568), GHMP kinase (InterPro:IP…	GHMP kinase N-terminal domain | GHMP kinase, C-terminal domain | Phosphomevalonate kinase, ERG8 | Phosphomevalonate kinase, eukaryotic | Ribosomal protein S5 domain 2-type fold | Ribosomal protein S5 domain 2-type fold, subgroup
54.6221	37.1116	AT1G31910	6	93	GCAG	GCAG	GHMP kinase family protein	GHMP kinase family protein; FUNCTIONS IN: kinase activity, ATP binding; INVOLVED IN: phosphorylation; EXPRESSED IN: 24 plant structures; EXPRESSED DURING: 15 growth stages; CONTAINS InterPro DOMAIN/s: Phosphomevalonate kinase, eukaryotic (InterPro:IPR005916), Phosphomevalonate kinase, ERG8 (InterPro:IPR016005), Ribosomal protein S5 domain 2-type fold (InterPro:IPR020568), GHMP kinase (InterPro:IP…	GHMP kinase N-terminal domain | GHMP kinase, C-terminal domain | Phosphomevalonate kinase, ERG8 | Phosphomevalonate kinase, eukaryotic | Ribosomal protein S5 domain 2-type fold | Ribosomal protein S5 domain 2-type fold, subgroup
5.30416	7.72964	AT1G32130	3	92	GTAG	GTAG	Transcription elongation factor (TFIIS) family protein	IWS1; FUNCTIONS IN: molecular_function unknown; INVOLVED IN: brassinosteroid mediated signaling pathway, regulation of RNA elongation; LOCATED IN: cellular_component unknown; EXPRESSED IN: 24 plant structures; EXPRESSED IN: 25 plant structures; EXPRESSED DURING: 15 growth stages; CONTAINS InterPro DOMAIN/s: Transcription factor IIS, N-terminal (InterPro:IPR017923); BEST Arabidopsis thaliana prote…	Transcription factor IIS, N-terminal
3.56647	4.87937	AT1G32200	7	103	GTAG	GTAG	phospholipid/glycerol acyltransferase family protein	ATS1; FUNCTIONS IN: glycerol-3-phosphate O-acyltransferase activity; INVOLVED IN: phosphatidylglycerol biosynthetic process; LOCATED IN: chloroplast stroma, chloroplast, plastid; EXPRESSED IN: 22 plant structures; EXPRESSED DURING: 14 growth stages; CONTAINS InterPro DOMAIN/s: Phospholipid/glycerol acyltransferase (InterPro:IPR002123), Glycerol-3-phosphate O-acyltransferase (InterPro:IPR016222)	Glycerol-3-phosphate O-acyltransferase, alpha helical bundle, N-terminal | Glycerol-3-phosphate O-acyltransferase, chloroplast | Phospholipid/glycerol acyltransferase
396.538	11.6295	AT1G32240	5	96	GTAG	GTAG	Homeodomain-like superfamily protein	KANADI 2 (KAN2); CONTAINS InterPro DOMAIN/s: Homeodomain-like (InterPro:IPR009057), Myb, DNA-binding (InterPro:IPR014778), Myb-like DNA-binding domain, SHAQKYF class (InterPro:IPR006447), Homeodomain-related (InterPro:IPR012287); BEST Arabidopsis thaliana protein match is: Homeodomain-like superfamily protein (TAIR:AT4G17695.1)	Homeodomain-like | Myb domain, plants | SANT/Myb domain
6.27522	5.61373	AT1G33040	3	94	GTAG	GTAG	nascent polypeptide-associated complex subunit alpha-like protein 5	nascent polypeptide-associated complex subunit alpha-like protein 5 (NACA5); CONTAINS InterPro DOMAIN/s: Nascent polypeptide-associated complex, alpha subunit (InterPro:IPR016641), Nascent polypeptide-associated complex NAC (InterPro:IPR002715); BEST Arabidopsis thaliana protein match is: Nascent polypeptide-associated complex (NAC), alpha subunit family protein (TAIR:AT4G10480.2)	Nascent polypeptide-associated complex NAC domain | Nascent polypeptide-associated complex subunit alpha
14.189	7.25759	AT1G33110	4	86	GTAG	GTAG	MATE efflux family protein	MATE efflux family protein; FUNCTIONS IN: antiporter activity, drug transmembrane transporter activity, transporter activity; INVOLVED IN: drug transmembrane transport, transmembrane transport; LOCATED IN: membrane; EXPRESSED IN: 22 plant structures; EXPRESSED DURING: 13 growth stages; CONTAINS InterPro DOMAIN/s: Multi antimicrobial extrusion protein MatE (InterPro:IPR002528); BEST Arabidopsis th…	Multi antimicrobial extrusion protein
26.9673	25.8582	AT1G33230	7	87	GTAG	GTAG	TMPIT-like protein	TMPIT-like protein; FUNCTIONS IN: molecular_function unknown; INVOLVED IN: biological_process unknown; LOCATED IN: integral to membrane; EXPRESSED IN: 22 plant structures; EXPRESSED DURING: 13 growth stages; CONTAINS InterPro DOMAIN/s: TMPIT-like (InterPro:IPR012926); BEST Arabidopsis thaliana protein match is: TMPIT-like protein (TAIR:AT4G10430.3)	TMPIT-like
7.45607	6.83193	AT1G33290	1	66	GTAG	GTAG	P-loop containing nucleoside triphosphate hydrolases superfamily protein	P-loop containing nucleoside triphosphate hydrolases superfamily protein; BEST Arabidopsis thaliana protein match is: P-loop containing nucleoside triphosphate hydrolases superfamily protein (TAIR:AT1G73170.1); FUNCTIONS IN: nucleoside-triphosphatase activity, nucleotide binding, ATP binding; EXPRESSED IN: 23 plant structures; EXPRESSED DURING: 15 growth stages; CONTAINS InterPro DOMAIN/s: ATPase…	AAA+ ATPase domain | ATPase, AAA-type, core | P-loop containing nucleoside triphosphate hydrolase
10.4692	6.27315	AT1G33290	2	88	GTAG	GTAG	P-loop containing nucleoside triphosphate hydrolases superfamily protein	P-loop containing nucleoside triphosphate hydrolases superfamily protein; BEST Arabidopsis thaliana protein match is: P-loop containing nucleoside triphosphate hydrolases superfamily protein (TAIR:AT1G73170.1); FUNCTIONS IN: nucleoside-triphosphatase activity, nucleotide binding, ATP binding; EXPRESSED IN: 23 plant structures; EXPRESSED DURING: 15 growth stages; CONTAINS InterPro DOMAIN/s: ATPase…	AAA+ ATPase domain | ATPase, AAA-type, core | P-loop containing nucleoside triphosphate hydrolase
215.438	11.4146	AT1G33410	13	124	GTAG	GTAG	SUPPRESSOR OF AUXIN RESISTANCE1	SUPPRESSOR OF AUXIN RESISTANCE1 (SAR1); INVOLVED IN: mRNA export from nucleus, response to auxin stimulus, developmental process; LOCATED IN: nuclear membrane; EXPRESSED IN: 21 plant structures; EXPRESSED DURING: 13 growth stages; CONTAINS InterPro DOMAIN/s: Nucleoporin Nup120/160 (InterPro:IPR021717)	Nucleoporin Nup120/160
9.6827	5.57124	AT1G33980	11	86	GCAG	GCAG	Smg-4/UPF3 family protein	UPF3; FUNCTIONS IN: nucleotide binding; INVOLVED IN: nuclear-transcribed mRNA catabolic process, nonsense-mediated decay; LOCATED IN: cellular_component unknown; EXPRESSED IN: 24 plant structures; EXPRESSED DURING: 15 growth stages; CONTAINS InterPro DOMAIN/s: Nucleotide-binding, alpha-beta plait (InterPro:IPR012677), Regulator of nonsense-mediated decay, UPF3 (InterPro:IPR005120)	Nucleotide-binding, alpha-beta plait | Regulator of nonsense-mediated decay, UPF3
5.87011	6.81155	AT1G33990	1	659	GTAG	GTAG	methyl esterase 14	methyl esterase 14 (MES14); FUNCTIONS IN: hydrolase activity; LOCATED IN: plasma membrane; EXPRESSED IN: 23 plant structures; EXPRESSED DURING: 13 growth stages; CONTAINS InterPro DOMAIN/s: Alpha/beta hydrolase fold-1 (InterPro:IPR000073); BEST Arabidopsis thaliana protein match is: methyl esterase 12 (TAIR:AT4G09900.1)	Alpha/Beta hydrolase fold
5.59559	8.0722	AT1G34120	4	176	GTAG	GTAG	inositol polyphosphate 5-phosphatase I	MYO-INOSITOL POLYPHOSPHATE 5-PHOSPHATASE 1 (AT5PTASE1); inositol polyphosphate 5-phosphatase I (IP5PI); CONTAINS InterPro DOMAIN/s: Inositol polyphosphate related phosphatase (InterPro:IPR000300), Endonuclease/exonuclease/phosphatase (InterPro:IPR005135); BEST Arabidopsis thaliana protein match is: DNAse I-like superfamily protein (TAIR:AT1G71710.1); BEST Arabidopsis thaliana protein match is: DN…	Endonuclease/exonuclease/phosphatase | Inositol polyphosphate-related phosphatase
2.0646	2.94207	AT1G34245	2	191	GTAG	GTAG	Putative membrane lipoprotein	EPIDERMAL PATTERNING FACTOR 2 (EPF2); FUNCTIONS IN: molecular_function unknown; INVOLVED IN: stomatal complex development, guard cell differentiation; LOCATED IN: endomembrane system; EXPRESSED IN: 15 plant structures; EXPRESSED DURING: 9 growth stages; BEST Arabidopsis thaliana protein match is: unknown protein (TAIR:AT1G71866.1)
4.13803	3.59296	AT1G34630	2	114	GCAG	GCAG		FUNCTIONS IN: molecular_function unknown; INVOLVED IN: biological_process unknown; LOCATED IN: cellular_component unknown; EXPRESSED IN: 25 plant structures; EXPRESSED DURING: 15 growth stages; BEST Arabidopsis thaliana protein match is: Mitochondrial import inner membrane translocase subunit Tim17/Tim22/Tim23 family protein (TAIR:AT5G51150.1)
9.9797	5.49333	AT1G34770	4	749	GTAG	GTAG		CONTAINS InterPro DOMAIN/s: MAGE protein (InterPro:IPR002190)	MAGE protein
4.51292	3.88713	AT1G35320	5	112	GTAG	GTAG		unknown protein; BEST Arabidopsis thaliana protein match is: unknown protein (TAIR:AT3G30160.1)
4.10172	4.10491	AT1G35580	1	118	TTAG	TTAG	cytosolic invertase 1	cytosolic invertase 1 (CINV1); FUNCTIONS IN: protein binding, beta-fructofuranosidase activity; INVOLVED IN: carbohydrate metabolic process, sucrose catabolic process, using invertase or sucrose synthase, root development, cellular amino acid metabolic process; LOCATED IN: cytosol, nucleus, plasma membrane, membrane; EXPRESSED IN: 21 plant structures; EXPRESSED DURING: 13 growth stages; CONTAINS …	Glycosyl hydrolase family 100 | Six-hairpin glycosidase-like
12.888	18.5498	AT1G35780	2	83	GTAG	GTAG		unknown protein; BEST Arabidopsis thaliana protein match is: unknown protein (TAIR:AT1G78150.2)	Domain of unknown function DUF4057
126.079	247.626	AT1G42470	1	97	GTAG	GTAG	Patched family protein	Patched family protein; FUNCTIONS IN: hedgehog receptor activity; LOCATED IN: plasma membrane, membrane; EXPRESSED IN: 24 plant structures; EXPRESSED DURING: 14 growth stages; CONTAINS InterPro DOMAIN/s: Niemann-Pick C type protein (InterPro:IPR004765), Patched (InterPro:IPR003392), Sterol-sensing 5TM box (InterPro:IPR000731); BEST Arabidopsis thaliana protein match is: Patched family protein (TA…	Niemann-Pick C type protein | Patched | Sterol-sensing domain
6.66907	4.76526	AT1G42480	6	124	AAAG	AAAG		unknown protein; FUNCTIONS IN: molecular_function unknown; INVOLVED IN: biological_process unknown; LOCATED IN: endomembrane system; EXPRESSED IN: 24 plant structures; EXPRESSED DURING: 13 growth stages; CONTAINS InterPro DOMAIN/s: Protein of unknown function DUF3456 (InterPro:IPR021852)	Domain of unknown function DUF3456
4.85002	4.25248	AT1G43130	6	814	GTAG	GTAG	like COV 2	like COV 2 (LCV2); CONTAINS InterPro DOMAIN/s: Protein of unknown function DUF502 (InterPro:IPR007462); BEST Arabidopsis thaliana protein match is: Protein of unknown function (DUF502) (TAIR:AT2G20120.1)	Protein of unknown function DUF502
6.47713	7.70453	AT1G43700	2	457	GTAG	GTAG	VIRE2-interacting protein 1	VIRE2-interacting protein 1 (VIP1); FUNCTIONS IN: protein binding, sequence-specific DNA binding transcription factor activity; INVOLVED IN: cellular response to sulfate starvation, sulfate transport, DNA mediated transformation, nuclear import; LOCATED IN: nucleus; EXPRESSED IN: 23 plant structures; EXPRESSED DURING: 13 growth stages; CONTAINS InterPro DOMAIN/s: Basic-leucine zipper (bZIP) trans…	Basic-leucine zipper domain
23.7847	8.89291	AT1G43710	1	85	GTAG	GTAG	Pyridoxal phosphate (PLP)-dependent transferases superfamily protein	embryo defective 1075 (emb1075); FUNCTIONS IN: pyridoxal phosphate binding, carboxy-lyase activity, catalytic activity; INVOLVED IN: cellular amino acid metabolic process, embryo development ending in seed dormancy; LOCATED IN: cellular_component unknown; EXPRESSED IN: 25 plant structures; EXPRESSED DURING: 15 growth stages; CONTAINS InterPro DOMAIN/s: Pyridoxal phosphate-dependent transferase, m…	Pyridoxal phosphate-dependent decarboxylase | Pyridoxal phosphate-dependent transferase | Pyridoxal phosphate-dependent transferase, major region, subdomain 1 | Pyridoxal-phosphate binding site
3.14587	5.83549	AT1G44446	1	88	GTAG	GTAG	Pheophorbide a oxygenase family protein with Rieske [2Fe-2S] domain	CHLORINA 1 (CH1); CONTAINS InterPro DOMAIN/s: Aromatic-ring-hydroxylating dioxygenase, 2Fe-2S-binding site (InterPro:IPR015881), Rieske [2Fe-2S] iron-sulphur domain (InterPro:IPR017941); CONTAINS InterPro DOMAIN/s: Aromatic-ring-hydroxylating dioxygenase, 2Fe-2S-binding site (InterPro:IPR015881), Rieske [2Fe-2S] iron-sulphur domain (InterPro:IPR017941), Pheophorbide a oxygenase (InterPro:IPR01362…	Aromatic-ring-hydroxylating dioxygenase, 2Fe-2S-binding site | Pheophorbide a oxygenase | Rieske [2Fe-2S] iron-sulphur domain
54.7302	33.6586	AT1G45000	6	94	GTAG	GTAG	AAA-type ATPase family protein	AAA-type ATPase family protein; FUNCTIONS IN: hydrolase activity, nucleoside-triphosphatase activity, ATPase activity, nucleotide binding, ATP binding; FUNCTIONS IN: nucleoside-triphosphatase activity, ATPase activity, nucleotide binding, ATP binding; INVOLVED IN: protein catabolic process; LOCATED IN: proteasome complex, plasma membrane, membrane; EXPRESSED IN: 22 plant structures; LOCATED IN: p…	26S proteasome subunit P45 | AAA+ ATPase domain | ATPase, AAA-type, conserved site | ATPase, AAA-type, core | P-loop containing nucleoside triphosphate hydrolase
2.56497	3.16766	AT1G45231	7	111	GTAG	GTAG	S-adenosyl-L-methionine-dependent methyltransferases superfamily protein	S-adenosyl-L-methionine-dependent methyltransferases superfamily protein; FUNCTIONS IN: methyltransferase activity; INVOLVED IN: RNA capping, RNA methylation; LOCATED IN: cellular_component unknown; CONTAINS InterPro DOMAIN/s: WW/Rsp5/WWP (InterPro:IPR001202), RNA cap guanine-N2 methyltransferase (InterPro:IPR019012); BEST Arabidopsis thaliana protein match is: S-adenosyl-L-methionine-dependent m…	RNA cap guanine-N2 methyltransferase | S-adenosyl-L-methionine-dependent methyltransferase-like | WW domain
3.50331	5.33719	AT1G48140	1	1238	GTAG	GTAG	dolichol-phosphate mannosyltransferase-related	dolichol-phosphate mannosyltransferase-related; FUNCTIONS IN: molecular_function unknown; INVOLVED IN: biological_process unknown; LOCATED IN: endomembrane system; EXPRESSED IN: 24 plant structures; EXPRESSED DURING: 15 growth stages; CONTAINS InterPro DOMAIN/s: Dolichol-phosphate mannosyltransferase subunit 3 (InterPro:IPR013174)	Dolichol-phosphate mannosyltransferase subunit 3
9.69494	8.76353	AT1G48460	2	87	GTAG	GTAG		unknown protein; FUNCTIONS IN: molecular_function unknown; INVOLVED IN: biological_process unknown; LOCATED IN: chloroplast envelope; EXPRESSED IN: 21 plant structures; EXPRESSED DURING: 13 growth stages; BEST Arabidopsis thaliana protein match is: unknown protein (TAIR:AT5G63040.1)
3.1688	2.39864	AT1G48520	2	89	GTAG	GTAG	GLU-ADT subunit B	GLU-ADT subunit B (GATB); FUNCTIONS IN: glutaminyl-tRNA synthase (glutamine-hydrolyzing) activity, carbon-nitrogen ligase activity, with glutamine as amido-N-donor, ligase activity; INVOLVED IN: glutamyl-tRNA aminoacylation, translation; LOCATED IN: chloroplast; LOCATED IN: chloroplast, chloroplast stroma; EXPRESSED IN: 21 plant structures; EXPRESSED DURING: 13 growth stages; CONTAINS InterPro DO…	Asn/Gln amidotransferase | Aspartyl/Glutamyl-tRNA(Gln) amidotransferase, subunit B/E, catalytic | Aspartyl/glutamyl-tRNA amidotransferase subunit B-related | Aspartyl/glutamyl-tRNA(Asn/Gln) amidotransferase, B subunit | Aspartyl/glutamyl-tRNA(Asn/Gln) amidotransferase, subunit B /E | Glutamyl-tRNA(Gln) amidotransferase, subunit B, conserved site
7.45028	4.16285	AT1G48550	4	83	GTAG	GTAG	Vacuolar protein sorting-associated protein 26	Vacuolar protein sorting-associated protein 26; FUNCTIONS IN: molecular_function unknown; INVOLVED IN: intracellular protein transport, vacuolar transport, retrograde transport, endosome to Golgi; LOCATED IN: retromer complex; EXPRESSED IN: 22 plant structures; EXPRESSED DURING: 13 growth stages; CONTAINS InterPro DOMAIN/s: Vacuolar protein sorting-associated protein 26 (InterPro:IPR005377)	Immunoglobulin E-set | Vacuolar protein sorting protein 26 related
3.90905	6.26765	AT1G48635	1	180	GTAG	GTAG	peroxin 3	peroxin 3 (PEX3); FUNCTIONS IN: molecular_function unknown; INVOLVED IN: peroxisome organization; LOCATED IN: mitochondrion, peroxisome, integral to peroxisomal membrane; CONTAINS InterPro DOMAIN/s: Peroxin-3 (InterPro:IPR006966); BEST Arabidopsis thaliana protein match is: peroxin 3-1 (TAIR:AT3G18160.1)	Peroxin-3
3.38452	23.9844	AT1G48790	10	179	GTAG	GTAG	associated molecule with the SH3 domain of STAM 1	associated molecule with the SH3 domain of STAM 1 (AMSH1); CONTAINS InterPro DOMAIN/s: Mov34/MPN/PAD-1 (InterPro:IPR000555); BEST Arabidopsis thaliana protein match is: associated molecule with the SH3 domain of STAM 3 (TAIR:AT4G16144.1)	JAB1/MPN/MOV34 metalloenzyme domain | USP8 dimerisation domain
19.4618	3.50957	AT1G48790	13	445	GTAG	GTAG	associated molecule with the SH3 domain of STAM 1	associated molecule with the SH3 domain of STAM 1 (AMSH1); CONTAINS InterPro DOMAIN/s: Mov34/MPN/PAD-1 (InterPro:IPR000555); BEST Arabidopsis thaliana protein match is: associated molecule with the SH3 domain of STAM 3 (TAIR:AT4G16144.1)	JAB1/MPN/MOV34 metalloenzyme domain | USP8 dimerisation domain
11.0137	19.1327	AT1G48830	3	113	GTAG	GTAG	Ribosomal protein S7e family protein	Ribosomal protein S7e family protein; FUNCTIONS IN: structural constituent of ribosome; INVOLVED IN: translation; LOCATED IN: cytosolic small ribosomal subunit, cytosolic ribosome, cell wall, plasma membrane, chloroplast; EXPRESSED IN: 23 plant structures; EXPRESSED DURING: 13 growth stages; CONTAINS InterPro DOMAIN/s: Ribosomal protein S7e (InterPro:IPR000554); BEST Arabidopsis thaliana protein …	Ribosomal protein S7e
3.6623	2.79117	AT1G48840	4	75	GTAG	GTAG	Plant protein of unknown function (DUF639)	Plant protein of unknown function (DUF639); CONTAINS InterPro DOMAIN/s: Protein of unknown function DUF639 (InterPro:IPR006927); BEST Arabidopsis thaliana protein match is: Plant protein of unknown function (DUF639) (TAIR:AT3G18350.1)	Protein of unknown function DUF639
4.48678	7.33639	AT1G49380	7	151	GTAG	GTAG	cytochrome c biogenesis protein family	cytochrome c biogenesis protein family; FUNCTIONS IN: molecular_function unknown; INVOLVED IN: cytochrome complex assembly; LOCATED IN: chloroplast; EXPRESSED IN: 22 plant structures; EXPRESSED DURING: 13 growth stages; CONTAINS InterPro DOMAIN/s: ResB-like (InterPro:IPR007816)	Cytochrome c biogenesis protein Ccs1/CcsB | ResB-like domain
2.92158	3.56589	AT1G49510	3	127	GTAG	GTAG	embryo defective 1273	embryo defective 1273 (emb1273)
7.76615	10.834	AT1G49980	3	80	GTAG	GTAG	DNA/RNA polymerases superfamily protein	DNA/RNA polymerases superfamily protein; FUNCTIONS IN: damaged DNA binding, DNA-directed DNA polymerase activity; INVOLVED IN: DNA repair; LOCATED IN: membrane; EXPRESSED IN: 22 plant structures; EXPRESSED DURING: 13 growth stages; CONTAINS InterPro DOMAIN/s: DNA polymerase, Y-family, little finger domain (InterPro:IPR017961), DNA-repair protein, UmuC-like (InterPro:IPR001126), DNA-repair protein…	DNA polymerase IV | DNA polymerase, Y-family, little finger domain | DNA-repair protein, UmuC-like | DNA-repair protein, UmuC-like, N-terminal
18.2232	13.8484	AT1G50030	7	86	GTAG	GTAG	target of rapamycin	target of rapamycin (TOR); FUNCTIONS IN: protein binding, 1-phosphatidylinositol-3-kinase activity; INVOLVED IN: embryo development ending in seed dormancy; LOCATED IN: chloroplast; EXPRESSED IN: 28 plant structures; EXPRESSED DURING: 15 growth stages; CONTAINS InterPro DOMAIN/s: Phosphatidylinositol 3-/4-kinase, catalytic (InterPro:IPR000403), Armadillo-like helical (InterPro:IPR011989), FKBP12-…	Armadillo-like helical | Armadillo-type fold | Domain of unknown function DUF3385, target of rapamycin protein | PIK-related kinase | PIK-related kinase, FAT | PIK-related kinase, FATC | Phosphatidylinositol 3-/4-kinase, catalytic domain | Phosphatidylinositol 3/4-kinase, conserved site | Protein kinase-like domain | Rapamycin-binding domain
5.53246	3.90828	AT1G50200	6	84	GTAG	GTAG	Alanyl-tRNA synthetase	Alanyl-tRNA synthetase (ALATS); FUNCTIONS IN: alanine-tRNA ligase activity, ligase activity, forming aminoacyl-tRNA and related compounds, nucleotide binding, ATP binding, nucleic acid binding; FUNCTIONS IN: alanine-tRNA ligase activity, ligase activity, forming aminoacyl-tRNA and related compounds, nucleotide binding, nucleic acid binding, ATP binding; INVOLVED IN: alanyl-tRNA aminoacylation; IN…	Alanine-tRNA ligase, class IIc | Alanine-tRNA ligase, class IIc, anti-codon-binding domain | Alanine-tRNA ligase, eukaryota/bacteria | Alanyl-tRNA synthetase, class IIc, N-terminal | Alanyl-tRNA synthetase, class IIc, core domain | DHHA1 domain | Threonyl/alanyl tRNA synthetase, SAD | Threonyl/alanyl tRNA synthetase, class II-like, putative editing domain | Translation protein, beta-barrel domain
5.58099	7.63788	AT1G50670	6	245	GTAG	GTAG	OTU-like cysteine protease family protein	OTU-like cysteine protease family protein; FUNCTIONS IN: cysteine-type peptidase activity; INVOLVED IN: biological_process unknown; EXPRESSED IN: 23 plant structures; EXPRESSED DURING: 16 growth stages; CONTAINS InterPro DOMAIN/s: Ovarian tumour, otubain (InterPro:IPR003323)	Ovarian tumour, otubain
23.7008	8.28698	AT1G50710	6	196	GTAG	GTAG		unknown protein	HAUS augmin-like complex subunit 4
14.86	11.2195	AT1G51160	2	150	GTAG	GTAG	SNARE-like superfamily protein	SNARE-like superfamily protein; FUNCTIONS IN: molecular_function unknown; INVOLVED IN: transport, ER to Golgi vesicle-mediated transport; LOCATED IN: cis-Golgi network; EXPRESSED IN: 22 plant structures; EXPRESSED DURING: 13 growth stages; CONTAINS InterPro DOMAIN/s: Sybindin-like protein (InterPro:IPR007233), Longin-like (InterPro:IPR011012); BEST Arabidopsis thaliana protein match is: SNARE-lik…	Longin-like domain | Sybindin-like protein
31.8032	15.3297	AT1G51390	4	79	GTAG	GTAG	NFU domain protein 5	NFU domain protein 5 (NFU5); FUNCTIONS IN: structural molecule activity, copper ion binding, ATP binding; INVOLVED IN: iron-sulfur cluster assembly; LOCATED IN: mitochondrion; CONTAINS InterPro DOMAIN/s: NIF system FeS cluster assembly, NifU, C-terminal (InterPro:IPR001075), HIRA-interacting protein 5 (InterPro:IPR017065), NIF system FeS cluster assembly, NifU-like scaffold, N-terminal (InterPro:…	HIRA-interacting protein 5 | NIF system FeS cluster assembly, NifU, C-terminal | Scaffold protein Nfu/NifU, N-terminal
19.9476	15.8551	AT1G51540	3	85	GTAG	GTAG	Galactose oxidase/kelch repeat superfamily protein	Galactose oxidase/kelch repeat superfamily protein; CONTAINS InterPro DOMAIN/s: Galactose oxidase/kelch, beta-propeller (InterPro:IPR011043), Kelch repeat type 1 (InterPro:IPR006652), Kelch related (InterPro:IPR013089), Kelch-type beta propeller (InterPro:IPR015915); BEST Arabidopsis thaliana protein match is: Galactose oxidase/kelch repeat superfamily protein (TAIR:AT3G27220.1)	Kelch repeat type 1 | Kelch-type beta propeller
9.76901	9.17036	AT1G51690	13	87	GTAG	GTAG	protein phosphatase 2A 55 kDa regulatory subunit B alpha isoform	protein phosphatase 2A 55 kDa regulatory subunit B alpha isoform (B ALPHA); FUNCTIONS IN: nucleotide binding, protein phosphatase type 2A regulator activity; INVOLVED IN: signal transduction; LOCATED IN: endomembrane system, protein phosphatase type 2A complex; LOCATED IN: protein phosphatase type 2A complex; EXPRESSED IN: 23 plant structures; EXPRESSED IN: 24 plant structures; EXPRESSED DURING: …	Protein phosphatase 2A, regulatory subunit PR55 | Protein phosphatase 2A, regulatory subunit PR55, conserved site | WD40 repeat | WD40 repeat, conserved site | WD40-repeat-containing domain | WD40/YVTN repeat-like-containing domain
13.3891	13.7333	AT1G51730	3	108	GTAG	GTAG	Ubiquitin-conjugating enzyme family protein	Ubiquitin-conjugating enzyme family protein; CONTAINS InterPro DOMAIN/s: Ubiquitin-conjugating enzyme/RWD-like (InterPro:IPR016135), RWD (InterPro:IPR006575)	RWD domain | Ubiquitin-conjugating enzyme/RWD-like
7.03569	9.85645	AT1G51805	10	89	GTAG	GTAG	Leucine-rich repeat protein kinase family protein	Leucine-rich repeat protein kinase family protein; FUNCTIONS IN: protein serine/threonine kinase activity, protein kinase activity, kinase activity, ATP binding; INVOLVED IN: protein amino acid phosphorylation; LOCATED IN: endomembrane system; EXPRESSED IN: 20 plant structures; EXPRESSED DURING: 13 growth stages; CONTAINS InterPro DOMAIN/s: Protein kinase, ATP binding site (InterPro:IPR017441), P…	Concanavalin A-like lectin/glucanase, subgroup | Leucine-rich repeat | Malectin-like carbohydrate-binding domain | Protein kinase domain | Protein kinase, ATP binding site | Protein kinase-like domain | Serine/threonine-protein kinase, active site
3.992	4.43079	AT1G51940	5	79	GTAG	GTAG	protein kinase family protein / peptidoglycan-binding LysM domain-containing protein	protein kinase family protein / peptidoglycan-binding LysM domain-containing protein; FUNCTIONS IN: kinase activity; INVOLVED IN: protein amino acid phosphorylation, cell wall macromolecule catabolic process; LOCATED IN: endomembrane system; EXPRESSED IN: 22 plant structures; EXPRESSED DURING: 13 growth stages; CONTAINS InterPro DOMAIN/s: Protein kinase, ATP binding site (InterPro:IPR017441), Pep…	Concanavalin A-like lectin/glucanase, subgroup | LysM domain | Protein kinase domain | Protein kinase, ATP binding site | Protein kinase-like domain | Serine-threonine/tyrosine-protein kinase catalytic domain | Serine/threonine-protein kinase, active site
2.02717	2.41251	AT1G52190	2	1729	GTAG	GTAG	Major facilitator superfamily protein	Major facilitator superfamily protein; FUNCTIONS IN: transporter activity; INVOLVED IN: oligopeptide transport; LOCATED IN: membrane; EXPRESSED IN: 22 plant structures; EXPRESSED DURING: 13 growth stages; CONTAINS InterPro DOMAIN/s: Oligopeptide transporter (InterPro:IPR000109), Major facilitator superfamily, general substrate transporter (InterPro:IPR016196); BEST Arabidopsis thaliana protein ma…	Major facilitator superfamily domain, general substrate transporter | Proton-dependent oligopeptide transporter family
9.10663	9.75164	AT1G52360	19	86	GTAG	GTAG	Coatomer, beta' subunit	Coatomer, beta' subunit; FUNCTIONS IN: structural molecule activity; INVOLVED IN: intracellular protein transport, vesicle-mediated transport; LOCATED IN: membrane coat, COPI vesicle coat; EXPRESSED IN: 24 plant structures; EXPRESSED DURING: 13 growth stages; CONTAINS InterPro DOMAIN/s: WD40 repeat 2 (InterPro:IPR019782), Coatomer, WD associated region (InterPro:IPR006692), Cytochrome cd1-nitrite…	Coatomer beta' subunit (COPB2) | Coatomer, WD associated region | G-protein beta WD-40 repeat | WD40 repeat | WD40-repeat-containing domain | WD40/YVTN repeat-like-containing domain
8.53657	10.122	AT1G52510	7	99	GTAG	GTAG	alpha/beta-Hydrolases superfamily protein	alpha/beta-Hydrolases superfamily protein; FUNCTIONS IN: hydrolase activity, catalytic activity; LOCATED IN: chloroplast; LOCATED IN: chloroplast, chloroplast envelope; EXPRESSED IN: 21 plant structures; EXPRESSED DURING: 13 growth stages; CONTAINS InterPro DOMAIN/s: Epoxide hydrolase-like (InterPro:IPR000639), Alpha/beta hydrolase fold-1 (InterPro:IPR000073); BEST Arabidopsis thaliana protein ma…	Alpha/Beta hydrolase fold | Alpha/beta hydrolase fold-1 | Epoxide hydrolase-like
5.46076	7.93613	AT1G52730	2	105	GTAG	GTAG	Transducin/WD40 repeat-like superfamily protein	Transducin/WD40 repeat-like superfamily protein; CONTAINS InterPro DOMAIN/s: WD40 repeat 2 (InterPro:IPR019782), WD40 repeat-like-containing domain (InterPro:IPR011046), WD40 repeat, conserved site (InterPro:IPR019775), WD40-repeat-containing domain (InterPro:IPR017986), WD40/YVTN repeat-like-containing domain (InterPro:IPR015943), WD40 repeat (InterPro:IPR001680), WD40 repeat, subgroup (InterPro…	WD40 repeat | WD40 repeat, conserved site | WD40-repeat-containing domain | WD40/YVTN repeat-like-containing domain
7.21217	5.88708	AT1G52730	5	95	GTAG	GTAG	Transducin/WD40 repeat-like superfamily protein	Transducin/WD40 repeat-like superfamily protein; CONTAINS InterPro DOMAIN/s: WD40 repeat 2 (InterPro:IPR019782), WD40 repeat-like-containing domain (InterPro:IPR011046), WD40 repeat, conserved site (InterPro:IPR019775), WD40-repeat-containing domain (InterPro:IPR017986), WD40/YVTN repeat-like-containing domain (InterPro:IPR015943), WD40 repeat (InterPro:IPR001680), WD40 repeat, subgroup (InterPro…	WD40 repeat | WD40 repeat, conserved site | WD40-repeat-containing domain | WD40/YVTN repeat-like-containing domain
2.32132	2.81115	AT1G52740	1	408	GTAG	GTAG	histone H2A protein 9	histone H2A protein 9 (HTA9); FUNCTIONS IN: DNA binding; INVOLVED IN: detection of temperature stimulus, defense response to bacterium, regulation of flower development; LOCATED IN: vacuole; EXPRESSED IN: 23 plant structures; EXPRESSED DURING: 15 growth stages; CONTAINS InterPro DOMAIN/s: Histone H2A (InterPro:IPR002119), Histone-fold (InterPro:IPR009072), Histone core (InterPro:IPR007125); BEST …	Histone H2A | Histone core | Histone-fold
7.76466	9.25671	AT1G52980	3	81	GTAG	GTAG	GTP-binding family protein	GTP-binding family protein; FUNCTIONS IN: GTP binding; INVOLVED IN: biological_process unknown; LOCATED IN: intracellular; EXPRESSED IN: 23 plant structures; EXPRESSED DURING: 13 growth stages; CONTAINS InterPro DOMAIN/s: GTP1/OBG (InterPro:IPR006073), GTP-binding protein, HSR1-related (InterPro:IPR002917), NGP1, N-terminal (InterPro:IPR012971); BEST Arabidopsis thaliana protein match is: GTP-bin…	GTP binding domain | GTP-binding protein, orthogonal bundle domain | Nucleolar GTP-binding protein 2 | Nucleolar GTP-binding protein 2, N-terminal domain | P-loop containing nucleoside triphosphate hydrolase
13.392	16.9491	AT1G53430	17	110	GTAG	GTAG	Leucine-rich repeat transmembrane protein kinase	Leucine-rich repeat transmembrane protein kinase; FUNCTIONS IN: kinase activity; INVOLVED IN: protein amino acid phosphorylation; LOCATED IN: plasma membrane; EXPRESSED IN: 23 plant structures; EXPRESSED DURING: 13 growth stages; CONTAINS InterPro DOMAIN/s: Serine/threonine-protein kinase domain (InterPro:IPR002290), Leucine-rich repeat (InterPro:IPR001611), Serine-threonine/tyrosine-protein kina…	Concanavalin A-like lectin/glucanase, subgroup | Leucine-rich repeat | Malectin | Protein kinase domain | Protein kinase-like domain | Serine-threonine/tyrosine-protein kinase catalytic domain | Serine/threonine-protein kinase, active site
9.98434	7.69595	AT1G53580	3	81	GCAG	GCAG	glyoxalase II 3	glyoxalase II 3 (GLY3); FUNCTIONS IN: hydrolase activity, acting on ester bonds, hydroxyacylglutathione hydrolase activity; INVOLVED IN: response to salt stress, methylglyoxal catabolic process to D-lactate; EXPRESSED IN: 23 plant structures; EXPRESSED DURING: 14 growth stages; CONTAINS InterPro DOMAIN/s: Beta-lactamase-like (InterPro:IPR001279); BEST Arabidopsis thaliana protein match is: Metall…	Beta-lactamase-like
2.49296	2.38769	AT1G54010	1	88	GTAG	GTAG	GDSL-like Lipase/Acylhydrolase superfamily protein	GDSL-like Lipase/Acylhydrolase superfamily protein; FUNCTIONS IN: hydrolase activity, acting on ester bonds, carboxylesterase activity; INVOLVED IN: lipid metabolic process; LOCATED IN: plasma membrane, vacuole, membrane; EXPRESSED IN: cultured cell, leaf; EXPRESSED DURING: seedling growth; CONTAINS InterPro DOMAIN/s: Lipase, GDSL (InterPro:IPR001087); BEST Arabidopsis thaliana protein match is: …	Lipase, GDSL | SGNH hydrolase-type esterase domain
2.69367	3.13668	AT1G54210	3	87	GTAG	GTAG	Ubiquitin-like superfamily protein	AUTOPHAGY 12 A (ATG12A); INVOLVED IN: autophagy, protein ubiquitination involved in ubiquitin-dependent protein catabolic process; LOCATED IN: cytoplasm; EXPRESSED IN: 20 plant structures; EXPRESSED DURING: 12 growth stages; CONTAINS InterPro DOMAIN/s: Autophagy-related protein 12 (InterPro:IPR007242); BEST Arabidopsis thaliana protein match is: Ubiquitin-like superfamily protein (TAIR:AT3G13970.…	Ubiquitin-like protein Atg12 | Ubiquitin-related domain
7.4722	3.68127	AT1G54310	6	93	GTAG	GTAG	S-adenosyl-L-methionine-dependent methyltransferases superfamily protein	S-adenosyl-L-methionine-dependent methyltransferases superfamily protein; FUNCTIONS IN: RNA binding; LOCATED IN: plasma membrane; EXPRESSED IN: 15 plant structures; EXPRESSED DURING: 7 growth stages; CONTAINS InterPro DOMAIN/s: Pseudouridine synthase/archaeosine transglycosylase (InterPro:IPR002478); CONTAINS InterPro DOMAIN/s: S-adenosylmethionine-dependent methyltransferase (InterPro:IPR019614)…	PUA domain | PUA-like domain | S-adenosyl-L-methionine-dependent methyltransferase-like | S-adenosylmethionine-dependent methyltransferase
11.4045	4.99163	AT1G54360	9	89	GTAG	GTAG	TBP-ASSOCIATED FACTOR 6B	TBP-ASSOCIATED FACTOR 6B (TAF6B); FUNCTIONS IN: RNA polymerase II transcription factor activity, DNA binding, transcription initiation factor activity; FUNCTIONS IN: RNA polymerase II transcription factor activity, transcription initiation factor activity; FUNCTIONS IN: RNA polymerase II transcription factor activity, transcription initiation factor activity, DNA binding; INVOLVED IN: regulation …
2.6026	2.10114	AT1G54920	6	68	GTAG	GTAG		unknown protein; FUNCTIONS IN: molecular_function unknown; INVOLVED IN: biological_process unknown; EXPRESSED IN: 23 plant structures; LOCATED IN: membrane; EXPRESSED DURING: 15 growth stages
4.15587	7.91719	AT1G55130	5	95	GTAG	GTAG	Endomembrane protein 70 protein family	transmembrane nine 6 (TMN6); CONTAINS InterPro DOMAIN/s: Nonaspanin (TM9SF) (InterPro:IPR004240); BEST Arabidopsis thaliana protein match is: transmembrane nine 7 (TAIR:AT3G13772.1)	Major facilitator superfamily domain, general substrate transporter | Nonaspanin (TM9SF)
132.048	17.5285	AT1G55325	2	93	GTAG	GTAG	RNA polymerase II transcription mediators	GRAND CENTRAL (GCT); FUNCTIONS IN: RNA polymerase II transcription mediator activity; EXPRESSED IN: 23 plant structures; INVOLVED IN: regulation of development, heterochronic, regulation of radial pattern formation; LOCATED IN: mediator complex; EXPRESSED IN: 22 plant structures; EXPRESSED DURING: 13 growth stages; CONTAINS InterPro DOMAIN/s: Mediator complex, subunit Med13 (InterPro:IPR009401)
2.08431	3.49311	AT1G55680	9	420	GTAG	GTAG	Transducin/WD40 repeat-like superfamily protein	Transducin/WD40 repeat-like superfamily protein; CONTAINS InterPro DOMAIN/s: WD40 repeat-like-containing domain (InterPro:IPR011046), WD40 repeat 2 (InterPro:IPR019782), WD40-repeat-containing domain (InterPro:IPR017986), WD40 repeat (InterPro:IPR001680), WD40/YVTN repeat-like-containing domain (InterPro:IPR015943), WD40 repeat, subgroup (InterPro:IPR019781); BEST Arabidopsis thaliana protein mat…	WD40 repeat | WD40-repeat-containing domain | WD40/YVTN repeat-like-containing domain
12.5042	32.4209	AT1G55680	2	188	GTAG	GTAG	Transducin/WD40 repeat-like superfamily protein	Transducin/WD40 repeat-like superfamily protein; CONTAINS InterPro DOMAIN/s: WD40 repeat-like-containing domain (InterPro:IPR011046), WD40 repeat 2 (InterPro:IPR019782), WD40-repeat-containing domain (InterPro:IPR017986), WD40 repeat (InterPro:IPR001680), WD40/YVTN repeat-like-containing domain (InterPro:IPR015943), WD40 repeat, subgroup (InterPro:IPR019781); BEST Arabidopsis thaliana protein mat…	WD40 repeat | WD40-repeat-containing domain | WD40/YVTN repeat-like-containing domain
13.3165	5.80752	AT1G55680	6	196	GTAG	GTAG	Transducin/WD40 repeat-like superfamily protein	Transducin/WD40 repeat-like superfamily protein; CONTAINS InterPro DOMAIN/s: WD40 repeat-like-containing domain (InterPro:IPR011046), WD40 repeat 2 (InterPro:IPR019782), WD40-repeat-containing domain (InterPro:IPR017986), WD40 repeat (InterPro:IPR001680), WD40/YVTN repeat-like-containing domain (InterPro:IPR015943), WD40 repeat, subgroup (InterPro:IPR019781); BEST Arabidopsis thaliana protein mat…	WD40 repeat | WD40-repeat-containing domain | WD40/YVTN repeat-like-containing domain
10.1787	5.87202	AT1G55690	2	150	GTAG	GTAG	Sec14p-like phosphatidylinositol transfer family protein	Sec14p-like phosphatidylinositol transfer family protein; CONTAINS InterPro DOMAIN/s: Cellular retinaldehyde-binding/triple function, C-terminal (InterPro:IPR001251), Cellular retinaldehyde-binding/triple function, N-terminal (InterPro:IPR008273), Phosphatidylinositol transfer protein-like, N-terminal (InterPro:IPR011074); BEST Arabidopsis thaliana protein match is: Sec14p-like phosphatidylinosit…	CRAL-TRIO domain | CRAL/TRIO, N-terminal domain
6.31883	17.255	AT1G55740	2	73	GTAG	GTAG	seed imbibition 1	seed imbibition 1 (SIP1); CONTAINS InterPro DOMAIN/s: Glycoside hydrolase, catalytic core (InterPro:IPR017853), Raffinose synthase (InterPro:IPR008811); BEST Arabidopsis thaliana protein match is: seed imbibition 2 (TAIR:AT3G57520.1)	Aldolase-type TIM barrel | Glycoside hydrolase, superfamily | Glycosyl hydrolases 36
4.49776	3.67741	AT1G55850	3	122	GTAG	GTAG	cellulose synthase like E1	cellulose synthase like E1 (CSLE1); FUNCTIONS IN: cellulose synthase activity, transferase activity, transferring glycosyl groups; INVOLVED IN: plant-type cell wall biogenesis, cellulose biosynthetic process, polysaccharide biosynthetic process; LOCATED IN: endoplasmic reticulum, plasma membrane; EXPRESSED IN: 24 plant structures; EXPRESSED DURING: 13 growth stages; CONTAINS InterPro DOMAIN/s: Ce…	Cellulose synthase | Nucleotide-diphospho-sugar transferases
88.0116	39.426	AT1G55860	5	93	GTAG	GTAG	ubiquitin-protein ligase 1	ubiquitin-protein ligase 1 (UPL1); CONTAINS InterPro DOMAIN/s: Ubiquitin-associated/translation elongation factor EF1B, N-terminal (InterPro:IPR000449), Ubiquitin-associated/translation elongation factor EF1B, N-terminal, eukaryote (InterPro:IPR015940), E3 ubiquitin ligase, domain of unknown function DUF913 (InterPro:IPR010314), Ubiquitin interacting motif (InterPro:IPR003903), E3 ubiquitin ligas…	Armadillo-like helical | Armadillo-type fold | Domain of unknown function DUF4414 | E3 ubiquitin ligase, domain of unknown function DUF908 | E3 ubiquitin ligase, domain of unknown function DUF913 | HECT | UBA-like | Ubiquitin interacting motif | Ubiquitin-associated domain/translation elongation factor EF-Ts, N-terminal | Ubiquitin-associated/translation elongation factor EF1B, N-terminal, eukary…
19.7592	19.3774	AT1G55900	5	168	GTAG	GTAG	Haloacid dehalogenase-like hydrolase (HAD) superfamily protein	TIM50; CONTAINS InterPro DOMAIN/s: NLI interacting factor (InterPro:IPR004274); FUNCTIONS IN: molecular_function unknown; BEST Arabidopsis thaliana protein match is: Haloacid dehalogenase-like hydrolase (HAD) superfamily protein (TAIR:AT1G29780.1); INVOLVED IN: embryo development ending in seed dormancy; LOCATED IN: mitochondrion, mitochondrial inner membrane; EXPRESSED IN: 24 plant structures; E…	HAD-like domain | Mitochondrial import inner membrane translocase subunit Tim50 | NLI interacting factor
5.51651	5.30998	AT1G56140	15	87	GTAG	GTAG	Leucine-rich repeat transmembrane protein kinase	Leucine-rich repeat transmembrane protein kinase; FUNCTIONS IN: protein serine/threonine kinase activity, protein kinase activity, ATP binding; INVOLVED IN: protein amino acid phosphorylation; LOCATED IN: plasma membrane; EXPRESSED IN: callus; CONTAINS InterPro DOMAIN/s: Serine/threonine-protein kinase domain (InterPro:IPR002290), Leucine-rich repeat (InterPro:IPR001611), Serine-threonine/tyrosin…	Concanavalin A-like lectin/glucanase, subgroup | Leucine-rich repeat | Malectin | Protein kinase domain | Protein kinase-like domain | Serine-threonine/tyrosine-protein kinase catalytic domain | Serine/threonine-protein kinase, active site
12.3281	17.2459	AT1G56330	2	155	GTAG	GTAG	secretion-associated RAS 1B	secretion-associated RAS 1B (SAR1B); FUNCTIONS IN: GTP binding; INVOLVED IN: ER to Golgi vesicle-mediated transport; LOCATED IN: cytosol, peripheral to membrane of membrane fraction, endoplasmic reticulum, plasma membrane; EXPRESSED IN: 25 plant structures; EXPRESSED DURING: 15 growth stages; CONTAINS InterPro DOMAIN/s: Small GTP-binding protein (InterPro:IPR005225), Small GTPase SAR1-type (Inter…	P-loop containing nucleoside triphosphate hydrolase | Small GTP-binding protein domain | Small GTPase superfamily, ARF/SAR type | Small GTPase superfamily, SAR1-type
5.68048	4.55539	AT1G56460	8	101	GTAG	GTAG	HIT zinc finger ;PAPA-1-like conserved region	HIT zinc finger ;PAPA-1-like conserved region; LOCATED IN: chloroplast; CONTAINS InterPro DOMAIN/s: Zinc finger, HIT-type (InterPro:IPR007529), PAPA-1-like conserved region (InterPro:IPR006880); BEST Arabidopsis thaliana protein match is: HIT zinc finger ;PAPA-1-like conserved region (TAIR:AT2G47350.1)	INO80 complex subunit B-like conserved region | INO80 complex, subunit Ies2 | Zinc finger, HIT-type
4.29696	6.72991	AT1G57720	5	111	GTAG	GTAG	Translation elongation factor EF1B, gamma chain	Translation elongation factor EF1B, gamma chain; FUNCTIONS IN: copper ion binding, translation elongation factor activity; INVOLVED IN: response to cadmium ion, response to zinc ion; LOCATED IN: cell wall, plasma membrane, vacuole, membrane; EXPRESSED IN: 6 plant structures; EXPRESSED DURING: seedling growth, seed development stages; CONTAINS InterPro DOMAIN/s: Thioredoxin fold (InterPro:IPR01233…	Glutathione S-transferase, C-terminal | Glutathione S-transferase, C-terminal-like | Glutathione S-transferase, N-terminal | Thioredoxin-like fold | Translation elongation factor EF1B, gamma chain, conserved
13.5571	13.6687	AT1G57870	2	114	GTAG	GTAG	shaggy-like kinase 42	shaggy-like kinase 42 (SK42); FUNCTIONS IN: protein serine/threonine kinase activity, protein kinase activity, ATP binding; INVOLVED IN: response to salt stress, hyperosmotic response; LOCATED IN: cytosol; EXPRESSED IN: 23 plant structures; EXPRESSED IN: 24 plant structures; EXPRESSED DURING: 13 growth stages; CONTAINS InterPro DOMAIN/s: Protein kinase, ATP binding site (InterPro:IPR017441), Prot…	Protein kinase domain | Protein kinase, ATP binding site | Protein kinase-like domain | Serine/threonine-protein kinase, active site | Serine/threonine/dual specificity protein kinase, catalytic domain
49.0262	31.3648	AT1G58060	11	76	GCAG	GCAG	RNA helicase family protein	RNA helicase family protein; FUNCTIONS IN: helicase activity, nucleic acid binding, ATP-dependent helicase activity, ATP binding; INVOLVED IN: biological_process unknown; LOCATED IN: chloroplast; CONTAINS InterPro DOMAIN/s: Helicase-associated domain (InterPro:IPR007502), DNA/RNA helicase, DEAD/DEAH box type, N-terminal (InterPro:IPR011545), Domain of unknown function DUF1605 (InterPro:IPR011709)…	DEAD/DEAH box helicase domain | Domain of unknown function DUF1605 | Helicase, C-terminal | Helicase, superfamily 1/2, ATP-binding domain | Helicase-associated domain | P-loop containing nucleoside triphosphate hydrolase
8.72815	16.8451	AT1G58200	9	100	GTAG	GTAG	MSCS-like 3	MSCS-like 3 (MSL3); FUNCTIONS IN: ion channel activity; INVOLVED IN: plastid organization, response to osmotic stress; LOCATED IN: membrane, plastid envelope; EXPRESSED IN: 26 plant structures; EXPRESSED DURING: 15 growth stages; CONTAINS InterPro DOMAIN/s: Mechanosensitive ion channel MscS (InterPro:IPR006685), Like-Sm ribonucleoprotein (LSM)-related domain (InterPro:IPR010920); BEST Arabidopsis…	Like-Sm (LSM) domain | Mechanosensitive ion channel MscS
4.80798	3.41785	AT1G58350	4	101	GCAG	GCAG	Putative serine esterase family protein	ZW18; INVOLVED IN: biological_process unknown; LOCATED IN: mitochondrion; CONTAINS InterPro DOMAIN/s: Protein of unknown function DUF3657 (InterPro:IPR022122), Protein of unknown function DUF676, hydrolase-like (InterPro:IPR007751); BEST Arabidopsis thaliana protein match is: Putative serine esterase family protein (TAIR:AT1G09980.1)	Alpha/Beta hydrolase fold | Domain of unknown function DUF676, lipase-like | Protein of unknown function DUF3657
14.8912	17.2075	AT1G58440	7	819	GTAG	GTAG	FAD/NAD(P)-binding oxidoreductase family protein	XF1; FUNCTIONS IN: squalene monooxygenase activity; INVOLVED IN: response to water deprivation, sterol biosynthetic process; LOCATED IN: endomembrane system, integral to membrane; EXPRESSED IN: 29 plant structures; EXPRESSED DURING: 13 growth stages; CONTAINS InterPro DOMAIN/s: Squalene epoxidase (InterPro:IPR013698); BEST Arabidopsis thaliana protein match is: squalene epoxidase 2 (TAIR:AT2G2283…	Aromatic-ring hydroxylase-like | Squalene epoxidase
7.04745	8.61671	AT1G59580	1	302	GTAG	GTAG	mitogen-activated protein kinase homolog 2	mitogen-activated protein kinase homolog 2 (MPK2); CONTAINS InterPro DOMAIN/s: Protein kinase, ATP binding site (InterPro:IPR017441), MAP kinase, conserved site (InterPro:IPR003527), Protein kinase, catalytic domain (InterPro:IPR000719), Serine/threonine-protein kinase domain (InterPro:IPR002290), Serine/threonine-protein kinase-like domain (InterPro:IPR017442), Protein kinase-like domain (InterP…	Mitogen-activated protein (MAP) kinase, conserved site | Protein kinase domain | Protein kinase, ATP binding site | Protein kinase-like domain | Serine/threonine-protein kinase, active site | Serine/threonine/dual specificity protein kinase, catalytic domain
13.4264	8.43615	AT1G59760	6	89	GTAG	GTAG	RNA helicase, ATP-dependent, SK12/DOB1 protein	RNA helicase, ATP-dependent, SK12/DOB1 protein; FUNCTIONS IN: hydrolase activity, acting on acid anhydrides, in phosphorus-containing anhydrides, helicase activity, ATP binding, ATP-dependent helicase activity, nucleic acid binding; INVOLVED IN: N-terminal protein myristoylation; EXPRESSED IN: 23 plant structures; EXPRESSED DURING: 14 growth stages; CONTAINS InterPro DOMAIN/s: DNA/RNA helicase, D…	DEAD/DEAH box helicase domain | DSH, C-terminal | Helicase, C-terminal | Helicase, superfamily 1/2, ATP-binding domain | P-loop containing nucleoside triphosphate hydrolase | RNA helicase, ATP-dependent, SK12/DOB1 | rRNA-processing arch domain
11.1356	12.8612	AT1G59840	5	82	GTAG	GTAG	cofactor assembly of complex C	cofactor assembly of complex C (CCB4); FUNCTIONS IN: molecular_function unknown; INVOLVED IN: cytochrome b6f complex assembly; LOCATED IN: chloroplast; EXPRESSED IN: 20 plant structures; EXPRESSED DURING: 13 growth stages; CONTAINS InterPro DOMAIN/s: Protein of unknown function DUF2930 (InterPro:IPR021325)	Protein of unknown function DUF2930
1296.48	35.102	AT1G59890	10	101	GCAG	GCAG	SIN3-like 5	SIN3-like 5 (SNL5); FUNCTIONS IN: molecular_function unknown; INVOLVED IN: regulation of transcription, DNA-dependent; LOCATED IN: nucleus; EXPRESSED IN: 24 plant structures; EXPRESSED DURING: 15 growth stages; CONTAINS InterPro DOMAIN/s: Histone deacetylase interacting (InterPro:IPR013194), Paired amphipathic helix (InterPro:IPR003822); BEST Arabidopsis thaliana protein match is: SIN3-like 6 (TA…	Histone deacetylase interacting | Paired amphipathic helix
3.28999	2.99245	AT1G60080	5	79	GTAG	GTAG	3'-5'-exoribonuclease family protein	3'-5'-exoribonuclease family protein; FUNCTIONS IN: 3'-5'-exoribonuclease activity, RNA binding; INVOLVED IN: RNA processing; LOCATED IN: cellular_component unknown; EXPRESSED IN: 20 plant structures; EXPRESSED DURING: 12 growth stages; CONTAINS InterPro DOMAIN/s: Exoribonuclease, phosphorolytic domain 2 (InterPro:IPR015847), Exoribonuclease, phosphorolytic domain 1 (InterPro:IPR001247), Ribosoma…	Exoribonuclease, phosphorolytic domain 1 | Exoribonuclease, phosphorolytic domain 2 | Ribosomal protein S5 domain 2-type fold
9.3007	5.06641	AT1G60260	12	68	GTAG	GTAG	beta glucosidase 5	beta glucosidase 5 (BGLU5); FUNCTIONS IN: cation binding, hydrolase activity, hydrolyzing O-glycosyl compounds, catalytic activity; INVOLVED IN: carbohydrate metabolic process; LOCATED IN: endomembrane system; CONTAINS InterPro DOMAIN/s: Glycoside hydrolase, family 1 (InterPro:IPR001360), Glycoside hydrolase, family 1, active site (InterPro:IPR018120), Glycoside hydrolase, catalytic core (InterPr…
4.68861	4.3993	AT1G60490	12	122	GTAG	GTAG	vacuolar protein sorting 34	vacuolar protein sorting 34 (VPS34); FUNCTIONS IN: 1-phosphatidylinositol-3-kinase activity, inositol or phosphatidylinositol kinase activity, binding, phosphotransferase activity, alcohol group as acceptor; INVOLVED IN: oxygen and reactive oxygen species metabolic process, response to salt stress, endocytosis, N-terminal protein myristoylation, microgametogenesis; LOCATED IN: phosphoinositide 3-…	Armadillo-type fold | C2 domain | Phosphatidylinositol 3-/4-kinase, catalytic domain | Phosphatidylinositol 3-kinase, C2 domain | Phosphatidylinositol 3-kinase, Vps34 type | Phosphatidylinositol 3/4-kinase, conserved site | Phosphatidylinositol Kinase | Phosphoinositide 3-kinase, accessory (PIK) domain | Protein kinase-like domain
21.4023	40.2983	AT1G60600	6	76	GTAG	GTAG	UbiA prenyltransferase family protein	ABERRANT CHLOROPLAST DEVELOPMENT 4 (ABC4); CONTAINS InterPro DOMAIN/s: UbiA prenyltransferase (InterPro:IPR000537), 1,4-dihydroxy-2-naphthoate phytyltransferase (InterPro:IPR011937)	1,4-dihydroxy-2-naphthoate phytyltransferase | UbiA prenyltransferase family
4.1458	4.20295	AT1G60650	3	1091	GTAG	GTAG	RNA-binding (RRM/RBD/RNP motifs) family protein with retrovirus zinc finger-like domain	RNA-binding (RRM/RBD/RNP motifs) family protein with retrovirus zinc finger-like domain; FUNCTIONS IN: RNA binding, nucleotide binding, zinc ion binding, nucleic acid binding; INVOLVED IN: biological_process unknown; LOCATED IN: cellular_component unknown; EXPRESSED IN: 21 plant structures; EXPRESSED DURING: 10 growth stages; CONTAINS InterPro DOMAIN/s: RNA recognition motif, RNP-1 (InterPro:IPR0…	Nucleotide-binding, alpha-beta plait | RNA recognition motif domain | Zinc finger, CCHC-type
3.96082	5.4448	AT1G60700	2	97	GTAG	GTAG	SMAD/FHA domain-containing protein	SMAD/FHA domain-containing protein ; CONTAINS InterPro DOMAIN/s: SMAD/FHA domain (InterPro:IPR008984), Forkhead-associated (FHA) domain (InterPro:IPR000253); BEST Arabidopsis thaliana protein match is: Forkhead-associated (FHA) domain-containing protein (TAIR:AT3G54350.3)	Forkhead-associated (FHA) domain | SMAD/FHA domain
14.9794	12.2637	AT1G60710	1	94	GCAG	GCAG	NAD(P)-linked oxidoreductase superfamily protein	ATB2; FUNCTIONS IN: oxidoreductase activity; INVOLVED IN: response to cadmium ion; EXPRESSED IN: 23 plant structures; EXPRESSED DURING: 14 growth stages; CONTAINS InterPro DOMAIN/s: Aldo/keto reductase (InterPro:IPR001395), Aldo/keto reductase subgroup (InterPro:IPR020471); BEST Arabidopsis thaliana protein match is: NAD(P)-linked oxidoreductase superfamily protein (TAIR:AT1G60730.1)	Aldo/keto reductase | Aldo/keto reductase subgroup | NADP-dependent oxidoreductase domain
4.40114	5.18491	AT1G60860	2	138	GTAG	GTAG	ARF-GAP domain 2	ARF-GAP domain 2 (AGD2); FUNCTIONS IN: ARF GTPase activator activity, zinc ion binding; INVOLVED IN: regulation of ARF GTPase activity; LOCATED IN: cytoplasm; EXPRESSED IN: 22 plant structures; EXPRESSED DURING: 15 growth stages; CONTAINS InterPro DOMAIN/s: Arf GTPase activating protein (InterPro:IPR001164), Pleckstrin homology-type (InterPro:IPR011993), Ankyrin repeat-containing domain (InterPro…	Ankyrin repeat | Ankyrin repeat-containing domain | Arf GTPase activating protein | Arfaptin homology (AH) domain/BAR domain | BAR domain | Pleckstrin homology domain | Pleckstrin homology-like domain
105.512	41.4275	AT1G60900	9	106	GTAG	GTAG	U2 snRNP auxilliary factor, large subunit, splicing factor	U2 snRNP auxilliary factor, large subunit, splicing factor; FUNCTIONS IN: RNA binding, nucleotide binding, nucleic acid binding; INVOLVED IN: mRNA processing; LOCATED IN: nucleus; CONTAINS InterPro DOMAIN/s: RNA recognition motif, RNP-1 (InterPro:IPR000504), Nucleotide-binding, alpha-beta plait (InterPro:IPR012677), U2 snRNP auxilliary factor, large subunit, splicing factor (InterPro:IPR006529); …	Nucleotide-binding, alpha-beta plait | RNA recognition motif domain | U2 snRNP auxilliary factor, large subunit, splicing factor
13.9041	9.10871	AT1G61100	8	98	GTAG	GTAG	disease resistance protein (TIR class), putative	disease resistance protein (TIR class), putative; INVOLVED IN: defense response; LOCATED IN: cellular_component unknown; EXPRESSED IN: 23 plant structures; EXPRESSED DURING: 13 growth stages; BEST Arabidopsis thaliana protein match is: COP1-interacting protein 7 (TAIR:AT4G27430.2)
6.51789	7.94052	AT1G61250	3	195	GTAG	GTAG	secretory carrier 3	secretory carrier 3 (SC3); FUNCTIONS IN: transmembrane transporter activity; INVOLVED IN: protein transport; CONTAINS InterPro DOMAIN/s: SCAMP (InterPro:IPR007273); LOCATED IN: plasma membrane, membrane; BEST Arabidopsis thaliana protein match is: Secretory carrier membrane protein (SCAMP) family protein (TAIR:AT1G11180.1); EXPRESSED IN: leaf	SCAMP
19.8845	20.6529	AT1G61780	3	274	GTAG	GTAG	postsynaptic protein-related	postsynaptic protein-related; FUNCTIONS IN: molecular_function unknown; INVOLVED IN: biological_process unknown; LOCATED IN: cellular_component unknown; EXPRESSED IN: 25 plant structures; EXPRESSED DURING: 15 growth stages; CONTAINS InterPro DOMAIN/s: Microtubule-associated protein CRIPT (InterPro:IPR019367)	PDZ-binding protein, CRIPT
6.4597	7.16626	AT1G61900	2	97	GTAG	GTAG		unknown protein; BEST Arabidopsis thaliana protein match is: unknown protein (TAIR:AT2G30700.1); FUNCTIONS IN: molecular_function unknown; INVOLVED IN: biological_process unknown; LOCATED IN: anchored to plasma membrane, plasma membrane, anchored to membrane; EXPRESSED IN: 23 plant structures; EXPRESSED DURING: 13 growth stages
8.30543	3.92181	AT1G62250	1	169	GTAG	GTAG		unknown protein; LOCATED IN: chloroplast; EXPRESSED IN: 23 plant structures; EXPRESSED DURING: 15 growth stages
2.92122	3.16778	AT1G62380	2	476	GTAG	GTAG	ACC oxidase 2	ACC oxidase 2 (ACO2); FUNCTIONS IN: 1-aminocyclopropane-1-carboxylate oxidase activity, copper ion binding; INVOLVED IN: response to salt stress, detection of ethylene stimulus, ethylene biosynthetic process; LOCATED IN: cell wall, plasma membrane; EXPRESSED IN: 24 plant structures; EXPRESSED DURING: 14 growth stages; CONTAINS InterPro DOMAIN/s: Oxoglutarate/iron-dependent oxygenase (InterPro:IPR…	Isopenicillin N synthase-like | Non-haem dioxygenase N-terminal domain | Oxoglutarate/iron-dependent dioxygenase
14.7487	9.6228	AT1G62780	7	83	GTAG	GTAG		unknown protein; FUNCTIONS IN: molecular_function unknown; INVOLVED IN: biological_process unknown; LOCATED IN: chloroplast, chloroplast stroma; EXPRESSED IN: 22 plant structures; EXPRESSED DURING: 14 growth stages
9.8219	5.66948	AT1G62800	3	93	GTAG	GTAG	aspartate aminotransferase 4	aspartate aminotransferase 4 (ASP4); FUNCTIONS IN: pyridoxal phosphate binding, transferase activity, transferring nitrogenous groups, transaminase activity, catalytic activity; FUNCTIONS IN: transferase activity, transferring nitrogenous groups, pyridoxal phosphate binding, transaminase activity, catalytic activity; INVOLVED IN: asparagine catabolic process, biosynthetic process, glutamate catab…	Aminotransferase, class I/classII | Aminotransferases, class-I, pyridoxal-phosphate-binding site | Aspartate/other aminotransferase | Pyridoxal phosphate-dependent transferase | Pyridoxal phosphate-dependent transferase, major region, subdomain 1
5.12894	3.67354	AT1G62960	3	88	GTAG	GTAG	ACC synthase 10	ACC synthase 10 (ACS10); CONTAINS InterPro DOMAIN/s: 1-aminocyclopropane-1-carboxylate synthase (InterPro:IPR001176), Aminotransferase, class I/classII (InterPro:IPR004839), Pyridoxal phosphate-dependent transferase, major domain (InterPro:IPR015424), Pyridoxal phosphate-dependent transferase, major region, subdomain 1 (InterPro:IPR015421), Pyridoxal phosphate-dependent transferase, major region,…	Aminotransferase, class I/classII | Pyridoxal phosphate-dependent transferase | Pyridoxal phosphate-dependent transferase, major region, subdomain 1 | Pyridoxal phosphate-dependent transferase, major region, subdomain 2
118.125	3.59761	AT1G62990	3	94	GTAG	GTAG	KNOTTED-like homeobox of Arabidopsis thaliana 7	KNOTTED-like homeobox of Arabidopsis thaliana 7 (KNAT7); CONTAINS InterPro DOMAIN/s: ELK (InterPro:IPR005539), KNOX1 (InterPro:IPR005540), Homeobox (InterPro:IPR001356), Homeodomain-like (InterPro:IPR009057), KNOX2 (InterPro:IPR005541), Homeodomain-related (InterPro:IPR012287); BEST Arabidopsis thaliana protein match is: KNOTTED1-like homeobox gene 3 (TAIR:AT5G25220.1)	ELK | Homeobox KN domain | Homeobox domain | Homeodomain-like | KNOX1 | KNOX2
3.19125	2.7463	AT1G63420	5	74	GTAG	GTAG	Arabidopsis thaliana protein of unknown function (DUF821)	CONTAINS InterPro DOMAIN/s: Lipopolysaccharide-modifying protein (InterPro:IPR006598), Protein of unknown function DUF821, CAP10-like (InterPro:IPR008539); BEST Arabidopsis thaliana protein match is: Arabidopsis thaliana protein of unknown function (DUF821) (TAIR:AT3G48980.1)	Lipopolysaccharide-modifying protein
2.94181	2.05537	AT1G63800	5	122	GTAG	GTAG	ubiquitin-conjugating enzyme 5	ubiquitin-conjugating enzyme 5 (UBC5); CONTAINS InterPro DOMAIN/s: Ubiquitin-conjugating enzyme/RWD-like (InterPro:IPR016135), Ubiquitin-conjugating enzyme, E2 (InterPro:IPR000608), Ubiquitin-conjugating enzyme (InterPro:IPR015581); BEST Arabidopsis thaliana protein match is: ubiquitin conjugating enzyme 4 (TAIR:AT5G41340.1)	Ubiquitin-conjugating enzyme, E2 | Ubiquitin-conjugating enzyme, active site | Ubiquitin-conjugating enzyme/RWD-like
29.8153	9.4044	AT1G63980	8	96	GTAG	GTAG	D111/G-patch domain-containing protein	D111/G-patch domain-containing protein; FUNCTIONS IN: nucleic acid binding; INVOLVED IN: biological_process unknown; LOCATED IN: intracellular; EXPRESSED IN: 23 plant structures; EXPRESSED DURING: 13 growth stages; CONTAINS InterPro DOMAIN/s: D111/G-patch (InterPro:IPR000467)	G-patch domain
6.75849	3.752	AT1G64200	3	85	GTAG	GTAG	vacuolar H+-ATPase subunit E isoform 3	vacuolar H+-ATPase subunit E isoform 3 (VHA-E3); FUNCTIONS IN: proton-transporting ATPase activity, rotational mechanism; INVOLVED IN: ATP synthesis coupled proton transport; LOCATED IN: plasma membrane, vacuole, mitochondrial proton-transporting ATP synthase complex; EXPRESSED IN: 27 plant structures; EXPRESSED DURING: 17 growth stages; CONTAINS InterPro DOMAIN/s: ATPase, V1/A1 complex, subunit …	ATPase, V1/A1 complex, subunit E
2.64645	2.5276	AT1G64230	3	89	GTAG	GTAG	ubiquitin-conjugating enzyme 28	ubiquitin-conjugating enzyme 28 (UBC28); CONTAINS InterPro DOMAIN/s: Ubiquitin-conjugating enzyme/RWD-like (InterPro:IPR016135), Ubiquitin-conjugating enzyme, E2 (InterPro:IPR000608); FUNCTIONS IN: ubiquitin-protein ligase activity; BEST Arabidopsis thaliana protein match is: ubiquitin conjugating enzyme 8 (TAIR:AT5G41700.5); BEST Arabidopsis thaliana protein match is: ubiquitin conjugating enzym…	Ubiquitin-conjugating enzyme, E2 | Ubiquitin-conjugating enzyme, active site | Ubiquitin-conjugating enzyme/RWD-like
2.72771	2.86239	AT1G64430	4	183	GTAG	GTAG	Pentatricopeptide repeat (PPR) superfamily protein	Pentatricopeptide repeat (PPR) superfamily protein; CONTAINS InterPro DOMAIN/s: Pentatricopeptide repeat (InterPro:IPR002885)	Pentatricopeptide repeat
5.70244	7.56033	AT1G65000	1	966	GTAG	GTAG		unknown protein; BEST Arabidopsis thaliana protein match is: unknown protein (TAIR:AT5G38060.1)
-1	-1	AT1G65150	4	181	GTAG	GTAG	TRAF-like family protein	TRAF-like family protein; CONTAINS InterPro DOMAIN/s: TRAF-like (InterPro:IPR008974), MATH (InterPro:IPR002083); BEST Arabidopsis thaliana protein match is: TRAF-like superfamily protein (TAIR:AT1G65050.1)	MATH | TRAF-like
4.69367	11.8958	AT1G65260	7	120	GTAG	GTAG	plastid transcriptionally active 4	plastid transcriptionally active 4 (PTAC4); INVOLVED IN: vesicle organization, thylakoid membrane organization; LOCATED IN: in 8 components; EXPRESSED IN: 23 plant structures; EXPRESSED DURING: 15 growth stages; CONTAINS InterPro DOMAIN/s: PspA/IM30 (InterPro:IPR007157)	PspA/IM30
12.5769	39.6874	AT1G65260	2	96	GTAG	GTAG	plastid transcriptionally active 4	plastid transcriptionally active 4 (PTAC4); INVOLVED IN: vesicle organization, thylakoid membrane organization; LOCATED IN: in 8 components; EXPRESSED IN: 23 plant structures; EXPRESSED DURING: 15 growth stages; CONTAINS InterPro DOMAIN/s: PspA/IM30 (InterPro:IPR007157)	PspA/IM30
19.2589	2.99289	AT1G65260	6	425	GTAG	GTAG	plastid transcriptionally active 4	plastid transcriptionally active 4 (PTAC4); INVOLVED IN: vesicle organization, thylakoid membrane organization; LOCATED IN: in 8 components; EXPRESSED IN: 23 plant structures; EXPRESSED DURING: 15 growth stages; CONTAINS InterPro DOMAIN/s: PspA/IM30 (InterPro:IPR007157)	PspA/IM30
5.81706	10.2897	AT1G65410	9	91	GTAG	GTAG	non-intrinsic ABC protein 11	non-intrinsic ABC protein 11 (NAP11); FUNCTIONS IN: transporter activity, ATPase activity; INVOLVED IN: lipid transport; LOCATED IN: chloroplast; EXPRESSED IN: 23 plant structures; EXPRESSED DURING: 13 growth stages; CONTAINS InterPro DOMAIN/s: ATPase, AAA+ type, core (InterPro:IPR003593), ABC transporter-like (InterPro:IPR003439), ABC transporter, conserved site (InterPro:IPR017871); BEST Arabid…	AAA+ ATPase domain | ABC transporter, conserved site | ABC transporter-like | P-loop containing nucleoside triphosphate hydrolase
71.0655	54.3117	AT1G65440	8	74	GTAG	GTAG	global transcription factor group B1	global transcription factor group B1 (GTB1); FUNCTIONS IN: transcription elongation regulator activity, hydrolase activity, acting on ester bonds, RNA binding; INVOLVED IN: chromatin assembly or disassembly, transcription initiation; LOCATED IN: cellular_component unknown; EXPRESSED IN: 24 plant structures; EXPRESSED IN: 25 plant structures; EXPRESSED DURING: 13 growth stages; CONTAINS InterPro D…	Death-like domain of Spt6 | Nucleic acid-binding, OB-fold | RNA-binding domain, S1 | Ribonuclease H-like domain | Ribosomal protein S1, RNA-binding domain | RuvA domain 2-like | SH2 domain | Spt6 acidic, N-terminal domain | Tex RuvX-like domain | Tex-like domain | Transcription elongation factor SPT6, YqgF domain | Transcription elongation factor Spt6 | YqgF/RNase H-like domain
2.67545	2.87383	AT1G65510	1	149	GTAG	GTAG		unknown protein; FUNCTIONS IN: molecular_function unknown; INVOLVED IN: N-terminal protein myristoylation; LOCATED IN: endomembrane system; EXPRESSED IN: 9 plant structures; EXPRESSED DURING: LP.06 six leaves visible, LP.04 four leaves visible, 4 anthesis, petal differentiation and expansion stage, LP.08 eight leaves visible; BEST Arabidopsis thaliana protein match is: unknown protein (TAIR:AT1G6…
5.43372	7.85816	AT1G65590	13	101	GTAG	GTAG	beta-hexosaminidase 3	beta-hexosaminidase 3 (HEXO3); FUNCTIONS IN: hexosaminidase activity, beta-N-acetylhexosaminidase activity; INVOLVED IN: carbohydrate metabolic process; LOCATED IN: cell wall, plasma membrane, plant-type cell wall; EXPRESSED IN: 12 plant structures; EXPRESSED DURING: L mature pollen stage, M germinated pollen stage, 4 anthesis, petal differentiation and expansion stage, E expanded cotyledon stage…	Beta-hexosaminidase | Beta-hexosaminidase, eukaryotic type, N-terminal | Chitobiase/beta-hexosaminidase domain 2-like | Glycoside hydrolase family 20, catalytic core | Glycoside hydrolase, catalytic domain | Glycoside hydrolase, superfamily
2.58844	2.73746	AT1G65960	3	1303	GTAG	GTAG	glutamate decarboxylase 2	glutamate decarboxylase 2 (GAD2); CONTAINS InterPro DOMAIN/s: Pyridoxal phosphate-dependent transferase, major domain (InterPro:IPR015424), Pyridoxal phosphate-dependent decarboxylase (InterPro:IPR002129), Glutamate decarboxylase (InterPro:IPR010107), Pyridoxal phosphate-dependent transferase, major region, subdomain 1 (InterPro:IPR015421); BEST Arabidopsis thaliana protein match is: glutamate de…	Glutamate decarboxylase | Pyridoxal phosphate-dependent decarboxylase | Pyridoxal phosphate-dependent transferase | Pyridoxal phosphate-dependent transferase, major region, subdomain 1
4.71595	5.48557	AT1G66340	5	90	GTAG	GTAG	Signal transduction histidine kinase, hybrid-type, ethylene sensor	ETHYLENE RESPONSE 1 (ETR1); CONTAINS InterPro DOMAIN/s: Signal transduction histidine kinase, homodimeric (InterPro:IPR009082), Signal transduction histidine kinase, core (InterPro:IPR005467), Signal transduction histidine kinase, hybrid-type, ethylene sensor (InterPro:IPR014525), ATPase-like, ATP-binding domain (InterPro:IPR003594), CheY-like (InterPro:IPR011006), Signal transduction response re…	CheY-like superfamily | GAF domain | GAF domain-like | Histidine kinase-like ATPase, C-terminal domain | Signal transduction histidine kinase EnvZ-like, dimerisation/phosphoacceptor domain | Signal transduction histidine kinase, core | Signal transduction histidine kinase, homodimeric domain | Signal transduction histidine kinase, hybrid-type, ethylene sensor | Signal transduction histidine kinas…
10.4869	10.1131	AT1G66680	4	644	GTAG	GTAG	S-adenosyl-L-methionine-dependent methyltransferases superfamily protein	AR401; LOCATED IN: cytosol, nucleus; EXPRESSED IN: 25 plant structures; EXPRESSED DURING: 15 growth stages; CONTAINS InterPro DOMAIN/s: Methyltransferase type 12 (InterPro:IPR013217); BEST Arabidopsis thaliana protein match is: S-adenosyl-L-methionine-dependent methyltransferases superfamily protein (TAIR:AT3G60910.1)	Methyltransferase domain | N-lysine methyltransferase See1-like | S-adenosyl-L-methionine-dependent methyltransferase-like
4.09978	2.57699	AT1G67530	1	232	GTTT	GTTT	ARM repeat superfamily protein	ARM repeat superfamily protein; FUNCTIONS IN: ubiquitin-protein ligase activity, binding; INVOLVED IN: protein ubiquitination; LOCATED IN: ubiquitin ligase complex; EXPRESSED IN: 24 plant structures; EXPRESSED DURING: 15 growth stages; CONTAINS InterPro DOMAIN/s: U box domain (InterPro:IPR003613), Armadillo-like helical (InterPro:IPR011989), Armadillo (InterPro:IPR000225), Armadillo-type fold (In…	Armadillo | Armadillo-like helical | Armadillo-type fold | U box domain | Zinc finger, RING/FYVE/PHD-type
5.17494	5.49868	AT1G67530	6	73	GTAG	GTAG	ARM repeat superfamily protein	ARM repeat superfamily protein; FUNCTIONS IN: ubiquitin-protein ligase activity, binding; INVOLVED IN: protein ubiquitination; LOCATED IN: ubiquitin ligase complex; EXPRESSED IN: 24 plant structures; EXPRESSED DURING: 15 growth stages; CONTAINS InterPro DOMAIN/s: U box domain (InterPro:IPR003613), Armadillo-like helical (InterPro:IPR011989), Armadillo (InterPro:IPR000225), Armadillo-type fold (In…	Armadillo | Armadillo-like helical | Armadillo-type fold | U box domain | Zinc finger, RING/FYVE/PHD-type
4.93765	4.67487	AT1G67700	4	116	GTAG	GTAG		unknown protein; FUNCTIONS IN: molecular_function unknown; INVOLVED IN: biological_process unknown; EXPRESSED IN: 22 plant structures; LOCATED IN: chloroplast, chloroplast envelope; EXPRESSED DURING: 13 growth stages
26.0733	7.67813	AT1G67890	9	106	GTAG	GTAG	PAS domain-containing protein tyrosine kinase family protein	PAS domain-containing protein tyrosine kinase family protein; FUNCTIONS IN: protein serine/threonine/tyrosine kinase activity, kinase activity; INVOLVED IN: signal transduction, protein amino acid phosphorylation, regulation of transcription, DNA-dependent; EXPRESSED IN: 22 plant structures; EXPRESSED DURING: 13 growth stages; CONTAINS InterPro DOMAIN/s: PAC motif (InterPro:IPR001610), Protein ki…	PAC motif | PAS domain | Protein kinase domain | Protein kinase-like domain | Serine-threonine/tyrosine-protein kinase catalytic domain | Serine/threonine-protein kinase, active site
10.0358	13.0478	AT1G68540	1	86	GTAG	GTAG	NAD(P)-binding Rossmann-fold superfamily protein	NAD(P)-binding Rossmann-fold superfamily protein; FUNCTIONS IN: coenzyme binding, oxidoreductase activity, binding, catalytic activity; INVOLVED IN: cellular metabolic process, metabolic process; LOCATED IN: cellular_component unknown; EXPRESSED IN: 21 plant structures; EXPRESSED DURING: 13 growth stages; CONTAINS InterPro DOMAIN/s: NAD-dependent epimerase/dehydratase (InterPro:IPR001509), NAD(P)…	NAD(P)-binding domain | NAD-dependent epimerase/dehydratase, N-terminal domain
18.078	40.5413	AT1G68990	10	160	GTAG	GTAG	male gametophyte defective 3	male gametophyte defective 3 (MGP3); FUNCTIONS IN: DNA-directed RNA polymerase activity, DNA binding; INVOLVED IN: pollen tube growth, transcription, ovule development, embryo development ending in seed dormancy; EXPRESSED IN: 18 plant structures; EXPRESSED DURING: 8 growth stages; CONTAINS InterPro DOMAIN/s: DNA-directed RNA polymerase, bacteriophage type (InterPro:IPR002092); BEST Arabidopsis t…	DNA-directed RNA polymerase N-terminal domain | DNA-directed RNA polymerase, helix hairpin domain | DNA-directed RNA polymerase, phage-type
4.41353	9.00708	AT1G69020	1	96	GCAG	GCAG	Prolyl oligopeptidase family protein	Prolyl oligopeptidase family protein; FUNCTIONS IN: serine-type peptidase activity, serine-type endopeptidase activity; INVOLVED IN: proteolysis; LOCATED IN: chloroplast; EXPRESSED IN: 23 plant structures; EXPRESSED DURING: 14 growth stages; CONTAINS InterPro DOMAIN/s: Peptidase S9, prolyl oligopeptidase, catalytic domain (InterPro:IPR001375), Peptidase S9A, oligopeptidase, N-terminal beta-propel…	Alpha/Beta hydrolase fold | Peptidase S9, prolyl oligopeptidase, catalytic domain | Peptidase S9A, N-terminal domain | Peptidase S9A, prolyl oligopeptidase
2.01788	2.47476	AT1G69310	3	87	GTAG	GTAG	WRKY DNA-binding protein 57	WRKY DNA-binding protein 57 (WRKY57); CONTAINS InterPro DOMAIN/s: DNA-binding WRKY (InterPro:IPR003657); BEST Arabidopsis thaliana protein match is: WRKY DNA-binding protein 48 (TAIR:AT5G49520.1)	DNA-binding WRKY
9.34051	8.89426	AT1G69420	5	103	GTAG	GTAG	DHHC-type zinc finger family protein	DHHC-type zinc finger family protein; FUNCTIONS IN: zinc ion binding; INVOLVED IN: biological_process unknown; LOCATED IN: endomembrane system; EXPRESSED IN: 22 plant structures; EXPRESSED DURING: 13 growth stages; CONTAINS InterPro DOMAIN/s: Zinc finger, DHHC-type (InterPro:IPR001594); BEST Arabidopsis thaliana protein match is: DHHC-type zinc finger family protein (TAIR:AT4G15080.1)	Zinc finger, DHHC-type, palmitoyltransferase
5.35764	4.31052	AT1G69523	2	83	GCAG	GCAG	S-adenosyl-L-methionine-dependent methyltransferases superfamily protein	S-adenosyl-L-methionine-dependent methyltransferases superfamily protein; FUNCTIONS IN: methyltransferase activity; INVOLVED IN: metabolic process; LOCATED IN: chloroplast; EXPRESSED IN: 20 plant structures; EXPRESSED DURING: 13 growth stages; CONTAINS InterPro DOMAIN/s: Methyltransferase type 11 (InterPro:IPR013216); BEST Arabidopsis thaliana protein match is: S-adenosyl-L-methionine-dependent m…	Methyltransferase type 11 | S-adenosyl-L-methionine-dependent methyltransferase-like
17.5468	22.8059	AT1G69700	3	81	GTAG	GTAG	HVA22 homologue C	HVA22 homologue C (HVA22C); FUNCTIONS IN: molecular_function unknown; INVOLVED IN: response to water deprivation, hyperosmotic salinity response, response to abscisic acid stimulus; LOCATED IN: endomembrane system; EXPRESSED IN: 22 plant structures; EXPRESSED DURING: 15 growth stages; CONTAINS InterPro DOMAIN/s: TB2/DP1/HVA22 related protein (InterPro:IPR004345); BEST Arabidopsis thaliana protein…	TB2/DP1/HVA22-related protein
7.54736	5.01494	AT1G70940	1	75	GTAG	GTAG	Auxin efflux carrier family protein	PIN-FORMED 3 (PIN3); FUNCTIONS IN: auxin:hydrogen symporter activity, transporter activity; INVOLVED IN: in 8 processes; LOCATED IN: lateral plasma membrane, plasma membrane, vesicle membrane, cell surface; EXPRESSED IN: 26 plant structures; EXPRESSED DURING: 13 growth stages; CONTAINS InterPro DOMAIN/s: Auxin efflux carrier, subgroup (InterPro:IPR014024), Auxin efflux carrier (InterPro:IPR004776…	Auxin efflux carrier | Auxin efflux carrier, plant type
59.9864	57.6441	AT1G71220	21	128	GTAG	GTAG	UDP-glucose:glycoprotein glucosyltransferases;transferases, transferring hexosyl groups;transferases, transferring glycosyl groups	EMS-mutagenized bri1 suppressor 1 (EBS1); CONTAINS InterPro DOMAIN/s: Glycosyl transferase, family 8 (InterPro:IPR002495), UDP-glucose:Glycoprotein Glucosyltransferase (InterPro:IPR009448); FUNCTIONS IN: transferase activity, transferring hexosyl groups, transferase activity, transferring glycosyl groups, UDP-glucose:glycoprotein glucosyltransferase activity; INVOLVED IN: in 6 processes; LOCATED …
5.05064	4.05075	AT1G71860	8	85	GTAG	GTAG	protein tyrosine phosphatase 1	protein tyrosine phosphatase 1 (PTP1); FUNCTIONS IN: protein tyrosine phosphatase activity; INVOLVED IN: intracellular protein kinase cascade; LOCATED IN: nucleus, plasma membrane, cytoplasm; EXPRESSED IN: 25 plant structures; EXPRESSED DURING: 15 growth stages; CONTAINS InterPro DOMAIN/s: Protein-tyrosine phosphatase, active site (InterPro:IPR016130), Dual-specific/protein-tyrosine phosphatase, …	Protein-tyrosine phosphatase, active site | Protein-tyrosine phosphatase, receptor/non-receptor type | Protein-tyrosine phosphatase-like | Protein-tyrosine/Dual specificity phosphatase
38.7261	99.8395	AT1G72090	2	179	GCAG	GCAG	Methylthiotransferase	Methylthiotransferase; FUNCTIONS IN: 4 iron, 4 sulfur cluster binding, iron-sulfur cluster binding, catalytic activity; INVOLVED IN: metabolic process, RNA modification; LOCATED IN: endoplasmic reticulum, membrane; EXPRESSED IN: 24 plant structures; EXPRESSED DURING: 13 growth stages; CONTAINS InterPro DOMAIN/s: Methylthiotransferase (InterPro:IPR005839), Aldolase-type TIM barrel (InterPro:IPR013…	Elongator protein 3/MiaB/NifB | Methylthiotransferase | Methylthiotransferase, N-terminal | Methylthiotransferase, conserved site | Methylthiotransferase/radical SAM-type protein | MiaB-like tRNA modifying enzyme, archaeal-type | Radical SAM | Radical SAM, alpha/beta horseshoe | TRAM domain
3.67986	2.61164	AT1G72416	2	101	GTAG	GTAG	Chaperone DnaJ-domain superfamily protein	Chaperone DnaJ-domain superfamily protein; FUNCTIONS IN: heat shock protein binding; INVOLVED IN: biological_process unknown; LOCATED IN: cellular_component unknown; BEST Arabidopsis thaliana protein match is: Chaperone DnaJ-domain superfamily protein (TAIR:AT3G14200.1); CONTAINS InterPro DOMAIN/s: Molecular chaperone, heat shock protein, Hsp40, DnaJ (InterPro:IPR015609), Heat shock protein DnaJ,…	DnaJ domain | DnaJ domain, conserved site
4.74404	3.62467	AT1G72440	4	195	GTAG	GTAG	CCAAT-binding factor	embryo sac development arrest 25 (EDA25); INVOLVED IN: polar nucleus fusion, embryo sac development; LOCATED IN: nucleolus; EXPRESSED IN: 25 plant structures; EXPRESSED DURING: 13 growth stages; CONTAINS InterPro DOMAIN/s: CCAAT-binding factor (InterPro:IPR005612)	Armadillo-type fold | CCAAT-binding factor
5.98203	6.09719	AT1G72640	8	104	GTAG	GTAG	NAD(P)-binding Rossmann-fold superfamily protein	NAD(P)-binding Rossmann-fold superfamily protein; FUNCTIONS IN: binding, catalytic activity; INVOLVED IN: metabolic process; LOCATED IN: chloroplast thylakoid membrane, chloroplast; CONTAINS InterPro DOMAIN/s: NAD(P)-binding domain (InterPro:IPR016040)	NAD(P)-binding domain
4.64885	3.93588	AT1G72990	12	107	GTAG	GTAG	beta-galactosidase 17	beta-galactosidase 17 (BGAL17); FUNCTIONS IN: cation binding, beta-galactosidase activity, hydrolase activity, hydrolyzing O-glycosyl compounds, catalytic activity; INVOLVED IN: carbohydrate metabolic process; INVOLVED IN: lactose catabolic process, using glucoside 3-dehydrogenase, carbohydrate metabolic process, lactose catabolic process via UDP-galactose, lactose catabolic process; LOCATED IN: …	Beta-galactosidase 1-like | Galactose-binding domain-like | Glycoside hydrolase, catalytic domain | Glycoside hydrolase, family 35 | Glycoside hydrolase, family 35, conserved site | Glycoside hydrolase, superfamily
4.46429	4.0762	AT1G73110	3	72	GTAG	GTAG	P-loop containing nucleoside triphosphate hydrolases superfamily protein	P-loop containing nucleoside triphosphate hydrolases superfamily protein; FUNCTIONS IN: ATPase activity, ATP binding; LOCATED IN: chloroplast thylakoid membrane, chloroplast; EXPRESSED IN: 21 plant structures; EXPRESSED DURING: 13 growth stages; CONTAINS InterPro DOMAIN/s: ATPase, AAA-type, core (InterPro:IPR003959); BEST Arabidopsis thaliana protein match is: rubisco activase (TAIR:AT2G39730.1)	ATPase, AAA-type, core | P-loop containing nucleoside triphosphate hydrolase
2.64372	5.40216	AT1G73310	12	91	GTAG	GTAG	serine carboxypeptidase-like 4	serine carboxypeptidase-like 4 (scpl4); FUNCTIONS IN: serine-type carboxypeptidase activity; INVOLVED IN: proteolysis; LOCATED IN: endomembrane system; EXPRESSED IN: 16 plant structures; EXPRESSED DURING: 8 growth stages; CONTAINS InterPro DOMAIN/s: Peptidase S10, serine carboxypeptidase (InterPro:IPR001563); BEST Arabidopsis thaliana protein match is: serine carboxypeptidase-like 3 (TAIR:AT1G732…	Alpha/Beta hydrolase fold | Peptidase S10, serine carboxypeptidase
10.486	5.10113	AT1G73310	3	85	GTAG	GTAG	serine carboxypeptidase-like 4	serine carboxypeptidase-like 4 (scpl4); FUNCTIONS IN: serine-type carboxypeptidase activity; INVOLVED IN: proteolysis; LOCATED IN: endomembrane system; EXPRESSED IN: 16 plant structures; EXPRESSED DURING: 8 growth stages; CONTAINS InterPro DOMAIN/s: Peptidase S10, serine carboxypeptidase (InterPro:IPR001563); BEST Arabidopsis thaliana protein match is: serine carboxypeptidase-like 3 (TAIR:AT1G732…	Alpha/Beta hydrolase fold | Peptidase S10, serine carboxypeptidase
3.20748	2.66092	AT1G73920	4	94	GTAG	GTAG	alpha/beta-Hydrolases superfamily protein	alpha/beta-Hydrolases superfamily protein; FUNCTIONS IN: lipase activity; INVOLVED IN: glycerol biosynthetic process, lipid metabolic process; INVOLVED IN: lipid metabolic process; LOCATED IN: cellular_component unknown; EXPRESSED IN: 24 plant structures; EXPRESSED DURING: 15 growth stages; CONTAINS InterPro DOMAIN/s: AB-hydrolase-associated lipase region (InterPro:IPR006693); BEST Arabidopsis th…	Alpha/Beta hydrolase fold | Partial AB-hydrolase lipase domain
5.59497	4.91196	AT1G74040	5	278	GTAG	GTAG	2-isopropylmalate synthase 1	2-isopropylmalate synthase 1 (IMS1); FUNCTIONS IN: 2-isopropylmalate synthase activity; INVOLVED IN: leucine biosynthetic process; LOCATED IN: chloroplast, chloroplast envelope; EXPRESSED IN: 23 plant structures; EXPRESSED DURING: 13 growth stages; CONTAINS InterPro DOMAIN/s: Aldolase-type TIM barrel (InterPro:IPR013785), Alpha-isopropylmalate/homocitrate synthase, conserved site (InterPro:IPR002…	2-isopropylmalate synthase LeuA, allosteric (dimerisation) domain | 2-isopropylmalate synthase, bacterial-type | Aldolase-type TIM barrel | Alpha-isopropylmalate/homocitrate synthase, conserved site | Pyruvate carboxyltransferase
6.66377	5.20771	AT1G74160	4	232	GTAG	GTAG		unknown protein; BEST Arabidopsis thaliana protein match is: unknown protein (TAIR:AT1G18620.1)	Domain of unknown function DUF4378
11.6155	11.0916	AT1G74170	1	61	GTAG	GTAG	receptor like protein 13	receptor like protein 13 (RLP13); CONTAINS InterPro DOMAIN/s: Leucine-rich repeat, typical subtype (InterPro:IPR003591), Leucine-rich repeat (InterPro:IPR001611); BEST Arabidopsis thaliana protein match is: receptor like protein 15 (TAIR:AT1G74190.1)	Leucine-rich repeat
22.192	15.1894	AT1G74530	2	81	GTAG	GTAG		unknown protein
4.71927	5.53734	AT1G74730	1	240	GTAG	GTAG	Protein of unknown function (DUF1118)	Protein of unknown function (DUF1118); FUNCTIONS IN: molecular_function unknown; INVOLVED IN: biological_process unknown; LOCATED IN: chloroplast thylakoid membrane, chloroplast; EXPRESSED IN: 21 plant structures; EXPRESSED DURING: 13 growth stages; CONTAINS InterPro DOMAIN/s: Protein of unknown function DUF1118 (InterPro:IPR009500); BEST Arabidopsis thaliana protein match is: Protein of unknown …	Protein of unknown function DUF1118
19.9838	13.6208	AT1G74910	7	98	GTAG	GTAG	ADP-glucose pyrophosphorylase family protein	ADP-glucose pyrophosphorylase family protein; FUNCTIONS IN: transferase activity, nucleotidyltransferase activity; INVOLVED IN: response to cadmium ion, biosynthetic process; LOCATED IN: peroxisome; EXPRESSED IN: 24 plant structures; EXPRESSED DURING: 13 growth stages; CONTAINS InterPro DOMAIN/s: Trimeric LpxA-like (InterPro:IPR011004), Nucleotidyl transferase (InterPro:IPR005835); BEST Arabidops…	Bacterial transferase hexapeptide repeat | Nucleotide-diphospho-sugar transferases | Nucleotidyl transferase
4.62186	6.95802	AT1G74920	7	176	GTAG	GTAG	aldehyde dehydrogenase 10A8	aldehyde dehydrogenase 10A8 (ALDH10A8); FUNCTIONS IN: 3-chloroallyl aldehyde dehydrogenase activity, oxidoreductase activity; INVOLVED IN: oxidation reduction, glycine betaine biosynthetic process from choline, metabolic process; INVOLVED IN: oxidation reduction, metabolic process; EXPRESSED IN: 23 plant structures; LOCATED IN: cell wall; EXPRESSED DURING: 13 growth stages; CONTAINS InterPro DOMA…	Aldehyde dehydrogenase domain | Aldehyde dehydrogenase, C-terminal | Aldehyde dehydrogenase, N-terminal | Aldehyde dehydrogenase, cysteine active site | Aldehyde dehydrogenase, glutamic acid active site | Aldehyde/histidinol dehydrogenase
6.14943	5.49855	AT1G74920	6	224	GTAG	GTAG	aldehyde dehydrogenase 10A8	aldehyde dehydrogenase 10A8 (ALDH10A8); FUNCTIONS IN: 3-chloroallyl aldehyde dehydrogenase activity, oxidoreductase activity; INVOLVED IN: oxidation reduction, glycine betaine biosynthetic process from choline, metabolic process; INVOLVED IN: oxidation reduction, metabolic process; EXPRESSED IN: 23 plant structures; LOCATED IN: cell wall; EXPRESSED DURING: 13 growth stages; CONTAINS InterPro DOMA…	Aldehyde dehydrogenase domain | Aldehyde dehydrogenase, C-terminal | Aldehyde dehydrogenase, N-terminal | Aldehyde dehydrogenase, cysteine active site | Aldehyde dehydrogenase, glutamic acid active site | Aldehyde/histidinol dehydrogenase
4.02623	7.78879	AT1G74960	12	108	GTAG	GTAG	fatty acid biosynthesis 1	fatty acid biosynthesis 1 (FAB1); CONTAINS InterPro DOMAIN/s: Beta-ketoacyl synthase (InterPro:IPR000794), Thiolase-like (InterPro:IPR016039), Beta-ketoacyl synthase, C-terminal (InterPro:IPR014031), 3-oxoacyl-[acyl-carrier-protein] synthase 2 (InterPro:IPR017568), Beta-ketoacyl synthase, N-terminal (InterPro:IPR014030), Thiolase-like, subgroup (InterPro:IPR016038), Beta-ketoacyl synthase, active…	3-oxoacyl-[acyl-carrier-protein] synthase 2 | Beta-ketoacyl synthase, C-terminal | Beta-ketoacyl synthase, N-terminal | Beta-ketoacyl synthase, active site | Thiolase-like | Thiolase-like, subgroup
2.78454	3.28207	AT1G75210	1	728	GTAG	GTAG	HAD-superfamily hydrolase, subfamily IG, 5'-nucleotidase	HAD-superfamily hydrolase, subfamily IG, 5'-nucleotidase; FUNCTIONS IN: 5'-nucleotidase activity; INVOLVED IN: biological_process unknown; LOCATED IN: chloroplast; EXPRESSED IN: 23 plant structures; EXPRESSED DURING: 13 growth stages; CONTAINS InterPro DOMAIN/s: HAD-superfamily hydrolase, subfamily IG, 5&apos;-nucleotidase (InterPro:IPR008380), Purine 5&apos;-nucleotidase (InterPro:IPR016695); BE…	HAD-like domain | HAD-superfamily hydrolase, subfamily IG, 5'-nucleotidase | Purine 5'-nucleotidase
3.09052	6.5111	AT1G75680	5	128	GTAG	GTAG	glycosyl hydrolase 9B7	glycosyl hydrolase 9B7 (GH9B7); FUNCTIONS IN: hydrolase activity, hydrolyzing O-glycosyl compounds, catalytic activity; INVOLVED IN: carbohydrate metabolic process; LOCATED IN: plasma membrane; EXPRESSED IN: 23 plant structures; EXPRESSED DURING: 13 growth stages; CONTAINS InterPro DOMAIN/s: Six-hairpin glycosidase (InterPro:IPR012341), Glycoside hydrolase, family 9, active site (InterPro:IPR0182…	Glycoside hydrolase, family 9 | Glycoside hydrolase, family 9, active site | Six-hairpin glycosidase | Six-hairpin glycosidase-like
18.2314	37.6476	AT1G76310	2	82	GTAG	GTAG	CYCLIN B2;4	CYCLIN B2;4 (CYCB2;4); FUNCTIONS IN: cyclin-dependent protein kinase regulator activity; INVOLVED IN: regulation of cell cycle; LOCATED IN: nucleus; EXPRESSED IN: 18 plant structures; EXPRESSED DURING: 11 growth stages; CONTAINS InterPro DOMAIN/s: Cyclin, C-terminal (InterPro:IPR004367), Cyclin-like (InterPro:IPR011028), Cyclin-related (InterPro:IPR013763), Cyclin, N-terminal (InterPro:IPR006671)…	Cyclin A/B/D/E/F | Cyclin, C-terminal domain | Cyclin, N-terminal | Cyclin-like
2.87084	3.13607	AT1G76580	3	95	GTAG	GTAG	Squamosa promoter-binding protein-like (SBP domain) transcription factor family protein	Squamosa promoter-binding protein-like (SBP domain) transcription factor family protein; FUNCTIONS IN: sequence-specific DNA binding transcription factor activity; INVOLVED IN: regulation of transcription; LOCATED IN: plasma membrane; EXPRESSED IN: 22 plant structures; EXPRESSED DURING: 13 growth stages; CONTAINS InterPro DOMAIN/s: Transcription factor, SBP-box (InterPro:IPR004333); BEST Arabidop…	Ankyrin repeat | Ankyrin repeat-containing domain | Transcription factor, SBP-box
36.6795	20.5495	AT1G76580	1	113	GTAG	GTAG	Squamosa promoter-binding protein-like (SBP domain) transcription factor family protein	Squamosa promoter-binding protein-like (SBP domain) transcription factor family protein; FUNCTIONS IN: sequence-specific DNA binding transcription factor activity; INVOLVED IN: regulation of transcription; LOCATED IN: plasma membrane; EXPRESSED IN: 22 plant structures; EXPRESSED DURING: 13 growth stages; CONTAINS InterPro DOMAIN/s: Transcription factor, SBP-box (InterPro:IPR004333); BEST Arabidop…	Ankyrin repeat | Ankyrin repeat-containing domain | Transcription factor, SBP-box
10.2413	85.0345	AT1G76810	6	97	GCAG	GCAG	eukaryotic translation initiation factor 2 (eIF-2) family protein	eukaryotic translation initiation factor 2 (eIF-2) family protein; FUNCTIONS IN: translation factor activity, nucleic acid binding, GTP binding, GTPase activity; LOCATED IN: plasma membrane; EXPRESSED IN: 25 plant structures; EXPRESSED DURING: 15 growth stages; CONTAINS InterPro DOMAIN/s: Small GTP-binding protein (InterPro:IPR005225), Translation elongation factor EFTu/EF1A, domain 2 (InterPro:I…	Elongation factor Tu-type domain | Elongation factor, GTP-binding domain | P-loop containing nucleoside triphosphate hydrolase | Small GTP-binding protein domain | Translation elongation factor EFTu/EF1A, domain 2 | Translation initiation factor IF- 2, domain 3 | Translation protein, beta-barrel domain
3.01675	2.94207	AT1G76860	2	336	GTAG	GTAG	Small nuclear ribonucleoprotein family protein	Small nuclear ribonucleoprotein family protein; CONTAINS InterPro DOMAIN/s: Like-Sm ribonucleoprotein (LSM) domain (InterPro:IPR001163), Like-Sm ribonucleoprotein (LSM) domain, eukaryotic/archaea-type (InterPro:IPR006649), Like-Sm ribonucleoprotein (LSM)-related domain (InterPro:IPR010920); BEST Arabidopsis thaliana protein match is: Small nuclear ribonucleoprotein family protein (TAIR:AT1G21190.…	Like-Sm (LSM) domain | Ribonucleoprotein LSM domain | Ribonucleoprotein LSM domain, eukaryotic/archaea-type
5.34188	6.37832	AT1G77020	7	90	GCAG	GCAG	DNAJ heat shock N-terminal domain-containing protein	DNAJ heat shock N-terminal domain-containing protein; FUNCTIONS IN: unfolded protein binding, heat shock protein binding; INVOLVED IN: protein folding; LOCATED IN: cellular_component unknown; EXPRESSED IN: 22 plant structures; EXPRESSED DURING: 12 growth stages; CONTAINS InterPro DOMAIN/s: Molecular chaperone, heat shock protein, Hsp40, DnaJ (InterPro:IPR015609), Heat shock protein DnaJ, N-termin…	DNAJ-containing protein, X-domain | DnaJ domain | DnaJ domain, conserved site
6.52455	7.34318	AT1G77330	3	82	GTAG	GTAG	2-oxoglutarate (2OG) and Fe(II)-dependent oxygenase superfamily protein	2-oxoglutarate (2OG) and Fe(II)-dependent oxygenase superfamily protein; CONTAINS InterPro DOMAIN/s: Oxoglutarate/iron-dependent oxygenase (InterPro:IPR005123); BEST Arabidopsis thaliana protein match is: ACC oxidase 2 (TAIR:AT1G62380.1)	Isopenicillin N synthase-like | Non-haem dioxygenase N-terminal domain | Oxoglutarate/iron-dependent dioxygenase
4.56063	8.83555	AT1G77420	4	80	GTAG	GTAG	alpha/beta-Hydrolases superfamily protein	alpha/beta-Hydrolases superfamily protein; BEST Arabidopsis thaliana protein match is: alpha/beta-Hydrolases superfamily protein (TAIR:AT5G16120.1)	Alpha/Beta hydrolase fold | Alpha/beta hydrolase fold-1
13.0033	24.1444	AT1G77810	10	147	GTAG	GTAG	Galactosyltransferase family protein	Galactosyltransferase family protein; FUNCTIONS IN: transferase activity, transferring glycosyl groups, beta-1,3-galactosyltransferase activity; INVOLVED IN: protein amino acid glycosylation; LOCATED IN: Golgi apparatus; EXPRESSED IN: 20 plant structures; EXPRESSED DURING: 13 growth stages; CONTAINS InterPro DOMAIN/s: Glycosyl transferase, family 31 (InterPro:IPR002659); BEST Arabidopsis thaliana…	Domain of unknown function DUF4094 | Glycosyl transferase, family 31
3.27766	3.90011	AT1G77920	7	79	GTAG	GTAG	bZIP transcription factor family protein	bZIP transcription factor family protein; CONTAINS InterPro DOMAIN/s: Basic-leucine zipper (bZIP) transcription factor (InterPro:IPR004827), bZIP transcription factor, bZIP-1 (InterPro:IPR011616); BEST Arabidopsis thaliana protein match is: TGA1A-related gene 3 (TAIR:AT1G22070.1)	Basic-leucine zipper domain | Transcription factor TGA like domain
4.62698	4.173	AT1G78490	6	79	GCAG	GCAG	cytochrome P450, family 708, subfamily A, polypeptide 3	cytochrome P450, family 708, subfamily A, polypeptide 3 (CYP708A3); FUNCTIONS IN: electron carrier activity, monooxygenase activity, iron ion binding, oxygen binding, heme binding; INVOLVED IN: oxidation reduction; LOCATED IN: endomembrane system; EXPRESSED IN: 22 plant structures; EXPRESSED DURING: 13 growth stages; CONTAINS InterPro DOMAIN/s: Cytochrome P450 (InterPro:IPR001128), Cytochrome P45…	Cytochrome P450 | Cytochrome P450, E-class, group I | Cytochrome P450, conserved site
3.38741	3.13592	AT1G78540	6	99	GTAG	GTAG	SH2 domain protein B	SH2 domain protein B (SHB); FUNCTIONS IN: sequence-specific DNA binding transcription factor activity, signal transducer activity; INVOLVED IN: signal transduction, regulation of transcription, DNA-dependent; LOCATED IN: nucleus; EXPRESSED IN: stem, flower, root, leaf; CONTAINS InterPro DOMAIN/s: SH2 motif (InterPro:IPR000980), STAT transcription factor, core (InterPro:IPR001217), Concanavalin A-…	Concanavalin A-like lectin/glucanase, subgroup | Concanavalin A-like lectin/glucanases superfamily | SH2 domain | Transcription factor STAT
3.39208	4.13613	AT1G78690	5	189	GTAG	GTAG	Phospholipid/glycerol acyltransferase family protein	Phospholipid/glycerol acyltransferase family protein; FUNCTIONS IN: acyltransferase activity; INVOLVED IN: metabolic process; EXPRESSED IN: 21 plant structures; EXPRESSED DURING: 12 growth stages; CONTAINS InterPro DOMAIN/s: Phospholipid/glycerol acyltransferase (InterPro:IPR002123), Tafazzin (InterPro:IPR000872); BEST Arabidopsis thaliana protein match is: Phospholipid/glycerol acyltransferase f…	Phospholipid/glycerol acyltransferase | Tafazzin
4.1792	7.66812	AT1G78920	9	180	GTAG	GTAG	vacuolar H+-pyrophosphatase 2	vacuolar H+-pyrophosphatase 2 (VP2); FUNCTIONS IN: hydrogen-translocating pyrophosphatase activity; INVOLVED IN: proton transport; LOCATED IN: Golgi apparatus; LOCATED IN: Golgi apparatus, vacuole; EXPRESSED IN: 23 plant structures; EXPRESSED DURING: 13 growth stages; CONTAINS InterPro DOMAIN/s: Inorganic H+ pyrophosphatase (InterPro:IPR004131); BEST Arabidopsis thaliana protein match is: Inorgan…	Pyrophosphate-energised proton pump
2.69318	3.4521	AT1G78960	9	76	GTAG	GTAG	lupeol synthase 2	lupeol synthase 2 (LUP2); CONTAINS InterPro DOMAIN/s: Terpene synthase, conserved site (InterPro:IPR002365), Terpenoid cylases/protein prenyltransferase alpha-alpha toroid (InterPro:IPR008930), Squalene cyclase (InterPro:IPR018333), Prenyltransferase/squalene oxidase (InterPro:IPR001330); BEST Arabidopsis thaliana protein match is: Terpenoid cyclases family protein (TAIR:AT1G66960.1)	Squalene cyclase | Terpene synthase, conserved site | Terpenoid cyclases/protein prenyltransferase alpha-alpha toroid
5.49533	4.79205	AT1G78970	12	94	GTAG	GTAG	lupeol synthase 1	lupeol synthase 1 (LUP1); CONTAINS InterPro DOMAIN/s: Terpene synthase, conserved site (InterPro:IPR002365), Terpenoid cylases/protein prenyltransferase alpha-alpha toroid (InterPro:IPR008930), Squalene cyclase (InterPro:IPR018333), Prenyltransferase/squalene oxidase (InterPro:IPR001330); BEST Arabidopsis thaliana protein match is: lupeol synthase 2 (TAIR:AT1G78960.1)	Squalene cyclase | Terpene synthase, conserved site | Terpenoid cyclases/protein prenyltransferase alpha-alpha toroid
7.18889	6.47871	AT1G79230	2	98	GTAG	GTAG	mercaptopyruvate sulfurtransferase 1	mercaptopyruvate sulfurtransferase 1 (MST1); FUNCTIONS IN: 3-mercaptopyruvate sulfurtransferase activity, sulfurtransferase activity, thiosulfate sulfurtransferase activity; INVOLVED IN: sulfate transport, aging; LOCATED IN: mitochondrion, chloroplast; EXPRESSED IN: 25 plant structures; EXPRESSED DURING: 13 growth stages; CONTAINS InterPro DOMAIN/s: Rhodanese-like (InterPro:IPR001763), Thiosulpha…	Rhodanese-like domain | Thiosulphate sulfurtransferase, conserved site
8.08142	6.68254	AT1G79230	1	96	GTAG	GTAG	mercaptopyruvate sulfurtransferase 1	mercaptopyruvate sulfurtransferase 1 (MST1); FUNCTIONS IN: 3-mercaptopyruvate sulfurtransferase activity, sulfurtransferase activity, thiosulfate sulfurtransferase activity; INVOLVED IN: sulfate transport, aging; LOCATED IN: mitochondrion, chloroplast; EXPRESSED IN: 25 plant structures; EXPRESSED DURING: 13 growth stages; CONTAINS InterPro DOMAIN/s: Rhodanese-like (InterPro:IPR001763), Thiosulpha…	Rhodanese-like domain | Thiosulphate sulfurtransferase, conserved site
23.3724	5.96347	AT1G79280	5	79	GTAG	GTAG	nuclear pore anchor	nuclear pore anchor (NUA); CONTAINS InterPro DOMAIN/s: Tetratricopeptide, MLP1/MLP2-like (InterPro:IPR012929); FUNCTIONS IN: molecular_function unknown; INVOLVED IN: poly(A)+ mRNA export from nucleus, stamen development, negative regulation of protein sumoylation, negative regulation of flower development; LOCATED IN: cytosol, nuclear envelope, nucleolus, chloroplast; EXPRESSED IN: 26 plant struc…	Tetratricopeptide, MLP1/MLP2-like
26.4174	5.31598	AT1G79280	23	383	GTAG	GTAG	nuclear pore anchor	nuclear pore anchor (NUA); CONTAINS InterPro DOMAIN/s: Tetratricopeptide, MLP1/MLP2-like (InterPro:IPR012929); FUNCTIONS IN: molecular_function unknown; INVOLVED IN: poly(A)+ mRNA export from nucleus, stamen development, negative regulation of protein sumoylation, negative regulation of flower development; LOCATED IN: cytosol, nuclear envelope, nucleolus, chloroplast; EXPRESSED IN: 26 plant struc…	Tetratricopeptide, MLP1/MLP2-like
70.9362	11.0811	AT1G79350	14	77	GTAG	GTAG	RING/FYVE/PHD zinc finger superfamily protein	embryo defective 1135 (EMB1135); FUNCTIONS IN: DNA binding, zinc ion binding; INVOLVED IN: regulation of transcription, DNA-dependent, embryo development ending in seed dormancy; LOCATED IN: chloroplast; EXPRESSED IN: 25 plant structures; EXPRESSED DURING: 15 growth stages; CONTAINS InterPro DOMAIN/s: Zinc finger, PHD-type, conserved site (InterPro:IPR019786), Zinc finger, PHD-type (InterPro:IPR0…	P-loop containing nucleoside triphosphate hydrolase | Protein strawberry notch | Strawberry notch, helicase C domain | Zinc finger, FYVE/PHD-type | Zinc finger, PHD-finger | Zinc finger, PHD-type | Zinc finger, PHD-type, conserved site | Zinc finger, RING/FYVE/PHD-type
3.02579	3.81662	AT1G79600	2	117	GTAG	GTAG	Protein kinase superfamily protein	Protein kinase superfamily protein; FUNCTIONS IN: protein kinase activity, ATP binding; INVOLVED IN: protein amino acid phosphorylation; LOCATED IN: chloroplast, plastoglobule; EXPRESSED IN: 21 plant structures; EXPRESSED DURING: 13 growth stages; CONTAINS InterPro DOMAIN/s: ABC-1 (InterPro:IPR004147), Protein kinase, catalytic domain (InterPro:IPR000719), Aminoglycoside phosphotransferase (Inter…	Aminoglycoside phosphotransferase | Armadillo-type fold | Protein kinase domain | Protein kinase-like domain | UbiB domain
5.80699	11.117	AT1G79690	15	79	GTAG	GTAG	nudix hydrolase homolog 3	nudix hydrolase homolog 3 (NUDT3); FUNCTIONS IN: dipeptidyl-peptidase activity, hydrolase activity; INVOLVED IN: proteolysis; LOCATED IN: cytosol, vacuole; EXPRESSED IN: 23 plant structures; EXPRESSED DURING: 13 growth stages; CONTAINS InterPro DOMAIN/s: NUDIX hydrolase domain-like (InterPro:IPR015797), Peptidase M49, dipeptidyl-peptidase III (InterPro:IPR005317), NUDIX hydrolase domain (InterPro…	NUDIX hydrolase domain | NUDIX hydrolase domain-like
5.81433	4.74033	AT1G79690	16	100	GTAG	GTAG	nudix hydrolase homolog 3	nudix hydrolase homolog 3 (NUDT3); FUNCTIONS IN: dipeptidyl-peptidase activity, hydrolase activity; INVOLVED IN: proteolysis; LOCATED IN: cytosol, vacuole; EXPRESSED IN: 23 plant structures; EXPRESSED DURING: 13 growth stages; CONTAINS InterPro DOMAIN/s: NUDIX hydrolase domain-like (InterPro:IPR015797), Peptidase M49, dipeptidyl-peptidase III (InterPro:IPR005317), NUDIX hydrolase domain (InterPro…	NUDIX hydrolase domain | NUDIX hydrolase domain-like
27.8745	43.645	AT1G79730	9	84	GTAG	GTAG	hydroxyproline-rich glycoprotein family protein	EARLY FLOWERING 7 (ELF7); CONTAINS InterPro DOMAIN/s: RNA polymerase II-associated, Paf1 (InterPro:IPR007133)	RNA polymerase II-associated, Paf1
2.69034	2.10599	AT1G79790	4	65	GTAG	GTAG	Haloacid dehalogenase-like hydrolase (HAD) superfamily protein	Haloacid dehalogenase-like hydrolase (HAD) superfamily protein; FUNCTIONS IN: hydrolase activity; LOCATED IN: chloroplast; EXPRESSED IN: 23 plant structures; EXPRESSED DURING: 13 growth stages; CONTAINS InterPro DOMAIN/s: HAD-superfamily hydrolase, subfamily IA, variant 3 (InterPro:IPR006402)	HAD hydrolase, subfamily IA | HAD-like domain
7.99897	8.96334	AT1G79810	4	100	GTAG	GTAG	Pex2/Pex12 N-terminal domain-containing protein / zinc finger (C3HC4-type RING finger) family protein	REVERSAL OF THE DET PHENOTYPE 3 (TED3); FUNCTIONS IN: zinc ion binding; INVOLVED IN: protein import into peroxisome matrix, fatty acid beta-oxidation, peroxisome organization, photomorphogenesis; LOCATED IN: cytosol, peroxisome; EXPRESSED IN: 26 plant structures; EXPRESSED DURING: 16 growth stages; CONTAINS InterPro DOMAIN/s: Zinc finger, RING-type, conserved site (InterPro:IPR017907), Pex, N-ter…	Pex, N-terminal | Zinc finger, C3HC4 RING-type | Zinc finger, RING-type | Zinc finger, RING-type, conserved site | Zinc finger, RING/FYVE/PHD-type
8.55476	5.16085	AT1G79830	13	78	GTAG	GTAG	golgin candidate 5	golgin candidate 5 (GC5); FUNCTIONS IN: protein binding; INVOLVED IN: biological_process unknown; LOCATED IN: Golgi apparatus, cytoplasm; LOCATED IN: Golgi apparatus, nucleus, cytoplasm; EXPRESSED IN: 24 plant structures; EXPRESSED IN: 25 plant structures; EXPRESSED DURING: 15 growth stages; CONTAINS InterPro DOMAIN/s: TATA element modulatory factor 1 DNA binding (InterPro:IPR022092), TATA elemen…	TATA element modulatory factor 1 DNA binding | TATA element modulatory factor 1 TATA binding
5.22923	4.29214	AT1G79880	9	85	GTAG	GTAG	structural molecules	structural molecules; FUNCTIONS IN: structural molecule activity; LOCATED IN: endomembrane system, COPI vesicle coat, Golgi membrane; INVOLVED IN: intracellular protein transport, vesicle-mediated transport; LOCATED IN: membrane coat, COPI vesicle coat; LOCATED IN: membrane coat, endomembrane system, COPI vesicle coat; CONTAINS InterPro DOMAIN/s: Integral membrane protein SYS1 (InterPro:IPR016973…	Coatomer beta' subunit (COPB2) | Coatomer, WD associated region | G-protein beta WD-40 repeat | Integral membrane protein SYS1 | Integral membrane protein SYS1-related | WD40 repeat | WD40-repeat-containing domain | WD40/YVTN repeat-like-containing domain
12.0081	16.9974	AT1G79990	15	94	GTAG	GTAG	structural molecules	structural molecules; FUNCTIONS IN: structural molecule activity; LOCATED IN: endomembrane system, COPI vesicle coat, Golgi membrane; INVOLVED IN: intracellular protein transport, vesicle-mediated transport; LOCATED IN: membrane coat, COPI vesicle coat; LOCATED IN: membrane coat, endomembrane system, COPI vesicle coat; CONTAINS InterPro DOMAIN/s: Integral membrane protein SYS1 (InterPro:IPR016973…	Coatomer beta' subunit (COPB2) | Coatomer, WD associated region | G-protein beta WD-40 repeat | Integral membrane protein SYS1 | Integral membrane protein SYS1-related | WD40 repeat | WD40-repeat-containing domain | WD40/YVTN repeat-like-containing domain
31.1922	49.3195	AT1G79990	24	103	GTAG	GTAG	structural molecules	structural molecules; FUNCTIONS IN: structural molecule activity; LOCATED IN: endomembrane system, COPI vesicle coat, Golgi membrane; INVOLVED IN: intracellular protein transport, vesicle-mediated transport; LOCATED IN: membrane coat, COPI vesicle coat; LOCATED IN: membrane coat, endomembrane system, COPI vesicle coat; CONTAINS InterPro DOMAIN/s: Integral membrane protein SYS1 (InterPro:IPR016973…	Coatomer beta' subunit (COPB2) | Coatomer, WD associated region | G-protein beta WD-40 repeat | Integral membrane protein SYS1 | Integral membrane protein SYS1-related | WD40 repeat | WD40-repeat-containing domain | WD40/YVTN repeat-like-containing domain
7.14811	19.2831	AT1G80410	2	91	GTAG	GTAG	tetratricopeptide repeat (TPR)-containing protein	EMBRYO DEFECTIVE 2753 (EMB2753); FUNCTIONS IN: binding; INVOLVED IN: embryo development ending in seed dormancy; EXPRESSED IN: 23 plant structures; LOCATED IN: membrane; EXPRESSED DURING: 14 growth stages; CONTAINS InterPro DOMAIN/s: Tetratricopeptide TPR-1 (InterPro:IPR001440), Tetratricopeptide-like helical (InterPro:IPR011990), Tetratricopeptide repeat-containing (InterPro:IPR013026), N-termin…	N-terminal acetyltransferase A, auxiliary subunit | Tetratricopeptide repeat | Tetratricopeptide repeat-containing domain | Tetratricopeptide-like helical domain
8.28391	25.2909	AT1G80560	2	109	GTAG	GTAG	isopropylmalate dehydrogenase 2	isopropylmalate dehydrogenase 2 (IMD2); FUNCTIONS IN: 3-isopropylmalate dehydrogenase activity; INVOLVED IN: leucine biosynthetic process, metabolic process; LOCATED IN: chloroplast, chloroplast stroma, plastid, chloroplast envelope; EXPRESSED IN: 22 plant structures; EXPRESSED DURING: 14 growth stages; CONTAINS InterPro DOMAIN/s: Isopropylmalate dehydrogenase (InterPro:IPR004429), Isocitrate/iso…	Isocitrate and isopropylmalate dehydrogenases family | Isocitrate/isopropylmalate dehydrogenase, conserved site | Isopropylmalate dehydrogenase | Isopropylmalate dehydrogenase-like domain
10.8934	10.2056	AT1G80670	8	86	GTAG	GTAG	Transducin/WD40 repeat-like superfamily protein	Transducin/WD40 repeat-like superfamily protein; CONTAINS InterPro DOMAIN/s: WD40 repeat 2 (InterPro:IPR019782), WD40 repeat-like-containing domain (InterPro:IPR011046), WD40-repeat-containing domain (InterPro:IPR017986), WD40 repeat (InterPro:IPR001680), WD40/YVTN repeat-like-containing domain (InterPro:IPR015943), WD40 repeat, subgroup (InterPro:IPR019781), G-protein beta WD-40 repeat, region (…	G-protein beta WD-40 repeat | WD40 repeat | WD40-repeat-containing domain | WD40/YVTN repeat-like-containing domain
9.79829	6.21783	AT1G80750	4	104	GTAG	GTAG	Ribosomal protein L30/L7 family protein	Ribosomal protein L30/L7 family protein; FUNCTIONS IN: structural constituent of ribosome, transcription regulator activity; INVOLVED IN: translation; LOCATED IN: cytosolic large ribosomal subunit, nucleolus, large ribosomal subunit; EXPRESSED IN: 22 plant structures; EXPRESSED DURING: 13 growth stages; CONTAINS InterPro DOMAIN/s: Ribosomal protein L30, N-terminal (InterPro:IPR012988), Ribosomal …	Ribosomal protein L30, N-terminal | Ribosomal protein L30, ferredoxin-like fold domain | Ribosomal protein L7, eukaryotic
2.93533	3.64424	AT1G80770	4	90	GTAG	GTAG	P-loop containing nucleoside triphosphate hydrolases superfamily protein	pigment defective 318 (PDE318); FUNCTIONS IN: GTP binding; FUNCTIONS IN: ferrous iron transmembrane transporter activity, GTP binding; EXPRESSED IN: 21 plant structures; INVOLVED IN: ferrous iron transport; EXPRESSED DURING: 13 growth stages; LOCATED IN: integral to membrane; CONTAINS InterPro DOMAIN/s: GTP1/OBG (InterPro:IPR006073), Nucleolar GTP-binding 1 (InterPro:IPR010674); BEST Arabidopsis …	Ferrous iron transport protein B, N-terminal | GTP binding domain | Nucleolar GTP-binding protein 1, Rossman-fold domain | P-loop containing nucleoside triphosphate hydrolase
2.51528	3.96548	AT1G80900	3	70	GTAG	GTAG	magnesium transporter 1	magnesium transporter 1 (MGT1); FUNCTIONS IN: magnesium ion transmembrane transporter activity, metal ion transmembrane transporter activity; INVOLVED IN: transmembrane transport, metal ion transport; LOCATED IN: membrane; EXPRESSED IN: 29 plant structures; EXPRESSED DURING: 13 growth stages; CONTAINS InterPro DOMAIN/s: Mg2+ transporter protein, CorA-like (InterPro:IPR002523); BEST Arabidopsis th…	Magnesium transporter MRS2/LPE10 | Mg2+ transporter protein, CorA-like/Zinc transport protein ZntB
11.4381	5.69772	AT1G80910	1	186	GTAG	GTAG	Protein of unknown function (DUF1712)	Protein of unknown function (DUF1712); CONTAINS InterPro DOMAIN/s: Protein of unknown function DUF1712, fungi (InterPro:IPR013176); BEST Arabidopsis thaliana protein match is: Protein of unknown function (DUF1712) (TAIR:AT1G16020.2)	Protein of unknown function DUF1712, fungi
54.0106	31.9195	AT2G01060	5	282	GTAG	GTAG	myb-like HTH transcriptional regulator family protein	myb-like HTH transcriptional regulator family protein; BEST Arabidopsis thaliana protein match is: myb-like HTH transcriptional regulator family protein (TAIR:AT3G13040.2); CONTAINS InterPro DOMAIN/s: Homeodomain-like (InterPro:IPR009057), Myb, DNA-binding (InterPro:IPR014778), Myb-like DNA-binding domain, SHAQKYF class (InterPro:IPR006447), HTH transcriptional regulator, Myb-type, DNA-binding (I…	Homeodomain-like | MYB-CC type transcription factor, LHEQLE-containing domain | Myb domain | Myb domain, plants | SANT/Myb domain
3.10369	2.94956	AT2G01350	4	132	GTAG	GTAG	quinolinate phoshoribosyltransferase	quinolinate phoshoribosyltransferase (QPT); FUNCTIONS IN: nicotinate-nucleotide diphosphorylase (carboxylating) activity; INVOLVED IN: NAD biosynthetic process; LOCATED IN: chloroplast; EXPRESSED IN: 23 plant structures; EXPRESSED DURING: 13 growth stages; CONTAINS InterPro DOMAIN/s: Aldolase-type TIM barrel (InterPro:IPR013785), Nicotinate-nucleotide pyrophosphorylase (InterPro:IPR004393), Quino…	Aldolase-type TIM barrel | Nicotinate-nucleotide pyrophosphorylase | Nicotinate-nucleotide pyrophosphorylase/Putative pyrophosphorylase ModD | Quinolinate phosphoribosyl transferase, C-terminal | Quinolinate phosphoribosyl transferase, N-terminal
5.44	8.96384	AT2G01450	7	117	GTAG	GTAG	MAP kinase 17	MAP kinase 17 (MPK17); CONTAINS InterPro DOMAIN/s: MAP kinase, conserved site (InterPro:IPR003527), Protein kinase, ATP binding site (InterPro:IPR017441), Protein kinase, catalytic domain (InterPro:IPR000719), Serine/threonine-protein kinase domain (InterPro:IPR002290), Tyrosine-protein kinase, catalytic domain (InterPro:IPR020635), Serine/threonine-protein kinase-like domain (InterPro:IPR017442)…	Mitogen-activated protein (MAP) kinase, conserved site | Protein kinase domain | Protein kinase, ATP binding site | Protein kinase-like domain | Serine/threonine/dual specificity protein kinase, catalytic domain
9.239	10.5465	AT2G01490	1	95	GTAG	GTAG	phytanoyl-CoA dioxygenase (PhyH) family protein	phytanoyl-CoA dioxygenase (PhyH) family protein; FUNCTIONS IN: phytanoyl-CoA dioxygenase activity; INVOLVED IN: N-terminal protein myristoylation; LOCATED IN: plasma membrane; EXPRESSED IN: 25 plant structures; EXPRESSED DURING: 15 growth stages; CONTAINS InterPro DOMAIN/s: Phytanoyl-CoA dioxygenase (InterPro:IPR008775)	Phytanoyl-CoA dioxygenase
3.72799	5.06443	AT2G01590	1	97	GTAG	GTAG	chlororespiratory reduction 3	CHLORORESPIRATORY REDUCTION 3 (CRR3); FUNCTIONS IN: molecular_function unknown; INVOLVED IN: photosynthetic electron transport in photosystem I; LOCATED IN: chloroplast, NAD(P)H dehydrogenase complex (plastoquinone), membrane; EXPRESSED IN: 22 plant structures; EXPRESSED DURING: 15 growth stages
5.79174	12.4627	AT2G01620	2	81	GTAG	GTAG	RNI-like superfamily protein	maternal effect embryo arrest 11 (MEE11); BEST Arabidopsis thaliana protein match is: Ribonuclease inhibitor (TAIR:AT3G26000.1)
12.1671	8.16978	AT2G01760	1	84	GTAG	GTAG	response regulator 14	response regulator 14 (RR14); CONTAINS InterPro DOMAIN/s: Response regulator, plant B-type (InterPro:IPR017053), Myb-like DNA-binding domain, SHAQKYF class (InterPro:IPR006447), CheY-like (InterPro:IPR011006), Homeodomain-like (InterPro:IPR009057), Myb, DNA-binding (InterPro:IPR014778), Signal transduction response regulator, receiver domain (InterPro:IPR001789), Homeodomain-related (InterPro:IPR…	CheY-like superfamily | Homeodomain-like | Myb domain | Myb domain, plants | Response regulator, plant B-type | SANT/Myb domain | Signal transduction response regulator, receiver domain
3.82996	6.73534	AT2G02400	1	80	GTAG	GTAG	NAD(P)-binding Rossmann-fold superfamily protein	NAD(P)-binding Rossmann-fold superfamily protein; FUNCTIONS IN: coenzyme binding, binding, cinnamoyl-CoA reductase activity, catalytic activity; INVOLVED IN: lignin biosynthetic process, cellular metabolic process, metabolic process; LOCATED IN: plasma membrane; EXPRESSED IN: 23 plant structures; EXPRESSED DURING: 15 growth stages; CONTAINS InterPro DOMAIN/s: NAD-dependent epimerase/dehydratase (…	NAD(P)-binding domain | NAD-dependent epimerase/dehydratase, N-terminal domain
9.88491	5.8001	AT2G02410	2	115	GTAG	GTAG		unknown protein; FUNCTIONS IN: molecular_function unknown; INVOLVED IN: biological_process unknown; EXPRESSED IN: 21 plant structures; EXPRESSED DURING: 13 growth stages; CONTAINS InterPro DOMAIN/s: Protein of unknown function DUF901 (InterPro:IPR010298)	Protein of unknown function DUF901
13.1753	8.05706	AT2G02560	26	90	GCAG	GCAG	cullin-associated and neddylation dissociated	cullin-associated and neddylation dissociated (CAND1); FUNCTIONS IN: binding; INVOLVED IN: xylem and phloem pattern formation, response to auxin stimulus, vegetative to reproductive phase transition of meristem; LOCATED IN: cell wall, plasma membrane; EXPRESSED IN: 25 plant structures; EXPRESSED DURING: 13 growth stages; CONTAINS InterPro DOMAIN/s: Armadillo-like helical (InterPro:IPR011989), Arm…	Armadillo-like helical | Armadillo-type fold | TATA-binding protein interacting (TIP20)
431.121	64.0788	AT2G02970	4	142	GTAG	GTAG	GDA1/CD39 nucleoside phosphatase family protein	GDA1/CD39 nucleoside phosphatase family protein; FUNCTIONS IN: hydrolase activity; INVOLVED IN: biological_process unknown; EXPRESSED IN: 24 plant structures; EXPRESSED DURING: 15 growth stages; CONTAINS InterPro DOMAIN/s: Nucleoside phosphatase GDA1/CD39 (InterPro:IPR000407); BEST Arabidopsis thaliana protein match is: GDA1/CD39 nucleoside phosphatase family protein (TAIR:AT1G14230.1)	Nucleoside phosphatase GDA1/CD39
2.81592	2.15196	AT2G03310	1	83	GTAG	GTAG		unknown protein
3.33837	3.68986	AT2G03690	1	209	GTAG	GTAG	coenzyme Q biosynthesis Coq4 family protein / ubiquinone biosynthesis Coq4 family protein	coenzyme Q biosynthesis Coq4 family protein / ubiquinone biosynthesis Coq4 family protein; FUNCTIONS IN: molecular_function unknown; INVOLVED IN: ubiquinone biosynthetic process; EXPRESSED IN: 24 plant structures; EXPRESSED DURING: 14 growth stages; CONTAINS InterPro DOMAIN/s: Coenzyme Q biosynthesis Coq4 (InterPro:IPR007715)	Ubiquinone biosynthesis protein Coq4 | Ubiquinone biosynthesis protein Coq4, eukaryotes
9.10759	5.60858	AT2G04400	6	85	GTAG	GTAG	Aldolase-type TIM barrel family protein	Aldolase-type TIM barrel family protein; FUNCTIONS IN: indole-3-glycerol-phosphate synthase activity, copper ion binding; INVOLVED IN: tryptophan biosynthetic process; LOCATED IN: chloroplast; EXPRESSED IN: 24 plant structures; EXPRESSED DURING: 15 growth stages; CONTAINS InterPro DOMAIN/s: Aldolase-type TIM barrel (InterPro:IPR013785), Ribulose-phosphate binding barrel (InterPro:IPR011060), Indo…	Aldolase-type TIM barrel | Indole-3-glycerol phosphate synthase | Indole-3-glycerol phosphate synthase, conserved site | Ribulose-phosphate binding barrel
22.2938	13.9439	AT2G04550	4	78	GCAG	GCAG	indole-3-butyric acid response 5	indole-3-butyric acid response 5 (IBR5); CONTAINS InterPro DOMAIN/s: Protein-tyrosine phosphatase, active site (InterPro:IPR016130), Dual-specific/protein-tyrosine phosphatase, conserved region (InterPro:IPR000387), Dual specificity phosphatase, catalytic domain (InterPro:IPR000340), Dual specificity phosphatase, subgroup, catalytic domain (InterPro:IPR020422); BEST Arabidopsis thaliana protein m…	Dual specificity phosphatase | Dual specificity phosphatase, catalytic domain | Dual specificity phosphatase, subgroup, catalytic domain | Protein-tyrosine phosphatase, active site | Protein-tyrosine phosphatase-like | Protein-tyrosine/Dual specificity phosphatase
2.5324	2.26888	AT2G05160	2	79	GTAG	GTAG	CCCH-type zinc fingerfamily protein with RNA-binding domain	CCCH-type zinc fingerfamily protein with RNA-binding domain; FUNCTIONS IN: RNA binding, nucleotide binding, zinc ion binding, nucleic acid binding; INVOLVED IN: biological_process unknown; LOCATED IN: cellular_component unknown; EXPRESSED IN: 6 plant structures; EXPRESSED DURING: 4 anthesis, petal differentiation and expansion stage; CONTAINS InterPro DOMAIN/s: Zinc finger, CCCH-type (InterPro:IP…	Nucleotide-binding, alpha-beta plait | OST-HTH/LOTUS domain | RNA recognition motif domain | Zinc finger, CCCH-type
4.41705	3.6041	AT2G05840	3	64	GTAG	GTAG	20S proteasome subunit PAA2	20S proteasome subunit PAA2 (PAA2); FUNCTIONS IN: peptidase activity, endopeptidase activity, threonine-type endopeptidase activity; INVOLVED IN: ubiquitin-dependent protein catabolic process; LOCATED IN: proteasome core complex, proteasome complex, cytosolic ribosome; EXPRESSED IN: fruit, guard cell, cultured cell; EXPRESSED DURING: seed development stages; CONTAINS InterPro DOMAIN/s: Proteasome…	Nucleophile aminohydrolases, N-terminal | Proteasome A-type subunit | Proteasome alpha-subunit, N-terminal domain | Proteasome, subunit alpha/beta
7.23145	6.40386	AT2G06010	1	828	GTAG	GTAG	OBP3-responsive gene 4	OBP3-responsive gene 4 (ORG4)
3.21247	4.76024	AT2G07050	6	256	GTAG	GTAG	cycloartenol synthase 1	cycloartenol synthase 1 (CAS1); FUNCTIONS IN: cycloartenol synthase activity; INVOLVED IN: pentacyclic triterpenoid biosynthetic process, thylakoid membrane organization, pollen development; LOCATED IN: vacuole; EXPRESSED IN: 24 plant structures; EXPRESSED DURING: 13 growth stages; CONTAINS InterPro DOMAIN/s: Terpene synthase, conserved site (InterPro:IPR002365), Terpenoid cylases/protein prenylt…	Prenyltransferase/squalene oxidase | Squalene cyclase | Terpene synthase, conserved site | Terpenoid cyclases/protein prenyltransferase alpha-alpha toroid
25.3742	71.9331	AT2G07680	18	76	GTAG	GTAG	multidrug resistance-associated protein 11	multidrug resistance-associated protein 11 (MRP11); FUNCTIONS IN: ATPase activity, coupled to transmembrane movement of substances; INVOLVED IN: transport, transmembrane transport; LOCATED IN: plasma membrane; EXPRESSED IN: 24 plant structures; EXPRESSED DURING: 12 growth stages; CONTAINS InterPro DOMAIN/s: ATPase, AAA+ type, core (InterPro:IPR003593), ABC transporter-like (InterPro:IPR003439), A…
3.54346	5.56579	AT2G13540	10	462	GTAG	GTAG	ARM repeat superfamily protein	ABA HYPERSENSITIVE 1 (ABH1); CONTAINS InterPro DOMAIN/s: MIF4G-like, type 2 (InterPro:IPR015174), MIF4G-like, type 1 (InterPro:IPR015172), Armadillo-type fold (InterPro:IPR016024), MIF4G-like, type 3 (InterPro:IPR003890), MIF4-like, type 1/2/3 (InterPro:IPR016021)	Armadillo-type fold | MIF4-like, type 1/2/3 | MIF4G-like, type 1 | MIF4G-like, type 2 | MIF4G-like, type 3 | Nuclear cap-binding protein subunit 1
5.49453	13.845	AT2G14120	11	232	GTAG	GTAG	dynamin related protein	dynamin related protein (DRP3B); FUNCTIONS IN: GTP binding, GTPase activity; INVOLVED IN: post-embryonic development, peroxisome fission, mitochondrial fission; LOCATED IN: mitochondrion, peroxisome; LOCATED IN: mitochondrion, peroxisome, plasma membrane; EXPRESSED IN: 24 plant structures; EXPRESSED IN: 25 plant structures; EXPRESSED DURING: 14 growth stages; CONTAINS InterPro DOMAIN/s: Dynamin G…	Dynamin GTPase effector | Dynamin central domain | Dynamin superfamily | Dynamin, GTPase domain | Dynamin, GTPase region, conserved site | GTPase effector domain, GED | P-loop containing nucleoside triphosphate hydrolase
13.1824	4.926	AT2G14120	6	146	GTAG	GTAG	dynamin related protein	dynamin related protein (DRP3B); FUNCTIONS IN: GTP binding, GTPase activity; INVOLVED IN: post-embryonic development, peroxisome fission, mitochondrial fission; LOCATED IN: mitochondrion, peroxisome; LOCATED IN: mitochondrion, peroxisome, plasma membrane; EXPRESSED IN: 24 plant structures; EXPRESSED IN: 25 plant structures; EXPRESSED DURING: 14 growth stages; CONTAINS InterPro DOMAIN/s: Dynamin G…	Dynamin GTPase effector | Dynamin central domain | Dynamin superfamily | Dynamin, GTPase domain | Dynamin, GTPase region, conserved site | GTPase effector domain, GED | P-loop containing nucleoside triphosphate hydrolase
6.19843	7.20513	AT2G14260	5	93	GTAG	GTAG	proline iminopeptidase	proline iminopeptidase (PIP); FUNCTIONS IN: aminopeptidase activity; INVOLVED IN: proteolysis; LOCATED IN: chloroplast; EXPRESSED IN: 25 plant structures; EXPRESSED DURING: 15 growth stages; CONTAINS InterPro DOMAIN/s: Peptidase S33, proline iminopeptidase 1 (InterPro:IPR005944), Peptidase S33, prolyl aminopeptidase (InterPro:IPR002410), Alpha/beta hydrolase fold-1 (InterPro:IPR000073)	Alpha/Beta hydrolase fold | Alpha/beta hydrolase fold-1 | Peptidase S33 | Proline iminopeptidase
17.094	13.5388	AT2G14260	5	93	GTAG	GTAG	proline iminopeptidase	proline iminopeptidase (PIP); FUNCTIONS IN: aminopeptidase activity; INVOLVED IN: proteolysis; LOCATED IN: chloroplast; EXPRESSED IN: 25 plant structures; EXPRESSED DURING: 15 growth stages; CONTAINS InterPro DOMAIN/s: Peptidase S33, proline iminopeptidase 1 (InterPro:IPR005944), Peptidase S33, prolyl aminopeptidase (InterPro:IPR002410), Alpha/beta hydrolase fold-1 (InterPro:IPR000073)	Alpha/Beta hydrolase fold | Alpha/beta hydrolase fold-1 | Peptidase S33 | Proline iminopeptidase
6.50322	5.99487	AT2G14830	2	767	GTAG	GTAG	Regulator of Vps4 activity in the MVB pathway protein	Regulator of Vps4 activity in the MVB pathway protein; CONTAINS InterPro DOMAIN/s: Protein of unknown function DUF292, eukaryotic (InterPro:IPR005061); FUNCTIONS IN: zinc ion binding; BEST Arabidopsis thaliana protein match is: Regulator of Vps4 activity in the MVB pathway protein (TAIR:AT1G51900.1); INVOLVED IN: biological_process unknown; LOCATED IN: cellular_component unknown; EXPRESSED IN: sp…	Domain of unknown function DUF292, eukaryotic | Histone deacetylase superfamily | Zinc finger, RING/FYVE/PHD-type | Zinc finger, UBP-type
6.82726	9.05597	AT2G15240	8	420	GTAG	GTAG	UNC-50 family protein	UNC-50 family protein; CONTAINS InterPro DOMAIN/s: UNC-50 (InterPro:IPR007881)	UNC-50
2.77681	3.25041	AT2G15280	3	77	GTAG	GTAG	Reticulon family protein	Reticulon family protein; FUNCTIONS IN: molecular_function unknown; INVOLVED IN: biological_process unknown; LOCATED IN: endoplasmic reticulum; EXPRESSED IN: 24 plant structures; EXPRESSED DURING: 15 growth stages; CONTAINS InterPro DOMAIN/s: Reticulon (InterPro:IPR003388); BEST Arabidopsis thaliana protein match is: Reticulon family protein (TAIR:AT3G19460.1)	Reticulon
3.8306	5.77931	AT2G16400	1	96	GTAG	GTAG	BEL1-like homeodomain 7	BEL1-like homeodomain 7 (BLH7); FUNCTIONS IN: DNA binding, sequence-specific DNA binding transcription factor activity; INVOLVED IN: regulation of transcription, DNA-dependent, regulation of transcription; EXPRESSED IN: 22 plant structures; EXPRESSED DURING: 13 growth stages; CONTAINS InterPro DOMAIN/s: Homeobox (InterPro:IPR001356), Homeodomain-like (InterPro:IPR009057), POX (InterPro:IPR006563)…	Homeobox KN domain | Homeobox domain | Homeodomain-like | POX domain
4.62534	3.63918	AT2G16400	2	81	GTAG	GTAG	BEL1-like homeodomain 7	BEL1-like homeodomain 7 (BLH7); FUNCTIONS IN: DNA binding, sequence-specific DNA binding transcription factor activity; INVOLVED IN: regulation of transcription, DNA-dependent, regulation of transcription; EXPRESSED IN: 22 plant structures; EXPRESSED DURING: 13 growth stages; CONTAINS InterPro DOMAIN/s: Homeobox (InterPro:IPR001356), Homeodomain-like (InterPro:IPR009057), POX (InterPro:IPR006563)…	Homeobox KN domain | Homeobox domain | Homeodomain-like | POX domain
4.97725	5.38879	AT2G16700	1	60	GTAG	GTAG	actin depolymerizing factor 5	actin depolymerizing factor 5 (ADF5); FUNCTIONS IN: actin binding; INVOLVED IN: biological_process unknown; LOCATED IN: intracellular; EXPRESSED IN: 22 plant structures; EXPRESSED DURING: 13 growth stages; CONTAINS InterPro DOMAIN/s: Actin-binding, cofilin/tropomyosin type (InterPro:IPR002108); CONTAINS InterPro DOMAIN/s: Diguanylate phosphodiesterase, predicted (InterPro:IPR001633), Actin-bindin…	ADF-H/Gelsolin-like domain | ADF/Cofilin/Destrin | Actin-depolymerising factor homology domain | EAL domain
43.5505	33.948	AT2G16920	6	475	GTAG	GTAG	ubiquitin-conjugating enzyme 23	ubiquitin-conjugating enzyme 23 (UBC23); FUNCTIONS IN: ubiquitin-protein ligase activity, small conjugating protein ligase activity; INVOLVED IN: regulation of protein metabolic process, post-translational protein modification; LOCATED IN: cellular_component unknown; EXPRESSED IN: 24 plant structures; EXPRESSED DURING: 15 growth stages; CONTAINS InterPro DOMAIN/s: Ubiquitin-conjugating enzyme/RWD…	Ubiquitin-conjugating enzyme, E2 | Ubiquitin-conjugating enzyme/RWD-like
36.5712	7.32256	AT2G16940	8	208	GTAG	GTAG	Splicing factor, CC1-like	Splicing factor, CC1-like; FUNCTIONS IN: RNA binding, nucleotide binding, nucleic acid binding; INVOLVED IN: mRNA processing; LOCATED IN: nucleus; EXPRESSED IN: 23 plant structures; EXPRESSED IN: 24 plant structures; EXPRESSED DURING: 13 growth stages; CONTAINS InterPro DOMAIN/s: RNA recognition motif, RNP-1 (InterPro:IPR000504), Splicing factor, CC1-like (InterPro:IPR006509), Nucleotide-binding,…	Nucleotide-binding, alpha-beta plait | RNA recognition motif domain | Splicing factor RBM39, linker | Splicing factor, RBM39-like
6.98499	7.85267	AT2G17250	4	83	GTAG	GTAG	CCAAT-binding factor	EMBRYO DEFECTIVE 2762 (EMB2762); FUNCTIONS IN: molecular_function unknown; INVOLVED IN: biological_process unknown; LOCATED IN: membrane; EXPRESSED IN: 22 plant structures; EXPRESSED DURING: 13 growth stages; CONTAINS InterPro DOMAIN/s: CCAAT-binding factor (InterPro:IPR005612)	CCAAT-binding factor | Nucleolar complex protein 4
4.46019	6.19728	AT2G17290	4	92	GTAG	GTAG	Calcium-dependent protein kinase family protein	calcium dependent protein kinase 6 (CPK6); FUNCTIONS IN: in 6 functions; INVOLVED IN: regulation of anion channel activity, protein amino acid phosphorylation, N-terminal protein myristoylation, abscisic acid mediated signaling pathway, regulation of stomatal movement; LOCATED IN: cytosol, plasma membrane, membrane; EXPRESSED IN: 26 plant structures; EXPRESSED DURING: 15 growth stages; CONTAINS I…	EF-Hand 1, calcium-binding site | EF-hand domain | EF-hand domain pair | Protein kinase domain | Protein kinase, ATP binding site | Protein kinase-like domain | Serine/threonine-protein kinase, active site | Serine/threonine/dual specificity protein kinase, catalytic domain
3.85135	4.09152	AT2G17790	20	79	GTAG	GTAG	VPS35 homolog A	VPS35 homolog A (VPS35A); CONTAINS InterPro DOMAIN/s: Vacuolar protein sorting-associated protein 35 (InterPro:IPR005378); BEST Arabidopsis thaliana protein match is: VPS35 homolog B (TAIR:AT1G75850.1)	Vacuolar protein sorting-associated protein 35, Vps35
7.144	38.6396	AT2G17790	14	189	GTAG	GTAG	VPS35 homolog A	VPS35 homolog A (VPS35A); CONTAINS InterPro DOMAIN/s: Vacuolar protein sorting-associated protein 35 (InterPro:IPR005378); BEST Arabidopsis thaliana protein match is: VPS35 homolog B (TAIR:AT1G75850.1)	Vacuolar protein sorting-associated protein 35, Vps35
2.45779	2.19022	AT2G17970	1	86	GTAG	GTAG	2-oxoglutarate (2OG) and Fe(II)-dependent oxygenase superfamily protein	2-oxoglutarate (2OG) and Fe(II)-dependent oxygenase superfamily protein; FUNCTIONS IN: oxidoreductase activity; INVOLVED IN: biological_process unknown; LOCATED IN: cellular_component unknown; EXPRESSED IN: 15 plant structures; EXPRESSED DURING: 7 growth stages; CONTAINS InterPro DOMAIN/s: Oxoglutarate/iron-dependent oxygenase (InterPro:IPR005123); BEST Arabidopsis thaliana protein match is: oxid…	Alpha-ketoglutarate-dependent dioxygenase AlkB-like | Oxoglutarate/iron-dependent dioxygenase
15.7861	29.8232	AT2G18300	6	78	GTAG	GTAG	basic helix-loop-helix (bHLH) DNA-binding superfamily protein	basic helix-loop-helix (bHLH) DNA-binding superfamily protein; FUNCTIONS IN: sequence-specific DNA binding transcription factor activity; INVOLVED IN: response to cytokinin stimulus, regulation of transcription; LOCATED IN: nucleus; EXPRESSED IN: 13 plant structures; EXPRESSED DURING: 8 growth stages; CONTAINS InterPro DOMAIN/s: Helix-loop-helix DNA-binding domain (InterPro:IPR001092), Helix-loop…	Myc-type, basic helix-loop-helix (bHLH) domain
8.85733	5.49072	AT2G18876	4	126	GTAG	GTAG	Afadin/alpha-actinin-binding protein	Afadin/alpha-actinin-binding protein; CONTAINS InterPro DOMAIN/s: Afadin/alpha-actinin-binding (InterPro:IPR021622); BEST Arabidopsis thaliana protein match is: Afadin/alpha-actinin-binding protein (TAIR:AT5G57410.2); BEST Arabidopsis thaliana protein match is: Afadin/alpha-actinin-binding protein (TAIR:AT5G57410.3)	Afadin/alpha-actinin-binding
40.5549	411.492	AT2G19470	6	79	GTAG	GTAG	casein kinase I-like 5	casein kinase I-like 5 (ckl5); FUNCTIONS IN: protein serine/threonine kinase activity, protein kinase activity, kinase activity, ATP binding; INVOLVED IN: protein amino acid phosphorylation; LOCATED IN: cytoplasm; EXPRESSED IN: 24 plant structures; EXPRESSED DURING: 13 growth stages; CONTAINS InterPro DOMAIN/s: Protein kinase, ATP binding site (InterPro:IPR017441), Protein kinase, catalytic domai…	Protein kinase domain | Protein kinase, ATP binding site | Protein kinase-like domain | Serine/threonine-protein kinase, active site
32.3308	65.6337	AT2G19520	7	73	GTAG	GTAG	Transducin family protein / WD-40 repeat family protein	FVE; FUNCTIONS IN: metal ion binding; INVOLVED IN: flower development, unidimensional cell growth, trichome morphogenesis, leaf morphogenesis; LOCATED IN: nucleolus, nucleus, CUL4 RING ubiquitin ligase complex, cytoplasm; EXPRESSED IN: guard cell; CONTAINS InterPro DOMAIN/s: Histone-binding protein RBBP4 (InterPro:IPR022052), WD40 repeat 2 (InterPro:IPR019782), WD40 repeat-like-containing domain …	Histone-binding protein RBBP4, N-terminal | WD40 repeat | WD40-repeat-containing domain | WD40/YVTN repeat-like-containing domain
5.8425	3.88823	AT2G19600	15	193	GCAG	GCAG	K+ efflux antiporter 4	K+ efflux antiporter 4 (KEA4); FUNCTIONS IN: potassium:hydrogen antiporter activity, potassium ion transmembrane transporter activity; INVOLVED IN: potassium ion transport, cation transport, transmembrane transport; LOCATED IN: endomembrane system, integral to membrane; EXPRESSED IN: 22 plant structures; EXPRESSED DURING: 13 growth stages; CONTAINS InterPro DOMAIN/s: Cation/H+ exchanger (InterPro…	Cation/H+ exchanger
3.8929	3.78631	AT2G19750	1	113	GTAG	GTAG	Ribosomal protein S30 family protein	Ribosomal protein S30 family protein; FUNCTIONS IN: structural constituent of ribosome; INVOLVED IN: translation; LOCATED IN: cytosolic small ribosomal subunit, ribosome; EXPRESSED IN: 22 plant structures; EXPRESSED DURING: 13 growth stages; CONTAINS InterPro DOMAIN/s: Ribosomal protein S30 (InterPro:IPR006846); BEST Arabidopsis thaliana protein match is: Ribosomal protein S30 family protein (TAI…	Ribosomal protein S30
3.40739	4.27595	AT2G19790	2	181	GTAG	GTAG	SNARE-like superfamily protein	SNARE-like superfamily protein; FUNCTIONS IN: protein transporter activity; INVOLVED IN: intracellular protein transport, transport, protein transport; LOCATED IN: clathrin vesicle coat; EXPRESSED IN: 24 plant structures; EXPRESSED DURING: 15 growth stages; CONTAINS InterPro DOMAIN/s: Adaptor protein complex, sigma subunit (InterPro:IPR016635), Longin-like (InterPro:IPR011012); BEST Arabidopsis t…	AP complex, mu/sigma subunit | Adaptor protein complex, sigma subunit | Longin-like domain
14.8028	13.7951	AT2G19830	3	97	GTAG	GTAG	SNF7 family protein	SNF7.2; INVOLVED IN: vesicle-mediated transport; LOCATED IN: ESCRT III complex, plasma membrane; EXPRESSED IN: 23 plant structures; EXPRESSED DURING: 15 growth stages; CONTAINS InterPro DOMAIN/s: Snf7 (InterPro:IPR005024); BEST Arabidopsis thaliana protein match is: SNF7 family protein (TAIR:AT4G29160.3)	Snf7
44.8418	32.5369	AT2G19950	17	113	GTAG	GTAG	golgin candidate 1	golgin candidate 1 (GC1); FUNCTIONS IN: molecular_function unknown; INVOLVED IN: biological_process unknown; LOCATED IN: Golgi apparatus; CONTAINS InterPro DOMAIN/s: Golgin subfamily A member 5 (InterPro:IPR019177); BEST Arabidopsis thaliana protein match is: golgin candidate 2 (TAIR:AT1G18190.1)	Golgin subfamily A member 5
28.0946	22.4672	AT2G20190	3	92	GTAG	GTAG	CLIP-associated protein	CLIP-associated protein (CLASP); FUNCTIONS IN: binding; INVOLVED IN: mitosis, protein stabilization, cell growth; LOCATED IN: spindle microtubule, plasma membrane; EXPRESSED IN: 25 plant structures; EXPRESSED DURING: 13 growth stages; CONTAINS InterPro DOMAIN/s: HEAT (InterPro:IPR000357), Armadillo-like helical (InterPro:IPR011989), HEAT, type 2 (InterPro:IPR021133), Armadillo-type fold (InterPro…	Armadillo-like helical | Armadillo-type fold | CLASP N-terminal domain | HEAT | HEAT, type 2
9.64138	44.9711	AT2G20210	2	92	GTAG	GTAG	RNI-like superfamily protein	RNI-like superfamily protein; LOCATED IN: endomembrane system; EXPRESSED IN: 12 plant structures; EXPRESSED DURING: 4 anthesis, F mature embryo stage, petal differentiation and expansion stage, E expanded cotyledon stage, D bilateral stage; CONTAINS InterPro DOMAIN/s: Leucine-rich repeat, ribonuclease inhibitor subtype (InterPro:IPR003590)
5.24471	9.07304	AT2G20420	9	86	GTAG	GTAG	ATP citrate lyase (ACL) family protein	ATP citrate lyase (ACL) family protein; FUNCTIONS IN: succinate-CoA ligase (GDP-forming) activity, copper ion binding, ATP binding; INVOLVED IN: response to cadmium ion, metabolic process; LOCATED IN: mitochondrion; EXPRESSED IN: 26 plant structures; EXPRESSED DURING: 16 growth stages; CONTAINS InterPro DOMAIN/s: Succinyl-CoA synthetase, beta subunit (InterPro:IPR005809), Succinyl-CoA synthetase,…	ATP-citrate lyase/succinyl-CoA ligase | ATP-grasp fold | ATP-grasp fold, subdomain 1 | ATP-grasp fold, subdomain 2 | ATP-grasp fold, succinyl-CoA synthetase-type | Succinyl-CoA synthetase, beta subunit | Succinyl-CoA synthetase, beta subunit, conserved site | Succinyl-CoA synthetase-like
10.2131	83.3253	AT2G20440	9	78	GTAG	GTAG	Ypt/Rab-GAP domain of gyp1p superfamily protein	Ypt/Rab-GAP domain of gyp1p superfamily protein; FUNCTIONS IN: RAB GTPase activator activity; INVOLVED IN: regulation of Rab GTPase activity; LOCATED IN: intracellular; EXPRESSED IN: male gametophyte, pollen tube; EXPRESSED DURING: L mature pollen stage, M germinated pollen stage; CONTAINS InterPro DOMAIN/s: RabGAP/TBC (InterPro:IPR000195); BEST Arabidopsis thaliana protein match is: Ypt/Rab-GAP …	Rab-GTPase-TBC domain
10.3855	33.6909	AT2G20530	5	97	GTAG	GTAG	prohibitin 6	prohibitin 6 (PHB6); INVOLVED IN: biological_process unknown; LOCATED IN: mitochondrion, plasma membrane, mitochondrial respiratory chain complex I, respiratory chain complex I, membrane; EXPRESSED IN: 11 plant structures; EXPRESSED DURING: M germinated pollen stage; CONTAINS InterPro DOMAIN/s: Prohibitin (InterPro:IPR000163), Band 7 protein (InterPro:IPR001107); BEST Arabidopsis thaliana protein…	Band 7 protein | Prohibitin
6.65845	4.93479	AT2G20610	2	82	GTAG	GTAG	Tyrosine transaminase family protein	SUPERROOT 1 (SUR1); FUNCTIONS IN: S-alkylthiohydroximate lyase activity, carbon-sulfur lyase activity, transaminase activity; INVOLVED IN: regulation of cell growth by extracellular stimulus, glucosinolate biosynthetic process, adventitious root development, indoleacetic acid biosynthetic process; LOCATED IN: membrane; EXPRESSED IN: 23 plant structures; EXPRESSED DURING: 13 growth stages; CONTAIN…	Aminotransferase, class I/classII | Pyridoxal phosphate-dependent transferase | Pyridoxal phosphate-dependent transferase, major region, subdomain 1 | Pyridoxal phosphate-dependent transferase, major region, subdomain 2 | Tyrosine transaminase | Tyrosine/nicotianamine aminotransferase
3.85048	6.29391	AT2G20680	3	115	GTAG	GTAG	Glycosyl hydrolase superfamily protein	Glycosyl hydrolase superfamily protein; FUNCTIONS IN: cation binding, hydrolase activity, hydrolyzing O-glycosyl compounds, catalytic activity; INVOLVED IN: carbohydrate metabolic process; LOCATED IN: endomembrane system; EXPRESSED IN: 23 plant structures; EXPRESSED DURING: 13 growth stages; CONTAINS InterPro DOMAIN/s: Glycoside hydrolase, catalytic core (InterPro:IPR017853), Glycoside hydrolase,…	Glycoside hydrolase, catalytic domain | Glycoside hydrolase, family 5 | Glycoside hydrolase, superfamily
2.12519	2.91042	AT2G20780	1	94	GTAG	GTAG	Major facilitator superfamily protein	Major facilitator superfamily protein; FUNCTIONS IN: carbohydrate transmembrane transporter activity, sugar:hydrogen symporter activity; INVOLVED IN: transport, transmembrane transport; LOCATED IN: integral to membrane, membrane; EXPRESSED IN: 22 plant structures; EXPRESSED DURING: 15 growth stages; CONTAINS InterPro DOMAIN/s: Sugar transporter, conserved site (InterPro:IPR005829), Major facilita…	General substrate transporter | Major facilitator superfamily domain | Major facilitator superfamily domain, general substrate transporter | Sugar transporter, conserved site | Sugar/inositol transporter
5.2618	3.40766	AT2G20840	7	98	GTAG	GTAG	Secretory carrier membrane protein (SCAMP) family protein	Secretory carrier membrane protein (SCAMP) family protein; FUNCTIONS IN: transmembrane transporter activity; INVOLVED IN: protein transport; LOCATED IN: plasma membrane; EXPRESSED IN: 24 plant structures; EXPRESSED DURING: 15 growth stages; CONTAINS InterPro DOMAIN/s: SCAMP (InterPro:IPR007273); BEST Arabidopsis thaliana protein match is: Secretory carrier membrane protein (SCAMP) family protein …	SCAMP
3.61717	6.07258	AT2G20900	9	93	GTAG	GTAG	diacylglycerol kinase 5	diacylglycerol kinase 5 (DGK5); FUNCTIONS IN: diacylglycerol kinase activity; INVOLVED IN: activation of protein kinase C activity by G-protein coupled receptor protein signaling pathway; LOCATED IN: cellular_component unknown; EXPRESSED IN: 25 plant structures; EXPRESSED DURING: 15 growth stages; CONTAINS InterPro DOMAIN/s: Diacylglycerol kinase, catalytic domain (InterPro:IPR001206), Diacylglyc…	ATP-NAD kinase-like domain | Diacylglycerol kinase, accessory domain | Diacylglycerol kinase, catalytic domain | Diacylglycerol kinase, plant
17.1085	27.5935	AT2G20990	2	93	GTAG	GTAG	synaptotagmin A	synaptotagmin A (SYTA); CONTAINS InterPro DOMAIN/s: C2 membrane targeting protein (InterPro:IPR018029), C2 calcium/lipid-binding domain, CaLB (InterPro:IPR008973), C2 region (InterPro:IPR020477), C2 calcium-dependent membrane targeting (InterPro:IPR000008); FUNCTIONS IN: molecular_function unknown; BEST Arabidopsis thaliana protein match is: Calcium-dependent lipid-binding (CaLB domain) family pr…	C2 domain
15.526	5.4781	AT2G21230	1	197	GAAG	GAAG	Basic-leucine zipper (bZIP) transcription factor family protein	Basic-leucine zipper (bZIP) transcription factor family protein; FUNCTIONS IN: DNA binding, sequence-specific DNA binding transcription factor activity; INVOLVED IN: regulation of transcription, DNA-dependent; LOCATED IN: chloroplast; EXPRESSED IN: 23 plant structures; EXPRESSED DURING: 13 growth stages; CONTAINS InterPro DOMAIN/s: Basic-leucine zipper (bZIP) transcription factor (InterPro:IPR004…	Basic-leucine zipper domain
9.74053	13.6113	AT2G21340	5	161	GTAG	GTAG	MATE efflux family protein	MATE efflux family protein; FUNCTIONS IN: antiporter activity, drug transmembrane transporter activity; INVOLVED IN: drug transmembrane transport, transmembrane transport; LOCATED IN: chloroplast; EXPRESSED IN: 22 plant structures; EXPRESSED DURING: 13 growth stages; CONTAINS InterPro DOMAIN/s: Multi antimicrobial extrusion protein MatE (InterPro:IPR002528); BEST Arabidopsis thaliana protein matc…	Multi antimicrobial extrusion protein
8.55716	6.04024	AT2G22475	2	1873	GTAG	GTAG	GRAM domain family protein	GL2-EXPRESSION MODULATOR (GEM); CONTAINS InterPro DOMAIN/s: GRAM (InterPro:IPR004182); BEST Arabidopsis thaliana protein match is: GRAM domain family protein (TAIR:AT4G40100.1)	GRAM domain
7.85791	4.70871	AT2G22540	2	286	GTAG	GTAG	K-box region and MADS-box transcription factor family protein	SHORT VEGETATIVE PHASE (SVP); CONTAINS InterPro DOMAIN/s: Transcription factor, MADS-box (InterPro:IPR002100), Transcription factor, K-box (InterPro:IPR002487); BEST Arabidopsis thaliana protein match is: AGAMOUS-like 24 (TAIR:AT4G24540.1)	Transcription factor, K-box | Transcription factor, MADS-box
19.5878	14.8904	AT2G22540	1	907	GTAG	GTAG	K-box region and MADS-box transcription factor family protein	SHORT VEGETATIVE PHASE (SVP); CONTAINS InterPro DOMAIN/s: Transcription factor, MADS-box (InterPro:IPR002100), Transcription factor, K-box (InterPro:IPR002487); BEST Arabidopsis thaliana protein match is: AGAMOUS-like 24 (TAIR:AT4G24540.1)	Transcription factor, K-box | Transcription factor, MADS-box
37.1638	51.4424	AT2G22660	1	241	GTAG	GTAG	Protein of unknown function (duplicated DUF1399)	Protein of unknown function (duplicated DUF1399); FUNCTIONS IN: molecular_function unknown; INVOLVED IN: biological_process unknown; LOCATED IN: plasma membrane; EXPRESSED IN: 24 plant structures; EXPRESSED DURING: 13 growth stages; CONTAINS InterPro DOMAIN/s: Protein of unknown function DUF1399 (InterPro:IPR009836); BEST Arabidopsis thaliana protein match is: Protein of unknown function (duplica…	Protein of unknown function DUF1399
15.3395	18.9101	AT2G22830	5	259	GCAG	GCAG	squalene epoxidase 2	squalene epoxidase 2 (SQE2); FUNCTIONS IN: squalene monooxygenase activity, electron carrier activity, oxidoreductase activity, FAD binding; INVOLVED IN: sterol biosynthetic process; LOCATED IN: integral to membrane; EXPRESSED IN: 22 plant structures; EXPRESSED DURING: 13 growth stages; CONTAINS InterPro DOMAIN/s: Squalene epoxidase (InterPro:IPR013698), Fumarate reductase/succinate dehydrogenase…	Aromatic-ring hydroxylase-like | FAD binding domain | Squalene epoxidase
9.33255	11.538	AT2G22980	1	82	GTAG	GTAG	serine carboxypeptidase-like 13	serine carboxypeptidase-like 13 (SCPL13); FUNCTIONS IN: serine-type carboxypeptidase activity; INVOLVED IN: proteolysis; LOCATED IN: endomembrane system; EXPRESSED IN: 23 plant structures; EXPRESSED DURING: 13 growth stages; CONTAINS InterPro DOMAIN/s: Peptidase S10, serine carboxypeptidase (InterPro:IPR001563); BEST Arabidopsis thaliana protein match is: serine carboxypeptidase-like 11 (TAIR:AT2…	Alpha/Beta hydrolase fold | Peptidase S10, serine carboxypeptidase
5.20218	5.57877	AT2G23010	1	91	GTAG	GTAG	serine carboxypeptidase-like 9	serine carboxypeptidase-like 9 (SCPL9); FUNCTIONS IN: serine-type carboxypeptidase activity; INVOLVED IN: proteolysis; LOCATED IN: endomembrane system; CONTAINS InterPro DOMAIN/s: Peptidase S10, serine carboxypeptidase (InterPro:IPR001563); BEST Arabidopsis thaliana protein match is: sinapoylglucose 1 (TAIR:AT2G22990.1)	Alpha/Beta hydrolase fold | Peptidase S10, serine carboxypeptidase
4.14013	7.19169	AT2G23030	8	102	GTAG	GTAG	SNF1-related protein kinase 2.9	SNF1-related protein kinase 2.9 (SNRK2.9); FUNCTIONS IN: protein serine/threonine kinase activity, protein kinase activity, kinase activity, ATP binding; INVOLVED IN: protein amino acid phosphorylation, response to osmotic stress; EXPRESSED IN: hypocotyl, root; CONTAINS InterPro DOMAIN/s: Protein kinase, ATP binding site (InterPro:IPR017441), Serine/threonine-protein kinase domain (InterPro:IPR00…	Protein kinase domain | Protein kinase, ATP binding site | Protein kinase-like domain | Serine/threonine-protein kinase, active site | Serine/threonine/dual specificity protein kinase, catalytic domain
22.5073	35.5319	AT2G23030	7	225	GCAG	GCAG	SNF1-related protein kinase 2.9	SNF1-related protein kinase 2.9 (SNRK2.9); FUNCTIONS IN: protein serine/threonine kinase activity, protein kinase activity, kinase activity, ATP binding; INVOLVED IN: protein amino acid phosphorylation, response to osmotic stress; EXPRESSED IN: hypocotyl, root; CONTAINS InterPro DOMAIN/s: Protein kinase, ATP binding site (InterPro:IPR017441), Serine/threonine-protein kinase domain (InterPro:IPR00…	Protein kinase domain | Protein kinase, ATP binding site | Protein kinase-like domain | Serine/threonine-protein kinase, active site | Serine/threonine/dual specificity protein kinase, catalytic domain
5.24251	5.62478	AT2G23700	7	86	GTAG	GTAG	Protein of unknown function, DUF547	Protein of unknown function, DUF547; CONTAINS InterPro DOMAIN/s: Protein of unknown function DUF547 (InterPro:IPR006869); BEST Arabidopsis thaliana protein match is: Protein of unknown function, DUF547 (TAIR:AT5G66600.2)	Domain of unknown function DUF547 | Ternary complex factor MIP1, leucine-zipper
5.58987	3.82656	AT2G24150	3	87	GTAG	GTAG	heptahelical protein 3	heptahelical protein 3 (HHP3); FUNCTIONS IN: receptor activity; INVOLVED IN: response to oxidative stress, response to hormone stimulus, response to sucrose stimulus; LOCATED IN: integral to membrane; EXPRESSED IN: 23 plant structures; EXPRESSED DURING: 13 growth stages; CONTAINS InterPro DOMAIN/s: Hly-III related (InterPro:IPR004254); BEST Arabidopsis thaliana protein match is: heptahelical tran…	Hly-III-related
15.4478	13.1308	AT2G24765	5	375	GTAG	GTAG	ADP-ribosylation factor 3	ADP-ribosylation factor 3 (ARF3); FUNCTIONS IN: protein binding; INVOLVED IN: N-terminal protein myristoylation; INVOLVED IN: response to cadmium ion, N-terminal protein myristoylation; LOCATED IN: Golgi stack, plasma membrane, membrane; EXPRESSED IN: 25 plant structures; EXPRESSED DURING: 15 growth stages; CONTAINS InterPro DOMAIN/s: ADP-ribosylation factor (InterPro:IPR006688), ARF/SAR superfam…	P-loop containing nucleoside triphosphate hydrolase | Small GTP-binding protein domain | Small GTPase superfamily, ARF type | Small GTPase superfamily, ARF/SAR type
6.27967	4.88059	AT2G25050	4	97	GTAG	GTAG	Actin-binding FH2 (Formin Homology) protein	Actin-binding FH2 (Formin Homology) protein; FUNCTIONS IN: actin binding; INVOLVED IN: cellular component organization, actin cytoskeleton organization; CONTAINS InterPro DOMAIN/s: Actin-binding FH2/DRF autoregulatory (InterPro:IPR003104), C2 calcium/lipid-binding domain, CaLB (InterPro:IPR008973), Actin-binding FH2 (InterPro:IPR015425), Tensin phosphatase, C2 domain (InterPro:IPR014020); BEST Ar…	C2 domain | Formin, FH2 domain | Protein-tyrosine phosphatase-like | Tensin phosphatase, C2 domain
2.8383	2.42877	AT2G25290	1	69	GTAG	GTAG	Octicosapeptide/Phox/Bem1p (PB1) domain-containing protein / tetratricopeptide repeat (TPR)-containing protein	Octicosapeptide/Phox/Bem1p (PB1) domain-containing protein / tetratricopeptide repeat (TPR)-containing protein; FUNCTIONS IN: binding; INVOLVED IN: biological_process unknown; LOCATED IN: cellular_component unknown; CONTAINS InterPro DOMAIN/s: Octicosapeptide/Phox/Bem1p (InterPro:IPR000270), Tetratricopeptide-like helical (InterPro:IPR011990), Tetratricopeptide repeat-containing (InterPro:IPR0130…	Phox/Bem1p | Tetratricopeptide repeat | Tetratricopeptide repeat-containing domain | Tetratricopeptide-like helical domain
8.64364	3.46642	AT2G25605	3	91	GTAG	GTAG		unknown protein; FUNCTIONS IN: molecular_function unknown; INVOLVED IN: biological_process unknown; LOCATED IN: chloroplast
18.171	33.9706	AT2G25800	3	110	GCAG	GCAG	Protein of unknown function (DUF810)	CONTAINS InterPro DOMAIN/s: Munc13 homology 1 (InterPro:IPR014770), Protein of unknown function DUF810 (InterPro:IPR008528), Mammalian uncoordinated homology 13, domain 2 (InterPro:IPR014772); BEST Arabidopsis thaliana protein match is: Protein of unknown function (DUF810) (TAIR:AT2G20010.2)	Mammalian uncoordinated homology 13, domain 2 | Munc13 homology 1 | Protein of unknown function DUF810
4.16171	3.58687	AT2G26170	4	82	GTAG	GTAG	cytochrome P450, family 711, subfamily A, polypeptide 1	cytochrome P450, family 711, subfamily A, polypeptide 1 (CYP711A1); FUNCTIONS IN: electron carrier activity, monooxygenase activity, iron ion binding, oxygen binding, heme binding; INVOLVED IN: carotenoid biosynthetic process, positive regulation of flavonoid biosynthetic process, regulation of meristem structural organization, secondary shoot formation, auxin polar transport; EXPRESSED IN: 23 pl…	Cytochrome P450 | Cytochrome P450, E-class, group I | Cytochrome P450, conserved site
2.45222	3.4164	AT2G26200	11	113	GTAG	GTAG	S-adenosyl-L-methionine-dependent methyltransferases superfamily protein	S-adenosyl-L-methionine-dependent methyltransferases superfamily protein; CONTAINS InterPro DOMAIN/s: Methyltransferase-16, putative (InterPro:IPR019410), Methyltransferase type 12 (InterPro:IPR013217); BEST Arabidopsis thaliana protein match is: Methyltransferase family protein (TAIR:AT1G54650.1)	Methyltransferase type 12 | Methyltransferase-like | Nicotinamide N-methyltransferase-like | S-adenosyl-L-methionine-dependent methyltransferase-like
4.10462	5.71276	AT2G26330	26	346	GTAG	GTAG	Leucine-rich receptor-like protein kinase family protein	ERECTA (ER); CONTAINS InterPro DOMAIN/s: Protein kinase, ATP binding site (InterPro:IPR017441), Protein kinase, catalytic domain (InterPro:IPR000719), Leucine-rich repeat-containing N-terminal domain, type 2 (InterPro:IPR013210), Leucine-rich repeat (InterPro:IPR001611), Serine/threonine-protein kinase-like domain (InterPro:IPR017442), Protein kinase-like domain (InterPro:IPR011009), Serine/threo…	Leucine-rich repeat | Leucine-rich repeat-containing N-terminal, type 2 | Protein kinase domain | Protein kinase, ATP binding site | Protein kinase-like domain | Serine/threonine-protein kinase, active site
2.44421	2.63881	AT2G26550	2	84	GTAG	GTAG	heme oxygenase 2	heme oxygenase 2 (HO2); CONTAINS InterPro DOMAIN/s: Haem oxygenase-like, multi-helical (InterPro:IPR016084), Haem oxygenase-like (InterPro:IPR016053), Haem oxygenase (decyclizing), plant (InterPro:IPR016951); BEST Arabidopsis thaliana protein match is: Plant haem oxygenase (decyclizing) family protein (TAIR:AT2G26670.1)	Haem oxygenase (decyclizing), plant | Haem oxygenase-like | Haem oxygenase-like, multi-helical
2.54185	2.91332	AT2G26780	32	74	GTAG	GTAG	ARM repeat superfamily protein	ARM repeat superfamily protein; FUNCTIONS IN: binding; INVOLVED IN: biological_process unknown; LOCATED IN: membrane; EXPRESSED IN: 22 plant structures; EXPRESSED DURING: 13 growth stages; CONTAINS InterPro DOMAIN/s: Armadillo-like helical (InterPro:IPR011989), Armadillo-type fold (InterPro:IPR016024)	Armadillo-like helical | Armadillo-type fold | Proteasome component ECM29/Translational activator GCN1 | Proteasome stabiliser ECM29
3.24228	2.63759	AT2G26800	3	446	GTAG	GTAG	Aldolase superfamily protein	Aldolase superfamily protein; FUNCTIONS IN: hydroxymethylglutaryl-CoA lyase activity, catalytic activity; INVOLVED IN: leucine metabolic process, metabolic process; LOCATED IN: mitochondrion; EXPRESSED IN: 25 plant structures; EXPRESSED DURING: 15 growth stages; CONTAINS InterPro DOMAIN/s: Aldolase-type TIM barrel (InterPro:IPR013785), Pyruvate carboxyltransferase (InterPro:IPR000891); BEST Arabi…	Aldolase-type TIM barrel | Hydroxymethylglutaryl-CoA lyase | Pyruvate carboxyltransferase
2.97961	2.68943	AT2G26830	5	142	GTAG	GTAG	Protein kinase superfamily protein	embryo defective 1187 (emb1187); CONTAINS InterPro DOMAIN/s: Choline/ethanolamine kinase (InterPro:IPR002573), Protein kinase-like domain (InterPro:IPR011009); BEST Arabidopsis thaliana protein match is: Protein kinase superfamily protein (TAIR:AT4G09760.1)	Protein kinase-like domain
20.2477	19.12	AT2G27150	8	95	GTAG	GTAG	abscisic aldehyde oxidase 3	abscisic aldehyde oxidase 3 (AAO3); CONTAINS InterPro DOMAIN/s: Aldehyde oxidase/xanthine dehydrogenase (InterPro:IPR016208), Ferredoxin (InterPro:IPR001041), Molybdopterin dehydrogenase, FAD-binding (InterPro:IPR002346), [2Fe-2S]-binding (InterPro:IPR002888), FAD-binding, type 2 (InterPro:IPR016166), CO dehydrogenase flavoprotein, C-terminal (InterPro:IPR005107), 2Fe-2S ferredoxin, iron-sulphur …	2Fe-2S ferredoxin, iron-sulphur binding site | 2Fe-2S ferredoxin-type domain | Aldehyde oxidase/xanthine dehydrogenase | Aldehyde oxidase/xanthine dehydrogenase, a/b hammerhead | Aldehyde oxidase/xanthine dehydrogenase, molybdopterin binding | Beta-grasp domain | CO dehydrogenase flavoprotein, C-terminal | CO dehydrogenase flavoprotein-like, FAD-binding, subdomain 2 | FAD-binding, type 2 | Molybd…
7.67972	6.01584	AT2G27290	1	88	GTAG	GTAG	Protein of unknown function (DUF1279)	Protein of unknown function (DUF1279); FUNCTIONS IN: molecular_function unknown; INVOLVED IN: biological_process unknown; LOCATED IN: chloroplast thylakoid membrane, chloroplast; EXPRESSED IN: 22 plant structures; EXPRESSED DURING: 13 growth stages; CONTAINS InterPro DOMAIN/s: Protein of unknown function DUF1279 (InterPro:IPR009688)	Domain of unknown function DUF1279
3.95578	4.62255	AT2G27490	3	869	GTAG	GTAG	dephospho-CoA kinase family	ATCOAE; FUNCTIONS IN: ATP binding, dephospho-CoA kinase activity; INVOLVED IN: coenzyme A biosynthetic process; LOCATED IN: peroxisome, chloroplast, vacuole; EXPRESSED IN: 25 plant structures; EXPRESSED DURING: 15 growth stages; CONTAINS InterPro DOMAIN/s: Dephospho-CoA kinase (InterPro:IPR001977)	Dephospho-CoA kinase | P-loop containing nucleoside triphosphate hydrolase
11.9043	9.02865	AT2G28290	27	305	GTAG	GTAG	P-loop containing nucleoside triphosphate hydrolases superfamily protein	SPLAYED (SYD); CONTAINS InterPro DOMAIN/s: DEAD-like helicase, N-terminal (InterPro:IPR014001), DNA/RNA helicase, C-terminal (InterPro:IPR001650), Helicase/SANT-associated, DNA binding (InterPro:IPR014012), Helicase, superfamily 1/2, ATP-binding domain (InterPro:IPR014021), SNF2-related (InterPro:IPR000330); BEST Arabidopsis thaliana protein match is: Homeotic gene regulator (TAIR:AT3G06010.1)	Glutamine-Leucine-Glutamine, QLQ | Helicase, C-terminal | Helicase, superfamily 1/2, ATP-binding domain | Helicase/SANT-associated, DNA binding | P-loop containing nucleoside triphosphate hydrolase | SNF2-related | Snf2 ATP coupling domain
74.8675	46.7008	AT2G28320	7	94	GTAG	GTAG	Pleckstrin homology (PH) and lipid-binding START domains-containing protein	Pleckstrin homology (PH) and lipid-binding START domains-containing protein; FUNCTIONS IN: phosphoinositide binding; INVOLVED IN: signal transduction; LOCATED IN: plasma membrane; EXPRESSED IN: 24 plant structures; EXPRESSED DURING: 15 growth stages; CONTAINS InterPro DOMAIN/s: Protein of unknown function DUF1336 (InterPro:IPR009769), Pleckstrin homology-type (InterPro:IPR011993), Lipid-binding S…	Domain of unknown function DUF1336 | Pleckstrin homology domain | Pleckstrin homology-like domain | START domain | START-like domain
17.4524	35.0752	AT2G28390	6	78	GCAG	GCAG	SAND family protein	SAND family protein; LOCATED IN: chloroplast; EXPRESSED IN: 25 plant structures; EXPRESSED DURING: 14 growth stages; CONTAINS InterPro DOMAIN/s: Vacuolar fusion protein MON1 (InterPro:IPR004353)	Vacuolar fusion protein MON1
3.14414	3.55384	AT2G28605	1	80	GTAG	GTAG	Photosystem II reaction center PsbP family protein	Photosystem II reaction center PsbP family protein; FUNCTIONS IN: calcium ion binding; INVOLVED IN: photosynthesis; LOCATED IN: thylakoid, chloroplast; EXPRESSED IN: 21 plant structures; EXPRESSED DURING: 13 growth stages; CONTAINS InterPro DOMAIN/s: Photosystem II oxygen evolving complex protein PsbP (InterPro:IPR002683), Mog1/PsbP/DUF1795, alpha/beta/alpha sandwich (InterPro:IPR016124), Mog1/Ps…	Mog1/PsbP, alpha/beta/alpha sandwich | Photosystem II PsbP, oxygen evolving complex
5.72394	5.126	AT2G28660	1	397	GTAG	GTAG	Chloroplast-targeted copper chaperone protein	Chloroplast-targeted copper chaperone protein; FUNCTIONS IN: copper ion binding, metal ion binding; INVOLVED IN: copper ion transport, metal ion transport; LOCATED IN: chloroplast; EXPRESSED IN: 21 plant structures; EXPRESSED DURING: 13 growth stages; CONTAINS InterPro DOMAIN/s: Heavy metal transport/detoxification protein (InterPro:IPR006121), Copper chaperone, chloroplast-targeted, predicted (I…	Copper chaperone, chloroplast-targeted, predicted | Heavy metal-associated domain, HMA
3.01856	2.26785	AT2G28940	3	281	GCAG	GCAG	Protein kinase superfamily protein	Protein kinase superfamily protein; FUNCTIONS IN: protein kinase activity, kinase activity, ATP binding; INVOLVED IN: protein amino acid phosphorylation; EXPRESSED IN: 19 plant structures; LOCATED IN: endomembrane system; EXPRESSED DURING: 13 growth stages; CONTAINS InterPro DOMAIN/s: Protein kinase, ATP binding site (InterPro:IPR017441), Protein kinase, catalytic domain (InterPro:IPR000719), Ser…	Concanavalin A-like lectin/glucanase, subgroup | Protein kinase domain | Protein kinase, ATP binding site | Protein kinase-like domain
4.66509	5.0266	AT2G29080	1	101	GTAG	GTAG	FTSH protease 3	FTSH protease 3 (ftsh3); FUNCTIONS IN: ATP-dependent peptidase activity, ATPase activity; INVOLVED IN: proteolysis, protein catabolic process; LOCATED IN: mitochondrion, chloroplast thylakoid membrane; EXPRESSED IN: 24 plant structures; EXPRESSED DURING: 13 growth stages; CONTAINS InterPro DOMAIN/s: Peptidase M41, FtsH (InterPro:IPR005936), ATPase, AAA+ type, core (InterPro:IPR003593), ATPase, AA…	AAA+ ATPase domain | ATPase, AAA-type, conserved site | ATPase, AAA-type, core | P-loop containing nucleoside triphosphate hydrolase | Peptidase M41 | Peptidase M41, FtsH extracellular | Peptidase, FtsH
10.9795	6.61455	AT2G29210	1	119	GTAG	GTAG	splicing factor PWI domain-containing protein	splicing factor PWI domain-containing protein; INVOLVED IN: RNA splicing; EXPRESSED IN: 23 plant structures; EXPRESSED DURING: 13 growth stages; CONTAINS InterPro DOMAIN/s: Splicing factor PWI (InterPro:IPR002483); BEST Arabidopsis thaliana protein match is: Polynucleotidyl transferase, ribonuclease H-like superfamily protein (TAIR:AT3G12440.1)	PWI domain
3.83918	2.3989	AT2G29320	1	101	GTAG	GTAG	NAD(P)-binding Rossmann-fold superfamily protein	NAD(P)-binding Rossmann-fold superfamily protein; FUNCTIONS IN: oxidoreductase activity, binding, catalytic activity; INVOLVED IN: oxidation reduction, metabolic process; LOCATED IN: cellular_component unknown; EXPRESSED IN: 21 plant structures; EXPRESSED DURING: 13 growth stages; CONTAINS InterPro DOMAIN/s: NAD(P)-binding domain (InterPro:IPR016040), Glucose/ribitol dehydrogenase (InterPro:IPR00…	Glucose/ribitol dehydrogenase | NAD(P)-binding domain | Short-chain dehydrogenase/reductase SDR
6.83627	3.52128	AT2G29360	1	202	GTAG	GTAG	NAD(P)-binding Rossmann-fold superfamily protein	NAD(P)-binding Rossmann-fold superfamily protein; FUNCTIONS IN: oxidoreductase activity, binding, catalytic activity; INVOLVED IN: oxidation reduction, metabolic process; LOCATED IN: cellular_component unknown; EXPRESSED IN: 22 plant structures; EXPRESSED DURING: 14 growth stages; CONTAINS InterPro DOMAIN/s: Short-chain dehydrogenase/reductase, conserved site (InterPro:IPR020904), NAD(P)-binding …	Glucose/ribitol dehydrogenase | NAD(P)-binding domain | Short-chain dehydrogenase/reductase SDR | Short-chain dehydrogenase/reductase, conserved site
5.59142	7.09609	AT2G30280	9	376	GTAG	GTAG	RNA-directed DNA methylation 4	RNA-directed DNA methylation 4 (RDM4); CONTAINS InterPro DOMAIN/s: Protein of unknown function DUF1762 (InterPro:IPR013883)	Transcription factor Iwr1
17.5051	19.8347	AT2G30470	4	94	GTAG	GTAG	high-level expression of sugar-inducible gene 2	high-level expression of sugar-inducible gene 2 (HSI2); CONTAINS InterPro DOMAIN/s: Transcriptional factor B3 (InterPro:IPR003340), Zinc finger, CW-type (InterPro:IPR011124); BEST Arabidopsis thaliana protein match is: HSI2-like 1 (TAIR:AT4G32010.1)	B3 DNA binding domain | DNA-binding pseudobarrel domain | Zinc finger, CW-type
26.9906	6.61374	AT2G30970	1	209	GTAG	GTAG	aspartate aminotransferase 1	aspartate aminotransferase 1 (ASP1); FUNCTIONS IN: L-aspartate:2-oxoglutarate aminotransferase activity, copper ion binding; INVOLVED IN: response to cadmium ion; LOCATED IN: mitochondrion; EXPRESSED IN: 23 plant structures; EXPRESSED DURING: 13 growth stages; EXPRESSED IN: 25 plant structures; CONTAINS InterPro DOMAIN/s: Aminotransferase, class I/classII (InterPro:IPR004839), Pyridoxal phosphate…	Aminotransferase, class I/classII | Aminotransferases, class-I, pyridoxal-phosphate-binding site | Aspartate/other aminotransferase | Pyridoxal phosphate-dependent transferase | Pyridoxal phosphate-dependent transferase, major region, subdomain 1
6.4556	3.30799	AT2G31450	10	83	GTAG	GTAG	DNA glycosylase superfamily protein	ATNTH1; CONTAINS InterPro DOMAIN/s: Helix-hairpin-helix motif (InterPro:IPR000445), Helix-hairpin-helix DNA-binding motif, class 1 (InterPro:IPR003583), Endonuclease III, iron-sulphur binding site (InterPro:IPR004035), DNA glycosylase (InterPro:IPR011257), Endonuclease III-like, iron-sulphur cluster loop motif (InterPro:IPR003651), Endonuclease III, conserved site-2 (InterPro:IPR004036), HhH-GPD …	DNA glycosylase | Endonuclease III, iron-sulphur binding site | Endonuclease III-like, conserved site-2 | Endonuclease III-like, iron-sulphur cluster loop motif | Helix-hairpin-helix DNA-binding motif, class 1 | Helix-hairpin-helix motif | Helix-turn-helix, base-excision DNA repair, C-terminal | HhH-GPD domain
4.5902	3.17952	AT2G31510	4	314	GTAG	GTAG	IBR domain-containing protein	ARIADNE 7 (ARI7); FUNCTIONS IN: zinc ion binding, nucleic acid binding; EXPRESSED IN: 23 plant structures; EXPRESSED DURING: 14 growth stages; CONTAINS InterPro DOMAIN/s: Zinc finger, C6HC-type (InterPro:IPR002867), Zinc finger, RING-type (InterPro:IPR001841), Zinc finger, CCHC-type (InterPro:IPR001878); BEST Arabidopsis thaliana protein match is: RING/U-box superfamily protein (TAIR:AT1G05890.1)	Zinc finger, C6HC-type | Zinc finger, CCHC-type | Zinc finger, RING-type | Zinc finger, RING/FYVE/PHD-type
1086.39	199.278	AT2G31650	22	101	GCAG	GCAG	homologue of trithorax	homologue of trithorax (ATX1); CONTAINS InterPro DOMAIN/s: SET domain (InterPro:IPR001214), Zinc finger, PHD-type, conserved site (InterPro:IPR019786), Zinc finger, PHD-type (InterPro:IPR001965), FY-rich, C-terminal (InterPro:IPR003889), Post-SET domain (InterPro:IPR003616), FY-rich, N-terminal (InterPro:IPR003888), Protein kinase C-like, phorbol ester/diacylglycerol binding (InterPro:IPR002219),…	FY-rich, C-terminal | FY-rich, N-terminal | Lamin-B receptor of TUDOR domain | PWWP domain | Post-SET domain | Protein kinase C-like, phorbol ester/diacylglycerol-binding domain | SET domain | Zinc finger, FYVE/PHD-type | Zinc finger, PHD-finger | Zinc finger, PHD-type | Zinc finger, PHD-type, conserved site | Zinc finger, RING/FYVE/PHD-type
3.49904	7.14119	AT2G31800	9	95	GCAG	GCAG	Integrin-linked protein kinase family	Integrin-linked protein kinase family; FUNCTIONS IN: protein serine/threonine/tyrosine kinase activity, kinase activity; INVOLVED IN: regulation of signal transduction, protein amino acid phosphorylation; EXPRESSED IN: 24 plant structures; EXPRESSED DURING: 15 growth stages; CONTAINS InterPro DOMAIN/s: Integrin-linked protein kinase (InterPro:IPR016253), Serine-threonine/tyrosine-protein kinase (…	Ankyrin repeat | Ankyrin repeat-containing domain | Integrin-linked protein kinase | Protein kinase domain | Protein kinase-like domain | Serine-threonine/tyrosine-protein kinase catalytic domain | Serine/threonine-protein kinase, active site
9.50338	11.6771	AT2G31800	6	88	GCAG	GCAG	Integrin-linked protein kinase family	Integrin-linked protein kinase family; FUNCTIONS IN: protein serine/threonine/tyrosine kinase activity, kinase activity; INVOLVED IN: regulation of signal transduction, protein amino acid phosphorylation; EXPRESSED IN: 24 plant structures; EXPRESSED DURING: 15 growth stages; CONTAINS InterPro DOMAIN/s: Integrin-linked protein kinase (InterPro:IPR016253), Serine-threonine/tyrosine-protein kinase (…	Ankyrin repeat | Ankyrin repeat-containing domain | Integrin-linked protein kinase | Protein kinase domain | Protein kinase-like domain | Serine-threonine/tyrosine-protein kinase catalytic domain | Serine/threonine-protein kinase, active site
3.86963	2.56061	AT2G32090	2	198	GTAG	GTAG	Lactoylglutathione lyase / glyoxalase I family protein	Lactoylglutathione lyase / glyoxalase I family protein; BEST Arabidopsis thaliana protein match is: Lactoylglutathione lyase / glyoxalase I family protein (TAIR:AT2G28420.1); CONTAINS InterPro DOMAIN/s: Glyoxalase/bleomycin resistance protein/dioxygenase (InterPro:IPR004360)	Glyoxalase-like domain | Glyoxalase/Bleomycin resistance protein/Dihydroxybiphenyl dioxygenase
13.374	18.0872	AT2G32230	4	91	GTAG	GTAG	proteinaceous RNase P 1	proteinaceous RNase P 1 (PRORP1); CONTAINS InterPro DOMAIN/s: Multi antimicrobial extrusion protein MatE (InterPro:IPR002528), Pentatricopeptide repeat (InterPro:IPR002885); BEST Arabidopsis thaliana protein match is: proteinaceous RNase P 3 (TAIR:AT4G21900.1)	Pentatricopeptide repeat
23.2262	9.89272	AT2G32500	7	164	GTAG	GTAG	Stress responsive alpha-beta barrel domain protein	Stress responsive alpha-beta barrel domain protein; CONTAINS InterPro DOMAIN/s: Stress responsive alpha-beta barrel (InterPro:IPR013097), Dimeric alpha-beta barrel (InterPro:IPR011008); BEST Arabidopsis thaliana protein match is: Stress responsive alpha-beta barrel domain protein (TAIR:AT2G31670.1)	Dimeric alpha-beta barrel | Stress responsive alpha-beta barrel
10.051	12.6884	AT2G32870	5	97	GTAG	GTAG	TRAF-like family protein	TRAF-like family protein; FUNCTIONS IN: molecular_function unknown; INVOLVED IN: biological_process unknown; LOCATED IN: cellular_component unknown; EXPRESSED IN: cotyledon; CONTAINS InterPro DOMAIN/s: TRAF-like (InterPro:IPR008974), MATH (InterPro:IPR002083), TRAF-type (InterPro:IPR013322); BEST Arabidopsis thaliana protein match is: TRAF-like family protein (TAIR:AT2G32880.1)	MATH | TRAF-like
47.2044	44.2867	AT2G32900	7	132	GTAG	GTAG	centromere/kinetochore protein, putative (ZW10)	ATZW10; INVOLVED IN: chromosome segregation; LOCATED IN: chromosome, centromeric region, nucleus; EXPRESSED IN: 23 plant structures; EXPRESSED DURING: 14 growth stages; CONTAINS InterPro DOMAIN/s: Centromere/kinetochore protein Zw10 (InterPro:IPR009361)	RZZ complex, subunit Zw10
40.3774	43.6218	AT2G32950	4	570	GTAG	GTAG	Transducin/WD40 repeat-like superfamily protein	CONSTITUTIVE PHOTOMORPHOGENIC 1 (COP1); CONTAINS InterPro DOMAIN/s: WD40 repeat 2 (InterPro:IPR019782), Zinc finger, RING-type, conserved site (InterPro:IPR017907), Zinc finger, RING-type (InterPro:IPR001841), WD40 repeat, conserved site (InterPro:IPR019775), WD40 repeat (InterPro:IPR001680), WD40 repeat-like-containing domain (InterPro:IPR011046), WD40-repeat-containing domain (InterPro:IPR01798…	WD40 repeat | WD40 repeat, conserved site | WD40-repeat-containing domain | WD40/YVTN repeat-like-containing domain | Zinc finger, RING-type | Zinc finger, RING-type, conserved site | Zinc finger, RING/FYVE/PHD-type
51.511	43.231	AT2G33435	1	689	GTAG	GTAG	RNA-binding (RRM/RBD/RNP motifs) family protein	RNA-binding (RRM/RBD/RNP motifs) family protein; FUNCTIONS IN: RNA binding, nucleotide binding, nucleic acid binding; INVOLVED IN: biological_process unknown; LOCATED IN: cellular_component unknown; CONTAINS InterPro DOMAIN/s: RNA recognition motif, RNP-1 (InterPro:IPR000504), Nucleotide-binding, alpha-beta plait (InterPro:IPR012677); BEST Arabidopsis thaliana protein match is: U2 snRNP auxilliar…	Nucleotide-binding, alpha-beta plait | RNA recognition motif domain
4.47718	6.57841	AT2G33793	2	898	GTAG	GTAG		unknown protein
7.42732	4.66312	AT2G33830	2	106	GTAG	GTAG	Dormancy/auxin associated family protein	Dormancy/auxin associated family protein; CONTAINS InterPro DOMAIN/s: Dormancyauxin associated (InterPro:IPR008406); BEST Arabidopsis thaliana protein match is: dormancy-associated protein-like 1 (TAIR:AT1G28330.1)	Dormancyauxin associated
4.21878	5.17383	AT2G34060	1	393	GTAG	GTAG	Peroxidase superfamily protein	Peroxidase superfamily protein; FUNCTIONS IN: peroxidase activity, heme binding; INVOLVED IN: response to oxidative stress, oxidation reduction; LOCATED IN: endomembrane system; EXPRESSED IN: root, flower; EXPRESSED DURING: petal differentiation and expansion stage; CONTAINS InterPro DOMAIN/s: Haem peroxidase (InterPro:IPR010255), Plant peroxidase (InterPro:IPR000823), Peroxidases heam-ligand bin…	Haem peroxidase | Haem peroxidase, plant/fungal/bacterial | Peroxidase, active site | Peroxidases heam-ligand binding site | Plant peroxidase
3.27206	3.49089	AT2G34200	3	109	GTAG	GTAG	RING/FYVE/PHD zinc finger superfamily protein	RING/FYVE/PHD zinc finger superfamily protein; FUNCTIONS IN: zinc ion binding; LOCATED IN: membrane; EXPRESSED IN: 22 plant structures; EXPRESSED DURING: 12 growth stages; CONTAINS InterPro DOMAIN/s: Zinc finger, C3HC4 RING-type (InterPro:IPR018957), Zinc finger, RING-CH-type (InterPro:IPR011016); BEST Arabidopsis thaliana protein match is: RING/FYVE/PHD zinc finger superfamily protein (TAIR:AT5G…	Zinc finger, RING-CH-type | Zinc finger, RING/FYVE/PHD-type
3.28871	5.44592	AT2G34510	2	1314	GTAG	GTAG	Protein of unknown function, DUF642	FUNCTIONS IN: molecular_function unknown; INVOLVED IN: biological_process unknown; LOCATED IN: anchored to membrane; EXPRESSED IN: 20 plant structures; EXPRESSED DURING: 14 growth stages; CONTAINS InterPro DOMAIN/s: Protein of unknown function DUF642 (InterPro:IPR006946), Galactose-binding domain-like (InterPro:IPR008979); BEST Arabidopsis thaliana protein match is: Protein of unknown function, D…	Galactose-binding domain-like | Protein of unknown function DUF642
23.8709	20.8786	AT2G34630	2	230	GTAG	GTAG	geranyl diphosphate synthase 1	geranyl diphosphate synthase 1 (GPS1); CONTAINS InterPro DOMAIN/s: Polyprenyl synthetase-related (InterPro:IPR017446), Terpenoid synthase (InterPro:IPR008949), Polyprenyl synthetase (InterPro:IPR000092); BEST Arabidopsis thaliana protein match is: solanesyl diphosphate synthase 2 (TAIR:AT1G17050.1)	Polyprenyl synthetase | Polyprenyl synthetase-related | Terpenoid synthase
21.9378	7.09695	AT2G35040	2	89	GTAG	GTAG	AICARFT/IMPCHase bienzyme family protein	AICARFT/IMPCHase bienzyme family protein; FUNCTIONS IN: phosphoribosylaminoimidazolecarboxamide formyltransferase activity, IMP cyclohydrolase activity, catalytic activity; INVOLVED IN: response to cold, purine nucleotide biosynthetic process; LOCATED IN: stromule; LOCATED IN: stromule, chloroplast, chloroplast stroma; EXPRESSED IN: 23 plant structures; EXPRESSED DURING: 13 growth stages; EXPRESS…	AICAR transformylase domain | AICARFT/IMPCHase bienzyme | Cytidine deaminase-like | Methylglyoxal synthase-like domain
4.45432	7.37606	AT2G35155	4	95	GTAG	GTAG	Trypsin family protein	Trypsin family protein; FUNCTIONS IN: catalytic activity; INVOLVED IN: biological_process unknown; LOCATED IN: cellular_component unknown; EXPRESSED IN: 22 plant structures; EXPRESSED DURING: 13 growth stages; CONTAINS InterPro DOMAIN/s: Serine/cysteine peptidase, trypsin-like (InterPro:IPR009003); BEST Arabidopsis thaliana protein match is: Trypsin family protein (TAIR:AT5G45030.2)	Peptidase S64, Ssy5 | Trypsin-like cysteine/serine peptidase domain
5.14414	4.54767	AT2G35450	6	85	GTAG	GTAG	catalytics;hydrolases	catalytics;hydrolases; FUNCTIONS IN: hydrolase activity, catalytic activity; INVOLVED IN: metabolic process; LOCATED IN: chloroplast; EXPRESSED IN: 23 plant structures; EXPRESSED DURING: 13 growth stages; CONTAINS InterPro DOMAIN/s: Amidohydrolase 2 (InterPro:IPR006992)	Amidohydrolase 2
4.9943	3.65914	AT2G35490	1	187	GTAG	GTAG	Plastid-lipid associated protein PAP / fibrillin family protein	Plastid-lipid associated protein PAP / fibrillin family protein; FUNCTIONS IN: structural molecule activity; INVOLVED IN: biological_process unknown; LOCATED IN: thylakoid, chloroplast thylakoid membrane, chloroplast, plastoglobule; EXPRESSED IN: 24 plant structures; EXPRESSED DURING: 13 growth stages; CONTAINS InterPro DOMAIN/s: Plastid lipid-associated protein/fibrillin (InterPro:IPR006843); BE…	Plastid lipid-associated protein/fibrillin conserved domain
40.278	-1	AT2G35630	21	76	GTAG	GTAG	ARM repeat superfamily protein	MICROTUBULE ORGANIZATION 1 (MOR1); CONTAINS InterPro DOMAIN/s: HEAT, type 2 (InterPro:IPR021133), Armadillo-type fold (InterPro:IPR016024); BEST Arabidopsis thaliana protein match is: unknown protein (TAIR:AT3G28155.1)	Armadillo-like helical | Armadillo-type fold | CLASP N-terminal domain | HEAT, type 2
3.28406	6.54381	AT2G35660	1	85	GTAG	GTAG	FAD/NAD(P)-binding oxidoreductase family protein	CTF2A; FUNCTIONS IN: monooxygenase activity; INVOLVED IN: oxidation reduction; CONTAINS InterPro DOMAIN/s: Monooxygenase, FAD-binding (InterPro:IPR002938); BEST Arabidopsis thaliana protein match is: FAD/NAD(P)-binding oxidoreductase family protein (TAIR:AT2G29720.1)	Aromatic-ring hydroxylase-like | Monooxygenase, FAD-binding
10.3745	-1	AT2G35770	4	86	GTAG	GTAG	serine carboxypeptidase-like 28	serine carboxypeptidase-like 28 (scpl28); FUNCTIONS IN: serine-type carboxypeptidase activity; INVOLVED IN: proteolysis; LOCATED IN: endomembrane system; EXPRESSED IN: hypocotyl, root; CONTAINS InterPro DOMAIN/s: Peptidase S10, serine carboxypeptidase (InterPro:IPR001563), Peptidase S10, serine carboxypeptidase, active site (InterPro:IPR018202); BEST Arabidopsis thaliana protein match is: serine …	Alpha/Beta hydrolase fold | Peptidase S10, serine carboxypeptidase | Peptidase S10, serine carboxypeptidase, active site
7.5703	12.6228	AT2G35780	4	452	GTAG	GTAG	serine carboxypeptidase-like 26	serine carboxypeptidase-like 26 (scpl26); FUNCTIONS IN: serine-type carboxypeptidase activity; INVOLVED IN: proteolysis; LOCATED IN: vacuole; EXPRESSED IN: 22 plant structures; EXPRESSED DURING: 13 growth stages; CONTAINS InterPro DOMAIN/s: Peptidase S10, serine carboxypeptidase (InterPro:IPR001563), Peptidase S10, serine carboxypeptidase, active site (InterPro:IPR018202); BEST Arabidopsis thalia…	Alpha/Beta hydrolase fold | Peptidase S10, serine carboxypeptidase | Peptidase S10, serine carboxypeptidase, active site
11.2219	9.26691	AT2G35780	3	85	GTAG	GTAG	serine carboxypeptidase-like 26	serine carboxypeptidase-like 26 (scpl26); FUNCTIONS IN: serine-type carboxypeptidase activity; INVOLVED IN: proteolysis; LOCATED IN: vacuole; EXPRESSED IN: 22 plant structures; EXPRESSED DURING: 13 growth stages; CONTAINS InterPro DOMAIN/s: Peptidase S10, serine carboxypeptidase (InterPro:IPR001563), Peptidase S10, serine carboxypeptidase, active site (InterPro:IPR018202); BEST Arabidopsis thalia…	Alpha/Beta hydrolase fold | Peptidase S10, serine carboxypeptidase | Peptidase S10, serine carboxypeptidase, active site
5.47106	4.48697	AT2G36330	2	431	GCAG	GCAG	Uncharacterised protein family (UPF0497)	Uncharacterised protein family (UPF0497); FUNCTIONS IN: molecular_function unknown; LOCATED IN: plasma membrane, membrane; EXPRESSED IN: 22 plant structures; EXPRESSED DURING: 13 growth stages; CONTAINS InterPro DOMAIN/s: Uncharacterised protein family UPF0497, trans-membrane plant (InterPro:IPR006702); BEST Arabidopsis thaliana protein match is: Uncharacterised protein family (UPF0497) (TAIR:AT5…	Uncharacterised protein family UPF0497, trans-membrane plant
29.5048	24.2598	AT2G36380	9	84	GTAG	GTAG	pleiotropic drug resistance 6	pleiotropic drug resistance 6 (PDR6); FUNCTIONS IN: ATPase activity, coupled to transmembrane movement of substances; LOCATED IN: plasma membrane; EXPRESSED IN: 24 plant structures; EXPRESSED DURING: 13 growth stages; CONTAINS InterPro DOMAIN/s: ATPase, AAA+ type, core (InterPro:IPR003593), ABC transporter-like (InterPro:IPR003439), Plant PDR ABC transporter associated (InterPro:IPR013581), ABC-2…	AAA+ ATPase domain | ABC transporter-like | ABC-2 type transporter | ABC-transporter extracellular N-terminal domain | P-loop containing nucleoside triphosphate hydrolase | Plant PDR ABC transporter associated
2.94607	3.90886	AT2G36390	4	156	GTAG	GTAG	starch branching enzyme 2.1	starch branching enzyme 2.1 (SBE2.1); FUNCTIONS IN: 1,4-alpha-glucan branching enzyme activity; INVOLVED IN: amylopectin biosynthetic process, starch metabolic process; LOCATED IN: chloroplast stroma, chloroplast; EXPRESSED IN: 25 plant structures; EXPRESSED DURING: 15 growth stages; CONTAINS InterPro DOMAIN/s: Glycoside hydrolase, family 13, N-terminal (InterPro:IPR004193), Immunoglobulin E-set …	1,4-alpha-glucan-branching enzyme, GlgB | Alpha-amylase, C-terminal all beta | Glycoside hydrolase, catalytic domain | Glycoside hydrolase, family 13 | Glycoside hydrolase, family 13, N-terminal | Glycoside hydrolase, superfamily | Glycosyl hydrolase, family 13, all-beta | Glycosyl hydrolase, family 13, catalytic domain | Immunoglobulin E-set | Immunoglobulin-like fold
13.9789	8.9914	AT2G36630	4	83	GCAG	GCAG	Sulfite exporter TauE/SafE family protein	Sulfite exporter TauE/SafE family protein; INVOLVED IN: N-terminal protein myristoylation; LOCATED IN: endomembrane system, integral to membrane; EXPRESSED IN: 22 plant structures; EXPRESSED DURING: 15 growth stages; CONTAINS InterPro DOMAIN/s: Protein of unknown function DUF81 (InterPro:IPR002781); BEST Arabidopsis thaliana protein match is: Sulfite exporter TauE/SafE family protein (TAIR:AT2G25…	Transmembrane protein TauE like
3.35817	4.25006	AT2G36895	3	75	GTAG	GTAG		unknown protein; FUNCTIONS IN: molecular_function unknown; INVOLVED IN: biological_process unknown; LOCATED IN: chloroplast
3.08087	6.53361	AT2G37130	4	128	GTTA	GTTA	Peroxidase superfamily protein	Peroxidase superfamily protein; FUNCTIONS IN: peroxidase activity, heme binding; INVOLVED IN: defense response to fungus; EXPRESSED IN: 15 plant structures; LOCATED IN: endomembrane system; EXPRESSED DURING: 7 growth stages; CONTAINS InterPro DOMAIN/s: Haem peroxidase (InterPro:IPR010255), Plant peroxidase (InterPro:IPR000823), Haem peroxidase, plant/fungal/bacterial (InterPro:IPR002016); BEST Ar…	Haem peroxidase | Haem peroxidase, plant/fungal/bacterial | Plant peroxidase
6.60642	4.67875	AT2G37160	4	441	GCAG	GCAG	Transducin/WD40 repeat-like superfamily protein	Transducin/WD40 repeat-like superfamily protein; CONTAINS InterPro DOMAIN/s: WD40 repeat 2 (InterPro:IPR019782), WD40 repeat-like-containing domain (InterPro:IPR011046), WD40-repeat-containing domain (InterPro:IPR017986), WD40 repeat (InterPro:IPR001680), WD40/YVTN repeat-like-containing domain (InterPro:IPR015943), WD40 repeat, subgroup (InterPro:IPR019781); CONTAINS InterPro DOMAIN/s: WD40 repe…	WD40 repeat | WD40-repeat-containing domain | WD40/YVTN repeat-like-containing domain
6.18341	5.62149	AT2G37500	11	88	GTAG	GTAG	arginine biosynthesis protein ArgJ family	arginine biosynthesis protein ArgJ family; FUNCTIONS IN: glutamate N-acetyltransferase activity; INVOLVED IN: arginine biosynthetic process; LOCATED IN: chloroplast; EXPRESSED IN: 22 plant structures; EXPRESSED DURING: 13 growth stages; CONTAINS InterPro DOMAIN/s: Arginine biosynthesis protein ArgJ (InterPro:IPR002813), Peptidase S58 DmpA/arginine biosynthesis protein ArgJ (InterPro:IPR016117)	ArgJ-like domain | Arginine biosynthesis protein ArgJ
5.66839	14.4722	AT2G37520	2	86	GTAG	GTAG	Acyl-CoA N-acyltransferase with RING/FYVE/PHD-type zinc finger domain	Acyl-CoA N-acyltransferase with RING/FYVE/PHD-type zinc finger domain; FUNCTIONS IN: DNA binding, zinc ion binding; INVOLVED IN: regulation of transcription, DNA-dependent; LOCATED IN: nucleus; EXPRESSED IN: 23 plant structures; EXPRESSED DURING: 15 growth stages; CONTAINS InterPro DOMAIN/s: Zinc finger, PHD-type, conserved site (InterPro:IPR019786), Zinc finger, PHD-type (InterPro:IPR001965), Zi…	Acyl-CoA N-acyltransferase | Zinc finger, FYVE/PHD-type | Zinc finger, PHD-finger | Zinc finger, PHD-type | Zinc finger, PHD-type, conserved site | Zinc finger, RING/FYVE/PHD-type
21.3182	5.31075	AT2G37520	18	81	GTAG	GTAG	Acyl-CoA N-acyltransferase with RING/FYVE/PHD-type zinc finger domain	Acyl-CoA N-acyltransferase with RING/FYVE/PHD-type zinc finger domain; FUNCTIONS IN: DNA binding, zinc ion binding; INVOLVED IN: regulation of transcription, DNA-dependent; LOCATED IN: nucleus; EXPRESSED IN: 23 plant structures; EXPRESSED DURING: 15 growth stages; CONTAINS InterPro DOMAIN/s: Zinc finger, PHD-type, conserved site (InterPro:IPR019786), Zinc finger, PHD-type (InterPro:IPR001965), Zi…	Acyl-CoA N-acyltransferase | Zinc finger, FYVE/PHD-type | Zinc finger, PHD-finger | Zinc finger, PHD-type | Zinc finger, PHD-type, conserved site | Zinc finger, RING/FYVE/PHD-type
3.67435	6.40486	AT2G37640	2	160	GTAG	GTAG	Barwin-like endoglucanases superfamily protein	EXP3; INVOLVED IN: in 6 processes; LOCATED IN: endomembrane system, extracellular region; EXPRESSED IN: 21 plant structures; EXPRESSED DURING: 13 growth stages; CONTAINS InterPro DOMAIN/s: Barwin-related endoglucanase (InterPro:IPR009009), Pollen allergen, N-terminal (InterPro:IPR014734), Expansin (InterPro:IPR002963), Rare lipoprotein A (InterPro:IPR005132), Expansin/Lol pI (InterPro:IPR007118),…	Barwin-like endoglucanase | Expansin | Expansin, cellulose-binding-like domain | Expansin/Lol pI | Expansin/pollen allergen, DPBB domain | RlpA-like double-psi beta-barrel domain
3.80957	17.9684	AT2G38120	4	96	GTAG	GTAG	Transmembrane amino acid transporter family protein	AUXIN RESISTANT 1 (AUX1); CONTAINS InterPro DOMAIN/s: Amino acid transporter, transmembrane (InterPro:IPR013057); BEST Arabidopsis thaliana protein match is: like AUXIN RESISTANT 1 (TAIR:AT5G01240.1)	Amino acid transporter, transmembrane
6.00569	3.6704	AT2G38130	1	696	GTAG	GTAG	Acyl-CoA N-acyltransferases (NAT) superfamily protein	ATMAK3; FUNCTIONS IN: N-acetyltransferase activity; INVOLVED IN: metabolic process; LOCATED IN: cytoplasm; EXPRESSED IN: 22 plant structures; EXPRESSED DURING: 13 growth stages; CONTAINS InterPro DOMAIN/s: GCN5-related N-acetyltransferase, C-terminal (InterPro:IPR022610), GCN5-related N-acetyltransferase (InterPro:IPR000182), Acyl-CoA N-acyltransferase (InterPro:IPR016181); BEST Arabidopsis thali…	Acyl-CoA N-acyltransferase | GNAT domain
7.39938	2.45545	AT2G38330	9	88	GTAG	GTAG	MATE efflux family protein	MATE efflux family protein; FUNCTIONS IN: antiporter activity, drug transmembrane transporter activity, transporter activity; INVOLVED IN: drug transmembrane transport, transmembrane transport; LOCATED IN: chloroplast, membrane; EXPRESSED IN: 22 plant structures; EXPRESSED DURING: 13 growth stages; CONTAINS InterPro DOMAIN/s: Multi antimicrobial extrusion protein MatE (InterPro:IPR002528); BEST A…	Multi antimicrobial extrusion protein
4.49262	5.86515	AT2G38780	2	367	GTAG	GTAG		unknown protein; FUNCTIONS IN: molecular_function unknown; INVOLVED IN: biological_process unknown; LOCATED IN: chloroplast; EXPRESSED IN: 21 plant structures; EXPRESSED DURING: 13 growth stages
3.60262	2.10929	AT2G38860	3	86	GTAG	GTAG	Class I glutamine amidotransferase-like superfamily protein	YLS5; INVOLVED IN: response to ethylene stimulus, response to salt stress, leaf senescence, response to abscisic acid stimulus; LOCATED IN: endomembrane system; EXPRESSED IN: 23 plant structures; EXPRESSED DURING: 13 growth stages; CONTAINS InterPro DOMAIN/s: ThiJ/PfpI (InterPro:IPR002818); BEST Arabidopsis thaliana protein match is: Class I glutamine amidotransferase-like superfamily protein (TA…	Class I glutamine amidotransferase-like | ThiJ/PfpI
7.66422	8.66369	AT2G39100	1	80	GTAG	GTAG	RING/U-box superfamily protein	RING/U-box superfamily protein; FUNCTIONS IN: zinc ion binding; EXPRESSED IN: leaf; EXPRESSED DURING: LP.04 four leaves visible; CONTAINS InterPro DOMAIN/s: Zinc finger, RING-type, conserved site (InterPro:IPR017907), Zinc finger, RING-type (InterPro:IPR001841), Zinc finger, C3HC4 RING-type (InterPro:IPR018957)	Zinc finger, RING-type | Zinc finger, RING-type, conserved site | Zinc finger, RING/FYVE/PHD-type
3.15437	5.45441	AT2G39130	11	235	GTAG	GTAG	Transmembrane amino acid transporter family protein	Transmembrane amino acid transporter family protein; FUNCTIONS IN: amino acid transmembrane transporter activity; INVOLVED IN: biological_process unknown; LOCATED IN: plasma membrane; EXPRESSED IN: 24 plant structures; EXPRESSED DURING: 15 growth stages; CONTAINS InterPro DOMAIN/s: Amino acid transporter, transmembrane (InterPro:IPR013057); BEST Arabidopsis thaliana protein match is: Transmembran…	Amino acid transporter, transmembrane
7.339	8.34867	AT2G39190	1	408	GTAG	GTAG	Protein kinase superfamily protein	ATATH8; FUNCTIONS IN: transporter activity; LOCATED IN: chloroplast; EXPRESSED IN: 21 plant structures; EXPRESSED DURING: 13 growth stages; CONTAINS InterPro DOMAIN/s: ABC-1 (InterPro:IPR004147); CONTAINS InterPro DOMAIN/s: ABC-1 (InterPro:IPR004147), Aminoglycoside phosphotransferase (InterPro:IPR002575), Protein kinase-like domain (InterPro:IPR011009); BEST Arabidopsis thaliana protein match is…	Aminoglycoside phosphotransferase | Protein kinase-like domain | UbiB domain
4.56601	5.85205	AT2G39260	3	248	GTAG	GTAG	binding;RNA binding	binding;RNA binding; FUNCTIONS IN: RNA binding, binding; INVOLVED IN: translation, RNA metabolic process; LOCATED IN: cellular_component unknown; EXPRESSED IN: 23 plant structures; EXPRESSED DURING: 13 growth stages; CONTAINS InterPro DOMAIN/s: Armadillo-type fold (InterPro:IPR016024), MIF4G-like, type 3 (InterPro:IPR003890), Up-frameshift suppressor 2 (InterPro:IPR007193), MIF4-like, type 1/2/3 …	Armadillo-type fold | MIF4-like, type 1/2/3 | MIF4G-like, type 3 | Up-frameshift suppressor 2
3.06717	4.15453	AT2G39970	9	92	GTAG	GTAG	Mitochondrial substrate carrier family protein	Mitochondrial substrate carrier family protein; FUNCTIONS IN: binding; INVOLVED IN: transport, transmembrane transport; LOCATED IN: mitochondrial inner membrane, peroxisomal membrane, plasma membrane; EXPRESSED IN: 23 plant structures; EXPRESSED DURING: 15 growth stages; CONTAINS InterPro DOMAIN/s: Mitochondrial substrate carrier (InterPro:IPR001993), Mitochondrial substrate/solute carrier (Inter…	Mitochondrial carrier domain | Mitochondrial substrate/solute carrier
4.96567	5.35533	AT2G40410	2	101	GTAG	GTAG	Staphylococcal nuclease homologue	Staphylococcal nuclease homologue; FUNCTIONS IN: hydrolase activity, acting on ester bonds, nuclease activity, nucleic acid binding; FUNCTIONS IN: nuclease activity; INVOLVED IN: N-terminal protein myristoylation; LOCATED IN: cellular_component unknown; EXPRESSED IN: 23 plant structures; EXPRESSED DURING: 13 growth stages; CONTAINS InterPro DOMAIN/s: Staphylococcal nuclease (SNase-like) (InterPro…	Staphylococcal nuclease (SNase-like), OB-fold
2.94987	4.53349	AT2G40600	2	192	GTAG	GTAG	appr-1-p processing enzyme family protein	appr-1-p processing enzyme family protein; FUNCTIONS IN: molecular_function unknown; INVOLVED IN: biological_process unknown; LOCATED IN: chloroplast; EXPRESSED IN: 22 plant structures; EXPRESSED DURING: 13 growth stages; CONTAINS InterPro DOMAIN/s: Appr-1-p processing (InterPro:IPR002589); BEST Arabidopsis thaliana protein match is: appr-1-p processing enzyme family protein (TAIR:AT1G69340.1)	Macro domain
4.22702	2.63551	AT2G40650	1	471	GTAG	GTAG	PRP38 family protein	PRP38 family protein; CONTAINS InterPro DOMAIN/s: PRP38 (InterPro:IPR005037); BEST Arabidopsis thaliana protein match is: SART-1 family (TAIR:AT5G16780.1)	Pre-mRNA-splicing factor 38 | Pre-mRNA-splicing factor 38, C-terminal
6.05965	13.4677	AT2G40660	8	122	GTAG	GTAG	Nucleic acid-binding, OB-fold-like protein	Nucleic acid-binding, OB-fold-like protein; FUNCTIONS IN: tRNA binding; INVOLVED IN: tRNA aminoacylation for protein translation; EXPRESSED IN: 22 plant structures; EXPRESSED DURING: 14 growth stages; CONTAINS InterPro DOMAIN/s: Nucleic acid-binding, OB-fold-like (InterPro:IPR016027), Nucleic acid-binding, OB-fold (InterPro:IPR012340), tRNA-binding domain (InterPro:IPR002547); BEST Arabidopsis th…
11.6768	4.7021	AT2G40770	2	93	GTAG	GTAG	zinc ion binding;DNA binding;helicases;ATP binding;nucleic acid binding	zinc ion binding;DNA binding;helicases;ATP binding;nucleic acid binding; FUNCTIONS IN: helicase activity, DNA binding, zinc ion binding, nucleic acid binding, ATP binding; EXPRESSED IN: 21 plant structures; EXPRESSED DURING: 11 growth stages; CONTAINS InterPro DOMAIN/s: Zinc finger, RING-type (InterPro:IPR001841), Zinc finger, PHD-type, conserved site (InterPro:IPR019786), Zinc finger, PHD-type (…	Helicase, C-terminal | Helicase, superfamily 1/2, ATP-binding domain | P-loop containing nucleoside triphosphate hydrolase | SNF2-related | Tetratricopeptide repeat-containing domain | Zinc finger, FYVE/PHD-type | Zinc finger, PHD-type | Zinc finger, PHD-type, conserved site | Zinc finger, RING-type | Zinc finger, RING/FYVE/PHD-type
4.1037	4.64634	AT2G40820	11	109	GTAG	GTAG		FUNCTIONS IN: molecular_function unknown; INVOLVED IN: biological_process unknown; LOCATED IN: plasma membrane; EXPRESSED IN: 21 plant structures; EXPRESSED DURING: 13 growth stages; BEST Arabidopsis thaliana protein match is: myosin heavy chain-related (TAIR:AT3G56480.1)
21.0205	42.6526	AT2G41020	4	81	GTAG	GTAG	WW domain-containing protein	WW domain-containing protein; CONTAINS InterPro DOMAIN/s: WW/Rsp5/WWP (InterPro:IPR001202)	WW domain
4.58323	2.52755	AT2G41650	1	81	GTAG	GTAG		unknown protein; FUNCTIONS IN: molecular_function unknown; INVOLVED IN: biological_process unknown; LOCATED IN: chloroplast; EXPRESSED IN: 22 plant structures; EXPRESSED DURING: 13 growth stages
34.4325	36.4806	AT2G41760	2	138	GCAG	GCAG		unknown protein; CONTAINS InterPro DOMAIN/s: Protein of unknown function WDYHV (InterPro:IPR019161)	Protein N-terminal glutamine amidohydrolase, alpha beta roll
5.30987	6.79298	AT2G41790	4	74	GTAG	GTAG	Insulinase (Peptidase family M16) family protein	Insulinase (Peptidase family M16) family protein; FUNCTIONS IN: metalloendopeptidase activity, zinc ion binding, catalytic activity, metal ion binding; INVOLVED IN: proteolysis; LOCATED IN: cellular_component unknown; EXPRESSED IN: 23 plant structures; EXPRESSED DURING: 13 growth stages; CONTAINS InterPro DOMAIN/s: Peptidase M16, zinc-binding site (InterPro:IPR001431), Peptidase M16, C-terminal (…	Metalloenzyme, LuxS/M16 peptidase-like | Peptidase M16 domain | Peptidase M16, C-terminal domain | Peptidase M16, N-terminal | Peptidase M16, zinc-binding site
4.65913	4.38446	AT2G41945	3	76	GTAG	GTAG		unknown protein; FUNCTIONS IN: molecular_function unknown; INVOLVED IN: biological_process unknown; LOCATED IN: membrane; BEST Arabidopsis thaliana protein match is: unknown protein (TAIR:AT3G04040.1); BEST Arabidopsis thaliana protein match is: unknown protein (TAIR:AT5G18250.1)
5.26696	6.97596	AT2G42080	2	97	GTAG	GTAG	Chaperone DnaJ-domain superfamily protein	Chaperone DnaJ-domain superfamily protein; FUNCTIONS IN: heat shock protein binding; INVOLVED IN: protein folding; LOCATED IN: chloroplast; EXPRESSED IN: 23 plant structures; EXPRESSED DURING: 15 growth stages; CONTAINS InterPro DOMAIN/s: Molecular chaperone, heat shock protein, Hsp40, DnaJ (InterPro:IPR015609), Heat shock protein DnaJ, N-terminal (InterPro:IPR001623); BEST Arabidopsis thaliana p…	DnaJ domain
2.93442	2.79372	AT2G42380	2	114	GTAG	GTAG	Basic-leucine zipper (bZIP) transcription factor family protein	BZIP34; FUNCTIONS IN: DNA binding, transcription activator activity, sequence-specific DNA binding transcription factor activity; INVOLVED IN: regulation of transcription, DNA-dependent; LOCATED IN: nucleus; EXPRESSED IN: male gametophyte, flower, carpel; EXPRESSED DURING: L mature pollen stage, M germinated pollen stage, 4 anthesis, petal differentiation and expansion stage; CONTAINS InterPro DO…	Basic-leucine zipper domain
3.3306	2.52049	AT2G42730	3	154	GTAG	GTAG	F-box family protein	F-box family protein; CONTAINS InterPro DOMAIN/s: F-box domain, cyclin-like (InterPro:IPR001810), F-box domain, Skp2-like (InterPro:IPR022364), FBD-like (InterPro:IPR006566), Leucine-rich repeat 2 (InterPro:IPR013101); FUNCTIONS IN: zinc ion binding; BEST Arabidopsis thaliana protein match is: FBD, F-box, Skp2-like and Leucine Rich Repeat domains containing protein (TAIR:AT2G42720.1); INVOLVED IN…	F-box domain | FBD domain | Leucine-rich repeat 2 | Transcription elongation factor S-II, central domain | Transcription elongation factor S-IIM | Transcription elongation factor, TFIIS/CRSP70, N-terminal, sub-type | Transcription factor IIS, N-terminal
36.4436	19.6166	AT2G42770	4	324	GTAG	GTAG	Peroxisomal membrane 22 kDa (Mpv17/PMP22) family protein	Peroxisomal membrane 22 kDa (Mpv17/PMP22) family protein; FUNCTIONS IN: molecular_function unknown; INVOLVED IN: biological_process unknown; LOCATED IN: peroxisomal membrane, chloroplast, chloroplast envelope; EXPRESSED IN: 23 plant structures; EXPRESSED DURING: 13 growth stages; CONTAINS InterPro DOMAIN/s: Mpv17/PMP22 (InterPro:IPR007248); BEST Arabidopsis thaliana protein match is: Peroxisomal …	Mpv17/PMP22
7.2251	8.06289	AT2G42780	2	104	GTAG	GTAG		FUNCTIONS IN: molecular_function unknown; INVOLVED IN: regulation of transcription; LOCATED IN: integral to membrane, nucleus; EXPRESSED IN: 20 plant structures; EXPRESSED DURING: 11 growth stages; CONTAINS InterPro DOMAIN/s: RNA polymerase II transcription factor SIII, subunit A (InterPro:IPR010684)	RNA polymerase II transcription factor SIII, subunit A
13.9606	17.4389	AT2G42880	6	79	GTAG	GTAG	MAP kinase 20	MAP kinase 20 (MPK20); CONTAINS InterPro DOMAIN/s: Protein kinase, ATP binding site (InterPro:IPR017441), MAP kinase, conserved site (InterPro:IPR003527), Protein kinase, catalytic domain (InterPro:IPR000719), Serine/threonine-protein kinase domain (InterPro:IPR002290), Serine/threonine-protein kinase-like domain (InterPro:IPR017442), Protein kinase-like domain (InterPro:IPR011009); BEST Arabidop…	Mitogen-activated protein (MAP) kinase, conserved site | Protein kinase domain | Protein kinase, ATP binding site | Protein kinase-like domain | Serine/threonine/dual specificity protein kinase, catalytic domain
2.49973	2.42385	AT2G43080	3	172	GTAG	GTAG	P4H isoform 1	P4H isoform 1 (AT-P4H-1); FUNCTIONS IN: oxidoreductase activity, acting on paired donors, with incorporation or reduction of molecular oxygen, 2-oxoglutarate as one donor, and incorporation of one atom each of oxygen into both donors, procollagen-proline 4-dioxygenase activity; INVOLVED IN: peptidyl-proline hydroxylation to 4-hydroxy-L-proline; LOCATED IN: endomembrane system; EXPRESSED IN: 23 pl…	Oxoglutarate/iron-dependent dioxygenase | Prolyl 4-hydroxylase, alpha subunit
8.9384	6.28451	AT2G43370	2	83	GTAG	GTAG	RNA-binding (RRM/RBD/RNP motifs) family protein	RNA-binding (RRM/RBD/RNP motifs) family protein; FUNCTIONS IN: RNA binding, nucleotide binding, nucleic acid binding; INVOLVED IN: biological_process unknown; LOCATED IN: nucleus; CONTAINS InterPro DOMAIN/s: RNA recognition motif, RNP-1 (InterPro:IPR000504), Nucleotide-binding, alpha-beta plait (InterPro:IPR012677); BEST Arabidopsis thaliana protein match is: U1 small nuclear ribonucleoprotein-70…	Nucleotide-binding, alpha-beta plait | RNA recognition motif domain
2.52916	2.63302	AT2G43630	2	184	GTAG	GTAG		FUNCTIONS IN: molecular_function unknown; INVOLVED IN: biological_process unknown; LOCATED IN: chloroplast thylakoid membrane, chloroplast, nucleus, chloroplast envelope; EXPRESSED IN: 22 plant structures; EXPRESSED DURING: 13 growth stages; BEST Arabidopsis thaliana protein match is: glycine-rich protein (TAIR:AT3G59640.2)
31.0325	10.0386	AT2G43650	14	108	GTAG	GTAG	Sas10/U3 ribonucleoprotein (Utp) family protein	EMBRYO DEFECTIVE 2777 (EMB2777); FUNCTIONS IN: molecular_function unknown; INVOLVED IN: gene silencing; LOCATED IN: nucleus; EXPRESSED IN: 22 plant structures; EXPRESSED DURING: 12 growth stages; CONTAINS InterPro DOMAIN/s: Sas10/Utp3/C1D (InterPro:IPR007146), Something about silencing protein 10 (Sas10), C-terminal (InterPro:IPR018972); BEST Arabidopsis thaliana protein match is: unknown protein…	Sas10 C-terminal domain | Sas10/Utp3/C1D
3.11554	2.96373	AT2G43910	4	157	GTAG	GTAG	HARMLESS TO OZONE LAYER 1	HARMLESS TO OZONE LAYER 1 (HOL1); FUNCTIONS IN: methyltransferase activity, thiopurine S-methyltransferase activity; INVOLVED IN: metabolic process; EXPRESSED IN: guard cell; LOCATED IN: plasma membrane; CONTAINS InterPro DOMAIN/s: Thiopurine S-methyltransferase (InterPro:IPR008854); EXPRESSED IN: guard cell, cultured cell, leaf; BEST Arabidopsis thaliana protein match is: S-adenosyl-L-methionine…	S-adenosyl-L-methionine-dependent methyltransferase-like | TPMT family
3.00171	2.19694	AT2G43920	6	88	GTAG	GTAG	S-adenosyl-L-methionine-dependent methyltransferases superfamily protein	HARMLESS TO OZONE LAYER 2 (HOL2); FUNCTIONS IN: methyltransferase activity, thiopurine S-methyltransferase activity; INVOLVED IN: metabolic process; LOCATED IN: cytoplasm; CONTAINS InterPro DOMAIN/s: Thiopurine S-methyltransferase (InterPro:IPR008854); BEST Arabidopsis thaliana protein match is: HARMLESS TO OZONE LAYER 1 (TAIR:AT2G43910.1); BEST Arabidopsis thaliana protein match is: HARMLESS TO …	S-adenosyl-L-methionine-dependent methyltransferase-like | TPMT family
5.2294	8.87133	AT2G43980	2	84	GCAG	GCAG	inositol 1,3,4-trisphosphate 5/6-kinase 4	inositol 1,3,4-trisphosphate 5/6-kinase 4 (ITPK4); FUNCTIONS IN: magnesium ion binding, inositol-1,3,4-trisphosphate 5/6-kinase activity, catalytic activity, ATP binding, inositol tetrakisphosphate 1-kinase activity; INVOLVED IN: inositol trisphosphate metabolic process; LOCATED IN: intracellular; EXPRESSED IN: 22 plant structures; EXPRESSED DURING: 13 growth stages; CONTAINS InterPro DOMAIN/s: I…	Inositol-tetrakisphosphate 1-kinase | Inositol-tetrakisphosphate 1-kinase 4
38.2147	13.5598	AT2G44100	1	349	GTAG	GTAG	guanosine nucleotide diphosphate dissociation inhibitor 1	guanosine nucleotide diphosphate dissociation inhibitor 1 (GDI1); CONTAINS InterPro DOMAIN/s: Rab GTPase activator (InterPro:IPR002005), GDP dissociation inhibitor (InterPro:IPR018203), Rab GDI protein (InterPro:IPR000806); BEST Arabidopsis thaliana protein match is: RAB GDP dissociation inhibitor 2 (TAIR:AT3G59920.1)	GDP dissociation inhibitor | Rab GDI protein
14.1396	6.63537	AT2G44210	2	89	GTAG	GTAG	Protein of Unknown Function (DUF239)	Protein of Unknown Function (DUF239); INVOLVED IN: biological_process unknown; LOCATED IN: endomembrane system; EXPRESSED IN: 22 plant structures; EXPRESSED DURING: 14 growth stages; CONTAINS InterPro DOMAIN/s: Protein of unknown function DUF239, plant (InterPro:IPR004314); BEST Arabidopsis thaliana protein match is: Protein of Unknown Function (DUF239) (TAIR:AT1G55360.1)	Domain of unknown function DUF239 | Domain of unknown function DUF4409
6.61548	9.33541	AT2G44280	3	92	GTAG	GTAG	Major facilitator superfamily protein	Major facilitator superfamily protein; FUNCTIONS IN: molecular_function unknown; INVOLVED IN: biological_process unknown; LOCATED IN: cellular_component unknown; BEST Arabidopsis thaliana protein match is: Major facilitator superfamily protein (TAIR:AT3G60070.1); CONTAINS InterPro DOMAIN/s: Major facilitator superfamily, general substrate transporter (InterPro:IPR016196)	Major facilitator superfamily domain, general substrate transporter
6.16292	8.14982	AT2G44920	2	494	GTAG	GTAG	Tetratricopeptide repeat (TPR)-like superfamily protein	Tetratricopeptide repeat (TPR)-like superfamily protein; FUNCTIONS IN: molecular_function unknown; LOCATED IN: thylakoid, thylakoid lumen, chloroplast thylakoid membrane, chloroplast thylakoid lumen, chloroplast; EXPRESSED IN: 24 plant structures; EXPRESSED DURING: 13 growth stages; CONTAINS InterPro DOMAIN/s: Pentapeptide repeat (InterPro:IPR001646); BEST Arabidopsis thaliana protein match is: P…	Pentapeptide repeat
4.1619	144.994	AT2G44950	13	75	GTAG	GTAG	histone mono-ubiquitination 1	histone mono-ubiquitination 1 (HUB1); FUNCTIONS IN: ubiquitin-protein ligase activity, protein homodimerization activity, zinc ion binding; INVOLVED IN: in 10 processes; LOCATED IN: mitochondrion, nucleus; EXPRESSED IN: 25 plant structures; EXPRESSED DURING: 14 growth stages; CONTAINS InterPro DOMAIN/s: Zinc finger, RING-type, conserved site (InterPro:IPR017907), Zinc finger, RING-type (InterPro:…	Zinc finger, RING-type | Zinc finger, RING-type, conserved site | Zinc finger, RING/FYVE/PHD-type
8.82455	5.38059	AT2G44950	4	238	GTAG	GTAG	histone mono-ubiquitination 1	histone mono-ubiquitination 1 (HUB1); FUNCTIONS IN: ubiquitin-protein ligase activity, protein homodimerization activity, zinc ion binding; INVOLVED IN: in 10 processes; LOCATED IN: mitochondrion, nucleus; EXPRESSED IN: 25 plant structures; EXPRESSED DURING: 14 growth stages; CONTAINS InterPro DOMAIN/s: Zinc finger, RING-type, conserved site (InterPro:IPR017907), Zinc finger, RING-type (InterPro:…	Zinc finger, RING-type | Zinc finger, RING-type, conserved site | Zinc finger, RING/FYVE/PHD-type
90.7391	7.71526	AT2G44950	14	730	GTAG	GTAG	histone mono-ubiquitination 1	histone mono-ubiquitination 1 (HUB1); FUNCTIONS IN: ubiquitin-protein ligase activity, protein homodimerization activity, zinc ion binding; INVOLVED IN: in 10 processes; LOCATED IN: mitochondrion, nucleus; EXPRESSED IN: 25 plant structures; EXPRESSED DURING: 14 growth stages; CONTAINS InterPro DOMAIN/s: Zinc finger, RING-type, conserved site (InterPro:IPR017907), Zinc finger, RING-type (InterPro:…	Zinc finger, RING-type | Zinc finger, RING-type, conserved site | Zinc finger, RING/FYVE/PHD-type
8.29612	8.97063	AT2G45000	5	252	GTAG	GTAG	structural constituent of nuclear pore	EMBRYO DEFECTIVE 2766 (EMB2766); FUNCTIONS IN: structural constituent of nuclear pore; INVOLVED IN: biological_process unknown; LOCATED IN: chloroplast, nuclear pore; CONTAINS InterPro DOMAIN/s: Nucleoporin, Nsp1-like, C-terminal (InterPro:IPR007758)	Nucleoporin NSP1/NUP62 | Nucleoporin, NSP1-like, C-terminal
4.14378	6.25397	AT2G45500	7	71	GTAG	GTAG	AAA-type ATPase family protein	AAA-type ATPase family protein; FUNCTIONS IN: nucleoside-triphosphatase activity, nucleotide binding, ATP binding; EXPRESSED IN: 11 plant structures; EXPRESSED DURING: LP.06 six leaves visible, 4 anthesis, petal differentiation and expansion stage, E expanded cotyledon stage; CONTAINS InterPro DOMAIN/s: ATPase, AAA+ type, core (InterPro:IPR003593), ATPase, AAA-type, core (InterPro:IPR003959), ATP…	AAA+ ATPase domain | ATPase, AAA-type, conserved site | ATPase, AAA-type, core | MIT | P-loop containing nucleoside triphosphate hydrolase
2.87003	3.2337	AT2G45540	13	112	GTAG	GTAG	WD-40 repeat family protein / beige-related	WD-40 repeat family protein / beige-related; FUNCTIONS IN: nucleotide binding; INVOLVED IN: biological_process unknown; LOCATED IN: cellular_component unknown; EXPRESSED IN: 24 plant structures; EXPRESSED IN: 25 plant structures; EXPRESSED DURING: 14 growth stages; CONTAINS InterPro DOMAIN/s: WD40 repeat 2 (InterPro:IPR019782), WD40 repeat-like-containing domain (InterPro:IPR011046), Beige/BEACH …	BEACH domain | Concanavalin A-like lectin/glucanases superfamily | PH-BEACH domain | WD40 repeat | WD40-repeat-containing domain | WD40/YVTN repeat-like-containing domain
34.2019	4.59949	AT2G45640	5	114	GTAG	GTAG	SIN3 associated polypeptide P18	SIN3 associated polypeptide P18 (SAP18); FUNCTIONS IN: protein binding, transcription regulator activity; INVOLVED IN: response to salt stress, response to abscisic acid stimulus; EXPRESSED IN: 22 plant structures; LOCATED IN: nucleolus; EXPRESSED DURING: 13 growth stages; CONTAINS InterPro DOMAIN/s: Sin3 associated polypeptide p18 (InterPro:IPR010516), Histone deacetylase complex, SAP18 subunit …	Histone deacetylase complex, SAP18 subunit | Sin3 associated polypeptide p18
4.41032	7.41428	AT2G45695	2	83	GTAG	GTAG	Ubiquitin related modifier 1	Ubiquitin related modifier 1; FUNCTIONS IN: molecular_function unknown; INVOLVED IN: biological_process unknown; LOCATED IN: cellular_component unknown; CONTAINS InterPro DOMAIN/s: Ubiquitin related modifier 1 (InterPro:IPR015221), Ubiquitin-related modifier 1 (InterPro:IPR017188), Molybdopterin synthase/thiamin biosynthesis sulphur carrier, beta-grasp (InterPro:IPR016155); BEST Arabidopsis thali…	Beta-grasp domain | Molybdopterin synthase/thiamin biosynthesis sulphur carrier, beta-grasp | Ubiquitin-related modifier 1
4.36023	4.04886	AT2G45770	7	92	GTAG	GTAG	signal recognition particle receptor protein, chloroplast (FTSY)	CPFTSY; FUNCTIONS IN: GTP binding; FUNCTIONS IN: nucleoside-triphosphatase activity, GTP binding, nucleotide binding; INVOLVED IN: protein import into chloroplast thylakoid membrane, protein targeting, thylakoid membrane organization, photosynthetic electron transport in photosystem II; LOCATED IN: chloroplast, signal recognition particle, endoplasmic reticulum targeting, chloroplast thylakoid; E…	AAA+ ATPase domain | P-loop containing nucleoside triphosphate hydrolase | Signal recognition particle, SRP54 subunit, GTPase domain | Signal recognition particle, SRP54 subunit, helical bundle | Signal-recognition particle receptor FtsY
4.18786	4.34714	AT2G45990	6	92	GTAG	GTAG		unknown protein; FUNCTIONS IN: molecular_function unknown; INVOLVED IN: biological_process unknown; LOCATED IN: chloroplast; LOCATED IN: chloroplast, chloroplast stroma; EXPRESSED IN: 22 plant structures; EXPRESSED DURING: 13 growth stages	HAD-like domain
3.84164	3.5535	AT2G46560	6	76	GTAG	GTAG	transducin family protein / WD-40 repeat family protein	transducin family protein / WD-40 repeat family protein; CONTAINS InterPro DOMAIN/s: WD40 repeat 2 (InterPro:IPR019782), WD40 repeat (InterPro:IPR001680), RAVE protein 1 C-terminal (InterPro:IPR022033), WD40 repeat-like-containing domain (InterPro:IPR011046), WD40-repeat-containing domain (InterPro:IPR017986), WD40/YVTN repeat-like-containing domain (InterPro:IPR015943), WD40 repeat, subgroup (In…	RAVE complex protein Rav1 C-terminal | WD40 repeat | WD40-repeat-containing domain | WD40/YVTN repeat-like-containing domain
3.31683	4.09599	AT2G46810	2	78	GTAG	GTAG	basic helix-loop-helix (bHLH) DNA-binding superfamily protein	basic helix-loop-helix (bHLH) DNA-binding superfamily protein; FUNCTIONS IN: DNA binding, sequence-specific DNA binding transcription factor activity; INVOLVED IN: regulation of transcription; LOCATED IN: nucleus; CONTAINS InterPro DOMAIN/s: Helix-loop-helix DNA-binding domain (InterPro:IPR001092), Helix-loop-helix DNA-binding (InterPro:IPR011598); BEST Arabidopsis thaliana protein match is: basi…	Myc-type, basic helix-loop-helix (bHLH) domain
25.9501	1262.13	AT2G46930	4	94	GTAG	GTAG	Pectinacetylesterase family protein	Pectinacetylesterase family protein; FUNCTIONS IN: carboxylesterase activity; LOCATED IN: endomembrane system; EXPRESSED IN: 22 plant structures; EXPRESSED DURING: 13 growth stages; CONTAINS InterPro DOMAIN/s: Pectinacetylesterase (InterPro:IPR004963); BEST Arabidopsis thaliana protein match is: Pectinacetylesterase family protein (TAIR:AT3G62060.1)	Protein notum homologue
4.07363	3.57905	AT2G47240	16	88	GTAG	GTAG	AMP-dependent synthetase and ligase family protein	LONG-CHAIN ACYL-COA SYNTHASE 1 (LACS1); FUNCTIONS IN: long-chain fatty acid-CoA ligase activity, very long-chain fatty acid-CoA ligase activity; INVOLVED IN: fatty acid biosynthetic process, cutin biosynthetic process, wax biosynthetic process; LOCATED IN: cellular_component unknown; EXPRESSED IN: 29 plant structures; EXPRESSED DURING: 13 growth stages; CONTAINS InterPro DOMAIN/s: AMP-binding, co…	AMP-binding, conserved site | AMP-dependent synthetase/ligase
12.401	8.56958	AT2G47350	3	87	GTAG	GTAG	HIT zinc finger ;PAPA-1-like conserved region	HIT zinc finger ;PAPA-1-like conserved region; CONTAINS InterPro DOMAIN/s: PAPA-1-like conserved region (InterPro:IPR006880); CONTAINS InterPro DOMAIN/s: Zinc finger, HIT-type (InterPro:IPR007529), PAPA-1-like conserved region (InterPro:IPR006880); BEST Arabidopsis thaliana protein match is: PAPA-1-like family protein / zinc finger (HIT type) family protein (TAIR:AT3G06660.1)	INO80 complex subunit B-like conserved region | INO80 complex, subunit Ies2 | Zinc finger, HIT-type
11.7443	4.8433	AT2G47500	1	231	GTAG	GTAG	P-loop nucleoside triphosphate hydrolases superfamily protein with CH (Calponin Homology) domain	P-loop nucleoside triphosphate hydrolases superfamily protein with CH (Calponin Homology) domain; FUNCTIONS IN: microtubule motor activity, ATP binding; INVOLVED IN: microtubule-based movement; EXPRESSED IN: 21 plant structures; EXPRESSED DURING: 12 growth stages; CONTAINS InterPro DOMAIN/s: Calponin-homology (InterPro:IPR016146), Calponin-like actin-binding (InterPro:IPR001715), Kinesin, motor d…	Calponin homology domain | Kinesin, motor domain | Kinesin-like protein | P-loop containing nucleoside triphosphate hydrolase
2.34221	2.51474	AT2G47620	4	85	GTAG	GTAG	SWITCH/sucrose nonfermenting 3A	SWITCH/sucrose nonfermenting 3A (SWI3A); FUNCTIONS IN: DNA binding; INVOLVED IN: chromatin remodeling; LOCATED IN: SWI/SNF complex; EXPRESSED IN: 13 plant structures; EXPRESSED DURING: 6 growth stages; CONTAINS InterPro DOMAIN/s: SANT, DNA-binding (InterPro:IPR001005), Homeodomain-like (InterPro:IPR009057), Myb, DNA-binding (InterPro:IPR014778), SWIRM (InterPro:IPR007526), SANT, eukarya (InterPro…	Homeodomain-like | SANT domain | SANT/Myb domain | SWIRM domain | Winged helix-turn-helix DNA-binding domain
10.4696	3.32452	AT2G47700	2	89	GTAG	GTAG	RING/U-box superfamily protein	RED AND FAR-RED INSENSITIVE 2 (RFI2); CONTAINS InterPro DOMAIN/s: Zinc finger, RING-type (InterPro:IPR001841), Zinc finger, C3HC4 RING-type (InterPro:IPR018957); BEST Arabidopsis thaliana protein match is: RING/U-box superfamily protein (TAIR:AT3G05545.1)	Zinc finger, RING-type | Zinc finger, RING/FYVE/PHD-type
20.8738	6.75544	AT2G47760	1	83	GTAG	GTAG	asparagine-linked glycosylation 3	asparagine-linked glycosylation 3 (ALG3); CONTAINS InterPro DOMAIN/s: Glycosyltransferase, ALG3 (InterPro:IPR007873)	Glycosyltransferase, ALG3
9.91018	4.28045	AT2G47850	5	85	GTAG	GTAG	Zinc finger C-x8-C-x5-C-x3-H type family protein	Zinc finger C-x8-C-x5-C-x3-H type family protein; FUNCTIONS IN: zinc ion binding, nucleic acid binding; INVOLVED IN: biological_process unknown; EXPRESSED IN: 22 plant structures; EXPRESSED DURING: 13 growth stages; CONTAINS InterPro DOMAIN/s: Zinc finger, CCCH-type (InterPro:IPR000571); BEST Arabidopsis thaliana protein match is: Zinc finger C-x8-C-x5-C-x3-H type family protein (TAIR:AT5G18550.1)	Zinc finger, CCCH-type
150.155	167.531	AT2G47960	3	78	GTAG	GTAG		unknown protein; CONTAINS InterPro DOMAIN/s: Protein of unknown function DUF974 (InterPro:IPR010378)	Protein of unknown function DUF974
10.3792	6.15483	AT2G48130	2	75	GTAG	GTAG	Bifunctional inhibitor/lipid-transfer protein/seed storage 2S albumin superfamily protein	Bifunctional inhibitor/lipid-transfer protein/seed storage 2S albumin superfamily protein; FUNCTIONS IN: lipid binding; INVOLVED IN: lipid transport; LOCATED IN: anchored to membrane; EXPRESSED IN: hypocotyl, root, flower; EXPRESSED DURING: petal differentiation and expansion stage; CONTAINS InterPro DOMAIN/s: Bifunctional inhibitor/plant lipid transfer protein/seed storage (InterPro:IPR016140), …	Bifunctional inhibitor/plant lipid transfer protein/seed storage helical domain | Plant lipid transfer protein/Par allergen
2.00562	8.17125	AT3G01100	8	76	GTAG	GTAG	hypothetical protein 1	hypothetical protein 1 (HYP1); LOCATED IN: endomembrane system, membrane; EXPRESSED IN: 24 plant structures; EXPRESSED DURING: 14 growth stages; CONTAINS InterPro DOMAIN/s: Protein of unknown function DUF221 (InterPro:IPR003864); BEST Arabidopsis thaliana protein match is: Early-responsive to dehydration stress protein (ERD4) (TAIR:AT1G69450.2)	Domain of unknown function DUF221 | Domain of unknown function DUF4463
7.08313	3.39982	AT3G01100	4	75	GTAG	GTAG	hypothetical protein 1	hypothetical protein 1 (HYP1); LOCATED IN: endomembrane system, membrane; EXPRESSED IN: 24 plant structures; EXPRESSED DURING: 14 growth stages; CONTAINS InterPro DOMAIN/s: Protein of unknown function DUF221 (InterPro:IPR003864); BEST Arabidopsis thaliana protein match is: Early-responsive to dehydration stress protein (ERD4) (TAIR:AT1G69450.2)	Domain of unknown function DUF221 | Domain of unknown function DUF4463
7.58558	13.6387	AT3G01420	7	98	GTAG	GTAG	Peroxidase superfamily protein	DOX1; FUNCTIONS IN: lipoxygenase activity; INVOLVED IN: in 6 processes; LOCATED IN: endomembrane system; EXPRESSED IN: 9 plant structures; EXPRESSED DURING: 4 anthesis; CONTAINS InterPro DOMAIN/s: Haem peroxidase (InterPro:IPR010255), Haem peroxidase, animal (InterPro:IPR002007); BEST Arabidopsis thaliana protein match is: alpha dioxygenase (TAIR:AT1G73680.1)	Haem peroxidase | Haem peroxidase, animal
2.96915	2.83046	AT3G01435	2	96	GTAG	GTAG	Expressed protein	Expressed protein; FUNCTIONS IN: RNA polymerase II transcription mediator activity; INVOLVED IN: regulation of transcription from RNA polymerase II promoter; LOCATED IN: mediator complex; CONTAINS InterPro DOMAIN/s: Mediator complex, subunit Med11 (InterPro:IPR019404)	Mediator complex, subunit Med11
2.5322	2.06493	AT3G01590	3	73	GTAG	GTAG	Galactose mutarotase-like superfamily protein	Galactose mutarotase-like superfamily protein; FUNCTIONS IN: isomerase activity, carbohydrate binding, aldose 1-epimerase activity, catalytic activity; INVOLVED IN: galactose metabolic process, carbohydrate metabolic process; LOCATED IN: cellular_component unknown; EXPRESSED IN: 22 plant structures; EXPRESSED DURING: 13 growth stages; CONTAINS InterPro DOMAIN/s: Glycoside hydrolase-type carbohydr…	Aldose 1-/Glucose-6-phosphate 1-epimerase | Galactose mutarotase-like domain | Glucose-6-phosphate 1-epimerase | Glycoside hydrolase-type carbohydrate-binding, subgroup
7.52818	20.6738	AT3G01640	1	231	GTAG	GTAG	glucuronokinase G	glucuronokinase G (GLCAK); FUNCTIONS IN: poly(U) RNA binding, glucuronokinase activity, ATP binding; INVOLVED IN: cell wall biogenesis, inositol metabolic process, pollen tube development; LOCATED IN: cytoplasm; EXPRESSED IN: 24 plant structures; EXPRESSED DURING: 15 growth stages; CONTAINS InterPro DOMAIN/s: Mevalonate/galactokinase (InterPro:IPR006206), Ribosomal protein S5 domain 2-type fold (…	GHMP kinase N-terminal domain | GHMP kinase, C-terminal domain | Mevalonate/galactokinase | Ribosomal protein S5 domain 2-type fold | Ribosomal protein S5 domain 2-type fold, subgroup
2.74605	4.13574	AT3G01790	2	114	GCAG	GCAG	Ribosomal protein L13 family protein	Ribosomal protein L13 family protein; FUNCTIONS IN: structural constituent of ribosome; INVOLVED IN: translation; LOCATED IN: ribosome, intracellular, large ribosomal subunit; EXPRESSED IN: 22 plant structures; EXPRESSED DURING: 13 growth stages; CONTAINS InterPro DOMAIN/s: Ribosomal protein L13, bacterial-type (InterPro:IPR005823), Ribosomal protein L13 (InterPro:IPR005822); BEST Arabidopsis tha…	Ribosomal protein L13 | Ribosomal protein L13 domain | Ribosomal protein L13, bacterial-type
12.5275	22.9111	AT3G01810	7	89	GTAG	GTAG		FUNCTIONS IN: molecular_function unknown; INVOLVED IN: biological_process unknown; EXPRESSED IN: 21 plant structures; LOCATED IN: plasma membrane; EXPRESSED DURING: 13 growth stages; BEST Arabidopsis thaliana protein match is: nucleolar protein gar2-related (TAIR:AT2G42320.2)	EEIG1/EHBP1 N-terminal domain
3.07552	2.74744	AT3G01860	1	671	GTTT	GTTT		unknown protein; FUNCTIONS IN: molecular_function unknown; INVOLVED IN: response to cadmium ion; EXPRESSED IN: 24 plant structures; LOCATED IN: chloroplast; EXPRESSED DURING: 13 growth stages; BEST Arabidopsis thaliana protein match is: unknown protein (TAIR:AT3G27210.1)
21.9483	7.46471	AT3G02060	7	126	GTAG	GTAG	DEAD/DEAH box helicase, putative	DEAD/DEAH box helicase, putative; FUNCTIONS IN: in 6 functions; INVOLVED IN: DNA repair, regulation of transcription, DNA-dependent; LOCATED IN: chloroplast; EXPRESSED IN: 16 plant structures; EXPRESSED DURING: 12 growth stages; CONTAINS InterPro DOMAIN/s: Transcription-repair-coupling factor (InterPro:IPR005118), DNA/RNA helicase, DEAD/DEAH box type, N-terminal (InterPro:IPR011545), Transcriptio…	CarD-like/TRCF domain | DEAD/DEAH box helicase domain | Helicase, C-terminal | Helicase, superfamily 1/2, ATP-binding domain | P-loop containing nucleoside triphosphate hydrolase
10.7558	30.8589	AT3G02460	3	78	GTAG	GTAG	Ypt/Rab-GAP domain of gyp1p superfamily protein	Ypt/Rab-GAP domain of gyp1p superfamily protein; FUNCTIONS IN: RAB GTPase activator activity; INVOLVED IN: regulation of Rab GTPase activity; LOCATED IN: intracellular; EXPRESSED IN: 24 plant structures; EXPRESSED DURING: 15 growth stages; CONTAINS InterPro DOMAIN/s: RabGAP/TBC (InterPro:IPR000195); BEST Arabidopsis thaliana protein match is: plant adhesion molecule 1 (TAIR:AT5G15930.1)	Rab-GTPase-TBC domain
2.46844	4.33149	AT3G02510	9	98	GTAG	GTAG	Regulator of chromosome condensation (RCC1) family protein	Regulator of chromosome condensation (RCC1) family protein; FUNCTIONS IN: chromatin binding, Ran GTPase binding; INVOLVED IN: biological_process unknown; LOCATED IN: cellular_component unknown; EXPRESSED IN: cultured cell; CONTAINS InterPro DOMAIN/s: Regulator of chromosome condensation/beta-lactamase-inhibitor protein II (InterPro:IPR009091), Regulator of chromosome condensation, RCC1 (InterPro:…	Regulator of chromosome condensation 1/beta-lactamase-inhibitor protein II | Regulator of chromosome condensation, RCC1
16.4974	27.2382	AT3G02540	5	165	GTAG	GTAG	Rad23 UV excision repair protein family	RADIATION SENSITIVE23C (RAD23C); CONTAINS InterPro DOMAIN/s: Ubiquitin-associated/translation elongation factor EF1B, N-terminal, eukaryote (InterPro:IPR015940), Ubiquitin-associated/translation elongation factor EF1B, N-terminal (InterPro:IPR000449), Ubiquitin (InterPro:IPR000626), Ubiquitin supergroup (InterPro:IPR019955), UBA-like (InterPro:IPR009060); FUNCTIONS IN: ubiquitin binding, proteaso…	Heat shock chaperonin-binding | UBA-like | UV excision repair protein Rad23 | Ubiquitin-associated domain/translation elongation factor EF-Ts, N-terminal | Ubiquitin-associated/translation elongation factor EF1B, N-terminal, eukaryote | Ubiquitin-like | Ubiquitin-related domain | XPC-binding domain
4.62177	5.25027	AT3G02830	1	127	GTAG	GTAG	zinc finger protein 1	zinc finger protein 1 (ZFN1); CONTAINS InterPro DOMAIN/s: Zinc finger, CCCH-type (InterPro:IPR000571); BEST Arabidopsis thaliana protein match is: zinc finger nuclease 3 (TAIR:AT5G16540.1)	Zinc finger, CCCH-type
3.83587	3.52869	AT3G03100	1	99	GTAG	GTAG	NADH:ubiquinone oxidoreductase, 17.2kDa subunit	NADH:ubiquinone oxidoreductase, 17.2kDa subunit; CONTAINS InterPro DOMAIN/s: NADH:ubiquinone oxidoreductase, 17.2kDa subunit (InterPro:IPR007763)	NADH dehydrogenase [ubiquinone] 1 alpha subcomplex subunit 12
9.03344	9.76956	AT3G03120	1	595	GTAG	GTAG	ADP-ribosylation factor B1C	ADP-ribosylation factor B1C (ARFB1C); FUNCTIONS IN: GTP binding; INVOLVED IN: N-terminal protein myristoylation; LOCATED IN: intracellular; EXPRESSED IN: 23 plant structures; EXPRESSED DURING: 13 growth stages; CONTAINS InterPro DOMAIN/s: ADP-ribosylation factor (InterPro:IPR006688), Small GTP-binding protein (InterPro:IPR005225), ARF/SAR superfamily (InterPro:IPR006689); BEST Arabidopsis thalian…	P-loop containing nucleoside triphosphate hydrolase | Small GTP-binding protein domain | Small GTPase superfamily, ARF type | Small GTPase superfamily, ARF/SAR type
6.98932	9.74458	AT3G03300	17	106	GTAG	GTAG	dicer-like 2	dicer-like 2 (DCL2); FUNCTIONS IN: in 7 functions; INVOLVED IN: defense response to virus, maintenance of DNA methylation, production of ta-siRNAs involved in RNA interference; LOCATED IN: intracellular; EXPRESSED IN: 22 plant structures; EXPRESSED IN: 23 plant structures; EXPRESSED DURING: 13 growth stages; CONTAINS InterPro DOMAIN/s: DNA/RNA helicase, DEAD/DEAH box type, N-terminal (InterPro:IP…	DEAD/DEAH box helicase domain | Dicer dimerisation domain | Double-stranded RNA-binding domain | Helicase, C-terminal | Helicase, superfamily 1/2, ATP-binding domain | P-loop containing nucleoside triphosphate hydrolase | PAZ domain | Ribonuclease III domain
24.0714	31.0082	AT3G03560	10	106	GTAG	GTAG		unknown protein; LOCATED IN: plasma membrane; EXPRESSED IN: 22 plant structures; EXPRESSED DURING: 13 growth stages; BEST Arabidopsis thaliana protein match is: unknown protein (TAIR:AT5G23490.1)
5.89412	8.2789	AT3G03650	1	106	GTAG	GTAG	Exostosin family protein	embryo sac development arrest 5 (EDA5); FUNCTIONS IN: catalytic activity; INVOLVED IN: megagametogenesis, pollen tube development; LOCATED IN: membrane; CONTAINS InterPro DOMAIN/s: Exostosin-like (InterPro:IPR004263); BEST Arabidopsis thaliana protein match is: exostosin family protein (TAIR:AT3G45400.1)	Exostosin-like
7.83896	9.81724	AT3G03900	3	93	GCAG	GCAG	adenosine-5'-phosphosulfate (APS) kinase 3	adenosine-5'-phosphosulfate (APS) kinase 3 (APK3); FUNCTIONS IN: transferase activity, transferring phosphorus-containing groups, kinase activity, ATP binding; INVOLVED IN: male gamete generation, sulfate assimilation; LOCATED IN: cytosol; EXPRESSED IN: 27 plant structures; EXPRESSED DURING: 15 growth stages; CONTAINS InterPro DOMAIN/s: Adenylylsulphate kinase, C-terminal (InterPro:IPR002891); BE…	Adenylylsulphate kinase | P-loop containing nucleoside triphosphate hydrolase
3.11458	3.23052	AT3G04240	9	269	GTAG	GTAG	Tetratricopeptide repeat (TPR)-like superfamily protein	secret agent (SEC); CONTAINS InterPro DOMAIN/s: Tetratricopeptide TPR-1 (InterPro:IPR001440), Tetratricopeptide-like helical (InterPro:IPR011990), Tetratricopeptide repeat-containing (InterPro:IPR013026), Tetratricopeptide repeat (InterPro:IPR019734); BEST Arabidopsis thaliana protein match is: Tetratricopeptide repeat (TPR)-like superfamily protein (TAIR:AT3G11540.1)	O-GlcNAc transferase, C-terminal | Tetratricopeptide TPR1 | Tetratricopeptide repeat | Tetratricopeptide repeat-containing domain | Tetratricopeptide-like helical domain
11.4969	8.75597	AT3G04260	2	86	GCAG	GCAG	plastid transcriptionally active 3	plastid transcriptionally active 3 (PTAC3); FUNCTIONS IN: DNA binding, nucleic acid binding; LOCATED IN: plastid chromosome, nucleus, chloroplast, nucleoid, membrane; EXPRESSED IN: 22 plant structures; EXPRESSED DURING: 13 growth stages; CONTAINS InterPro DOMAIN/s: DNA-binding SAP (InterPro:IPR003034); BEST Arabidopsis thaliana protein match is: genomes uncoupled 1 (TAIR:AT2G31400.1)	Pentatricopeptide repeat | SAP domain
2.36023	4.62877	AT3G04810	14	93	GTAG	GTAG	NIMA-related kinase 2	NIMA-related kinase 2 (NEK2); FUNCTIONS IN: protein serine/threonine kinase activity, protein kinase activity, kinase activity, ATP binding; INVOLVED IN: protein amino acid phosphorylation; LOCATED IN: cellular_component unknown; EXPRESSED IN: 24 plant structures; EXPRESSED DURING: 14 growth stages; CONTAINS InterPro DOMAIN/s: Protein kinase, ATP binding site (InterPro:IPR017441), Protein kinase,…	Protein kinase domain | Protein kinase, ATP binding site | Protein kinase-like domain | Serine/threonine-protein kinase, active site | Serine/threonine/dual specificity protein kinase, catalytic domain
24.9186	16.3113	AT3G04920	2	93	GTAG	GTAG	Ribosomal protein S24e family protein	Ribosomal protein S24e family protein; FUNCTIONS IN: structural constituent of ribosome, nucleotide binding; INVOLVED IN: translation, ribosome biogenesis; LOCATED IN: in 7 components; EXPRESSED IN: 26 plant structures; EXPRESSED DURING: 13 growth stages; CONTAINS InterPro DOMAIN/s: Ribosomal protein S24e (InterPro:IPR001976), Nucleotide-binding, alpha-beta plait (InterPro:IPR012677), Ribosomal S…	Nucleotide-binding, alpha-beta plait | Ribosomal S24e conserved site | Ribosomal protein L23/L15e core domain | Ribosomal protein S24e
23.4314	93.0277	AT3G04940	3	117	GTAG	GTAG	cysteine synthase D1	cysteine synthase D1 (CYSD1); CONTAINS InterPro DOMAIN/s: Cysteine synthase/cystathionine beta-synthase P-phosphate-binding site (InterPro:IPR001216), Cysteine synthase A (InterPro:IPR005859), Pyridoxal phosphate-dependent enzyme, beta subunit (InterPro:IPR001926), Cysteine synthase K/M (InterPro:IPR005856); BEST Arabidopsis thaliana protein match is: cysteine synthase D2 (TAIR:AT5G28020.6)	Cysteine synthase A | Cysteine synthase K/M | Cysteine synthase/cystathionine beta-synthase, pyridoxal-phosphate attachment site | Tryptophan synthase beta subunit-like PLP-dependent enzyme
4.35137	36.0236	AT3G05090	6	94	GTAG	GTAG	Transducin/WD40 repeat-like superfamily protein	LATERAL ROOT STIMULATOR 1 (LRS1); FUNCTIONS IN: nucleotide binding; INVOLVED IN: lateral root formation; LOCATED IN: CUL4 RING ubiquitin ligase complex; EXPRESSED IN: 23 plant structures; EXPRESSED DURING: 13 growth stages; CONTAINS InterPro DOMAIN/s: WD40 repeat 2 (InterPro:IPR019782), Protein of unknown function DUF3337 (InterPro:IPR021772), WD40 repeat, conserved site (InterPro:IPR019775), WD4…	G-protein beta WD-40 repeat | Protein of unknown function DUF3337 | WD40 repeat | WD40 repeat, conserved site | WD40-repeat-containing domain | WD40/YVTN repeat-like-containing domain
14.1314	19.5742	AT3G05160	14	88	GTAG	GTAG	Major facilitator superfamily protein	Major facilitator superfamily protein; FUNCTIONS IN: carbohydrate transmembrane transporter activity, sugar:hydrogen symporter activity; INVOLVED IN: transport, transmembrane transport; LOCATED IN: endomembrane system, integral to membrane, membrane; LOCATED IN: integral to membrane, membrane; CONTAINS InterPro DOMAIN/s: Sugar transporter, conserved site (InterPro:IPR005829), Major facilitator su…	General substrate transporter | Major facilitator superfamily domain | Major facilitator superfamily domain, general substrate transporter | Sugar transporter, conserved site | Sugar/inositol transporter
5.12766	3.53142	AT3G05380	17	156	GTAG	GTAG	DIRP ;Myb-like DNA-binding domain	ALWAYS EARLY 2 (ALY2); CONTAINS InterPro DOMAIN/s: DIRP (InterPro:IPR010561); FUNCTIONS IN: DNA binding, sequence-specific DNA binding transcription factor activity; FUNCTIONS IN: DNA binding, sequence-specific DNA binding transcription factor activity, nucleic acid binding; CONTAINS InterPro DOMAIN/s: SANT, DNA-binding (InterPro:IPR001005), DIRP (InterPro:IPR010561); CONTAINS InterPro DOMAIN/s: …	Homeodomain-like | Protein LIN-9/Protein ALWAYS EARLY | SANT/Myb domain
6.04645	33.1035	AT3G05470	2	67	GTAG	GTAG	Actin-binding FH2 (formin homology 2) family protein	Actin-binding FH2 (formin homology 2) family protein; FUNCTIONS IN: actin binding; INVOLVED IN: cellular component organization, actin cytoskeleton organization; LOCATED IN: endomembrane system; EXPRESSED IN: 20 plant structures; EXPRESSED DURING: 11 growth stages; CONTAINS InterPro DOMAIN/s: Actin-binding FH2/DRF autoregulatory (InterPro:IPR003104), Actin-binding FH2 (InterPro:IPR015425); BEST A…	Formin, FH2 domain
4.11691	3.8704	AT3G05970	13	153	GTAG	GTAG	long-chain acyl-CoA synthetase 6	long-chain acyl-CoA synthetase 6 (LACS6); FUNCTIONS IN: long-chain fatty acid-CoA ligase activity; INVOLVED IN: long-chain fatty acid metabolic process; LOCATED IN: membrane; EXPRESSED IN: 24 plant structures; EXPRESSED DURING: 16 growth stages; CONTAINS InterPro DOMAIN/s: AMP-binding, conserved site (InterPro:IPR020845), AMP-dependent synthetase/ligase (InterPro:IPR000873); BEST Arabidopsis thal…	AMP-binding, conserved site | AMP-dependent synthetase/ligase
8.09339	7.8058	AT3G05970	6	90	GTAG	GTAG	long-chain acyl-CoA synthetase 6	long-chain acyl-CoA synthetase 6 (LACS6); FUNCTIONS IN: long-chain fatty acid-CoA ligase activity; INVOLVED IN: long-chain fatty acid metabolic process; LOCATED IN: membrane; EXPRESSED IN: 24 plant structures; EXPRESSED DURING: 16 growth stages; CONTAINS InterPro DOMAIN/s: AMP-binding, conserved site (InterPro:IPR020845), AMP-dependent synthetase/ligase (InterPro:IPR000873); BEST Arabidopsis thal…	AMP-binding, conserved site | AMP-dependent synthetase/ligase
4.87281	4.56439	AT3G06380	3	73	GTAG	GTAG	tubby-like protein 9	tubby-like protein 9 (TLP9); CONTAINS InterPro DOMAIN/s: F-box domain, cyclin-like (InterPro:IPR001810), F-box domain, Skp2-like (InterPro:IPR022364), Tubby, C-terminal, conserved site (InterPro:IPR018066), Tubby, C-terminal (InterPro:IPR000007); BEST Arabidopsis thaliana protein match is: tubby like protein 11 (TAIR:AT5G18680.1)	F-box domain | Tubby C-terminal-like domain | Tubby, C-terminal | Tubby, C-terminal, conserved site
5.40749	4.90329	AT3G06400	19	90	GTAG	GTAG	chromatin-remodeling protein 11	chromatin-remodeling protein 11 (CHR11); FUNCTIONS IN: in 7 functions; INVOLVED IN: cell growth, embryo sac development; LOCATED IN: nucleus, chromatin remodeling complex; EXPRESSED IN: 24 plant structures; EXPRESSED IN: 25 plant structures; EXPRESSED DURING: 15 growth stages; CONTAINS InterPro DOMAIN/s: ATPase, nucleosome remodelling ISWI, HAND domain (InterPro:IPR015194), SANT, eukarya (InterPr…	Helicase, C-terminal | Helicase, superfamily 1/2, ATP-binding domain | Homeodomain-like | ISWI HAND domain | P-loop containing nucleoside triphosphate hydrolase | SANT domain | SANT/Myb domain | SLIDE domain | SNF2-related
2.69366	2.1	AT3G06450	9	117	GTAG	GTAG	HCO3- transporter family	HCO3- transporter family; FUNCTIONS IN: anion exchanger activity; INVOLVED IN: anion transport; LOCATED IN: plasma membrane; EXPRESSED IN: 23 plant structures; EXPRESSED DURING: 13 growth stages; CONTAINS InterPro DOMAIN/s: Bicarbonate transporter, eukaryotic (InterPro:IPR003020), Bicarbonate transporter, C-terminal (InterPro:IPR011531); BEST Arabidopsis thaliana protein match is: HCO3- transport…	Bicarbonate transporter, C-terminal | Bicarbonate transporter, eukaryotic
5.56562	4.69536	AT3G06540	1	75	GTAG	GTAG	Rab escort protein	Rab escort protein (REP); FUNCTIONS IN: RAB GDP-dissociation inhibitor activity; INVOLVED IN: intracellular protein transport, regulation of GTPase activity, protein transport; LOCATED IN: cellular_component unknown; EXPRESSED IN: 22 plant structures; EXPRESSED DURING: 13 growth stages; CONTAINS InterPro DOMAIN/s: Rab GTPase activator (InterPro:IPR002005), Rab protein geranylgeranyltransferase co…	GDP dissociation inhibitor | Rab protein geranylgeranyltransferase component A, eukaryota | Yeast Mrs6p protein
2.51364	4.89325	AT3G06580	6	88	GTAG	GTAG	Mevalonate/galactokinase family protein	GALK; FUNCTIONS IN: ATP binding, galactokinase activity; INVOLVED IN: galactose metabolic process, carbohydrate phosphorylation; LOCATED IN: cytoplasm; EXPRESSED IN: 26 plant structures; EXPRESSED DURING: 15 growth stages; CONTAINS InterPro DOMAIN/s: GHMP kinase, ATP-binding, conserved site (InterPro:IPR006203), GHMP kinase (InterPro:IPR006204), Galactokinase (InterPro:IPR000705), Mevalonate/gala…	GHMP kinase N-terminal domain | GHMP kinase, ATP-binding, conserved site | GHMP kinase, C-terminal domain | Galactokinase | Galactokinase galactose-binding domain | Galactokinase, conserved site | Mevalonate/galactokinase | Ribosomal protein S5 domain 2-type fold | Ribosomal protein S5 domain 2-type fold, subgroup
4.56691	2.43264	AT3G06580	7	92	GTAG	GTAG	Mevalonate/galactokinase family protein	GALK; FUNCTIONS IN: ATP binding, galactokinase activity; INVOLVED IN: galactose metabolic process, carbohydrate phosphorylation; LOCATED IN: cytoplasm; EXPRESSED IN: 26 plant structures; EXPRESSED DURING: 15 growth stages; CONTAINS InterPro DOMAIN/s: GHMP kinase, ATP-binding, conserved site (InterPro:IPR006203), GHMP kinase (InterPro:IPR006204), Galactokinase (InterPro:IPR000705), Mevalonate/gala…	GHMP kinase N-terminal domain | GHMP kinase, ATP-binding, conserved site | GHMP kinase, C-terminal domain | Galactokinase | Galactokinase galactose-binding domain | Galactokinase, conserved site | Mevalonate/galactokinase | Ribosomal protein S5 domain 2-type fold | Ribosomal protein S5 domain 2-type fold, subgroup
28.055	24.0196	AT3G06650	13	87	GTAG	GTAG	ATP-citrate lyase B-1	ATP-citrate lyase B-1 (ACLB-1); FUNCTIONS IN: ATP citrate synthase activity; INVOLVED IN: acetyl-CoA biosynthetic process; LOCATED IN: citrate lyase complex, membrane; EXPRESSED IN: 23 plant structures; EXPRESSED DURING: 14 growth stages; CONTAINS InterPro DOMAIN/s: Succinyl-CoA synthetase, beta subunit, conserved site (InterPro:IPR017866), Citrate synthase-like, small alpha subdomain (InterPro:I…	ATP-citrate lyase/succinyl-CoA ligase | ATP-citrate lyase/succinyl-CoA ligase, active site | Citrate synthase-like | Citrate synthase-like, core | Citrate synthase-like, large alpha subdomain | Citrate synthase-like, small alpha subdomain | CoA-binding | NAD(P)-binding domain | Succinyl-CoA ligase, alpha subunit | Succinyl-CoA synthetase, beta subunit, conserved site | Succinyl-CoA synthetase-like
22.7465	28.2879	AT3G06860	9	128	GTAG	GTAG	multifunctional protein 2	multifunctional protein 2 (MFP2); FUNCTIONS IN: enoyl-CoA hydratase activity, 3-hydroxyacyl-CoA dehydrogenase activity; INVOLVED IN: fatty acid beta-oxidation; LOCATED IN: nucleolus, cell wall, peroxisome; EXPRESSED IN: 24 plant structures; EXPRESSED DURING: 14 growth stages; CONTAINS InterPro DOMAIN/s: Enoyl-CoA hydratase/isomerase, conserved site (InterPro:IPR018376), 3-hydroxyacyl-CoA dehydrog…	3-hydroxyacyl-CoA dehydrogenase, C-terminal | 3-hydroxyacyl-CoA dehydrogenase, NAD binding | 3-hydroxyacyl-CoA dehydrogenase, conserved site | 6-phosphogluconate dehydrogenase, C-terminal-like | ClpP/crotonase-like domain | Crotonase superfamily | Dehydrogenase, multihelical | Enoyl-CoA hydratase/isomerase, conserved site | NAD(P)-binding domain
40.9584	10.963	AT3G07060	11	91	GTAG	GTAG	NHL domain-containing protein	embryo defective 1974 (emb1974); CONTAINS InterPro DOMAIN/s: Six-bladed beta-propeller, TolB-like (InterPro:IPR011042); BEST Arabidopsis thaliana protein match is: haloacid dehalogenase-like hydrolase family protein (TAIR:AT1G56500.1)	Six-bladed beta-propeller, TolB-like
2.6708	2.4764	AT3G07300	6	498	GTAG	GTAG	NagB/RpiA/CoA transferase-like superfamily protein	NagB/RpiA/CoA transferase-like superfamily protein; FUNCTIONS IN: GTP binding, translation initiation factor activity; INVOLVED IN: translational initiation, cellular metabolic process; LOCATED IN: eukaryotic translation initiation factor 2B complex; EXPRESSED IN: 24 plant structures; EXPRESSED DURING: 15 growth stages; CONTAINS InterPro DOMAIN/s: Initiation factor 2B related (InterPro:IPR000649)…	Initiation factor 2B-related
15.1728	8.28783	AT3G07740	4	87	GTAG	GTAG	homolog of yeast ADA2 2A	homolog of yeast ADA2 2A (ADA2A); FUNCTIONS IN: DNA binding, sequence-specific DNA binding transcription factor activity; FUNCTIONS IN: DNA binding, sequence-specific DNA binding transcription factor activity, zinc ion binding; INVOLVED IN: response to cold; EXPRESSED IN: 14 plant structures; EXPRESSED DURING: 7 growth stages; CONTAINS InterPro DOMAIN/s: SANT, DNA-binding (InterPro:IPR001005), Tr…	Homeodomain-like | SANT domain | SANT/Myb domain | SWIRM domain | Transcriptional adaptor 2 | Zinc finger, ZZ-type
14.6668	321.176	AT3G08505	6	77	GTAG	GTAG	zinc finger (CCCH-type/C3HC4-type RING finger) family protein	zinc finger (CCCH-type/C3HC4-type RING finger) family protein; FUNCTIONS IN: zinc ion binding, nucleic acid binding; CONTAINS InterPro DOMAIN/s: Zinc finger, CCCH-type (InterPro:IPR000571), Zinc finger, RING-type, conserved site (InterPro:IPR017907), Zinc finger, RING-type (InterPro:IPR001841), Zinc finger, C3HC4 RING-type (InterPro:IPR018957)	Zinc finger, C3HC4 RING-type | Zinc finger, CCCH-type | Zinc finger, RING-type | Zinc finger, RING-type, conserved site | Zinc finger, RING/FYVE/PHD-type
4.6842	4.00726	AT3G08510	4	88	GTAG	GTAG	phospholipase C 2	phospholipase C 2; phospholipase C 2 (PLC2); FUNCTIONS IN: phospholipase C activity; INVOLVED IN: signal transduction, intracellular signaling pathway, lipid metabolic process; EXPRESSED IN: 25 plant structures; LOCATED IN: plasma membrane; EXPRESSED DURING: 15 growth stages; EXPRESSED IN: 27 plant structures; CONTAINS InterPro DOMAIN/s: Phospholipase C, phosphoinositol-specific, EF-hand-like (In…	C2 domain | EF-hand domain pair | PLC-like phosphodiesterase, TIM beta/alpha-barrel domain | Phosphoinositide phospholipase C family | Phospholipase C, phosphatidylinositol-specific , X domain | Phospholipase C, phosphatidylinositol-specific, Y domain | Phospholipase C, phosphoinositol-specific, EF-hand-like
63.1802	26.6893	AT3G08530	9	84	GTAG	GTAG	Clathrin, heavy chain	Clathrin, heavy chain; FUNCTIONS IN: structural molecule activity, binding; INVOLVED IN: intracellular protein transport, vesicle-mediated transport; LOCATED IN: plasma membrane, chloroplast, membrane; EXPRESSED IN: guard cell, leaf; EXPRESSED DURING: seedling growth; CONTAINS InterPro DOMAIN/s: Clathrin, heavy chain (InterPro:IPR016341), Clathrin, heavy chain, linker/propeller domain (InterPro:I…	Armadillo-type fold | Clathrin, heavy chain | Clathrin, heavy chain, linker, core motif | Clathrin, heavy chain, linker/propeller domain | Clathrin, heavy chain, propeller repeat | Clathrin, heavy chain, propeller, N-terminal | Clathrin, heavy chain/VPS, 7-fold repeat | Tetratricopeptide-like helical domain
2.99096	3.89743	AT3G08610	2	136	GTAG	GTAG		unknown protein	NADH dehydrogenase [ubiquinone] (complex I), alpha subcomplex subunit 1
10.1761	4.6655	AT3G08730	1	127	GTAG	GTAG	protein-serine kinase 1	protein-serine kinase 1 (PK1); CONTAINS InterPro DOMAIN/s: Protein kinase, ATP binding site (InterPro:IPR017441), Serine/threonine-protein kinase domain (InterPro:IPR002290), Serine/threonine-protein kinase-like domain (InterPro:IPR017442), Protein kinase, C-terminal (InterPro:IPR017892), Protein kinase-like domain (InterPro:IPR011009), Serine/threonine-protein kinase, active site (InterPro:IPR00…	AGC-kinase, C-terminal | Protein kinase domain | Protein kinase, ATP binding site | Protein kinase, C-terminal | Protein kinase-like domain | Serine/threonine-protein kinase, active site | Serine/threonine/dual specificity protein kinase, catalytic domain
3.16877	2.95617	AT3G08880	2	91	ATAC	ATAC		unknown protein; BEST Arabidopsis thaliana protein match is: unknown protein (TAIR:AT5G01570.1)
2.95448	3.11024	AT3G09260	7	98	GTAG	GTAG	Glycosyl hydrolase superfamily protein	PYK10; FUNCTIONS IN: beta-glucosidase activity, copper ion binding, hydrolase activity, hydrolyzing O-glycosyl compounds, fucosidase activity; INVOLVED IN: ER body organization, response to salt stress, response to symbiotic fungus, cellular response to cold, response to osmotic stress; LOCATED IN: peroxisome, nucleus, vacuole, membrane, ER body; EXPRESSED IN: 15 plant structures; EXPRESSED DURIN…	Glycoside hydrolase, catalytic domain | Glycoside hydrolase, family 1 | Glycoside hydrolase, family 1, active site | Glycoside hydrolase, superfamily
6.78224	12.7922	AT3G09300	3	93	GTAG	GTAG	OSBP(oxysterol binding protein)-related protein 3B	OSBP(oxysterol binding protein)-related protein 3B (ORP3B); FUNCTIONS IN: oxysterol binding; INVOLVED IN: steroid metabolic process; EXPRESSED IN: 23 plant structures; EXPRESSED DURING: 15 growth stages; CONTAINS InterPro DOMAIN/s: Oxysterol-binding protein, conserved site (InterPro:IPR018494), Oxysterol-binding protein (InterPro:IPR000648); BEST Arabidopsis thaliana protein match is: Oxysterol-b…	Oxysterol-binding protein | Oxysterol-binding protein, conserved site
5.37367	6.46545	AT3G09320	5	98	GTAG	GTAG	DHHC-type zinc finger family protein	DHHC-type zinc finger family protein; FUNCTIONS IN: zinc ion binding; INVOLVED IN: biological_process unknown; LOCATED IN: endomembrane system; EXPRESSED IN: 24 plant structures; EXPRESSED DURING: 15 growth stages; CONTAINS InterPro DOMAIN/s: Zinc finger, DHHC-type (InterPro:IPR001594); BEST Arabidopsis thaliana protein match is: DHHC-type zinc finger family protein (TAIR:AT5G04270.1)	Zinc finger, DHHC-type, palmitoyltransferase
8.2966	18.8992	AT3G09350	2	89	GTAG	GTAG	Fes1A	Fes1A (Fes1A); CONTAINS InterPro DOMAIN/s: Armadillo-like helical (InterPro:IPR011989), Armadillo-type fold (InterPro:IPR016024); BEST Arabidopsis thaliana protein match is: Fes1B (TAIR:AT3G53800.1); BEST Arabidopsis thaliana protein match is: Fes1C (TAIR:AT5G02150.1)	Armadillo-like helical | Armadillo-type fold
5.72859	3.36984	AT3G09370	1	308	GTAG	GTAG	myb domain protein 3r-3	myb domain protein 3r-3 (MYB3R-3); FUNCTIONS IN: DNA binding, sequence-specific DNA binding transcription factor activity; INVOLVED IN: regulation of transcription, DNA-dependent, regulation of transcription; EXPRESSED IN: 23 plant structures; EXPRESSED DURING: 13 growth stages; CONTAINS InterPro DOMAIN/s: SANT, DNA-binding (InterPro:IPR001005), Homeodomain-like (InterPro:IPR009057), Myb, DNA-bin…	Homeodomain-like | Myb domain | SANT/Myb domain
5.00438	3.43432	AT3G09410	10	79	GTAG	GTAG	Pectinacetylesterase family protein	Pectinacetylesterase family protein; CONTAINS InterPro DOMAIN/s: Pectinacetylesterase (InterPro:IPR004963); BEST Arabidopsis thaliana protein match is: Pectinacetylesterase family protein (TAIR:AT3G09405.1)	Alpha/Beta hydrolase fold | Protein notum homologue
5.99809	4.98254	AT3G09740	4	95	GCAG	GCAG	syntaxin of plants 71	syntaxin of plants 71 (SYP71); FUNCTIONS IN: protein transporter activity; INVOLVED IN: intracellular protein transport, protein targeting to membrane; LOCATED IN: integral to membrane, endoplasmic reticulum, plasma membrane; EXPRESSED IN: 24 plant structures; EXPRESSED DURING: 13 growth stages; CONTAINS InterPro DOMAIN/s: Target SNARE coiled-coil domain (InterPro:IPR000727), Syntaxin/epimorphin,…	Syntaxin/epimorphin, conserved site | Target SNARE coiled-coil domain
9.66532	16.2648	AT3G09740	2	110	GTAG	GTAG	syntaxin of plants 71	syntaxin of plants 71 (SYP71); FUNCTIONS IN: protein transporter activity; INVOLVED IN: intracellular protein transport, protein targeting to membrane; LOCATED IN: integral to membrane, endoplasmic reticulum, plasma membrane; EXPRESSED IN: 24 plant structures; EXPRESSED DURING: 13 growth stages; CONTAINS InterPro DOMAIN/s: Target SNARE coiled-coil domain (InterPro:IPR000727), Syntaxin/epimorphin,…	Syntaxin/epimorphin, conserved site | Target SNARE coiled-coil domain
103.593	8.86614	AT3G09810	2	88	GTAG	GTAG	isocitrate dehydrogenase VI	isocitrate dehydrogenase VI (IDH-VI); CONTAINS InterPro DOMAIN/s: Isocitrate/isopropylmalate dehydrogenase (InterPro:IPR001804), Isocitrate dehydrogenase NAD-dependent, mitochondrial (InterPro:IPR004434), Isocitrate/isopropylmalate dehydrogenase, conserved site (InterPro:IPR019818); BEST Arabidopsis thaliana protein match is: isocitrate dehydrogenase V (TAIR:AT5G03290.1)	Isocitrate and isopropylmalate dehydrogenases family | Isocitrate dehydrogenase NAD-dependent | Isocitrate/isopropylmalate dehydrogenase, conserved site | Isopropylmalate dehydrogenase-like domain
9.57942	9.07194	AT3G10160	7	131	GTAG	GTAG	DHFS-FPGS homolog C	DHFS-FPGS homolog C (DFC); CONTAINS InterPro DOMAIN/s: Mur ligase, central (InterPro:IPR013221), Folylpolyglutamate synthetase, conserved site (InterPro:IPR018109), Mur ligase, C-terminal (InterPro:IPR004101), Folylpolyglutamate synthetase (InterPro:IPR001645); BEST Arabidopsis thaliana protein match is: DHFS-FPGS homolog B (TAIR:AT5G05980.2)	Folylpolyglutamate synthetase | Folylpolyglutamate synthetase, conserved site | Mur ligase, C-terminal | Mur ligase, central
3.95156	4.61188	AT3G10260	1	92	GTAG	GTAG	Reticulon family protein	Reticulon family protein; CONTAINS InterPro DOMAIN/s: Reticulon (InterPro:IPR003388); BEST Arabidopsis thaliana protein match is: Reticulon family protein (TAIR:AT3G61560.1)	Reticulon
11.3754	4.56125	AT3G10360	3	82	GTAG	GTAG	pumilio 4	pumilio 4 (PUM4); FUNCTIONS IN: RNA binding, binding; INVOLVED IN: biological_process unknown; LOCATED IN: cellular_component unknown; EXPRESSED IN: male gametophyte, cultured cell, pollen tube; EXPRESSED DURING: L mature pollen stage, M germinated pollen stage; CONTAINS InterPro DOMAIN/s: Pumilio RNA-binding repeat (InterPro:IPR001313), Nucleic acid binding NABP (InterPro:IPR012940), Armadillo-l…	Armadillo-like helical | Armadillo-type fold | Nucleic acid binding NABP | Pumilio RNA-binding repeat
8.55004	3.79408	AT3G11030	2	118	GTAG	GTAG	TRICHOME BIREFRINGENCE-LIKE 32	TRICHOME BIREFRINGENCE-LIKE 32 (TBL32); CONTAINS InterPro DOMAIN/s: Protein of unknown function DUF231, plant (InterPro:IPR004253); BEST Arabidopsis thaliana protein match is: TRICHOME BIREFRINGENCE-LIKE 33 (TAIR:AT2G40320.1)	PC-Esterase | PMR5 N-terminal domain
5.98505	7.92268	AT3G11210	2	91	GTAG	GTAG	SGNH hydrolase-type esterase superfamily protein	SGNH hydrolase-type esterase superfamily protein; FUNCTIONS IN: hydrolase activity, hydrolase activity, acting on ester bonds, carboxylesterase activity; INVOLVED IN: lipid metabolic process; LOCATED IN: cellular_component unknown; EXPRESSED IN: 20 plant structures; EXPRESSED DURING: 12 growth stages; CONTAINS InterPro DOMAIN/s: Esterase, SGNH hydrolase-type, subgroup (InterPro:IPR013831), Lipase…	Lipase, GDSL | SGNH hydrolase-type esterase domain
3.92894	3.38016	AT3G11230	5	85	GTAG	GTAG	Yippee family putative zinc-binding protein	Yippee family putative zinc-binding protein; FUNCTIONS IN: molecular_function unknown; INVOLVED IN: biological_process unknown; LOCATED IN: endomembrane system; EXPRESSED IN: 22 plant structures; EXPRESSED DURING: 13 growth stages; CONTAINS InterPro DOMAIN/s: Yippee-like protein (InterPro:IPR004910); BEST Arabidopsis thaliana protein match is: Yippee family putative zinc-binding protein (TAIR:AT2…	Yippee/Mis18
6.93464	5.50062	AT3G11440	3	93	GTAG	GTAG	myb domain protein 65	myb domain protein 65 (MYB65); CONTAINS InterPro DOMAIN/s: Transcription factor, GAMYB (InterPro:IPR016310), SANT, DNA-binding (InterPro:IPR001005), Myb, DNA-binding (InterPro:IPR014778), Homeodomain-like (InterPro:IPR009057), Myb transcription factor (InterPro:IPR015495), Homeodomain-related (InterPro:IPR012287), HTH transcriptional regulator, Myb-type, DNA-binding (InterPro:IPR017930); BEST Ara…	Homeodomain-like | Myb domain | SANT/Myb domain | Transcription factor, GAMYB
7.70341	6.8322	AT3G11670	1	5	TGAG	TGAG	UDP-Glycosyltransferase superfamily protein	DIGALACTOSYL DIACYLGLYCEROL DEFICIENT 1 (DGD1); BEST Arabidopsis thaliana protein match is: digalactosyl diacylglycerol deficient 2 (TAIR:AT4G00550.1); CONTAINS InterPro DOMAIN/s: Glycosyl transferase, group 1 (InterPro:IPR001296)
5.8923	4.63145	AT3G11910	4	93	GTAG	GTAG	ubiquitin-specific protease 13	ubiquitin-specific protease 13 (UBP13); FUNCTIONS IN: ubiquitin-specific protease activity, ubiquitin thiolesterase activity; INVOLVED IN: ubiquitin-dependent protein catabolic process; LOCATED IN: cellular_component unknown; EXPRESSED IN: 25 plant structures; EXPRESSED DURING: 15 growth stages; CONTAINS InterPro DOMAIN/s: TRAF-like (InterPro:IPR008974), Peptidase C19, ubiquitin carboxyl-terminal…	ICP0-binding domain of Ubiquitin-specific protease 7 | MATH | Peptidase C19, ubiquitin carboxyl-terminal hydrolase | Peptidase C19, ubiquitin carboxyl-terminal hydrolase, conserved site | TRAF-like | Ubiquitin carboxyl-terminal hydrolase, C-terminal | Ubiquitin carboxyl-terminal hydrolase-like domain
43.3979	19.7767	AT3G12020	19	88	GTAG	GTAG	P-loop containing nucleoside triphosphate hydrolases superfamily protein	P-loop containing nucleoside triphosphate hydrolases superfamily protein; FUNCTIONS IN: microtubule motor activity, ATP binding; INVOLVED IN: microtubule-based movement; EXPRESSED IN: 22 plant structures; EXPRESSED IN: 23 plant structures; EXPRESSED DURING: 13 growth stages; CONTAINS InterPro DOMAIN/s: Kinesin, motor region, conserved site (InterPro:IPR019821), Kinesin, motor domain (InterPro:IPR…	Kinesin, motor domain | Kinesin, motor region, conserved site | Kinesin-like protein | P-loop containing nucleoside triphosphate hydrolase
37.0699	7.04132	AT3G12380	1	88	GTAG	GTAG	actin-related protein 5	actin-related protein 5 (ARP5); CONTAINS InterPro DOMAIN/s: Actin/actin-like (InterPro:IPR004000); BEST Arabidopsis thaliana protein match is: Actin-like ATPase superfamily protein (TAIR:AT2G42100.1)	Actin-related protein | Actin-related protein 5 (Arp5)
3.35486	2.75636	AT3G12490	3	245	GTAG	GTAG	cystatin B	cystatin B (CYSB); FUNCTIONS IN: cysteine-type endopeptidase inhibitor activity, cobalt ion binding; INVOLVED IN: response to abiotic stimulus; LOCATED IN: endomembrane system; EXPRESSED IN: 24 plant structures; CONTAINS InterPro DOMAIN/s: Proteinase inhibitor I25, cystatin, conserved site (InterPro:IPR018073), Proteinase inhibitor I25, cystatin (InterPro:IPR000010), Proteinase inhibitor I25, cys…	Cystatin | Proteinase inhibitor I25, cystatin | Proteinase inhibitor I25, cystatin, conserved region | Proteinase inhibitor I25, cystatin, conserved site
9.1697	3.9104	AT3G12520	13	99	GTAG	GTAG	sulfate transporter 4;2	sulfate transporter 4;2 (SULTR4;2); FUNCTIONS IN: sulfate transmembrane transporter activity; INVOLVED IN: sulfate transport, transport, transmembrane transport; LOCATED IN: integral to membrane, membrane; EXPRESSED IN: 22 plant structures; EXPRESSED DURING: 13 growth stages; CONTAINS InterPro DOMAIN/s: Sulphate transporter (InterPro:IPR011547), Sulphate transporter/antisigma-factor antagonist ST…	STAS domain | Sulphate anion transporter | Sulphate anion transporter, conserved site | Sulphate transporter
17.0053	5.10229	AT3G12550	6	191	GTAG	GTAG	XH/XS domain-containing protein	XH/XS domain-containing protein; FUNCTIONS IN: molecular_function unknown; INVOLVED IN: biological_process unknown; LOCATED IN: cellular_component unknown; EXPRESSED IN: 20 plant structures; EXPRESSED DURING: 10 growth stages; CONTAINS InterPro DOMAIN/s: Domain of unknown function XS (InterPro:IPR005380), Domain of unknown function XH (InterPro:IPR005379), Domain of unknown function, putative Zin…	Uncharacterised domain XH | XS domain | Zinc finger-XS domain
27.3841	6.90266	AT3G12590	13	178	GTAG	GTAG		unknown protein; INVOLVED IN: biological_process unknown; LOCATED IN: chloroplast
3.07751	3.98115	AT3G12685	4	79	GTAG	GTAG	Acid phosphatase/vanadium-dependent haloperoxidase-related protein	Acid phosphatase/vanadium-dependent haloperoxidase-related protein; CONTAINS InterPro DOMAIN/s: Acid phosphatase/vanadium-dependent haloperoxidase related (InterPro:IPR003832); BEST Arabidopsis thaliana protein match is: Acid phosphatase/vanadium-dependent haloperoxidase-related protein (TAIR:AT1G24350.1)	Acid phosphatase/vanadium-dependent haloperoxidase-related
12.6615	10.9322	AT3G12780	2	231	GTAG	GTAG	phosphoglycerate kinase 1	phosphoglycerate kinase 1 (PGK1); FUNCTIONS IN: phosphoglycerate kinase activity; INVOLVED IN: response to cadmium ion, response to cold, glycolysis, peptidyl-cysteine S-nitrosylation; LOCATED IN: in 11 components; EXPRESSED IN: 26 plant structures; EXPRESSED DURING: 15 growth stages; CONTAINS InterPro DOMAIN/s: Phosphoglycerate kinase, N-terminal (InterPro:IPR015824), Phosphoglycerate kinase (In…	Phosphoglycerate kinase | Phosphoglycerate kinase, C-terminal | Phosphoglycerate kinase, N-terminal | Phosphoglycerate kinase, conserved site
21.5102	13.4398	AT3G12810	7	301	GTAG	GTAG	SNF2 domain-containing protein / helicase domain-containing protein	PHOTOPERIOD-INDEPENDENT EARLY FLOWERING 1 (PIE1); FUNCTIONS IN: helicase activity, DNA binding, ATP binding, nucleic acid binding; INVOLVED IN: in 6 processes; LOCATED IN: SWI/SNF complex, cell wall, chromatin remodeling complex; EXPRESSED IN: 18 plant structures; EXPRESSED DURING: 9 growth stages; CONTAINS InterPro DOMAIN/s: HSA (InterPro:IPR006562), HAS subgroup (InterPro:IPR013999), Helicase/S…	HAS subgroup | Helicase, C-terminal | Helicase, superfamily 1/2, ATP-binding domain | Helicase/SANT-associated, DNA binding | Homeodomain-like | Myb-like domain | P-loop containing nucleoside triphosphate hydrolase | SANT/Myb domain | SNF2-related
4.80885	12.4034	AT3G12950	1	98	GTAG	GTAG	Trypsin family protein	Trypsin family protein; FUNCTIONS IN: catalytic activity; INVOLVED IN: biological_process unknown; LOCATED IN: cellular_component unknown; EXPRESSED IN: 21 plant structures; EXPRESSED DURING: 9 growth stages; CONTAINS InterPro DOMAIN/s: Serine/cysteine peptidase, trypsin-like (InterPro:IPR009003); BEST Arabidopsis thaliana protein match is: Trypsin family protein (TAIR:AT5G45030.2)	Trypsin-like cysteine/serine peptidase domain
28.14	14.7516	AT3G13040	7	513	GTAG	GTAG	myb-like HTH transcriptional regulator family protein	myb-like HTH transcriptional regulator family protein; CONTAINS InterPro DOMAIN/s: Homeodomain-like (InterPro:IPR009057), Myb, DNA-binding (InterPro:IPR014778), HTH transcriptional regulator, Myb-type, DNA-binding (InterPro:IPR017930), Myb-like DNA-binding domain, SHAQKYF class (InterPro:IPR006447), Homeodomain-related (InterPro:IPR012287); BEST Arabidopsis thaliana protein match is: phosphate st…	Homeodomain-like | MYB-CC type transcription factor, LHEQLE-containing domain | Myb domain | Myb domain, plants | SANT/Myb domain
3.09789	2.58538	AT3G13062	4	159	GCAG	GCAG	Polyketide cyclase/dehydrase and lipid transport superfamily protein	Polyketide cyclase/dehydrase and lipid transport superfamily protein; CONTAINS InterPro DOMAIN/s: Lipid-binding START (InterPro:IPR002913); BEST Arabidopsis thaliana protein match is: Polyketide cyclase/dehydrase and lipid transport superfamily protein (TAIR:AT1G55960.1)	START domain | START-like domain
6.47845	6.27891	AT3G13200	3	94	GTAG	GTAG	Cwf15 / Cwc15 cell cycle control family protein	EMBRYO DEFECTIVE 2769 (EMB2769); FUNCTIONS IN: molecular_function unknown; INVOLVED IN: nuclear mRNA splicing, via spliceosome; LOCATED IN: spliceosomal complex; EXPRESSED IN: 24 plant structures; EXPRESSED DURING: 15 growth stages; CONTAINS InterPro DOMAIN/s: Cwf15/Cwc15 cell cycle control protein (InterPro:IPR006973)	Pre-mRNA-splicing factor Cwf15/Cwc15
11.1955	131.011	AT3G13290	5	146	GTAG	GTAG	varicose-related	varicose-related (VCR); FUNCTIONS IN: nucleotide binding; LOCATED IN: cellular_component unknown; EXPRESSED IN: male gametophyte, cultured cell, pollen tube; EXPRESSED DURING: L mature pollen stage, M germinated pollen stage; CONTAINS InterPro DOMAIN/s: WD40 repeat-like-containing domain (InterPro:IPR011046), WD40 repeat 2 (InterPro:IPR019782), WD40-repeat-containing domain (InterPro:IPR017986), …	WD40 repeat | WD40-repeat-containing domain | WD40/YVTN repeat-like-containing domain
2.67363	3.74135	AT3G13350	5	475	GTAG	GTAG	HMG (high mobility group) box protein with ARID/BRIGHT DNA-binding domain	HMG (high mobility group) box protein with ARID/BRIGHT DNA-binding domain; FUNCTIONS IN: sequence-specific DNA binding transcription factor activity; LOCATED IN: nucleus, intracellular; EXPRESSED IN: 24 plant structures; EXPRESSED DURING: 14 growth stages; CONTAINS InterPro DOMAIN/s: High mobility group, superfamily (InterPro:IPR009071), High mobility group, HMG1/HMG2 (InterPro:IPR000910), ARID/B…	ARID/BRIGHT DNA-binding domain | High mobility group box domain
3.26094	2.18877	AT3G13445	7	105	GTAG	GTAG	TATA binding protein 1	TATA binding protein 1 (TBP1); FUNCTIONS IN: RNA polymerase II transcription factor activity, binding, DNA binding; INVOLVED IN: transcription initiation from RNA polymerase II promoter, regulation of transcription, DNA-dependent; EXPRESSED IN: 24 plant structures; EXPRESSED DURING: 15 growth stages; CONTAINS InterPro DOMAIN/s: TATA-box binding (InterPro:IPR000814), Beta2-adaptin/TATA-box binding…	Beta2-adaptin/TBP, C-terminal domain | TATA-box binding protein
4.66431	4.30417	AT3G13690	5	135	GTAG	GTAG	Protein kinase protein with adenine nucleotide alpha hydrolases-like domain	Protein kinase protein with adenine nucleotide alpha hydrolases-like domain; FUNCTIONS IN: protein tyrosine kinase activity, protein kinase activity, kinase activity, ATP binding; INVOLVED IN: protein amino acid phosphorylation; LOCATED IN: cellular_component unknown; EXPRESSED IN: 23 plant structures; EXPRESSED DURING: 13 growth stages; CONTAINS InterPro DOMAIN/s: Protein kinase, catalytic domai…	Concanavalin A-like lectin/glucanase, subgroup | Protein kinase domain | Protein kinase-like domain | Rossmann-like alpha/beta/alpha sandwich fold | Serine-threonine/tyrosine-protein kinase catalytic domain | Tyrosine-protein kinase, active site
25.5759	47.8676	AT3G13870	13	132	GTAG	GTAG	Root hair defective 3 GTP-binding protein (RHD3)	ROOT HAIR DEFECTIVE 3 (RHD3); FUNCTIONS IN: GTP binding; INVOLVED IN: root epidermal cell differentiation, plant-type cell wall biogenesis, ER to Golgi vesicle-mediated transport, actin cytoskeleton organization, cell tip growth; LOCATED IN: endoplasmic reticulum, plasma membrane, cytoplasm; EXPRESSED IN: 25 plant structures; EXPRESSED DURING: 14 growth stages; CONTAINS InterPro DOMAIN/s: Root ha…	P-loop containing nucleoside triphosphate hydrolase | RHD3/Sey1
6.70268	6.77718	AT3G14210	1	115	GTAG	GTAG	epithiospecifier modifier 1	epithiospecifier modifier 1 (ESM1); FUNCTIONS IN: hydrolase activity, acting on ester bonds, carboxylesterase activity; INVOLVED IN: glucosinolate catabolic process, response to cold, defense response to bacterium, response to insect; LOCATED IN: in 8 components; EXPRESSED IN: 21 plant structures; EXPRESSED DURING: 14 growth stages; CONTAINS InterPro DOMAIN/s: Lipase, GDSL (InterPro:IPR001087); B…	Lipase, GDSL | SGNH hydrolase-type esterase domain
3.17808	5.58006	AT3G14400	7	172	GTAG	GTAG	ubiquitin-specific protease 25	ubiquitin-specific protease 25 (UBP25); FUNCTIONS IN: ubiquitin-specific protease activity, ubiquitin thiolesterase activity; INVOLVED IN: ubiquitin-dependent protein catabolic process; EXPRESSED IN: 24 plant structures; EXPRESSED DURING: 15 growth stages; CONTAINS InterPro DOMAIN/s: Peptidase C19, ubiquitin carboxyl-terminal hydrolase 2, conserved site (InterPro:IPR018200), Peptidase C19, ubiqui…	Peptidase C19, ubiquitin carboxyl-terminal hydrolase | Peptidase C19, ubiquitin carboxyl-terminal hydrolase, conserved site | Ubiquitin carboxyl-terminal hydrolase-like domain
7.89566	5.52	AT3G14840	21	101	GTAG	GTAG	Leucine-rich repeat transmembrane protein kinase	Leucine-rich repeat transmembrane protein kinase; FUNCTIONS IN: protein kinase activity, ATP binding; FUNCTIONS IN: protein serine/threonine kinase activity, protein kinase activity, ATP binding; INVOLVED IN: protein amino acid phosphorylation; LOCATED IN: plasma membrane; EXPRESSED IN: 25 plant structures; EXPRESSED DURING: 14 growth stages; BEST Arabidopsis thaliana protein match is: Leucine-ri…	Concanavalin A-like lectin/glucanase, subgroup | Leucine-rich repeat | Malectin | Protein kinase domain | Protein kinase-like domain | Serine-threonine/tyrosine-protein kinase catalytic domain | Serine/threonine-protein kinase, active site
7.69506	10.5906	AT3G14910	6	78	GTAG	GTAG		unknown protein	Rab3-GAP regulatory subunit
3.03976	2.36601	AT3G15160	12	65	GTAG	GTAG		unknown protein	AP-5 complex subunit zeta-1 | Armadillo-like helical | Armadillo-type fold
2.36375	2.38514	AT3G15351	1	594	GTAG	GTAG		unknown protein; FUNCTIONS IN: molecular_function unknown; INVOLVED IN: biological_process unknown; LOCATED IN: cellular_component unknown; EXPRESSED IN: 23 plant structures; EXPRESSED DURING: 13 growth stages
5.13121	4.14734	AT3G15355	3	85	GTAG	GTAG	ubiquitin-conjugating enzyme 25	ubiquitin-conjugating enzyme 25 (UBC25); FUNCTIONS IN: small conjugating protein ligase activity; INVOLVED IN: regulation of protein metabolic process, post-translational protein modification; LOCATED IN: cellular_component unknown; EXPRESSED IN: 21 plant structures; EXPRESSED DURING: 13 growth stages; CONTAINS InterPro DOMAIN/s: Ubiquitin-conjugating enzyme/RWD-like (InterPro:IPR016135), Ubiquit…	Ubiquitin-conjugating enzyme, E2 | Ubiquitin-conjugating enzyme/RWD-like
6.14681	6.881	AT3G15410	17	86	GTAG	GTAG	Leucine-rich repeat (LRR) family protein	Leucine-rich repeat (LRR) family protein; CONTAINS InterPro DOMAIN/s: Leucine-rich repeat-containing protein (InterPro:IPR015766), Leucine-rich repeat, typical subtype (InterPro:IPR003591), Leucine-rich repeat (InterPro:IPR001611); BEST Arabidopsis thaliana protein match is: Leucine-rich repeat receptor-like protein kinase family protein (TAIR:AT3G24240.1)	Leucine rich repeat 4 | Leucine-rich repeat | Leucine-rich repeat, typical subtype
12.2029	11.1499	AT3G15520	10	87	GCAG	GCAG	Cyclophilin-like peptidyl-prolyl cis-trans isomerase family protein	Cyclophilin-like peptidyl-prolyl cis-trans isomerase family protein; FUNCTIONS IN: peptidyl-prolyl cis-trans isomerase activity; INVOLVED IN: protein folding; LOCATED IN: thylakoid, thylakoid lumen, chloroplast thylakoid membrane, chloroplast thylakoid lumen, chloroplast; EXPRESSED IN: 22 plant structures; EXPRESSED DURING: 14 growth stages; CONTAINS InterPro DOMAIN/s: Cyclophilin-like (InterPro:…	Cyclophilin-like domain | Cyclophilin-type peptidyl-prolyl cis-trans isomerase domain
7.17001	9.36673	AT3G15920	4	130	GTAG	GTAG	Phox (PX) domain-containing protein	Phox (PX) domain-containing protein; CONTAINS InterPro DOMAIN/s: Phox-like (InterPro:IPR001683); BEST Arabidopsis thaliana protein match is: Phox (PX) domain-containing protein (TAIR:AT4G32160.1)	Phox homologous domain
10.12	8.76883	AT3G16100	6	117	GTAG	GTAG	RAB GTPase homolog G3C	RAB GTPase homolog G3C (RABG3c); FUNCTIONS IN: GTP binding; INVOLVED IN: protein transport, small GTPase mediated signal transduction; LOCATED IN: plasma membrane, nucleus; EXPRESSED IN: 24 plant structures; EXPRESSED DURING: 15 growth stages; CONTAINS InterPro DOMAIN/s: Ras GTPase (InterPro:IPR001806), Small GTP-binding protein (InterPro:IPR005225), Small GTPase (InterPro:IPR020851), Ras (InterP…	P-loop containing nucleoside triphosphate hydrolase | Small GTP-binding protein domain | Small GTPase superfamily | Small GTPase superfamily, Rab type
4.33117	4.00896	AT3G16240	1	103	GTAG	GTAG	delta tonoplast integral protein	delta tonoplast integral protein (DELTA-TIP); FUNCTIONS IN: water channel activity, ammonia transmembrane transporter activity, urea transmembrane transporter activity, methylammonium transmembrane transporter activity; INVOLVED IN: transport, urea transport, water transport; LOCATED IN: in 10 components; EXPRESSED IN: 27 plant structures; EXPRESSED DURING: 14 growth stages; CONTAINS InterPro DOM…	Aquaporin-like | Major intrinsic protein | Major intrinsic protein, conserved site
7.72229	9.81978	AT3G16320	7	225	GTAG	GTAG	Tetratricopeptide repeat (TPR)-like superfamily protein	CDC27a; FUNCTIONS IN: binding; INVOLVED IN: regulation of cell division, cell cycle, gamete generation, regulation of unidimensional cell growth; LOCATED IN: anaphase-promoting complex; EXPRESSED IN: 9 plant structures; EXPRESSED DURING: 8 growth stages; CONTAINS InterPro DOMAIN/s: Tetratricopeptide TPR-1 (InterPro:IPR001440), Tetratricopeptide-like helical (InterPro:IPR011990), Tetratricopeptide…	Tetratricopeptide TPR1 | Tetratricopeptide repeat | Tetratricopeptide repeat-containing domain | Tetratricopeptide-like helical domain
2.05991	2.13271	AT3G16460	4	82	GTAG	GTAG	Mannose-binding lectin superfamily protein	Mannose-binding lectin superfamily protein; FUNCTIONS IN: copper ion binding; INVOLVED IN: response to cold; LOCATED IN: cytosol, nucleus, membrane; EXPRESSED IN: 23 plant structures; EXPRESSED DURING: 13 growth stages; CONTAINS InterPro DOMAIN/s: Mannose-binding lectin (InterPro:IPR001229); BEST Arabidopsis thaliana protein match is: myrosinase-binding protein 1 (TAIR:AT1G52040.1)	Mannose-binding lectin
9.88005	14.7088	AT3G16500	4	211	GTAG	GTAG	phytochrome-associated protein 1	phytochrome-associated protein 1 (PAP1); FUNCTIONS IN: sequence-specific DNA binding transcription factor activity; INVOLVED IN: response to auxin stimulus; LOCATED IN: nucleus; EXPRESSED IN: 22 plant structures; EXPRESSED DURING: 13 growth stages; CONTAINS InterPro DOMAIN/s: Aux/IAA-ARF-dimerisation (InterPro:IPR011525), AUX/IAA protein (InterPro:IPR003311); BEST Arabidopsis thaliana protein mat…	AUX/IAA protein | Aux/IAA-ARF-dimerisation
29.7958	114.713	AT3G16830	8	82	GTAG	GTAG	TOPLESS-related 2	TOPLESS-related 2 (TPR2); FUNCTIONS IN: protein binding; INVOLVED IN: primary shoot apical meristem specification; LOCATED IN: endomembrane system; EXPRESSED IN: 24 plant structures; EXPRESSED DURING: 13 growth stages; CONTAINS InterPro DOMAIN/s: WD40 repeat 2 (InterPro:IPR019782), WD40 repeat, conserved site (InterPro:IPR019775), WD40 repeat (InterPro:IPR001680), CTLH, C-terminal LisH motif (Int…	CTLH, C-terminal LisH motif | LisH dimerisation motif | Quinonprotein alcohol dehydrogenase-like superfamily | Topless family | WD40 repeat | WD40 repeat, conserved site | WD40-repeat-containing domain | WD40/YVTN repeat-like-containing domain
4.68931	2.25935	AT3G17000	4	517	GTAG	GTAG	ubiquitin-conjugating enzyme 32	ubiquitin-conjugating enzyme 32 (UBC32); CONTAINS InterPro DOMAIN/s: Ubiquitin-conjugating enzyme/RWD-like (InterPro:IPR016135), Ubiquitin-conjugating enzyme, E2 (InterPro:IPR000608); BEST Arabidopsis thaliana protein match is: ubiquitin-conjugating enzyme 34 (TAIR:AT1G17280.2)	Ubiquitin-conjugating enzyme, E2 | Ubiquitin-conjugating enzyme/RWD-like
55.1832	16.6933	AT3G17040	7	241	GTAG	GTAG	high chlorophyll fluorescent 107	high chlorophyll fluorescent 107 (HCF107); FUNCTIONS IN: binding; INVOLVED IN: plastid organization, RNA processing, regulation of translation; LOCATED IN: chloroplast envelope; LOCATED IN: chloroplast, plasma membrane, chloroplast envelope; EXPRESSED IN: 21 plant structures; EXPRESSED IN: 22 plant structures; EXPRESSED DURING: 13 growth stages; CONTAINS InterPro DOMAIN/s: RNA-processing protein,…	HAT (Half-A-TPR) repeat | Tetratricopeptide TPR2 | Tetratricopeptide repeat | Tetratricopeptide repeat-containing domain | Tetratricopeptide-like helical domain
2.86963	2.48325	AT3G17660	4	88	GTAG	GTAG	ARF-GAP domain 15	ARF-GAP domain 15 (AGD15); FUNCTIONS IN: ARF GTPase activator activity, DNA binding, zinc ion binding; INVOLVED IN: regulation of ARF GTPase activity; LOCATED IN: nucleus; CONTAINS InterPro DOMAIN/s: Arf GTPase activating protein (InterPro:IPR001164); BEST Arabidopsis thaliana protein match is: ARF-GAP domain 5 (TAIR:AT5G54310.1)	Arf GTPase activating protein
32.6754	42.8889	AT3G17810	5	86	GTAG	GTAG	pyrimidine 1	pyrimidine 1 (PYD1); FUNCTIONS IN: oxidoreductase activity, acting on the CH-CH group of donors, dihydropyrimidine dehydrogenase (NADP+) activity; INVOLVED IN: 'de novo' pyrimidine base biosynthetic process, uracil catabolic process, cellular response to nitrogen levels; LOCATED IN: chloroplast, plastid; EXPRESSED IN: 23 plant structures; EXPRESSED DURING: 13 growth stages; CONTAINS InterPro DOMA…	Aldolase-type TIM barrel | Dihydroorotate dehydrogenase domain | Dihydroorotate dehydrogenase, class 1/ 2
3.02725	4.21028	AT3G17910	3	483	GTAG	GTAG	Surfeit locus 1 cytochrome c oxidase biogenesis protein	SURFEIT 1 (SURF1); CONTAINS InterPro DOMAIN/s: Surfeit locus 1 (InterPro:IPR002994); BEST Arabidopsis thaliana protein match is: Surfeit locus 1 cytochrome c oxidase biogenesis protein (TAIR:AT1G48510.1)	Surfeit locus 1/Shy1
6.7505	5.03619	AT3G17930	3	89	GTAG	GTAG		unknown protein; FUNCTIONS IN: molecular_function unknown; INVOLVED IN: biological_process unknown; LOCATED IN: chloroplast thylakoid membrane; EXPRESSED IN: 22 plant structures; EXPRESSED DURING: 13 growth stages; CONTAINS InterPro DOMAIN/s: Protein of unknown function DUF3007 (InterPro:IPR021562)	Protein of unknown function DUF3007
10.187	9.85621	AT3G17940	4	93	GTAG	GTAG	Galactose mutarotase-like superfamily protein	Galactose mutarotase-like superfamily protein; FUNCTIONS IN: isomerase activity, carbohydrate binding, aldose 1-epimerase activity, catalytic activity; INVOLVED IN: galactose metabolic process, hexose metabolic process, carbohydrate metabolic process; LOCATED IN: cellular_component unknown; EXPRESSED IN: 25 plant structures; EXPRESSED DURING: 16 growth stages; CONTAINS InterPro DOMAIN/s: Glycosid…	Aldose 1-/Glucose-6-phosphate 1-epimerase | Aldose 1-epimerase | Galactose mutarotase-like domain | Glycoside hydrolase-type carbohydrate-binding, subgroup
3.93177	3.79542	AT3G17970	1	550	GTAG	GTAG	translocon at the outer membrane of chloroplasts 64-III	translocon at the outer membrane of chloroplasts 64-III (TOC64-III); FUNCTIONS IN: binding, carbon-nitrogen ligase activity, with glutamine as amido-N-donor; LOCATED IN: integral to chloroplast outer membrane, chloroplast; EXPRESSED IN: 25 plant structures; EXPRESSED DURING: 13 growth stages; CONTAINS InterPro DOMAIN/s: Tetratricopeptide TPR-1 (InterPro:IPR001440), Tetratricopeptide-like helical …	Amidase | Amidase signature domain | Tetratricopeptide TPR1 | Tetratricopeptide repeat | Tetratricopeptide repeat-containing domain | Tetratricopeptide-like helical domain
5.50696	4.72337	AT3G18380	5	165	GTAG	GTAG	sequence-specific DNA binding transcription factors;sequence-specific DNA binding	sequence-specific DNA binding transcription factors;sequence-specific DNA binding; FUNCTIONS IN: sequence-specific DNA binding, sequence-specific DNA binding transcription factor activity; INVOLVED IN: regulation of transcription, DNA-dependent; EXPRESSED IN: 22 plant structures; EXPRESSED DURING: 13 growth stages; CONTAINS InterPro DOMAIN/s: Homeobox (InterPro:IPR001356); BEST Arabidopsis thalia…	Homeobox domain | Homeodomain-like
4.43836	4.19194	AT3G18520	7	102	GTAG	GTAG	histone deacetylase 15	histone deacetylase 15 (HDA15); FUNCTIONS IN: histone deacetylase activity; INVOLVED IN: DNA mediated transformation, histone deacetylation; LOCATED IN: intracellular; EXPRESSED IN: 25 plant structures; EXPRESSED DURING: 15 growth stages; CONTAINS InterPro DOMAIN/s: Zinc finger, RanBP2-type (InterPro:IPR001876), Histone deacetylase superfamily (InterPro:IPR000286); BEST Arabidopsis thaliana prote…	Histone deacetylase domain | Histone deacetylase superfamily | Zinc finger, RanBP2-type
33.0438	12.4076	AT3G19080	3	220	GTAG	GTAG	SWIB complex BAF60b domain-containing protein	SWIB complex BAF60b domain-containing protein; CONTAINS InterPro DOMAIN/s: SWIB/MDM2 domain (InterPro:IPR003121), SWIB domain (InterPro:IPR019835), DEK, C-terminal (InterPro:IPR014876); BEST Arabidopsis thaliana protein match is: SWIB complex BAF60b domain-containing protein (TAIR:AT1G49520.1)	DEK, C-terminal | Homeodomain-like | SWIB domain | SWIB/MDM2 domain
4.07722	3.03331	AT3G19220	1	526	GTAG	GTAG	protein disulfide isomerases	SNOWY COTYLEDON 2 (SCO2)
3.65248	3.81985	AT3G19490	3	113	GTAG	GTAG	sodium:hydrogen antiporter 1	sodium:hydrogen antiporter 1 (NHD1); FUNCTIONS IN: potassium:hydrogen antiporter activity, sodium:hydrogen antiporter activity; INVOLVED IN: sodium ion transport; LOCATED IN: integral to membrane, chloroplast; EXPRESSED IN: 23 plant structures; EXPRESSED DURING: 13 growth stages; CONTAINS InterPro DOMAIN/s: Na+/H+ antiporter NhaD-like (InterPro:IPR018390), Divalent ion symporter (InterPro:IPR0046…	Citrate transporter-like domain
27.6118	-1	AT3G19590	1	104	GTAG	GTAG	Transducin/WD40 repeat-like superfamily protein	BUB (BUDDING UNINHIBITED BY BENZYMIDAZOL) 3.1 (BUB3.1); CONTAINS InterPro DOMAIN/s: WD40 repeat 2 (InterPro:IPR019782), WD40 repeat-like-containing domain (InterPro:IPR011046), WD40-repeat-containing domain (InterPro:IPR017986), WD40/YVTN repeat-like-containing domain (InterPro:IPR015943), WD40 repeat (InterPro:IPR001680), WD40 repeat, subgroup (InterPro:IPR019781), G-protein beta WD-40 repeat, r…	G-protein beta WD-40 repeat | WD40 repeat | WD40-repeat-containing domain | WD40/YVTN repeat-like-containing domain
2.25994	2.36359	AT3G19650	1	314	GTAG	GTAG	cyclin-related	cyclin-related; FUNCTIONS IN: molecular_function unknown; INVOLVED IN: biological_process unknown; LOCATED IN: cellular_component unknown; EXPRESSED IN: 23 plant structures; EXPRESSED DURING: 13 growth stages
2.05063	2.09952	AT3G19670	5	195	GTAG	GTAG	pre-mRNA-processing protein 40B	pre-mRNA-processing protein 40B (PRP40B); FUNCTIONS IN: RNA polymerase binding; INVOLVED IN: RNA splicing; LOCATED IN: nucleus; EXPRESSED IN: 21 plant structures; EXPRESSED DURING: 6 growth stages; CONTAINS InterPro DOMAIN/s: FF domain (InterPro:IPR002713), WW/Rsp5/WWP (InterPro:IPR001202); BEST Arabidopsis thaliana protein match is: pre-mRNA-processing protein 40A (TAIR:AT1G44910.1)	FF domain | Pre-mRNA-processing protein PRP40 | WW domain
4.16629	9.27491	AT3G19670	15	186	GTAG	GTAG	pre-mRNA-processing protein 40B	pre-mRNA-processing protein 40B (PRP40B); FUNCTIONS IN: RNA polymerase binding; INVOLVED IN: RNA splicing; LOCATED IN: nucleus; EXPRESSED IN: 21 plant structures; EXPRESSED DURING: 6 growth stages; CONTAINS InterPro DOMAIN/s: FF domain (InterPro:IPR002713), WW/Rsp5/WWP (InterPro:IPR001202); BEST Arabidopsis thaliana protein match is: pre-mRNA-processing protein 40A (TAIR:AT1G44910.1)	FF domain | Pre-mRNA-processing protein PRP40 | WW domain
26.5662	28.0167	AT3G19720	16	161	GTAG	GTAG	P-loop containing nucleoside triphosphate hydrolases superfamily protein	ACCUMULATION AND REPLICATION OF CHLOROPLAST 5 (ARC5); FUNCTIONS IN: GTP binding, GTPase activity; INVOLVED IN: chloroplast fission, peroxisome fission; LOCATED IN: chloroplast outer membrane, peroxisome, chloroplast; EXPRESSED IN: 23 plant structures; EXPRESSED DURING: 13 growth stages; CONTAINS InterPro DOMAIN/s: Dynamin, GTPase domain (InterPro:IPR001401); BEST Arabidopsis thaliana protein matc…	Dynamin superfamily | Dynamin, GTPase domain | P-loop containing nucleoside triphosphate hydrolase
29.1004	9.54254	AT3G19740	9	87	GTAG	GTAG	P-loop containing nucleoside triphosphate hydrolases superfamily protein	P-loop containing nucleoside triphosphate hydrolases superfamily protein; FUNCTIONS IN: nucleoside-triphosphatase activity, ATPase activity, nucleotide binding, ATP binding; INVOLVED IN: biological_process unknown; LOCATED IN: mitochondrion; EXPRESSED IN: 23 plant structures; EXPRESSED DURING: 15 growth stages; CONTAINS InterPro DOMAIN/s: ATPase, AAA-type, core (InterPro:IPR003959), ATPase, AAA+ …	AAA+ ATPase domain | ATPase, AAA-type, conserved site | ATPase, AAA-type, core | P-loop containing nucleoside triphosphate hydrolase
5.13597	4.83796	AT3G19770	1	341	GTAG	GTAG	Vacuolar sorting protein 9 (VPS9) domain	VPS9A; FUNCTIONS IN: Rho guanyl-nucleotide exchange factor activity; INVOLVED IN: cell plate assembly, transport, cell wall biogenesis, post-embryonic root development, embryo development; LOCATED IN: cytosol, nucleus, membrane; EXPRESSED IN: 23 plant structures; EXPRESSED DURING: 13 growth stages; CONTAINS InterPro DOMAIN/s: Vacuolar sorting protein 9, subgroup (InterPro:IPR013995), Vacuolar sor…	Vacuolar sorting protein 9 | Vacuolar sorting protein 9, subgroup
24.3354	13.3847	AT3G19860	3	260	GTAG	GTAG	basic helix-loop-helix (bHLH) DNA-binding superfamily protein	basic Helix-Loop-Helix 121 (bHLH121); FUNCTIONS IN: DNA binding, sequence-specific DNA binding transcription factor activity; INVOLVED IN: regulation of transcription; LOCATED IN: nucleus; EXPRESSED IN: 22 plant structures; EXPRESSED DURING: 15 growth stages; CONTAINS InterPro DOMAIN/s: Helix-loop-helix DNA-binding domain (InterPro:IPR001092), Helix-loop-helix DNA-binding (InterPro:IPR011598); BE…	Myc-type, basic helix-loop-helix (bHLH) domain
3.3059	3.44609	AT3G19900	2	259	GTAG	GTAG		unknown protein; FUNCTIONS IN: molecular_function unknown; INVOLVED IN: biological_process unknown; LOCATED IN: chloroplast; EXPRESSED IN: 23 plant structures; EXPRESSED DURING: 13 growth stages; CONTAINS InterPro DOMAIN/s: Protein of unknown function DUF3067 (InterPro:IPR021420)	Protein of unknown function DUF3067
5.91816	5.07506	AT3G20000	8	98	GTAG	GTAG	translocase of the outer mitochondrial membrane 40	translocase of the outer mitochondrial membrane 40 (TOM40); FUNCTIONS IN: voltage-gated anion channel activity, P-P-bond-hydrolysis-driven protein transmembrane transporter activity; INVOLVED IN: protein targeting to mitochondrion, anion transport; LOCATED IN: mitochondrial outer membrane, mitochondrion, mitochondrial inner membrane, plasma membrane, mitochondrial outer membrane translocase compl…	Eukaryotic porin/Tom40 | Porin domain
7.0804	4.8066	AT3G20020	1	76	GTAG	GTAG	protein arginine methyltransferase 6	protein arginine methyltransferase 6 (PRMT6); FUNCTIONS IN: protein methyltransferase activity, methyltransferase activity; INVOLVED IN: protein amino acid methylation; LOCATED IN: cytoplasm; EXPRESSED IN: 19 plant structures; EXPRESSED DURING: 7 growth stages; CONTAINS InterPro DOMAIN/s: Ribosomal L11 methyltransferase, PrmA (InterPro:IPR010456); BEST Arabidopsis thaliana protein match is: prote…	Protein arginine N-methyltransferase | Ribosomal L11 methyltransferase, PrmA | S-adenosyl-L-methionine-dependent methyltransferase-like
2.66556	2.79663	AT3G20050	2	94	GTAG	GTAG	T-complex protein 1 alpha subunit	T-complex protein 1 alpha subunit (TCP-1); FUNCTIONS IN: unfolded protein binding, ATP binding; INVOLVED IN: protein folding, cellular protein metabolic process; LOCATED IN: cellular_component unknown; EXPRESSED IN: 24 plant structures; EXPRESSED DURING: 13 growth stages; CONTAINS InterPro DOMAIN/s: Chaperonin Cpn60/TCP-1 (InterPro:IPR002423), Chaperone, tailless complex polypeptide 1 (InterPro:I…	Chaperone tailless complex polypeptide 1 (TCP-1) | Chaperonin Cpn60/TCP-1 | Chaperonin TCP-1, conserved site | GroEL-like apical domain | GroEL-like equatorial domain | TCP-1-like chaperonin intermediate domain
7.53804	13.786	AT3G20070	2	119	GTAG	GTAG	titan9	TITAN9 (TTN9); FUNCTIONS IN: molecular_function unknown; INVOLVED IN: embryo development ending in seed dormancy, endosperm development; LOCATED IN: cellular_component unknown; EXPRESSED IN: 20 plant structures; EXPRESSED DURING: 10 growth stages
2.48298	2.98136	AT3G20250	7	117	GCAG	GCAG	pumilio 5	pumilio 5 (PUM5); FUNCTIONS IN: RNA binding, binding; LOCATED IN: vacuole; EXPRESSED IN: 22 plant structures; EXPRESSED DURING: 13 growth stages; CONTAINS InterPro DOMAIN/s: Pumilio RNA-binding repeat (InterPro:IPR001313), Armadillo-like helical (InterPro:IPR011989), Armadillo-type fold (InterPro:IPR016024); BEST Arabidopsis thaliana protein match is: pumilio 6 (TAIR:AT4G25880.1)	Armadillo-like helical | Armadillo-type fold | Pumilio RNA-binding repeat
99.298	241.832	AT3G20290	7	135	GCAG	GCAG	EPS15 homology domain 1	EPS15 homology domain 1 (EHD1); FUNCTIONS IN: GTP binding, GTPase activity, calcium ion binding; INVOLVED IN: endocytosis; LOCATED IN: endosome, microsome, membrane, cytoplasm; EXPRESSED IN: 24 plant structures; EXPRESSED DURING: 15 growth stages; CONTAINS InterPro DOMAIN/s: EF-HAND 2 (InterPro:IPR018249), EPS15 homology (EH) (InterPro:IPR000261), Dynamin, GTPase domain (InterPro:IPR001401), EF-h…	Dynamin, GTPase domain | EF-hand domain | EF-hand domain pair | EPS15 homology (EH) | P-loop containing nucleoside triphosphate hydrolase
11.5021	15.1204	AT3G20790	9	86	GCAG	GCAG	NAD(P)-binding Rossmann-fold superfamily protein	NAD(P)-binding Rossmann-fold superfamily protein; FUNCTIONS IN: oxidoreductase activity, binding, catalytic activity; INVOLVED IN: oxidation reduction, metabolic process; EXPRESSED IN: 23 plant structures; EXPRESSED DURING: 15 growth stages; CONTAINS InterPro DOMAIN/s: Oxidoreductase, N-terminal (InterPro:IPR000683), Oxidoreductase, C-terminal (InterPro:IPR004104), NAD(P)-binding domain (InterPro…	NAD(P)-binding domain | Oxidoreductase, C-terminal | Oxidoreductase, N-terminal
5.9801	8.43002	AT3G21510	5	225	GTAG	GTAG	histidine-containing phosphotransmitter 1	histidine-containing phosphotransmitter 1 (AHP1); CONTAINS InterPro DOMAIN/s: Signal transduction histidine kinase, phosphotransfer (Hpt) domain (InterPro:IPR008207); BEST Arabidopsis thaliana protein match is: histidine-containing phosphotransfer factor 5 (TAIR:AT1G03430.1)	Signal transduction histidine kinase, phosphotransfer (Hpt) domain
16.3216	24.3874	AT3G22190	5	97	GTAG	GTAG	IQ-domain 5	IQ-domain 5 (IQD5); FUNCTIONS IN: calmodulin binding; INVOLVED IN: biological_process unknown; EXPRESSED IN: 23 plant structures; LOCATED IN: plasma membrane; EXPRESSED DURING: 13 growth stages; EXPRESSED IN: 24 plant structures; CONTAINS InterPro DOMAIN/s: IQ calmodulin-binding region (InterPro:IPR000048); BEST Arabidopsis thaliana protein match is: IQ-domain 6 (TAIR:AT2G26180.1)	IQ motif, EF-hand binding site
5.6665	4.57964	AT3G22200	12	117	GTAG	GTAG	Pyridoxal phosphate (PLP)-dependent transferases superfamily protein	POLLEN-PISTIL INCOMPATIBILITY 2 (POP2); CONTAINS InterPro DOMAIN/s: Pyridoxal phosphate-dependent transferase, major domain (InterPro:IPR015424), Aminotransferase class-III (InterPro:IPR005814), Pyridoxal phosphate-dependent transferase, major region, subdomain 1 (InterPro:IPR015421); FUNCTIONS IN: 4-aminobutyrate:pyruvate transaminase activity, cobalt ion binding, 4-aminobutyrate transaminase ac…	Aminotransferase class-III | Pyridoxal phosphate-dependent transferase | Pyridoxal phosphate-dependent transferase, major region, subdomain 1 | Pyridoxal phosphate-dependent transferase, major region, subdomain 2
10.5263	28.7305	AT3G22270	4	363	GTAG	GTAG	Topoisomerase II-associated protein PAT1	Topoisomerase II-associated protein PAT1; BEST Arabidopsis thaliana protein match is: Topoisomerase II-associated protein PAT1 (TAIR:AT4G14990.1)
3.36271	4.68173	AT3G22330	2	94	GTAG	GTAG	putative mitochondrial RNA helicase 2	putative mitochondrial RNA helicase 2 (PMH2); FUNCTIONS IN: helicase activity, ATP-dependent helicase activity, ATP binding, nucleic acid binding; INVOLVED IN: response to cold, Group II intron splicing; LOCATED IN: mitochondrion, nucleolus, cell wall, protein complex; EXPRESSED IN: guard cell; CONTAINS InterPro DOMAIN/s: RNA helicase, DEAD-box type, Q motif (InterPro:IPR014014), DNA/RNA helicase…	DEAD/DEAH box helicase domain | Helicase, C-terminal | Helicase, superfamily 1/2, ATP-binding domain | P-loop containing nucleoside triphosphate hydrolase | RNA helicase, DEAD-box type, Q motif
28.9352	35.4489	AT3G22440	2	100	GTAG	GTAG	FRIGIDA-like protein	FRIGIDA-like protein; CONTAINS InterPro DOMAIN/s: Frigida-like (InterPro:IPR012474); BEST Arabidopsis thaliana protein match is: FRIGIDA-like protein (TAIR:AT4G14900.1)	Frigida-like
3.60492	5.25368	AT3G22845	1	255	GTAG	GTAG	emp24/gp25L/p24 family/GOLD family protein	emp24/gp25L/p24 family/GOLD family protein; INVOLVED IN: transport; LOCATED IN: vacuole; EXPRESSED IN: 24 plant structures; EXPRESSED DURING: 15 growth stages; CONTAINS InterPro DOMAIN/s: GOLD (InterPro:IPR009038), emp24/gp25L/p24 (InterPro:IPR000348); BEST Arabidopsis thaliana protein match is: emp24/gp25L/p24 family/GOLD family protein (TAIR:AT3G07680.1)	GOLD | TMP21-related
3.08091	4.03817	AT3G23050	2	257	GTAG	GTAG	indole-3-acetic acid 7	indole-3-acetic acid 7 (IAA7); CONTAINS InterPro DOMAIN/s: Aux/IAA-ARF-dimerisation (InterPro:IPR011525), AUX/IAA protein (InterPro:IPR003311); BEST Arabidopsis thaliana protein match is: indole-3-acetic acid inducible 14 (TAIR:AT4G14550.1)	AUX/IAA protein | Aux/IAA-ARF-dimerisation
4.33817	4.72765	AT3G23100	3	168	GTAG	GTAG	homolog of human DNA ligase iv-binding protein XRCC4	homolog of human DNA ligase iv-binding protein XRCC4 (XRCC4); FUNCTIONS IN: protein C-terminus binding; INVOLVED IN: double-strand break repair, DNA recombination, metabolic process; INVOLVED IN: double-strand break repair, metabolic process, DNA recombination; LOCATED IN: nucleus; EXPRESSED IN: 15 plant structures; EXPRESSED DURING: 6 growth stages; CONTAINS InterPro DOMAIN/s: Carbamoyl phosphat…	Carbamoyl-phosphate synthetase large subunit-like, ATP-binding domain | DNA double-strand break repair and VJ recombination XRCC4, N-terminal | DNA repair protein XRCC4 | DNA repair protein XRCC4, C-terminal
5.05458	4.70775	AT3G23570	5	175	GTAG	GTAG	alpha/beta-Hydrolases superfamily protein	alpha/beta-Hydrolases superfamily protein; FUNCTIONS IN: hydrolase activity; INVOLVED IN: response to salt stress; LOCATED IN: cellular_component unknown; EXPRESSED IN: 21 plant structures; EXPRESSED DURING: 12 growth stages; CONTAINS InterPro DOMAIN/s: Dienelactone hydrolase (InterPro:IPR002925); BEST Arabidopsis thaliana protein match is: alpha/beta-Hydrolases superfamily protein (TAIR:AT3G2360…	Alpha/Beta hydrolase fold | Dienelactone hydrolase
8.09221	12.2976	AT3G23790	8	144	GTAG	GTAG	AMP-dependent synthetase and ligase family protein	acyl activating enzyme 16 (AAE16); FUNCTIONS IN: catalytic activity; INVOLVED IN: metabolic process; LOCATED IN: chloroplast envelope; EXPRESSED IN: 21 plant structures; EXPRESSED DURING: 9 growth stages; CONTAINS InterPro DOMAIN/s: AMP-binding (InterPro:IPR020459), AMP-binding, conserved site (InterPro:IPR020845), AMP-dependent synthetase/ligase (InterPro:IPR000873); BEST Arabidopsis thaliana pr…	AMP-binding | AMP-binding, conserved site | AMP-dependent synthetase/ligase
17.3962	11.5384	AT3G24140	4	136	GTAG	GTAG	basic helix-loop-helix (bHLH) DNA-binding superfamily protein	FAMA (FMA); CONTAINS InterPro DOMAIN/s: Helix-loop-helix DNA-binding domain (InterPro:IPR001092), Helix-loop-helix DNA-binding (InterPro:IPR011598); BEST Arabidopsis thaliana protein match is: basic helix-loop-helix (bHLH) DNA-binding superfamily protein (TAIR:AT1G72210.1)	Myc-type, basic helix-loop-helix (bHLH) domain
6.00301	13.0962	AT3G24460	8	87	GTAG	GTAG	Serinc-domain containing serine and sphingolipid biosynthesis protein	Serinc-domain containing serine and sphingolipid biosynthesis protein; LOCATED IN: membrane; EXPRESSED IN: 10 plant structures; EXPRESSED DURING: LP.06 six leaves visible, LP.04 four leaves visible, 4 anthesis, petal differentiation and expansion stage; CONTAINS InterPro DOMAIN/s: TMS membrane protein/tumour differentially expressed protein (InterPro:IPR005016); BEST Arabidopsis thaliana protein …	Serine incorporator/TMS membrane protein
6.21354	3.50776	AT3G25070	2	78	GTAG	GTAG	RPM1 interacting protein 4	RPM1 interacting protein 4 (RIN4); FUNCTIONS IN: protein binding; INVOLVED IN: in 6 processes; LOCATED IN: plasma membrane, membrane; EXPRESSED IN: 22 plant structures; EXPRESSED DURING: 13 growth stages; CONTAINS InterPro DOMAIN/s: RPM1-interacting protein 4, defence response (InterPro:IPR008700); BEST Arabidopsis thaliana protein match is: defense protein-related (TAIR:AT5G48657.2)	Pathogenic type III effector avirulence factor Avr cleavage site
23.3978	17.7905	AT3G25150	1	84	GCAG	GCAG	Nuclear transport factor 2 (NTF2) family protein with RNA binding (RRM-RBD-RNP motifs) domain	Nuclear transport factor 2 (NTF2) family protein with RNA binding (RRM-RBD-RNP motifs) domain; FUNCTIONS IN: RNA binding, nucleotide binding, nucleic acid binding; INVOLVED IN: transport, nucleocytoplasmic transport; LOCATED IN: intracellular; EXPRESSED IN: 23 plant structures; EXPRESSED DURING: 13 growth stages; CONTAINS InterPro DOMAIN/s: Nuclear transport factor 2 (InterPro:IPR002075), Nuclear…	Nuclear transport factor 2 | Nuclear transport factor 2, eukaryote | Nucleotide-binding, alpha-beta plait | RNA recognition motif domain
3.72426	2.79115	AT3G25840	15	160	GTAG	GTAG	Protein kinase superfamily protein	Protein kinase superfamily protein; FUNCTIONS IN: protein serine/threonine kinase activity, protein kinase activity, ATP binding; INVOLVED IN: protein amino acid phosphorylation; LOCATED IN: nucleus; EXPRESSED IN: 25 plant structures; EXPRESSED DURING: 15 growth stages; CONTAINS InterPro DOMAIN/s: Protein kinase, catalytic domain (InterPro:IPR000719), Serine/threonine-protein kinase domain (Inter…	Protein kinase domain | Protein kinase-like domain | Serine/threonine-protein kinase, active site | Serine/threonine/dual specificity protein kinase, catalytic domain
2.30541	2.98181	AT3G25940	3	213	GTAG	GTAG	TFIIB zinc-binding protein	TFIIB zinc-binding protein; FUNCTIONS IN: transcription regulator activity, DNA binding, sequence-specific DNA binding transcription factor activity, zinc ion binding, nucleic acid binding; INVOLVED IN: RNA elongation, regulation of transcription, DNA-dependent, regulation of transcription; LOCATED IN: nucleus; EXPRESSED IN: 21 plant structures; EXPRESSED DURING: 13 growth stages; CONTAINS InterP…	DNA-directed RNA polymerase, subunit C11/M/9 | Zinc finger, TFIIS-type
4.06102	2.75057	AT3G26070	3	167	GTAG	GTAG	Plastid-lipid associated protein PAP / fibrillin family protein	Plastid-lipid associated protein PAP / fibrillin family protein; FUNCTIONS IN: structural molecule activity; INVOLVED IN: biological_process unknown; LOCATED IN: chloroplast thylakoid membrane, chloroplast, plastoglobule; CONTAINS InterPro DOMAIN/s: Plastid lipid-associated protein/fibrillin (InterPro:IPR006843); BEST Arabidopsis thaliana protein match is: plastid-lipid associated protein PAP / f…	Plastid lipid-associated protein/fibrillin conserved domain
10.2562	8.45941	AT3G26085	5	81	GTAG	GTAG	CAAX amino terminal protease family protein	CAAX amino terminal protease family protein; FUNCTIONS IN: molecular_function unknown; INVOLVED IN: proteolysis; LOCATED IN: membrane; EXPRESSED IN: 22 plant structures; EXPRESSED DURING: 13 growth stages; CONTAINS InterPro DOMAIN/s: Abortive infection protein (InterPro:IPR003675)	CAAX amino terminal protease
14.5171	27.2028	AT3G26090	9	87	GTAG	GTAG	G-protein coupled receptors;GTPase activators	REGULATOR OF G-PROTEIN SIGNALING 1 (RGS1); FUNCTIONS IN: G-protein coupled receptor activity, GTPase activator activity; INVOLVED IN: in 6 processes; LOCATED IN: nucleus, plasma membrane; EXPRESSED IN: 23 plant structures; EXPRESSED DURING: 13 growth stages; CONTAINS InterPro DOMAIN/s: Regulator of G protein signalling superfamily (InterPro:IPR016137), Regulator of G protein signalling (InterPro:…	Regulator of G protein signalling domain | Regulator of G protein signalling superfamily
4.655	4.3695	AT3G26440	10	82	GTAG	GTAG	Protein of unknown function (DUF707)	Protein of unknown function (DUF707); FUNCTIONS IN: molecular_function unknown; INVOLVED IN: biological_process unknown; LOCATED IN: cellular_component unknown; EXPRESSED IN: 14 plant structures; EXPRESSED DURING: 7 growth stages; CONTAINS InterPro DOMAIN/s: Protein of unknown function DUF707 (InterPro:IPR007877); BEST Arabidopsis thaliana protein match is: Protein of unknown function (DUF707) (T…	Protein of unknown function DUF707
45.5224	8.66807	AT3G26612	2	87	GTAG	GTAG	other RNA
8.69088	7.19628	AT3G26710	2	72	GTAG	GTAG	cofactor assembly of complex C	cofactor assembly of complex C (CCB1); FUNCTIONS IN: molecular_function unknown; INVOLVED IN: cytochrome b6f complex assembly; LOCATED IN: chloroplast; EXPRESSED IN: 23 plant structures; EXPRESSED DURING: 13 growth stages; CONTAINS InterPro DOMAIN/s: Protein of unknown function DUF3529 (InterPro:IPR021919)	Protein of unknown function DUF3529
10.0226	6.62004	AT3G26922	1	113	GTAG	GTAG	F-box/RNI-like superfamily protein	F-box/RNI-like superfamily protein; FUNCTIONS IN: molecular_function unknown; INVOLVED IN: biological_process unknown; LOCATED IN: cellular_component unknown; CONTAINS InterPro DOMAIN/s: F-box domain, cyclin-like (InterPro:IPR001810), F-box domain, Skp2-like (InterPro:IPR022364), Leucine-rich repeat 2 (InterPro:IPR013101); BEST Arabidopsis thaliana protein match is: F-box/RNI-like/FBD-like domain…	F-box domain | Leucine-rich repeat 2
9.10654	7.17255	AT3G27110	6	102	GTAG	GTAG	Peptidase family M48 family protein	Peptidase family M48 family protein; FUNCTIONS IN: metalloendopeptidase activity; INVOLVED IN: proteolysis; LOCATED IN: chloroplast, membrane; EXPRESSED IN: 22 plant structures; EXPRESSED DURING: 13 growth stages; CONTAINS InterPro DOMAIN/s: Peptidase M48 (InterPro:IPR001915)	Peptidase M48
4.45463	2.58268	AT3G27470	10	112	GTAG	GTAG	Protein of unknown function (DUF707)	Protein of unknown function (DUF707); FUNCTIONS IN: molecular_function unknown; INVOLVED IN: biological_process unknown; LOCATED IN: endomembrane system; EXPRESSED IN: 23 plant structures; EXPRESSED DURING: 14 growth stages; CONTAINS InterPro DOMAIN/s: Protein of unknown function DUF707 (InterPro:IPR007877); BEST Arabidopsis thaliana protein match is: Protein of unknown function (DUF707) (TAIR:AT…	Protein of unknown function DUF707
3.1506	2.13197	AT3G28080	3	1244	GTAG	GTAG	nodulin MtN21 /EamA-like transporter family protein	nodulin MtN21 /EamA-like transporter family protein; FUNCTIONS IN: molecular_function unknown; INVOLVED IN: biological_process unknown; LOCATED IN: membrane; EXPRESSED IN: 21 plant structures; EXPRESSED DURING: 13 growth stages; CONTAINS InterPro DOMAIN/s: Protein of unknown function DUF6, transmembrane (InterPro:IPR000620); BEST Arabidopsis thaliana protein match is: nodulin MtN21 /EamA-like tra…	Drug/metabolite transporter
3.21776	2.02188	AT3G28130	4	76	GTAG	GTAG	nodulin MtN21 /EamA-like transporter family protein	nodulin MtN21 /EamA-like transporter family protein; INVOLVED IN: biological_process unknown; LOCATED IN: membrane; EXPRESSED IN: 22 plant structures; EXPRESSED DURING: 13 growth stages; CONTAINS InterPro DOMAIN/s: Protein of unknown function DUF6, transmembrane (InterPro:IPR000620); BEST Arabidopsis thaliana protein match is: nodulin MtN21 /EamA-like transporter family protein (TAIR:AT3G28070.1)…	Drug/metabolite transporter
3.53071	4.42434	AT3G28430	19	73	GTAG	GTAG		unknown protein; FUNCTIONS IN: molecular_function unknown; INVOLVED IN: biological_process unknown; LOCATED IN: mitochondrion; EXPRESSED IN: 17 plant structures; EXPRESSED DURING: 6 growth stages; CONTAINS InterPro DOMAIN/s: Protein of unknown function FPL (InterPro:IPR019155)	Armadillo-type fold | Uncharacterised protein family FPL
2.42949	3.46741	AT3G28700	1	64	GTAG	GTAG	Protein of unknown function (DUF185)	Protein of unknown function (DUF185); FUNCTIONS IN: zinc ion binding; INVOLVED IN: biological_process unknown; LOCATED IN: cellular_component unknown; EXPRESSED IN: 22 plant structures; EXPRESSED DURING: 13 growth stages; CONTAINS InterPro DOMAIN/s: Protein of unknown function DUF185 (InterPro:IPR003788)	Putative S-adenosyl-L-methionine-dependent methyltransferase MidA | S-adenosyl-L-methionine-dependent methyltransferase-like
8.85193	11.814	AT3G28710	5	100	GTAG	GTAG	ATPase, V0/A0 complex, subunit C/D	ATPase, V0/A0 complex, subunit C/D; FUNCTIONS IN: hydrogen ion transmembrane transporter activity, proton-transporting ATPase activity, rotational mechanism; INVOLVED IN: proton transport, ATP synthesis coupled proton transport; LOCATED IN: vacuolar membrane, plasma membrane, vacuole, plant-type vacuole; EXPRESSED IN: cultured cell, callus; CONTAINS InterPro DOMAIN/s: ATPase, V0/A0 complex, subun…	ATPase, V0 complex, c/d subunit | ATPase, V0 complex, subunit d
9.32814	9.35836	AT3G28710	2	78	GTAG	GTAG	ATPase, V0/A0 complex, subunit C/D	ATPase, V0/A0 complex, subunit C/D; FUNCTIONS IN: hydrogen ion transmembrane transporter activity, proton-transporting ATPase activity, rotational mechanism; INVOLVED IN: proton transport, ATP synthesis coupled proton transport; LOCATED IN: vacuolar membrane, plasma membrane, vacuole, plant-type vacuole; EXPRESSED IN: cultured cell, callus; CONTAINS InterPro DOMAIN/s: ATPase, V0/A0 complex, subun…	ATPase, V0 complex, c/d subunit | ATPase, V0 complex, subunit d
4.07427	6.4162	AT3G28715	5	100	GTAG	GTAG	ATPase, V0/A0 complex, subunit C/D	ATPase, V0/A0 complex, subunit C/D; FUNCTIONS IN: hydrogen ion transmembrane transporter activity, proton-transporting ATPase activity, rotational mechanism; INVOLVED IN: proton transport, ATP synthesis coupled proton transport; EXPRESSED IN: male gametophyte, pollen tube; LOCATED IN: plasma membrane, vacuole; EXPRESSED DURING: L mature pollen stage, M germinated pollen stage; EXPRESSED IN: male …	ATPase, V0 complex, c/d subunit | ATPase, V0 complex, subunit d
11.9828	8.62647	AT3G28730	12	80	GCAG	GCAG	high mobility group	high mobility group (HMG); CONTAINS InterPro DOMAIN/s: Structure-specific recognition protein (InterPro:IPR000969), High mobility group, superfamily (InterPro:IPR009071), High mobility group, HMG1/HMG2 (InterPro:IPR000910); BEST Arabidopsis thaliana protein match is: high mobility group B1 (TAIR:AT3G51880.2)	Domain of unknown function DUF1747 | High mobility group box domain | Pleckstrin homology-like domain | SSRP1 domain | Structure-specific recognition protein
11.1681	6.25591	AT3G28970	6	87	GCAG	GCAG	Domain of unknown function (DUF298)	antiauxin-resistant 3 (AAR3); CONTAINS InterPro DOMAIN/s: Defective-in-cullin neddylation protein (InterPro:IPR014764), Protein of unknown function DUF298 (InterPro:IPR005176); BEST Arabidopsis thaliana protein match is: unknown protein (TAIR:AT3G12760.1)	Defective-in-cullin neddylation protein | Potentiating neddylation domain
2.74569	2.59353	AT3G30300	3	97	GTAG	GTAG	O-fucosyltransferase family protein	O-fucosyltransferase family protein; FUNCTIONS IN: molecular_function unknown; INVOLVED IN: biological_process unknown; LOCATED IN: endomembrane system; EXPRESSED IN: 22 plant structures; EXPRESSED DURING: 13 growth stages; CONTAINS InterPro DOMAIN/s: GDP-fucose protein O-fucosyltransferase (InterPro:IPR019378); BEST Arabidopsis thaliana protein match is: O-fucosyltransferase family protein (TAIR…	GDP-fucose protein O-fucosyltransferase
6.97753	6.50779	AT3G42050	2	150	GTAG	GTAG	vacuolar ATP synthase subunit H family protein	vacuolar ATP synthase subunit H family protein; FUNCTIONS IN: binding, hydrolase activity, acting on acid anhydrides, catalyzing transmembrane movement of substances, proton-transporting ATPase activity, rotational mechanism; INVOLVED IN: ATP synthesis coupled proton transport; LOCATED IN: vacuolar membrane, chloroplast, plasma membrane, vacuole, plant-type vacuole; EXPRESSED IN: 27 plant structu…	ATPase, V1 complex, subunit H | ATPase, V1 complex, subunit H, C-terminal | Armadillo-like helical | Armadillo-type fold
7.39519	-1	AT3G43190	8	83	GTAG	GTAG	sucrose synthase 4	sucrose synthase 4 (SUS4); FUNCTIONS IN: UDP-glycosyltransferase activity, sucrose synthase activity, transferase activity, transferring glycosyl groups; INVOLVED IN: sucrose biosynthetic process, response to hypoxia; LOCATED IN: plasma membrane, vacuole, membrane; EXPRESSED IN: 15 plant structures; EXPRESSED DURING: 6 growth stages; CONTAINS InterPro DOMAIN/s: Sucrose synthase, plant/cyanobacter…	Glycosyl transferase, family 1 | Sucrose synthase | Sucrose synthase, plant/cyanobacteria
26.313	10.2577	AT3G43220	1	151	GTAG	GTAG	Phosphoinositide phosphatase family protein	Phosphoinositide phosphatase family protein; FUNCTIONS IN: phosphatidylinositol-4,5-bisphosphate 5-phosphatase activity; INVOLVED IN: biological_process unknown; LOCATED IN: cellular_component unknown; EXPRESSED IN: 23 plant structures; EXPRESSED DURING: 15 growth stages; CONTAINS InterPro DOMAIN/s: Synaptojanin, N-terminal (InterPro:IPR002013); BEST Arabidopsis thaliana protein match is: Phospho…	Synaptojanin, N-terminal
18.2837	38.456	AT3G43300	3	74	GTAG	GTAG	HOPM interactor 7	HOPM interactor 7 (ATMIN7); CONTAINS InterPro DOMAIN/s: SEC7-like (InterPro:IPR000904), Armadillo-type fold (InterPro:IPR016024), Protein of unknown function DUF1981, SEC7 associated (InterPro:IPR015403); FUNCTIONS IN: protein binding, guanyl-nucleotide exchange factor activity; BEST Arabidopsis thaliana protein match is: SEC7-like guanine nucleotide exchange family protein (TAIR:AT1G01960.1); IN…
8.35825	8.32021	AT3G43600	3	82	GCAG	GCAG	aldehyde oxidase 2	aldehyde oxidase 2 (AAO2); FUNCTIONS IN: aldehyde oxidase activity; INVOLVED IN: oxidation reduction; EXPRESSED IN: 16 plant structures; EXPRESSED DURING: 13 growth stages; CONTAINS InterPro DOMAIN/s: Aldehyde oxidase/xanthine dehydrogenase (InterPro:IPR016208), Ferredoxin (InterPro:IPR001041), Molybdopterin dehydrogenase, FAD-binding (InterPro:IPR002346), [2Fe-2S]-binding (InterPro:IPR002888), F…	2Fe-2S ferredoxin, iron-sulphur binding site | 2Fe-2S ferredoxin-type domain | Aldehyde oxidase/xanthine dehydrogenase | Aldehyde oxidase/xanthine dehydrogenase, a/b hammerhead | Aldehyde oxidase/xanthine dehydrogenase, molybdopterin binding | Beta-grasp domain | CO dehydrogenase flavoprotein, C-terminal | CO dehydrogenase flavoprotein-like, FAD-binding, subdomain 2 | FAD-binding, type 2 | FAD-bi…
4.94332	3.18555	AT3G43790	10	121	GTAG	GTAG	zinc induced facilitator-like 2	zinc induced facilitator-like 2 (ZIFL2); CONTAINS InterPro DOMAIN/s: Major facilitator superfamily (InterPro:IPR020846), Major facilitator superfamily MFS-1 (InterPro:IPR011701), Major facilitator superfamily, general substrate transporter (InterPro:IPR016196); BEST Arabidopsis thaliana protein match is: zinc induced facilitator-like 1 (TAIR:AT5G13750.1)	Major facilitator superfamily | Major facilitator superfamily domain | Major facilitator superfamily domain, general substrate transporter
8.02233	4.58861	AT3G44310	4	86	GTAG	GTAG	nitrilase 1	nitrilase 1 (NIT1); FUNCTIONS IN: indole-3-acetonitrile nitrilase activity, nitrilase activity, indole-3-acetonitrile nitrile hydratase activity; INVOLVED IN: indoleacetic acid biosynthetic process; LOCATED IN: apoplast, chloroplast, plasma membrane; EXPRESSED IN: guard cell, cultured cell, leaf; EXPRESSED IN: guard cell, leaf; EXPRESSED DURING: seedling growth; CONTAINS InterPro DOMAIN/s: Nitril…	Carbon-nitrogen hydrolase | Nitrilase/cyanide hydratase, conserved site
3.49148	2.82807	AT3G44370	6	580	GTAG	GTAG	Membrane insertion protein, OxaA/YidC with tetratricopeptide repeat domain	Membrane insertion protein, OxaA/YidC with tetratricopeptide repeat domain; FUNCTIONS IN: binding; INVOLVED IN: protein insertion into membrane; LOCATED IN: mitochondrion; EXPRESSED IN: 20 plant structures; EXPRESSED DURING: 9 growth stages; CONTAINS InterPro DOMAIN/s: Tetratricopeptide-like helical (InterPro:IPR011990), Membrane insertion protein, OxaA/YidC (InterPro:IPR001708), Tetratricopeptid…	Membrane insertase OXA1/ALB3/YidC | Tetratricopeptide TPR2 | Tetratricopeptide repeat-containing domain | Tetratricopeptide-like helical domain
2.45688	3.45664	AT3G44480	7	179	GTAG	GTAG	Disease resistance protein (TIR-NBS-LRR class) family	recognition of peronospora parasitica 1 (RPP1); CONTAINS InterPro DOMAIN/s: NB-ARC (InterPro:IPR002182), Leucine-rich repeat (InterPro:IPR001611), Disease resistance protein (InterPro:IPR000767), Toll-Interleukin receptor (InterPro:IPR000157); BEST Arabidopsis thaliana protein match is: Disease resistance protein (TIR-NBS-LRR class) family (TAIR:AT3G44630.1)	AAA+ ATPase domain | Leucine-rich repeat | Leucine-rich repeat 3 | NB-ARC | P-loop containing nucleoside triphosphate hydrolase | Toll/interleukin-1 receptor homology (TIR) domain
6.5975	4.86728	AT3G45260	3	182	GCAG	GCAG	C2H2-like zinc finger protein	C2H2-like zinc finger protein; FUNCTIONS IN: sequence-specific DNA binding transcription factor activity, zinc ion binding, nucleic acid binding; INVOLVED IN: regulation of transcription; LOCATED IN: intracellular; EXPRESSED IN: 13 plant structures; EXPRESSED DURING: 9 growth stages; CONTAINS InterPro DOMAIN/s: Zinc finger, C2H2-like (InterPro:IPR015880), Zinc finger, C2H2-type (InterPro:IPR00708…	Zinc finger C2H2-type/integrase DNA-binding domain | Zinc finger, C2H2 | Zinc finger, C2H2-like | Zinc finger, double-stranded RNA binding
20.5801	59.8044	AT3G45750	6	77	GTAG	GTAG	Nucleotidyltransferase family protein	Nucleotidyltransferase family protein; FUNCTIONS IN: molecular_function unknown; INVOLVED IN: biological_process unknown; LOCATED IN: cellular_component unknown; EXPRESSED IN: 23 plant structures; EXPRESSED DURING: 14 growth stages; BEST Arabidopsis thaliana protein match is: Nucleotidyltransferase family protein (TAIR:AT3G45760.1)
24.6522	14.8839	AT3G45780	18	87	GTAG	GTAG	phototropin 1	phototropin 1 (PHOT1); FUNCTIONS IN: protein binding, protein serine/threonine kinase activity, FMN binding, kinase activity, blue light photoreceptor activity; INVOLVED IN: in 8 processes; LOCATED IN: internal side of plasma membrane, vacuole, cytoplasm; EXPRESSED IN: 23 plant structures; EXPRESSED DURING: 13 growth stages; CONTAINS InterPro DOMAIN/s: PAC motif (InterPro:IPR001610), Protein kina…	PAC motif | PAS domain | PAS-associated, C-terminal | Protein kinase domain | Protein kinase, ATP binding site | Protein kinase-like domain | Serine/threonine-protein kinase, active site | Serine/threonine/dual specificity protein kinase, catalytic domain
4.64307	5.59001	AT3G45850	15	68	GTAG	GTAG	P-loop containing nucleoside triphosphate hydrolases superfamily protein	P-loop containing nucleoside triphosphate hydrolases superfamily protein; FUNCTIONS IN: microtubule motor activity, ATP binding; INVOLVED IN: microtubule-based movement; EXPRESSED IN: 23 plant structures; LOCATED IN: plasma membrane; EXPRESSED DURING: 13 growth stages; CONTAINS InterPro DOMAIN/s: Kinesin, motor region, conserved site (InterPro:IPR019821), Kinesin, motor domain (InterPro:IPR001752…
7.2249	5.73677	AT3G45850	5	82	GTAG	GTAG	P-loop containing nucleoside triphosphate hydrolases superfamily protein	P-loop containing nucleoside triphosphate hydrolases superfamily protein; FUNCTIONS IN: microtubule motor activity, ATP binding; INVOLVED IN: microtubule-based movement; EXPRESSED IN: 23 plant structures; LOCATED IN: plasma membrane; EXPRESSED DURING: 13 growth stages; CONTAINS InterPro DOMAIN/s: Kinesin, motor region, conserved site (InterPro:IPR019821), Kinesin, motor domain (InterPro:IPR001752…
5.71364	8.65881	AT3G45900	2	84	GTAG	GTAG	Ribonuclease P protein subunit P38-related	Ribonuclease P protein subunit P38-related; BEST Arabidopsis thaliana protein match is: Ribonuclease P protein subunit P38-related (TAIR:AT5G53020.1)
4.20228	4.85501	AT3G46100	7	144	GTAG	GTAG	Histidyl-tRNA synthetase 1	Histidyl-tRNA synthetase 1 (HRS1); FUNCTIONS IN: histidine-tRNA ligase activity; INVOLVED IN: histidyl-tRNA aminoacylation; LOCATED IN: mitochondrion, chloroplast; EXPRESSED IN: 22 plant structures; EXPRESSED DURING: 13 growth stages; CONTAINS InterPro DOMAIN/s: Histidyl-tRNA synthetase, class IIa, subgroup (InterPro:IPR015807), Aminoacyl-tRNA synthetase, class II (G/ H/ P/ S), conserved domain (…	Aminoacyl-tRNA synthetase, class II | Aminoacyl-tRNA synthetase, class II (G/ H/ P/ S), conserved domain | Anticodon-binding | Histidine-tRNA ligase | Histidine-tRNA ligase/ATP phosphoribosyltransferase regulatory subunit
5.77863	5.34801	AT3G46200	4	108	GTAG	GTAG	nudix hydrolase homolog 9	nudix hydrolase homolog 9 (NUDT9); FUNCTIONS IN: hydrolase activity; INVOLVED IN: biological_process unknown; LOCATED IN: cytosol; EXPRESSED IN: 15 plant structures; EXPRESSED DURING: 8 growth stages; CONTAINS InterPro DOMAIN/s: NUDIX hydrolase domain-like (InterPro:IPR015797), NUDIX hydrolase domain (InterPro:IPR000086)	NUDIX hydrolase domain | NUDIX hydrolase domain-like
5.68249	6.51475	AT3G46540	3	95	GTAG	GTAG	ENTH/VHS family protein	ENTH/VHS family protein; FUNCTIONS IN: binding; INVOLVED IN: biological_process unknown; LOCATED IN: cellular_component unknown; EXPRESSED IN: 22 plant structures; EXPRESSED DURING: 13 growth stages; CONTAINS InterPro DOMAIN/s: Epsin, N-terminal (InterPro:IPR001026), Epsin-like, N-terminal (InterPro:IPR013809), ENTH/VHS (InterPro:IPR008942); BEST Arabidopsis thaliana protein match is: ENTH/VHS fa…	ENTH/VHS | Epsin domain, N-terminal | Epsin-like, N-terminal
[truncated: 657 more rows]

## Sheet: GO_Share_IR_C
Term Name	GOID	Term Type	Depth	cnt(reference)	cnt(Share_IR)	fsh(Share_IR)
intracellular	GO:0005622	C	3	8832	642	4.19741e-70
[truncated: 132 more rows]

## Sheet: GO_Share_IR_F
Term Name	GOID	Term Type	Depth	cnt(reference)	cnt(Share_IR)	fsh(Share_IR)
[truncated: 278 more rows]

[truncated: 6 more sheets: GO_Share_IR_P, Share_MES, GO_Share_MES_C, GO_Share_MES_F, GO_Share_MES_P, Sheet1]
