# Supplementary material for: A Genetic Screen Identifies PRP18a, a Putative Second Step Splicing Factor Important for Alternative Splicing and a Normal Phenotype in Arabidopsis thaliana
Source: G3 (Bethesda). 2018 Feb 27;8(4):1367–77. doi: 10.1534/g3.118.200022 (PMC5873924; doi:10.1534/g3.118.200022)
Supplement: Supplementary file 7 [file 1367TableS3.xlsx]

## Sheet: info
	# of introns	# of genes
Total: p<0.01 AND (FC>=2 OR FC<=0.5) AND no-mutation	3	3
FC>=2 total	3	3
FC<=0.5 total	0	0

## Sheet: Share_ES_FC>=2
M_foldChange	BC_foldChange	GeneID	exonPair	description	comp_description	IPR_domain
57.3009	57.2244	AT1G23360	2<=>4	S-adenosyl-L-methionine-dependent methyltransferases superfamily protein	MENG; CONTAINS InterPro DOMAIN/s: UbiE/COQ5 methyltransferase (InterPro:IPR004033); BEST Arabidopsis thaliana protein match is: S-adenosyl-L-methionine-dependent methyltransferases superfamily protein (TAIR:AT5G57300.3)	S-adenosyl-L-methionine-dependent methyltransferase-like | UbiE/COQ5 methyltransferase | UbiE/COQ5 methyltransferase, conserved site
2.61643	2.54906	AT1G30590	6<=>8	RNA polymerase I specific transcription initiation factor RRN3 protein	RNA polymerase I specific transcription initiation factor RRN3 protein; CONTAINS InterPro DOMAIN/s: RNA polymerase I specific transcription initiation factor RRN3 (InterPro:IPR007991); BEST Arabidopsis thaliana protein match is: RNA polymerase I specific transcription initiation factor RRN3 protein (TAIR:AT2G34750.1)	RNA polymerase I specific transcription initiation factor RRN3
5.59436	11.2499	AT2G32640	7<=>9	Lycopene beta/epsilon cyclase protein	Lycopene beta/epsilon cyclase protein; FUNCTIONS IN: oxidoreductase activity, acting on paired donors, with incorporation or reduction of molecular oxygen; INVOLVED IN: carotenoid biosynthetic process; LOCATED IN: chloroplast; EXPRESSED IN: 20 plant structures; EXPRESSED DURING: 13 growth stages; CONTAINS InterPro DOMAIN/s: Lycopene beta/epsilon cyclase (InterPro:IPR008671)	Lycopene cyclase-type, FAD-binding

## Sheet: Share_ES_FC<=0.5
None
