# Supplementary material for: A Genetic Screen Identifies PRP18a, a Putative Second Step Splicing Factor Important for Alternative Splicing and a Normal Phenotype in Arabidopsis thaliana
Source: G3 (Bethesda). 2018 Feb 27;8(4):1367–77. doi: 10.1534/g3.118.200022 (PMC5873924; doi:10.1534/g3.118.200022)
Supplement: Supplementary file 8 [file 1367TableS4.xlsx]

## Sheet: info
p<0.01 AND (FC>=2 OR FC<=0.5) AND no-mutation
	FC>=2	FC<=0.5	Total
# of introns	33	90+1	124
5'_ss	5	14	19
3'_ss	28	73	101
5'/3'_ss	0	3+1	4
#of genes	33	90+1	124
GTAG->GTAG	33	82
GTAG->non_GTAG	0	0
GTAG->GTAG	0	0
non_GTAG->non_GTAG	0	9
FC>=2 means splice variants 1 (column B) is more abundant than 2x in mutant than ST.
FC<=0.5 means splice variants 1 (column B) is less abundant than 0.5x in mutant than ST.

## Sheet: Share_FC>=2
M_foldChange	BC_foldChange	GeneID	Splice1	Donor/Acceptor Change	T	prp18a-1	description	comp_description	IPR_domain
2.24742	3.91651	AT1G08520	4(0)-5(-5)	A	GTAG	GTAG	ALBINA 1	ALBINA 1 (ALB1); FUNCTIONS IN: magnesium chelatase activity, nucleoside-triphosphatase activity, nucleotide binding, ATP binding; INVOLVED IN: chlorophyll biosynthetic process; LOCATED IN: magnesium chelatase complex, chloroplast; EXPRESSED IN: 24 plant structures; EXPRESSED DURING: 13 growth stages; CONTAINS InterPro DOMAIN/s: ATPase, AAA+ type, core (InterPro:IPR003593), Magnesium chelatase, Ch…	AAA+ ATPase domain | Magnesium chelatase, ATPase subunit D | Magnesium chelatase, ChlI subunit | P-loop containing nucleoside triphosphate hydrolase | von Willebrand factor, type A
2.04732	2.70043	AT1G10910	3(0)-4(-10)	A	GTAG	GTAG	Pentatricopeptide repeat (PPR) superfamily protein	Pentatricopeptide repeat (PPR) superfamily protein; CONTAINS InterPro DOMAIN/s: Pentatricopeptide repeat (InterPro:IPR002885); BEST Arabidopsis thaliana protein match is: plastid transcriptionally active 2 (TAIR:AT1G74850.1)	Pentatricopeptide repeat
13.0105	10.2509	AT1G59840	5(0)-6(-42)	A	GTAG	GTAG	cofactor assembly of complex C	cofactor assembly of complex C (CCB4); FUNCTIONS IN: molecular_function unknown; INVOLVED IN: cytochrome b6f complex assembly; LOCATED IN: chloroplast; EXPRESSED IN: 20 plant structures; EXPRESSED DURING: 13 growth stages; CONTAINS InterPro DOMAIN/s: Protein of unknown function DUF2930 (InterPro:IPR021325)	Protein of unknown function DUF2930
2.5612	2.90409	AT1G71696	11(0)-12(-4)	A	GTAG	GTAG	carboxypeptidase D, putative	SUPPRESSOR OF LLP1 1 (SOL1); FUNCTIONS IN: metallocarboxypeptidase activity, carboxypeptidase activity, zinc ion binding; INVOLVED IN: regulation of root meristem growth; LOCATED IN: endomembrane system; EXPRESSED IN: 14 plant structures; EXPRESSED DURING: 6 growth stages; CONTAINS InterPro DOMAIN/s: Carboxypeptidase-like, regulatory domain (InterPro:IPR008969), Peptidase M14, carboxypeptidase A …	Carboxypeptidase, regulatory domain | Carboxypeptidase-like, regulatory domain | Peptidase M14, carboxypeptidase A
2.07141	4.79896	AT1G71860	6(0)-7(-5)	A	GTAG	GTAG	protein tyrosine phosphatase 1	protein tyrosine phosphatase 1 (PTP1); FUNCTIONS IN: protein tyrosine phosphatase activity; INVOLVED IN: intracellular protein kinase cascade; LOCATED IN: nucleus, plasma membrane, cytoplasm; EXPRESSED IN: 25 plant structures; EXPRESSED DURING: 15 growth stages; CONTAINS InterPro DOMAIN/s: Protein-tyrosine phosphatase, active site (InterPro:IPR016130), Dual-specific/protein-tyrosine phosphatase, …	Protein-tyrosine phosphatase, active site | Protein-tyrosine phosphatase, receptor/non-receptor type | Protein-tyrosine phosphatase-like | Protein-tyrosine/Dual specificity phosphatase
2.1566	3.09256	AT1G72640	3(-20)-4(0)	A	GTAG	GTAG	NAD(P)-binding Rossmann-fold superfamily protein	NAD(P)-binding Rossmann-fold superfamily protein; FUNCTIONS IN: binding, catalytic activity; INVOLVED IN: metabolic process; LOCATED IN: chloroplast thylakoid membrane, chloroplast; CONTAINS InterPro DOMAIN/s: NAD(P)-binding domain (InterPro:IPR016040)	NAD(P)-binding domain
3.11418	5.69461	AT1G73180	4(0)-5(-10)	A	GTAG	GTAG	Eukaryotic translation initiation factor eIF2A family protein	Eukaryotic translation initiation factor eIF2A family protein; FUNCTIONS IN: molecular_function unknown; INVOLVED IN: biological_process unknown; LOCATED IN: plasma membrane; EXPRESSED IN: 21 plant structures; EXPRESSED DURING: 13 growth stages; CONTAINS InterPro DOMAIN/s: WD40 repeat-like-containing domain (InterPro:IPR011046), Eukaryotic translation initiation factor 2A, central region (InterPr…	Translation initiation factor 2A | Translation initiation factor, beta propellor-like domain | WD40/YVTN repeat-like-containing domain
2.26711	5.26328	AT1G79990	19(+23)-20(0)	D	GTAG	GTAG	structural molecules	structural molecules; FUNCTIONS IN: structural molecule activity; LOCATED IN: endomembrane system, COPI vesicle coat, Golgi membrane; INVOLVED IN: intracellular protein transport, vesicle-mediated transport; LOCATED IN: membrane coat, COPI vesicle coat; LOCATED IN: membrane coat, endomembrane system, COPI vesicle coat; CONTAINS InterPro DOMAIN/s: Integral membrane protein SYS1 (InterPro:IPR016973…	Coatomer beta' subunit (COPB2) | Coatomer, WD associated region | G-protein beta WD-40 repeat | Integral membrane protein SYS1 | Integral membrane protein SYS1-related | WD40 repeat | WD40-repeat-containing domain | WD40/YVTN repeat-like-containing domain
2.20513	3.57615	AT2G22990	2(+10)-3(0)	D	GTAG	GTAG	sinapoylglucose 1	sinapoylglucose 1; sinapoylglucose 1 (SNG1); CONTAINS InterPro DOMAIN/s: Peptidase S10, serine carboxypeptidase (InterPro:IPR001563); FUNCTIONS IN: sinapoylglucose-malate O-sinapoyltransferase activity, serine-type carboxypeptidase activity; BEST Arabidopsis thaliana protein match is: serine carboxypeptidase-like 9 (TAIR:AT2G23010.1); INVOLVED IN: phenylpropanoid metabolic process, proteolysis; L…	Alpha/Beta hydrolase fold | Peptidase S10, serine carboxypeptidase
2.45364	3.25721	AT2G27530	3(-4)-4(0)	A	GTAG	GTAG	Ribosomal protein L1p/L10e family	PIGGYBACK1 (PGY1); FUNCTIONS IN: structural constituent of ribosome, RNA binding; INVOLVED IN: adaxial/abaxial pattern formation, post-embryonic organ development, translation; LOCATED IN: cytosolic ribosome, cytosolic large ribosomal subunit, large ribosomal subunit; EXPRESSED IN: 24 plant structures; EXPRESSED DURING: 13 growth stages; CONTAINS InterPro DOMAIN/s: Ribosomal protein L1 (InterPro:…	Ribosomal protein L1 | Ribosomal protein L1, 2-layer alpha/beta-sandwich | Ribosomal protein L1, 3-layer alpha/beta-sandwich | Ribosomal protein L1, conserved site | Ribosomal protein L1-like | Ribosomal protein L1/ribosomal biogenesis protein
3.53361	3.57825	AT2G33830	2(-6)-3(0)	A	GTAG	GTAG	Dormancy/auxin associated family protein	Dormancy/auxin associated family protein; CONTAINS InterPro DOMAIN/s: Dormancyauxin associated (InterPro:IPR008406); BEST Arabidopsis thaliana protein match is: dormancy-associated protein-like 1 (TAIR:AT1G28330.1)	Dormancyauxin associated
2.18703	3.00088	AT2G43010	6(0)-7(-6)	A	GTAG	GTAG	phytochrome interacting factor 4	phytochrome interacting factor 4 (PIF4); CONTAINS InterPro DOMAIN/s: Helix-loop-helix DNA-binding domain (InterPro:IPR001092), Helix-loop-helix DNA-binding (InterPro:IPR011598); BEST Arabidopsis thaliana protein match is: phytochrome interacting factor 3-like 6 (TAIR:AT3G59060.1)	Myc-type, basic helix-loop-helix (bHLH) domain
2.61861	3.64837	AT2G47940	9(-8)-10(0)	A	GTAG	GTAG	DEGP protease 2	DEGP protease 2 (DEGP2); FUNCTIONS IN: serine-type peptidase activity, serine-type endopeptidase activity; INVOLVED IN: photosystem II repair, proteolysis; LOCATED IN: chloroplast stromal thylakoid, chloroplast thylakoid membrane, chloroplast; LOCATED IN: chloroplast stromal thylakoid, chloroplast thylakoid membrane, chloroplast stroma, chloroplast; EXPRESSED IN: 22 plant structures; EXPRESSED DU…	PDZ domain | Peptidase S1 | Peptidase S1C | Trypsin-like cysteine/serine peptidase domain
2.25808	3.03754	AT3G15520	4(0)-5(+5)	D	GTAG	GTAG	Cyclophilin-like peptidyl-prolyl cis-trans isomerase family protein	Cyclophilin-like peptidyl-prolyl cis-trans isomerase family protein; FUNCTIONS IN: peptidyl-prolyl cis-trans isomerase activity; INVOLVED IN: protein folding; LOCATED IN: thylakoid, thylakoid lumen, chloroplast thylakoid membrane, chloroplast thylakoid lumen, chloroplast; EXPRESSED IN: 22 plant structures; EXPRESSED DURING: 14 growth stages; CONTAINS InterPro DOMAIN/s: Cyclophilin-like (InterPro:…	Cyclophilin-like domain | Cyclophilin-type peptidyl-prolyl cis-trans isomerase domain
2.41612	2.37864	AT3G19800	1(0)-2(-9)	A	GTAG	GTAG	Protein of unknown function (DUF177)	Protein of unknown function (DUF177); FUNCTIONS IN: molecular_function unknown; INVOLVED IN: biological_process unknown; LOCATED IN: cellular_component unknown; EXPRESSED IN: 21 plant structures; EXPRESSED DURING: 13 growth stages; CONTAINS InterPro DOMAIN/s: Protein of unknown function DUF177 (InterPro:IPR003772)	Protein of unknown function DUF177
3.72296	3.8448	AT3G45900	1(-3)-2(0)	A	GTAG	GTAG	Ribonuclease P protein subunit P38-related	Ribonuclease P protein subunit P38-related; BEST Arabidopsis thaliana protein match is: Ribonuclease P protein subunit P38-related (TAIR:AT5G53020.1)
3.50547	4.14282	AT3G54440	5(+926)-6(0)	A	GTAG	GTAG	glycoside hydrolase family 2 protein	glycoside hydrolase family 2 protein; FUNCTIONS IN: carbohydrate binding, cation binding, beta-galactosidase activity, hydrolase activity, hydrolyzing O-glycosyl compounds, catalytic activity; INVOLVED IN: carbohydrate metabolic process; EXPRESSED IN: male gametophyte, guard cell; LOCATED IN: chloroplast; CONTAINS InterPro DOMAIN/s: Glycoside hydrolase family 2, immunoglobulin-like beta-sandwich …	Beta galactosidase small chain/ domain 5 | Galactose mutarotase-like domain | Galactose-binding domain-like | Glycoside hydrolase, catalytic domain | Glycoside hydrolase, family 2 | Glycoside hydrolase, family 2, TIM barrel | Glycoside hydrolase, family 2, active site | Glycoside hydrolase, family 2, conserved site | Glycoside hydrolase, family 2, immunoglobulin-like beta-sandwich | Glycoside hyd…
3.63101	4.28159	AT3G61080	5(0)-6(-10)	A	GTAG	GTAG	Protein kinase superfamily protein	Protein kinase superfamily protein; FUNCTIONS IN: kinase activity; INVOLVED IN: biological_process unknown; LOCATED IN: mitochondrion, chloroplast; EXPRESSED IN: 23 plant structures; EXPRESSED DURING: 13 growth stages; CONTAINS InterPro DOMAIN/s: Fructosamine/Ketosamine-3-kinase (InterPro:IPR016477), Protein kinase-like domain (InterPro:IPR011009)	Fructosamine/Ketosamine-3-kinase | Protein kinase-like domain
3.02124	14.0541	AT3G62120	3(-5)-4(0)	A	GTAG	GTAG	Class II aaRS and biotin synthetases superfamily protein	Class II aaRS and biotin synthetases superfamily protein; FUNCTIONS IN: proline-tRNA ligase activity, aminoacyl-tRNA ligase activity, nucleotide binding, ATP binding; INVOLVED IN: prolyl-tRNA aminoacylation, translation, tRNA aminoacylation for protein translation; LOCATED IN: membrane; EXPRESSED IN: 22 plant structures; EXPRESSED DURING: 13 growth stages; CONTAINS InterPro DOMAIN/s: Aminoacyl-tR…	Aminoacyl-tRNA synthetase, class II | Aminoacyl-tRNA synthetase, class II (G/ H/ P/ S), conserved domain | Anticodon-binding | Proline-tRNA ligase, class II, C-terminal | Proline-tRNA ligase, class IIa | Proline-tRNA ligase, class IIa, archaeal-type | Prolyl-tRNA synthetase, class II
2.62331	2.55812	AT4G11980	4(-7)-5(0)	A	GTAG	GTAG	nudix hydrolase homolog 14	nudix hydrolase homolog 14 (NUDX14); FUNCTIONS IN: hydrolase activity, ADP-sugar diphosphatase activity, ADP-ribose pyrophosphohydrolase activity, ADP-glucose pyrophosphohydrolase activity; INVOLVED IN: biological_process unknown; LOCATED IN: chloroplast; EXPRESSED IN: 22 plant structures; EXPRESSED DURING: 13 growth stages; CONTAINS InterPro DOMAIN/s: NUDIX hydrolase domain-like (InterPro:IPR015…	NUDIX hydrolase domain | NUDIX hydrolase domain-like
2.418	2.34585	AT4G13100	1(-9)-2(0)	A	GTAG	GTAG	RING/U-box superfamily protein	RING/U-box superfamily protein; CONTAINS InterPro DOMAIN/s: Zinc finger, RING-type (InterPro:IPR001841); BEST Arabidopsis thaliana protein match is: RING/U-box superfamily protein (TAIR:AT3G25030.2)	Zinc finger, RING-type | Zinc finger, RING/FYVE/PHD-type
3.09344	4.26052	AT4G15570	7(0)-8(-10)	A	GTAG	GTAG	P-loop containing nucleoside triphosphate hydrolases superfamily protein	MAGATAMA 3 (MAA3); FUNCTIONS IN: molecular_function unknown; INVOLVED IN: pollen-pistil interaction, pollen tube guidance, embryo sac development; LOCATED IN: cellular_component unknown; EXPRESSED IN: 23 plant structures; EXPRESSED DURING: 13 growth stages; CONTAINS InterPro DOMAIN/s: DEAD-like helicase, N-terminal (InterPro:IPR014001); BEST Arabidopsis thaliana protein match is: P-loop containin…	Helicase Sen1-like | Helicase, superfamily 1/2, ATP-binding domain | P-loop containing nucleoside triphosphate hydrolase
2.69095	2.30735	AT4G22890	1(0)-2(-6)	A	GTAG	GTAG	PGR5-LIKE A	PGR5-LIKE A; FUNCTIONS IN: molecular_function unknown; INVOLVED IN: photosynthetic electron transport in photosystem I, photosynthesis; LOCATED IN: thylakoid, chloroplast thylakoid membrane, chloroplast; EXPRESSED IN: 22 plant structures; EXPRESSED DURING: 13 growth stages; BEST Arabidopsis thaliana protein match is: PGR5-like B (TAIR:AT4G11960.1)
2.23972	2.20911	AT4G26555	6(+7)-7(+9)	D	GTAG	GTAG	FKBP-like peptidyl-prolyl cis-trans isomerase family protein	FKBP-like peptidyl-prolyl cis-trans isomerase family protein; FUNCTIONS IN: FK506 binding, peptidyl-prolyl cis-trans isomerase activity; INVOLVED IN: protein folding; LOCATED IN: chloroplast; EXPRESSED IN: 22 plant structures; EXPRESSED DURING: 13 growth stages; CONTAINS InterPro DOMAIN/s: Peptidyl-prolyl cis-trans isomerase, FKBP-type (InterPro:IPR001179); BEST Arabidopsis thaliana protein match…	Peptidyl-prolyl cis-trans isomerase, FKBP-type | Peptidyl-prolyl cis-trans isomerase, FKBP-type, domain
3.63933	5.65673	AT4G28880	8(0)-9(-13)	A	GTAG	GTAG	casein kinase I-like 3	casein kinase I-like 3 (ckl3); FUNCTIONS IN: protein serine/threonine kinase activity, protein kinase activity, kinase activity, ATP binding; INVOLVED IN: protein amino acid phosphorylation; LOCATED IN: cellular_component unknown; CONTAINS InterPro DOMAIN/s: Protein kinase, ATP binding site (InterPro:IPR017441), Protein kinase, catalytic domain (InterPro:IPR000719), Serine/threonine-protein kinas…	Protein kinase domain | Protein kinase, ATP binding site | Protein kinase-like domain | Serine/threonine-protein kinase, active site
3.12309	5.54198	AT4G36850	5(-4)-6(0)	A	GTAG	GTAG	PQ-loop repeat family protein / transmembrane family protein	PQ-loop repeat family protein / transmembrane family protein; CONTAINS InterPro DOMAIN/s: Cystinosin/ERS1p repeat (InterPro:IPR006603); BEST Arabidopsis thaliana protein match is: PQ-loop repeat family protein / transmembrane family protein (TAIR:AT2G41050.1)	PQ-loop repeat
2.01817	3.37915	AT5G06580	11(+7)-12(0)	A	GTAG	GTAG	FAD-linked oxidases family protein	FAD-linked oxidases family protein; FUNCTIONS IN: glycolate oxidase activity, glycolate dehydrogenase activity, D-lactate dehydrogenase (cytochrome) activity, ATP binding; LOCATED IN: mitochondrion; EXPRESSED IN: 22 plant structures; EXPRESSED DURING: 13 growth stages; CONTAINS InterPro DOMAIN/s: FAD-linked oxidase, FAD-binding, subdomain 2 (InterPro:IPR016168), FAD-binding, type 2 (InterPro:IPR0…	CO dehydrogenase flavoprotein-like, FAD-binding, subdomain 2 | FAD linked oxidase, N-terminal | FAD-binding, type 2 | FAD-binding, type 2, subdomain 1 | FAD-linked oxidase, C-terminal | FAD-linked oxidase-like, C-terminal | Vanillyl-alcohol oxidase, C-terminal subdomain 2
3.76083	5.09061	AT5G24450	11(0)-12(-10)	A	GTAG	GTAG	Transcription factor IIIC, subunit 5	Transcription factor IIIC, subunit 5; CONTAINS InterPro DOMAIN/s: Transcription factor IIIC, subunit 5 (InterPro:IPR019136); BEST Arabidopsis thaliana protein match is: Transcription factor IIIC, subunit 5 (TAIR:AT3G49410.1)	Transcription factor IIIC, subunit 5
2.1111	2.048	AT5G42900	3(-3)-4(0)	A	GTAG	GTAG	cold regulated gene 27	cold regulated gene 27; cold regulated gene 27 (COR27); BEST Arabidopsis thaliana protein match is: unknown protein (TAIR:AT4G33980.1)
2.71758	2.04315	AT5G45940	1(-5)-2(0)	A	GTAG	GTAG	nudix hydrolase homolog 11	nudix hydrolase homolog 11 (NUDT11); CONTAINS InterPro DOMAIN/s: NUDIX hydrolase domain-like (InterPro:IPR015797), NUDIX hydrolase domain (InterPro:IPR000086); FUNCTIONS IN: hydrolase activity, NAD+ diphosphatase activity, CoA pyrophosphatase activity; BEST Arabidopsis thaliana protein match is: nudix hydrolase homolog 15 (TAIR:AT1G28960.2); INVOLVED IN: multicellular organismal development; LOCA…	NUDIX hydrolase domain | NUDIX hydrolase domain-like
2.51429	5.31529	AT5G53850	9(0)-10(+7)	D	GTAG	GTAG	haloacid dehalogenase-like hydrolase family protein	haloacid dehalogenase-like hydrolase family protein; FUNCTIONS IN: hydrolase activity, ion binding, methylthioribulose 1-phosphate dehydratase activity, metal ion binding; FUNCTIONS IN: in 7 functions; INVOLVED IN: L-methionine salvage; INVOLVED IN: L-methionine salvage from methylthioadenosine, L-methionine salvage, metabolic process; LOCATED IN: chloroplast; LOCATED IN: chloroplast stroma, chlo…	Class II aldolase/adducin N-terminal | Enolase-phosphatase E1 | HAD hydrolase, subfamily IA | HAD-like domain | Methylthioribulose-1-phosphate dehydratase | Methylthioribulose-1-phosphate dehydratase, eukaryotes | Probable bifunctional methylthioribulose-1-phosphate dehydratase/enolase-phosphatase E1
3.07429	2.76262	AT5G65640	2(0)-3(-10)	A	GTAG	GTAG	beta HLH protein 93	beta HLH protein 93 (bHLH093); FUNCTIONS IN: DNA binding, sequence-specific DNA binding transcription factor activity; INVOLVED IN: regulation of transcription; LOCATED IN: nucleus; EXPRESSED IN: 22 plant structures; EXPRESSED DURING: 13 growth stages; CONTAINS InterPro DOMAIN/s: Helix-loop-helix DNA-binding domain (InterPro:IPR001092), Helix-loop-helix DNA-binding (InterPro:IPR011598); BEST Arab…	Myc-type, basic helix-loop-helix (bHLH) domain
3.91224	3.22668	AT5G66240	8(0)-9(-6)	A	GTAG	GTAG	Transducin/WD40 repeat-like superfamily protein	Transducin/WD40 repeat-like superfamily protein; CONTAINS InterPro DOMAIN/s: WD40 repeat 2 (InterPro:IPR019782), WD40 repeat-like-containing domain (InterPro:IPR011046), WD40-repeat-containing domain (InterPro:IPR017986), WD40/YVTN repeat-like-containing domain (InterPro:IPR015943), WD40 repeat (InterPro:IPR001680), WD40 repeat, subgroup (InterPro:IPR019781), G-protein beta WD-40 repeat, region (…	G-protein beta WD-40 repeat | WD40 repeat | WD40-repeat-containing domain | WD40/YVTN repeat-like-containing domain

## Sheet: Share_FC<=0.5
M_foldChange	BC_foldChange	GeneID	Splice1	Donor/Acceptor Change	T	prp18a-1	description	comp_description	IPR_domain
0.220343	0.164376	AT1G02500	1(0)-2(0)	A	GTAG	GTAG	S-adenosylmethionine synthetase 1	S-adenosylmethionine synthetase 1 (SAM1); FUNCTIONS IN: methionine adenosyltransferase activity; INVOLVED IN: response to cadmium ion, response to salt stress, ethylene biosynthetic process, S-adenosylmethionine biosynthetic process; LOCATED IN: cell wall, plasma membrane, membrane; EXPRESSED IN: 30 plant structures; EXPRESSED DURING: 17 growth stages; CONTAINS InterPro DOMAIN/s: S-adenosylmethio…	S-adenosylmethionine synthetase | S-adenosylmethionine synthetase superfamily | S-adenosylmethionine synthetase, C-terminal | S-adenosylmethionine synthetase, N-terminal | S-adenosylmethionine synthetase, central domain | S-adenosylmethionine synthetase, conserved site
0.23234	0.283714	AT1G05030	5(0)-6(0)	D	GTAG	GTAG	Major facilitator superfamily protein	Major facilitator superfamily protein; FUNCTIONS IN: carbohydrate transmembrane transporter activity, sugar:hydrogen symporter activity; INVOLVED IN: transport, transmembrane transport; LOCATED IN: mitochondrion, integral to membrane, membrane; EXPRESSED IN: 22 plant structures; EXPRESSED DURING: 13 growth stages; CONTAINS InterPro DOMAIN/s: Sugar transporter, conserved site (InterPro:IPR005829),…	General substrate transporter | Major facilitator superfamily domain | Major facilitator superfamily domain, general substrate transporter | Sugar transporter, conserved site | Sugar/inositol transporter
0.317023	0.252777	AT1G08680	7(0)-8(0)	A	GTAG	GTAG	ARF GAP-like zinc finger-containing protein ZIGA4	ARF GAP-like zinc finger-containing protein ZIGA4 (ZIGA4); FUNCTIONS IN: ARF GTPase activator activity, DNA binding, zinc ion binding; INVOLVED IN: regulation of ARF GTPase activity; LOCATED IN: nucleus; LOCATED IN: nucleus, plasma membrane; EXPRESSED IN: 22 plant structures; EXPRESSED IN: 23 plant structures; EXPRESSED DURING: 13 growth stages; CONTAINS InterPro DOMAIN/s: Arf GTPase activating p…	Arf GTPase activating protein
0.477814	0.374725	AT1G10820	5(0)-6(0)	D/A	GTAG	GTAG	Protein of unknown function (DUF3755)	Protein of unknown function (DUF3755); CONTAINS InterPro DOMAIN/s: Protein of unknown function DUF3755 (InterPro:IPR022228); BEST Arabidopsis thaliana protein match is: Protein of unknown function (DUF3755) (TAIR:AT1G60670.2)	Homeodomain-like | Protein of unknown function DUF3755
0.492739	0.459753	AT1G10910	3(0)-4(0)	A	GTAG	GTAG	Pentatricopeptide repeat (PPR) superfamily protein	Pentatricopeptide repeat (PPR) superfamily protein; CONTAINS InterPro DOMAIN/s: Pentatricopeptide repeat (InterPro:IPR002885); BEST Arabidopsis thaliana protein match is: plastid transcriptionally active 2 (TAIR:AT1G74850.1)	Pentatricopeptide repeat
0.348438	0.374677	AT1G16180	1(0)-2(0)	A	GTAG	GTAG	Serinc-domain containing serine and sphingolipid biosynthesis protein	Serinc-domain containing serine and sphingolipid biosynthesis protein; FUNCTIONS IN: molecular_function unknown; LOCATED IN: endomembrane system, membrane; EXPRESSED IN: 23 plant structures; EXPRESSED DURING: 15 growth stages; CONTAINS InterPro DOMAIN/s: TMS membrane protein/tumour differentially expressed protein (InterPro:IPR005016); BEST Arabidopsis thaliana protein match is: Serinc-domain con…	Serine incorporator/TMS membrane protein
0.138827	0.127666	AT1G16650	6(0)-7(0)	A	GTAG	GTAG	S-adenosyl-L-methionine-dependent methyltransferases superfamily protein	S-adenosyl-L-methionine-dependent methyltransferases superfamily protein	Methyltransferase domain | S-adenosyl-L-methionine-dependent methyltransferase-like
0.302745	0.294183	AT1G18800	3(0)-4(0)	A	GTAG	GTAG	NAP1-related protein 2	NAP1-related protein 2 (NRP2); FUNCTIONS IN: chromatin binding, histone binding, DNA binding; INVOLVED IN: cell proliferation, cell differentiation, nucleosome assembly, lateral root formation; LOCATED IN: nucleus, cytoplasm; EXPRESSED IN: 24 plant structures; EXPRESSED DURING: 14 growth stages; CONTAINS InterPro DOMAIN/s: Nucleosome assembly protein (NAP) (InterPro:IPR002164); BEST Arabidopsis t…
0.364437	0.342281	AT1G22630	1(0)-2(+14)	A	GTAG	GTAG		unknown protein; LOCATED IN: chloroplast; EXPRESSED IN: 21 plant structures; EXPRESSED DURING: 13 growth stages	Heat shock protein DnaJ, cysteine-rich domain
0.120595	0.082415	AT1G22750	8(0)-9(-4)	A	GTAG	GTAG		unknown protein; CONTAINS InterPro DOMAIN/s: Protein of unknown function DUF1475 (InterPro:IPR009943); FUNCTIONS IN: molecular_function unknown; INVOLVED IN: biological_process unknown; LOCATED IN: vacuole; EXPRESSED IN: 23 plant structures; EXPRESSED DURING: 15 growth stages	Protein of unknown function DUF1475
0.33727	0.400038	AT1G22790	1(0)-2(0)	A	GTAG	GTAG		unknown protein; FUNCTIONS IN: molecular_function unknown; INVOLVED IN: biological_process unknown; LOCATED IN: plasma membrane; EXPRESSED IN: 22 plant structures; EXPRESSED DURING: 13 growth stages; BEST Arabidopsis thaliana protein match is: unknown protein (TAIR:AT1G34010.1)
0.136602	0.131238	AT1G27520	13(0)-14(0)	A	GTAG	GTAG	Glycosyl hydrolase family 47 protein	Glycosyl hydrolase family 47 protein; FUNCTIONS IN: mannosyl-oligosaccharide 1,2-alpha-mannosidase activity, alpha-mannosidase activity, calcium ion binding; INVOLVED IN: protein amino acid N-linked glycosylation; LOCATED IN: endomembrane system, membrane; EXPRESSED IN: 22 plant structures; EXPRESSED DURING: 13 growth stages; CONTAINS InterPro DOMAIN/s: Glycoside hydrolase, family 47 (InterPro:IP…	Glycoside hydrolase, family 47
0.489676	0.409778	AT1G32230	5(0)-6(0)	A	GTAG	GTAG	WWE protein-protein interaction domain protein family	RADICAL-INDUCED CELL DEATH1 (RCD1); WWE protein-protein interaction domain protein family; CONTAINS InterPro DOMAIN/s: WWE domain (InterPro:IPR004170), Poly(ADP-ribose) polymerase, catalytic domain (InterPro:IPR012317), RST domain of plant C-terminal (InterPro:IPR022003); BEST Arabidopsis thaliana protein match is: similar to RCD one 1 (TAIR:AT2G35510.1)	Poly(ADP-ribose) polymerase, catalytic domain | RST domain of plant C-terminal | WWE domain
0.318158	0.280026	AT1G35420	2(0)-3(+4)	A	GTAG	GTAG	alpha/beta-Hydrolases superfamily protein	alpha/beta-Hydrolases superfamily protein; FUNCTIONS IN: hydrolase activity; INVOLVED IN: biological_process unknown; EXPRESSED IN: 22 plant structures; LOCATED IN: chloroplast, chloroplast stroma; EXPRESSED DURING: 13 growth stages; CONTAINS InterPro DOMAIN/s: Dienelactone hydrolase (InterPro:IPR002925); BEST Arabidopsis thaliana protein match is: alpha/beta-Hydrolases superfamily protein (TAIR:…	Alpha/Beta hydrolase fold | Dienelactone hydrolase
0.299392	0.315533	AT1G59840	5(0)-6(0)	A	GTAG	GTAG	cofactor assembly of complex C	cofactor assembly of complex C (CCB4); FUNCTIONS IN: molecular_function unknown; INVOLVED IN: cytochrome b6f complex assembly; LOCATED IN: chloroplast; EXPRESSED IN: 20 plant structures; EXPRESSED DURING: 13 growth stages; CONTAINS InterPro DOMAIN/s: Protein of unknown function DUF2930 (InterPro:IPR021325)	Protein of unknown function DUF2930
0.477933	0.401549	AT1G60600	10(0)-11(0)	A	GTAG	GTAG	UbiA prenyltransferase family protein	ABERRANT CHLOROPLAST DEVELOPMENT 4 (ABC4); CONTAINS InterPro DOMAIN/s: UbiA prenyltransferase (InterPro:IPR000537), 1,4-dihydroxy-2-naphthoate phytyltransferase (InterPro:IPR011937)	1,4-dihydroxy-2-naphthoate phytyltransferase | UbiA prenyltransferase family
0.212132	0.235237	AT1G61450	2(0)-3(0)	A	GTAG	GTAG		unknown protein; BEST Arabidopsis thaliana protein match is: unknown protein (TAIR:AT1G61415.1)
0.233131	0.243192	AT1G64430	4(0)-5(+22)	A	GTAG	GTAG	Pentatricopeptide repeat (PPR) superfamily protein	Pentatricopeptide repeat (PPR) superfamily protein; CONTAINS InterPro DOMAIN/s: Pentatricopeptide repeat (InterPro:IPR002885)	Pentatricopeptide repeat
0.351169	0.323904	AT1G68890	9(0)-10(0)	A	GTAG	GTAG	magnesium ion binding;thiamin pyrophosphate binding;hydro-lyases;catalytics;2-succinyl-5-enolpyruvyl-6-hydroxy-3-cyclohexene-1-carboxylic-acid synthases	magnesium ion binding;thiamin pyrophosphate binding;hydro-lyases;catalytics;2-succinyl-5-enolpyruvyl-6-hydroxy-3-cyclohexene-1-carboxylic-acid synthases; FUNCTIONS IN: 2-succinyl-5-enolpyruvyl-6-hydroxy-3-cyclohexene-1-carboxylic-acid synthase activity, hydro-lyase activity, magnesium ion binding, thiamin pyrophosphate binding, catalytic activity; INVOLVED IN: phylloquinone biosynthetic process, …	Alpha/Beta hydrolase fold | DHS-like NAD/FAD-binding domain | Enolase C-terminal domain-like | Enolase N-terminal domain-like | Mandelate racemase/muconate lactonizing enzyme, C-terminal | Mandelate racemase/muconate lactonizing enzyme, conserved site | Menaquinone biosynthesis protein MenD | O-succinylbenzoic acid (OSB) synthetase | Thiamin diphosphate-binding fold | Thiamine pyrophosphate enzym…
0.208046	0.193757	AT1G71720	1(-4)-2(0)	D	GCAG	GCAG	Nucleic acid-binding proteins superfamily	Nucleic acid-binding proteins superfamily; FUNCTIONS IN: RNA binding; LOCATED IN: chloroplast; EXPRESSED IN: 22 plant structures; EXPRESSED DURING: 13 growth stages; CONTAINS InterPro DOMAIN/s: Nucleic acid-binding, OB-fold-like (InterPro:IPR016027), Nucleic acid-binding, OB-fold (InterPro:IPR012340), Ribosomal protein S1, RNA-binding domain (InterPro:IPR003029); BEST Arabidopsis thaliana protein…	Nucleic acid-binding, OB-fold | RNA-binding domain, S1 | Ribosomal protein S1, RNA-binding domain
0.343525	0.483747	AT1G72640	7(0)-8(0)	A	GTAG	GTAG	NAD(P)-binding Rossmann-fold superfamily protein	NAD(P)-binding Rossmann-fold superfamily protein; FUNCTIONS IN: binding, catalytic activity; INVOLVED IN: metabolic process; LOCATED IN: chloroplast thylakoid membrane, chloroplast; CONTAINS InterPro DOMAIN/s: NAD(P)-binding domain (InterPro:IPR016040)	NAD(P)-binding domain
0.457697	0.302215	AT1G72640	3(0)-4(0)	A	GTAG	GTAG	NAD(P)-binding Rossmann-fold superfamily protein	NAD(P)-binding Rossmann-fold superfamily protein; FUNCTIONS IN: binding, catalytic activity; INVOLVED IN: metabolic process; LOCATED IN: chloroplast thylakoid membrane, chloroplast; CONTAINS InterPro DOMAIN/s: NAD(P)-binding domain (InterPro:IPR016040)	NAD(P)-binding domain
0.340994	0.36992	AT1G74960	1(-32)-2(-140)	A	GTAG	GTAG	fatty acid biosynthesis 1	fatty acid biosynthesis 1 (FAB1); CONTAINS InterPro DOMAIN/s: Beta-ketoacyl synthase (InterPro:IPR000794), Thiolase-like (InterPro:IPR016039), Beta-ketoacyl synthase, C-terminal (InterPro:IPR014031), 3-oxoacyl-[acyl-carrier-protein] synthase 2 (InterPro:IPR017568), Beta-ketoacyl synthase, N-terminal (InterPro:IPR014030), Thiolase-like, subgroup (InterPro:IPR016038), Beta-ketoacyl synthase, active…	3-oxoacyl-[acyl-carrier-protein] synthase 2 | Beta-ketoacyl synthase, C-terminal | Beta-ketoacyl synthase, N-terminal | Beta-ketoacyl synthase, active site | Thiolase-like | Thiolase-like, subgroup
0.280872	0.237681	AT1G79830	19(0)-20(0)	A	GTAG	GTAG	golgin candidate 5	golgin candidate 5 (GC5); FUNCTIONS IN: protein binding; INVOLVED IN: biological_process unknown; LOCATED IN: Golgi apparatus, cytoplasm; LOCATED IN: Golgi apparatus, nucleus, cytoplasm; EXPRESSED IN: 24 plant structures; EXPRESSED IN: 25 plant structures; EXPRESSED DURING: 15 growth stages; CONTAINS InterPro DOMAIN/s: TATA element modulatory factor 1 DNA binding (InterPro:IPR022092), TATA elemen…	TATA element modulatory factor 1 DNA binding | TATA element modulatory factor 1 TATA binding
0.18733	0.203893	AT1G79880	9(0)-10(0)	A	GTAG	GTAG	RNA recognition motif (RRM)-containing protein	RNA recognition motif (RRM)-containing protein; FUNCTIONS IN: RNA binding, nucleotide binding, nucleic acid binding; FUNCTIONS IN: nucleotide binding, nucleic acid binding; EXPRESSED IN: 22 plant structures; INVOLVED IN: RNA processing; EXPRESSED DURING: 13 growth stages; LOCATED IN: ribonucleoprotein complex, nucleus; CONTAINS InterPro DOMAIN/s: RNA recognition motif, RNP-1 (InterPro:IPR000504),…	Lupus La protein | Nucleotide-binding, alpha-beta plait | RNA recognition motif domain | RNA-binding motif | RNA-binding protein Lupus La | Winged helix-turn-helix DNA-binding domain
0.299582	0.382794	AT2G01220	9(0)-10(+14)	A	GTAG	GTAG	Nucleotidylyl transferase superfamily protein	Nucleotidylyl transferase superfamily protein; FUNCTIONS IN: nucleotidyltransferase activity; INVOLVED IN: biosynthetic process; LOCATED IN: chloroplast envelope; EXPRESSED IN: 23 plant structures; EXPRESSED DURING: 13 growth stages; CONTAINS InterPro DOMAIN/s: Rossmann-like alpha/beta/alpha sandwich fold (InterPro:IPR014729), Cytidylyltransferase (InterPro:IPR004820); BEST Arabidopsis thaliana p…	Cytidyltransferase-like domain | Rossmann-like alpha/beta/alpha sandwich fold
0.348775	0.301656	AT2G22720	1(0)-3(0)	A	GTAG	GTAG	SPT2 chromatin protein	SPT2 chromatin protein; CONTAINS InterPro DOMAIN/s: Chromatin SPT2 (InterPro:IPR013256); FUNCTIONS IN: molecular_function unknown; BEST Arabidopsis thaliana protein match is: SPT2 chromatin protein (TAIR:AT4G37860.1); INVOLVED IN: biological_process unknown; LOCATED IN: chloroplast; EXPRESSED IN: 24 plant structures; EXPRESSED DURING: 15 growth stages	Chromatin SPT2
0.345396	0.273117	AT2G22980	1(0)-2(0)	D	GTAG	GTAG	serine carboxypeptidase-like 13	serine carboxypeptidase-like 13 (SCPL13); FUNCTIONS IN: serine-type carboxypeptidase activity; INVOLVED IN: proteolysis; LOCATED IN: endomembrane system; EXPRESSED IN: 23 plant structures; EXPRESSED DURING: 13 growth stages; CONTAINS InterPro DOMAIN/s: Peptidase S10, serine carboxypeptidase (InterPro:IPR001563); BEST Arabidopsis thaliana protein match is: serine carboxypeptidase-like 11 (TAIR:AT2…	Alpha/Beta hydrolase fold | Peptidase S10, serine carboxypeptidase
0.370301	0.33667	AT2G23985	1(0)-2(0)	A	GTAG	GTAG		unknown protein
0.400637	0.382087	AT2G29310	1(0)-2(0)	A	GTAG	GTAG	NAD(P)-binding Rossmann-fold superfamily protein	NAD(P)-binding Rossmann-fold superfamily protein; FUNCTIONS IN: oxidoreductase activity, binding, catalytic activity; INVOLVED IN: oxidation reduction, metabolic process; EXPRESSED IN: 22 plant structures; LOCATED IN: endomembrane system; EXPRESSED DURING: 13 growth stages; CONTAINS InterPro DOMAIN/s: NAD(P)-binding domain (InterPro:IPR016040), Glucose/ribitol dehydrogenase (InterPro:IPR002347), …	Glucose/ribitol dehydrogenase | NAD(P)-binding domain | Short-chain dehydrogenase/reductase SDR
0.377141	0.265054	AT2G32000	12(0)-13(0)	A	GTAG	GTAG	DNA topoisomerase, type IA, core	DNA topoisomerase, type IA, core; FUNCTIONS IN: DNA topoisomerase activity, DNA topoisomerase type I activity, DNA binding, nucleic acid binding; INVOLVED IN: DNA topological change, DNA unwinding involved in replication, DNA metabolic process; LOCATED IN: endomembrane system, chromosome; EXPRESSED IN: 22 plant structures; EXPRESSED DURING: 13 growth stages; CONTAINS InterPro DOMAIN/s: DNA topois…	DNA topoisomerase, type IA | DNA topoisomerase, type IA, DNA-binding domain | DNA topoisomerase, type IA, active site | DNA topoisomerase, type IA, central | DNA topoisomerase, type IA, central region, subdomain 1 | DNA topoisomerase, type IA, central region, subdomain 2 | DNA topoisomerase, type IA, core domain | DNA topoisomerase, type IA, domain 2 | Toprim domain
0.331832	0.33686	AT2G32700	11(0)-12(0)	A	GTAG	GTAG	LEUNIG_homolog	LEUNIG_homolog (LUH); FUNCTIONS IN: molecular_function unknown; INVOLVED IN: flower development, negative regulation of transcription, embryo development; LOCATED IN: cellular_component unknown; EXPRESSED IN: 22 plant structures; EXPRESSED DURING: 13 growth stages; CONTAINS InterPro DOMAIN/s: LisH dimerisation motif, subgroup (InterPro:IPR013720), WD40 repeat 2 (InterPro:IPR019782), WD40 repeat, …	G-protein beta WD-40 repeat | LisH dimerisation motif | LisH dimerisation motif, subgroup | WD40 repeat | WD40 repeat, conserved site | WD40-repeat-containing domain | WD40/YVTN repeat-like-containing domain
0.295217	0.314808	AT2G32760	1(0)-2(0)	A	GTAG	GTAG		unknown protein	UV radiation resistance protein/autophagy-related protein 14
0.309399	0.313928	AT2G45070	1(0)-3(0)	A	GTAG	GTAG	Preprotein translocase Sec, Sec61-beta subunit protein	SUPPRESSORS OF SECRETION-DEFECTIVE 61 BETA (SEC61 BETA); FUNCTIONS IN: protein transporter activity; INVOLVED IN: protein transport; EXPRESSED IN: 24 plant structures; EXPRESSED DURING: 15 growth stages; CONTAINS InterPro DOMAIN/s: Preprotein translocase Sec, Sec61-beta subunit, eukarya (InterPro:IPR016482), Preprotein translocase Sec, Sec61-beta subunit (InterPro:IPR005609); BEST Arabidopsis tha…	Protein transport protein SecG/Sec61-beta/Sbh1
0.412745	0.301686	AT2G47640	3(0)-4(0)	A	GTAG	GTAG	Small nuclear ribonucleoprotein family protein	Small nuclear ribonucleoprotein family protein; CONTAINS InterPro DOMAIN/s: Like-Sm ribonucleoprotein (LSM) domain (InterPro:IPR001163), Like-Sm ribonucleoprotein (LSM) domain, eukaryotic/archaea-type (InterPro:IPR006649), Like-Sm ribonucleoprotein (LSM)-related domain (InterPro:IPR010920); FUNCTIONS IN: molecular_function unknown; BEST Arabidopsis thaliana protein match is: Small nuclear ribonuc…	Like-Sm (LSM) domain | Ribonucleoprotein LSM domain | Ribonucleoprotein LSM domain, eukaryotic/archaea-type | Small nuclear ribonucleoprotein Sm D2
0.318482	0.35401	AT3G01500	1(-22)-2(0)	D/A	GTAG	GTAG	carbonic anhydrase 1	carbonic anhydrase 1 (CA1); FUNCTIONS IN: carbonate dehydratase activity, zinc ion binding; INVOLVED IN: in 6 processes; LOCATED IN: in 7 components; LOCATED IN: in 8 components; EXPRESSED IN: 22 plant structures; EXPRESSED IN: 23 plant structures; EXPRESSED DURING: 14 growth stages; CONTAINS InterPro DOMAIN/s: Carbonic anhydrase, prokaryotic-like, conserved site (InterPro:IPR015892), Carbonic an…	Carbonic anhydrase | Carbonic anhydrase, prokaryotic-like, conserved site
0.389333	0.472496	AT3G04630	3(0)-4(0)	A	GTAG	GTAG	WVD2-like 1	WVD2-like 1 (WDL1); FUNCTIONS IN: molecular_function unknown; INVOLVED IN: circumnutation, root morphogenesis; LOCATED IN: cytoplasm; EXPRESSED IN: 25 plant structures; EXPRESSED DURING: 15 growth stages; CONTAINS InterPro DOMAIN/s: Xklp2 targeting protein (InterPro:IPR009675); BEST Arabidopsis thaliana protein match is: TPX2 (targeting protein for Xklp2) protein family (TAIR:AT5G28646.2)	TPX2, C-terminal domain
0.364729	0.332204	AT3G07300	6(0)-7(-6)	D	GTAG	GTAG	NagB/RpiA/CoA transferase-like superfamily protein	NagB/RpiA/CoA transferase-like superfamily protein; FUNCTIONS IN: GTP binding, translation initiation factor activity; INVOLVED IN: translational initiation, cellular metabolic process; LOCATED IN: eukaryotic translation initiation factor 2B complex; EXPRESSED IN: 24 plant structures; EXPRESSED DURING: 15 growth stages; CONTAINS InterPro DOMAIN/s: Initiation factor 2B related (InterPro:IPR000649)…	Initiation factor 2B-related
0.253788	0.310316	AT3G07565	3(0)-4(0)	A	GTAG	GTAG	Protein of unknown function (DUF3755)	FUNCTIONS IN: DNA binding; Protein of unknown function (DUF3755); INVOLVED IN: biological_process unknown; LOCATED IN: chloroplast; EXPRESSED IN: 23 plant structures; EXPRESSED DURING: 15 growth stages; CONTAINS InterPro DOMAIN/s: Protein of unknown function DUF3755 (InterPro:IPR022228); CONTAINS InterPro DOMAIN/s: SANT, DNA-binding (InterPro:IPR001005); CONTAINS InterPro DOMAIN/s: SANT, DNA-bind…	Homeodomain-like | Protein of unknown function DUF3755 | SANT/Myb domain
0.426549	0.472778	AT3G10690	4(+3)-5(0)	A	GTAG	GTAG	DNA GYRASE A	DNA GYRASE A (GYRA); FUNCTIONS IN: DNA topoisomerase activity, catalytic activity, ATP binding; INVOLVED IN: DNA topological change, DNA metabolic process; LOCATED IN: mitochondrion, chloroplast, nucleoid; EXPRESSED IN: 22 plant structures; EXPRESSED DURING: 13 growth stages; CONTAINS InterPro DOMAIN/s: DNA gyrase, subunit A (InterPro:IPR005743), DNA topoisomerase, type IIA, subunit A/C-terminal …	Arginine repressor C-terminal-like domain | DNA gyrase, subunit A | DNA gyrase/topoisomerase IV, subunit A, C-terminal beta-pinwheel | DNA topoisomerase, type IIA, subunit A/ C-terminal, alpha-beta | DNA topoisomerase, type IIA, subunit A/C-terminal | DNA topoisomerase, type IIA-like domain
0.443184	0.410392	AT3G11620	11(-56)-12(0)	A	GTAG	GTAG	alpha/beta-Hydrolases superfamily protein	alpha/beta-Hydrolases superfamily protein; CONTAINS InterPro DOMAIN/s: Protein of unknown function DUF2305 (InterPro:IPR019363)	Alpha/Beta hydrolase fold | Protein of unknown function DUF2305
0.322975	0.356067	AT3G18380	5(0)-6(0)	D	GTAG	GTAG	sequence-specific DNA binding transcription factors;sequence-specific DNA binding	sequence-specific DNA binding transcription factors;sequence-specific DNA binding; FUNCTIONS IN: sequence-specific DNA binding, sequence-specific DNA binding transcription factor activity; INVOLVED IN: regulation of transcription, DNA-dependent; EXPRESSED IN: 22 plant structures; EXPRESSED DURING: 13 growth stages; CONTAINS InterPro DOMAIN/s: Homeobox (InterPro:IPR001356); BEST Arabidopsis thalia…	Homeobox domain | Homeodomain-like
0.127703	0.12354	AT3G18520	7(0)-8(0)	A	GTAG	GTAG	histone deacetylase 15	histone deacetylase 15 (HDA15); FUNCTIONS IN: histone deacetylase activity; INVOLVED IN: DNA mediated transformation, histone deacetylation; LOCATED IN: intracellular; EXPRESSED IN: 25 plant structures; EXPRESSED DURING: 15 growth stages; CONTAINS InterPro DOMAIN/s: Zinc finger, RanBP2-type (InterPro:IPR001876), Histone deacetylase superfamily (InterPro:IPR000286); BEST Arabidopsis thaliana prote…	Histone deacetylase domain | Histone deacetylase superfamily | Zinc finger, RanBP2-type
0.406065	0.289279	AT3G19290	5(0)-6(0)	A	GTAG	GTAG	ABRE binding factor 4	ABRE binding factor 4 (ABF4); CONTAINS InterPro DOMAIN/s: Basic-leucine zipper (bZIP) transcription factor (InterPro:IPR004827); CONTAINS InterPro DOMAIN/s: Basic-leucine zipper (bZIP) transcription factor (InterPro:IPR004827), bZIP transcription factor, bZIP-1 (InterPro:IPR011616); FUNCTIONS IN: protein binding, DNA binding, transcription activator activity, sequence-specific DNA binding transcr…	Basic-leucine zipper domain
0.37933	0.420262	AT3G20790	9(0)-10(0)	D	GCAG	GCAG	NAD(P)-binding Rossmann-fold superfamily protein	NAD(P)-binding Rossmann-fold superfamily protein; FUNCTIONS IN: oxidoreductase activity, binding, catalytic activity; INVOLVED IN: oxidation reduction, metabolic process; EXPRESSED IN: 23 plant structures; EXPRESSED DURING: 15 growth stages; CONTAINS InterPro DOMAIN/s: Oxidoreductase, N-terminal (InterPro:IPR000683), Oxidoreductase, C-terminal (InterPro:IPR004104), NAD(P)-binding domain (InterPro…	NAD(P)-binding domain | Oxidoreductase, C-terminal | Oxidoreductase, N-terminal
0.458749	0.392049	AT3G21510	5(0)-6(0)	A	GTAG	GTAG	histidine-containing phosphotransmitter 1	histidine-containing phosphotransmitter 1 (AHP1); CONTAINS InterPro DOMAIN/s: Signal transduction histidine kinase, phosphotransfer (Hpt) domain (InterPro:IPR008207); BEST Arabidopsis thaliana protein match is: histidine-containing phosphotransfer factor 5 (TAIR:AT1G03430.1)	Signal transduction histidine kinase, phosphotransfer (Hpt) domain
0.370055	0.197968	AT3G23640	1(0)-2(0)	A	GTAG	GTAG	heteroglycan glucosidase 1	heteroglycan glucosidase 1 (HGL1); FUNCTIONS IN: hydrolase activity, hydrolyzing O-glycosyl compounds; INVOLVED IN: carbohydrate metabolic process; LOCATED IN: chloroplast; EXPRESSED IN: 22 plant structures; EXPRESSED DURING: 13 growth stages; CONTAINS InterPro DOMAIN/s: Glycoside hydrolase, family 31 (InterPro:IPR000322), Glycoside hydrolase, catalytic core (InterPro:IPR017853); BEST Arabidopsis…	Aldolase-type TIM barrel | Galactose mutarotase-like domain | Glycoside hydrolase family 31, N-terminal domain | Glycoside hydrolase, family 31 | Glycoside hydrolase, superfamily
0.263643	0.382657	AT3G30720	2(0)-3(0)	A	GTAG	GTAG	qua-quine starch	QUA-QUINE STARCH (QQS)
0.455489	0.420416	AT3G46100	7(0)-8(0)	D/A	GTAG	GTAG	Histidyl-tRNA synthetase 1	Histidyl-tRNA synthetase 1 (HRS1); FUNCTIONS IN: histidine-tRNA ligase activity; INVOLVED IN: histidyl-tRNA aminoacylation; LOCATED IN: mitochondrion, chloroplast; EXPRESSED IN: 22 plant structures; EXPRESSED DURING: 13 growth stages; CONTAINS InterPro DOMAIN/s: Histidyl-tRNA synthetase, class IIa, subgroup (InterPro:IPR015807), Aminoacyl-tRNA synthetase, class II (G/ H/ P/ S), conserved domain (…	Aminoacyl-tRNA synthetase, class II | Aminoacyl-tRNA synthetase, class II (G/ H/ P/ S), conserved domain | Anticodon-binding | Histidine-tRNA ligase | Histidine-tRNA ligase/ATP phosphoribosyltransferase regulatory subunit
0.331576	0.3117	AT3G46980	7(0)-8(0)	D	GTAG	GTAG	phosphate transporter 4;3	phosphate transporter 4;3 (PHT4;3); FUNCTIONS IN: organic anion transmembrane transporter activity, carbohydrate transmembrane transporter activity, inorganic phosphate transmembrane transporter activity, sugar:hydrogen symporter activity; INVOLVED IN: transmembrane transport; LOCATED IN: membrane; EXPRESSED IN: 23 plant structures; EXPRESSED DURING: 13 growth stages; CONTAINS InterPro DOMAIN/s: …
0.115068	0.121452	AT3G49140	8(+14)-9(0)	A	GTAG	GTAG	Pentatricopeptide repeat (PPR) superfamily protein	Pentatricopeptide repeat (PPR) superfamily protein; EXPRESSED IN: 23 plant structures; EXPRESSED DURING: 13 growth stages; BEST Arabidopsis thaliana protein match is: Pentatricopeptide repeat (PPR) superfamily protein (TAIR:AT5G24060.2)	FMN-binding split barrel
0.234999	0.317116	AT3G54500	4(0)-5(0)	A	GTAG	GTAG		FUNCTIONS IN: molecular_function unknown; INVOLVED IN: biological_process unknown; LOCATED IN: cellular_component unknown; EXPRESSED IN: 22 plant structures; EXPRESSED DURING: 13 growth stages; BEST Arabidopsis thaliana protein match is: dentin sialophosphoprotein-related (TAIR:AT5G64170.1); BEST Arabidopsis thaliana protein match is: dentin sialophosphoprotein-related (TAIR:AT5G64170.2)
0.412752	0.369781	AT3G56120	4(0)-5(0)	D	TTAG	TTAG	S-adenosyl-L-methionine-dependent methyltransferases superfamily protein	S-adenosyl-L-methionine-dependent methyltransferases superfamily protein; CONTAINS InterPro DOMAIN/s: Protein of unknown function Met10 (InterPro:IPR003402); BEST Arabidopsis thaliana protein match is: Met-10+ like family protein (TAIR:AT4G27340.1)	S-adenosyl-L-methionine-dependent methyltransferase-like | tRNA (guanine(37)-N(1))-methyltransferase, eukaryotic | tRNA transferase Trm5/Tyw2
0.29131	0.278525	AT3G59040	2(+23)-3(0)	A	GTAG	GTAG	Tetratricopeptide repeat (TPR)-like superfamily protein	Tetratricopeptide repeat (TPR)-like superfamily protein; FUNCTIONS IN: molecular_function unknown; INVOLVED IN: biological_process unknown; LOCATED IN: chloroplast; LOCATED IN: endomembrane system; EXPRESSED IN: 22 plant structures; EXPRESSED DURING: 13 growth stages; CONTAINS InterPro DOMAIN/s: Pentatricopeptide repeat (InterPro:IPR002885); BEST Arabidopsis thaliana protein match is: Pentatricop…	Pentatricopeptide repeat | Tetratricopeptide-like helical domain
0.238184	0.333326	AT3G59060	5(-184)-6(0)	A	GTAG	GTAG	phytochrome interacting factor 3-like 6	phytochrome interacting factor 3-like 6 (PIL6); FUNCTIONS IN: DNA binding, sequence-specific DNA binding transcription factor activity; INVOLVED IN: red, far-red light phototransduction, ethylene biosynthetic process, circadian rhythm; LOCATED IN: nucleus; EXPRESSED IN: 18 plant structures; EXPRESSED DURING: 10 growth stages; CONTAINS InterPro DOMAIN/s: Helix-loop-helix DNA-binding domain (InterP…	Myc-type, basic helix-loop-helix (bHLH) domain
0.475825	0.450666	AT3G59330	3(+7)-4(0)	A	GTAG	GTAG	Eukaryotic protein of unknown function (DUF914)	Eukaryotic protein of unknown function (DUF914); CONTAINS InterPro DOMAIN/s: Protein of unknown function DUF914, eukaryotic (InterPro:IPR009262); BEST Arabidopsis thaliana protein match is: Eukaryotic protein of unknown function (DUF914) (TAIR:AT3G59340.1)	Solute carrier family 35 member SLC35F1/F2/F6
0.0968107	0.242485	AT3G60370	4(+5)-5(0)	A	GTAG	GTAG	FKBP-like peptidyl-prolyl cis-trans isomerase family protein	FKBP-like peptidyl-prolyl cis-trans isomerase family protein; FUNCTIONS IN: FK506 binding, oxidoreductase activity, peptidyl-prolyl cis-trans isomerase activity; INVOLVED IN: photosystem II assembly; LOCATED IN: thylakoid, thylakoid lumen, chloroplast thylakoid lumen, chloroplast; EXPRESSED IN: 20 plant structures; EXPRESSED DURING: 13 growth stages; CONTAINS InterPro DOMAIN/s: Peptidyl-prolyl ci…	Peptidyl-prolyl cis-trans isomerase, FKBP-type | Peptidyl-prolyl cis-trans isomerase, FKBP-type, domain
0.339337	0.380223	AT3G61420	7(+26)-8(0)	A	GTAG	GTAG	BSD domain (BTF2-like transcription factors, Synapse-associated proteins and DOS2-like proteins)	BSD domain (BTF2-like transcription factors, Synapse-associated proteins and DOS2-like proteins); CONTAINS InterPro DOMAIN/s: Kelch related (InterPro:IPR013089), BSD (InterPro:IPR005607); BEST Arabidopsis thaliana protein match is: BSD domain (BTF2-like transcription factors, Synapse-associated proteins and DOS2-like proteins) (TAIR:AT1G55750.1)	BSD | Pleckstrin homology-like domain | TFIIH subunit Tfb1/p62
0.251606	0.290671	AT4G01330	6(0)-7(0)	A	GTAG	GTAG	Protein kinase superfamily protein	Protein kinase superfamily protein; FUNCTIONS IN: protein serine/threonine kinase activity, protein kinase activity, kinase activity, ATP binding; INVOLVED IN: protein amino acid phosphorylation; EXPRESSED IN: 22 plant structures; LOCATED IN: plasma membrane; EXPRESSED DURING: 13 growth stages; EXPRESSED IN: 23 plant structures; CONTAINS InterPro DOMAIN/s: Protein kinase, ATP binding site (InterP…	Protein kinase domain | Protein kinase, ATP binding site | Protein kinase-like domain | Serine/threonine-protein kinase, active site
0.208874	0.267731	AT4G02880	3(0)-4(0)	A	GTAG	GTAG		unknown protein; FUNCTIONS IN: molecular_function unknown; INVOLVED IN: biological_process unknown; LOCATED IN: cellular_component unknown; EXPRESSED IN: 24 plant structures; EXPRESSED DURING: 15 growth stages; BEST Arabidopsis thaliana protein match is: unknown protein (TAIR:AT1G03290.2)
0.208251	0.275263	AT4G03110	2(0)-3(0)	A	GTAG	GTAG	RNA-binding protein-defense related 1	RNA-binding protein-defense related 1 (RBP-DR1); FUNCTIONS IN: RNA binding, nucleotide binding, nucleic acid binding; INVOLVED IN: plant-type hypersensitive response, positive regulation of salicylic acid mediated signaling pathway; LOCATED IN: cytoplasm; EXPRESSED IN: 24 plant structures; EXPRESSED DURING: 15 growth stages; CONTAINS InterPro DOMAIN/s: RNA recognition motif, RNP-1 (InterPro:IPR00…	Nucleotide-binding, alpha-beta plait | Paraneoplastic encephalomyelitis antigen | RNA recognition motif domain
0.206995	0.35297	AT4G03250	3(0)-4(0)	A	GTAG	GTAG	Homeodomain-like superfamily protein	Homeodomain-like superfamily protein; FUNCTIONS IN: DNA binding, sequence-specific DNA binding transcription factor activity; INVOLVED IN: regulation of transcription, DNA-dependent, regulation of transcription; LOCATED IN: nucleus; CONTAINS InterPro DOMAIN/s: Homeobox (InterPro:IPR001356), Homeodomain-like (InterPro:IPR009057), Homeodomain-related (InterPro:IPR012287); BEST Arabidopsis thaliana …	Homeobox domain | Homeodomain-like
0.37248	0.32055	AT4G08390	10(0)-11(0)	A	GTAG	GTAG	stromal ascorbate peroxidase	stromal ascorbate peroxidase (SAPX); FUNCTIONS IN: L-ascorbate peroxidase activity; INVOLVED IN: oxidation reduction, response to oxidative stress; INVOLVED IN: response to oxidative stress, oxidation reduction; LOCATED IN: mitochondrion, chloroplast stroma; LOCATED IN: mitochondrion, chloroplast stroma, chloroplast, membrane; EXPRESSED IN: 22 plant structures; EXPRESSED DURING: 14 growth stages;…	Haem peroxidase | Haem peroxidase, plant/fungal/bacterial | Peroxidases heam-ligand binding site | Plant ascorbate peroxidase
0.174122	0.208919	AT4G11960	9(0)-10(-4)	D	GCAG	GCAG	PGR5-like B	PGR5-like B (PGRL1B); FUNCTIONS IN: molecular_function unknown; INVOLVED IN: photosynthetic electron transport in photosystem I, photosynthesis; LOCATED IN: chloroplast thylakoid membrane; EXPRESSED IN: 22 plant structures; EXPRESSED DURING: 13 growth stages; BEST Arabidopsis thaliana protein match is: PGR5-LIKE A (TAIR:AT4G22890.2); BEST Arabidopsis thaliana protein match is: PGR5-LIKE A (TAIR:A…
0.413793	0.423512	AT4G11980	4(0)-5(0)	A	GTAG	GTAG	nudix hydrolase homolog 14	nudix hydrolase homolog 14 (NUDX14); FUNCTIONS IN: hydrolase activity, ADP-sugar diphosphatase activity, ADP-ribose pyrophosphohydrolase activity, ADP-glucose pyrophosphohydrolase activity; INVOLVED IN: biological_process unknown; LOCATED IN: chloroplast; EXPRESSED IN: 22 plant structures; EXPRESSED DURING: 13 growth stages; CONTAINS InterPro DOMAIN/s: NUDIX hydrolase domain-like (InterPro:IPR015…	NUDIX hydrolase domain | NUDIX hydrolase domain-like
0.0178959	0.0382258	AT4G13670	1(+25)-2(0)	D	GCAG	GCAG	plastid transcriptionally active 5	plastid transcriptionally active 5 (PTAC5); FUNCTIONS IN: unfolded protein binding, heat shock protein binding; INVOLVED IN: protein folding, metabolic process; LOCATED IN: plastid chromosome, chloroplast thylakoid membrane, chloroplast, nucleoid, chloroplast envelope; EXPRESSED IN: 21 plant structures; EXPRESSED DURING: 13 growth stages; CONTAINS InterPro DOMAIN/s: Peptidoglycan binding-like (In…	Heat shock protein DnaJ, cysteine-rich domain | Peptidoglycan binding-like
0.236891	0.279538	AT4G17150	2(0)-3(0)	D	GCAG	GCAG	alpha/beta-Hydrolases superfamily protein	alpha/beta-Hydrolases superfamily protein; FUNCTIONS IN: molecular_function unknown; INVOLVED IN: biological_process unknown; LOCATED IN: cellular_component unknown; EXPRESSED IN: 15 plant structures; EXPRESSED DURING: 12 growth stages; BEST Arabidopsis thaliana protein match is: alpha/beta-Hydrolases superfamily protein (TAIR:AT4G14290.1)	Alpha/Beta hydrolase fold | Alpha/beta hydrolase fold-5
0.459763	0.385916	AT4G18975	7(-27)-8(0)	A	GTAG	GTAG	Pentatricopeptide repeat (PPR) superfamily protein	Pentatricopeptide repeat (PPR) superfamily protein; FUNCTIONS IN: molecular_function unknown; INVOLVED IN: biological_process unknown; EXPRESSED IN: 23 plant structures; LOCATED IN: endomembrane system; EXPRESSED DURING: 13 growth stages; BEST Arabidopsis thaliana protein match is: Pentatricopeptide repeat (PPR) superfamily protein (TAIR:AT4G21190.1)	Pentatricopeptide repeat
0.172859	0.137282	AT4G27650	16(0)-17(0)	A	GTAG	GTAG	Eukaryotic release factor 1 (eRF1) family protein	PELOTA (PEL1); FUNCTIONS IN: translation release factor activity; INVOLVED IN: meiosis, translational termination, translation; EXPRESSED IN: 23 plant structures; EXPRESSED DURING: 13 growth stages; CONTAINS InterPro DOMAIN/s: eRF1 domain 2 (InterPro:IPR005141), eRF1 domain 3 (InterPro:IPR005142), eRF1 domain 1 (InterPro:IPR005140), Probable translation factor pelota (InterPro:IPR004405); BEST Ar…	50S ribosomal protein L30e-like | Translation release factor pelota | eRF1 domain 1/Pelota-like | eRF1 domain 2 | eRF1 domain 3
0.403351	0.422611	AT4G30200	1(0)-2(0)	A	GTAG	GTAG	vernalization5/VIN3-like	vernalization5/VIN3-like (VEL1); FUNCTIONS IN: molecular_function unknown; INVOLVED IN: vegetative to reproductive phase transition of meristem; LOCATED IN: PcG protein complex; EXPRESSED IN: 24 plant structures; EXPRESSED DURING: 15 growth stages; CONTAINS InterPro DOMAIN/s: Protein of unknown function DUF1423, plant (InterPro:IPR004082), Fibronectin, type III-like fold (InterPro:IPR008957), Fib…	Fibronectin, type III | Immunoglobulin-like fold
0.165213	0.128506	AT4G34140	1(0)-2(0)	D	GCAG	GCAG	D111/G-patch domain-containing protein	D111/G-patch domain-containing protein; FUNCTIONS IN: nucleic acid binding; LOCATED IN: intracellular; EXPRESSED IN: 16 plant structures; EXPRESSED DURING: 7 growth stages; CONTAINS InterPro DOMAIN/s: D111/G-patch (InterPro:IPR000467); BEST Arabidopsis thaliana protein match is: suppressor of abi3-5 (TAIR:AT3G54230.2)	G-patch domain
0.279384	0.210609	AT4G36190	6(0)-7(0)	A	GTAG	GTAG	Serine carboxypeptidase S28 family protein	Serine carboxypeptidase S28 family protein; FUNCTIONS IN: serine-type peptidase activity; INVOLVED IN: proteolysis; LOCATED IN: vacuole; EXPRESSED IN: male gametophyte, guard cell, pollen tube; EXPRESSED DURING: L mature pollen stage, M germinated pollen stage; CONTAINS InterPro DOMAIN/s: Peptidase S28 (InterPro:IPR008758); BEST Arabidopsis thaliana protein match is: Serine carboxypeptidase S28 f…	Alpha/Beta hydrolase fold | Peptidase S28
0.0317148	0	AT5G05110	1(0)-2(+1)	D	TTAG	TTAG	Cystatin/monellin family protein	Cystatin/monellin family protein; FUNCTIONS IN: cysteine-type endopeptidase inhibitor activity; INVOLVED IN: biological_process unknown; LOCATED IN: endomembrane system; EXPRESSED IN: 23 plant structures; EXPRESSED DURING: 15 growth stages; CONTAINS InterPro DOMAIN/s: Proteinase inhibitor I25, cystatin, conserved site (InterPro:IPR018073), Proteinase inhibitor I25, cystatin (InterPro:IPR000010), …	Cystatin | Proteinase inhibitor I25, cystatin | Proteinase inhibitor I25, cystatin, conserved region | Proteinase inhibitor I25, cystatin, conserved site
0.426933	0.42013	AT5G05800	3(0)-4(-197)	D	GTAG	GTAG		unknown protein; FUNCTIONS IN: molecular_function unknown; INVOLVED IN: biological_process unknown; LOCATED IN: cellular_component unknown; EXPRESSED IN: 24 plant structures; EXPRESSED DURING: 15 growth stages; BEST Arabidopsis thaliana protein match is: unknown protein (TAIR:AT3G11290.1)	Myb/SANT-like domain
0.20057	0.285297	AT5G06440	7(0)-8(0)	A	GTAG	GTAG		FUNCTIONS IN: molecular_function unknown; INVOLVED IN: biological_process unknown; LOCATED IN: mitochondrion; EXPRESSED IN: 22 plant structures; EXPRESSED DURING: 12 growth stages; BEST Arabidopsis thaliana protein match is: Polyketide cyclase/dehydrase and lipid transport superfamily protein (TAIR:AT3G11720.3)	START-like domain
0.178899	0.213445	AT5G10690	9(+5)-10(0)	A	GTAG	GTAG	pentatricopeptide (PPR) repeat-containing protein / CBS domain-containing protein	pentatricopeptide (PPR) repeat-containing protein / CBS domain-containing protein; INVOLVED IN: biological_process unknown; LOCATED IN: chloroplast; EXPRESSED IN: 23 plant structures; EXPRESSED DURING: 13 growth stages; CONTAINS InterPro DOMAIN/s: Pentatricopeptide repeat (InterPro:IPR002885), Cystathionine beta-synthase, core (InterPro:IPR000644); BEST Arabidopsis thaliana protein match is: Pent…	CBS domain | Pentatricopeptide repeat
0.0722741	0.12205	AT5G11580	2(0)-3(+10)	A	GTAG	GTAG	Regulator of chromosome condensation (RCC1) family protein	Regulator of chromosome condensation (RCC1) family protein; CONTAINS InterPro DOMAIN/s: Regulator of chromosome condensation/beta-lactamase-inhibitor protein II (InterPro:IPR009091), Regulator of chromosome condensation, RCC1 (InterPro:IPR000408); BEST Arabidopsis thaliana protein match is: Regulator of chromosome condensation (RCC1) family protein (TAIR:AT5G63860.1)	Galactose oxidase/kelch, beta-propeller | Regulator of chromosome condensation 1/beta-lactamase-inhibitor protein II | Regulator of chromosome condensation, RCC1
0.267775	0.259044	AT5G14060	1(0)-2(0)	A	GTAG	GTAG	Aspartate kinase family protein	CARAB-AK-LYS; FUNCTIONS IN: amino acid binding, aspartate kinase activity; INVOLVED IN: aspartate family amino acid biosynthetic process; CONTAINS InterPro DOMAIN/s: Aspartate kinase, conserved site (InterPro:IPR018042), Aspartate/glutamate/uridylate kinase (InterPro:IPR001048), Amino acid-binding ACT (InterPro:IPR002912), Aspartate kinase domain (InterPro:IPR001341); BEST Arabidopsis thaliana pr…	ACT domain | Aspartate kinase domain | Aspartate kinase, conserved site | Aspartate/glutamate/uridylate kinase
0.250435	0.269417	AT5G15020	22(0)-23(0)	A	GTAG	GTAG	SIN3-like 2	SIN3-like 2 (SNL2); FUNCTIONS IN: molecular_function unknown; INVOLVED IN: regulation of transcription, DNA-dependent; LOCATED IN: nucleus; EXPRESSED IN: 23 plant structures; EXPRESSED IN: 24 plant structures; EXPRESSED DURING: 13 growth stages; CONTAINS InterPro DOMAIN/s: Histone deacetylase interacting (InterPro:IPR013194), Paired amphipathic helix (InterPro:IPR003822); BEST Arabidopsis thalian…	Histone deacetylase interacting | Paired amphipathic helix
0.234967	0.238271	AT5G16030	2(0)-3(0)	A	GTAG	GTAG		unknown protein; FUNCTIONS IN: molecular_function unknown; INVOLVED IN: biological_process unknown; LOCATED IN: cellular_component unknown; EXPRESSED IN: 20 plant structures; EXPRESSED DURING: 13 growth stages; BEST Arabidopsis thaliana protein match is: unknown protein (TAIR:AT3G02500.1)
0.268617	0.179624	AT5G22210	1(0)-2(-15)	A	GTAG	GTAG		unknown protein; FUNCTIONS IN: molecular_function unknown; INVOLVED IN: N-terminal protein myristoylation; LOCATED IN: cellular_component unknown
0.399226	0.45917	AT5G23090	4(0)-5(0)	A	GTAG	GTAG	nuclear factor Y, subunit B13	nuclear factor Y, subunit B13 (NF-YB13); CONTAINS InterPro DOMAIN/s: Transcription factor CBF/NF-Y/archaeal histone (InterPro:IPR003958), Histone-fold (InterPro:IPR009072); FUNCTIONS IN: sequence-specific DNA binding transcription factor activity; BEST Arabidopsis thaliana protein match is: nuclear factor Y, subunit B12 (TAIR:AT5G08190.2); INVOLVED IN: regulation of transcription; LOCATED IN: nuc…	Histone-fold | Transcription factor CBF/NF-Y/archaeal histone
0.108179	0.219256	AT5G24060	8(+10)-9(0)	A	GTAG	GTAG	Pentatricopeptide repeat (PPR) superfamily protein	Pentatricopeptide repeat (PPR) superfamily protein; FUNCTIONS IN: molecular_function unknown; INVOLVED IN: biological_process unknown; LOCATED IN: cellular_component unknown; BEST Arabidopsis thaliana protein match is: Pentatricopeptide repeat (PPR) superfamily protein (TAIR:AT3G49140.1)	FMN-binding split barrel
0.056252	0.0471373	AT5G26742	1(-3)-2(0)	A	GTAG	GTAG	DEAD box RNA helicase (RH3)	embryo defective 1138 (emb1138); FUNCTIONS IN: in 6 functions; INVOLVED IN: embryo development ending in seed dormancy; EXPRESSED IN: guard cell; LOCATED IN: chloroplast, chloroplast stroma, membrane; LOCATED IN: chloroplast, membrane; CONTAINS InterPro DOMAIN/s: DNA/RNA helicase, DEAD/DEAH box type, N-terminal (InterPro:IPR011545), GUCT (InterPro:IPR012562), DEAD-like helicase, N-terminal (Inter…	DEAD/DEAH box helicase domain | GUCT | Helicase, C-terminal | Helicase, superfamily 1/2, ATP-binding domain | P-loop containing nucleoside triphosphate hydrolase | RNA helicase, DEAD-box type, Q motif | Zinc finger, CCHC-type
0.354661	0.24126	AT5G39790	4(0)-5(0)	A	GTAG	GTAG	5'-AMP-activated protein kinase-related	5'-AMP-activated protein kinase-related; BEST Arabidopsis thaliana protein match is: 5'-AMP-activated protein kinase-related (TAIR:AT1G27070.1)	Immunoglobulin E-set
0.330746	0.365706	AT5G43470	1(0)-2(0)	A	GTAG	GTAG	Disease resistance protein (CC-NBS-LRR class) family	RECOGNITION OF PERONOSPORA PARASITICA 8 (RPP8); FUNCTIONS IN: nucleotide binding; INVOLVED IN: defense response to virus, response to light stimulus, response to other organism, defense response, plant-type hypersensitive response; LOCATED IN: plasma membrane; EXPRESSED IN: cultured cell; CONTAINS InterPro DOMAIN/s: NB-ARC (InterPro:IPR002182), Disease resistance protein (InterPro:IPR000767); BES…	NB-ARC | P-loop containing nucleoside triphosphate hydrolase
0.368109	0.397538	AT5G45940	1(0)-2(0)	A	GTAG	GTAG	nudix hydrolase homolog 11	nudix hydrolase homolog 11 (NUDT11); CONTAINS InterPro DOMAIN/s: NUDIX hydrolase domain-like (InterPro:IPR015797), NUDIX hydrolase domain (InterPro:IPR000086); FUNCTIONS IN: hydrolase activity, NAD+ diphosphatase activity, CoA pyrophosphatase activity; BEST Arabidopsis thaliana protein match is: nudix hydrolase homolog 15 (TAIR:AT1G28960.2); INVOLVED IN: multicellular organismal development; LOCA…	NUDIX hydrolase domain | NUDIX hydrolase domain-like
0.281038	0.304425	AT5G53180	8(+3)-9(0)	A	GTAG	GTAG	polypyrimidine tract-binding protein 2	polypyrimidine tract-binding protein 2 (PTB2); FUNCTIONS IN: RNA binding, nucleotide binding, nucleic acid binding; INVOLVED IN: pollen germination, regulation of RNA splicing, regulation of translation; LOCATED IN: nucleus, cytoplasmic mRNA processing body, cytoplasm; EXPRESSED IN: 31 plant structures; EXPRESSED DURING: 16 growth stages; CONTAINS InterPro DOMAIN/s: RNA recognition motif, RNP-1 (…	Nucleotide-binding, alpha-beta plait | RNA recognition motif domain
0.169501	0.162065	AT5G57860	1(0)-2(0)	A	GTAG	GTAG	Ubiquitin-like superfamily protein	Ubiquitin-like superfamily protein; CONTAINS InterPro DOMAIN/s: Ubiquitin (InterPro:IPR000626), Ubiquitin supergroup (InterPro:IPR019955)	Ubiquitin-like | Ubiquitin-related domain
0.35029	0.404444	AT5G65450	6(0)-7(+8)	A	GTAG	GTAG	ubiquitin-specific protease 17	ubiquitin-specific protease 17 (UBP17); FUNCTIONS IN: cysteine-type endopeptidase activity, ubiquitin thiolesterase activity, zinc ion binding; INVOLVED IN: ubiquitin-dependent protein catabolic process; LOCATED IN: mitochondrion; EXPRESSED IN: 24 plant structures; EXPRESSED DURING: 12 growth stages; CONTAINS InterPro DOMAIN/s: Zinc finger, MYND-type (InterPro:IPR002893), Peptidase C19, ubiquitin…	Peptidase C19, ubiquitin carboxyl-terminal hydrolase | Peptidase C19, ubiquitin carboxyl-terminal hydrolase, conserved site | Ubiquitin carboxyl-terminal hydrolase-like domain | Zinc finger, MYND-type
0.121593	0.0818012	GFP	1(-257)-2(-5)	D/A	ATAC	ATAC

## Sheet: GO_Share_FC<=0.5_C
Term Name	GOID	Term Type	Depth	cnt(reference)	cnt(AS_share_reduce)	fsh(AS_share_reduce)
intracellular	GO:0005622	C	3	8832	47	9.13901e-08
intracellular part	GO:0044424	C	3	8536	46	9.72549e-08
intracellular membrane-bounded organelle	GO:0043231	C	4	7308	40	9.02399e-07
membrane-bounded organelle	GO:0043227	C	3	7311	40	9.12481e-07
intracellular organelle	GO:0043229	C	3	7643	41	1.02452e-06
organelle	GO:0043226	C	2	7647	41	1.03941e-06
cytoplasm	GO:0005737	C	4	6362	36	2.10027e-06
chloroplast	GO:0009507	C	6	2937	22	6.03081e-06
plastid	GO:0009536	C	5	3020	22	9.41025e-06
cell	GO:0005623	C	2	14569	58	2.71461e-05
cell part	GO:0044464	C	2	14569	58	2.71461e-05
cytoplasmic part	GO:0044444	C	4	5921	31	7.4351e-05
cellular_component	GO:0005575	C	1	22522	74	0.000504811
chloroplast part	GO:0044434	C	5	964	9	0.00103748
plastid part	GO:0044435	C	4	1019	9	0.0015222
plastid thylakoid	GO:0031976	C	5	362	5	0.00279735
chloroplast thylakoid	GO:0009534	C	6	362	5	0.00279735
organelle subcompartment	GO:0031984	C	4	364	5	0.00286413
thylakoid part	GO:0044436	C	4	384	5	0.00359684
nucleus	GO:0005634	C	5	2435	14	0.00471172
nucleoid	GO:0009295	C	5	39	2	0.00482291
thylakoid	GO:0009579	C	4	456	5	0.0073584
PcG protein complex	GO:0031519	C	4	3	1	0.00792516

## Sheet: GO_Share_FC<=0.5_F
Term Name	GOID	Term Type	Depth	cnt(reference)	cnt(AS_share_reduce)	fsh(AS_share_reduce)
molecular_function	GO:0003674	F	1	25254	85	3.0018e-07
DNA topoisomerase activity	GO:0003916	F	4	17	2	0.000919295
histone binding	GO:0042393	F	4	19	2	0.0011519
ADP-glucose pyrophosphohydrolase activity	GO:0080042	F	8	1	1	0.00264865
2-succinyl-5-enolpyruvyl-6-hydroxy-3-cyclohexene-1-carboxylic-acid synthase activity	GO:0070204	F	5	1	1	0.00264865
1,4-dihydroxy-2-naphthoate octaprenyltransferase activity	GO:0046428	F	7	1	1	0.00264865
chromatin binding	GO:0003682	F	3	39	2	0.00482291
3-oxoacyl-[acyl-carrier-protein] synthase activity	GO:0004315	F	8	2	1	0.00529037
ADP-ribose pyrophosphohydrolase activity	GO:0080041	F	8	2	1	0.00529037
mannosyl-oligosaccharide 1,2-alpha-mannosidase activity	GO:0004571	F	8	2	1	0.00529037
polyprenyltransferase activity	GO:0002094	F	6	2	1	0.00529037
CoA pyrophosphatase activity	GO:0010945	F	7	2	1	0.00529037
mannosyl-oligosaccharide mannosidase activity	GO:0015924	F	7	2	1	0.00529037
NAD+ diphosphatase activity	GO:0000210	F	8	2	1	0.00529037
nucleic acid binding	GO:0003676	F	3	3352	17	0.00646685
histidine-tRNA ligase activity	GO:0004821	F	7	3	1	0.00792516

## Sheet: GO_Share_FC<=0.5_P
Term Name	GOID	Term Type	Depth	cnt(reference)	cnt(AS_share_reduce)	fsh(AS_share_reduce)
phylloquinone metabolic process	GO:0042374	P	6	6	2	0.000103335
phylloquinone biosynthetic process	GO:0042372	P	7	6	2	0.000103335
vitamin K biosynthetic process	GO:0042371	P	6	7	2	0.000144419
vitamin K metabolic process	GO:0042373	P	5	7	2	0.000144419
biological_process	GO:0008150	P	1	25320	81	0.000146553
photosynthesis, light reaction	GO:0019684	P	5	102	4	0.000160281
fat-soluble vitamin metabolic process	GO:0006775	P	5	14	2	0.000618305
fat-soluble vitamin biosynthetic process	GO:0042362	P	6	14	2	0.000618305
DNA topological change	GO:0006265	P	4	16	2	0.000812541
quinone cofactor metabolic process	GO:0042375	P	5	18	2	0.00103243
quinone cofactor biosynthetic process	GO:0045426	P	6	18	2	0.00103243
photosynthesis	GO:0015979	P	4	184	4	0.00147851
coenzyme biosynthetic process	GO:0009108	P	6	86	3	0.00156826
DNA conformation change	GO:0071103	P	3	90	3	0.00178661
ethylene biosynthetic process	GO:0009693	P	6	28	2	0.00250718
ethylene metabolic process	GO:0009692	P	5	28	2	0.00250718
mucilage pectin biosynthetic process	GO:0048358	P	6	1	1	0.00264865
mucilage pectin metabolic process	GO:0048363	P	5	1	1	0.00264865
cellular alkene metabolic process	GO:0043449	P	4	29	2	0.00268828
alkene biosynthetic process	GO:0043450	P	5	29	2	0.00268828
cellular macromolecular complex subunit organization	GO:0034621	P	5	217	4	0.00269093
post-embryonic root morphogenesis	GO:0010101	P	5	30	2	0.00287535
lateral root morphogenesis	GO:0010102	P	6	30	2	0.00287535
macromolecular complex subunit organization	GO:0043933	P	4	233	4	0.00347092
regulation of response to stimulus	GO:0048583	P	3	235	4	0.00357812
regulation of signaling	GO:0023051	P	3	120	3	0.00403425
regulation of signal transduction	GO:0009966	P	4	120	3	0.00403425
positive regulation of salicylic acid mediated signaling pathway	GO:0080151	P	5	2	1	0.00529037
root morphogenesis	GO:0010015	P	4	134	3	0.00548475
plant-type hypersensitive response	GO:0009626	P	5	42	2	0.00557519
host programmed cell death induced by symbiont	GO:0034050	P	5	43	2	0.00583714
photosynthetic electron transport chain	GO:0009767	P	5	44	2	0.00610463
cellular response to chemical stimulus	GO:0070887	P	4	444	5	0.00659604
generation of precursor metabolites and energy	GO:0006091	P	4	282	4	0.00678551
coenzyme metabolic process	GO:0006732	P	5	148	3	0.00721192
regulation of salicylic acid mediated signaling pathway	GO:2000031	P	5	3	1	0.00792516
regulation of short-day photoperiodism, flowering	GO:0048587	P	5	3	1	0.00792516
photosystem I stabilization	GO:0042550	P	7	3	1	0.00792516
histidyl-tRNA aminoacylation	GO:0006427	P	7	3	1	0.00792516
innate immune response	GO:0045087	P	4	299	4	0.00830094
protein complex subunit organization	GO:0071822	P	5	157	3	0.00847397
immune response	GO:0006955	P	3	303	4	0.00868719
metabolic process	GO:0008152	P	2	10203	38	0.00911804
cofactor biosynthetic process	GO:0051188	P	5	162	3	0.00922764
